# Supplementary material
Source: Research Square preprint supplement (doi:10.21203/rs.3.rs-9628093/v1)
Supplement: Supplementary file 1 [file 5e73ed9e5ccc6346dc70ffba.docx]

# **6. Supplementary Material**


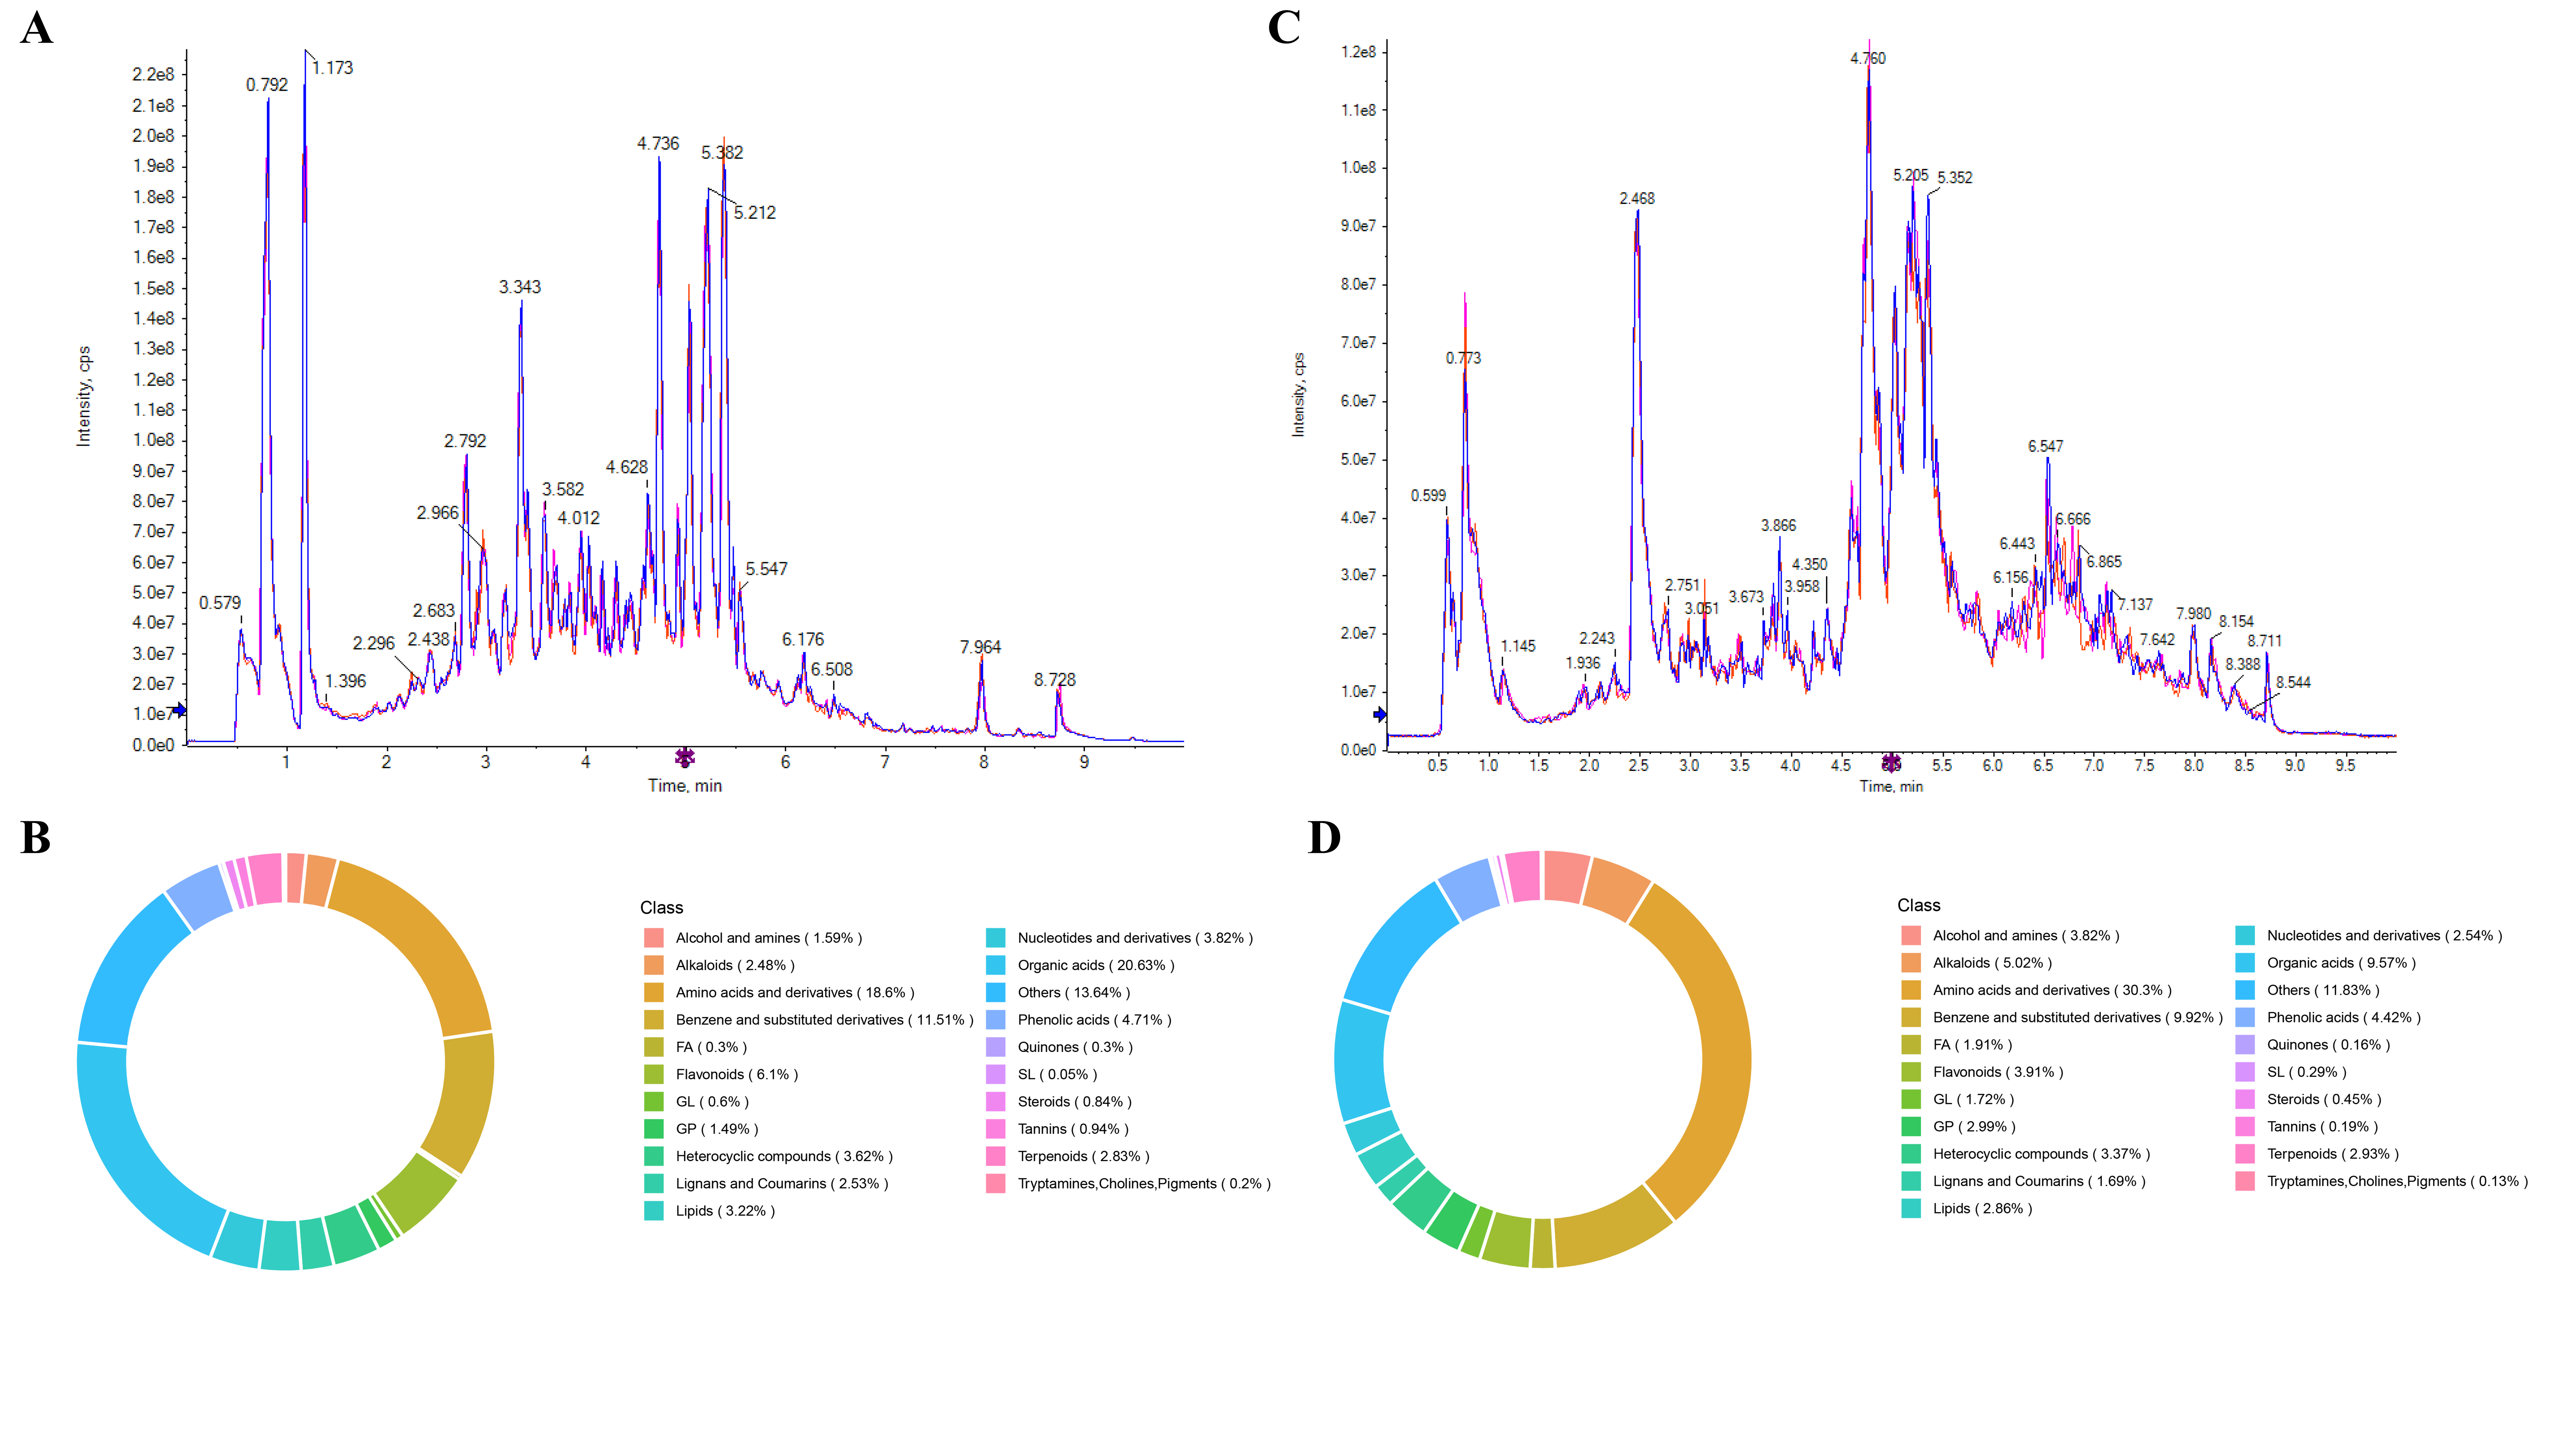


Figure1A Quality Control Analysis of Metabolomics Data from Different Coppicing Treatments
