# Supplementary material
Source: Research Square preprint supplement (doi:10.21203/rs.3.rs-9628093/v1)
Supplement: Supplementary file 1 [file 380bbfe6d60b687c821b82c2.xlsx]

## Sheet: Sheet1
Index	Compounds	物质	Class I	物质一级分类	Class II	物质二级分类	Formula	Level	score	CAS	DNP-1	DNP-2	DNP-3	DCK-1	DCK-2	DCK-3	VIP	P-value	FDR	Fold_Change	Log2FC	Type	cpd_ID	kegg_map
MW0003138	2-Hydroxybenzyl alcohol	水杨醇；邻羟基苄醇	Phenolic acids	酚酸类	Phenolic acids	酚酸类	C7H8O2	2	0.9613	90-01-7	33986.4	26140.4	25073.1	80012.3	60351.2	58694.8	1.39569	0.0192335	0.11637	0.428015	-1.22427	down	C02323	-
pme0321	Kaempferol-7-rhamnoside	山柰酚-7-O-鼠李糖苷	Flavonoids	黄酮	Flavonols	黄酮醇	C21H20O10	2	0.9131	20196-89-8	18363.1	23318	16418.1	23798.9	42389.7	72105.7	1.11028	0.195605	0.370178	0.420113	-1.25115	down	-	-
MW0141122	Dioleoylphosphatidylcholine	二油酰磷脂酰胆碱	GP	甘油磷脂类	PC	磷脂酰胆碱	C44H84NO8P	2	0.9082	52088-89-8	1.51246e+07	1.66861e+07	3.2712e+07	3.12108e+07	6.76338e+07	5.42715e+07	1.13958	0.0903062	0.242163	0.421397	-1.24675	down	-	-
MW0158008	(E)-3,5,4'-Trimethoxystilbene	白藜芦醇三甲醚	Others	其它类	Stilbene	茋类	C17H18O3	2	0.8866	22255-22-7	16242.7	52515.4	21034	80929.8	66863.2	56138	1.16751	0.0577876	0.191936	0.440306	-1.18342	down	-	-
MW0056883	Colfosceril palmitate	菊苣棕榈酸酯	GP	甘油磷脂类	PC	磷脂酰胆碱	C40H80NO8P	2	0.8838	63-89-8	41840.2	80264.7	38089.3	119946	186821	142182	1.31908	0.0199043	0.117797	0.35682	-1.48673	down	C00157	ko00564,ko00590,ko00591,ko00592,ko01100,ko01110
MEDP2286	Celastrol	雷公藤红素	Benzene and substituted derivatives	苯及其衍生物	Benzene and substituted derivatives	苯及其衍生物	C29H38O4	2	0.8751	34157-83-0	3878.48	7081.33	11760.1	2246.41	3470.86	4681.93	1.02064	0.208288	0.383916	2.18478	1.12749	up	-	-
MW0006042	2-Hydroxy-6-pentadecylbenzoic acid	2-羟基-6-十五烷基苯甲酸	Benzene and substituted derivatives	苯及其衍生物	Benzene and substituted derivatives	苯及其衍生物	C22H36O3	2	0.8737	16611-84-0	59655.6	54563.1	41619.2	22256.3	18298.7	22297.4	1.39743	0.0233377	0.127097	2.47943	1.31001	up	C10759	-
MW0108619	N-Acetyl-D-phenylalanine	N-乙酰-D-苯丙氨酸	Amino acids and derivatives	氨基酸及其衍生物	Amino acids and derivatives	氨基酸及其衍生物	C11H13NO3	2	0.8663	10172-89-1	365682	374047	372862	142497	164699	154890	1.45687	0.000179543	0.0273488	2.40775	1.26769	up	C05620	ko00470,ko01100
MW0115093	p-Coumaryl alcohol 4-O-glucoside	对香豆醇-4-O-葡萄糖苷	Phenolic acids	酚酸类	Phenolic acids	酚酸类	C15H20O7	2	0.8618	120442-73-1	48115.7	52254.5	47440.1	103683	110645	101498	1.45611	0.000319908	0.029247	0.468011	-1.09539	down	C05855	ko00940,ko01110
MEDP0338	LysoPC 16:0	溶血磷脂酰胆碱 16:0	Lipids	脂质	LPC	溶血磷脂酰胆碱	C24H50NO7P	2	0.8559	17364-16-8	35834.2	35140.4	40372.8	13719	18375.9	18731.9	1.41664	0.000936019	0.042453	2.19072	1.13141	up	C04230	ko00564
MW0049063	Cryptotanshinone	隐丹参酮	Others	其它类	Ketone compounds	酮类化合物	C19H20O3	2	0.8105	35825-57-1 | 4733-35-1	344290	272647	312390	1.0693e+06	934559	1.32259e+06	1.43499	0.0171009	0.111808	0.279375	-1.83972	down	-	-
MW0012149	11-Oxoursolic acid acetate	11-氧乙酸	Others	其它类	Lactones	内酯类化合物	C32H48O5	2	0.8088	35959-01-4	399731	279495	303171	170705	141813	174526	1.37219	0.0379641	0.157139	2.01706	1.01226	up	-	-
MW0112702	3',4'-Dimethoxyacetophenone	3,4-二甲氧基苯基甲基酮	Others	其它类	Ketone compounds	酮类化合物	C10H12O3	2	0.8003	1131-62-0	77869.4	90989.6	75748.9	218411	337404	285509	1.42568	0.0268111	0.135663	0.290742	-1.78219	down	-	-
MW0108512	N-[(3s)-2-Oxotetrahydrofuran-3-Yl]hexanamide	N-己酰基-L-高丝氨酸内酯	Others	其它类	Lactones	内酯类化合物	C10H17NO3	2	0.7997	147852-83-3	50852.2	33144.8	46097.7	12658.7	11148	11239	1.4358	0.0259353	0.133615	3.71215	1.89226	up	C21197	-
MW0107797	Leu-Ile	亮氨酸异亮氨酸	Amino acids and derivatives	氨基酸及其衍生物	Amino acids and derivatives	氨基酸及其衍生物	C12H24N2O3	2	0.7968	36077-41-5 | 91605-03-7	73769.4	45658.1	346788	9777.49	15245.9	20611.7	1.24614	0.281699	0.452325	10.2161	3.35278	up	-	-
MW0011930	1,2-Dimyristoyl-sn-glycero-3-phosphocholine	1,2-二十四烷酰基-sn-甘油-3-磷酸胆碱	GP	甘油磷脂类	PC	磷脂酰胆碱	C36H72NO8P	2	0.7886	18194-24-6	25929.7	51611.2	39990.8	122106	143500	147286	1.39348	0.000813515	0.0409825	0.284655	-1.81271	down	-	-
MEDP0362	D-(+)-Neopterin	新蝶呤	Alkaloids	生物碱	Alkaloids	生物碱	C9H11N5O4	2	0.7878	2009-64-5	30351.1	80486.4	52416	256227	245633	218585	1.37796	0.000726775	0.039212	0.226601	-2.14177	down	C05926	ko00790
MW0147323	Cellotetraose	纤维四糖	Others	其它类	Saccharides	糖类	C24H42O21	2	0.7867	38819-01-1	16350.3	1864.25	7209.7	32056.6	41662.8	25855.2	1.14329	0.0169575	0.111733	0.255328	-1.96957	down	C02013	-
MEDN1108	Levoglucosan	1,6-脱水-β-D-葡萄糖	Others	其它类	Saccharides	糖类	C6H10O5	2	0.7838	498-07-7	77112	65095.6	39857	110809	187846	242998	1.2797	0.0790818	0.226087	0.336128	-1.57292	down	-	-
MW0012950	1-O-Octadecyl-2-O-methyl-sn-glycero-3-phosphocholine	2-O-甲基PAF C-18	GP	甘油磷脂类	PC	磷脂酰胆碱	C27H58NO6P	2	0.783	77286-66-9	10428.7	17745.5	46604.7	180119	100261	78818	1.2484	0.0778633	0.224141	0.208183	-2.26408	down	-	-
MEDN0284	Leucinic acid	2-羟基-4-甲基戊酸	Organic acids	有机酸	Organic acids	有机酸	C6H12O3	2	0.7811	498-36-2	29931.6	25608.4	33907.8	85405.4	68749.7	65095.3	1.40992	0.0117707	0.0973487	0.407971	-1.29346	down	-	-
MW0053734	Glycerophospho-N-Palmitoyl Ethanolamine	甘油磷酸-N-棕榈酰乙醇胺	GP	甘油磷脂类	PE	磷脂酰乙醇胺	C21H44NO7P	2	0.7806	100575-09-5	418245	413796	628545	160936	196215	244036	1.36372	0.0443256	0.16947	2.4295	1.28066	up	-	-
MW0109433	Pro-Ser	L-脯氨酰-L-丝氨酸	Amino acids and derivatives	氨基酸及其衍生物	Amino acids and derivatives	氨基酸及其衍生物	C8H14N2O4	2	0.7798	71835-80-8	10344.1	23289.2	11256.2	38881.6	55160.8	33208.8	1.29296	0.0319859	0.146752	0.352763	-1.50323	down	-	-
MW0116253	N-1,3-benzoxazol-2-ylguanidine	N-苯并恶唑-2-基胍	Benzene and substituted derivatives	苯及其衍生物	Benzene and substituted derivatives	苯及其衍生物	C8H8N4O	2	0.7791	39123-82-5	155147	144971	139503	552894	512555	408004	1.44477	0.014532	0.105687	0.298361	-1.74487	down	-	-
pme0376	Naringenin	柚皮素	Flavonoids	黄酮	Flavanones	二氢黄酮	C15H12O5	2	0.7774	480-41-1	15536.3	17993.7	5232.43	795.18	959.93	7710.16	1.07421	0.113639	0.273204	4.09523	2.03394	up	C00509	ko00941,ko00943,ko01100,ko01110
MW0055340	N-(9Z-octadecenoyl)-sphing-4-enine-1-phosphocholine	N-油酰基-D-赤型鞘氨酰基磷酰胆碱	SL	鞘脂类	SM	鞘磷脂	C41H81N2O6P	2	0.7767	108392-10-5	844301	781119	513123	330392	345222	274962	1.33216	0.0543946	0.187791	2.24973	1.16975	up	-	-
MW0123058	Benzimidazole	苯并咪唑	Benzene and substituted derivatives	苯及其衍生物	Benzene and substituted derivatives	苯及其衍生物	C7H6N2	2	0.7761	51-17-2	23008.6	30459.5	20806	10273	6924.08	10537.4	1.3631	0.0218135	0.121749	2.67804	1.42118	up	C02009	-
MW0106770	gamma-Glutamylglutamate	γ-谷氨酰谷氨酸	Amino acids and derivatives	氨基酸及其衍生物	Amino acids and derivatives	氨基酸及其衍生物	C10H16N2O7	2	0.7761	1116-22-9	20592.3	14215.9	18414.8	57719.6	62455.9	49720.3	1.42198	0.00276512	0.0644733	0.313269	-1.67453	down	C05282	-
MW0138536	Isorhoifolin	异山豆素	Heterocyclic compounds	杂环化合物	Heterocyclic compounds	杂环化合物	C27H30O14	2	0.7757	552-57-8	62944.3	33454.6	59459.1	147027	147366	110633	1.31845	0.00681092	0.0830155	0.38481	-1.37778	down	-	-
MW0107840	Leucylproline	亮氨酰脯氨酸	Amino acids and derivatives	氨基酸及其衍生物	Amino acids and derivatives	氨基酸及其衍生物	C11H20N2O3	2	0.7753	6403-35-6	116898	77620.9	59794.7	178093	184228	151185	1.2871	0.0181662	0.115392	0.49525	-1.01377	down	-	-
MW0125148	Methyl dodecanoate	十二烷酸甲酯	FA	脂肪酰类	Others	其它	C13H26O2	2	0.7739	111-82-0	170128	181070	168420	67458.1	66391.3	83296	1.43772	0.000210426	0.0275633	2.39295	1.25879	up	-	-
MW0015606	Ailanthone	臭椿酮	Terpenoids	萜类	Ditepenoids	二萜	C20H24O7	2	0.7733	981-15-7	11981.5	18838.7	19022.5	74041.6	63110.1	38207.1	1.35516	0.052819	0.183994	0.284233	-1.81485	down	C08747	-
MW0119221	3',5'-Cyclic dAMP	3'，5'-环-2'-脱氧腺苷单磷酸	Nucleotides and derivatives	核苷酸及其衍生物	Nucleotides and derivatives	核苷酸及其衍生物	C10H12N5O5P	2	0.7728	1157-33-1	47450.3	53798.8	66822.3	24700	23567.5	27005.1	1.41751	0.0291541	0.140472	2.23284	1.15888	up	C00968	-
MEDN1400	4-Methoxysalicylic acid	4-甲氧基水杨酸	Phenolic acids	酚酸类	Phenolic acids	酚酸类	C8H8O4	2	0.768	2237-36-7	4442.98	6143.9	1148.56	124.43	330.67	2042.42	1.03083	0.159054	0.331689	4.69884	2.2323	up	-	-
MW0146360	Asp-Lys	L-天冬氨酰-L-赖氨酸	Amino acids and derivatives	氨基酸及其衍生物	Amino acids and derivatives	氨基酸及其衍生物	C10H19N3O5	2	0.7665	5891-51-0	32667.8	46759.9	48090.7	105987	106186	91431.9	1.39663	0.00107336	0.0448686	0.420014	-1.25149	down	-	-
MW0005300	4-Phenyl-2-butanol	4-苯基-2-丁醇	Benzene and substituted derivatives	苯及其衍生物	Benzene and substituted derivatives	苯及其衍生物	C10H14O	2	0.7661	2344-70-9	48228.2	48561.7	32700.9	104539	89159.2	114311	1.39702	0.00382524	0.0685005	0.420412	-1.25012	down	-	-
MW0169689	Pomiferin	石榴苷	Flavonoids	黄酮	Other Flavonoids	其它类黄酮	C25H24O6	2	0.7647	572-03-2	289122	212087	342542	105631	109574	117238	1.40717	0.044968	0.170563	2.53803	1.34371	up	-	-
MW0106444	Dihydrofolic acid	二氢叶酸	Organic acids	有机酸	Organic acids	有机酸	C19H21N7O6	2	0.7645	4033-27-6	8059.7	13295.8	8489.89	60423.2	58655.5	39394.8	1.42397	0.0188595	0.116237	0.188331	-2.40866	down	C00415	ko00670,ko00790,ko01100,ko01240
MW0007411	Isoeugenyl acetate	乙酰异丁香酚	Phenolic acids	酚酸类	Phenolic acids	酚酸类	C12H14O3	2	0.7642	93-29-8	18659.1	12125.8	17621.4	34078	39159.4	45252.3	1.37019	0.00621982	0.0799445	0.408527	-1.2915	down	-	-
MW0010577	2,3-Bis(1,3-benzodioxol-5-ylmethyl)butane-1,4-diol	2,3-双(1,3-benzodioxol-5-ylmethyl)butane-1,4-diol	Lignans and Coumarins	木脂素和香豆素	Lignans	木脂素	C20H22O6	2	0.7632	24563-03-9	585515	609361	621149	1.66188e+06	1.31154e+06	1.39312e+06	1.44389	0.0144493	0.105625	0.415895	-1.26571	down	C10558	-
MW0126037	Papaverine	罂粟碱	Alkaloids	生物碱	Isoquinoline alkaloids	异喹啉类生物碱	C20H21NO4	2	0.7625	61-25-6	38949.8	17004.6	45256.4	9915.11	11471.6	24035.5	1.04106	0.149394	0.320475	2.22822	1.15589	up	C06533	ko00950,ko01110
MW0063332	Vitamin A palmitate	视黄醇棕榈酸酯	FA	脂肪酰类	Others	其它	C36H60O2	2	0.7621	79-81-2	41694.7	39445.6	35156	110943	68819.4	103292	1.38441	0.0475416	0.175213	0.410863	-1.28327	down	C02588	ko01100
MW0012936	1-Oleoyl-2-acetyl-sn-glycerol	1-油酰基-2-乙酰基-sn-甘油	GL	甘油脂类	DG	甘油二酯	C23H42O5	2	0.7596	86390-77-4 | 92282-11-6	100674	98088.9	64587.8	23973.9	21876.9	38935.6	1.34706	0.0215362	0.121419	3.10605	1.63508	up	-	-
MW0137985	Dihydrosamidin	Dihydrosamidin(Corymbocoumarin)(Suksdorfin)	Lignans and Coumarins	木脂素和香豆素	Coumarins	香豆素	C21H24O7	2	0.7585	6005-18-1 | 4992-73-8	11490.2	7073.99	8356.95	2279.46	4854.43	3064.01	1.30473	0.0310903	0.145352	2.63987	1.40047	up	C09260	-
MEDL00365	Tyrosylleucine	酪氨酸-亮氨酸	Amino acids and derivatives	氨基酸及其衍生物	Amino acids and derivatives	氨基酸及其衍生物	C15H22N2O4	2	0.753	17355-10-1	15159	9541.47	14334.3	3228.48	4519.54	6418.9	1.33018	0.0242744	0.12925	2.75535	1.46224	up	C73328	-
MADP0567	Zebularine	4-脱氧尿苷	Nucleotides and derivatives	核苷酸及其衍生物	Nucleotides and derivatives	核苷酸及其衍生物	C9H12N2O5	2	0.7508	3690-10-6	56210.7	57244.3	64056.3	19291	15618.2	18844	1.45019	0.000830249	0.0409825	3.30234	1.72349	up	-	-
MW0012963	1-Palmitoyl-sn-glycero-3-phosphoethanolamine	溶血磷脂酰乙醇胺 16:0	Lipids	脂质	LPE	溶血磷脂酰乙醇胺	C21H44NO7P	2	0.7498	53862-35-4	166487	128341	93037.3	35598.2	34817.1	81649.2	1.21183	0.0450174	0.170563	2.55066	1.35087	up	-	-
mws4076	18alpha-Glycyrrhetinic acid	18α-甘草次酸	Organic acids	有机酸	Organic acids	有机酸	C30H46O4	2	0.749	1449-05-4	39053.2	34838.3	50997.4	12950	14178.9	9357.89	1.41857	0.01901	0.116285	3.42285	1.7752	up	-	-
MW0139371	Pinosylvin	银松素	Others	其它类	Stilbene	茋类	C14H12O2	2	0.7469	22139-77-1 | 102-61-4	89549.8	66224.6	115540	14745.9	42135.5	23858.1	1.3048	0.0275628	0.137427	3.36037	1.74862	up	C01745	ko00945,ko01110
MW0011719	Heudelottin C	HEUDELOTTIN C	Others	其它类	Lactones	内酯类化合物	C39H54O11	2	0.7467	11052-28-1	52244	52026	46562	8098.21	10763.3	23830.4	1.31975	0.00995982	0.09393	3.53304	1.82091	up	-	-
MW0015937	Asclepin	马利筋苷	Steroids	甾体	Cardiac glycoside	强心苷	C31H42O10	2	0.7456	36573-63-4	38336.5	55374.8	33369.7	4248.38	1966.26	23220.5	1.15585	0.0264177	0.134406	4.31732	2.11014	up	C08849	-
MW0001218	Propylene glycol dibenzoate	DL-丙二醇二苯甲酸酯	Benzene and substituted derivatives	苯及其衍生物	Benzene and substituted derivatives	苯及其衍生物	C17H16O4	2	0.7432	19224-26-1	16646.5	16018	8710.24	40669.7	50012.1	40990	1.38217	0.00187012	0.0519602	0.314226	-1.67013	down	-	-
MW0049106	Cyclopamine	环巴胺	Alkaloids	生物碱	Terpenoid alkaloids	萜类生物碱	C27H41NO2	2	0.7399	4449-51-8 | 11051-96-0	17553.3	34024.1	18403.4	42684.2	373647	161061	1.17569	0.22248	0.397652	0.121201	-3.04452	down	C10798	-
MW0055121	Glyceryl monooleate	MAG 18:1	GL	甘油脂类	MG	单甘油酯	C21H40O4	2	0.7386	111-03-5 | 25496-72-4 | 33978-07-3 | 925-14-4	68254	57282.2	44072.6	28758.2	18079.6	22597.4	1.33908	0.0264	0.134406	2.44269	1.28847	up	-	-
MW0052336	Diethyl fumarate	富马酸二乙酯	Others	其它类	Lactones	内酯类化合物	C8H12O4	2	0.735	623-91-6 | 26298-06-6	148524	149930	145480	321222	340401	273600	1.4392	0.0140806	0.104368	0.474683	-1.07496	down	-	-
MW0124096	Famprofazone	法洛丙宗	Others	其它类	Ketone compounds	酮类化合物	C24H31N3O	2	0.7327	22881-35-2	127214	98310.1	117280	46043.8	40549.5	61057.2	1.38841	0.00462285	0.0721689	2.32172	1.2152	up	-	-
MW0137756	Tricoumaroyl spermidine	N1，N5，N10-三香豆酰亚精胺	Heterocyclic compounds	杂环化合物	Heterocyclic compounds	杂环化合物	C34H37N3O6	2	0.7279	131086-78-7 | 364368-18-3	27462.5	31018.6	40956.1	6907.85	10504	15535.2	1.33768	0.0146039	0.105733	3.01809	1.59364	up	C18069	ko00940,ko01110
MW0124226	Garcinone D	伽升沃 D	Flavonoids	黄酮	Other Flavonoids	其它类黄酮	C24H28O7	2	0.726	107390-08-9	9272.7	12923.6	13257.3	24085	30314.9	22386.2	1.36249	0.0144933	0.105625	0.461718	-1.11492	down	-	-
MW0108782	N-Formyl-Met-Leu-Phe	N-甲酰基-L-甲硫氨酰-L-亮氨酰-L-苯丙氨酸	Amino acids and derivatives	氨基酸及其衍生物	Amino acids and derivatives	氨基酸及其衍生物	C21H31N3O5S	2	0.7198	59880-97-6	28200	15110.2	22810.1	11228.4	7943.91	13642.9	1.20447	0.0830089	0.230493	2.01493	1.01073	up	-	-
MW0008516	Diphenylmethylene-Glycine benzyl ester	N-(二苯基亚甲基）甘氨酸苄酯	Benzene and substituted derivatives	苯及其衍生物	Benzene and substituted derivatives	苯及其衍生物	C22H19NO2	2	0.7176	81477-91-0	81336.9	72407.8	79109.3	231302	230713	167244	1.42226	0.0234361	0.127334	0.370045	-1.43423	down	-	-
MW0159253	Val-Asn	缬氨酸-天冬酰胺	Amino acids and derivatives	氨基酸及其衍生物	Amino acids and derivatives	氨基酸及其衍生物	C9H17N3O4	2	0.7134	66170-00-1	38524	28231.1	7808.53	110154	103645	98978	1.27159	0.00697541	0.0832029	0.238392	-2.06859	down	-	-
MW0125626	N-Acetyl-L-tryptophanamide	乙炔基乙酰胺	Alcohol and amines	醇、胺类	Amines	胺类	C13H15N3O2	2	0.7074	2382-79-8	7651.07	5689.73	7600.05	32797.2	22417	26093.7	1.42631	0.0184532	0.11562	0.25755	-1.95707	down	-	-
MW0061828	Pinolenic Acid ethyl ester	松油酸乙酯	FA	脂肪酰类	Others	其它	C20H34O2	2	0.7069	493015-74-0	128973	104898	73818.8	50528.2	37153	31946	1.32073	0.0468872	0.17412	2.57208	1.36293	up	-	-
MW0108503	N,N-Dimethyl-L-histidine	N，N-二甲基组氨酸	Amino acids and derivatives	氨基酸及其衍生物	Amino acids and derivatives	氨基酸及其衍生物	C8H13N3O2	2	0.7033	24940-57-6	100353	119110	99798.5	231184	261418	238570	1.44581	0.000462114	0.034035	0.436643	-1.19548	down	C04259	-
MW0155655	Polyphyllin B	多酚B	Terpenoids	萜类	Terpene	萜类	C51H82O20	3	0.9986	50773-42-7	55412.5	51339.5	69726.4	23688.3	18755.1	20675.8	1.43209	0.016229	0.109924	2.79595	1.48334	up	-	-
MEDP0160	Adenosine	腺苷	Nucleotides and derivatives	核苷酸及其衍生物	Nucleotides and derivatives	核苷酸及其衍生物	C10H13N5O4	3	0.9883	58-61-7	1.7639e+06	1.13391e+06	397752	72681.3	227576	491830	1.06215	0.160148	0.333158	4.1606	2.05679	up	C00212	ko00230,ko01100,ko01232,ko02010
MW0129926	1-O-(3,4,5-Trimethoxybenzoyl)-b-D-glucopyranoside	1-O-(3,4,5-三甲氧基苯甲酰基)-bD-吡喃葡萄糖苷	Benzene and substituted derivatives	苯及其衍生物	Benzene and substituted derivatives	苯及其衍生物	C16H22O10	3	0.9818	56982-70-8	7689.55	7182.19	7058.37	17158.9	19975.9	13515.3	1.4051	0.0349059	0.151825	0.432973	-1.20765	down	-	-
MW0159737	Tunicamycin	Tunicamycin	Others	其它类	Others	其它	C39H64N4O16	3	0.9788	11089-65-9	7131.95	7614.95	22277.7	1846.37	638.15	1395.04	1.34373	0.155612	0.328009	9.54349	3.25452	up	C12063	-
MEDP0167	Guanosine	鸟苷	Nucleotides and derivatives	核苷酸及其衍生物	Nucleotides and derivatives	核苷酸及其衍生物	C10H13N5O5	3	0.9782	118-00-3 | 26578-09-6 | 197227-95-5 | 103654-69-9 | 103654-70-2 | 146849-94-7 | 197227-93-3 | 202933-46-8 | 244769-87-7 | 247226-75-1 | 250586-91-5 | 250586-97-1 | 30747-23-0	109551	93479.4	54277.4	33983.8	38520.9	51461.8	1.18264	0.102408	0.258786	2.07562	1.05354	up	C00387	ko00230,ko01100,ko01232,ko02010
ZINC43606255	Bruceine C	鸦胆子素C	Others	其它类	Lactones	内酯类化合物	C28H36O12	3	0.9709	25514-30-1	5068.15	1706.9	5887.3	18252.3	16099.2	9057.25	1.19262	0.0483863	0.176642	0.2917	-1.77744	down	-	-
MEDP0395	Pipecolic acid	哌啶酸	Alkaloids	生物碱	Alkaloids	生物碱	C6H11NO2	3	0.9703	535-75-1	76641.6	166724	86993.2	19893.8	25392	19506.6	1.38331	0.0890236	0.240383	5.09874	2.35014	up	C00408	ko00310,ko00960,ko01100,ko01110
MW0104030	(S,S)-Np-Histidinylalanine	（S，S)-NP-组氨酰丙氨酸	Organic acids	有机酸	Organic acids	有机酸	C9H14N4O4	3	0.97	87047-17-4	205918	166159	212359	79940.8	105707	97722.7	1.40668	0.00840635	0.0900819	2.06244	1.04435	up	-	-
MEDN1024	D-piperidine acid	D-哌啶酸	Organic acids	有机酸	Organic acids	有机酸	C6H11NO2	3	0.9646	1723-00-8	79809.9	185788	104688	17585	9020.86	22127.5	1.36543	0.0767029	0.223341	7.59821	2.92566	up	-	-
MEDL01799	Isoscutellarein	异野黄芩素	Flavonoids	黄酮	Flavones	黄酮	C15H10O6	3	0.9457	41440-05-5	270536	204756	155991	287896	445600	829715	1.13127	0.189157	0.363962	0.403837	-1.30815	down	-	-
MEDP1339	LPC(18:1/0:0)	LPC(18:1/0:0)	Lipids	脂质	LPC	溶血磷脂酰胆碱	C26H53NO7P	3	0.9426	3542-29-8	682021	569031	591828	167700	184357	232436	1.43647	0.00144074	0.0494223	3.15295	1.6567	up	-	-
MW0000136	Aquifoliunine EIV	Aquifoliunine EIV	Alkaloids	生物碱	Alkaloids	生物碱	C42H48N2O18	3	0.9402	220751-22-4	50263.2	38594.5	81443.3	13923.6	22907.9	13650.4	1.34572	0.0818571	0.230053	3.3735	1.75425	up	-	-
MEDL00414	D-Arabinose-5-phosphate	D-阿拉伯糖5-磷酸	Others	其它类	Saccharides	糖类	C5H11O8P	3	0.9328	13137-52-5	686807	746539	776806	319396	377056	381699	1.44041	0.000498316	0.0341033	2.04995	1.03559	up	C01112	ko01100,ko01250
MW0118122	2-[1-(2-hydroxybenzyl)-1H-benzimidazol-2-yl]phenol	2-[1-(2-羟基苄基)-1H-苯并咪唑-2-基]苯酚	Benzene and substituted derivatives	苯及其衍生物	Benzene and substituted derivatives	苯及其衍生物	C20H16N2O2	3	0.9315	85573-12-2	131020	119799	142528	459655	434667	413544	1.4519	0.000302621	0.029247	0.300755	-1.73334	down	-	-
MW0055301	Neryl rhamnosyl-glucoside	橙花鼠李糖苷	Terpenoids	萜类	Terpene	萜类	C22H38O10	3	0.925	84534-31-6	16902.5	18327.3	17054.3	7962.57	5716.21	6952.87	1.42478	0.000358606	0.0302533	2.53417	1.34152	up	-	-
MW0108928	4-((1,3-Dihydroxy-2-(hydroxymethyl)propan-2-yl)amino)butane-1-sulfonic acid	4-((1,3-二羟基-2-(羟甲基)丙-2-基)氨基)丁烷-1-磺酸	Organic acids	有机酸	Organic acids	有机酸	C8H19NO6S	3	0.9047	54960-65-5	27961.1	61338.6	53534.1	133705	132715	131718	1.33511	0.0135198	0.102003	0.358754	-1.47893	down	-	-
MEDL02426	Methyl benzoate	苯甲酸甲酯	Phenolic acids	酚酸类	Phenolic acids	酚酸类	C8H8O2	3	0.8935	93-58-3	266100	233986	271390	803625	700999	717555	1.44974	0.00174703	0.0513053	0.347171	-1.52628	down	-	-
MW0155573	Pilocereine	皮洛切莱因	Heterocyclic compounds	杂环化合物	Heterocyclic compounds	杂环化合物	C45H65N3O6	3	0.8908	2552-47-8	73416.6	91430.6	36091.3	218747	161722	245703	1.32037	0.0124704	0.0991073	0.3209	-1.63981	down	C09609	-
MEDL01737	5-Aminoimidazole ribonucleotide	5-氨基咪唑核糖核苷酸	Nucleotides and derivatives	核苷酸及其衍生物	Nucleotides and derivatives	核苷酸及其衍生物	C8H14N3O7P	3	0.8858	25635-88-5	21038.6	37702.2	41352.5	108268	101778	54639.7	1.2351	0.0690473	0.211982	0.378159	-1.40293	down	C03373	ko00230,ko00730,ko00860,ko01100,ko01110,ko01240
MW0112925	3'-Sialyllactosamine	3'-唾液酸乳糖胺	Alcohol and amines	醇、胺类	Amines	胺类	C23H40N2O18	3	0.8825	126151-66-4	656.75	5641.64	1888.23	53992.3	39729.7	35975.7	1.36161	0.013036	0.100753	0.0631208	-3.98574	down	-	-
MW0147060	(1S,2R)-7-hydroxy-1-(4-hydroxy-3-methoxyphenyl)-2-N,3-N-bis[2-(4-hydroxyphenyl)ethyl]-6-methoxy-1,2-dihydronaphthalene-2,3-dicarboxamide	大麻酰胺 D	Alkaloids	生物碱	Alkaloids	生物碱	C36H36N2O8	3	0.8678	144506-19-4	746459	533538	576626	273168	280681	363550	1.36445	0.0257527	0.133065	2.02379	1.01706	up	C17908	-
MEDP1295	Cytarabine	阿糖胞苷	Nucleotides and derivatives	核苷酸及其衍生物	Nucleotides and derivatives	核苷酸及其衍生物	C9H13N3O5	3	0.8669	147-94-4	32059.5	30171.8	47441.5	18668.3	18574.3	12756.6	1.32863	0.0547675	0.188073	2.19349	1.13323	up	C02961	-
MW0137959	Dihydrodaidzein	二氢黄豆苷元	Flavonoids	黄酮	Isoflavones	异黄酮	C15H12O4	3	0.86	17238-05-0	14903.1	20982.2	25409.4	6959.22	5518.34	9587.83	1.34214	0.0364511	0.154716	2.77786	1.47398	up	-	-
MEDN1026	Biosone	次甘草酸(β型)	Terpenoids	萜类	Triterpene	三萜	C30H46O4	3	0.8569	471-53-4	179627	191104	765988	47054.5	62200.7	96186.3	1.22762	0.249535	0.422009	5.53306	2.46808	up	C02283	-
MW0118238	2-Amino-1,4-dihydro-4-oxopteridine-7-carboxylic acid	2-氨基-1,4-二氢-4-氧代蝶啶-7-羧酸	Heterocyclic compounds	杂环化合物	Pteridines and derivatives	蝶啶及其衍生物	C7H5N5O3	3	0.8541	31010-60-3	15516.4	11391.1	13583.4	71751.4	59090.8	55493.8	1.44342	0.00739771	0.0849638	0.217301	-2.20223	down	-	-
MEDL02220	Nicotine	烟碱	Alkaloids	生物碱	Pyridine alkaloids	吡啶类生物碱	C10H14N2	3	0.85	54-11-5	29904.3	68790.6	63481	212621	76452.8	102948	1.06953	0.201153	0.376118	0.41369	-1.27338	down	C00745	ko00760,ko00960,ko01100,ko01110
MEDP1683	Trileucine	亮氨酸-亮氨酸-亮氨酸	Amino acids and derivatives	氨基酸及其衍生物	Amino acids and derivatives	氨基酸及其衍生物	C18H35N3O4	3	0.8452	10329-75-6	42550.6	95283	224559	3357.81	12118.1	20952.6	1.25357	0.181181	0.356366	9.94806	3.31442	up	-	-
MW0113976	beta-CYCLODEXTRIN	β-环糊精	Others	其它类	Saccharides	糖类	C42H70O35	3	0.8251	7585-39-9 | 37331-89-8 | 79647-56-6	36757.5	25522.2	30438.5	10831.9	11015.9	9093.23	1.43057	0.0209886	0.120379	2.99661	1.58333	up	-	-
MW0157470	Thalicarpine	唐松果碱	Alkaloids	生物碱	Alkaloids	生物碱	C41H48N2O8	3	0.822	5373-42-2	13752.1	12335.6	12591.8	33727.1	49276.5	13435.9	1.03346	0.204486	0.379197	0.401076	-1.31805	down	C09655	-
MEDP0205	Carnitine	肉碱	Alkaloids	生物碱	Alkaloids	生物碱	C7H15NO3	3	0.8122	406-76-8 | 461-06-3	111826	107931	106156	46944.1	45735.2	53566.3	1.44899	8.53478e-05	0.0264009	2.22853	1.15609	up	-	-
MEDP0603	4-Isopropylbenzaldehyde	4-异丙基苯甲醛	Others	其它类	Aldehyde compounds	醛类化合物	C10H12O	3	0.8121	122-03-2	60039	57871.4	54070.2	133163	126342	138133	1.45832	0.000304871	0.029247	0.432506	-1.20921	down	C06577	ko01100
MW0109774	Suberylglycine	亚芥酸甘氨酸	Amino acids and derivatives	氨基酸及其衍生物	Amino acids and derivatives	氨基酸及其衍生物	C10H17NO5	3	0.8105	60317-54-6	2.248e+06	2.30387e+06	2.14689e+06	1.02e+06	968183	1.04063e+06	1.45489	0.000226047	0.0275633	2.21168	1.14514	up	-	-
MEDP1839	3,4-Dimethoxybenzaldehyde	藜芦醛	Phenolic acids	酚酸类	Phenolic acids	酚酸类	C9H10O3	3	0.8025	120-14-9	166748	175581	159244	442592	405843	402034	1.45951	0.000969831	0.042453	0.401109	-1.31794	down	C02201	-
MEDP0022	L-Proline	L-脯氨酸	Amino acids and derivatives	氨基酸及其衍生物	Amino acids and derivatives	氨基酸及其衍生物	C5H9NO2	3	0.7998	147-85-3	116374	180595	96377.2	49230.5	53045.3	55822.8	1.32659	0.0900522	0.241987	2.48798	1.31498	up	C00148	ko00330,ko00332,ko00470,ko00970,ko01100,ko01110,ko01230,ko02010
MW0009918	Thonzylamine	消苄胺	Phenolic acids	酚酸类	Phenolic acids	酚酸类	C16H22N4O	3	0.7858	91-85-0	100205	73915.2	51823.4	10771.7	26265.8	41293	1.16636	0.0506994	0.18068	2.88449	1.52832	up	-	-
MEDN0060	N-Isovaleroylglycine	N-异戊酰氨基乙酸	Amino acids and derivatives	氨基酸及其衍生物	Amino acids and derivatives	氨基酸及其衍生物	C7H13NO3	3	0.7767	16284-60-9	16896.6	16996.9	25805.8	5910.74	2892.3	3366.45	1.39491	0.0244369	0.129324	4.90565	2.29444	up	-	-
MW0157343	Tarennoside	塔伦诺苷	Terpenoids	萜类	Terpene	萜类	C16H22O9	3	0.7756	61081-59-2	15624.1	14651.7	17790.3	46385.2	32885.3	36200.5	1.40985	0.0262574	0.134098	0.416261	-1.26444	down	C11654	-
MW0114510	Gastrodin	天麻素	Phenolic acids	酚酸类	Phenolic acids	酚酸类	C13H18O7	3	0.7754	62499-27-8	9910.28	12594.5	4660.86	112.59	3074.49	641.37	1.16495	0.0640233	0.203054	7.09572	2.82695	up	C16964	-
MEDL01846	Dihydroferulic acid	二氢阿魏酸	Organic acids	有机酸	Organic acids	有机酸	C10H12O4	3	0.7728	1135-23-5	71833.8	40257.3	41898.1	118418	131953	142236	1.35664	0.0046913	0.0721689	0.392223	-1.35025	down	-	-
MEDL02393	N-Methylnicotinamide	N-甲基烟酰胺	Alkaloids	生物碱	Pyridine alkaloids	吡啶类生物碱	C7H8N2O	3	0.7728	114-33-0	1.24784e+06	1.2762e+06	1.23692e+06	535803	567200	547403	1.46026	2.19005e-06	0.00508092	2.27881	1.18828	up	-	-
MW0002036	2-(Methylamino)benzoic acid	N-邻氨基苯甲酸甲酯	Benzene and substituted derivatives	苯及其衍生物	Benzene and substituted derivatives	苯及其衍生物	C8H9NO2	3	0.7694	119-68-6	8159.51	6674.42	3705.16	19670.5	17336.1	18119.4	1.36152	0.00363445	0.0672043	0.336305	-1.57216	down	C03005	ko00996,ko01110
MEDP1315	Quinoline	喹啉	Alkaloids	生物碱	Quinoline alkaloids	喹啉类生物碱	C9H7N	3	0.7659	91-22-5	6554.41	15225.6	10059.1	24696	63994.8	23489.6	1.20991	0.177999	0.352955	0.283821	-1.81695	down	C06413	-
MW0053614	Ginsenoside Ra1	人参皂甙Ra1	Terpenoids	萜类	Triterpene Saponin	三萜皂苷	C58H98O26	3	0.7651	83459-41-0	749506	518799	774097	269724	343534	322446	1.37994	0.0376475	0.156573	2.18274	1.12614	up	-	-
MW0116592	1,2-Diacetoxy-4,7,8-trihydroxy-3-(4-hydroxyphenyl)dibenzofuran	1,2-二乙酰氧基-4,7,8-三羟基-3-(4-羟基苯基)二苯并呋喃	Benzene and substituted derivatives	苯及其衍生物	Benzene and substituted derivatives	苯及其衍生物	C22H16O9	3	0.7635	146905-24-0	35482.2	38028.6	59581.7	111373	111526	61061.2	1.1892	0.0781059	0.224542	0.468702	-1.09326	down	-	-
MEDN0052	N6-Acetyl-L-lysine	N6-乙酰-L-赖氨酸	Amino acids and derivatives	氨基酸及其衍生物	Amino acids and derivatives	氨基酸及其衍生物	C8H16N2O3	3	0.76	692-04-6	159677	65308	180898	3791.15	9242.84	10549.7	1.40377	0.0692081	0.211982	17.2103	4.1052	up	C02727	ko00310,ko01100
MEDN0037	Dopamine	多巴胺	Alkaloids	生物碱	Phenolamine	酚胺	C8H11NO2	3	0.76	62-31-7	62691.9	79498.7	79904.4	33919	38687.1	29255.5	1.40651	0.00888204	0.091316	2.18036	1.12457	up	C03758	ko00350,ko00950,ko00965,ko01100,ko01110
MW0015543	Acetyl-L-carnitine	乙酰左旋肉碱	Alkaloids	生物碱	Alkaloids	生物碱	C9H17NO4	3	0.7595	3040-38-8 | 14992-62-2	22565.9	21090.2	22720.9	33731.5	69088.7	78067.6	1.26857	0.105854	0.262493	0.366951	-1.44634	down	C02571	-
MEDP0777	Diethyl malonate	丙二酸二乙酯	Organic acids	有机酸	Organic acids	有机酸	C7H12O4	3	0.7491	105-53-3	4840.26	4863.69	10665.8	30081.1	28151.6	25643.9	1.36354	0.00152317	0.0494223	0.242853	-2.04184	down	-	-
MW0001791	1H-Benz(de)isoquinoline-1,3(2H)-dione, 2-(2-hydroxyethyl)-5-nitro-	1H-Benz(de)isoquinoline-1,3(2H)-dione, 2-(2-hydroxyethyl)-5-nitro-	Benzene and substituted derivatives	苯及其衍生物	Benzene and substituted derivatives	苯及其衍生物	C14H10N2O5	3	0.7482	79070-65-8	10667.1	15924.7	8303.21	142233	38806	85551.2	1.35403	0.122077	0.284785	0.130893	-2.93353	down	-	-
MW0001255	Squoxin	Squoxin	Benzene and substituted derivatives	苯及其衍生物	Benzene and substituted derivatives	苯及其衍生物	C21H16O2	3	0.7481	1096-84-0	659.22	976.64	594.18	2108.84	1318.92	3535.88	1.27029	0.131291	0.29611	0.320241	-1.64277	down	-	-
MEDL00722	Fumaric acid	富马酸盐	Organic acids	有机酸	Organic acids	有机酸	C4H4O4	3	0.7474	110-17-8	16396.2	20217	7494.5	4794.94	8960.71	3664.86	1.08634	0.128103	0.292251	2.53194	1.34024	up	C00122	ko00020,ko00190,ko00220,ko00250,ko00350,ko00360,ko00620,ko00650,ko00760,ko01100,ko01110,ko01200
MW0104179	(5,6,7-Triacetyloxy-2,2-dimethyl-3a,4,5,6,7,7a-hexahydro-1,3-benzodioxol-4-yl) acetate	(5,6,7-Triacetyloxy-2,2-dimethyl-3a,4,5,6,7,7a-hexahydro-1,3-benzodioxol-4-yl) 乙酸酯	Organic acids	有机酸	Organic acids	有机酸	C17H24O10	3	0.7467	26276-98-2	6700.67	4270.04	10943.9	16358.3	24176.5	12878	1.16981	0.0674457	0.210084	0.410287	-1.28529	down	-	-
MEDL02309	Inosinic acid	肌苷5'-单磷酸	Nucleotides and derivatives	核苷酸及其衍生物	Nucleotides and derivatives	核苷酸及其衍生物	C10H13N4O8P	3	0.7451	131-99-7 | 30918-54-8 | 25249-22-3	89107.4	64782.9	82840.9	33149	27629.8	24694.6	1.42102	0.0130501	0.100753	2.76965	1.4697	up	C00130	ko00230,ko01100,ko01110,ko01232,ko01240
MW0111446	Decarboxytiaprofenic acid	脱羧基苯丙酸	Others	其它类	Ketone compounds	酮类化合物	C13H12OS	3	0.7429	6933-26-2	2398.27	1756.56	1590.97	8365.97	5954.38	5069.52	1.39802	0.0371919	0.156344	0.29633	-1.75472	down	-	-
MW0002002	2-(Benzylamino)cyclohepta-2,4,6-triene-1-thione	2-(苄氨基)环庚-2,4,6-三烯-1-硫酮	Benzene and substituted derivatives	苯及其衍生物	Benzene and substituted derivatives	苯及其衍生物	C14H13NS	3	0.742	3336-61-6	591.37	518.66	231.43	1460.06	963.79	1266.73	1.27908	0.0145007	0.105625	0.363482	-1.46004	down	-	-
MEDP1831	Ethyl acetoacetate	乙酰乙酸乙酯	Others	其它类	Lactones	内酯类化合物	C6H10O3	3	0.7419	141-97-9	15233.2	18867.8	12833.3	48865.8	41844.9	37126.5	1.42123	0.00598113	0.0788422	0.367142	-1.44559	down	C03500	-
MW0125634	N-Allyl-N'-(4H-1,2,4-triazol-3-yl)thiourea	N-Allyl-N'-(4H-1,2,4-triazol-3-yl)thiourea	Heterocyclic compounds	杂环化合物	Heterocyclic compounds	杂环化合物	C6H9N5S	3	0.7417	55424-87-8	18697	23451	21391.8	11445.6	15268	4484.52	1.085	0.0589592	0.19416	2.03665	1.0262	up	-	-
MW0123924	Ethyl 2-[(cyanoacetyl)amino]-4,5,6,7-tetrahydro-1-benzothiophene-3-carboxylate	2-[(氰基乙酰基)氨基]-4,5,6,7-四氢-1-苯并噻吩-3-甲酸乙酯	Benzene and substituted derivatives	苯及其衍生物	Benzene and substituted derivatives	苯及其衍生物	C14H16N2O3S	3	0.7399	380467-91-4	5026.93	8307.56	10932.1	15945.2	15380.5	18156.9	1.23746	0.0227788	0.125655	0.490407	-1.02795	down	-	-
MEDP1427	Carnitine C8:0(Octanoylcarnitine)	肉碱 C8:0	FA	脂肪酰类	CAR	酰基肉碱	C15H29NO4	3	0.7386	25243-95-2	73692.6	65524	70383.8	198665	247007	288286	1.43561	0.0205277	0.118789	0.285575	-1.80806	down	-	-
MW0153395	7,8,19,20-Tetrahydro-15,18-etheno-2,6:9,13-dimetheno-1,14-benzodioxacyclodocosin-11,12,24-triol	7,8,19,20-Tetrahydro-15,18-etheno-2,6:9,13-dimetheno-1,14-benzodioxacyclodocosin-11,12,24-triol	Others	其它类	Ketone compounds	酮类化合物	C28H24O5	3	0.7382	88418-46-6	36648.3	39111.9	30033.5	55328.9	95463.9	60947	1.27974	0.1004	0.256308	0.49964	-1.00104	down	-	-
MW0010239	Colchicine	秋水仙碱	Alkaloids	生物碱	Alkaloids	生物碱	C22H25NO6	3	0.7364	64-86-8 | 30512-31-3	1.09143e+06	1.3885e+06	1.16696e+06	402083	458021	392021	1.44087	0.00937291	0.0927299	2.91255	1.54229	up	C07592	ko00950,ko01110
MW0126230	Primaquine phosphate	磷酸伯氨喹	Organic acids	有机酸	Organic acids	有机酸	C15H27N3O9P2	3	0.7363	63-45-6	4339.57	2611.53	1418.48	1301.69	916.98	1584.02	1.00722	0.210231	0.385563	2.20096	1.13813	up	-	-
MW0015129	7,8-Dihydro-3b,6a-dihydroxy-alpha-ionol 9-[apiosyl-(1->6)-glucoside]	7,8-Dihydro-3b,6a-dihydroxy-alpha-ionol 9-[apiosyl-(1->6)-glucoside]	Others	其它类	Saccharides	糖类	C24H42O12	3	0.7325	177261-73-3	26753.5	4282.71	15513.7	1630.81	3487.4	977.09	1.22367	0.171592	0.345912	7.63701	2.93301	up	-	-
MW0000043	10-Hydroxycamptothecin	10-羟基喜树碱	Alkaloids	生物碱	Quinoline alkaloids	喹啉类生物碱	C20H16N2O5	3	0.7319	19685-09-7	15444.1	24964.7	24179.3	63773.5	55770.2	52912.2	1.38974	0.00130544	0.0494223	0.37452	-1.41689	down	C17939	-
MW0111377	(1-Hydroxycyclohexyl)acetic acid	(1-羟基环己基)乙酸	Organic acids	有机酸	Organic acids	有机酸	C8H14O3	3	0.7319	14399-63-4	6614.14	6084.64	6282.16	20476.9	22334	17200	1.44613	0.0111856	0.0965916	0.316291	-1.66068	down	-	-
MEDP0128	Diethanolamine	二乙醇胺	Alkaloids	生物碱	Alkaloids	生物碱	C4H11NO2	3	0.7296	111-42-2	311560	368548	260036	736471	581541	617281	1.39907	0.00631	0.080398	0.485789	-1.0416	down	C06772	ko00564
MW0006646	Conivaptan	康尼伐坦	Benzene and substituted derivatives	苯及其衍生物	Benzene and substituted derivatives	苯及其衍生物	C32H26N4O2	3	0.7292	210101-16-9	5709.03	8108.38	5320.3	17469	13189	11148.5	1.33624	0.0383028	0.157653	0.457769	-1.12731	down	-	-
MW0125396	N-(4-aminophenyl)-N-methyl-2-(4-methylpiperazin-1-yl)acetamide	N-(4-氨基苯基)-N-甲基-2-(4-甲基哌嗪-1-基)乙酰胺	Alcohol and amines	醇、胺类	Amines	胺类	C14H22N4O	3	0.7279	262368-30-9	6543.27	5685.13	2740.61	22412.7	15040.5	6759	1.12602	0.157115	0.329491	0.338572	-1.56247	down	-	-
MEDL02383	Ethyl gallate	没食子酸乙酯	Phenolic acids	酚酸类	Phenolic acids	酚酸类	C9H10O5	3	0.7276	831-61-8	19977.9	35197.1	13496.2	2204.37	2486.99	3703.61	1.38498	0.0882542	0.239613	8.18004	3.03211	up	-	-
MEDP1585	Alanine glutamate	丙氨酸-谷氨酸	Amino acids and derivatives	氨基酸及其衍生物	Amino acids and derivatives	氨基酸及其衍生物	C8H14N2O5	3	0.7265	13187-90-1	30076.8	26100.2	50512.2	83324.8	65694.1	94307.6	1.27698	0.0158035	0.108336	0.438461	-1.18948	down	-	-
MEDP1904	1-(9Z,12Z-octadecadienoyl)-glycero-3-phosphoethanolamine	LPE(18:2/0:0)	GP	甘油磷脂类	LPE	溶血磷脂酰乙醇胺	C23H44NO7P	3	0.7252	85046-18-0	542793	566365	519073	149182	153550	388234	1.22011	0.0545442	0.187961	2.35646	1.23662	up	-	-
MW0123420	coproporphyrinogen III	卟啉原	Heterocyclic compounds	杂环化合物	Heterocyclic compounds	杂环化合物	C36H44N4O8	3	0.724	2624-63-7	7267.56	30045	17227.3	116986	103430	119465	1.35446	0.000480327	0.0341033	0.160468	-2.63964	down	C03263	ko00860,ko01100,ko01110,ko01240
MEDP0156	5-Methyluridine	5-甲基尿苷	Nucleotides and derivatives	核苷酸及其衍生物	Nucleotides and derivatives	核苷酸及其衍生物	C10H14N2O6	3	0.7224	1463-10-1	15423.7	10634.9	21110.1	6886.84	6098.34	6164.45	1.34117	0.0899636	0.241987	2.46317	1.30051	up	-	-
MW0009758	Sotalol	索他洛尔	Benzene and substituted derivatives	苯及其衍生物	Benzene and substituted derivatives	苯及其衍生物	C12H20N2O3S	3	0.7219	3930-20-9	14984.3	8183.26	7130.79	1075.16	857.32	1955.16	1.38636	0.0675074	0.210084	7.79351	2.96227	up	C07309	-
MW0054350	Ligstroside	Ligstroside	Terpenoids	萜类	Monoterpenoids	倍萜	C25H32O12	3	0.7211	35897-92-8	2317.29	3400	3418.23	15648.6	7698.44	11476.2	1.37612	0.0616429	0.198291	0.26234	-1.93049	down	-	-
MEDP0065	N-Acetyl-L-glutamic acid	N-乙酰-L-谷氨酸	Amino acids and derivatives	氨基酸及其衍生物	Amino acids and derivatives	氨基酸及其衍生物	C7H11NO5	3	0.721	1188-37-0	8145.82	6446.69	6044.09	14551.2	10468.9	18396.9	1.30744	0.070646	0.214527	0.475312	-1.07305	down	C00624	ko00220,ko00470,ko01100,ko01110,ko01210,ko01230
MW0011890	1,2-Dimyristoyl-sn-glycero-3-(phospho-rac-(1-glycerol))	1,2-二肉豆蔻酰-sn-glycero-3-(phospho-rac-(1-glycerol))	GP	甘油磷脂类	PG	磷脂酰甘油	C34H67O10P	3	0.7204	185463-23-4	138307	120129	134785	71327.5	56147	64293.2	1.42609	0.000890841	0.0422072	2.0505	1.03598	up	-	-
MEDL00355	Glu-Tyr	谷氨酸-酪氨酸	Amino acids and derivatives	氨基酸及其衍生物	Amino acids and derivatives	氨基酸及其衍生物	C14H18N2O6	3	0.7189	3422-39-7	1641.88	4523.43	5355.27	12573.2	7351.47	7012.39	1.09085	0.0849675	0.234254	0.427686	-1.22538	down	-	-
MEDL02157	Coniferin	松柏苷	Phenolic acids	酚酸类	Phenolic acids	酚酸类	C16H22O8	3	0.7178	124151-33-3	190360	187808	145532	558189	594759	562688	1.45076	4.18309e-05	0.0181342	0.305251	-1.71193	down	C00761	ko00940,ko01110
MEDP0821	6-Methylnicotinamide	6-甲基烟酰胺	Alkaloids	生物碱	Pyridine alkaloids	吡啶类生物碱	C7H8N2O	3	0.7178	6960-22-1	328269	227994	127874	35026	79448.3	109190	1.15907	0.103903	0.259761	3.05877	1.61295	up	-	-
MEDL01914	2,6-Dihydroxybenzoic acid	2,6-二羟基苯甲酸	Benzene and substituted derivatives	苯及其衍生物	Benzene and substituted derivatives	苯及其衍生物	C7H6O4	3	0.7176	303-07-1	20589.6	21888.8	13948.9	2415.08	1934.16	16374.6	1.05541	0.111787	0.271193	2.72282	1.4451	up	-	-
MW0063351	Methyl ricinoleate	蓖麻油酸甲酯	FA	脂肪酰类	Others	其它	C19H36O3	3	0.7165	141-24-2 | 41989-07-5	255602	163341	137069	85956.8	53285.8	76669.9	1.2947	0.0786028	0.225458	2.57517	1.36467	up	-	-
MEDN1199	4-Hydroxyphenylglyoxylic acid	4-羟基苯乙醛酸	Benzene and substituted derivatives	苯及其衍生物	Benzene and substituted derivatives	苯及其衍生物	C8H6O4	3	0.7134	15573-67-8	10511.1	16321.6	5402.55	22215.3	36364.1	30623.5	1.24688	0.0240116	0.129067	0.36137	-1.46845	down	C03590	ko00261,ko01100,ko01110
MW0127231	2-Methyl-6-(furfurylthio)pyrazine	2-甲基-6-(糠硫基)吡嗪	Heterocyclic compounds	杂环化合物	Heterocyclic compounds	杂环化合物	C10H10N2OS	3	0.7129	59021-05-5	46502.1	51981	49371.6	129089	132766	122274	1.45757	0.000189104	0.0273488	0.384909	-1.37741	down	-	-
MW0137820	Cyanidin 3-rhamnoside 5-glucoside	花青素 3-鼠李糖苷 5-葡萄糖苷	Flavonoids	黄酮	Anthocyanidins	花青素	C27H31O15+	3	0.7105	53859-12-4	1.74323e+06	2.22467e+06	876190	475509	545492	985302	1.10472	0.124967	0.288484	2.41444	1.27169	up	-	-
MW0000074	2-Sulfamoylacetylphenol	2-磺基乙酰苯酚	Phenolic acids	酚酸类	Phenolic acids	酚酸类	C8H9NO4S	3	0.7104	74538-97-9	11050.4	12949	6065.36	5896.31	2402.01	5946.13	1.01954	0.106879	0.264407	2.11063	1.07767	up	-	-
MW0001955	2-(Morpholin-4-yl)ethyl 2,4-dihydroxybenzoate	2-(吗啉-4-基)2,4-二羟基苯甲酸乙酯	Benzene and substituted derivatives	苯及其衍生物	Benzene and substituted derivatives	苯及其衍生物	C13H17NO5	3	0.7097	84139-72-0	105696	86311.4	115034	21300.3	23539.1	27498.5	1.44968	0.00905486	0.091316	4.24455	2.08561	up	-	-
MW0124205	Gambogic acid	藤黄酸	Organic acids	有机酸	Organic acids	有机酸	C38H44O8	3	0.7082	2752-65-0	13216.6	15937.9	7248.37	2320.86	2247.33	5107.93	1.27682	0.0600261	0.195803	3.76214	1.91155	up	-	-
MEDN0746	Butylparaben	对羟基苯甲酸丁酯	Phenolic acids	酚酸类	Phenolic acids	酚酸类	C11H14O3	3	0.7078	94-26-8	5733.71	4865.47	4217.14	8654.55	14848.7	7739.98	1.24116	0.128853	0.293365	0.474224	-1.07636	down	-	-
MEDL00860	D-Ornithine	D-鸟氨酸	Amino acids and derivatives	氨基酸及其衍生物	Amino acids and derivatives	氨基酸及其衍生物	C5H12N2O2	3	0.7074	348-66-3	5630.29	13541.4	6273.95	47138.3	15723.6	17487.8	1.15616	0.209522	0.384566	0.316686	-1.65888	down	C00515	ko00470,ko01100,ko01110
MEDP0677	1-Butylamine	丁胺	Alkaloids	生物碱	Alkaloids	生物碱	C4H11N	3	0.7053	109-73-9	22494	21977.5	32369.6	12475.1	12201.6	8647.96	1.36206	0.0377486	0.156573	2.30583	1.20529	up	-	-
MW0001328	1,3-Bis(2-methoxyphenyl)thiourea	1,3-双(2-甲氧基苯基)硫脲	Benzene and substituted derivatives	苯及其衍生物	Benzene and substituted derivatives	苯及其衍生物	C15H16N2O2S	3	0.7052	1226-64-8	2856.51	3974.98	3510.09	1456.52	1337.79	1652.81	1.40637	0.0197986	0.11753	2.32546	1.21751	up	-	-
MEDP1645	Benzamide	苯甲酰胺	Phenolic acids	酚酸类	Phenolic acids	酚酸类	C7H7NO	3	0.7046	55-21-0	59193.9	56186.4	80239.4	35355	29786.8	29014.9	1.38885	0.039121	0.159463	2.0776	1.05492	up	C09815	-
MW0146675	beta-Hydroxyacteoside	β-羟基毛蕊糖苷	Phenolic acids	酚酸类	Phenolic acids	酚酸类	C29H36O16	3	0.7005	95587-86-3	9646.57	4190.46	3650.46	21998.1	23356.1	9831.51	1.20007	0.0826447	0.230493	0.316884	-1.65797	down	C17528	-
MW0117282	Tert-butyl 2-oxopiperidine-1-carboxylate	2-氧代哌啶-1-羧酸叔丁酯	Organic acids	有机酸	Organic acids	有机酸	C10H17NO3	3	0.7	85908-96-9	21554.1	12361.1	14551.3	1128.2	4009.06	3180.18	1.33887	0.0312901	0.145477	5.82709	2.54278	up	-	-
MW0110745	2-Hexadecanoylthio-1-ethylphosphorylcholine	2-十六烷基硫代-1-乙基磷酰胆碱	Organic acids	有机酸	Organic acids	有机酸	C23H48NO5PS	3	0.6973	60793-01-3	17492	14100.8	17778.1	6035.83	6942.25	10223.1	1.34064	0.00746076	0.0851808	2.12795	1.08946	up	-	-
MEDL02667	Perlolyrine	黑麦草碱	Alkaloids	生物碱	Plumerane	吲哚类生物碱	C16H12N2O2	3	0.6958	29700-20-7	19486.8	29066.4	10247.1	36658.8	41020.9	78154.5	1.18085	0.119006	0.280704	0.377326	-1.40612	down	C09231	-
MW0108971	O-benzyl-L-serine	邻苄基-1-丝氨酸	Amino acids and derivatives	氨基酸及其衍生物	Amino acids and derivatives	氨基酸及其衍生物	C10H13NO3	3	0.692	4726-96-9 | 30916-68-8	12000	13076.4	22231.3	35027.2	36389.9	23327.1	1.19649	0.0427793	0.167561	0.49932	-1.00196	down	-	-
MW0115788	tert-Butyl 1H-indol-4-ylcarbamate	（1H-吲哚-4-基)-氨基甲酸叔丁酯	Organic acids	有机酸	Organic acids	有机酸	C13H16N2O2	3	0.6919	819850-13-0	17174.7	33661.2	33608.2	74863.4	41967.8	53596.3	1.159	0.0768431	0.223341	0.495483	-1.01309	down	-	-
MEDN0025	3-Hydroxymethylglutaric acid	3-羟基-3-甲基谷氨酸	Amino acids and derivatives	氨基酸及其衍生物	Amino acids and derivatives	氨基酸及其衍生物	C6H10O5	3	0.6913	503-49-1	54977.5	85576.6	13592.8	98847.4	165897	148175	1.08458	0.0407871	0.16295	0.37331	-1.42155	down	C03761	-
MW0052353	Digoxigenin	异羟基洋地黄毒苷元	Steroids	甾体	Cardiac glycoside	强心苷	C23H34O5	3	0.6902	1672-46-4	86737.5	72793	239169	48957.5	54184.7	56092.1	1.08091	0.272753	0.443851	2.50386	1.32415	up	-	-
MW0054635	Mabioside D	马比奥苷D	Terpenoids	萜类	Triterpene	三萜	C42H70O14	3	0.6901	156980-55-1	41831.5	51607.9	39969.5	28926	16598.3	14883	1.2795	0.0141718	0.104574	2.20849	1.14306	up	-	-
MW0016412	Carvone	香芹酮	Others	其它类	Ketone compounds	酮类化合物	C10H14O	3	0.6899	22327-39-5	24231.5	22994.5	26776.6	47838	57255.3	52787.1	1.43125	0.00401842	0.069314	0.468726	-1.09318	down	-	-
MW0049137	Cynarasaponin D	洋蓟皂苷D	Steroids	甾体	Steroid	甾体	C47H74O19	3	0.6895	117804-10-1	375.09	1744.08	2487.02	3524.9	4882.98	5260.61	1.08561	0.0214481	0.121419	0.336993	-1.56921	down	-	-
MW0012407	15(S)-Hede	15(S)-Hede	Lipids	脂质	Free fatty acids	游离脂肪酸	C20H36O3	3	0.6874	92693-04-4	6759.52	3830.7	3909.08	15915.7	71506	35797.9	1.31522	0.155218	0.327517	0.11767	-3.08718	down	-	-
MEDL01854	Demethoxycurcumin	去甲氧基姜黄素	Phenolic acids	酚酸类	Phenolic acids	酚酸类	C20H18O5	3	0.6859	22608-11-3	150017	117921	231580	69098.2	80769.1	78149.9	1.30607	0.114392	0.274164	2.19071	1.1314	up	-	-
MW0147491	Cinegalline	西内加林	Alkaloids	生物碱	Alkaloids	生物碱	C23H30N2O6	3	0.6857	20772-38-7	3356.68	5277.54	4742.63	10742.8	12050.5	12211.6	1.40434	0.000749449	0.0392989	0.382143	-1.38782	down	C10762	-
MW0007780	Methyl 2-hydroxybenzoate	2-羟基苯甲酸甲酯	Benzene and substituted derivatives	苯及其衍生物	Benzene and substituted derivatives	苯及其衍生物	C8H8O3	3	0.6851	119-36-8	84902.1	87446.3	60534.4	324737	305440	284462	1.44605	0.000165339	0.0273488	0.254617	-1.9736	down	C12305	-
MW0114715	Leiocarposide	光果糖苷	Benzene and substituted derivatives	苯及其衍生物	Benzene and substituted derivatives	苯及其衍生物	C27H34O16	3	0.6836	71953-77-0	165087	135292	236965	691605	712527	355404	1.30586	0.0638186	0.202889	0.305389	-1.71128	down	-	-
MEDL01814	Batatasin I	山药素 I	Phenolic acids	酚酸类	Phenolic acids	酚酸类	C17H16O4	3	0.6835	51415-00-0	11210.1	16942.4	14903.5	44257.4	27303	45460.4	1.35705	0.0433058	0.168432	0.367935	-1.44248	down	C10246	-
MW0000024	Gnoscopine	诺斯卡品	Alkaloids	生物碱	Isoquinoline alkaloids	异喹啉类生物碱	C22H23NO7	3	0.6828	6035-40-1	158510	5209.64	80889.7	6771.67	3688.9	3807.19	1.06676	0.224836	0.3998	17.1442	4.09965	up	-	-
ZINC85529959	Methoxyadiantifoline	甲氧基二反式叶林	Alkaloids	生物碱	Alkaloids	生物碱	C43H52N2O10	3	0.682	115452-09-0	59652.7	71562.6	49103	6572.18	4696.49	8118.83	1.43492	0.0127829	0.10036	9.30075	3.21735	up	-	-
MW0156453	Ryanodine	瑞安定	Terpenoids	萜类	Ditepenoids	二萜	C25H35NO9	3	0.6808	15662-33-6	341803	538488	550085	178781	98621.3	261908	1.23276	0.0274112	0.137352	2.65223	1.40721	up	-	-
MW0007582	Menadione	维生素K3	Others	其它类	Vitamin	维生素	C11H8O2	3	0.6795	58-27-5	12458.6	12500.9	15011.8	35232.6	41668.1	24446.4	1.3631	0.0517923	0.182387	0.394399	-1.34227	down	C05377	-
MW0169215	Geniposide	京尼平苷	Terpenoids	萜类	Monoterpenoids	倍萜	C17H24O10	3	0.6786	24512-63-8 | 169799-41-1 | 27745-20-6	19922.2	35639.6	18199.8	74875.6	87298.1	66799.7	1.3769	0.00320113	0.0665633	0.32214	-1.63424	down	C09781	-
MW0126367	Queuine	奎因	Alkaloids	生物碱	Alkaloids	生物碱	C12H15N5O3	3	0.6777	72496-59-4 | 69565-92-0	33091.3	28771.3	23998.5	59928.1	63986.7	115831	1.33132	0.101236	0.257388	0.358134	-1.48143	down	C01449	-
MW0015702	alpha-Hederin	3-O-鼠李糖基(1→2)阿拉伯糖基-23-羟基齐墩果-12-烯-28-酸 (木通皂苷Stc;刺楸根皂苷A;无患子皂苷A)	Terpenoids	萜类	Triterpene Saponin	三萜皂苷	C41H66O12	3	0.6765	27013-91-8 | 104748-88-1	79083	64022.3	80970.6	28645.9	20552.2	46232.7	1.28422	0.0126605	0.0999376	2.34805	1.23146	up	C08954	-
MW0055314	CID 14021529	尼罗河金银楝素	Terpenoids	萜类	Triterpene	三萜	C30H48O3	3	0.6758	115404-57-4	23637.9	35236.1	23481	45096.5	368598	155856	1.15454	0.229078	0.40446	0.144596	-2.7899	down	-	-
MW0158046	Trichotomine	曲索明	Benzene and substituted derivatives	苯及其衍生物	Benzene and substituted derivatives	苯及其衍生物	C30H20N4O6	3	0.6756	53472-14-3	4115.31	3065.5	2819.52	16629.1	8505	15144.8	1.38701	0.0529101	0.184173	0.248277	-2.00998	down	C09247	-
MW0108476	N-Phenylacetylphenylalanine	N-(苯乙酰基)-L-苯丙氨酸	Amino acids and derivatives	氨基酸及其衍生物	Amino acids and derivatives	氨基酸及其衍生物	C17H17NO3	3	0.6732	738-75-0	11497.1	12349.2	23314.3	39436.9	28639.5	35999.9	1.24895	0.0198079	0.11753	0.453135	-1.14199	down	-	-
MW0137266	Acteoside	猕猴桃苷	Heterocyclic compounds	杂环化合物	Heterocyclic compounds	杂环化合物	C29H36O15	3	0.6716	61276-17-3 | 22323-52-0	25524.3	18755.1	17786.2	64592.7	51826.3	53520.7	1.41908	0.00325665	0.0665633	0.365222	-1.45316	down	-	-
MW0138459	Isobavachalcone	补骨脂乙素	Flavonoids	黄酮	Chalcones	查耳酮	C20H20O4	3	0.6706	20784-50-3 | 54676-49-2	6699.41	4134.01	5374.66	19148.6	11621	16308.5	1.36582	0.0320474	0.146792	0.344281	-1.53834	down	C08648	-
MEDP1391	O-linoleyl-L-carnitine	O-亚油基-L-肉碱	FA	脂肪酰类	CAR	酰基肉碱	C25H45NO4	3	0.6696	36816-10-1	124527	124617	74252.1	264065	217493	272946	1.36038	0.00393305	0.0686236	0.428621	-1.22222	down	-	-
MW0007914	1-(2,3-Dimethylphenyl)-3-phenylthiourea	1-(2,3-二甲基苯基)-3-苯基硫脲	Benzene and substituted derivatives	苯及其衍生物	Benzene and substituted derivatives	苯及其衍生物	C15H16N2S	3	0.6687	13528-13-7	7662.21	8156.46	6573.64	962.96	4211.37	3897.98	1.09758	0.0339606	0.150503	2.4682	1.30346	up	-	-
MEDL02737	Goyaglycoside f	Goyaglycoside F	Terpenoids	萜类	Triterpene Saponin	三萜皂苷	C42H68O13	3	0.6663	333333-13-4	153552	157163	134605	58551.6	40088.3	48146.2	1.42288	0.00049979	0.0341033	3.0338	1.60113	up	-	-
MW0052770	Etretinate	依曲坦	Others	其它类	Lactones	内酯类化合物	C23H30O3	3	0.6643	54350-48-0	5451.45	5348.24	15809	2835.45	1337	3255.55	1.18263	0.204051	0.379174	3.58222	1.84085	up	-	-
MW0147204	Carnosifloside III	卡诺西弗苷III	Steroids	甾体	Steroid	甾体	C48H78O18	3	0.6634	109985-92-4	151870	153758	148970	46746.4	61364.5	80031.1	1.38424	0.0103497	0.094725	2.41625	1.27277	up	C08791	-
MW0129668	1,3-dihydroxy-7,8,9,10-tetrahydro-6H-benzo[c]chromen-6-one	1,3-二羟基-7,8,9,10-四氢-6H-苯并[c]chromen-6-one	Benzene and substituted derivatives	苯及其衍生物	Benzene and substituted derivatives	苯及其衍生物	C13H12O4	3	0.6615	3722-45-0	2468.3	2375.44	1933.37	5696.31	5380.97	3847.25	1.37815	0.033236	0.148713	0.454092	-1.13894	down	-	-
ZINC777954	Praeruptorin D	白花前胡素D	Lignans and Coumarins	木脂素和香豆素	Coumarins	香豆素	C24H26O7	3	0.6614	73069-28-0 | 81740-07-0	34946.6	36731	25106.5	16955.4	17289.3	12119.3	1.32124	0.0275068	0.137427	2.08748	1.06176	up	-	-
MEDP1242	4-tert-Butylbenzoic acid	4-叔丁基苯甲酸	Benzene and substituted derivatives	苯及其衍生物	Benzene and substituted derivatives	苯及其衍生物	C11H14O2	3	0.6611	98-73-7	22980.8	28365	18772.7	61358.7	51515.3	67480.9	1.41272	0.00497605	0.0742407	0.388781	-1.36297	down	-	-
MW0114621	Indican	靛苷	Alkaloids	生物碱	Plumerane	吲哚类生物碱	C14H17NO6	3	0.6589	487-60-5	20644.7	28943.5	15549.8	45934.9	71042.6	49370.9	1.33205	0.0323787	0.147258	0.391576	-1.35264	down	-	-
MW0014020	3-Deoxyfructose	3-脱氧果糖	Organic acids	有机酸	Organic acids	有机酸	C6H12O5	3	0.6571	6196-57-2	34174.9	25776.2	24203.2	11754.4	10152.9	6576.38	1.36826	0.0134824	0.102003	2.95448	1.5629	up	-	-
MW0014140	2-Hydroxy-3-isopropylsuccinic acid	3-异丙基苹果酸	Organic acids	有机酸	Organic acids	有机酸	C7H12O5	3	0.657	16048-89-8	12004.5	8113.14	8160.15	37328.7	34044.2	37054.2	1.43612	0.000114844	0.0273488	0.2608	-1.93898	down	-	-
MW0114976	Natamycin	游霉素	Others	其它类	Lactones	内酯类化合物	C33H47NO13	3	0.6569	7681-93-8	18655.1	19678.6	11137.1	5498.9	4406.4	2837.13	1.35079	0.0366938	0.155313	3.88236	1.95694	up	-	-
MW0148318	Desglucomusennin	去葡萄糖素	Organic acids	有机酸	Organic acids	有机酸	C45H72O16	3	0.6555	25314-45-8	65039.3	48824.7	73163.6	26055.2	14549.3	34336.2	1.26553	0.0166454	0.11145	2.49567	1.31943	up	C08940	-
MEDN1410	N-Palmitoylglycine	N-棕榈酰甘氨酸	Amino acids and derivatives	氨基酸及其衍生物	Amino acids and derivatives	氨基酸及其衍生物	C18H35NO3	3	0.6551	158305-64-7	1570.16	365.73	381.74	1591.16	1780.88	1317.2	1.01876	0.177301	0.352023	0.494244	-1.0167	down	-	-
MW0003537	3-(Diphenylphosphino)-1-propylamine	3-(二苯基膦)-1-丙胺	Benzene and substituted derivatives	苯及其衍生物	Benzene and substituted derivatives	苯及其衍生物	C15H18NP	3	0.655	16605-03-1	8021.93	9827.79	5097.39	30727.4	15835.8	12503.4	1.19945	0.158303	0.330421	0.388495	-1.36403	down	-	-
MW0126293	Pyrazinamide	吡嗪酰胺	Organic acids	有机酸	Organic acids	有机酸	C5H5N3O	3	0.6539	98-96-4	25742.5	33709.7	32278.7	9516.58	17326.4	9306.28	1.33678	0.00687672	0.0830155	2.53756	1.34344	up	C01956	-
MW0148172	N-Deacetylcolchicine	脱乙酰秋水仙碱；三甲基秋水仙酸甲醚	Alkaloids	生物碱	Alkaloids	生物碱	C20H23NO5	3	0.6535	3476-50-4	10270.2	10066.6	12984.6	31369.2	23337.1	22971	1.39256	0.0230966	0.126676	0.428972	-1.22105	down	-	-
MW0010059	Vialinin A	Vialinin A	Benzene and substituted derivatives	苯及其衍生物	Benzene and substituted derivatives	苯及其衍生物	C34H26O8	3	0.6532	858134-23-3	5703.79	10205.3	4103.92	1155.12	2970.4	1428.21	1.24373	0.107993	0.265196	3.60353	1.84941	up	-	-
MEDP0054	Glutamine	L-谷氨酰胺	Amino acids and derivatives	氨基酸及其衍生物	Amino acids and derivatives	氨基酸及其衍生物	C5H10N2O3	3	0.6511	56-85-9	10335.2	14725.9	8746.59	66251.8	63237.9	59345.2	1.44629	4.68988e-05	0.0181342	0.179033	-2.4817	down	C00064	ko00220,ko00230,ko00240,ko00250,ko00470,ko00630,ko00750,ko00910,ko00970,ko01100,ko01230,ko01232,ko01240,ko02010
MW0146894	(3S,8S,9R,10R,13R,14S,17R)-17-[(2R)-5,6-dihydroxy-6-methylheptan-2-yl]-3-hydroxy-4,4,9,13,14-pentamethyl-1,2,3,7,8,10,12,15,16,17-decahydrocyclopenta[a]phenanthren-11-one	苔藓豆甙元	Others	其它类	Ketone compounds	酮类化合物	C30H50O4	3	0.6493	4965-97-3	54898.6	53942.2	63116.9	16498.8	24288.2	16853	1.42768	0.000649128	0.0367312	2.9833	1.57691	up	C08789	-
MEDN1161	Quinolinic acid	喹啉酸	Alkaloids	生物碱	Pyridine alkaloids	吡啶类生物碱	C7H5NO4	3	0.6477	89-00-9	857.56	3050.51	1736.08	595.54	426.39	667.6	1.17851	0.172974	0.347446	3.34066	1.74013	up	C03722	ko00380,ko00410,ko00760,ko01100,ko01240
MW0126471	8-Demethyl-8-(dimethylamino)riboflavin	玫瑰黄素	Heterocyclic compounds	杂环化合物	Heterocyclic compounds	杂环化合物	C18H23N5O6	3	0.6471	51093-55-1	256811	207694	193118	76193.8	78494.6	115339	1.37628	0.00760131	0.0858153	2.4354	1.28416	up	C21647	ko01100,ko01110
Lmhp001461	Pro-leu	L-脯氨酰-L-亮氨酸	Amino acids and derivatives	氨基酸及其衍生物	Amino acids and derivatives	氨基酸及其衍生物	C11H20N2O3	3	0.6471	52899-07-7	15279.2	17937.2	13877.2	4381.16	1723.91	6800.54	1.25768	0.00433774	0.0709222	3.64908	1.86753	up	-	-
MW0152629	H-Leu-Trp-OH	亮氨酰色氨酸	Amino acids and derivatives	氨基酸及其衍生物	Amino acids and derivatives	氨基酸及其衍生物	C17H23N3O3	3	0.6465	5156-22-9	3321.07	16868.4	14072.5	27789.8	30441.1	24188.2	1.05699	0.0436449	0.169042	0.415704	-1.26637	down	-	-
MW0110277	Kyotorphin	L-酪氨酰-L-精氨酸	Amino acids and derivatives	氨基酸及其衍生物	Amino acids and derivatives	氨基酸及其衍生物	C15H23N5O4	3	0.6456	70904-56-2	64109.1	83648.1	95884	280170	355003	304650	1.42836	0.00363243	0.0672043	0.259242	-1.94763	down	C02993	-
MW0145608	Arg-Phe	L-精氨酰-L-苯丙氨酸	Amino acids and derivatives	氨基酸及其衍生物	Amino acids and derivatives	氨基酸及其衍生物	C15H23N5O3	3	0.6438	2047-13-4	1377.07	1411.81	2301.17	17668.4	9675.41	13890.2	1.42137	0.0329425	0.14797	0.123443	-3.01809	down	-	-
MW0052578	Eplerenone	依普利农	Others	其它类	Ketone compounds	酮类化合物	C24H30O6	3	0.6425	107724-20-9	475182	426387	478459	185629	233976	202177	1.44193	0.000384127	0.0312693	2.21947	1.15022	up	C12512	-
MW0153825	Methyl-2-alpha-L-fucopyranosyl-beta-D-galactoside	甲基-2-α-L-呋喃果糖基-β-D-半乳糖苷	Others	其它类	Saccharides	糖类	C13H24O10	3	0.642	37288-45-2	10369.6	6732.72	7698.29	770.89	1577.56	1753.35	1.40023	0.0180471	0.115392	6.04629	2.59605	up	C04698	-
MW0009257	Olmesartan	奥美沙坦	Benzene and substituted derivatives	苯及其衍生物	Benzene and substituted derivatives	苯及其衍生物	C24H26N6O3	3	0.6384	144689-63-4	216192	128447	214659	436152	404905	446800	1.34232	0.00635907	0.080398	0.434285	-1.20328	down	-	-
ZINC15262412	Gnetupendin A	Gnetupendin A	Others	其它类	Stilbene	茋类	C22H20O5	3	0.6358	382137-56-6	20166.7	16236.4	33690.7	2048.27	11217.7	6752.34	1.17717	0.0680321	0.211089	3.50148	1.80797	up	-	-
ZINC4831363	Digitoxose	毛地黄酮糖	Others	其它类	Saccharides	糖类	C6H12O4	3	0.6357	45742-39-0	13639.7	41928	17262.3	57948.8	477353	155162	1.20283	0.245397	0.418619	0.10548	-3.24496	down	-	-
MW0141163	1,1,3,3-Tetramethyl-1,3-diphenyldisiloxane	1,1,3,3-四甲基-1,3-二苯基二硅氧烷	Heterocyclic compounds	杂环化合物	Heterocyclic compounds	杂环化合物	C16H22OSi2	3	0.6355	56-33-7	67784.3	66592	70968.9	28417.8	27266.3	25016.2	1.45758	2.54701e-05	0.016883	2.54454	1.3474	up	-	-
MEDL01930	Bis-ferulamidobutane	N,N'-二阿魏酰腐胺	Alkaloids	生物碱	Phenolamine	酚胺	C24H28N2O6	3	0.6355	42369-86-8	8345.24	13545.8	12491.1	22398.9	22289.7	25376.6	1.34679	0.00548162	0.0752923	0.490716	-1.02704	down	-	-
MW0107173	Glycyl-l-histidyl-l-lysine	甘氨酰-组氨酰-L-赖氨酸	Amino acids and derivatives	氨基酸及其衍生物	Amino acids and derivatives	氨基酸及其衍生物	C14H24N6O4	3	0.6331	49557-75-7	167298	173463	167973	71837.8	85426.5	86104.7	1.44424	0.00075697	0.0392989	2.09038	1.06376	up	-	-
MW0002600	N-(4-Hydroxy-3,5-dimethoxybenzoyl)glycine	2-{[羟基（4-羟基-3，5-二甲氧基苯基）亚甲基]氨基}乙酸	Benzene and substituted derivatives	苯及其衍生物	Benzene and substituted derivatives	苯及其衍生物	C11H13NO6	3	0.63	62098-75-3	6704.73	6825.79	9737.37	908.91	2383.16	1624.02	1.37842	0.0141797	0.104574	4.73301	2.24276	up	-	-
MEDN1569	Piperlongumine	荜茇酰胺	Alkaloids	生物碱	Pyridine alkaloids	吡啶类生物碱	C17H19NO5	3	0.6294	20069-09-4	158937	146638	195060	73141.9	75406.6	87133.7	1.42132	0.0191066	0.116285	2.1242	1.08692	up	C10166	-
MW0063385	Rubusoside	悬钩子苷	Terpenoids	萜类	Terpene	萜类	C32H50O13	3	0.6267	64849-39-4	58493.3	47563.7	31077.8	4536.59	3329.49	8303.96	1.39338	0.0331445	0.14859	8.4808	3.0842	up	-	-
MW0157915	Thr-Tyr	苏氨酸-酪氨酸	Amino acids and derivatives	氨基酸及其衍生物	Amino acids and derivatives	氨基酸及其衍生物	C13H18N2O5	3	0.6263	145295-02-9	7006.92	3375.23	20016.8	63408.5	40999.7	17872.6	1.10263	0.132513	0.297608	0.2486	-2.0081	down	-	-
MW0136735	6-Methoxyflavanone	6-甲氧基黄烷酮	Others	其它类	Ketone compounds	酮类化合物	C16H14O3	3	0.6259	3034-04-6	17881.8	18603.7	20831.7	7254.12	8404.61	9649.81	1.43002	0.000909639	0.0422072	2.26474	1.17934	up	-	-
MW0169779	Rifaximin (Xifaxan)	利福昔明（Xifaxan）	Benzene and substituted derivatives	苯及其衍生物	Benzene and substituted derivatives	苯及其衍生物	C43H51N3O11	3	0.6221	80621-81-4	42139.9	34408.7	43189.2	16844	12358.5	22391.4	1.3448	0.0048234	0.0730961	2.32077	1.21461	up	-	-
MW0011680	cis-4-Decen-1-ol	（Z)-4-癸烯-1-醇	Alcohol and amines	醇、胺类	Alcohols	醇类	C10H20O	3	0.6219	57074-37-0	11041.3	12808.2	6176.38	22524.3	172048	92639.1	1.23094	0.185335	0.360941	0.104543	-3.25783	down	-	-
MW0148472	Diginatin	Diginatigenin3-O-tridigitoxoside	Steroids	甾体	Steroid	甾体	C41H64O15	3	0.6215	52589-12-5	17066.6	24971.4	8351.76	56376.9	47582	90122.8	1.3101	0.0523132	0.183148	0.259632	-1.94546	down	C08861	-
MW0000022	(+/-)-6-Acetonyldihydrochelerythrine	6-丙酮基二氢白屈菜红碱	Alkaloids	生物碱	Isoquinoline alkaloids	异喹啉类生物碱	C24H23NO5	3	0.6207	22864-92-2	54265.9	54064.1	57197.2	133426	128641	125196	1.45795	0.000200401	0.0273488	0.427427	-1.22625	down	-	-
MW0006745	Dethiosecoemestrin	脱硫乙二胺	Benzene and substituted derivatives	苯及其衍生物	Benzene and substituted derivatives	苯及其衍生物	C27H20N2O10	3	0.62	104799-51-1	8660.54	6214.89	10053.3	3520.75	5345.76	2477.23	1.24565	0.0356179	0.152768	2.19758	1.13591	up	-	-
MEDP1294	Leu-Gly	L-亮氨酰-L-甘氨酸	Amino acids and derivatives	氨基酸及其衍生物	Amino acids and derivatives	氨基酸及其衍生物	C8H16N2O3	3	0.6198	686-50-0	3534.16	3800.87	6465.64	1619.84	2483.5	1974.08	1.29071	0.10201	0.258647	2.27081	1.18321	up	-	-
MEDL02621	(R)-Higenamine	去甲乌药碱	Alkaloids	生物碱	Isoquinoline alkaloids	异喹啉类生物碱	C16H17NO3	3	0.6191	106032-53-5	7.47113e+07	7.58705e+07	7.18807e+07	3.10401e+07	3.1838e+07	2.76428e+07	1.45334	1.57169e-05	0.0152504	2.45758	1.29724	up	C06346	-
MW0156616	Sennoside D	番泻苷D	Benzene and substituted derivatives	苯及其衍生物	Benzene and substituted derivatives	苯及其衍生物	C42H40O19	3	0.618	37271-17-3	9183.45	14510.5	9658.48	1545.23	5927.01	2940.07	1.23267	0.0260803	0.133863	3.20317	1.6795	up	-	-
MW0061830	Pinusolide	松内酯	Terpenoids	萜类	Ditepenoids	二萜	C21H30O4	3	0.6175	31685-80-0	51583.2	36863.2	26593.8	8447.56	10352.1	23213.5	1.20361	0.0572755	0.191445	2.7382	1.45323	up	-	-
MEDP1217	3-Methyl-4-pentenoic acid	3-甲基-4-戊烯酸	Organic acids	有机酸	Organic acids	有机酸	C6H10O2	3	0.6136	1879-03-4	235412	193563	254395	47114.1	49944.1	59368.6	1.45151	0.0081866	0.0886554	4.36863	2.12718	up	-	-
MW0138479	Isoginkgetin	异银杏黄素	Flavonoids	黄酮	Biflavones	双黄酮	C32H22O10	3	0.6116	548-19-6	5433.85	6549.08	2863.45	533.53	512.05	1770.97	1.27699	0.0523768	0.183148	5.27112	2.39811	up	-	-
MW0152588	Leucomycin A13	亮霉素A13	Others	其它类	Lactones	内酯类化合物	C41H69NO14	3	0.6113	78897-52-6	458237	401463	420367	149541	226690	170175	1.40705	0.00151254	0.0494223	2.3427	1.22817	up	C14063	-
MW0006870	Dimoxystrobin	双氧嘧啶	Benzene and substituted derivatives	苯及其衍生物	Benzene and substituted derivatives	苯及其衍生物	C19H22N2O3	3	0.61	149961-52-4	5961.28	5870.28	2729.66	1354.1	2995.47	1769.79	1.12793	0.101046	0.257284	2.37953	1.25068	up	-	-
MW0000905	[12]-Gingerol	[12]-姜酚	Phenolic acids	酚酸类	Phenolic acids	酚酸类	C23H38O4	3	0.6094	104264-55-3	6062.21	3286.06	4496.55	7837.16	13047	15712.1	1.26143	0.0687477	0.211982	0.378312	-1.40235	down	-	-
MEDN0010	Citrulline	L-瓜氨酸	Amino acids and derivatives	氨基酸及其衍生物	Amino acids and derivatives	氨基酸及其衍生物	C6H13N3O3	3	0.609	372-75-8	460711	309274	328837	882331	1.05336e+06	1.07712e+06	1.40837	0.00154191	0.0494223	0.364717	-1.45515	down	C00327	ko00220,ko01100,ko01110,ko01230
MEDN0477	2-Oxovaleric acid	2-戊酮酸	Organic acids	有机酸	Organic acids	有机酸	C5H8O3	3	0.6088	1821-02-9	2567.34	4375.69	4131.43	8026.73	8356.7	10664	1.3489	0.00856095	0.0904847	0.409446	-1.28826	down	C06255	-
MW0115897	(3R)-3-{[6-(4-methylphenyl)pyridin-3-yl]oxy}-1-azabicyclo[2.2.2]octane	(3R)-3-{[6-(4-甲基苯基)吡啶-3-基]氧基}-1-氮杂双环[2.2.2]辛烷	Alkaloids	生物碱	Pyridine alkaloids	吡啶类生物碱	C19H22N2O	3	0.6029	669770-29-0	1573.97	1738.85	2981.84	435.62	1328.4	373.9	1.19463	0.0700209	0.213524	2.94429	1.55792	up	-	-
MW0139901	7-Hydroxycoumarinyl Arachidonate	伞形花生四烯酸	Others	其它类	Others	其它	C29H36O4	3	0.6023	161180-11-6	140754	152557	152838	37104.1	48903.9	44937.8	1.45035	4.34018e-05	0.0181342	3.40713	1.76856	up	-	-
MW0111384	12-Hydroxy-6-epi-albrassitriol	12-Hydroxy-6-epi-albrassitriol	Alcohol and amines	醇、胺类	Alcohols	醇类	C15H26O4	3	0.5984	178330-78-4	7130.44	5465.21	5682.9	29950.1	23252.9	21604.4	1.43929	0.0148681	0.105733	0.244342	-2.03303	down	-	-
MW0154453	N-Formyldemecolcine	N-甲酰脱氧二甲基甘氨酸	Benzene and substituted derivatives	苯及其衍生物	Benzene and substituted derivatives	苯及其衍生物	C22H25NO6	3	0.5975	14686-61-4	191240	231379	207736	93166.5	114334	63786.3	1.35152	0.00363475	0.0672043	2.32357	1.21634	up	-	-
ZINC85488831	Gastrodioside	天麻醚苷	Phenolic acids	酚酸类	Phenolic acids	酚酸类	C20H24O8	3	0.5954	77162-64-2	64292.7	52306.3	36168.7	129871	89610.9	190182	1.28445	0.0900671	0.241987	0.37291	-1.4231	down	-	-
MW0140172	1,2-Didecanoylglycerol	1,2-二癸酰基甘油	GL	甘油脂类	MG	单甘油酯	C23H44O5	3	0.5909	82950-64-9 | 17863-69-3	171883	226040	226888	142629	75526.9	92995.4	1.2605	0.0185391	0.11562	2.00806	1.0058	up	-	-
MW0126590	N-[2-(5-Hydroxy-1H-indol-3-yl)ethyl]octadecanamide	硬脂酰5-羟色胺	Lipids	脂质	Free fatty acids	游离脂肪酸	C28H46N2O2	3	0.5899	67964-87-8	41708.2	50884.9	39500.3	72532.7	597355	264578	1.15948	0.223127	0.398255	0.141357	-2.82258	down	-	-
MW0138892	Dihydrokawain	二氢醉椒素	Others	其它类	Lactones	内酯类化合物	C14H16O3	3	0.5885	587-63-3	57052	69106.9	17075	128842	151230	158410	1.22371	0.0105795	0.0948362	0.326658	-1.61415	down	-	-
MW0056747	Palmitoyl Serinol	棕榈酰丝氨醇	Lipids	脂质	Free fatty acids	游离脂肪酸	C19H39NO3	3	0.5877	126127-31-9	61943.7	80156.9	58893.5	146690	137617	149378	1.42733	0.00178698	0.0515007	0.463456	-1.1095	down	-	-
MW0000816	1-Phenyl-3-[(S)-1-benzyl-2-hydroxyethyl]urea	1-苯基-3-[(S)-1-苄基-2-羟乙基]脲	Benzene and substituted derivatives	苯及其衍生物	Benzene and substituted derivatives	苯及其衍生物	C16H18N2O2	3	0.5863	223600-53-1	41467.2	26908.8	24797.1	249.79	3988.12	4311.38	1.23242	0.0270082	0.136215	10.8983	3.44604	up	-	-
MEDP1170	9-Octadecenal	9-十八烯醛	Others	其它类	Aldehyde compounds	醛类化合物	C18H34O	3	0.5861	5090-41-5	102092	114276	148524	52751.2	34086.7	80476.7	1.22359	0.0272714	0.137095	2.18087	1.12491	up	-	-
MW0152826	Lycaconitine	Lycaconitine	Benzene and substituted derivatives	苯及其衍生物	Benzene and substituted derivatives	苯及其衍生物	C36H48N2O10	3	0.5855	25867-19-0	3330.81	2256.47	1674.09	7644.85	4372.4	2712.65	1.00066	0.221928	0.397126	0.492968	-1.02043	down	-	-
MW0105756	Arginyl-Valine	精氨酰缬氨酸	Amino acids and derivatives	氨基酸及其衍生物	Amino acids and derivatives	氨基酸及其衍生物	C11H23N5O3	3	0.5838	2896-20-0	44144.2	43232	31453.8	8589.79	5441.32	18763.9	1.27924	0.00748136	0.0851808	3.62342	1.85735	up	-	-
MW0108911	n-Ribosylhistidine	N-核糖基组氨酸	Amino acids and derivatives	氨基酸及其衍生物	Amino acids and derivatives	氨基酸及其衍生物	C11H17N3O6	3	0.5835	98379-91-0	650.08	1826.43	2087.4	9799.17	3583.71	12945.8	1.24664	0.115202	0.27525	0.173344	-2.52829	down	-	-
MW0114522	Gilvocarcin V	褐黄癌菌素 V	Others	其它类	Others	其它	C27H26O9	3	0.573	77879-90-4	52212.7	39452.2	48971.8	153482	148754	104232	1.4011	0.0245603	0.129594	0.345997	-1.53117	down	-	-
MW0125248	Myristicin	肉豆蔻醚	Lignans and Coumarins	木脂素和香豆素	Lignans	木脂素	C11H12O3	3	0.5724	607-91-0	5468.46	3915.31	6290.46	15577.9	10042	15014.5	1.34266	0.0288842	0.140045	0.385737	-1.37431	down	C10480	-
MW0054028	Ipecoside	吐根甙	Others	其它类	Lactones	内酯类化合物	C27H35NO12	3	0.5644	15401-60-2	2060.29	2114.52	2299.55	5836.55	6559.85	7076.57	1.44895	0.00529615	0.0752923	0.332479	-1.58866	down	C09464	-
MW0129510	2',6'-Dihydroxy-4,4'-dimethoxychalcone	2'，6'-二羟基4'，4-二甲氧基查尔酮	Flavonoids	黄酮	Chalcones	查耳酮	C17H16O5	3	0.5633	20621-49-2 | 94441-99-3	44291	45063.7	18669.5	79686.6	95995.9	88334.7	1.26523	0.0124084	0.0991073	0.409156	-1.28928	down	-	-
MEDL02179	Coumarin	香豆素	Lignans and Coumarins	木脂素和香豆素	Coumarins	香豆素	C9H6O2	3	0.5555	91-64-5	6482.32	8506.3	7473.58	21724.3	16616.3	21570.6	1.42701	0.0107528	0.0948362	0.374925	-1.41533	down	C05851	ko00999,ko01110
MEDL02634	2,3,5,6-Tetramethylpyrazine	2,3,5,6-四甲基吡嗪; 川芎嗪	Alkaloids	生物碱	Alkaloids	生物碱	C8H12N2	3	0.5551	1124-11-4	1078.37	1791.71	2066.08	10885.9	13125	9523.63	1.42293	0.00805458	0.0886554	0.147196	-2.76419	down	-	-
MW0102892	2-Dodecenoic acid	反十二烷基烯酸	Lipids	脂质	Free fatty acids	游离脂肪酸	C12H22O2	3	0.5479	32466-54-9 | 4412-16-2 | 1289-45-8	36651.1	32591.7	31564.4	95783.5	96985.5	75301.1	1.43603	0.0124368	0.0991073	0.376048	-1.41101	down	-	-
MW0117473	2-(2-methyl-2H-tetrazol-5-yl)aniline	2-(2-甲基-2H-四唑-5-基)苯胺	Heterocyclic compounds	杂环化合物	Heterocyclic compounds	杂环化合物	C8H9N5	3	0.5456	436100-13-9 | 460334-67-2	5881.37	11415.9	7774.82	29479.8	26301.5	22305.4	1.38417	0.00314023	0.0665633	0.32108	-1.63899	down	-	-
MW0121592	5-Methoxy-dl-tryptophan	5-甲氧基-DL-色氨酸	Amino acids and derivatives	氨基酸及其衍生物	Amino acids and derivatives	氨基酸及其衍生物	C12H14N2O3	3	0.5402	28052-84-8	20732.5	18267.9	17751.7	42967.8	44188.9	33928.2	1.41676	0.0161897	0.109924	0.468697	-1.09327	down	-	-
MEDL02591	Arecoline	槟榔碱	Alkaloids	生物碱	Piperidine alkaloids	哌啶类生物碱	C8H13NO2	3	0.5395	63-75-2	17096.8	17068	17203.1	3811.9	2290.61	3975.47	1.42644	0.00143477	0.0494223	5.09704	2.34966	up	C10129	-
MW0117133	1'H-spiro[cyclopentane-1,2'-quinazolin]-4'(3'H)-one	1'H-螺[环戊烷-1,2'-喹唑啉]-4'(3'H)-one	Others	其它类	Ketone compounds	酮类化合物	C12H14N2O	3	0.5389	1135-80-4	11052.4	10025.1	10123.5	3025.98	2903.76	4345.23	1.42272	0.000445857	0.0336544	3.0366	1.60246	up	-	-
MW0149199	(4aS,6aR,6aS,6bR,8aR,10S,12aR,14bS)-10-[(2S,3S,5R)-5-hydroxy-4-oxo-3-[(2S,3R,4S,5S,6R)-3,4,5-trihydroxy-6-(hydroxymethyl)oxan-2-yl]oxyoxan-2-yl]oxy-2,2,6a,6b,9,9,12a-heptamethyl-1,3,4,5,6,6a,7,8,8a,10,11,12,13,14b-tetradecahydropicene-4a-carboxylic acid	松脂素B	Heterocyclic compounds	杂环化合物	Heterocyclic compounds	杂环化合物	C41H64O12	3	0.5378	117585-05-4	60549.2	74007.3	90590.6	194679	156412	142555	1.36396	0.0137431	0.103018	0.45609	-1.13261	down	C08943	-
MW0108317	Met-Ser	蛋氨酰丝氨酸	Amino acids and derivatives	氨基酸及其衍生物	Amino acids and derivatives	氨基酸及其衍生物	C8H16N2O4S	3	0.5365	14517-43-2	65026	55569.2	22468.1	344.04	1590.23	21873.1	1.10784	0.0711412	0.215124	6.0092	2.58717	up	-	-
MW0168465	1-Methylnicotinamide	3-氨基甲酰-1-甲基氧化吡啶	Alkaloids	生物碱	Pyridine alkaloids	吡啶类生物碱	C7H9N2O+	3	0.5353	3106-60-3	121875	96896	125414	35422.7	38725.2	36683.8	1.45167	0.0123109	0.0989993	3.10548	1.63481	up	C02918	ko00760,ko01100
MW0118215	2-Amino-4-(4-methoxy-phenyl)-6-phenyl-nicotinonitrile	2-氨基-4-(4-甲氧基-苯基)-6-苯基-烟腈	Heterocyclic compounds	杂环化合物	Heterocyclic compounds	杂环化合物	C19H15N3O	3	0.5345	38477-51-9	9819.55	10718.8	4736.71	14768.5	20358.8	16629.6	1.20715	0.0243283	0.12925	0.48834	-1.03404	down	-	-
MW0015126	7,8-Dehydro-beta-micropteroxanthin	7,8-脱氢-β-微蝶黄素	Alcohol and amines	醇、胺类	Alcohols	醇类	C27H38O2	3	0.5237	148031-76-9	3760.46	1753.07	1970.37	5766.71	57580.1	32931.3	1.21543	0.18631	0.361859	0.0777321	-3.68535	down	-	-
MEDL01840	Vanillylamine	香兰素胺	Alkaloids	生物碱	Phenolamine	酚胺	C8H11NO2	3	0.5223	1196-92-5	504897	474632	409721	1.3389e+06	880979	993310	1.39505	0.0429014	0.167561	0.432358	-1.2097	down	C16666	ko00996,ko01100,ko01110
MW0156520	2-[(1R,5R)-5-[2,4-dihydroxy-3-(3-methylbut-2-enyl)benzoyl]-5-(2,4-dihydroxyphenyl)-3-methylcyclohex-2-en-1-yl]-1,3,5a,8-tetrahydroxy-10a-(3-methylbut-2-enyl)-[1]benzofuro[3,2-b]chromen-11-one	桑根农E	Heterocyclic compounds	杂环化合物	Heterocyclic compounds	杂环化合物	C45H44O12	3	0.5173	81381-69-3	19662.2	21093.9	18093.1	10146.7	6390.67	9394.43	1.3666	0.0021074	0.0560152	2.26938	1.1823	up	C17871	-
MW0000810	1,1'-Bi-2-naphthol	（S)-(-)-1,1'-Bi-2-萘酚	Benzene and substituted derivatives	苯及其衍生物	Benzene and substituted derivatives	苯及其衍生物	C20H14O2	3	0.5146	18531-94-7 | 602-09-5 | 18531-99-2	28769.2	37268.9	31028.1	7748.98	12078.9	15888.7	1.3426	0.00419236	0.0709222	2.71768	1.44237	up	-	-
MW0161325	Benzylsulfinylsulfanylmethylbenzene	苄基亚磺酰基硫烷基甲基苯	Benzene and substituted derivatives	苯及其衍生物	Benzene and substituted derivatives	苯及其衍生物	C14H14OS2	3	0.5048	16302-98-0	4330.4	1137.69	3284.74	6363.74	8715.11	7082.52	1.12892	0.0217785	0.121749	0.394959	-1.34023	down	-	-
MW0063595	Sorbitan laurate	山梨糖醇月桂酸酯	FA	脂肪酰类	Others	其它	C18H34O6	3	0.5026	16287-68-6 | 1338-39-2 | 5959-89-7	5026.01	3854.8	6987.99	3355.59	1482.05	1476.99	1.22385	0.0523788	0.183148	2.51302	1.32942	up	-	-
MW0157635	Thr-Glu-Lys-Asp-Glu	Thr-Glu-Lys-Asp-Glu	Amino acids and derivatives	氨基酸及其衍生物	Amino acids and derivatives	氨基酸及其衍生物	C24H40N6O13	2	0.9175	-	883899	1.46414e+06	1.69555e+06	531414	502026	772267	1.25411	0.0773283	0.224141	2.23934	1.16307	up	-	-
MW0153076	Lys-Met-His	L-赖氨酸-L-蛋氨酸-L-组氨酸	Amino acids and derivatives	氨基酸及其衍生物	Amino acids and derivatives	氨基酸及其衍生物	C17H30N6O4S1	2	0.9123	-	90677.8	110338	70335.3	235673	255331	178597	1.38006	0.0147773	0.105733	0.405243	-1.30314	down	-	-
MW0144564	Ala-Glu-Ile-Lys	Ala-Glu-Ile-Lys	Amino acids and derivatives	氨基酸及其衍生物	Amino acids and derivatives	氨基酸及其衍生物	C20H37N5O7	2	0.9065	-	137176	94467.1	135540	52835	48620	46155.8	1.41399	0.0324629	0.147258	2.48751	1.3147	up	-	-
MW0152916	Lys-Asp-Tyr-Glu-Leu	Lys-Asp-Tyr-Glu-Leu	Amino acids and derivatives	氨基酸及其衍生物	Amino acids and derivatives	氨基酸及其衍生物	C30H46N6O11	2	0.9012	-	5909.62	8854.26	6030.75	11334.6	12212.4	21776.8	1.23588	0.125259	0.28858	0.458801	-1.12406	down	-	-
MW0145746	Asn-Glu-Thr-Asp-Leu	Asn-Glu-Thr-Asp-Leu	Amino acids and derivatives	氨基酸及其衍生物	Amino acids and derivatives	氨基酸及其衍生物	C23H38N6O12	2	0.8986	-	46440.2	80275.1	62438	16013.8	12106.2	36116.8	1.23364	0.0305943	0.143974	2.94462	1.55808	up	-	-
MW0150309	Gly-Arg-Tyr	甘氨酸-精氨酸-酪氨酸	Amino acids and derivatives	氨基酸及其衍生物	Amino acids and derivatives	氨基酸及其衍生物	C17H26N6O5	2	0.8791	-	6405.39	8742.57	6328.51	24610.5	15893.6	16832.4	1.38904	0.0407594	0.16295	0.374569	-1.4167	down	-	-
MW0158653	Tyr-Tyr-Ser	酪氨酸-酪氨酸-丝氨酸	Amino acids and derivatives	氨基酸及其衍生物	Amino acids and derivatives	氨基酸及其衍生物	C21H25N3O7	2	0.8552	-	14332	14072.5	11480.5	31920.2	23862.8	25430.5	1.40341	0.0203519	0.118783	0.491113	-1.02587	down	-	-
MW0054380	Ethyl alpha-linolenate	亚麻酸乙酯	Lipids	脂质	Free fatty acids	游离脂肪酸	C20H34O2	2	0.8528	-	89521.4	83224.7	70300	17221	32930.8	63013.6	1.11333	0.0677509	0.210493	2.14771	1.1028	up	-	-
MW0155193	Phe-Glu-Val-Glu	苯丙氨酰-谷氨酰-缬氨酸-谷氨酸	Amino acids and derivatives	氨基酸及其衍生物	Amino acids and derivatives	氨基酸及其衍生物	C24H34N4O9	2	0.8333	-	276631	361971	303572	23807.6	29411.5	103019	1.32612	0.00186764	0.0519602	6.03037	2.59225	up	-	-
MW0152337	Leu-Gly-Arg-Leu-Val	Leu-Gly-Arg-Leu-Val	Amino acids and derivatives	氨基酸及其衍生物	Amino acids and derivatives	氨基酸及其衍生物	C25H48N8O6	2	0.8185	-	24195.4	23463.1	45256.5	18253.2	7716.22	14744.3	1.14819	0.120465	0.28273	2.28216	1.1904	up	-	-
MW0145547	Arg-Tyr-Met	L-精氨酰-L-酪氨酰-L-蛋氨酸	Amino acids and derivatives	氨基酸及其衍生物	Amino acids and derivatives	氨基酸及其衍生物	C20H32N6O5S1	2	0.8155	-	20566.5	22452	23799	4153.09	1696.95	13274.9	1.16361	0.0382299	0.157653	3.49375	1.80478	up	-	-
MW0153692	Met-Trp-Phe	甲硫氨酰-色氨酸-苯丙氨酸	Amino acids and derivatives	氨基酸及其衍生物	Amino acids and derivatives	氨基酸及其衍生物	C25H30N4O4S1	2	0.8121	-	9357.15	7013.31	7587.22	13898.2	18291.1	17917.5	1.38142	0.0121516	0.0983406	0.478132	-1.06452	down	-	-
MW0145850	Asn-Phe-Ala-Arg	Asn-Phe-Ala-Arg	Amino acids and derivatives	氨基酸及其衍生物	Amino acids and derivatives	氨基酸及其衍生物	C22H34N8O6	2	0.8079	-	44254.7	62480.9	56625.9	28975.3	14940.9	20308.3	1.32389	0.00960256	0.0931872	2.5436	1.34687	up	-	-
MW0145765	Asn-His-Asp	Asn-His-Asp	Amino acids and derivatives	氨基酸及其衍生物	Amino acids and derivatives	氨基酸及其衍生物	C14H20N6O7	2	0.791	-	56395.9	46893	57579.4	116261	102469	107040	1.42524	0.000566424	0.0356647	0.49381	-1.01797	down	-	-
MW0110992	Dicyclohexylamine	二环己胺	Alcohol and amines	醇、胺类	Amines	胺类	C12H23N	2	0.7907	-	44.26	17.43	27.93	106.15	55.75	44.16	1.08097	0.167439	0.341802	0.434922	-1.20117	down	C14686	-
MW0148001	Cys-Gln-Met	半胱氨酸-谷酰氨-蛋氨酸	Amino acids and derivatives	氨基酸及其衍生物	Amino acids and derivatives	氨基酸及其衍生物	C13H24N4O5S2	2	0.7882	-	18700.4	15470.8	22376.2	50964	40097.9	26988	1.24528	0.0879981	0.239198	0.479012	-1.06186	down	-	-
MW0145221	Arachidonic acid-biotin	花生四烯酸-生物素	FA	脂肪酰类	Others	其它	C30H48N2O5S	2	0.788	-	5885.49	11176.7	6894.18	8750.22	104958	49846	1.03291	0.236656	0.410193	0.146474	-2.77128	down	-	-
MW0055323	N-(dodecanoyl)-sphing-4-enine-1-phosphocholine	N-月桂酰基-D-赤型鞘氨酰基磷酸胆碱	SL	鞘脂类	SM	鞘磷脂	C35H71N2O6P	2	0.779	-	34580.5	13478.3	32152.4	8122.4	7410.26	1482.51	1.18712	0.0758922	0.221903	4.71409	2.23698	up	C00550	ko00600,ko01100
MW0004100	3-methoxybenzene-1,2-diol	3-甲氧基儿茶酚	Phenolic acids	酚酸类	Phenolic acids	酚酸类	C7H8O3	2	0.777	-	4191.33	5202.8	5559.96	10646	22378.5	38724.8	1.28585	0.145276	0.314844	0.208421	-2.26243	down	-	-
MW0014461	Alkynyl 4-hydroxy-2-nonenal	4-羟基壬醛炔	Organic acids	有机酸	Organic acids	有机酸	C9H12O2	2	0.7769	-	86842.1	68055.7	105348	54536.2	37422.4	36021.3	1.30941	0.0349134	0.151825	2.03349	1.02396	up	-	-
MW0131241	3-(3-hydroxy-4-methoxyphenyl)propanoic acid	3-(3-羟基-4-甲氧基苯基）丙酸	Organic acids	有机酸	Organic acids	有机酸	C10H12O4	2	0.774	-	55047.9	52353.4	98319	134071	143180	135975	1.26142	0.0394156	0.160036	0.49784	-1.00625	down	-	-
MW0158927	Val-Asn-Tyr-Asp	Val-Asn-Tyr-Asp	Amino acids and derivatives	氨基酸及其衍生物	Amino acids and derivatives	氨基酸及其衍生物	C22H31N5O9	2	0.7691	-	4041.22	8125.31	7510.6	1856.68	2199.78	3391.18	1.258	0.0710939	0.215124	2.64206	1.40166	up	-	-
MW0145251	Arg-Ala-Leu-Lys	Arg-Ala-Leu-Lys	Amino acids and derivatives	氨基酸及其衍生物	Amino acids and derivatives	氨基酸及其衍生物	C21H42N8O5	2	0.7679	-	28203.5	7955.12	14724.5	2333.81	4582.67	11065	1.02183	0.198572	0.373294	2.82974	1.50067	up	-	-
MW0109069	alphaS-Amino-2-[[4S-amino-4-carboxybutyl]amino]-4H-imidazo[4,5-b]pyridine-4-hexanoic acid	αS-氨基-2-[[4S-氨基-4-羧丁基]氨基]-4H-咪唑并[4,5-b]吡啶-4-己酸	Amino acids and derivatives	氨基酸及其衍生物	Amino acids and derivatives	氨基酸及其衍生物	C17H26N6O4	2	0.766	-	1076.91	2368.23	1166.23	7814.92	3037.27	10020.6	1.2673	0.113979	0.273737	0.220927	-2.17836	down	-	-
MW0158458	Tyr-Glu-Gly	酪氨酸-谷氨酸-甘氨酸	Amino acids and derivatives	氨基酸及其衍生物	Amino acids and derivatives	氨基酸及其衍生物	C16H21N3O7	2	0.7645	-	37814.6	37615.4	36212.1	78435.9	83058.4	66318.9	1.43527	0.0154551	0.107614	0.49006	-1.02897	down	-	-
MW0146151	Asp-Ile-Lys-Asp	Asp-Ile-Lys-Asp	Amino acids and derivatives	氨基酸及其衍生物	Amino acids and derivatives	氨基酸及其衍生物	C20H35N5O9	2	0.7645	-	131353	107804	180694	58338	82610.7	50213.5	1.30779	0.0533247	0.185265	2.19631	1.13508	up	-	-
MW0155378	Phe-Tyr-Asn-Glu	Phe-Tyr-Asn-Glu	Amino acids and derivatives	氨基酸及其衍生物	Amino acids and derivatives	氨基酸及其衍生物	C27H33N5O9	2	0.7637	-	16403.7	25235.5	23453.8	62358.4	54533.8	41947.8	1.36173	0.0204253	0.118789	0.409803	-1.287	down	-	-
MW0130883	2-Methyl-5,7,8-trimethoxyisoflavone	2-甲基-5,7,8-三甲氧基异黄酮	Flavonoids	黄酮	Flavones	黄酮	C19H18O5	2	0.7635	-	19514.8	18946.3	34912.6	57154.8	49175.1	45218.1	1.26317	0.0189345	0.116237	0.484161	-1.04644	down	-	-
MW0110062	Trp-Glu-Lys	色氨酸-谷氨酸-赖氨酸	Amino acids and derivatives	氨基酸及其衍生物	Amino acids and derivatives	氨基酸及其衍生物	C22H31N5O6	2	0.7633	-	98205.7	90403.9	78021.5	159358	169700	208017	1.40537	0.0156477	0.108043	0.49645	-1.01028	down	-	-
MW0139287	Peonidin 3-(6''-p-coumarylglucoside)	芍药花素-3-(6''-p-香豆基葡糖苷）	Flavonoids	黄酮	Anthocyanidins	花青素	C31H29O13+	2	0.7632	-	8200.13	8839.13	4690.59	1802.29	5365.54	1522.49	1.11354	0.0719112	0.216387	2.50047	1.3222	up	-	-
MW0146115	Asp-Gly-Lys-Ala-Asp	Asp-Gly-Lys-Ala-Asp	Amino acids and derivatives	氨基酸及其衍生物	Amino acids and derivatives	氨基酸及其衍生物	C19H32N6O10	2	0.7625	-	10206.9	13603.2	11860.1	8249.69	6706.4	2133.9	1.04394	0.0574981	0.191445	2.0872	1.06157	up	-	-
MW0155411	Phe-Val-Lys-Lys	Phe-Val-Lys-Lys	Amino acids and derivatives	氨基酸及其衍生物	Amino acids and derivatives	氨基酸及其衍生物	C26H44N6O5	2	0.7614	-	6.02614e+06	6.15216e+06	5.28565e+06	1.70181e+06	2.38875e+06	3.9339e+06	1.2556	0.0278044	0.137687	2.17634	1.1219	up	-	-
MW0138677	kaempferol 3-O-beta-D-glucopyranosyl-7-O-alpha-L-rhamnopyranoside	山奈酚3-O-BETA-D-吡喃葡萄糖基-7-O-ALPHA-L-吡喃鼠李糖苷	Flavonoids	黄酮	Flavonols	黄酮醇	C27H30O15	2	0.7599	-	3341.67	4694.2	1443.7	638.33	1372.2	1450.88	1.06115	0.15974	0.332821	2.73864	1.45346	up	-	-
MW0144735	Ala-Ser-Ser-Thr-Lys	Ala-Ser-Ser-Thr-Lys	Amino acids and derivatives	氨基酸及其衍生物	Amino acids and derivatives	氨基酸及其衍生物	C19H36N6O9	2	0.7599	-	18834.7	18225.2	8404.71	37477.4	27183	33838.7	1.23396	0.017919	0.115158	0.461573	-1.11537	down	-	-
MW0110054	Trp-Asn-Arg	色氨酸-天冬酰胺-精氨酸	Amino acids and derivatives	氨基酸及其衍生物	Amino acids and derivatives	氨基酸及其衍生物	C21H30N8O5	2	0.7595	-	7760.53	24168.6	19824.1	48532.7	26248.8	34539	1.06568	0.0829562	0.230493	0.473408	-1.07884	down	-	-
MW0158415	Tyr-Asp-Leu-Glu	酪氨酸-天冬氨酸-亮氨酸-谷氨酸	Amino acids and derivatives	氨基酸及其衍生物	Amino acids and derivatives	氨基酸及其衍生物	C24H34N4O10	2	0.759	-	72814.6	84915	76939.4	225145	187922	156876	1.41948	0.0266536	0.135076	0.411741	-1.28019	down	-	-
MW0139311	Petunidin 3-(6''-p-coumarylglucoside)	矮牵牛花3-(6''-p-香豆基葡糖苷）	Flavonoids	黄酮	Anthocyanidins	花青素	C31H29O14+	2	0.7585	-	5083.99	5785.07	1904.11	6577.28	13634.3	13367.7	1.14002	0.0758805	0.221903	0.380388	-1.39445	down	-	-
MW0155357	Phe-Thr-Pro-Thr-Glu	Phe-Thr-Pro-Thr-Glu	Amino acids and derivatives	氨基酸及其衍生物	Amino acids and derivatives	氨基酸及其衍生物	C27H39N5O10	2	0.7578	-	959523	1.42481e+06	935324	329676	434821	737182	1.21418	0.0426372	0.167561	2.21063	1.14446	up	-	-
MW0159215	Val-Tyr-Glu-Lys	Val-Tyr-Glu-Lys	Amino acids and derivatives	氨基酸及其衍生物	Amino acids and derivatives	氨基酸及其衍生物	C25H39N5O8	2	0.7576	-	208803	209067	190502	74914.1	88959.3	79566.2	1.44942	0.000194024	0.0273488	2.49907	1.32139	up	-	-
MW0144755	Ala-Thr-Tyr-Lys	Ala-Thr-Tyr-Lys	Amino acids and derivatives	氨基酸及其衍生物	Amino acids and derivatives	氨基酸及其衍生物	C22H35N5O7	2	0.757	-	217436	149882	180316	513449	501419	312345	1.33073	0.0476341	0.175311	0.412619	-1.27712	down	-	-
MW0155249	Phe-Leu-Glu-Lys-Asp	Phe-Leu-Glu-Lys-Asp	Amino acids and derivatives	氨基酸及其衍生物	Amino acids and derivatives	氨基酸及其衍生物	C30H46N6O10	2	0.7565	-	9933.79	5669	4636.89	16885.1	29008.2	59866.3	1.28316	0.153695	0.326845	0.191374	-2.38553	down	-	-
MW0155828	Pro-Gln-Asp	脯氨酰-谷氨酰胺-天冬氨酸	Amino acids and derivatives	氨基酸及其衍生物	Amino acids and derivatives	氨基酸及其衍生物	C14H22N4O7	2	0.756	-	295.83	407.87	685.49	32.51	235.41	166.89	1.07935	0.0926018	0.244828	3.19494	1.67579	up	-	-
MW0152498	Leu-Ser-Phe-Met-Gln	Leu-Ser-Phe-Met-Gln	Amino acids and derivatives	氨基酸及其衍生物	Amino acids and derivatives	氨基酸及其衍生物	C28H44N6O8S	2	0.7555	-	14989.2	23663.5	9716.78	51602.6	49747	49961.3	1.36184	0.0124076	0.0991073	0.31967	-1.64535	down	-	-
MW0155263	Phe-Leu-Val-Met-Met	Phe-Leu-Val-Met-Met	Amino acids and derivatives	氨基酸及其衍生物	Amino acids and derivatives	氨基酸及其衍生物	C30H49N5O6S2	2	0.7551	-	282662	225184	244010	77663.7	72346.3	82164.7	1.45043	0.00802193	0.0886554	3.23832	1.69525	up	-	-
MW0011860	1,2-Dimyristoleoyl-sn-glycero-3-phosphocholine	1,2-二-(9Z-十四碳烯基)-sn-甘油-3-磷酸胆碱	GP	甘油磷脂类	PC	磷脂酰胆碱	C36H68NO8P	2	0.7547	-	4861.57	2779.18	3412.33	27413.7	35266.5	22631.6	1.42954	0.0191219	0.116285	0.129561	-2.9483	down	-	-
MW0145452	Arg-Met-Met	L-精氨酰-L-甲硫氨酰-L-甲硫氨酸	Amino acids and derivatives	氨基酸及其衍生物	Amino acids and derivatives	氨基酸及其衍生物	C16H32N6O4S2	2	0.754	-	4782.64	6280.1	8416.46	19062	19064.2	16015.3	1.38007	0.00140269	0.0494223	0.359783	-1.4748	down	-	-
MW0157566	Thr-Asn-Asp-Lys	Thr-Asn-Asp-Lys	Amino acids and derivatives	氨基酸及其衍生物	Amino acids and derivatives	氨基酸及其衍生物	C18H32N6O9	2	0.7534	-	509078	447606	100902	941646	1.44885e+06	1.34958e+06	1.19779	0.0121866	0.0983406	0.282771	-1.82229	down	-	-
MW0158100	Trp-Arg-Thr	色氨酸-精氨酸-苏氨酸	Amino acids and derivatives	氨基酸及其衍生物	Amino acids and derivatives	氨基酸及其衍生物	C21H31N7O5	2	0.7534	-	20678.8	19323.1	14485.1	48764.8	27817.3	55042.6	1.2924	0.0822824	0.230493	0.413957	-1.27245	down	-	-
MW0155309	Phe-Phe-Val	苯丙氨酰-苯丙氨酰-缬氨酸	Amino acids and derivatives	氨基酸及其衍生物	Amino acids and derivatives	氨基酸及其衍生物	C23H29N3O4	2	0.7532	-	25402.1	26567.5	20634.2	71371.6	36867.5	45770.2	1.27907	0.115633	0.275997	0.471425	-1.0849	down	-	-
MW0154554	N-methylundec-10-enamide	N-methylundec-10-enamide	FA	脂肪酰类	Others	其它	C12H23NO	2	0.7531	-	5973.72	5010.22	6552.94	29460.4	11881.6	16997.8	1.3178	0.12007	0.282517	0.300598	-1.73409	down	-	-
MW0053732	2,3-Dihydroxypropyl 2-[(octadec-9-enoyl)amino]ethyl hydrogen phosphate	2,3-Dihydroxypropyl 2-[(octadec-9-enoyl)amino]ethyl hydrogen phosphate	Lipids	脂质	Free fatty acids	游离脂肪酸	C23H46NO7P	2	0.7523	-	13598.4	18423.7	9267.04	57523.4	48698.2	29770.7	1.33689	0.0499799	0.180052	0.303614	-1.71969	down	-	-
MW0157788	Thr-Pro-Ser-Cys-Asn	Thr-Pro-Ser-Cys-Asn	Amino acids and derivatives	氨基酸及其衍生物	Amino acids and derivatives	氨基酸及其衍生物	C19H32N6O9S	2	0.7516	-	344948	289552	375292	144079	158748	174618	1.4266	0.0120611	0.0981816	2.11499	1.08065	up	-	-
MW0153121	Lys-Pro-Tyr	L-赖氨酸-L-脯氨酸-L-酪氨酸	Amino acids and derivatives	氨基酸及其衍生物	Amino acids and derivatives	氨基酸及其衍生物	C20H30N4O5	2	0.7516	-	297774	240369	287642	40502.8	38629.6	29099.3	1.45357	0.004158	0.0706707	7.6298	2.93164	up	-	-
MW0157623	Thr-Glu-Asn-Glu-Val	Thr-Glu-Asn-Glu-Val	Amino acids and derivatives	氨基酸及其衍生物	Amino acids and derivatives	氨基酸及其衍生物	C23H38N6O12	2	0.7505	-	65257.6	77842	113684	31689.1	34482.3	43076.1	1.3454	0.0700487	0.213524	2.35048	1.23295	up	-	-
MW0137931	Deoxysappanone B trimethyl ether	Deoxysappanone B trimethyl ether	Others	其它类	Ketone compounds	酮类化合物	C19H20O5	2	0.7498	-	60210.3	37517.5	87809.2	28112.7	29694.4	19773	1.23773	0.126202	0.289889	2.39155	1.25795	up	-	-
MW0153203	Lys-Val-Ile-Arg	Lys-Val-Ile-Arg	Amino acids and derivatives	氨基酸及其衍生物	Amino acids and derivatives	氨基酸及其衍生物	C23H46N8O5	2	0.749	-	2998.52	5733.5	2687.07	12619	15280.5	12730.3	1.38288	0.00178172	0.0515007	0.281052	-1.83109	down	-	-
MW0159000	Val-Glu-Thr-Glu	Val-Glu-Thr-Glu	Amino acids and derivatives	氨基酸及其衍生物	Amino acids and derivatives	氨基酸及其衍生物	C19H32N4O10	2	0.7489	-	145184	165019	105776	233273	336388	296788	1.33719	0.0198448	0.117599	0.480096	-1.05861	down	-	-
MW0149998	Glu-Glu-Phe-Leu-Val	谷氨酸-谷氨酸-苯丙氨酸-亮氨酸-缬氨酸	Amino acids and derivatives	氨基酸及其衍生物	Amino acids and derivatives	氨基酸及其衍生物	C30H45N5O10	2	0.7489	-	19221.5	20161.3	18458.3	42400	44556.3	48711.6	1.45501	0.00315532	0.0665633	0.426343	-1.22991	down	-	-
MW0154292	Nap-Phe-OH	Nap-Phe-OH	Amino acids and derivatives	氨基酸及其衍生物	Amino acids and derivatives	氨基酸及其衍生物	C27H22N2O6	2	0.7488	-	17861.6	15601.5	19755	8408.33	9856.37	5409.12	1.33754	0.00529495	0.0752923	2.24797	1.16862	up	-	-
MW0155826	Pro-Gln-Ala	脯氨酰-谷氨酰胺-丙氨酸	Amino acids and derivatives	氨基酸及其衍生物	Amino acids and derivatives	氨基酸及其衍生物	C13H22N4O5	2	0.7486	-	46977.5	45898.4	11814.6	123456	106261	133209	1.24546	0.00526527	0.0752923	0.288462	-1.79355	down	-	-
MW0159154	Val-Ser-Glu-Ala-Gly	Val-Ser-Glu-Ala-Gly	Amino acids and derivatives	氨基酸及其衍生物	Amino acids and derivatives	氨基酸及其衍生物	C18H31N5O9	2	0.7473	-	86194.6	76966.6	61008.3	246656	134856	173413	1.34237	0.0717518	0.216373	0.403964	-1.3077	down	-	-
MW0146218	Asp-Phe-Gln-Lys-Lys	Asp-Phe-Gln-Lys-Lys	Amino acids and derivatives	氨基酸及其衍生物	Amino acids and derivatives	氨基酸及其衍生物	C30H48N8O9	2	0.7471	-	8423.4	4910.73	9491.23	1576.48	1197.87	2073.9	1.39394	0.0453715	0.171399	4.70796	2.2351	up	-	-
MW0152229	Leu-Arg-Lys-Arg	Leu-Arg-Lys-Arg	Amino acids and derivatives	氨基酸及其衍生物	Amino acids and derivatives	氨基酸及其衍生物	C24H49N11O5	2	0.7456	-	202102	343039	191741	74949.3	134140	82852.8	1.26856	0.0787211	0.225612	2.52407	1.33575	up	-	-
MW0159020	Val-His-Glu-Lys-Ala	Val-His-Glu-Lys-Ala	Amino acids and derivatives	氨基酸及其衍生物	Amino acids and derivatives	氨基酸及其衍生物	C25H42N8O8	2	0.7455	-	57003.7	64728.9	26897.6	3813.13	3152.76	27856	1.13607	0.0614366	0.198291	4.2683	2.09366	up	-	-
MW0150014	Glu-Gly-Lys-Tyr-Glu	谷氨酸-甘氨酸-赖氨酸-酪氨酸-谷氨酸	Amino acids and derivatives	氨基酸及其衍生物	Amino acids and derivatives	氨基酸及其衍生物	C27H40N6O11	2	0.7448	-	431498	632163	709959	271281	261927	252482	1.36958	0.0574069	0.191445	2.25741	1.17467	up	-	-
MW0138976	Mollicellin I	莫利西林 I	Benzene and substituted derivatives	苯及其衍生物	Benzene and substituted derivatives	苯及其衍生物	C21H22O6	2	0.7446	-	43106.3	51195.9	48401	27519	20959.4	14182.8	1.32275	0.00722366	0.0842626	2.27738	1.18737	up	-	-
MW0155306	Phe-Phe-Thr	苯丙氨酰-苯丙氨酰-苏氨酸	Amino acids and derivatives	氨基酸及其衍生物	Amino acids and derivatives	氨基酸及其衍生物	C22H27N3O5	2	0.7444	-	32245.1	21974.9	28194.3	9166.3	3757.13	12215.5	1.26218	0.00863209	0.0910294	3.27836	1.71297	up	-	-
MW0120565	4-Hydroxy Triamterene	对羟基三苯甲基	Benzene and substituted derivatives	苯及其衍生物	Benzene and substituted derivatives	苯及其衍生物	C12H11N7O	2	0.7442	-	157159	145260	199623	65520.9	66578.7	54818.1	1.4326	0.0195607	0.116836	2.6859	1.42541	up	-	-
MW0155464	Phe-Nap-OH	Phe-Nap-OH	Amino acids and derivatives	氨基酸及其衍生物	Amino acids and derivatives	氨基酸及其衍生物	C27H22N2O6	2	0.7438	-	5206.68	6079.61	18949.7	26677.8	16140.2	32068.7	1.08441	0.0824643	0.230493	0.403756	-1.30844	down	-	-
MW0146318	Asp-Val-Glu	Asp-Val-Glu	Amino acids and derivatives	氨基酸及其衍生物	Amino acids and derivatives	氨基酸及其衍生物	C14H23N3O8	2	0.7426	-	285402	362741	298187	124802	169859	111860	1.38342	0.00491952	0.0738723	2.32787	1.21901	up	-	-
MW0149611	Gln-Ala-Glu-Asp	谷酰氨-丙氨酸-谷氨酸-天冬氨酸	Amino acids and derivatives	氨基酸及其衍生物	Amino acids and derivatives	氨基酸及其衍生物	C17H27N5O10	2	0.7413	-	21614.9	25805.8	26096.3	10737.7	4718.38	11509.3	1.27614	0.00587247	0.0778901	2.72635	1.44697	up	-	-
MW0145846	Asn-Met-Ser	L-天冬酰胺-L-甲硫氨酰-L-丝氨酸	Amino acids and derivatives	氨基酸及其衍生物	Amino acids and derivatives	氨基酸及其衍生物	C12H22N4O6S1	2	0.7402	-	48577	73087.7	127707	36580.2	47531.2	24333.3	1.12496	0.175085	0.35017	2.29953	1.20134	up	-	-
MW0168389	[(2S,6S,10S,12R,13S,14S,15S,16S,17R,18R,19S,22S,23S,25R)-16,17-diacetyloxy-10,12,14,23-tetrahydroxy-6,10,19-trimethyl-13-[(2R)-2-methylbutanoyl]oxy-24-oxa-4-azaheptacyclo[12.12.0.02,11.04,9.015,25.018,23.019,25]hexacosan-22-yl] (2S,3R)-2,3-dihydroxy-2-methylbutanoate	[(2S,6S,10S,12R,13S,14S,15S,16S,17R,18R,19S,22S,23S,25R)-16,17-二乙酰氧基-10,12,14,23-四羟基-6,10 ,19-trimethyl-13-[(2R)-2-methylbutanoyl]oxy-24-oxa-4-azaheptacyclo[12.12.0.02,11.04,9.015,25.018,23.019,25]hexacosan-22-yl] (2S,3R )-2,3-二羟基-2-甲基丁酸酯	Others	其它类	Lactones	内酯类化合物	C41H63NO15	2	0.7399	-	149549	140268	159836	43271.2	51290.6	35774.1	1.44385	0.000169663	0.0273488	3.44995	1.78658	up	C10816	-
MW0150428	Gly-Lys-Thr-Ser-Glu	甘氨酸-赖氨酸-苏氨酸-丝氨酸-谷氨酸	Amino acids and derivatives	氨基酸及其衍生物	Amino acids and derivatives	氨基酸及其衍生物	C20H36N6O10	2	0.7398	-	19002.3	20921.5	18797.8	69708.4	55130.7	78012	1.44439	0.0180045	0.115392	0.289481	-1.78846	down	-	-
MW0158358	Tyr-Ala-Leu-Asp	酪氨酸-丙氨酸-亮氨酸-天冬氨酸	Amino acids and derivatives	氨基酸及其衍生物	Amino acids and derivatives	氨基酸及其衍生物	C22H32N4O8	2	0.7394	-	19274.5	10860.3	65869.4	4967.37	9371.42	1142.44	1.11744	0.25589	0.426836	6.20132	2.63258	up	-	-
MW0148087	Cys-Val-Ala	半胱氨酸-缬氨酸-丙氨酸	Amino acids and derivatives	氨基酸及其衍生物	Amino acids and derivatives	氨基酸及其衍生物	C11H21N3O4S1	2	0.7388	-	5319.43	6456.52	7328.09	27201.5	23513.4	12558.6	1.33485	0.076355	0.222682	0.301928	-1.72772	down	-	-
MW0157608	Thr-Gln-Glu-Asp	Thr-Gln-Glu-Asp	Amino acids and derivatives	氨基酸及其衍生物	Amino acids and derivatives	氨基酸及其衍生物	C18H29N5O11	2	0.7383	-	196687	207201	177168	549631	436128	520094	1.44657	0.00853277	0.0903928	0.385865	-1.37383	down	-	-
MW0145944	Asn-Val-Asp-Glu-Val	Asn-Val-Asp-Glu-Val	Amino acids and derivatives	氨基酸及其衍生物	Amino acids and derivatives	氨基酸及其衍生物	C23H38N6O11	2	0.7382	-	73943.1	66706.7	69342.1	192431	179374	206335	1.45495	0.0023646	0.0591861	0.36322	-1.46109	down	-	-
MW0149771	Gln-Phe-Asn	谷酰氨-苯丙氨酸-天门冬酰氨	Amino acids and derivatives	氨基酸及其衍生物	Amino acids and derivatives	氨基酸及其衍生物	C18H25N5O6	2	0.7379	-	27484.8	28848.2	29534.6	77847.4	53303.2	44974	1.32515	0.0922813	0.244817	0.487539	-1.03641	down	-	-
MW0138447	Irigenin, 7-benzyl ether	IRIGENIN，7-苄基醚	Flavonoids	黄酮	Flavones	黄酮	C25H22O8	2	0.7377	-	2123.45	3438.89	12249.7	47200.6	37663.2	18511.8	1.2375	0.063015	0.201093	0.172304	-2.53697	down	-	-
MW0158539	Tyr-Lys-Glu-Arg	酪氨酸-赖氨酸-谷氨酸-精氨酸	Amino acids and derivatives	氨基酸及其衍生物	Amino acids and derivatives	氨基酸及其衍生物	C26H42N8O8	2	0.7371	-	12780	29069	33220.8	9460.53	11149.7	13809.4	1.09721	0.157291	0.329571	2.18102	1.125	up	-	-
MW0158487	Tyr-His-Phe	酪氨酸-组氨酸-苯丙氨酸	Amino acids and derivatives	氨基酸及其衍生物	Amino acids and derivatives	氨基酸及其衍生物	C24H27N5O5	2	0.7364	-	74988.3	110936	112840	19948	41928.9	24389.4	1.36152	0.0139102	0.103316	3.46328	1.79214	up	-	-
MW0146040	Asp-Asn-Ile	L-天冬氨酰-L-天冬酰胺酰-L-异亮氨酸	Amino acids and derivatives	氨基酸及其衍生物	Amino acids and derivatives	氨基酸及其衍生物	C14H24N4O7	2	0.7364	-	271300	159844	182541	58160.9	35981.2	88173.2	1.31275	0.0354961	0.152754	3.36606	1.75106	up	-	-
MW0146149	Asp-Ile-Ile-Tyr-Ala	Asp-Ile-Ile-Tyr-Ala	Amino acids and derivatives	氨基酸及其衍生物	Amino acids and derivatives	氨基酸及其衍生物	C28H43N5O9	2	0.7363	-	1392.41	3115.93	1913.05	16052.4	12463.9	11292.7	1.41659	0.00948745	0.0931345	0.161305	-2.63214	down	-	-
MW0153830	Methylcarbamyl PAF C-8	Methylcarbamyl PAF C-8	Others	其它类	Lactones	内酯类化合物	C18H39N2O7P	2	0.7361	-	98351.9	70621.9	72007.7	14139	12638.4	11617.2	1.44864	0.0168688	0.111733	6.27643	2.64995	up	-	-
MW0146194	Asp-Lys-Ser-Cys-Ala	Asp-Lys-Ser-Cys-Ala	Amino acids and derivatives	氨基酸及其衍生物	Amino acids and derivatives	氨基酸及其衍生物	C19H34N6O9S	2	0.7343	-	10150	11376.7	15642.1	41541.1	24970.6	35990.3	1.35704	0.0354044	0.152531	0.362615	-1.46349	down	-	-
MW0058017	1-Tetradecanoyl-2-pentadecanoyl-glycero-3-phosphoethanolamine	PE(14:0/15:0)	GP	甘油磷脂类	PE	磷脂酰乙醇胺	C34H68NO8P	2	0.7342	-	2349.34	5170.19	2311.94	9591.19	7180	6330.99	1.25117	0.0313405	0.145565	0.425565	-1.23255	down	-	-
MW0151511	Ile-Lys-Gly-Lys-Leu	Ile-Lys-Gly-Lys-Leu	Amino acids and derivatives	氨基酸及其衍生物	Amino acids and derivatives	氨基酸及其衍生物	C26H51N7O6	2	0.7325	-	27516.5	45592.8	49389.7	22223.3	14101.7	21370.2	1.2345	0.0705409	0.214389	2.12321	1.08625	up	-	-
MW0157770	Thr-Phe-Thr	苏氨酸-苯丙氨酸-苏氨酸	Amino acids and derivatives	氨基酸及其衍生物	Amino acids and derivatives	氨基酸及其衍生物	C17H25N3O6	2	0.7313	-	36342.6	39067.5	35039.6	17519.3	14208.7	13056.4	1.42746	0.000277368	0.029247	2.46625	1.30232	up	-	-
MW0153505	Met-Asn-Gly	L-蛋氨酸-L-天冬酰胺-L-甘氨酸	Amino acids and derivatives	氨基酸及其衍生物	Amino acids and derivatives	氨基酸及其衍生物	C11H20N4O5S1	2	0.7295	-	197874	144915	241897	74905.2	78512.3	86526.1	1.39132	0.0527381	0.183984	2.43676	1.28497	up	-	-
MW0152375	Leu-Ile-Glu-Glu	Leu-Ile-Glu-Glu	Amino acids and derivatives	氨基酸及其衍生物	Amino acids and derivatives	氨基酸及其衍生物	C22H38N4O9	2	0.7286	-	17731.1	20004.3	6039.83	85762.9	36322.2	26446.4	1.1371	0.192382	0.366141	0.29472	-1.76258	down	-	-
MW0153671	Met-Thr-Asn	蛋氨酸-苏氨酸-天冬氨酸	Amino acids and derivatives	氨基酸及其衍生物	Amino acids and derivatives	氨基酸及其衍生物	C13H24N4O6S1	2	0.7279	-	44.4	464.06	166.52	1415.34	30882	9563.15	1.2641	0.258524	0.429177	0.0161245	-5.9546	down	-	-
MW0146152	Asp-Ile-Lys-Glu-Met	Asp-Ile-Lys-Glu-Met	Amino acids and derivatives	氨基酸及其衍生物	Amino acids and derivatives	氨基酸及其衍生物	C26H46N6O10S	2	0.7273	-	28820.9	27615.2	36918.7	7517.73	6471.83	5452.25	1.44643	0.0112439	0.0965916	4.80176	2.26356	up	-	-
MW0155126	Phe-Asp-Glu-Phe-Leu	Phe-Asp-Glu-Phe-Leu	Amino acids and derivatives	氨基酸及其衍生物	Amino acids and derivatives	氨基酸及其衍生物	C33H43N5O10	2	0.7264	-	66113.2	73131.5	59675.8	16094.8	14529.9	43967.3	1.22301	0.0350113	0.151825	2.66678	1.4151	up	-	-
MW0157029	Ser-Trp	L-丝氨酸-L-色氨酸	Amino acids and derivatives	氨基酸及其衍生物	Amino acids and derivatives	氨基酸及其衍生物	C14H17N3O4	2	0.7255	-	26238.5	19844.7	26271.5	12543.3	6869.64	7516.48	1.35251	0.00608169	0.0794679	2.68682	1.4259	up	-	-
MW0152558	Leu-Val-Arg-Lys	Leu-Val-Arg-Lys	Amino acids and derivatives	氨基酸及其衍生物	Amino acids and derivatives	氨基酸及其衍生物	C23H46N8O5	2	0.7253	-	20616.5	18391.9	21106.6	5433.46	10445.1	13380.7	1.21101	0.0352552	0.152389	2.05456	1.03883	up	-	-
MW0149677	Gln-Glu-Asp-Glu-Arg	谷酰氨-谷氨酸-天门冬氨酸-谷氨酸-精氨酸	Amino acids and derivatives	氨基酸及其衍生物	Amino acids and derivatives	氨基酸及其衍生物	C25H41N9O13	2	0.7249	-	130083	133326	87608.9	17320	10614	68309.8	1.17834	0.0239504	0.128921	3.64716	1.86678	up	-	-
MW0145264	Arg-Arg-Phe	L-精氨酰-L-精氨酰-L-苯丙氨酸	Amino acids and derivatives	氨基酸及其衍生物	Amino acids and derivatives	氨基酸及其衍生物	C21H35N9O4	2	0.7246	-	40474	73793.5	116084	343636	243221	136821	1.19143	0.0968394	0.252655	0.318306	-1.65151	down	-	-
MW0144569	Ala-Glu-Phe-His-Phe	Ala-Glu-Phe-His-Phe	Amino acids and derivatives	氨基酸及其衍生物	Amino acids and derivatives	氨基酸及其衍生物	C32H39N7O8	2	0.7245	-	1478.27	3017.91	3155.39	19327.2	11759.2	10476.8	1.37584	0.0501691	0.180266	0.184095	-2.44148	down	-	-
MW0156004	Pro-Thr-His	脯氨酰-苏氨酰-组氨酸	Amino acids and derivatives	氨基酸及其衍生物	Amino acids and derivatives	氨基酸及其衍生物	C15H23N5O5	2	0.7245	-	53302.7	109872	37253.1	217709	177463	149670	1.26719	0.0182282	0.115392	0.367865	-1.44275	down	-	-
MW0155789	Pro-Asn-Ala	脯氨酰-天冬酰胺基-丙氨酸	Amino acids and derivatives	氨基酸及其衍生物	Amino acids and derivatives	氨基酸及其衍生物	C12H20N4O5	2	0.7232	-	61805.2	294942	318551	565370	505148	639160	1.06421	0.034844	0.151809	0.394985	-1.34013	down	-	-
MW0146027	Asp-Arg-Lys-Lys	Asp-Arg-Lys-Lys	Amino acids and derivatives	氨基酸及其衍生物	Amino acids and derivatives	氨基酸及其衍生物	C22H43N9O7	2	0.722	-	469538	424373	466553	93271.4	132802	157127	1.42441	0.000225865	0.0275633	3.55027	1.82793	up	-	-
MW0156023	Pro-Tyr-Ala-Tyr-Asp	Pro-Tyr-Ala-Tyr-Asp	Amino acids and derivatives	氨基酸及其衍生物	Amino acids and derivatives	氨基酸及其衍生物	C30H37N5O10	2	0.7186	-	17699.9	15912.9	33088.3	83598.4	29173.1	101108	1.12446	0.144788	0.314521	0.311864	-1.68101	down	-	-
MW0151108	His-Trp-Asn	L-组氨酸-L-色氨酸-L-天冬酰胺	Amino acids and derivatives	氨基酸及其衍生物	Amino acids and derivatives	氨基酸及其衍生物	C21H25N7O5	2	0.7179	-	191194	132087	159400	67861.3	73301.5	67093.1	1.41869	0.0317287	0.146584	2.31773	1.21271	up	-	-
MW0110148	Trunkamide	Trunkamide A	Alcohol and amines	醇、胺类	Amines	胺类	C43H63N7O8S	2	0.7177	-	1.30566e+06	1.32705e+06	1.26337e+06	589972	653769	677532	1.45045	7.06593e-05	0.0239556	2.02787	1.01996	up	-	-
MW0151607	Ile-Thr-Tyr-Asp	Ile-Thr-Tyr-Asp	Amino acids and derivatives	氨基酸及其衍生物	Amino acids and derivatives	氨基酸及其衍生物	C23H34N4O9	2	0.717	-	141758	131678	183608	62995.8	64744.1	50859.2	1.42075	0.0217829	0.121749	2.55905	1.35561	up	-	-
MW0158237	Trp-Ser-Asp	色氨酸-丝氨酸-天冬氨酸	Amino acids and derivatives	氨基酸及其衍生物	Amino acids and derivatives	氨基酸及其衍生物	C18H22N4O7	2	0.7163	-	9059.48	10809.3	4823.46	1535.27	1392.08	4937.89	1.15505	0.067039	0.209893	3.13942	1.6505	up	-	-
MW0014275	3'-p-Hydroxypaclitaxel	3′-对羟基紫杉醇	Phenolic acids	酚酸类	Phenolic acids	酚酸类	C47H51NO15	2	0.7156	-	81182.6	53119.2	47660.2	13771.9	16462.7	17985.8	1.4076	0.0484267	0.176651	3.77355	1.91592	up	-	-
MW0146050	Asp-Asp-Asn-Arg-Glu	Asp-Asp-Asn-Arg-Glu	Amino acids and derivatives	氨基酸及其衍生物	Amino acids and derivatives	氨基酸及其衍生物	C23H37N9O13	2	0.714	-	22165.9	18567.4	7726.5	36658.6	26023.4	38388.4	1.13667	0.0399304	0.161532	0.479465	-1.0605	down	-	-
MW0157869	Thr-Val-Phe	苏氨酸-缬氨酸-苯丙氨酸	Amino acids and derivatives	氨基酸及其衍生物	Amino acids and derivatives	氨基酸及其衍生物	C18H27N3O5	2	0.7091	-	113973	100927	105193	22101.7	31897.1	27504.2	1.4462	0.000133865	0.0273488	3.92738	1.97357	up	-	-
MW0146080	Asp-Gln-Gln-Ala-Glu	Asp-Gln-Gln-Ala-Glu	Amino acids and derivatives	氨基酸及其衍生物	Amino acids and derivatives	氨基酸及其衍生物	C22H35N7O12	2	0.7082	-	181080	225884	221593	87241.8	106194	100218	1.42371	0.00851003	0.0903582	2.14047	1.09793	up	-	-
MW0149759	Gln-Lys-Lys-Leu-Ala	谷酰氨-赖氨酸-赖氨酸-亮氨酸-丙氨酸	Amino acids and derivatives	氨基酸及其衍生物	Amino acids and derivatives	氨基酸及其衍生物	C26H50N8O7	2	0.705	-	1184.91	7462.43	21521.6	99120.5	66380.5	18377.2	1.06657	0.153571	0.326845	0.16407	-2.60761	down	-	-
MW0153666	Met-Ser-Ser	甲硫氨酰丝氨酸	Amino acids and derivatives	氨基酸及其衍生物	Amino acids and derivatives	氨基酸及其衍生物	C11H21N3O6S1	2	0.7047	-	348212	363495	219528	133974	89005.1	119867	1.33682	0.0411876	0.163346	2.71619	1.44158	up	-	-
MW0150520	Gly-Tyr-Phe	甘氨酸-酪氨酸-苯丙氨酸	Amino acids and derivatives	氨基酸及其衍生物	Amino acids and derivatives	氨基酸及其衍生物	C20H23N3O5	2	0.7044	-	19288.7	20459.7	14700.2	43245.6	43138.4	40948.1	1.43097	0.00172859	0.0510869	0.427611	-1.22563	down	-	-
MW0156983	Ser-Val-Phe	丝氨酰-缬氨酰-苯丙氨酸	Amino acids and derivatives	氨基酸及其衍生物	Amino acids and derivatives	氨基酸及其衍生物	C17H25N3O5	2	0.7043	-	96485.4	76212.2	58248.6	31786.1	17173.1	32853.9	1.30324	0.0299941	0.141868	2.82285	1.49715	up	-	-
MW0154298	Nap-Val-OH	Nap-Val-OH	Amino acids and derivatives	氨基酸及其衍生物	Amino acids and derivatives	氨基酸及其衍生物	C23H22N2O6	2	0.7042	-	187311	184808	195126	517295	445188	385917	1.43324	0.0200509	0.117808	0.42068	-1.2492	down	-	-
MW0158942	Val-Asp-Pro-Val-Asn	Val-Asp-Pro-Val-Asn	Amino acids and derivatives	氨基酸及其衍生物	Amino acids and derivatives	氨基酸及其衍生物	C23H38N6O9	2	0.7004	-	42176.5	45327	25756.2	6924.34	4021.67	15544.2	1.2708	0.0228682	0.125807	4.27553	2.0961	up	-	-
MW0015337	methyl (13E)-11,16-dihydroxy-16-methyl-9-oxoprost-13-en-1-oate	methyl (13E)-11,16-dihydroxy-16-methyl-9-oxoprost-13-en-1-oate	Lipids	脂质	Free fatty acids	游离脂肪酸	C22H38O5	3	0.9953	-	92022.9	81226.6	57374.5	16839.5	22107	36843.7	1.3173	0.0192863	0.11637	3.04293	1.60546	up	-	-
MW0156143	Pro-TGF-alpha	Pro-TGF-alpha	Amino acids and derivatives	氨基酸及其衍生物	Amino acids and derivatives	氨基酸及其衍生物	C52H87N15O17	3	0.9909	-	1.357e+06	834544	1.40485e+06	447768	581839	530252	1.34828	0.0596259	0.195109	2.30559	1.20514	up	-	-
MW0013164	NCGC00381336-01_C33H50O21_2,6-Anhydro-5-O-[4-({6-O-[4-(beta-D-glucopyranosyloxy)-2-methylenebutanoyl]-beta-D-glucopyranosyl}oxy)-2-methylenebutanoyl]-1-O-(4-hydroxy-2-methylenebutanoyl)hexitol	NCGC00381336-01_C33H50O21_2,6-Anhydro-5-O-[4-({6-O-[4-(β-D-吡喃葡萄糖基)-2-亚甲基丁酰基]-β-D-吡喃葡萄糖基}氧基)-2-亚甲基丁酰基] -1-O-(4-羟基-2-亚甲基丁酰基)己糖醇	Alcohol and amines	醇、胺类	Alcohols	醇类	C33H50O21	3	0.9855	-	5704.97	5138.03	7173.7	18425.6	11559.7	9488.07	1.2578	0.11155	0.270848	0.456427	-1.13154	down	-	-
MW0161765	coproporphyrinogen III(4-)	coproporphyrinogen III(4-)	Others	其它类	Lactones	内酯类化合物	C36H40N4O8-4	3	0.9855	-	1.35615e+06	1.48049e+06	1.48755e+06	537955	584616	971523	1.31186	0.0242554	0.12925	2.06494	1.0461	up	-	-
MW0011238	2-(hydroxymethyl)-6-[(E)-4-(1,2,4-trihydroxy-2,6,6-trimethylcyclohexyl)but-3-en-2-yl]oxyoxane-3,4,5-triol	2-(羟甲基)-6-[(E)-4-(1,2,4-trihydroxy-2,6,6-trimethylcyclohexyl)but-3-en-2-yl]oxyoxane-3,4,5-三醇	Others	其它类	Saccharides	糖类	C19H34O9	3	0.9829	-	59705.3	44298.7	58098.6	2149.61	3965.28	3089.25	1.45231	0.00849523	0.0903582	17.6119	4.13848	up	-	-
MW0165073	fusicoccin P	褐藻素P	Alcohol and amines	醇、胺类	Alcohols	醇类	C27H44O9	3	0.9746	-	24281.6	29726.8	101493	470910	416621	127588	1.22356	0.108086	0.265196	0.153186	-2.70665	down	-	-
MW0110465	(3S,4S,7S,10S)-4-[(2-hydroxy-4-methylpentanoyl)amino]-7-(2-methylpropyl)-5,8-dioxo-3-propan-2-yl-2-oxa-6,9-diazabicyclo[10.2.2]hexadeca-1(14),12,15-triene-10-carboxylic acid	(3S,4S,7S,10S)-4-[(2-羟基-4-甲基戊酰基)氨基]-7-(2-甲基丙基)-5,8-dioxo-3-propan-2-yl-2-oxa -6,9-二氮杂双环[10.2.2]hexadeca-1(14),12,15-triene-10-甲酸	Organic acids	有机酸	Organic acids	有机酸	C27H41N3O7	3	0.9743	-	4633	4358.36	7686.78	26474.7	20382.1	18425.2	1.39088	0.0112829	0.0965916	0.255478	-1.96873	down	-	-
MW0010628	Myricatomentoside I	肉豆蔻苷 I	Benzene and substituted derivatives	苯及其衍生物	Benzene and substituted derivatives	苯及其衍生物	C26H32O10	3	0.9736	-	230774	193846	217661	635686	750171	750169	1.44719	0.00349685	0.0665633	0.30069	-1.73365	down	-	-
MW0128622	[2-hydroxy-5-(5,6,7-trihydroxy-4-oxo-4H-chromen-2-yl)phenyl]oxidanesulfonic acid	[2-羟基-5-(5，6，7-三羟基-4-氧代-4H-苯并吡喃-2-基）苯基]氧代磺酸	Organic acids	有机酸	Organic acids	有机酸	C15H10O10S	3	0.9716	-	5905.83	6481.37	4808.55	20738.7	12026	18718.8	1.39139	0.0450464	0.170563	0.334005	-1.58206	down	-	-
MW0155585	Piperazine, 2-hydroxy-1,2,3-propanetricarboxylate (3:2)	哌嗪，2-羟基-1,2,3-丙烷三羧酸酯 (3:2)	Organic acids	有机酸	Organic acids	有机酸	C24H46N6O14	3	0.9698	-	12399.1	11471.7	4683.66	26893.8	21294.7	26493.7	1.2656	0.00877288	0.091316	0.382347	-1.38705	down	-	-
ZINC85648309	(1S,4R,10S,13S,16S,19S)-27-methoxy-13-[(4-methoxyphenyl)methyl]-4,12,16,18,32-pentamethyl-25-oxa-3,6,12,15,18,32-hexazapentacyclo[17.12.2.221,24.126,30.06,10]hexatriaconta-21,23,26,28,30(34),35-hexaene-2,5,7,11,14,17,33-heptone	（1S，4R，10S，13S，16S，19S)-27-甲氧基-13-[（4-甲氧基苯基）甲基]-4，12，16，18，32-五甲基-25-氧杂-3，6，12，15，18，32-六氮杂五环[17.1 2.2.221，24.126，30.06，10]六三正二十烷-21，23，26，28，30（34）35-六烯-2，5，7，11，14，17，	Lignans and Coumarins	木脂素和香豆素	Lignans	木脂素	C43H50N6O10	3	0.9655	-	243543	284142	374670	54829.9	61080.1	36171.3	1.43074	0.0200577	0.117808	5.93337	2.56885	up	-	-
ZINC85530353	N2-Methylfangchinoline	N2-Methylfangchinoline	Lignans and Coumarins	木脂素和香豆素	Lignans	木脂素	C38H43N2O6+	3	0.9573	-	71710.5	64483	86273.6	21981.7	21168.9	37657.4	1.36622	0.00529442	0.0752923	2.75303	1.46102	up	-	-
MW0054983	MG(0:0/21:0/0:0)	MG(0:0/21:0/0:0)	GL	甘油脂类	MG	单甘油酯	C24H48O4	3	0.9559	-	574.93	1022.85	530.21	1282.01	2084.18	1139.95	1.19165	0.0961508	0.251365	0.472242	-1.0824	down	-	-
MW0151088	His-Ser-Val	L-组氨酸-L-丝氨酸-L-缬氨酸	Amino acids and derivatives	氨基酸及其衍生物	Amino acids and derivatives	氨基酸及其衍生物	C14H23N5O5	3	0.9457	-	117986	117833	124272	299873	283811	278168	1.45789	0.000586287	0.0357943	0.41781	-1.25908	down	-	-
MW0114594	Hexapropylene glycol monobutyl ether	六丙二醇单丁醚	Alcohol and amines	醇、胺类	Alcohols	醇类	C22H46O7	3	0.9259	-	45430.1	72521.6	67071.4	98627.7	621118	273518	1.15159	0.221148	0.396494	0.186278	-2.42447	down	-	-
MW0056825	PC(14:1(9Z)/18:4(6Z,9Z,12Z,15Z))	PC(14:1(9Z)/18:4(6Z,9Z,12Z,15Z))	GP	甘油磷脂类	PC	磷脂酰胆碱	C40H70NO8P	3	0.909	-	12796.2	13083.6	27531.8	179500	251362	181893	1.41872	0.0128165	0.100412	0.0871665	-3.52008	down	-	-
MW0138049	ent-Epiafzelechin(2a->7,4a->8)epiafzelechin 3-(4-hydroxybenzoic acid)	ent-Epiafzelechin(2a->7,4a->8)epiafzelechin 3-(4-羟基苯甲酸)	Flavonoids	黄酮	Flavanols	黄烷醇类	C37H28O12	3	0.9012	-	5061.29	5729.71	6205.58	14003.3	14661.7	14887.2	1.44662	4.52439e-05	0.0181342	0.390258	-1.3575	down	-	-
MW0011813	1-(6Z,9Z,12Z,15Z-octadecatetraenoyl)-glycero-3-phosphate	1-(6Z,9Z,12Z,15Z-十八碳四烯酰基)-甘油-3-磷酸	GP	甘油磷脂类	PA	磷脂酸	C21H35O7P	3	0.8982	-	51847.6	43159.1	43882.5	10880.8	6824.8	5697.43	1.42508	0.000957116	0.042453	5.93468	2.56917	up	-	-
ZINC85493813	2-(1,7-Dihydroxy-6,8-dimethoxy-3-methyl-5-propan-2-ylnaphthalen-2-yl)-6,8-dimethoxy-3-methyl-5-propan-2-ylnaphthalene-1,7-diol	2-(1，7-二羟基-6，8-二甲氧基-3-甲基-5-丙-2-基萘-2-基)-6，8-二甲氧基-3-甲基-5-丙-2-基萘-1，7-二醇	Benzene and substituted derivatives	苯及其衍生物	Benzene and substituted derivatives	苯及其衍生物	C32H38O8	3	0.8923	-	5019.34	11649.6	9960.12	21812.4	17993.6	24398.2	1.26563	0.010146	0.0939674	0.414756	-1.26967	down	-	-
ZINC27106416	Siphonol A	[（2R，4R，4aS，4bS，5R，6S，7S，8aS，10R，10aR)-6，7，10-三乙酰氧基-5-苯甲酰氧基-2-乙烯基-10a-羟基-4b-(羟甲基)-2，8，8-三甲基-1-氧代-4，4A，5，6，7，8A，9，10-八氢-3H-菲-4-基]苯甲酸酯	Benzene and substituted derivatives	苯及其衍生物	Benzene and substituted derivatives	苯及其衍生物	C40H46O13	3	0.8849	-	23777.2	27283.3	23655.5	15637.2	3817.99	10644.5	1.12925	0.0375577	0.156497	2.48228	1.31167	up	-	-
ZINC95914198	3alpha-Hydroxy-28-noroleana-11,13(18),17(22)-triene-21-one	3alpha-Hydroxy-28-noroleana-11,13(18),17(22)-triene-21-one	Others	其它类	Ketone compounds	酮类化合物	C29H42O2	3	0.8727	-	40079.3	84206.2	84726.8	167854	226839	164093	1.29031	0.0120521	0.0981816	0.374047	-1.41871	down	-	-
MW0150183	Glu-Tyr-Arg-Asp	谷氨酸-酪氨酸-精氨酸-天门冬氨酸	Amino acids and derivatives	氨基酸及其衍生物	Amino acids and derivatives	氨基酸及其衍生物	C24H35N7O10	3	0.8713	-	2472.97	2410.39	938.83	8171.05	4984.28	4551.93	1.25877	0.0566825	0.190395	0.328802	-1.60471	down	-	-
MW0010963	(E)-2-methyl-6-(4,4,8,10,14-pentamethyl-3-oxo-5,6,7,9,11,15,16,17-octahydrocyclopenta[a]phenanthren-17-yl)hept-2-enoic acid	(E)-2-methyl-6-(4,4,8,10,14-pentamethyl-3-oxo-5,6,7,9,11,15,16,17-octahydrocyclopenta[a]phenanthren-17 -基)庚-2-烯酸	Organic acids	有机酸	Organic acids	有机酸	C30H44O3	3	0.8607	-	6220.92	8229.72	14264.1	21600.9	31489.6	12247.4	1.0658	0.146273	0.315745	0.439481	-1.18613	down	-	-
MW0145503	Arg-Ser-Thr	L-精氨酰-L-丝氨酰-L-苏氨酸	Amino acids and derivatives	氨基酸及其衍生物	Amino acids and derivatives	氨基酸及其衍生物	C13H26N6O6	3	0.8605	-	32607.8	30104.5	20845.8	5355.85	6548.14	10040.7	1.37779	0.0182289	0.115392	3.80767	1.92891	up	-	-
MW0016578	CDP-DG(a-13:0/a-17:0)	CDP-DG(a-13:0/a-17:0)	GL	甘油脂类	DG	甘油二酯	C42H77N3O15P2	3	0.8424	-	5729.84	12980.5	3932.1	14613.9	31437.8	37532	1.22746	0.0818468	0.230053	0.270895	-1.88419	down	-	-
MW0010733	VERBENONE	马鞭草烯酮	Terpenoids	萜类	Monoterpenoids	倍萜	C10H14O	3	0.8237	-	13133	15014.3	31804.6	39190.6	46400.1	34898.4	1.14962	0.055822	0.189699	0.497571	-1.00703	down	C09913	-
MW0015865	Arachidonoyl-1-thioglycerol	花生四烯酰基-1-硫代甘油	FA	脂肪酰类	Others	其它	C23H38O3S	3	0.8096	-	17045.8	23796.9	16491.7	51546.6	61705.7	89736.3	1.39782	0.0461067	0.172389	0.282451	-1.82393	down	-	-
MW0103099	(2S,3R,4S,5S,6R)-2-[(2R,3R,4S,5S,6R)-2-[[(3S,5R,8R,9R,10R,12R,13R,14R,17S)-17-[(2S)-5,6-dihydroxy-6-methyl-2-[(2S,3R,4S,5S,6R)-3,4,5-trihydroxy-6-(hydroxymethyl)oxan-2-yl]oxyheptan-2-yl]-12-hydroxy-4,4,8,10,14-pentamethyl-2,3,5,6,7,9,11,12,13,15,16,17-dodecahydro-1H-cyclopenta[a]phenanthren-3-yl]oxy]-4,5-dihydroxy-6-(hydroxymethyl)oxan-3-yl]oxy-6-(hydroxymethyl)oxane-3,4,5-triol	(2S,3R,4S,5S,6R)-2-[(2R,3R,4S,5S,6R)-2-[[(3S,5R,8R,9R,10R,12R,13R,14R,17S)-17-[(2S)-5,6-dihydroxy-6-methyl-2-[(2S,3R,4S,5S,6R)-3,4,5-trihydroxy-6-(hydroxymethyl)oxan-2-yl]oxyheptan-2-yl]-12-hydroxy-4,4,8,10,14-pentamethyl-2,3,5,6,7,9,11,12,13,15,16,17-dodecahydro-1H-cyclopenta[a]phenanthren-3-yl]oxy]-4,5-dihydroxy-6-(hydroxymethyl)oxan-3-yl]oxy-6-(hydroxymethyl)oxane-3,4,5-triol	Terpenoids	萜类	Terpene	萜类	C48H84O20	3	0.8095	-	492160	504694	556220	209032	176205	150761	1.43758	0.00022302	0.0275633	2.89753	1.53482	up	-	-
MEDP1166	1-Palmitoyl-2-acetyl-sn-glycero-3-phosphocholine	PC(16:0/2:0)	GP	甘油磷脂类	PC	磷脂酰胆碱	C26H52NO8P	3	0.787	-	50970.6	48434	39122.2	13815.9	19910.4	32609.7	1.21665	0.0284	0.139004	2.08826	1.0623	up	-	-
MW0133232	2',4',6'-Trihydroxy-3',5'-diprenyldihydrochalcone	3-苯基-1-[2，4，6-三羟基-3，5-双（3-甲基丁-2-烯-1-基）苯基]-1-丙酮	Others	其它类	Ketone compounds	酮类化合物	C25H30O4	3	0.7808	-	29421.9	20243	101469	17283.2	17202.4	13710.2	1.01588	0.313184	0.479913	3.13583	1.64885	up	-	-
MW0140756	[3-Hexadecanoyloxy-2-(9-oxononanoyloxy)propyl] 2-(trimethylazaniumyl)ethyl phosphate	[3-Hexadecanoyloxy-2-(9-oxononanoyloxy)propyl] 2-(trimethylazaniumyl)ethyl phosphate	GL	甘油脂类	DG	甘油二酯	C33H64NO9P	3	0.7728	-	1.75331e+06	1.0944e+06	1.17823e+06	690551	565956	719903	1.32001	0.0742347	0.220377	2.037	1.02644	up	-	-
MW0012198	11(E)-(3,4-dimethyl-5-(pent-1-en-1-yl)furan-2-yl)-undecanoic acid	12,15-Epoxy-13,14-dimethyleicosa-12,14,16-trienoic acid	Lipids	脂质	Free fatty acids	游离脂肪酸	C22H36O3	3	0.7629	-	59673.1	72338.1	63330.8	26676.7	25962	28654.2	1.44267	0.007499	0.0851808	2.40294	1.2648	up	-	-
MW0141505	17-(4-Hydroxyphenyl)heptadecanoic acid	17-(4-羟基苯基）十七烷酸酯	Lipids	脂质	Free fatty acids	游离脂肪酸	C23H38O3	3	0.7587	-	87556.6	78552.3	57674.1	13913.1	11891	28265.3	1.35155	0.00970171	0.0935655	4.1388	2.04921	up	C21446	-
MEDP1438	Carnitine C6:1	肉碱 C6:1	FA	脂肪酰类	CAR	酰基肉碱	C13H23NO4	3	0.7515	-	18386.4	30744.7	8281.11	84341.5	73170.5	71676.9	1.32369	0.00340348	0.0665633	0.250502	-1.99711	down	-	-
MW0146210	Asp-Met-Leu-Asp-Leu	Asp-Met-Leu-Asp-Leu	Amino acids and derivatives	氨基酸及其衍生物	Amino acids and derivatives	氨基酸及其衍生物	C25H43N5O10S	3	0.7474	-	5641.07	4760.06	3715.32	1026.66	3329.95	2333.95	1.10399	0.0481638	0.176246	2.10991	1.07718	up	-	-
Zmhn001793	6-O-Caffeoyl-D-glucose	6-O-咖啡酰-D-葡萄糖	Phenolic acids	酚酸类	Phenolic acids	酚酸类	C15H18O9	3	0.7449	-	1612.3	1371.42	1562.89	7036.22	2920.74	3039.31	1.25676	0.172364	0.346521	0.34984	-1.51523	down	-	-
MW0128244	(5-{6,8-bis[2-(3,4-dihydroxyphenyl)-3,7-dihydroxy-3,4-dihydro-2H-1-benzopyran-4-yl]-3,5,7-trihydroxy-3,4-dihydro-2H-1-benzopyran-2-yl}-2-hydroxyphenyl)oxidanesulfonic acid	（5-{6，8-双[2-(3，4-二羟基苯基)-3，7-二羟基-3，4-二氢-2H-1-苯并吡喃-4-基]-3，5，7-三羟基-3，4-二氢-2H-1-苯并吡喃-2-基}-2-羟基苯基）氧代磺酸	Organic acids	有机酸	Organic acids	有机酸	C45H38O19S	3	0.7438	-	45037.8	51327.2	23070.8	68512.2	67217.4	104486	1.17506	0.0609183	0.197665	0.497202	-1.0081	down	-	-
MW0012942	1-Oleoyl-2-palmitoyl-sn-glycero-3-phosphocholine	1-油酰基-2-棕榈酰基-sn-甘油-3-磷酸胆碱	GP	甘油磷脂类	PC	磷脂酰胆碱	C42H82NO8P	3	0.7437	-	3.83903e+06	2.89473e+06	2.03277e+06	972299	1.73177e+06	1.01811e+06	1.24614	0.0657608	0.207149	2.35521	1.23586	up	-	-
MEDN1251	LPI(16:0/0:0)	LPI(16:0/0:0)	GP	甘油磷脂类	PI	磷脂酰肌醇	C25H49O12P	3	0.7429	-	8380.46	10018.2	9333.28	6036.49	3056.66	3976.64	1.28834	0.0155334	0.107785	2.12183	1.08531	up	-	-
MW0165144	(2R,3R,4R,5S,6R)-3,4,5-trihydroxy-6-[5,5,5-trideuterio-2-(3,3,3-trideuteriopropyl)pentanoyl]oxyoxane-2-carboxylic acid	(2R,3R,4R,5S,6R)-3,4,5-trihydroxy-6-[5,5,5-trideuterio-2-(3,3,3-trideuteriopropyl)pentanoyl]oxyoxane-2-carboxylic acid	Organic acids	有机酸	Organic acids	有机酸	C14H24O8	3	0.7427	-	6731.11	11240	10661.6	33807.8	29078.3	23481.2	1.38219	0.0115155	0.0967	0.331523	-1.59282	down	-	-
MW0146933	Bz-Arg-OEt	N-苯甲酰基-L-精氨酸乙酯盐酸盐	Benzene and substituted derivatives	苯及其衍生物	Benzene and substituted derivatives	苯及其衍生物	C15H22N4O3	3	0.7382	-	6130.14	3855.28	5568.65	16345.8	17239.7	9708.19	1.32052	0.0507966	0.180708	0.359269	-1.47686	down	C01670	-
MW0131460	2,3-(S)-hexahydroxydiphenoyl-D-glucose	2,3-(S)-六羟基二苯酰基-D-葡萄糖	Phenolic acids	酚酸类	Phenolic acids	酚酸类	C20H18O14	3	0.7377	-	5636.32	8454.93	3139.67	440.85	359.62	4242.97	1.0558	0.114252	0.273969	3.4165	1.77252	up	-	-
MW0166079	Acylsucrose S4:17[2](2,5,5,5)	酰基蔗糖 S4:17[2](2,5,5,5)	Others	其它类	Lactones	内酯类化合物	C29H48O15	3	0.7375	-	708.19	1254.7	936.21	413.88	348.82	665.84	1.18352	0.0700877	0.213524	2.02941	1.02106	up	-	-
MEDP1352	Palythene	Palythene	Amino acids and derivatives	氨基酸及其衍生物	Amino acids and derivatives	氨基酸及其衍生物	C13H20N2O5	3	0.7363	-	8107.95	6217.33	13681.1	3679.11	3355.28	1699.41	1.28107	0.0941068	0.247919	3.20667	1.68108	up	-	-
MEDL00326	DL-Arginine	DL-精氨酸	Amino acids and derivatives	氨基酸及其衍生物	Amino acids and derivatives	氨基酸及其衍生物	C6H14N4O2	3	0.728	-	26692.2	23457	25407.8	47949.4	55707.3	66134.8	1.41488	0.0240532	0.129067	0.444999	-1.16813	down	C02385	-
MW0113085	[4,5-Diacetyloxy-6-[4-(cyanomethyl)phenoxy]-2-methyloxan-3-yl] acetate	[4,5-二乙酰氧基-6-[4-(氰基甲基)苯氧基]-2-甲基氧杂-3-基]乙酸酯	Benzene and substituted derivatives	苯及其衍生物	Benzene and substituted derivatives	苯及其衍生物	C20H23NO8	3	0.7279	-	2816.55	3526.62	2743.95	5582.85	7997.02	4841.14	1.31497	0.0739057	0.219963	0.493302	-1.01946	down	-	-
MW0061198	PG(18:3(6Z,9Z,12Z)/22:6(4Z,7Z,10Z,13Z,16Z,19Z))	PG(18:3(6Z,9Z,12Z)/22:6(4Z,7Z,10Z,13Z,16Z,19Z))	GP	甘油磷脂类	PG	磷脂酰甘油	C46H73O10P	3	0.7274	-	9986.33	8938.77	14357.1	6612.48	2876.35	6041.17	1.17454	0.0494531	0.17857	2.14309	1.09969	up	-	-
MW0113074	4-Hydroxy-5-(3',4'-dihydroxyphenyl)-valeric acid-O-methyl-O-glucuronide	4-Hydroxy-5-(3',4'-dihydroxyphenyl)-valeric acid-O-methyl-O-glucuronide	Organic acids	有机酸	Organic acids	有机酸	C18H26O12	3	0.726	-	22495.5	10695.3	18117.6	5031.28	6413.65	4724.97	1.35589	0.0735278	0.219542	3.17309	1.66589	up	-	-
MW0012810	1-hexadecanoyl-2-(9Z,12Z-octadecadienoyl)-sn-glycero-3-phospho-D-myo-inositol	1-hexadecanoyl-2-(9Z,12Z-octadecadienoyl)-sn-glycero-3-phospho-D-myo-inositol	GP	甘油磷脂类	PI	磷脂酰肌醇	C43H79O13P	3	0.7257	-	29213.9	37727.8	36548.8	73930.3	54286.1	91803.1	1.32951	0.0623343	0.199332	0.47037	-1.08813	down	-	-
MW0107227	Hexaglutamyl folate	六谷氨酰叶酸	Organic acids	有机酸	Organic acids	有机酸	C44H54N12O21	3	0.725	-	8947.16	5780.7	4953.83	697.93	398.13	2731.4	1.23836	0.0289737	0.140103	5.14223	2.36239	up	-	-
MW0150013	Glu-Gly-Leu-Arg-Gln	谷氨酸-甘氨酸-亮氨酸-精氨酸-谷酰胺	Amino acids and derivatives	氨基酸及其衍生物	Amino acids and derivatives	氨基酸及其衍生物	C24H43N9O9	3	0.7246	-	2708.68	3219.2	1428.52	528.11	205.02	834.89	1.24415	0.0560564	0.189913	4.69152	2.23006	up	-	-
MW0168194	Dolichyl D-mannosyl phosphate	Dolichyl D-甘露糖磷酸酯	Organic acids	有机酸	Organic acids	有机酸	C31H55O9P	3	0.7245	-	4101.01	2300.65	2768.36	6566.56	10792.9	7510.86	1.32533	0.0395171	0.160139	0.368714	-1.43943	down	C03862	ko00510,ko01100
MW0104426	2-[(4S,5S,5aS,9aS)-4-methoxy-6,6,9a-trimethyl-5-[(2E,4E,6E)-octa-2,4,6-trienoyl]oxy-1-oxo-4,5,5a,7,8,9-hexahydro-3H-benzo[e]isoindol-2-yl]pentanedioic acid	2-[(4S,5S,5aS,9aS)-4-methoxy-6,6,9a-trimethyl-5-[(2E,4E,6E)-octa-2,4,6-trienoyl]oxy-1- oxo-4,5,5a,7,8,9-hexahydro-3H-benzo[e]isoindol-2-yl]pentanedioic acid	Organic acids	有机酸	Organic acids	有机酸	C29H39NO8	3	0.7239	-	423.59	224.22	2529.09	4848.71	4104.35	10037.4	1.18072	0.0907761	0.242627	0.167289	-2.57958	down	-	-
MW0111825	1-Isobutanol	1-异丁醇	Alcohol and amines	醇、胺类	Alcohols	醇类	C21H27NO10	3	0.7234	-	738.5	2208.21	1857.61	162.72	551.21	335.41	1.23783	0.09788	0.253413	4.57842	2.19485	up	-	-
MW0108932	N-Undecanoylglycine	N-十一烷酰甘氨酸	Amino acids and derivatives	氨基酸及其衍生物	Amino acids and derivatives	氨基酸及其衍生物	C13H25NO3	3	0.723	-	525.29	829.41	1042.55	8392.85	3857.67	6180.61	1.40151	0.0533835	0.185265	0.130065	-2.94269	down	-	-
MW0112601	3,4,5-Trihydroxy-6-[3-(6-hydroxy-7-methoxy-1,3-benzodioxol-5-yl)propanoyloxy]oxane-2-carboxylic acid	3，4，5-三羟基-6-{[3-(6-羟基-7-甲氧基-2H-1，3-苯并间二氧杂环戊烯-5-基）丙酰基]氧}氧杂环己烷-2-羧酸	Organic acids	有机酸	Organic acids	有机酸	C17H20O12	3	0.7222	-	11309.3	11767.6	9080.53	3871.22	4397.47	1995.01	1.33834	0.002883	0.0654491	3.13312	1.6476	up	-	-
MW0009706	N-[3-[(2-oxo-1-naphthalenylidene)methylamino]phenyl]-2-phenylpropanamide	萨勒米德	Benzene and substituted derivatives	苯及其衍生物	Benzene and substituted derivatives	苯及其衍生物	C26H22N2O2	3	0.7213	-	11834.2	3979.15	10819.8	18207.3	21073.7	23766	1.1523	0.019803	0.11753	0.422433	-1.2432	down	C71361	-
MW0139873	N-(7,8-Dimethoxy-2-oxochromen-3-YL)-4A,5,8-trihydroxy-N-methyl-4,5,8,8A-tetrahydro-1,2-benzoxazine-3-carboxamide	N-(7,8-Dimethoxy-2-oxochromen-3-YL)-4A,5,8-trihydroxy-N-methyl-4,5,8,8A-tetrahydro-1,2-benzoxazine-3-carboxamide	Alcohol and amines	醇、胺类	Amines	胺类	C21H22N2O9	3	0.7211	-	21337.2	18480.6	26046.5	5994.07	10543.7	8070.51	1.37931	0.010247	0.0945254	2.67651	1.42035	up	-	-
MW0145607	Arg-Lys-Glu-Val-Tyr acetate salt	Arg-Lys-Glu-Val-Tyr 醋酸盐	Amino acids and derivatives	氨基酸及其衍生物	Amino acids and derivatives	氨基酸及其衍生物	C33H55N9O11	3	0.7211	-	4043.23	5963.12	763.1	11054.6	11762	46140.5	1.15617	0.2345	0.408469	0.156176	-2.67875	down	-	-
MEDN0375	13-HOTE	13S-羟基-9Z,11E,15Z-十八碳三烯酸	Lipids	脂质	Free fatty acids	游离脂肪酸	C18H30O3	3	0.72	-	10690	11411.1	14676.8	30071.2	30205.3	40096.9	1.40541	0.0147758	0.105733	0.366411	-1.44847	down	-	-
MW0193352	Tricin-4'-O-rutinoside-7-O-rutinoside	苜蓿素-4'-O-芸香糖苷-7-O-芸香糖苷	Flavonoids	黄酮	Flavones	黄酮	C41H54O25	3	0.7195	-	18848.8	14183.8	3359.67	23384.7	26307.2	26102.2	1.00253	0.0978731	0.253413	0.480147	-1.05845	down	-	-
MW0111912	2-(Hydroxymethyl)-6-(2,4,6-trihydroxyphenyl)oxane-3,4,5-triol	2-(羟甲基)-6-(2，4，6-三羟基苯基）恶烷-3，4，5-三醇	Alcohol and amines	醇、胺类	Alcohols	醇类	C12H16O8	3	0.7187	-	4957.5	4956.96	3676.15	5773.12	19683.5	19956.1	1.14572	0.150663	0.322751	0.299269	-1.74049	down	-	-
MW0012979	1-Palmitoylglycerophosphocholine	1-棕榈酰甘油磷酸胆碱	GP	甘油磷脂类	PC	磷脂酰胆碱	C24H51NO7P+	3	0.7187	-	2.31656e+06	2.20565e+06	2.53343e+06	1.02369e+06	1.10493e+06	1.19256e+06	1.44926	0.00148144	0.0494223	2.12444	1.08708	up	C04102	-
MEDL01885	5-Acetamidovalerate	5-乙酰氨基戊酸	Organic acids	有机酸	Organic acids	有机酸	C7H13NO3	3	0.7172	-	94609.3	69142.6	91466.8	29022.6	20651.6	22923.5	1.42884	0.0112024	0.0965916	3.51552	1.81374	up	C03087	ko00310,ko01100
MW0133191	3-O-alpha-L-Arabinopyranosylproanthocyanidin A5'	3-O-α-L-阿拉伯吡喃糖基原花青素 A5'	Flavonoids	黄酮	Anthocyanidins	花青素	C35H32O16	3	0.7171	-	5576.85	6582.16	6511.85	18431.3	17151.1	14101.6	1.4346	0.0112606	0.0965916	0.375792	-1.41199	down	-	-
MW0131257	3-(3-hydroxyphenyl)-2-(4-hydroxyphenyl)-4-[(E)-2-(4-hydroxyphenyl)ethenyl]-2,3-dihydro-1-benzofuran-5,6-diol	3-(3-羟基苯基)-2-(4-羟基苯基)-4-[（E)-2-(4-羟苯基）乙烯基]-2，3-二氢-1-苯并呋喃-5，6-二醇	Benzene and substituted derivatives	苯及其衍生物	Benzene and substituted derivatives	苯及其衍生物	C28H22O6	3	0.7161	-	2877.06	5199.27	4681.02	1335.64	1234.64	652.18	1.34806	0.0364783	0.154716	3.95889	1.98509	up	-	-
MW0150482	Gly-Ser-Tyr	甘氨酸-丝氨酸-酪氨酸	Amino acids and derivatives	氨基酸及其衍生物	Amino acids and derivatives	氨基酸及其衍生物	C14H19N3O6	3	0.713	-	1004.01	3573.56	2867.45	5237.51	4458.87	5588.71	1.07014	0.0591941	0.194519	0.487077	-1.03778	down	-	-
MW0134990	6-(4-{4-[2-(3,4-dihydroxyphenyl)-3,5,7-trihydroxy-3,4-dihydro-2H-1-benzopyran-8-yl]-3,5,7-trihydroxy-6-[3,4,5-trihydroxy-6-(hydroxymethyl)oxan-2-yl]-3,4-dihydro-2H-1-benzopyran-2-yl}-2-hydroxyphenoxy)-3,4,5-trihydroxyoxane-2-carboxylic acid	6-(4-{4-[2-(3，4-二羟基苯基)-3，5，7-三羟基-3，4-二氢-2H-1-苯并吡喃-8-基]-3，5，7-三羟基-6-[3，4，5-三羟基-6-(羟甲基）恶烷-2-基]-3，4-二氢-2H-1-苯并吡喃-2-基}-2-羟基苯氧基)-3，4，5-三羟基恶烷-2-羧酸	Organic acids	有机酸	Organic acids	有机酸	C42H44O23	3	0.7127	-	303654	285476	204516	69831.7	124250	170795	1.19452	0.0276639	0.137533	2.17511	1.12109	up	-	-
MW0143508	5,11,17,23-Tetrasulfo-25,26,27,28-tetramethoxycalix[4]arene	5,11,17,23-Tetrasulfo-25,26,27,28-tetramethoxycalix[4]arene	Organic acids	有机酸	Organic acids	有机酸	C32H32O16S4	3	0.7126	-	1185.42	3550.63	8778.74	28608.1	15817.2	8948.45	1.10101	0.134833	0.300493	0.253211	-1.98159	down	-	-
MW0058411	PE(18:4(6Z,9Z,12Z,15Z)/P-18:1(11Z))	PE(18:4(6Z,9Z,12Z,15Z)/P-18:1(11Z))	GP	甘油磷脂类	PE	磷脂酰乙醇胺	C41H72NO7P	3	0.7123	-	59103.7	107741	88183.1	18035.1	4532.75	47346.4	1.10556	0.0317886	0.146584	3.64772	1.86699	up	-	-
MW0145715	Asn-Cys-Ser	L-天冬酰胺-L-半胱氨酰-L-丝氨酸	Amino acids and derivatives	氨基酸及其衍生物	Amino acids and derivatives	氨基酸及其衍生物	C10H18N4O6S1	3	0.7078	-	16118	16293.3	11942.3	4564.33	6554.61	8505.16	1.30489	0.0118201	0.0974159	2.26016	1.17643	up	-	-
MW0167897	Strictosamide ketolactam	去甲酰胺酮内酰胺	Heterocyclic compounds	杂环化合物	Heterocyclic compounds	杂环化合物	C26H30N2O10	3	0.707	-	32815.9	22462.1	17161.5	9233.28	8150.04	12268.9	1.29114	0.0812645	0.22922	2.44297	1.28864	up	-	-
MW0012528	CID 131752883	CID 131752883	Organic acids	有机酸	Organic acids	有机酸	C25H34O12	3	0.7058	-	1642.43	5128.67	1723.93	13191.8	11556.7	12565	1.34375	0.00674207	0.0829793	0.227667	-2.13501	down	-	-
MEDP1418	Carnitine C11:1	肉碱 C11:1	FA	脂肪酰类	CAR	酰基肉碱	C18H33NO4	3	0.701	-	20530.2	20937.6	11337.2	11661.2	9917.82	3463.92	1.00339	0.0853192	0.234926	2.10858	1.07627	up	-	-
MW0161401	2,5-dimethyl-4-hydroxy-3(2H)-furanone beta-D-glucopyranoside	2,5-二甲基-4-羟基-3(2H)-呋喃酮β-D-吡喃葡萄糖苷	Others	其它类	Ketone compounds	酮类化合物	C12H18O8	3	0.7006	-	2694.2	3119.15	3950.32	194.31	642.27	344.39	1.39756	0.00952651	0.0931872	8.2675	3.04745	up	-	-
MW0140723	(Z)-2-oct-7-enylpent-2-enedioic acid	(Z)-2-oct-7-enylpent-2-enedioic acid	Others	其它类	Others	其它	C13H20O4	3	0.7001	-	4929.23	5750.91	5641.15	9897.88	12432.7	13809.1	1.40625	0.0241872	0.12925	0.451616	-1.14683	down	-	-
MW0154401	Neu5Ac2-3LacDiNAcSp	Neu5Ac2-3LacDiNAcSp	Others	其它类	Saccharides	糖类	C29H48N6O19	3	0.6993	-	118975	47667.1	17358.5	117678	116136	162548	1.00678	0.128112	0.292251	0.464222	-1.10711	down	-	-
MW0144521	Ala-Asp-Thr-Arg	Ala-Asp-Thr-Arg	Amino acids and derivatives	氨基酸及其衍生物	Amino acids and derivatives	氨基酸及其衍生物	C17H31N7O8	3	0.6991	-	38201.6	46619.6	33788.4	92480.6	85535.6	126378	1.40032	0.0306333	0.143974	0.389657	-1.35972	down	-	-
MW0150917	His-Glu-Glu-Arg-Gln	组氨酸-谷氨酸-谷氨酸-精氨酸-谷酰胺	Amino acids and derivatives	氨基酸及其衍生物	Amino acids and derivatives	氨基酸及其衍生物	C27H43N11O11	3	0.6986	-	8855.68	9268.29	8361.19	20022.4	18365.2	19266.8	1.45921	0.00025883	0.029247	0.459378	-1.12225	down	-	-
MW0138978	Mono-trans-p-coumaroylmesotartaric acid	单反式对香豆酰基内异酒石酸	Organic acids	有机酸	Organic acids	有机酸	C14H14O8	3	0.6986	-	26167.2	9687.13	17772.3	4233.07	8449.54	7073	1.1916	0.133306	0.298348	2.7145	1.44069	up	-	-
MW0159113	Val-Met-Tyr	缬氨酸-甲硫氨酸-酪氨酸	Amino acids and derivatives	氨基酸及其衍生物	Amino acids and derivatives	氨基酸及其衍生物	C19H29N3O5S1	3	0.6977	-	14994.3	9564.26	10168.1	1744.96	1573.63	680.2	1.40187	0.023643	0.127934	8.6843	3.11841	up	-	-
MW0116853	1-acetyl-10a,12a-dimethyl-4,4a,4b,5,6,10b,11,12-octahydro-1H-naphtho[2,1-f]isochromene-3,8-dione	1-acetyl-10a,12a-dimethyl-4,4a,4b,5,6,10b,11,12-octahydro-1H-naphtho[2,1-f]isochromene-3,8-dione	Others	其它类	Ketone compounds	酮类化合物	C21H26O4	3	0.6973	-	1662.01	2907.47	1557.09	595.38	795.86	473.9	1.33676	0.075839	0.221903	3.28478	1.7158	up	-	-
ZINC38231252	Myrsinionoside C	（2R，3R，4S，5S，6R)-2-[（1S，4S，5R)-4-[（3S)-3-羟基丁基]-3，3，5-三甲基环己基]氧基-6-(羟甲基）恶烷-3，4，5-三醇	Alcohol and amines	醇、胺类	Alcohols	醇类	C19H36O7	3	0.697	-	6772.85	8316.02	4643.49	13659.1	15667.4	19700.5	1.35453	0.0148203	0.105733	0.40248	-1.31301	down	-	-
MW0063221	1-beta-D-Galactosylsphingosine	1-β-D-半乳糖基鞘氨醇	Lipids	脂质	Sphingolipids	鞘脂	C24H47NO7	3	0.6969	-	55547.6	63511.8	77187.1	15555	12004.8	29362.2	1.34226	0.00534471	0.0752923	3.44764	1.78561	up	-	-
MW0147976	Cys-Ala-Pro-Pro-Thr	半胱氨酸-丙氨酸-脯氨酸-脯氨酸-苏氨酸	Amino acids and derivatives	氨基酸及其衍生物	Amino acids and derivatives	氨基酸及其衍生物	C20H33N5O7S	3	0.6964	-	37049.1	54698	42762.3	139225	140357	165440	1.43534	0.0012604	0.0492757	0.302254	-1.72617	down	-	-
ZINC70455327	7-O-galloyl-sedoheptulose	[（2R，3R，4R，5S)-2，3，4，5，7-五羟基-6-氧代庚基]3，4，5-三羟基苯甲酸酯	Organic acids	有机酸	Organic acids	有机酸	C14H18O11	3	0.6962	-	7402.59	8025.05	11909.2	2905.54	3362.53	2191.17	1.39791	0.040273	0.162006	3.2316	1.69225	up	-	-
MW0150193	Glu-Tyr-Ile-Glu	谷氨酸-酪氨酸-异亮氨酸-谷氨酸	Amino acids and derivatives	氨基酸及其衍生物	Amino acids and derivatives	氨基酸及其衍生物	C25H36N4O10	3	0.696	-	25610.6	20272.2	29861.8	70293.5	62339.1	75310.6	1.41195	0.00106366	0.0448673	0.364256	-1.45697	down	-	-
MW0001231	1-(Pentanoylamino)-N-((2'-(1H-tetrazol-5-yl)biphenyl-4-yl)methyl)cyclopentanecarboxamide	1-(戊酰氨基)-N-((2'-(1H-四唑-5-基)联苯-4-基)甲基)环戊烷甲酰胺	Benzene and substituted derivatives	苯及其衍生物	Benzene and substituted derivatives	苯及其衍生物	C25H30N6O2	3	0.6958	-	3980.05	5054.89	3973.95	757.42	1119.28	2952.22	1.18729	0.0373935	0.156344	2.69395	1.42973	up	-	-
MW0160409	(10Z)-1,3,8-trihydroxy-6-methyl-10-(2,4,5-trihydroxy-7-methyl-10-oxo-9-anthrylidene)anthracen-9-one	(10Z)-1,3,8-trihydroxy-6-methyl-10-(2,4,5-trihydroxy-7-methyl-10-oxo-9-anthrylidene)anthracen-9-one	Benzene and substituted derivatives	苯及其衍生物	Benzene and substituted derivatives	苯及其衍生物	C30H20O8	3	0.6951	-	299.4	631.52	929.64	8056.26	7184.18	2642.08	1.33781	0.0845048	0.233812	0.104044	-3.26474	down	-	-
MW0168358	NCGC00381206-01_C40H60O10_1-Naphthalenebutanoic acid, decahydro-beta,6-dihydroxy-alpha-(2-hydroxyethylidene)-5-(hydroxymethyl)-5,8a-dimethyl-2-methylene-, (4E)-4-[2-[(1R,4aS,5R,6R,8aS)-decahydro-6-hydroxy-5-(hydroxymethyl)-5,8a-dimethyl-2-methylene-1-naphthalenyl]ethylidene]tetrahydro-5-oxo-3-furanyl ester, (alphaE,1R,4aS,5R,6R,8aS)-	NCGC00381206-01_C40H60O10_1-萘丁酸，十氢-β，6-二羟基-α-(2-羟基亚乙基)-5-(羟甲基)-5,8a-二甲基-2-亚甲基-，(4E)-4-[2-[ (1R,4aS,5R,6R,8aS)-十氢-6-羟基-5-(羟甲基)-5,8a-二甲基-2-亚甲基-1-萘基]亚乙基]四氢-5-氧代-3-呋喃酯, (alphaE,1R,4aS,5R,6R,8aS)-	Others	其它类	Lactones	内酯类化合物	C40H60O10	3	0.6945	-	37039.3	24442.6	19804.8	15296.6	3969.63	7511.57	1.18187	0.0503501	0.180266	3.0356	1.60198	up	-	-
MW0112701	2-(3,4-Dimethoxyphenoxy)-6-[(3,4,5-trihydroxyoxan-2-yl)oxymethyl]oxane-3,4,5-triol	2-(3,4-二甲氧基苯氧基)-6-[(3,4,5-trihydroxyoxan-2-yl)oxymethyl]oxane-3,4,5-triol	Benzene and substituted derivatives	苯及其衍生物	Benzene and substituted derivatives	苯及其衍生物	C19H28O12	3	0.6934	-	12607.5	10167.1	16783.7	3305.62	3374.64	3234.73	1.43889	0.0361113	0.154288	3.98975	1.9963	up	-	-
MW0146412	Atractyloside G	苍术苷G	Terpenoids	萜类	Sesquiterpenoids	倍半萜	C21H36O8	3	0.6924	-	1546.29	3876.05	3285.99	8242.32	10694.2	21323.1	1.29382	0.115995	0.276433	0.216304	-2.20887	down	C17864	-
MW0153510	Met-Asn-Ser-Phe-Val	Met-Asn-Ser-Phe-Val	Amino acids and derivatives	氨基酸及其衍生物	Amino acids and derivatives	氨基酸及其衍生物	C26H40N6O8S	3	0.6923	-	32187.4	51703.1	41192.8	11350.2	17430.3	18043.7	1.35153	0.0311788	0.145396	2.67134	1.41756	up	-	-
MW0147080	Carapin-8(9)-ene	Carapin-8(9)-烯	Others	其它类	Hydrocarbon derivatives	烃衍生物	C27H30O7	3	0.6922	-	79012.9	78041	61279.1	35031.6	14416.1	19462.6	1.3219	0.00424044	0.0709222	3.16837	1.66374	up	-	-
MEDL01052	Glycerophosphoric acid	甘油磷酸	GP	甘油磷脂类	PA	磷脂酸	C3H9O6P	3	0.6912	-	61611.4	57713.7	49818.2	106581	110869	128980	1.4273	0.0048057	0.0730961	0.488247	-1.03432	down	C03189	-
MW0127719	({6-[5,7-dihydroxy-2-(4-hydroxyphenyl)-4-oxo-3,4-dihydro-2H-1-benzopyran-8-yl]-3,4,5-trihydroxyoxan-2-yl}methoxy)sulfonic acid	（{6-[5，7-二羟基-2-(4-羟基苯基)-4-氧代-3，4-二氢-2H-1-苯并吡喃-8-基]-3，4，5-三羟基恶烷-2-基}甲氧基）磺酸	Organic acids	有机酸	Organic acids	有机酸	C21H22O13S	3	0.6911	-	30518.2	23150.5	29779.6	766.77	8650.41	2459.36	1.26995	0.00206119	0.0556041	7.02631	2.81277	up	-	-
MW0150961	His-His-Ser-Lys-His	组氨酸-组氨酸-丝氨酸-赖氨酸-组氨酸	Amino acids and derivatives	氨基酸及其衍生物	Amino acids and derivatives	氨基酸及其衍生物	C27H40N12O7	3	0.6902	-	9171.61	14132.8	7365.5	48741.2	28238.4	41886.8	1.38722	0.0293875	0.14072	0.25802	-1.95444	down	-	-
MW0012778	1-Docosanoyl-sn-glycero-3-phosphocholine	1-Behenoyl-2-hydroxy-sn-glycero-3-phosphocholine	GP	甘油磷脂类	PC	磷脂酰胆碱	C30H62NO7P	3	0.69	-	66895	44385.9	26389.2	11759.8	29603.6	23358.9	1.01732	0.1621	0.335181	2.12709	1.08888	up	C04230	ko00564
MW0149609	Gln-Ala-Gln-Ile-Glu	Gln-Ala-Gln-Ile-Glu	Amino acids and derivatives	氨基酸及其衍生物	Amino acids and derivatives	氨基酸及其衍生物	C24H41N7O10	3	0.6897	-	9596.45	7324.76	11698.4	1883.71	1265.86	2129.17	1.42409	0.0217485	0.121749	5.42167	2.43874	up	-	-
MW0156640	Ser-Arg-Glu-Val-Ser	Ser-Arg-Glu-Val-Ser	Amino acids and derivatives	氨基酸及其衍生物	Amino acids and derivatives	氨基酸及其衍生物	C22H40N8O10	3	0.6895	-	23590.9	29501.2	9306.68	53773.1	44925.2	57193.3	1.21909	0.0172801	0.112454	0.40027	-1.32095	down	-	-
MEDP1425	Carnitine C7-OH	肉碱 C7-OH	FA	脂肪酰类	CAR	酰基肉碱	C14H27NO5	3	0.6887	-	269086	300555	279885	636371	620823	547106	1.4477	0.00388268	0.0685005	0.470834	-1.08671	down	-	-
MW0000617	(2E)-4-[(3-carbamoylphenyl)amino]-4-oxobut-2-enoic acid	(2E)-4-[(3-氨基甲酰基苯基)氨基]-4-氧代丁-2-烯酸	Benzene and substituted derivatives	苯及其衍生物	Benzene and substituted derivatives	苯及其衍生物	C11H10N2O4	3	0.6881	-	18741	23564.8	15264.9	6035.17	5893.44	15340.6	1.12487	0.0665971	0.209074	2.1112	1.07806	up	-	-
MW0152468	Leu-Pro-Glu-Phe-Tyr	Leu-Pro-Glu-Phe-Tyr	Amino acids and derivatives	氨基酸及其衍生物	Amino acids and derivatives	氨基酸及其衍生物	C34H45N5O9	3	0.6861	-	31651.3	34006.2	33576.7	10645.5	9944.8	23659.3	1.23628	0.051091	0.18124	2.2426	1.16517	up	-	-
MW0156876	Ser-Phe-Leu	L-丝氨酰-L-苯丙氨酰-L-亮氨酸	Amino acids and derivatives	氨基酸及其衍生物	Amino acids and derivatives	氨基酸及其衍生物	C18H27N3O5	3	0.686	-	48989.1	61601.3	65449.8	18315.6	15712.4	7461.38	1.365	0.00290571	0.0654491	4.24301	2.08509	up	-	-
MW0167003	(3R, 7S)-12-oxojasmonoyl-isoleucine	(3R, 7S)-12-oxojasmonoyl-isoleucine	Organic acids	有机酸	Organic acids	有机酸	C18H26NO5-	3	0.6859	-	9412.08	5310.64	10055.8	914.45	1207.51	992.8	1.43832	0.0394227	0.160036	7.9552	2.9919	up	-	-
MW0105471	Ala-Leu-Asp-Asp	Ala-Leu-Asp-Asp	Amino acids and derivatives	氨基酸及其衍生物	Amino acids and derivatives	氨基酸及其衍生物	C17H28N4O9	3	0.6841	-	168864	146493	291488	81077.4	67898.6	36641.6	1.30133	0.0793239	0.226154	3.26933	1.70899	up	-	-
MW0153118	Lys-Pro-Met	L-赖氨酸-L-脯氨酸-L-蛋氨酸	Amino acids and derivatives	氨基酸及其衍生物	Amino acids and derivatives	氨基酸及其衍生物	C16H30N4O4S1	3	0.6834	-	262492	308330	258839	111144	156018	145040	1.38634	0.00288978	0.0654491	2.01275	1.00917	up	-	-
MW0155119	Phe-Asp-Ala-Glu	Phe-Asp-Ala-Glu	Amino acids and derivatives	氨基酸及其衍生物	Amino acids and derivatives	氨基酸及其衍生物	C21H28N4O9	3	0.683	-	43148.7	31553.8	41240.9	6676.43	13845.4	11069.5	1.38746	0.00527234	0.0752923	3.67011	1.87582	up	-	-
MW0145653	Asn-Ala-Asp	L-天冬酰胺-L-丙氨酰-L-天冬氨酸	Amino acids and derivatives	氨基酸及其衍生物	Amino acids and derivatives	氨基酸及其衍生物	C11H18N4O7	3	0.6828	-	4219.4	2432.67	2781.17	13806.6	13015.3	14308.7	1.42563	0.000199296	0.0273488	0.229349	-2.12439	down	-	-
MW0157841	Thr-Tyr-His-Asp	Thr-Tyr-His-Asp	Amino acids and derivatives	氨基酸及其衍生物	Amino acids and derivatives	氨基酸及其衍生物	C23H30N6O9	3	0.6793	-	6180.16	6593.45	2639.21	13446.1	10277.8	10605	1.21953	0.0188331	0.116237	0.448975	-1.15529	down	-	-
MW0106322	Cysteinyl-histidine	半胱氨酰组氨酸	Amino acids and derivatives	氨基酸及其衍生物	Amino acids and derivatives	氨基酸及其衍生物	C9H14N4O3S	3	0.6777	-	20144.8	20124.2	18157.2	44577.6	40188.1	41166	1.45617	0.000714209	0.039212	0.463951	-1.10796	down	-	-
MW0144792	Ala-Val-Asp-Asp	Ala-Val-Asp-Asp	Amino acids and derivatives	氨基酸及其衍生物	Amino acids and derivatives	氨基酸及其衍生物	C16H26N4O9	3	0.6773	-	49468.5	80308.2	55996.2	19902.4	41373.5	22641.3	1.22586	0.0478639	0.175584	2.21376	1.1465	up	-	-
MEDL01884	2-Acetolactate	2-羟基-2-甲基-3-氧代丁酸	Others	其它类	Lactones	内酯类化合物	C5H8O4	3	0.6772	-	2905.38	1470.04	3505.89	1063.83	1198.66	1187.29	1.22239	0.133586	0.298574	2.28458	1.19193	up	C00900	-
MW0146246	Asp-Pro-Thr-Ile-Glu	Asp-Pro-Thr-Ile-Glu	Amino acids and derivatives	氨基酸及其衍生物	Amino acids and derivatives	氨基酸及其衍生物	C24H39N5O11	3	0.677	-	2096.76	3314.3	844.74	6742.74	7151.99	10868.7	1.28865	0.0243736	0.12925	0.252622	-1.98495	down	-	-
MW0143173	4,4'-(2,3-Dimethyl-1,4-butanediyl)bis(2-methoxyphenol)	4,4'-(2,3-Dimethyl-1,4-butanediyl)bis(2-methoxyphenol)	Benzene and substituted derivatives	苯及其衍生物	Benzene and substituted derivatives	苯及其衍生物	C20H26O4	3	0.6769	-	8669.06	8711.53	10367.8	36176.9	29264.3	39171.6	1.4424	0.0107161	0.0948362	0.265248	-1.91458	down	-	-
MW0156732	Ser-Glu-His	丝氨酸-谷氨酸-组氨酸	Amino acids and derivatives	氨基酸及其衍生物	Amino acids and derivatives	氨基酸及其衍生物	C14H21N5O7	3	0.6765	-	175675	189883	192434	315895	582078	279197	1.2108	0.162677	0.335775	0.474012	-1.07701	down	-	-
MEDP1335	LysoPC(20:5(5Z,8Z,11Z,14Z,17Z))	LPC(20:5/0:0)	Lipids	脂质	LPC	溶血磷脂酰胆碱	C28H48NO7P	3	0.6761	-	401170	432183	427166	219600	209495	111308	1.31088	0.0147373	0.105733	2.33255	1.22191	up	C04230	ko00564
MW0158677	Tyr-Val-Tyr-Lys-Val	Tyr-Val-Tyr-Lys-Val	Amino acids and derivatives	氨基酸及其衍生物	Amino acids and derivatives	氨基酸及其衍生物	C34H50N6O8	3	0.6758	-	5028.32	6125.06	3228.2	27918.1	21562.3	21996.5	1.42827	0.00518942	0.0752923	0.201206	-2.31325	down	-	-
MW0156784	Ser-His-Tyr	L-丝氨酰-L-组氨酰-L-酪氨酸	Amino acids and derivatives	氨基酸及其衍生物	Amino acids and derivatives	氨基酸及其衍生物	C18H23N5O6	3	0.6753	-	212641	160356	183706	50751.2	119436	69812.2	1.27348	0.0169345	0.111733	2.3196	1.21387	up	-	-
MW0006449	Butyl 4-aminobenzoate	4-氨基苯甲酸丁酯	Benzene and substituted derivatives	苯及其衍生物	Benzene and substituted derivatives	苯及其衍生物	C11H15NO2	3	0.6747	-	17953.7	30868.8	5325.69	748.07	1525.6	7219.22	1.09054	0.174024	0.348799	5.70408	2.512	up	C07875	-
MEDL01951	Symplocosidin	3'-甲氧基-(-)-表儿茶素	Flavonoids	黄酮	Flavones	黄酮	C16H16O6	3	0.6744	-	10817.7	12978.1	11051.8	3365.24	2325.42	6245.19	1.29557	0.00914874	0.091316	2.91957	1.54576	up	-	-
MW0145128	Aniquinazoline B	苯喹唑啉 B	Benzene and substituted derivatives	苯及其衍生物	Benzene and substituted derivatives	苯及其衍生物	C27H31N5O4	3	0.6744	-	9509.34	5496.64	19842.9	26370.1	36776.2	18397.5	1.06313	0.087813	0.239115	0.427364	-1.22646	down	-	-
MW0165740	4-Methylthiobutyl-desulfoglucosinolate	4-甲基硫代丁基-脱硫代硫代葡萄糖苷	Others	其它类	Glucosinolates	硫苷类	C12H23NO6S2	3	0.6739	-	14931.7	15668.6	15772.3	8340.38	3462.08	7382.2	1.25629	0.023202	0.126805	2.41717	1.27332	up	-	-
MEDN1261	LPS(18:3/0:0)	LPS(18:3/0:0)	GP	甘油磷脂类	LPS	溶血磷脂酰丝氨酸	C24H42NO9P	3	0.6737	-	4274.7	3798.27	1676.86	614.65	1546.62	1892.57	1.02188	0.12536	0.288669	2.40509	1.26609	up	-	-
MW0158916	Val-Asn-His-Val-Thr	Val-Asn-His-Val-Thr	Amino acids and derivatives	氨基酸及其衍生物	Amino acids and derivatives	氨基酸及其衍生物	C24H40N8O8	3	0.6726	-	6409.39	10564.2	6410.92	5874.22	2121.23	3390.1	1.08081	0.0900464	0.241987	2.05388	1.03835	up	-	-
MEDP0825	N-Cyclohexylformamide	N-环己基甲酰胺	Alkaloids	生物碱	Alkaloids	生物碱	C7H13NO	3	0.6718	-	59194.2	57971	51367.3	23442.8	9612.36	24801.6	1.27673	0.00690797	0.0830155	2.91293	1.54247	up	C11519	-
MW0145967	Asn-Arg-Cys-Ser-Gln-Gly-Ser-Cys-Trp-Asn(Disulfide Bridge 3-8)	Asn-Arg-Cys-Ser-Gln-Gly-Ser-Cys-Trp-Asn(Disulfide Bridge 3-8)	Amino acids and derivatives	氨基酸及其衍生物	Amino acids and derivatives	氨基酸及其衍生物	C44H65N17O16S2	3	0.6714	-	2906.74	9652.53	7276.43	41267.3	33142.9	29379.9	1.34812	0.00518844	0.0752923	0.191114	-2.3875	down	-	-
MW0141800	1-O-(1Z-Tetradecenyl)-2-(9Z-octadecenoyl)-sn-glycerol	1-O-(1Z-十四碳烯基)-2-(9Z-十八碳烯基)-sn-甘油	GL	甘油脂类	DG	甘油二酯	C35H66O4	3	0.6698	-	480085	390181	406682	1.26243e+06	475925	1.5063e+06	1.10606	0.168383	0.342558	0.393554	-1.34537	down	-	-
MW0129562	Mono-O-demethyltetrahydrocurcumin	1-(3，4-二羟基苯基)-7-(4-羟基-3-甲氧基苯基）庚烷-3，5-二酮	Others	其它类	Ketone compounds	酮类化合物	C20H22O6	3	0.6697	-	63474	57358.9	73514.1	32675.2	29271.3	24622.5	1.41795	0.0069328	0.0830155	2.24499	1.16671	up	-	-
MW0105855	Asp-Glu-Lys	L-天冬氨酰-L-谷氨酰-L-赖氨酸	Amino acids and derivatives	氨基酸及其衍生物	Amino acids and derivatives	氨基酸及其衍生物	C15H26N4O8	3	0.6684	-	47764.8	54664.6	48191.6	24384.6	23010.8	26356.8	1.43744	0.00273874	0.0643947	2.04226	1.03016	up	-	-
MEDP1407	Carnitine C14:2	肉碱 C14:2	FA	脂肪酰类	CAR	酰基肉碱	C21H37NO4	3	0.6675	-	38039.1	36620.7	34945.1	16033.1	14878	9742.76	1.39533	0.00223995	0.0585124	2.69605	1.43085	up	-	-
MW0157601	Thr-Cys-Tyr-Thr-Tyr	Thr-Cys-Tyr-Thr-Tyr	Amino acids and derivatives	氨基酸及其衍生物	Amino acids and derivatives	氨基酸及其衍生物	C29H39N5O10S	3	0.6675	-	305163	90565.4	148412	66577	35468.8	33528.9	1.23873	0.164343	0.338201	4.01358	2.00489	up	-	-
MW0156972	Ser-Val-Gln	丝氨酰-缬氨酰-谷氨酰胺	Amino acids and derivatives	氨基酸及其衍生物	Amino acids and derivatives	氨基酸及其衍生物	C13H24N4O6	3	0.6662	-	7095.63	4714.61	8008.36	24291.5	22043.4	10836.5	1.24999	0.0887939	0.239963	0.346652	-1.52844	down	-	-
MW0146110	Asp-Glu-Val-Phe-Asp	Asp-Glu-Val-Phe-Asp	Amino acids and derivatives	氨基酸及其衍生物	Amino acids and derivatives	氨基酸及其衍生物	C27H37N5O12	3	0.6657	-	1.52397e+06	1.08405e+06	1.08055e+06	354537	388940	670803	1.32499	0.0170903	0.111808	2.60809	1.38299	up	-	-
MW0151467	Ile-Ile-Asp	L-异亮氨酸-L-异亮氨酸-L-天冬氨酸	Amino acids and derivatives	氨基酸及其衍生物	Amino acids and derivatives	氨基酸及其衍生物	C16H29N3O6	3	0.6652	-	182943	162632	221830	77114.2	81299.3	50483.7	1.38955	0.00816745	0.0886554	2.71619	1.44158	up	-	-
ZINC95919260	(2R)-2-hydroxy-N-[(2S,3S,4R)-1,3,4-trihydroxyoctadecan-2-yl]pentadecanamide	（2R)-2-羟基-N-[（2S，3S，4R)-1，3，4-三羟基十八烷-2-基]十五酰胺	Alcohol and amines	醇、胺类	Amines	胺类	C33H67NO5	3	0.6651	-	12303.7	19602.5	33265.3	7896.97	6063.52	2794.91	1.25028	0.112239	0.271539	3.88959	1.95962	up	-	-
MW0150814	His-Ala-Glu-Asp-Gly	组氨酸-丙氨酸-谷氨酸-天门冬氨酸-甘氨酸	Amino acids and derivatives	氨基酸及其衍生物	Amino acids and derivatives	氨基酸及其衍生物	C20H29N7O10	3	0.6648	-	9164.94	8452.46	4836.82	35317.4	31069.2	34682.1	1.42298	0.000154731	0.0273488	0.222168	-2.17028	down	-	-
MW0139564	trans-Resveratrol 4'-O-glucuronide	白藜芦醇4-O-D-葡萄糖醛酸苷	Others	其它类	Stilbene	茋类	C20H20O9	3	0.6648	-	89764.7	80192.6	55417.8	25786.7	41472.1	32206.9	1.30733	0.0381996	0.157653	2.26586	1.18006	up	-	-
MW0111527	alpha-(beta-D-Glucopyranosyloxy)-4-hydroxybenzeneacetonitrile	α-(β-D-吡喃葡萄糖基氧基)-4-羟基苯乙腈	Heterocyclic compounds	杂环化合物	Heterocyclic compounds	杂环化合物	C14H17NO7	3	0.6646	-	6246.89	3095.17	5821.55	1014.94	1158.92	90.12	1.18213	0.0376835	0.156573	6.69777	2.74368	up	-	-
ZINC95909975	D-Friedoolean-14-ene-3beta-ol 3-[(E)-3-(3,4-dihydroxyphenyl)acrylate]	[（3S，4aR，6aR，6aS，8aR，12aR14aR14bR)-4，4，6a，6a，8A，11，11，14b-八甲基-1，2，3，4A，5，6，8，9，10，12，12A，13，14，14a-十四氢吡啶-3-基]（E)-3-(3，4-二羟基苯基）丙-2-烯酸酯	Others	其它类	Lactones	内酯类化合物	C39H56O4	3	0.6636	-	11852.5	12488.5	9871.54	5593.44	5121.57	4693.85	1.41968	0.00961997	0.0931872	2.22032	1.15077	up	-	-
MW0150188	Glu-Tyr-Gln	谷氨酸-酪氨酸-谷酰胺	Amino acids and derivatives	氨基酸及其衍生物	Amino acids and derivatives	氨基酸及其衍生物	C19H26N4O8	3	0.6634	-	3343.9	6520.84	7318.12	13979.6	13475.1	10138.1	1.22721	0.0164412	0.110561	0.457078	-1.12949	down	-	-
ZINC95914900	3-[(1S,4R,7S,10S,13S,16S)-24-methoxy-10-[(4-methoxyphenyl)methyl]-4,9,13,15,29-pentamethyl-2,5,8,11,14,30-hexaoxo-22-oxa-3,6,9,12,15,29-hexazatetracyclo[14.12.2.218,21.123,27]tritriaconta-18,20,23,25,27(31),32-hexaen-7-yl]propanoic acid	3-[（1S，4R，7S，10S，13S，16S)-24-甲氧基-10-[（4-甲氧基苯基）甲基]-4，9，13，15，29-五甲基-2，5，8，11，14，30-六氧代-22-氧杂-3，6，9，12，15，29-六氮杂四环[14.1 2.2.218，21.123，27]三十三烷-18，20，23，25，27（31）32-六烯-7	Organic acids	有机酸	Organic acids	有机酸	C43H52N6O11	3	0.6627	-	487142	401642	456362	192863	242806	217852	1.42816	0.00323667	0.0665633	2.05831	1.04146	up	-	-
MW0146187	Asp-Lys-Ile	L-天冬氨酰-L-赖氨酰-L-异亮氨酸	Amino acids and derivatives	氨基酸及其衍生物	Amino acids and derivatives	氨基酸及其衍生物	C16H30N4O6	3	0.6625	-	305713	264853	297472	115560	168765	110631	1.38773	0.00350556	0.0665633	2.19781	1.13607	up	-	-
MW0158493	Tyr-His-Val	酪氨酸-组氨酸-缬氨酸	Amino acids and derivatives	氨基酸及其衍生物	Amino acids and derivatives	氨基酸及其衍生物	C20H27N5O5	3	0.6616	-	154802	143101	167822	41458.5	70578.2	62893.5	1.39486	0.00118509	0.0474034	2.66235	1.4127	up	-	-
MW0157867	Thr-Val-Met	苏氨酸-缬氨酸-甲硫氨酸	Amino acids and derivatives	氨基酸及其衍生物	Amino acids and derivatives	氨基酸及其衍生物	C14H27N3O5S1	3	0.6614	-	112920	94299.4	171978	61836	44389.1	41417.9	1.3361	0.072043	0.216538	2.56834	1.36084	up	-	-
MW0005861	Benzanthrone	苯甲酮	Alkaloids	生物碱	Alkaloids	生物碱	C17H10O	3	0.6608	-	87255.3	26846.4	70767	154955	133516	166378	1.16452	0.0209056	0.1202	0.40644	-1.29889	down	-	-
MW0132951	3-[5,7-dihydroxy-2-(4-hydroxy-3-methoxyphenyl)-4-oxo-3,4-dihydro-2H-1-benzopyran-8-yl]-5,7-dihydroxy-2-phenyl-3,4-dihydro-2H-1-benzopyran-4-one	3-[5，7-二羟基-2-(4-羟基-3-甲氧基苯基)-4-氧代-3，4-二氢-2H-1-苯并吡喃-8-基]-5，7-二羟基-2-苯基-3，4-二氢-2H-1-苯并吡喃-4-酮	Benzene and substituted derivatives	苯及其衍生物	Benzene and substituted derivatives	苯及其衍生物	C31H24O10	3	0.6603	-	3276.93	13131.3	20971	82476.9	68233.5	87206.5	1.28329	0.0010015	0.0427798	0.15711	-2.67015	down	-	-
MW0161270	1-heptadecanoyl-2-(5Z,8Z,11Z,14Z-eicosatetraenoyl)-sn-glycero-3-phospho-(1'-myo-inositol-4',5'-bisphosphate)	1-heptadecanoyl-2-(5Z,8Z,11Z,14Z-eicosatetraenoyl)-sn-glycero-3-phospho-(1'-myo-inositol-4',5'-bisphosphate)	GL	甘油脂类	DG	甘油二酯	C46H83O19P3	3	0.6591	-	24249	16160	27662.5	12101.9	8933.95	5260.96	1.26613	0.0346622	0.151443	2.58858	1.37216	up	-	-
MW0117015	8-Quinolyl 1-pentylindazole-3-carboxylate	8-Quinolyl 1-pentylindazole-3-carboxylate	Organic acids	有机酸	Organic acids	有机酸	C22H21N3O2	3	0.6582	-	4781.89	11431.1	5944	17136.8	15099.3	25295.3	1.26367	0.0417498	0.165008	0.385128	-1.37659	down	-	-
MW0146226	Asp-Phe-Ser-Ala-Thr	Asp-Phe-Ser-Ala-Thr	Amino acids and derivatives	氨基酸及其衍生物	Amino acids and derivatives	氨基酸及其衍生物	C23H33N5O10	3	0.6579	-	33365.9	35894.6	31911.7	97742.9	120268	102735	1.4515	0.00725901	0.0842626	0.315428	-1.66462	down	-	-
Hmln000873	2-O-Galloyl-D-glucose	2-O-没食子酰-D-葡萄糖	Phenolic acids	酚酸类	Phenolic acids	酚酸类	C13H16O10	3	0.6567	-	1838.65	3075.2	2479.3	9758.06	8553.39	9601.75	1.42921	0.000196985	0.0273488	0.264862	-1.91669	down	-	-
MW0121138	5-benzyl-5-(pyridin-3-yl)imidazolidine-2,4-dione	5-苄基-5-（吡啶-3-基）咪唑啉-2,4-二酮	Benzene and substituted derivatives	苯及其衍生物	Benzene and substituted derivatives	苯及其衍生物	C15H13N3O2	3	0.6565	-	3.88032e+06	3.06343e+06	4.05797e+06	772820	795264	897758	1.45394	0.010468	0.0948362	4.46165	2.15758	up	-	-
MW0149414	GalNAca1-3[Fuca1-2]Galb1-4[Fuca1-3]GlcNAcb-Sp	GalNAca1-3[Fuca1-2]Galb1-4[Fuca1-3]GlcNAcb-Sp	Others	其它类	Saccharides	糖类	C36H61N5O24	3	0.6564	-	11831.7	9048.02	7755.99	33470.4	29724.6	34293.2	1.43506	0.000278498	0.029247	0.293735	-1.76741	down	-	-
MW0125970	(9Z)-N-[2-(5-hydroxy-1H-indol-3-yl)ethyl]octadec-9-enamide	油酰基5-羟色胺	Tryptamines,Cholines,Pigments	色胺、胆碱、色素	Tryptamines	色胺	C28H44N2O2	3	0.6564	-	81854.3	62008.8	55458.1	35147.9	30132.5	31460.1	1.3732	0.0455935	0.171509	2.06037	1.0429	up	-	-
MEDN1212	7alpha,12beta-Dihydroxy-5alpha-cholan-24-oic Acid	7α,12β-二羟基-5α-胆碱-24-酸	Tryptamines,Cholines,Pigments	色胺、胆碱、色素	Cholines	胆碱类	C24H40O4	3	0.6563	-	186728	456205	484308	180799	62755.1	112569	1.16452	0.100237	0.256308	3.16531	1.66235	up	-	-
MW0158565	Tyr-Phe-Gln	酪氨酸-苯丙氨酸-谷氨酰胺	Amino acids and derivatives	氨基酸及其衍生物	Amino acids and derivatives	氨基酸及其衍生物	C23H28N4O6	3	0.6549	-	52241.6	49112.7	46092.2	16602	19264.9	14433.9	1.44188	0.00019292	0.0273488	2.93129	1.55154	up	-	-
ZINC33831652	Hydroxy gamma-sanshool	（2E，4E，8Z，10E，12E)-N-(2-羟基丙-2-基）十四-2，4，8，10，12-五烯酰胺	FA	脂肪酰类	Others	其它	C17H25NO2	3	0.6546	-	13681	11025.7	10873.6	16261.5	163816	65478.1	1.09275	0.247913	0.420782	0.144897	-2.7869	down	-	-
MW0015222	9-((2R,3R,4S,5R)-3,4-Dihydroxy-5-(hydroxymethyl)tetrahydrofuran-2-yl)-7-methyl-2,6-dioxo-2,3,6,9-tetrahydro-1H-purin-7-ium	7-甲基黄嘌呤核苷	Nucleotides and derivatives	核苷酸及其衍生物	Nucleotides and derivatives	核苷酸及其衍生物	C11H15N4O6+	3	0.6542	-	13200.7	18932	11157.4	62372.3	41097.5	40653.2	1.39388	0.0326082	0.147324	0.300369	-1.73519	down	C16352	ko00232,ko01100,ko01110
MW0146162	Asp-Ile-Val	L-天冬氨酰-L-异亮氨酰-L-缬氨酸	Amino acids and derivatives	氨基酸及其衍生物	Amino acids and derivatives	氨基酸及其衍生物	C15H27N3O6	3	0.6535	-	231070	233683	257780	82161.2	88471.3	75099.7	1.4567	0.00066369	0.0371027	2.94032	1.55597	up	-	-
ZINC15120682	Cowaxanthone	考克山酮	Flavonoids	黄酮	Other Flavonoids	其它类黄酮	C24H26O6	3	0.6534	-	128471	74421.7	122808	37533.8	51051.2	41715.5	1.35382	0.0562448	0.190077	2.49961	1.3217	up	-	-
MW0013781	3,4,5-trihydroxy-6-{[(3E)-2-oxo-4-phenylbut-3-en-1-yl]oxy}oxane-2-carboxylic acid	3，4，5-三羟基-6-{[（3E)-2-氧代-4-苯基丁-3-烯-1-基]氧}氧杂环己烷-2-羧酸	Organic acids	有机酸	Organic acids	有机酸	C16H18O8	3	0.6529	-	80517.8	90424.2	139010	36744.5	66358.3	21690.2	1.19167	0.0561247	0.189948	2.48373	1.31251	up	-	-
MW0011073	(2R,3R,4S,5S,6R)-2-octoxy-6-[[(2S,3R,4S,5R)-3,4,5-trihydroxyoxan-2-yl]oxymethyl]oxane-3,4,5-triol	(2R,3R,4S,5S,6R)-2-octoxy-6-[[(2S,3R,4S,5R)-3,4,5-trihydroxyoxan-2-yl]oxymethyl]oxane-3,4, 5-三醇	Alcohol and amines	醇、胺类	Alcohols	醇类	C19H36O10	3	0.6522	-	3428.17	4087.48	5372.77	129.98	1249.96	868.81	1.21949	0.0106615	0.0948362	5.73137	2.51888	up	-	-
MW0017014	CerP(d18:1/12:0)	N-(十二烷酰基）鞘氨四烯-1-磷酸	SL	鞘脂类	Cer	神经酰胺	C30H60NO6P	3	0.6505	-	13241.7	19897	12076.5	24136.7	208650	99779.8	1.15279	0.215367	0.391726	0.135958	-2.87876	down	-	-
MW0155849	Pro-Glu-Glu	脯氨酰-谷氨酰-谷氨酸	Amino acids and derivatives	氨基酸及其衍生物	Amino acids and derivatives	氨基酸及其衍生物	C15H23N3O8	3	0.6499	-	297417	389665	283262	143481	107207	146579	1.38196	0.0188375	0.116237	2.44256	1.28839	up	-	-
MW0150893	His-Gln-Ala-Arg	组氨酸-谷酰胺-丙氨酸-精氨酸	Amino acids and derivatives	氨基酸及其衍生物	Amino acids and derivatives	氨基酸及其衍生物	C20H34N10O6	3	0.6485	-	27120.2	48713.7	49383.2	85066	69407.9	100259	1.24892	0.0213889	0.121419	0.491561	-1.02456	down	-	-
MW0149952	Glu-Asp-Thr	谷氨酸-天门冬氨酸-苏氨酸	Amino acids and derivatives	氨基酸及其衍生物	Amino acids and derivatives	氨基酸及其衍生物	C13H21N3O9	3	0.6481	-	46990	40036.3	58555.2	23661.7	28997.1	8318.75	1.14379	0.0273127	0.137155	2.38746	1.25548	up	-	-
MW0123841	Eremopetasitenin B2	Eremopetasitenin B2	Terpenoids	萜类	Sesquiterpenoids	倍半萜	C24H32O7S	3	0.6477	-	99438.9	92163.8	120415	44273	56933.9	40701.2	1.40237	0.00846215	0.0903582	2.19873	1.13667	up	-	-
MW0108623	L-Asparagine, N-[2-(acetylamino)-2-deoxy-beta-D-glucopyranosyl]-	L-天冬酰胺，N-[2-(乙酰氨基)-2-脱氧-β-D-吡喃葡萄糖基]-	Amino acids and derivatives	氨基酸及其衍生物	Amino acids and derivatives	氨基酸及其衍生物	C12H21N3O8	3	0.645	-	50376.8	49468.1	46196.4	8323.83	10407.3	24004.9	1.31554	0.0150867	0.106434	3.41728	1.77285	up	-	-
MW0148070	Cys-Thr-Met	半胱氨酸-苏氨酸-蛋氨酸	Amino acids and derivatives	氨基酸及其衍生物	Amino acids and derivatives	氨基酸及其衍生物	C12H23N3O5S2	3	0.6437	-	3403.85	4962.39	4543.57	12876.3	10857.4	4738.44	1.07981	0.164008	0.33792	0.453419	-1.14108	down	-	-
MW0112359	3,4,5-trihydroxy-6-({3-oxo-3-[(3,4,5,6-tetrahydroxyoxan-2-yl)methoxy]propanoyl}oxy)oxane-2-carboxylic acid	3,4,5-三羟基-6-({3-氧代-3-[（3,4,5,6-四羟基氧烷-2-基）甲氧基]丙酰基}氧基）氧烷-2-羧酸	Organic acids	有机酸	Organic acids	有机酸	C15H22O15	3	0.643	-	10318.7	1780.16	6008.41	20118.3	20629.4	9709.62	1.03733	0.0751154	0.221358	0.358864	-1.47849	down	-	-
MW0158515	Tyr-Leu-Gln	酪氨酸-亮氨酸-谷氨酰胺	Amino acids and derivatives	氨基酸及其衍生物	Amino acids and derivatives	氨基酸及其衍生物	C20H30N4O6	3	0.6427	-	470853	440467	631528	252473	242026	127536	1.30354	0.0168292	0.111713	2.48032	1.31053	up	-	-
MW0126122	4-[(5-Methyl-1h-Pyrazol-3-Yl)amino]-2-Phenylphthalazin-1(2h)-One	4-[(5-Methyl-1h-Pyrazol-3-Yl)amino]-2-Phenylphthalazin-1(2h)-One	Others	其它类	Ketone compounds	酮类化合物	C18H15N5O	3	0.6422	-	62263.2	50943.6	70832.4	16072.9	20127.1	12840	1.42884	0.00913824	0.091316	3.75284	1.90798	up	-	-
MW0055901	PA(20:0/22:6(4Z,7Z,10Z,13Z,16Z,19Z))	PA(20:0/22:6(4Z,7Z,10Z,13Z,16Z,19Z))	GP	甘油磷脂类	PA	磷脂酸	C45H77O8P	3	0.6415	-	139919	213442	279617	64220.9	88750.3	62417.5	1.34879	0.0689848	0.211982	2.93877	1.55521	up	-	-
MEDL02614	Gancaonin D	甘草宁 D	Flavonoids	黄酮	Isoflavones	异黄酮	C21H20O7	3	0.6409	-	74615.9	81878.1	40222.8	4222.14	6730.01	25910.2	1.24263	0.0342484	0.151443	5.33653	2.4159	up	-	-
MW0146153	Asp-Ile-Met	L-天冬氨酰-L-异亮氨酰-L-蛋氨酸	Amino acids and derivatives	氨基酸及其衍生物	Amino acids and derivatives	氨基酸及其衍生物	C15H27N3O6S1	3	0.6405	-	17046.3	7840.08	4649.4	28640.6	32866.6	23590.8	1.23334	0.0188063	0.116237	0.34708	-1.52666	down	-	-
MW0155848	Pro-Glu-Gln	脯氨酰-谷氨酰-谷氨酰胺	Amino acids and derivatives	氨基酸及其衍生物	Amino acids and derivatives	氨基酸及其衍生物	C15H24N4O7	3	0.6405	-	2856.85	2743.19	4505.79	11315.8	5429.59	6115.94	1.18938	0.139938	0.308023	0.442049	-1.17772	down	-	-
MW0168189	Patchouli alcohol	广藿香醇	Alcohol and amines	醇、胺类	Alcohols	醇类	C15H26O	3	0.6404	-	3918.63	5425.35	7560.5	17044.7	12234.8	11374.7	1.29835	0.0265027	0.134691	0.415812	-1.266	down	C09705	-
MW0159110	Val-Met-Met-Val-Arg	Val-Met-Met-Val-Arg	Amino acids and derivatives	氨基酸及其衍生物	Amino acids and derivatives	氨基酸及其衍生物	C26H50N8O6S2	3	0.6388	-	22638.6	15483.2	18762.5	78449.8	52884.1	74923.3	1.41574	0.0194843	0.116836	0.275793	-1.85834	down	-	-
MW0011793	1-(1Z-octadecenyl)-2-(9Z-octadecenoyl)-sn-glycero-3-phosphocholine	1-(1Z-十八碳烯基)-2-(9Z-十八烯酰基)-sn-甘油-3-磷酸胆碱	GP	甘油磷脂类	PC	磷脂酰胆碱	C44H86NO7P	3	0.6375	-	14970	18231	14728.5	36525.3	47384.4	31652.5	1.39715	0.0338936	0.15035	0.414751	-1.26968	down	-	-
MW0158060	L-trihomomethionine	L-三高甲硫氨酸	Amino acids and derivatives	氨基酸及其衍生物	Amino acids and derivatives	氨基酸及其衍生物	C8H17NO2S	3	0.6371	-	14817.3	16588.7	16456.7	7506.47	3881.94	2720.91	1.32581	0.00847145	0.0903582	3.39227	1.76225	up	C17221	ko00966,ko01210
MW0157744	Thr-Met-Leu	苏氨酸-甲硫氨酸-亮氨酸	Amino acids and derivatives	氨基酸及其衍生物	Amino acids and derivatives	氨基酸及其衍生物	C15H29N3O5S1	3	0.6354	-	19090.4	399085	270831	889480	858729	865574	1.03849	0.0282373	0.138647	0.263605	-1.92355	down	-	-
MW0157636	Thr-Glu-Met	苏氨酰-谷氨酰-甲硫氨酸	Amino acids and derivatives	氨基酸及其衍生物	Amino acids and derivatives	氨基酸及其衍生物	C14H25N3O7S1	3	0.6343	-	3824.43	1834.43	1450.66	11620	8853.01	7220.46	1.33885	0.0165459	0.111104	0.256722	-1.96172	down	-	-
MW0135092	6-(5-carboxy-2-methoxyphenoxy)-3,4,5-trihydroxyoxane-2-carboxylic acid	6-(5-羧基-2-甲氧基苯氧基)-3,4,5-三羟基氧烷-2-羧酸	Organic acids	有机酸	Organic acids	有机酸	C14H16O10	3	0.6336	-	1.05481e+06	1.24217e+06	275719	4021.73	22648.3	431030	1.05335	0.124968	0.288484	5.62094	2.49081	up	-	-
MW0136456	6-{4-[3-(3,7-dimethylocta-2,6-dien-1-yl)-5,7-dihydroxy-6-(4-hydroxy-3-methylbut-2-en-1-yl)-4-oxo-3,4-dihydro-2H-1-benzopyran-2-yl]-3-hydroxyphenoxy}-3,4,5-trihydroxyoxane-2-carboxylic acid	6-{2-[3-(3，7-二甲基辛-2，6-二烯-1-基)-5，7-二羟基-6-(4-羟基-3-甲基丁-2-烯-1-基)-4-氧代-3，4-二氢-2H-1-苯并吡喃-2-基]-5-羟基苯氧基}-3，4，5-三羟基恶烷-2-羧酸	Organic acids	有机酸	Organic acids	有机酸	C36H44O13	3	0.6325	-	3090.58	7449.68	7518.11	2243.99	2015.72	2253.68	1.23827	0.119032	0.280704	2.7725	1.47119	up	-	-
ZINC44361679	3',5-Di(1-oxo-4-pentenyloxy)-3,4',6,7-tetramethoxyflavone	3'，5-二（1-氧代-4-戊烯氧基)-3，4'，6，7-四甲氧基黄酮	Flavonoids	黄酮	Flavones	黄酮	C29H30O10	3	0.6311	-	2227.17	1697.41	1906.66	3257.77	8996.41	7574.45	1.26268	0.112728	0.272283	0.294082	-1.76571	down	-	-
MW0168269	Podocarpa-8,11,13-trien-16-oic acid, 12-hydroxy-	罗汉松酸	Terpenoids	萜类	Ditepenoids	二萜	C17H22O3	3	0.6309	-	72699	92374.9	133439	557964	422659	257058	1.34768	0.0638838	0.202889	0.241187	-2.05177	down	-	-
MW0006109	Azelnidipine	阿塞尼地平	Benzene and substituted derivatives	苯及其衍生物	Benzene and substituted derivatives	苯及其衍生物	C33H34N4O6	3	0.6305	-	17817.7	16629.2	10062	52567.6	39167.1	38775.7	1.38226	0.0108761	0.095217	0.341037	-1.552	down	-	-
MW0112382	3,4,5-trihydroxy-6-(2-oxoethoxy)oxane-2-carboxylic acid	3,4,5-三羟基-6-(2-氧代乙氧基）氧烷-2-羧酸	Organic acids	有机酸	Organic acids	有机酸	C8H12O8	3	0.629	-	4913.91	5033.56	7632.16	2235.97	1837.04	2464.43	1.3914	0.0483068	0.17663	2.68907	1.42711	up	-	-
MW0148512	Dihydromethanophenazine	二氢甲烷吩嗪；2-(二氢五苯基氧基)-二氢吩嗪	Alcohol and amines	醇、胺类	Polyamines	多胺	C37H52N2O	3	0.6286	-	1812.07	843.97	12576.9	38907.1	23256.2	14303	1.12544	0.0860093	0.236004	0.199211	-2.32763	down	-	-
MW0062301	PS(14:0/18:3(6Z,9Z,12Z))	PS(14:0/18:3(6Z,9Z,12Z))	GP	甘油磷脂类	PS	磷脂酰丝氨酸	C38H68NO10P	3	0.6279	-	8315	19478.4	10216.6	37273.6	59220.1	43130.5	1.34977	0.0192853	0.11637	0.272231	-1.8771	down	-	-
MW0153001	Lys-Ile-Arg-Asp	Lys-Ile-Arg-Asp	Amino acids and derivatives	氨基酸及其衍生物	Amino acids and derivatives	氨基酸及其衍生物	C22H42N8O7	3	0.6252	-	12950.9	13145.1	6574.5	355.05	1461.6	3824.01	1.20173	0.0355218	0.152754	5.79196	2.53405	up	-	-
MW0155395	Phe-Tyr-Trp	苯丙氨酰-酪氨酰-色氨酸	Amino acids and derivatives	氨基酸及其衍生物	Amino acids and derivatives	氨基酸及其衍生物	C29H30N4O5	3	0.6249	-	41389.7	53274.3	34110.8	102601	75249.9	88428.4	1.36224	0.0116707	0.0967	0.483608	-1.04809	down	-	-
MW0148055	Cys-Phe-His	半胱氨酸-苯丙氨酸-组氨酸	Amino acids and derivatives	氨基酸及其衍生物	Amino acids and derivatives	氨基酸及其衍生物	C18H23N5O4S1	3	0.6236	-	20970.5	17184.3	11048.5	99375.6	24861.7	63168.7	1.19534	0.163378	0.337071	0.262549	-1.92934	down	-	-
MW0164191	curcumin 4'-O-beta-D-gentiobioside	姜黄素 4'-O-β-D-龙胆二糖苷	Others	其它类	Ketone compounds	酮类化合物	C33H40O16	3	0.6235	-	4452.42	4783.86	7479.03	47633.3	30786.4	22511.8	1.394	0.0606042	0.197059	0.16561	-2.59414	down	-	-
ZINC95919284	methyl 2-[(1S,4aS,4bS,5R,8aS,9aR,10R,10aS)-10-acetyloxy-1-(furan-3-yl)-4b,6,6,10a-tetramethyl-4-methylidene-7-oxo-1,2,4a,5,8,8a,9a,10-octahydroindeno[5,6-b][1]benzofuran-5-yl]acetate	2-[（1S，4aS，4bS，5R，8aS，9aR，10R，10aS)-10-乙酰氧基-1-(呋喃-3-基)-4b，6，6，10a-四甲基-4-亚甲基-7-氧代-1，2，4A，5，8，8A，9a，10-八氢茚并[5，6-b][1]苯并呋喃-5-基]乙酸甲酯	Benzene and substituted derivatives	苯及其衍生物	Benzene and substituted derivatives	苯及其衍生物	C29H36O7	3	0.6235	-	126408	69777.4	110485	204680	198651	216953	1.29787	0.0175513	0.113186	0.494403	-1.01624	down	-	-
MW0145901	Asn-Thr-Glu	L-天冬酰胺-L-苏氨酰-L-谷氨酸	Amino acids and derivatives	氨基酸及其衍生物	Amino acids and derivatives	氨基酸及其衍生物	C13H22N4O8	3	0.6225	-	21714.9	19803.1	25402.7	62769.2	68779	48452	1.40759	0.0188216	0.116237	0.371781	-1.42747	down	-	-
MW0154293	Nap-Ser-OH	Nap-Ser-OH	Amino acids and derivatives	氨基酸及其衍生物	Amino acids and derivatives	氨基酸及其衍生物	C21H18N2O7	3	0.6206	-	1240.93	4045.51	3871.14	7410.63	17183	4295.18	1.02395	0.228503	0.403753	0.316994	-1.65747	down	-	-
MW0158642	Tyr-Trp-Thr	酪氨酸-色氨酸-苏氨酸	Amino acids and derivatives	氨基酸及其衍生物	Amino acids and derivatives	氨基酸及其衍生物	C24H28N4O6	3	0.6181	-	59270.3	60944.5	49994.6	204491	182553	145181	1.43622	0.0170007	0.111733	0.319807	-1.64473	down	-	-
MW0157850	Thr-Tyr-Trp	苏氨酸-酪氨酸-色氨酸	Amino acids and derivatives	氨基酸及其衍生物	Amino acids and derivatives	氨基酸及其衍生物	C24H28N4O6	3	0.6175	-	5466.47	5484.93	10657.2	1402.73	850.26	3646.87	1.21925	0.0747868	0.221171	3.66256	1.87285	up	-	-
MEDP1409	Carnitine C12-OH	肉碱 C12-OH	FA	脂肪酰类	CAR	酰基肉碱	C19H37NO5	3	0.6173	-	38036.8	36539.5	37580.2	101659	91710.9	83246.8	1.44983	0.00892603	0.091316	0.405458	-1.30238	down	-	-
MW0156861	Ser-Met-Met	丝氨酰-甲硫氨酰-甲硫氨酸	Amino acids and derivatives	氨基酸及其衍生物	Amino acids and derivatives	氨基酸及其衍生物	C13H25N3O5S2	3	0.6165	-	4035	6422.31	8274.87	19991	13064	15488.9	1.30552	0.0206283	0.119197	0.385881	-1.37377	down	-	-
ZINC103550758	Dehydroevodiamine	去氢吴茱萸碱	Alkaloids	生物碱	Plumerane	吲哚类生物碱	C19H15N3O	3	0.6164	-	16031.1	20284.3	14346.1	30517.5	262471	108454	1.17665	0.228282	0.403515	0.126198	-2.98623	down	-	-
MW0153803	Methyl acetoxy-6-gingerol	Methyl acetoxy-6-gingerol	Others	其它类	Lactones	内酯类化合物	C20H30O5	3	0.6162	-	8807.5	15257	4952.01	40206.1	50946.5	40903.7	1.36538	0.00184719	0.0519452	0.219728	-2.18621	down	-	-
MW0156635	Ser-Ala-Val-Glu	Ser-Ala-Val-Glu	Amino acids and derivatives	氨基酸及其衍生物	Amino acids and derivatives	氨基酸及其衍生物	C16H28N4O8	3	0.6148	-	4669.47	11695.1	16809	45834.8	28569.2	50041.6	1.25602	0.0255596	0.13251	0.266571	-1.90741	down	-	-
MW0061675	Dipalmitoyl phosphatidylinositol	PI(16:0/16:1(9Z))	GP	甘油磷脂类	PI	磷脂酰肌醇	C41H79O13P	3	0.6143	-	33223.3	34592.2	48589.3	114086	71546.6	60549.8	1.238	0.107573	0.265196	0.472841	-1.08057	down	-	-
MW0154137	N1,N5,N10-triferuloyl spermidine	N1,N5,N10-三阿魏酰亚精胺	Heterocyclic compounds	杂环化合物	Heterocyclic compounds	杂环化合物	C37H43N3O9	3	0.6138	-	26229.3	26160.3	28763.4	63911.9	61303.2	58813.6	1.45272	0.000171232	0.0273488	0.44098	-1.18121	down	C18071	ko00940,ko01110
MW0152919	Lys-Cys-Asp	L-赖氨酸-L-半胱氨酸-L-天冬氨酸	Amino acids and derivatives	氨基酸及其衍生物	Amino acids and derivatives	氨基酸及其衍生物	C13H24N4O6S1	3	0.6132	-	1.06547e+06	530353	404402	315389	251617	354597	1.08779	0.216045	0.39204	2.17037	1.11794	up	-	-
MW0149679	Gln-Glu-His	谷酰氨-谷氨酸-组氨酸	Amino acids and derivatives	氨基酸及其衍生物	Amino acids and derivatives	氨基酸及其衍生物	C16H24N6O7	3	0.6127	-	1227.13	3077.98	2065.3	6114.02	7941.95	3675.43	1.21841	0.0750734	0.221358	0.359273	-1.47685	down	-	-
MW0145474	Arg-Phe-Val-Asp	Arg-Phe-Val-Asp	Amino acids and derivatives	氨基酸及其衍生物	Amino acids and derivatives	氨基酸及其衍生物	C24H37N7O7	3	0.6124	-	5095.65	8460.18	6238.37	2098.01	1126.88	1977.92	1.36366	0.0299304	0.141711	3.80452	1.92771	up	-	-
MW0158161	Trp-His-His	色氨酸-组氨酸-组氨酸	Amino acids and derivatives	氨基酸及其衍生物	Amino acids and derivatives	氨基酸及其衍生物	C23H26N8O4	3	0.6087	-	7468.99	6519.49	9342.83	20025.8	18029.4	19663.6	1.41333	0.000575841	0.0356647	0.404224	-1.30677	down	-	-
MEDP1326	LysoPC(20:1(11Z))	LPC(20:1/0:0)	Lipids	脂质	LPC	溶血磷脂酰胆碱	C28H56NO7P	3	0.608	-	1082.53	475.56	1900.98	9167	1587.75	10213.2	1.09862	0.162076	0.335181	0.16497	-2.59973	down	C04230	ko00564
MW0149384	Gal1-3Gal1-4GlcSp	Gal1-3Gal1-4GlcSp	Others	其它类	Saccharides	糖类	C20H35N3O16	3	0.6078	-	5199.42	3380.66	3941.65	17193.5	10989.8	15711	1.403	0.0234317	0.127334	0.28527	-1.8096	down	-	-
MW0012771	2-Arachidonoyl glycerol-d5	1-花生四烯酸甘油酯-d5	GL	甘油脂类	MG	单甘油酯	C23H38O4	3	0.6077	-	148720	97315.2	123412	34809.7	73564.8	68725.1	1.21357	0.0305411	0.143974	2.0861	1.06081	up	-	-
MW0139530	Quercetin 3-xylosyl-(1->6)-glucoside	槲皮素 3-木糖基-(1->6)-葡萄糖苷	Flavonoids	黄酮	Flavones	黄酮	C26H28O16	3	0.6057	-	18325.7	13195.1	22547.2	26471.9	38889	49970	1.20939	0.0795434	0.226291	0.468807	-1.09293	down	-	-
MW0007626	(2-(Phenylamino)-1,4-phenylene)bis((4-(pyrrolidin-1-yl)piperidin-1-yl)methanone)	(2-(苯氨基)-1,4-亚苯基)双((4-(吡咯烷-1-基)哌啶-1-基)甲酮)	Benzene and substituted derivatives	苯及其衍生物	Benzene and substituted derivatives	苯及其衍生物	C32H43N5O2	3	0.6033	-	60610.6	56880.2	46773.2	17998.2	25911.8	8259.93	1.27784	0.00535533	0.0752923	3.14863	1.65473	up	-	-
MW0063140	PS(DiMe(11,3)/MonoMe(11,5))	PS(DiMe(11,3)/MonoMe(11,5))	GP	甘油磷脂类	PS	磷脂酰丝氨酸	C47H80NO12P	3	0.602	-	78739	66460.4	46362.9	78364	158312	173865	1.1379	0.121774	0.284508	0.466609	-1.09971	down	-	-
ZINC85511895	(1S,4aS,10aR)-6-[(4bS,8S,8aR)-8-carboxy-2-hydroxy-4b,8-dimethyl-1-propan-2-yl-5,6,7,8a,9,10-hexahydrophenanthren-3-yl]-7-hydroxy-1,4a-dimethyl-8-propan-2-yl-2,3,4,9,10,10a-hexahydrophenanthrene-1-carboxylic acid	(1S,4aS,10aR)-6-[(4bS,8S,8aR)-8-carboxy-2-hydroxy-4b,8-dimethyl-1-propan-2-yl-5,6,7,8a,9,10-hexahydrophenanthren-3-yl]-7-hydroxy-1,4a-dimethyl-8-propan-2-yl-2,3,4,9,10,10a-hexahydrophenanthrene-1-carboxylic acid	Organic acids	有机酸	Organic acids	有机酸	C40H54O6	3	0.6018	-	35625.6	33075.8	30903.8	15597.1	14424.6	17022.3	1.43795	0.00127437	0.0492757	2.11728	1.08221	up	-	-
MW0144647	Ala-Leu-Tyr	L-丙氨酰-L-亮氨酰-L-酪氨酸	Amino acids and derivatives	氨基酸及其衍生物	Amino acids and derivatives	氨基酸及其衍生物	C18H27N3O5	3	0.599	-	36444.4	27741.5	26921	7696.93	9817.16	5708.76	1.41402	0.00974995	0.0935655	3.92316	1.97202	up	-	-
MW0156875	Ser-Phe-Ile-Asp	Ser-Phe-Ile-Asp	Amino acids and derivatives	氨基酸及其衍生物	Amino acids and derivatives	氨基酸及其衍生物	C22H32N4O8	3	0.599	-	207541	181690	210047	78597.4	92358	107363	1.42016	0.000993253	0.0427798	2.1532	1.10648	up	-	-
MW0145975	Asn-Gly-Asn	Asn-Gly-Asn	Amino acids and derivatives	氨基酸及其衍生物	Amino acids and derivatives	氨基酸及其衍生物	C10H17N5O6	3	0.5987	-	298.72	594.94	1701.84	4930.56	6401.3	7121.32	1.31049	0.00395164	0.0686236	0.140653	-2.82979	down	-	-
MW0153526	Met-Cys-Leu	L-蛋氨酸-L-半胱氨酸-L-亮氨酸	Amino acids and derivatives	氨基酸及其衍生物	Amino acids and derivatives	氨基酸及其衍生物	C14H27N3O4S2	3	0.5974	-	39298.2	31216.2	55835	6904.3	5968.03	4772.04	1.43896	0.0368926	0.155337	7.16089	2.84014	up	-	-
MW0156017	Pro-Trp-Met	脯氨酰-色氨酸-蛋氨酸	Amino acids and derivatives	氨基酸及其衍生物	Amino acids and derivatives	氨基酸及其衍生物	C21H28N4O4S1	3	0.5963	-	22046.8	20895.2	20916.9	44447.2	49540.2	49628.2	1.45359	0.00289442	0.0654491	0.444651	-1.16925	down	-	-
MW0158660	Tyr-Val-Arg-Pro-Leu	酪氨酸-缬氨酸-精氨酸-脯氨酸-亮氨酸	Amino acids and derivatives	氨基酸及其衍生物	Amino acids and derivatives	氨基酸及其衍生物	C31H50N8O7	3	0.5962	-	10564.9	11348.7	11127	3765.62	2938.22	9661.61	1.10243	0.117864	0.279314	2.01893	1.01359	up	-	-
MW0158571	Tyr-Phe-Ile	酪氨酸-苯丙氨酸-异亮氨酸	Amino acids and derivatives	氨基酸及其衍生物	Amino acids and derivatives	氨基酸及其衍生物	C24H31N3O5	3	0.5961	-	28627.3	20582.9	39144.3	13474.5	7316.12	1754.29	1.16172	0.034038	0.150703	3.91905	1.9705	up	-	-
MW0158560	Tyr-Met-Tyr	酪氨酸-甲硫氨酸-酪氨酸	Amino acids and derivatives	氨基酸及其衍生物	Amino acids and derivatives	氨基酸及其衍生物	C23H29N3O6S1	3	0.5958	-	85814.9	75323.8	104891	58106.1	37477.8	32175.3	1.2953	0.0173519	0.112763	2.08228	1.05816	up	-	-
MW0159186	Val-Thr-Pro-Gly-Gly	Val-Thr-Pro-Gly-Gly	Amino acids and derivatives	氨基酸及其衍生物	Amino acids and derivatives	氨基酸及其衍生物	C18H31N5O7	3	0.5947	-	23487	30744.3	51385.4	8016.68	16101.4	20639	1.1425	0.120999	0.283268	2.35978	1.23865	up	-	-
MW0000410	Psychotrin	精神素	Alkaloids	生物碱	Alkaloids	生物碱	C28H36N2O4	3	0.5927	-	807.38	1179.35	573.83	1456.6	2368.42	1923.1	1.26489	0.0349693	0.151825	0.44546	-1.16663	down	-	-
MW0151604	Ile-Thr-Thr	L-异亮氨酸-L-苏氨酸-L-苏氨酸	Amino acids and derivatives	氨基酸及其衍生物	Amino acids and derivatives	氨基酸及其衍生物	C14H27N3O6	3	0.5926	-	14207.2	18092.9	11088	36031.2	48527.8	73721.9	1.36695	0.0700799	0.213524	0.274121	-1.86712	down	-	-
MW0129762	1-[3-[6-[2,4-dihydroxy-3-[(E)-3-methylbut-1-enyl]benzoyl]-5-(2,4-dihydroxyphenyl)-3-methylcyclohex-2-en-1-yl]-2,4-dihydroxyphenyl]-3-(2,4-dihydroxyphenyl)propan-1-one	1-[3-(6-{2，4-二羟基-3-[（1E)-3-甲基丁-1-烯-1-基]苯甲酰基}-5-(2，4-二羟基苯基)-3-甲基环己-2-烯-1-基)-2，4-二羟基苯基]-3-(2，4二羟基苯基）丙-1-酮	Benzene and substituted derivatives	苯及其衍生物	Benzene and substituted derivatives	苯及其衍生物	C40H40O10	3	0.5925	-	23030.7	12513.2	19446.1	1922.68	5595.67	7055.81	1.25809	0.0311065	0.145352	3.77312	1.91576	up	-	-
MW0009592	P-Toluenesulfonamide	4-甲苯磺酰胺	Benzene and substituted derivatives	苯及其衍生物	Benzene and substituted derivatives	苯及其衍生物	C7H9NO2S	3	0.5914	-	14731.7	12804.4	11924.2	37983.8	30606.7	25704.6	1.40513	0.0306566	0.143974	0.418476	-1.25678	down	C14412	-
MW0164278	5'-Adenylyl sulfate(2-)	5'-腺苷酸硫酸盐(2-)	Nucleotides and derivatives	核苷酸及其衍生物	Nucleotides and derivatives	核苷酸及其衍生物	C10H12N5O10PS-2	3	0.5912	-	205.57	368.34	432.41	1005.73	758.6	864.8	1.31581	0.0053895	0.0752923	0.382758	-1.3855	down	-	-
MW0159125	Val-Phe-Met	缬氨酸-苯丙氨酸-甲硫氨酸	Amino acids and derivatives	氨基酸及其衍生物	Amino acids and derivatives	氨基酸及其衍生物	C19H29N3O4S1	3	0.5905	-	214228	332311	225359	102425	119183	121873	1.35936	0.0595655	0.195049	2.24727	1.16818	up	-	-
MEDP1460	Hydroxyeicosapentaenoic acid	羟基二十碳五烯酸	Lipids	脂质	Free fatty acids	游离脂肪酸	C20H30O3	3	0.5893	-	86285.6	118720	91576.6	356341	284468	294719	1.43817	0.00437027	0.0710316	0.317021	-1.65735	down	-	-
MW0145896	Asn-Thr-Asn	L-天冬酰胺-L-苏氨酰-L-天冬酰胺	Amino acids and derivatives	氨基酸及其衍生物	Amino acids and derivatives	氨基酸及其衍生物	C12H21N5O7	3	0.5885	-	795.72	1194.73	852.76	422.52	214.62	106	1.26453	0.0128966	0.100572	3.82594	1.93581	up	-	-
MW0155328	Phe-Ser-Gly-Thr-Trp	Phe-Ser-Gly-Thr-Trp	Amino acids and derivatives	氨基酸及其衍生物	Amino acids and derivatives	氨基酸及其衍生物	C29H36N6O8	3	0.5871	-	27708.3	27396.2	31576.3	68367.2	54946.8	72740.3	1.42095	0.0162517	0.109924	0.442126	-1.17747	down	-	-
MW0151501	Ile-Leu-Val	L-异亮氨酸-L-亮氨酸-L-缬氨酸	Amino acids and derivatives	氨基酸及其衍生物	Amino acids and derivatives	氨基酸及其衍生物	C17H33N3O4	3	0.5871	-	84155.8	55731.4	48459.9	140665	131592	112552	1.32251	0.0103503	0.094725	0.489455	-1.03075	down	-	-
MW0011749	[2-[4-Hydroxy-2,5-bis(hydroxymethyl)-3-(3-methylbutanoyloxy)oxolan-2-yl]oxy-6-(hydroxymethyl)-4,5-bis(2-methylpropanoyloxy)oxan-3-yl] decanoate	[2-[4-Hydroxy-2,5-bis(hydroxymethyl)-3-(3-methylbutanoyloxy)oxolan-2-yl]oxy-6-(hydroxymethyl)-4,5-bis(2-methylpropanoyloxy)oxan- 3-基]癸酸酯	Others	其它类	Lactones	内酯类化合物	C35H60O15	3	0.5848	-	8384.7	10624.7	9236.54	27261.3	36324.6	29186.5	1.43728	0.0124538	0.0991073	0.304465	-1.71565	down	-	-
MW0011863	1,2-Diarachidoyl-sn-glycero-3-phosphocholine	1,2-Diarachidoyl-sn-glycero-3-phosphocholine	GP	甘油磷脂类	PC	磷脂酰胆碱	C48H96NO8P	3	0.5832	-	156790	227799	254071	82668.9	94635.8	136574	1.26593	0.0443745	0.16947	2.03473	1.02484	up	-	-
MW0156800	Ser-Ile-Lys-Gly-Lys	Ser-Ile-Lys-Gly-Lys	Amino acids and derivatives	氨基酸及其衍生物	Amino acids and derivatives	氨基酸及其衍生物	C23H45N7O7	3	0.5831	-	9496.57	4078.44	6288.2	78678.5	12985.2	13632.8	1.06404	0.321125	0.487572	0.188641	-2.40629	down	-	-
MW0150513	Gly-Tyr-Asp	甘氨酸-酪氨酸-天门冬氨酸	Amino acids and derivatives	氨基酸及其衍生物	Amino acids and derivatives	氨基酸及其衍生物	C15H19N3O7	3	0.5826	-	4930.48	6053.14	7899.48	14782	17958.4	11211.5	1.31895	0.0343362	0.151443	0.429631	-1.21883	down	-	-
MW0153502	Met-Asn-Ala	L-蛋氨酸-L-天冬酰胺-L-丙氨酸	Amino acids and derivatives	氨基酸及其衍生物	Amino acids and derivatives	氨基酸及其衍生物	C12H22N4O5S1	3	0.5825	-	85874.3	85579.1	95822	195049	198032	142127	1.38168	0.035189	0.152311	0.499385	-1.00177	down	-	-
MW0144749	Ala-Thr-Leu-Asp	Ala-Thr-Leu-Asp	Amino acids and derivatives	氨基酸及其衍生物	Amino acids and derivatives	氨基酸及其衍生物	C17H30N4O8	3	0.5811	-	17928.8	20919.8	35344.5	50387.4	65648.1	87584.3	1.29057	0.0387106	0.158682	0.364371	-1.45652	down	-	-
MW0153694	Met-Trp-Trp	甲硫氨酰-色氨酸-色氨酸	Amino acids and derivatives	氨基酸及其衍生物	Amino acids and derivatives	氨基酸及其衍生物	C27H31N5O4S1	3	0.5769	-	58760.3	64742.5	110444	15525.9	35631.3	16877.6	1.31415	0.0617359	0.198291	3.43863	1.78183	up	-	-
MW0145305	Arg-Asp-Tyr	L-精氨酰-L-天冬氨酰-L-酪氨酸	Amino acids and derivatives	氨基酸及其衍生物	Amino acids and derivatives	氨基酸及其衍生物	C19H28N6O7	3	0.5763	-	45403.1	47820.6	54531.1	109520	99840.6	111185	1.43936	0.000300569	0.029247	0.460948	-1.11732	down	-	-
MW0145426	Arg-Leu-Trp	L-精氨酰-L-亮氨酰-L-色氨酸	Amino acids and derivatives	氨基酸及其衍生物	Amino acids and derivatives	氨基酸及其衍生物	C23H35N7O4	3	0.5759	-	2788.76	7320.6	5611.73	22112.6	10987.1	8481.81	1.12665	0.167305	0.341679	0.378078	-1.40324	down	-	-
MW0150316	Gly-Asn-Tyr	甘氨酸-天门冬酰氨-酪氨酸	Amino acids and derivatives	氨基酸及其衍生物	Amino acids and derivatives	氨基酸及其衍生物	C15H20N4O6	3	0.5749	-	36023.7	41776.8	36356.8	91017.3	145767	96066	1.39942	0.0514334	0.181898	0.342969	-1.54385	down	-	-
MW0153645	Met-Pro-Glu	甲硫氨酰-脯氨酰-谷氨酸	Amino acids and derivatives	氨基酸及其衍生物	Amino acids and derivatives	氨基酸及其衍生物	C15H25N3O6S1	3	0.5737	-	107884	90947.1	56903	22677.3	27057	69784.3	1.06002	0.0991705	0.255073	2.1397	1.09741	up	-	-
MW0049318	[(2S)-2-[11-(3,4-dimethyl-5-pentylfuran-2-yl)undecanoyloxy]-3-hydroxypropyl] 11-(3,4-dimethyl-5-pentylfuran-2-yl)undecanoate	[(2S)-2-[11-(3,4-dimethyl-5-pentylfuran-2-yl)undecanoyloxy]-3-hydroxypropyl] 11-(3,4-dimethyl-5-pentylfuran-2-yl)undecanoate	GL	甘油脂类	DG	甘油二酯	C47H80O7	3	0.5736	-	9053.34	18268	14125.3	42565.7	38022.5	27665.7	1.31689	0.0188749	0.116237	0.382866	-1.38509	down	-	-
MW0155179	Phe-Glu-His-Phe-Leu	Phe-Glu-His-Phe-Leu	Amino acids and derivatives	氨基酸及其衍生物	Amino acids and derivatives	氨基酸及其衍生物	C35H45N7O8	3	0.5732	-	20465.3	13300.3	13204.7	7325.17	6519.29	8399.87	1.33278	0.0690478	0.211982	2.11156	1.07831	up	-	-
MW0142494	2'-N-Acetylparomamine	2-N-乙酰基苯基丙胺	Alcohol and amines	醇、胺类	Amines	胺类	C14H27N3O8	3	0.5718	-	41951.1	34894.7	37763.4	94454.6	62103	79225.6	1.37294	0.0440182	0.16947	0.486079	-1.04074	down	C17582	ko00524,ko01110
MW0146224	Asp-Phe-Phe	L-天冬氨酸-L-苯丙氨酸-L-苯丙氨酸	Amino acids and derivatives	氨基酸及其衍生物	Amino acids and derivatives	氨基酸及其衍生物	C22H25N3O6	3	0.5714	-	10649	4067.67	13300.4	18094.9	28048	28069.5	1.15445	0.0246964	0.129692	0.377525	-1.40536	down	-	-
MW0148655	Docosanedioic acid	二十二烷二酸	Lipids	脂质	Free fatty acids	游离脂肪酸	C22H42O4	3	0.5705	-	36490.4	41776	28558.2	39952.8	109363	109820	1.09442	0.15699	0.329491	0.412234	-1.27847	down	C19625	ko00073
MW0157824	Thr-Trp-Glu	苏氨酸-色氨酸-谷氨酸	Amino acids and derivatives	氨基酸及其衍生物	Amino acids and derivatives	氨基酸及其衍生物	C20H26N4O7	3	0.5698	-	36833	18105.5	27642	69506.6	76391.4	71188	1.34148	0.00752688	0.0851822	0.380404	-1.39439	down	-	-
MW0166703	L-4-hydroxyphenylglycine-L-arginyl-D-4-hydroxyphenylglycine-L-seryl-L 4-hydroxyphenylglycine	L-4-羟基苯基甘氨酸-L-精氨酰-D-4-羟基苯基甘氨酸-L-seryl-L 4-羟基苯基甘氨酸	Amino acids and derivatives	氨基酸及其衍生物	Amino acids and derivatives	氨基酸及其衍生物	C33H41N8O10+	3	0.5677	-	1491.58	1626.39	3492.83	11739.2	11525.9	11551.4	1.38514	0.00433769	0.0709222	0.189876	-2.39687	down	-	-
ZINC33832512	5-Hydroxy-4-methoxybisabola-2,10-dien-9-one	（6S)-6-[（1R，4S，5S)-5-羟基-4-甲氧基-4-甲基环己-2-烯-1-基]-2-甲基庚-2-烯-4-酮	Others	其它类	Ketone compounds	酮类化合物	C16H26O3	3	0.5676	-	42266.1	35730.4	30842.3	83668.5	86940.6	86622	1.43467	0.00226821	0.0585124	0.423117	-1.24087	down	-	-
MW0108144	Met-Asn-Lys	L-蛋氨酸-L-天冬酰胺-L-赖氨酸	Amino acids and derivatives	氨基酸及其衍生物	Amino acids and derivatives	氨基酸及其衍生物	C15H29N5O5S1	3	0.5676	-	31086.4	31161.2	14681.6	61531.2	47887.2	55834.3	1.25471	0.0148801	0.105733	0.465524	-1.10307	down	-	-
MW0157786	Thr-Pro-Pro-Val-Gln	Thr-Pro-Pro-Val-Gln	Amino acids and derivatives	氨基酸及其衍生物	Amino acids and derivatives	氨基酸及其衍生物	C24H40N6O8	3	0.5666	-	288675	241550	258582	36518.6	45653.4	41070	1.45821	0.00292594	0.0655864	6.40046	2.67818	up	-	-
MW0153074	Lys-Met-Glu	L-赖氨酸-L-蛋氨酸-L-谷氨酸	Amino acids and derivatives	氨基酸及其衍生物	Amino acids and derivatives	氨基酸及其衍生物	C16H30N4O6S1	3	0.5658	-	646918	537058	520189	140484	200381	172993	1.43418	0.00396361	0.0686236	3.31641	1.72962	up	-	-
MEDL01851	Saponin D	皂角苷 D	Terpenoids	萜类	Triterpene Saponin	三萜皂苷	C48H78O17	3	0.5646	-	15299.5	19929.6	9744.35	5013.83	8930.01	7249.41	1.16881	0.100424	0.256308	2.12207	1.08547	up	-	-
MW0166629	pelargonidin 3-O-beta-D-p-coumaroylglucoside	天竺葵素 3-O-β-Dp-香豆酰葡糖苷	Others	其它类	Lactones	内酯类化合物	C30H25O12-	3	0.5632	-	21963.2	20415.9	36877.7	65871.3	58878	44103	1.25493	0.0242354	0.12925	0.469385	-1.09116	down	-	-
MW0128600	[2-ethyl-5-(3,5,7-trihydroxy-3,4-dihydro-2H-1-benzopyran-2-yl)phenyl]oxidanesulfonic acid	[2-乙基-5-(3，5，7-三羟基-3，4-二氢-2H-1-苯并吡喃-2-基）苯基]氧代磺酸	Organic acids	有机酸	Organic acids	有机酸	C17H18O8S	3	0.5624	-	18227.8	24647.3	9869.59	40184.2	39473.5	30681.8	1.21616	0.0258269	0.1333	0.478022	-1.06485	down	-	-
MW0146192	Asp-Lys-Phe	L-天冬氨酰-L-赖氨酰-L-苯丙氨酸	Amino acids and derivatives	氨基酸及其衍生物	Amino acids and derivatives	氨基酸及其衍生物	C19H28N4O6	3	0.5615	-	401552	406755	398478	158238	195976	204589	1.43398	0.00350861	0.0665633	2.15959	1.11076	up	-	-
MW0151060	His-Pro-Glu	组氨酸-脯氨酸-谷氨酸	Amino acids and derivatives	氨基酸及其衍生物	Amino acids and derivatives	氨基酸及其衍生物	C16H23N5O6	3	0.5608	-	47909.1	32459.9	37604.5	91654.7	78645.3	87593	1.39556	0.0015977	0.0494223	0.457451	-1.12831	down	-	-
MW0013070	2,2,4,4-Tetramethyl-6-(1-oxobutyl)-1,3,5-cyclohexanetrione	2,2,4,4-四甲基-6-(1-氧丁基)-1,3,5-环己三酮	Others	其它类	Ketone compounds	酮类化合物	C14H20O4	3	0.5594	-	14026.2	9690.97	14082.4	1038.15	1684.61	683.53	1.42928	0.0130366	0.100753	11.097	3.4721	up	-	-
MW0161844	Cocaine(1+)	可卡因（1+）	Organic acids	有机酸	Organic acids	有机酸	C17H22NO4+	3	0.5577	-	72.24	129.62	75.03	278.87	192.46	184.47	1.31271	0.032007	0.146752	0.422217	-1.24394	down	-	-
ZINC14610514	mulberrofuran Z	桑黄呋喃Z	Heterocyclic compounds	杂环化合物	Heterocyclic compounds	杂环化合物	C30H36O5	3	0.5544	-	579190	513814	420261	102343	87291.4	48343.1	1.41153	0.00641746	0.0806448	6.35885	2.66876	up	-	-
MW0068693	TG(14:1(9Z)/22:4(7Z,10Z,13Z,16Z)/22:4(7Z,10Z,13Z,16Z))	TG(14:1(9Z)/22:4(7Z,10Z,13Z,16Z)/22:4(7Z,10Z,13Z,16Z))	GL	甘油脂类	TG	甘油三酯	C61H100O6	3	0.5535	-	79865.2	160149	95955.8	180369	290024	374985	1.2345	0.0776903	0.224141	0.397419	-1.33127	down	-	-
MW0158928	Val-Asn-Tyr-Val-Asn	Val-Asn-Tyr-Val-Asn	Amino acids and derivatives	氨基酸及其衍生物	Amino acids and derivatives	氨基酸及其衍生物	C27H41N7O9	3	0.5527	-	98273.5	93738.8	67454	33051	26753.3	24747.4	1.40486	0.0205141	0.118789	3.06873	1.61764	up	-	-
ZINC44351483	Tetrahydrobungeanool	四氢花椒素	Alkaloids	生物碱	Alkaloids	生物碱	C18H33NO2	3	0.5484	-	282115	393543	539944	66160	74619.3	63778	1.43337	0.0454869	0.171509	5.9426	2.57109	up	-	-
MW0150403	Gly-Leu-Gln	甘氨酸-亮氨酸-谷酰胺	Amino acids and derivatives	氨基酸及其衍生物	Amino acids and derivatives	氨基酸及其衍生物	C13H24N4O5	3	0.5483	-	262336	345854	361351	1.28609e+06	1.00506e+06	756958	1.39119	0.0407579	0.16295	0.31808	-1.65254	down	-	-
MW0106886	Glu-Arg-Lys	谷氨酸-精氨酸-赖氨酸	Amino acids and derivatives	氨基酸及其衍生物	Amino acids and derivatives	氨基酸及其衍生物	C17H33N7O6	3	0.5455	-	1299.95	3119.06	961.46	18585.1	8840.2	10710.2	1.36926	0.0610227	0.197865	0.141088	-2.82533	down	-	-
MW0156666	Ser-Asn-Ser	L-丝氨酰-L-天冬酰胺酰-L-丝氨酸	Amino acids and derivatives	氨基酸及其衍生物	Amino acids and derivatives	氨基酸及其衍生物	C10H18N4O7	3	0.5397	-	125770	107721	127320	51950.6	35660.9	11695.4	1.24495	0.0066986	0.082884	3.63329	1.86128	up	-	-
MW0134069	5,7-dihydroxy-2-(4-hydroxy-3-methoxyphenyl)-3,6-dimethoxy-3,4-dihydro-2H-1-benzopyran-4-one	5，7-二羟基-2-(4-羟基-3-甲氧基苯基)-3，6-二甲氧基-3，4-二氢-2H-1-苯并吡喃-4-酮	Benzene and substituted derivatives	苯及其衍生物	Benzene and substituted derivatives	苯及其衍生物	C18H18O8	3	0.5382	-	14161.4	14103	18643.4	32940.3	29940.6	42419.3	1.37538	0.0231521	0.126745	0.445468	-1.16661	down	-	-
MW0138767	Licoagrone	Licoagrone	Others	其它类	Ketone compounds	酮类化合物	C45H42O10	3	0.5378	-	977.44	2837.91	1456.39	6013.22	6448.79	3988	1.2808	0.0196658	0.117287	0.32047	-1.64174	down	-	-
MW0116533	1,10-Dihydroxy-8-(hydroxymethyl)naphtho[1,2-c]isochromen-6-one	1,10-Dihydroxy-8-(hydroxymethyl)naphtho[1,2-c]isochromen-6-one	Others	其它类	Ketone compounds	酮类化合物	C18H12O5	3	0.5358	-	14940.1	8400.8	8072.47	4150.78	3969.49	4359.36	1.32771	0.105615	0.262223	2.51718	1.33181	up	-	-
ZINC44281721	(4aS,6aR,6aS,6bR,8aR,10S,12aR,14bS)-2,2,6a,6b,9,9,12a-heptamethyl-10-[(2S,3R,4S,5S)-3,4,5-trihydroxyoxan-2-yl]oxy-1,3,4,5,6,6a,7,8,8a,10,11,12,13,14b-tetradecahydropicene-4a-carboxylic acid	（4aS，6aR，6aS，6Br，8aR，10S，12aR，14bS)-2，2，6a，6B，9，9，12a-七甲基-10-[（2S，3R，4S，5S)-3，4，5-三羟基恶烷-2-基]氧基-1，3，4，5，6，6a，7，8，8A，10，11，12，13，14b-十四氢吡喃-4a-	Organic acids	有机酸	Organic acids	有机酸	C35H56O7	3	0.5356	-	36990	38925.2	45983.8	12387.6	10600.8	7737.92	1.43029	0.00238953	0.0592911	3.96724	1.98814	up	-	-
MW0161268	Geranate	天竺葵	Others	其它类	Lactones	内酯类化合物	C10H15O2-	3	0.5246	-	2821.19	1585.38	2221.09	6542.56	6055.04	3126.05	1.19872	0.092548	0.244825	0.421509	-1.24636	down	-	-
MW0159241	Val-Val-Ile	缬氨酸-缬氨酸-异亮氨酸	Amino acids and derivatives	氨基酸及其衍生物	Amino acids and derivatives	氨基酸及其衍生物	C16H31N3O4	3	0.5232	-	2074.53	4258.12	3319.68	5317.56	50013.1	22812.6	1.14715	0.220995	0.396374	0.123521	-3.01717	down	-	-
MW0154398	Neu5Ac2-3[GalNAc1-4]Gal1-4GlcNAcSp	Neu5Ac2-3[GalNAc1-4]Gal1-4GlcNAcSp	Others	其它类	Saccharides	糖类	C35H58N6O24	3	0.522	-	19262.4	11380.8	18507.5	70011.5	52129.3	49858	1.38777	0.0138069	0.103233	0.285762	-1.80711	down	-	-
MW0166143	(2R,3S,4S,5R,6S)-2-(hydroxymethyl)-6-[6-[[(3S)-3-methyl-4-[(2S,3R,4S,5S,6R)-3,4,5-trihydroxy-6-(hydroxymethyl)oxan-2-yl]oxybutyl]amino]purin-9-yl]oxane-3,4,5-triol	(2R,3S,4S,5R,6S)-2-(羟甲基)-6-[6-[[(3S)-3-甲基-4-[(2S,3R,4S,5S,6R)-3, 4,5-trihydroxy-6-(hydroxymethyl)oxan-2-yl]oxybutyl]amino]purin-9-yl]oxane-3,4,5-triol	Alcohol and amines	醇、胺类	Alcohols	醇类	C22H35N5O11	3	0.5207	-	301.06	1725.36	981.21	11579.1	10985.8	11090.8	1.36626	0.000320426	0.029247	0.0893647	-3.48415	down	-	-
MW0158136	Trp-Gln-Phe	色氨酸-谷氨酰胺-苯丙氨酸	Amino acids and derivatives	氨基酸及其衍生物	Amino acids and derivatives	氨基酸及其衍生物	C25H29N5O5	3	0.5197	-	17671.1	18348.5	42953.6	7701.19	10886.3	1091.97	1.0876	0.129149	0.293607	4.01297	2.00467	up	-	-
MW0166247	Decarboxy-demycosaminyl-nystatin	脱羧-脱霉胺基制霉菌素	Others	其它类	Ketone compounds	酮类化合物	C41H66O12	3	0.5168	-	56266.9	42703	34676.1	17926.8	7192.4	26719.3	1.14151	0.0327357	0.147613	2.57812	1.36632	up	-	-
MW0156880	Ser-Phe-Tyr	L-丝氨酰-L-苯丙氨酰-L-酪氨酸	Amino acids and derivatives	氨基酸及其衍生物	Amino acids and derivatives	氨基酸及其衍生物	C21H25N3O6	3	0.5146	-	67734.6	57385.9	105496	4838.01	15221.6	10381	1.38529	0.0400445	0.161713	7.57596	2.92143	up	-	-
MW0151655	Ile-Val-Phe	L-异亮氨酸-L-缬氨酸-L-苯丙氨酸	Amino acids and derivatives	氨基酸及其衍生物	Amino acids and derivatives	氨基酸及其衍生物	C20H31N3O4	3	0.511	-	45385.9	105136	65442.7	14351.6	17049.3	14088.3	1.38147	0.0832244	0.23082	4.74759	2.2472	up	-	-
MW0105783	Asn-Leu-Arg	L-天冬酰胺-L-亮氨酰-L-精氨酸	Amino acids and derivatives	氨基酸及其衍生物	Amino acids and derivatives	氨基酸及其衍生物	C16H31N7O5	3	0.5084	-	4605.85	4026.65	4692.94	41210.9	58240.2	37535.1	1.44782	0.0230142	0.126374	0.0972758	-3.36177	down	-	-
MW0130510	2-[(2-Hydroxyphenyl)methyl]propanedioic acid	2-[（2-羟基苯基）甲基]丙二酸	Organic acids	有机酸	Organic acids	有机酸	C10H10O5	3	0.5038	-	16071.2	10435.4	13060.2	46530.2	34151.3	31665.3	1.38722	0.0238572	0.128568	0.352185	-1.50559	down	-	-
MW0145567	Arg-Val-Lys	L-精氨酰-L-缬氨酰-L-赖氨酸	Amino acids and derivatives	氨基酸及其衍生物	Amino acids and derivatives	氨基酸及其衍生物	C17H35N7O4	3	0.503	-	88757.9	65707.5	132747	31828.4	31385.7	19748.5	1.36155	0.0689718	0.211982	3.46195	1.79158	up	-	-
MW0138338	3-[(2R,3R,4R,5S)-3,4-dihydroxy-5-(hydroxymethyl)oxolan-2-yl]oxy-2-(3,4-dihydroxyphenyl)-5,7-dihydroxychromen-4-one	槲皮素-3-O-阿拉伯糖苷(番石榴苷)	Flavonoids	黄酮	Flavonols	黄酮醇	C20H18O11	2	0.949	22255-13-6	926627	600972	321778	801069	1.75192e+06	2.87936e+06	1.07841	0.177817	0.352896	0.340438	-1.55454	down	-	-
MW0139773	Syringetin-3-o-glucoside	丁香亭-3-O-葡萄糖苷	Flavonoids	黄酮	Flavonols	黄酮醇	C23H24O13	2	0.9422	40039-49-4	1.17834e+06	993045	630280	197127	246540	341384	1.35508	0.0450861	0.170563	3.56877	1.83543	up	-	-
MW0107553	Isobutyrylglycine	异丁酰甘氨酸	Amino acids and derivatives	氨基酸及其衍生物	Amino acids and derivatives	氨基酸及其衍生物	C6H11NO3	2	0.9265	15926-18-8	41059.9	64022.9	22320.9	183488	128091	166645	1.34662	0.00587533	0.0778901	0.26641	-1.90828	down	-	-
MEDL00392	1-(9Z-octadecenoyl)-sn-glycero-3-phosphocholine	1-(9Z-十八烯酰基)-sn-glycero-3-phosphocholine	Lipids	脂质	LPC	溶血磷脂酰胆碱	C26H52NO7P	2	0.9254	19420-56-5	21903.1	17750	21654.4	4740.93	6041.68	11756.9	1.30103	0.0111421	0.0965916	2.72	1.44361	up	-	-
MW0114532	3-Indolylmethyl glucosinolate	3-吲哚基甲基硫苷	Others	其它类	Glucosinolates	硫苷类	C16H20N2O9S2	2	0.9227	4356-52-9	107906	143444	65448.5	66844.2	33731.7	38604.5	1.13887	0.103002	0.259041	2.27617	1.18661	up	-	-
MW0103572	GDP-glucose	GDP-葡萄糖	Nucleotides and derivatives	核苷酸及其衍生物	Nucleotides and derivatives	核苷酸及其衍生物	C16H25N5O16P2	2	0.9096	5750-57-2	78129.5	63443.8	32391.7	19020.9	20789.3	38900.3	1.07433	0.127827	0.291888	2.21019	1.14417	up	-	-
MEDP1568	Xanthosine-5'-monophosphate	黄嘌呤-5'-单磷酸	Nucleotides and derivatives	核苷酸及其衍生物	Nucleotides and derivatives	核苷酸及其衍生物	C10H13N4O9P	2	0.899	523-98-8	30346.8	40001.7	24461	7217.17	6772.69	18249	1.24307	0.0252822	0.131439	2.94084	1.55623	up	C00655	ko00230,ko01100,ko01110,ko01232
MW0052644	escin Ib	七叶皂苷	Steroids	甾体	Steroid	甾体	C55H86O24	2	0.897	26339-90-2 | 6805-41-0	36354.8	54024.2	48034.4	2844.78	5587.98	11304.6	1.35984	0.0072124	0.0842626	7.01277	2.80998	up	C08921	-
MW0138805	Lobaric acid	洛巴酸	Organic acids	有机酸	Organic acids	有机酸	C25H28O8	2	0.8955	522-53-2	1025.73	613.85	11333.2	92624	72677	14393.1	1.1917	0.138582	0.305763	0.0721939	-3.79198	down	-	-
MW0169603	Osajin	Osajin	Flavonoids	黄酮	Isoflavones	异黄酮	C25H24O5	2	0.8874	482-53-1	770.12	12082	14408.9	32359.2	22123.7	50013.5	1.00647	0.0674767	0.210084	0.26088	-1.93854	down	-	-
MW0011760	[6]-Gingerdiol 3,5-diacetate	[6]-姜二醇3，5-二乙酸酯	Others	其它类	Lactones	内酯类化合物	C21H32O6	2	0.864	195204-05-8	16558.5	1734.45	11674.2	31414.2	55044.6	143661	1.15017	0.188311	0.363279	0.130224	-2.94093	down	-	-
MW0149467	Ganoderic acid A	7,15-二羟基-3,11,23-三氧代羊毛甾-8-烯-26-酸 (灵芝酸 A)	Terpenoids	萜类	Triterpene	三萜	C30H44O7	2	0.8441	81907-62-2	801852	577224	480503	102476	102948	126705	1.43192	0.032444	0.147258	5.59896	2.48516	up	-	-
MW0053618	2-[4,5-dihydroxy-6-(hydroxymethyl)-2-[[12-hydroxy-4,4,8,10,14-pentamethyl-17-[6-methyl-2-[3,4,5-trihydroxy-6-[(3,4,5-trihydroxyoxan-2-yl)oxymethyl]oxan-2-yl]oxyhept-5-en-2-yl]-2,3,5,6,7,9,11,12,13,15,16,17-dodecahydro-1H-cyclopenta[a]phenanthren-3-yl]oxy]oxan-3-yl]oxy-6-(hydroxymethyl)oxane-3,4,5-triol	人参皂苷 Rb2	Terpenoids	萜类	Triterpene Saponin	三萜皂苷	C53H90O22	2	0.8258	11021-13-9	166276	198909	206373	79999.5	77801.5	77770.1	1.44648	0.0116458	0.0967	2.42627	1.27874	up	-	-
MW0158681	Tyr-Ala	L-酪氨酸-L-丙氨酸	Amino acids and derivatives	氨基酸及其衍生物	Amino acids and derivatives	氨基酸及其衍生物	C12H16N2O4	2	0.8078	730-08-5	130863	119061	168354	439555	431308	251071	1.33106	0.055347	0.189001	0.372819	-1.42345	down	-	-
MW0055473	(-)-Oleoside 11-methyl ester	木樨榄苷-11-甲酯	Terpenoids	萜类	Monoterpenoids	倍萜	C17H24O11	2	0.8047	60539-23-3	2.58278e+06	2.51418e+06	2.76297e+06	6.28353e+06	5.61934e+06	4.33928e+06	1.39148	0.0373219	0.156344	0.483922	-1.04715	down	-	-
MW0110241	Tyr-Asp	酪氨酸-天冬氨酸	Amino acids and derivatives	氨基酸及其衍生物	Amino acids and derivatives	氨基酸及其衍生物	C13H16N2O6	2	0.8029	87085-11-8	6988.68	15385.1	7027.1	14661.2	193445	69321.2	1.10698	0.25826	0.428892	0.105977	-3.23818	down	-	-
MEDN0431	N2,N2-Dimethylguanosine	2-(二甲基氨基)鸟苷	Nucleotides and derivatives	核苷酸及其衍生物	Nucleotides and derivatives	核苷酸及其衍生物	C12H17N5O5	2	0.7983	2140-67-2	95977.1	74633.2	108216	32683.1	56238.6	49269.8	1.29898	0.0213912	0.121419	2.01768	1.0127	up	C74036	-
MW0114515	Gentianose	龙胆糖	Others	其它类	Saccharides	糖类	C18H32O16	2	0.7956	25954-44-3	240926	221837	290857	84790.3	85631.6	100328	1.44275	0.0121724	0.0983406	2.78346	1.47688	up	C08239	-
MW0168280	Piscidic acid	番石榴酸	Phenolic acids	酚酸类	Phenolic acids	酚酸类	C11H12O7	2	0.7949	35388-57-9	667993	504089	743422	265839	306357	259122	1.41004	0.0316556	0.146584	2.30418	1.20425	up	-	-
MW0103360	3',5'-Cyclic IMP	3'，5'-环肌苷单磷酸	Nucleotides and derivatives	核苷酸及其衍生物	Nucleotides and derivatives	核苷酸及其衍生物	C10H11N4O7P	2	0.7784	3545-76-4	96662.4	184254	121676	33276.8	6875.65	33485.1	1.2443	0.040615	0.162741	5.46722	2.45081	up	C00943	-
MW0061068	Perillic acid	紫苏酸	Terpenoids	萜类	Terpene	萜类	C10H14O2	2	0.7777	7694-45-3	45221.1	72111.5	132928	271133	267379	145817	1.18343	0.0508241	0.180708	0.365702	-1.45126	down	C11924	-
MW0118899	3-(2-Thienyl)acrylic acid	2-噻吩丙烯酸	Organic acids	有机酸	Organic acids	有机酸	C7H6O2S	2	0.7763	1124-65-8 | 15690-25-2	37254.7	36459.7	45940	211703	153362	122033	1.4146	0.0414621	0.16401	0.245648	-2.02534	down	-	-
MW0152607	Leu-His	L-亮氨酸-L-组氨酸	Amino acids and derivatives	氨基酸及其衍生物	Amino acids and derivatives	氨基酸及其衍生物	C12H20N4O3	2	0.7736	38062-72-5	77736.6	80464.3	100212	234134	171192	257258	1.39267	0.0275134	0.137427	0.390008	-1.35842	down	-	-
MW0006987	Epsilon-pyrromycinone	芸香酮	Benzene and substituted derivatives	苯及其衍生物	Benzene and substituted derivatives	苯及其衍生物	C22H20O9	2	0.7702	21288-61-9	33997.4	43480.9	25233.7	70295.2	61998.4	89501.4	1.33192	0.0204074	0.118789	0.463094	-1.11062	down	-	-
MW0129522	2',4-Dihydroxy-4',6'-dimethoxychalcone	黄卡瓦胡椒素 C	Flavonoids	黄酮	Chalcones	查耳酮	C17H16O5	2	0.7701	37308-75-1	13657.8	15566	8133.47	2221.3	4229.59	5550.45	1.25872	0.0464364	0.173203	3.11276	1.63819	up	-	-
MW0109976	Threonyl-valine	苏氨酰缬氨酸	Amino acids and derivatives	氨基酸及其衍生物	Amino acids and derivatives	氨基酸及其衍生物	C9H18N2O4	2	0.7671	99032-17-4	120190	119020	120019	56952.4	64886.1	47531.4	1.4249	0.00601111	0.0790129	2.12097	1.08472	up	-	-
MEDTN00017	Inositol 1-phosphate	1-磷酸肌醇	Organic acids	有机酸	Organic acids	有机酸	C6H13O9P	2	0.7652	15421-51-9 | 2831-74-5 | 573-35-3	43459.5	62362	19603.7	10719	16060.1	25481.9	1.00195	0.178592	0.353607	2.39998	1.26302	up	C01177	ko00562,ko01100,ko02010,ko04070
MW0110330	Val-Ala	缬氨酸-丙氨酸	Amino acids and derivatives	氨基酸及其衍生物	Amino acids and derivatives	氨基酸及其衍生物	C8H16N2O3	2	0.7639	27493-61-4	36097	45548.8	35973.4	13179.8	20552.1	14017.5	1.37987	0.00532482	0.0752923	2.46326	1.30057	up	-	-
MW0158729	Tyrosyl-tryptophan	酪氨酰色氨酸	Amino acids and derivatives	氨基酸及其衍生物	Amino acids and derivatives	氨基酸及其衍生物	C20H21N3O4	2	0.7632	60815-41-0	18082.8	12790.3	14199.3	80084.3	86030.1	71943.6	1.44666	0.00145707	0.0494223	0.189334	-2.401	down	-	-
MW0151670	Ile-His	L-异亮氨酸-L-组氨酸	Amino acids and derivatives	氨基酸及其衍生物	Amino acids and derivatives	氨基酸及其衍生物	C12H20N4O3	2	0.7616	97284-12-3	43336.8	36956.3	30400.9	84056.3	76623.6	94236.8	1.41465	0.00227043	0.0585124	0.434236	-1.20345	down	-	-
MW0103490	CDP-ethanolamine	胞苷-5'-二磷酸乙醇胺	Nucleotides and derivatives	核苷酸及其衍生物	Nucleotides and derivatives	核苷酸及其衍生物	C11H20N4O11P2	2	0.7596	3036-18-8	1203.69	421.92	4407.69	8736.94	9269.8	13354.1	1.19026	0.0121406	0.0983406	0.192383	-2.37795	down	C00570	ko00564,ko01100
MW0103561	Flavin mononucleotide	黄素单核苷酸(FMN)	Nucleotides and derivatives	核苷酸及其衍生物	Nucleotides and derivatives	核苷酸及其衍生物	C17H21N4O9P	2	0.7569	146-17-8	9652.84	10973.5	11618.2	27667.2	23689.3	23683.3	1.43893	0.00325351	0.0665633	0.4297	-1.2186	down	C00061	ko00190,ko00740,ko01100,ko01110,ko01240
MW0112794	Keto-Deoxy-Nonulonic acid	酮脱氧壬酸	Organic acids	有机酸	Organic acids	有机酸	C9H16O9	2	0.7516	153666-19-4	99680.4	111172	68594.8	7621.36	9827.08	32511.6	1.30651	0.0110254	0.0958017	5.59341	2.48373	up	C20934	ko00520,ko01100,ko01250
MW0063740	(5E)-4,9-dihydroxy-6-methyl-3,10-dimethylidene-4,7,8,9,11,11a-hexahydro-3aH-cyclodeca[b]furan-2-one	他替林B	Terpenoids	萜类	Terpene	萜类	C15H20O4	2	0.7511	41653-76-3	982.63	4171.49	3066.65	6686.75	5952.88	6186.58	1.09686	0.0567994	0.190563	0.436666	-1.1954	down	-	-
MEDP0434	1-Heptadecanoyl-sn-glycero-3-phosphocholine	溶血磷脂酰胆碱 17:0	Lipids	脂质	LPC	溶血磷脂酰胆碱	C25H52NO7P	2	0.7494	50930-23-9	64616.9	61584.7	65872	25842.3	11800.2	29606.5	1.29562	0.0129361	0.10071	2.85615	1.51407	up	C04230	ko00564
MEDN0589	Cyclamic acid	甜蜜素	Organic acids	有机酸	Organic acids	有机酸	C6H13NO3S	2	0.7446	100-88-9	198045	144566	238565	649009	493059	272640	1.19068	0.118449	0.279981	0.41081	-1.28346	down	C02824	-
MW0002395	2,6-Naphthalenediol	2,6-二羟基萘	Benzene and substituted derivatives	苯及其衍生物	Benzene and substituted derivatives	苯及其衍生物	C10H8O2	2	0.7334	581-43-1	53551.9	52872.1	48608.3	13956.6	19285.7	26826.6	1.36289	0.0065105	0.0812062	2.58091	1.36788	up	-	-
MW0112757	3-Benzoyl-6-phenyl-pyran-2,4-dione	3-苯甲酰基-6-苯基-2H-吡喃-2,4（3H)-二酮	Benzene and substituted derivatives	苯及其衍生物	Benzene and substituted derivatives	苯及其衍生物	C18H12O4	2	0.7279	602-98-2	58219.6	57856.7	69034.2	252306	206749	190955	1.44112	0.0113706	0.0967	0.284781	-1.81208	down	-	-
MEDN1401	5-Phenylpenta-2,4-dienoic acid	5-苯基戊烷-2,4-双酸	Organic acids	有机酸	Organic acids	有机酸	C11H10O2	2	0.7274	1552-94-9 | 28010-12-0 | 185152-35-6 | 38446-98-9	411212	361551	563092	232305	200477	146772	1.34349	0.038326	0.157653	2.30497	1.20475	up	-	-
MW0138292	Glycitin	黄豆黄苷	Flavonoids	黄酮	Isoflavones	异黄酮	C22H22O10	2	0.7272	40246-10-4	62241.6	59714.3	82605.2	7801.59	37711.5	26361.5	1.15947	0.0186437	0.11608	2.84609	1.50898	up	-	-
MEDP1667	Phe-Glu	L-苯丙氨酰-L-谷氨酸	Amino acids and derivatives	氨基酸及其衍生物	Amino acids and derivatives	氨基酸及其衍生物	C14H18N2O5	2	0.727	3617-45-6	109298	85953.4	117961	24963.7	42033.3	39998.7	1.39053	0.00706956	0.0838945	2.92734	1.54959	up	-	-
MW0110101	Trp-Asp	色氨酸-天冬氨酸	Amino acids and derivatives	氨基酸及其衍生物	Amino acids and derivatives	氨基酸及其衍生物	C15H17N3O5	2	0.7257	71835-78-4	6745.34	10473.8	2934.82	882.63	81.5	683.76	1.23272	0.103451	0.259605	12.2302	3.61237	up	-	-
MW0139595	Robustic acid	辛酸	Organic acids	有机酸	Organic acids	有机酸	C22H20O6	2	0.725	5307-59-5	135227	137225	58661.1	317593	327444	309494	1.32567	0.0125359	0.0993444	0.346886	-1.52747	down	-	-
MW0109790	Hydroxypropanedioic acid	丙醇二酸	Organic acids	有机酸	Organic acids	有机酸	C3H4O5	2	0.718	80-69-3	10719.8	9855.35	6491.17	39433.8	32282.1	39777.7	1.43185	0.00191921	0.0528668	0.242761	-2.04239	down	C02287	-
MW0109227	Phenylalanylserine	苯丙氨酰丝氨酸	Amino acids and derivatives	氨基酸及其衍生物	Amino acids and derivatives	氨基酸及其衍生物	C12H16N2O4	2	0.715	16053-39-7	46559.3	30287.7	45412.1	112586	87791.6	103337	1.37676	0.00344489	0.0665633	0.402546	-1.31277	down	-	-
MEDP1613	Val-val	缬氨酸-缬氨酸	Amino acids and derivatives	氨基酸及其衍生物	Amino acids and derivatives	氨基酸及其衍生物	C10H20N2O3	2	0.7145	3918-94-3	531601	441977	569024	73561.3	98259.9	99661	1.45235	0.00579925	0.0776663	5.68215	2.50644	up	-	-
MW0007933	DL-2-(2,4-Dinitroanilino)-4-(methylsulphinyl)butyric acid	N-(2,4-二硝基苯基)-DL-蛋氨酸亚砜	Benzene and substituted derivatives	苯及其衍生物	Benzene and substituted derivatives	苯及其衍生物	C11H13N3O7S	2	0.7142	1695-02-9	277422	205910	130096	38220.3	61307.1	76518.5	1.30962	0.0672423	0.210084	3.48448	1.80094	up	-	-
MW0107036	Glu-Thr	谷氨酸-苏氨酸	Amino acids and derivatives	氨基酸及其衍生物	Amino acids and derivatives	氨基酸及其衍生物	C9H16N2O6	2	0.7118	6875-80-5	80484.7	201320	78030.9	160147	489319	611782	1.11881	0.14673	0.316075	0.285302	-1.80944	down	-	-
MW0139651	Santin	Santin	Flavonoids	黄酮	Flavones	黄酮	C18H16O7	2	0.7057	27782-63-4	6812.39	5439.63	7405.04	3112.93	1115.02	3810.38	1.15254	0.0211678	0.121108	2.44542	1.29008	up	-	-
MW0126431	Resorcinolnaphthalein	间苯二酚萘	Heterocyclic compounds	杂环化合物	Heterocyclic compounds	杂环化合物	C24H14O5	2	0.7041	41307-63-5	17278	25265.8	1556.41	81.26	1167.3	2653.94	1.00173	0.193025	0.366951	11.3005	3.49832	up	-	-
MW0009481	Piretanide	吡咯他尼	Benzene and substituted derivatives	苯及其衍生物	Benzene and substituted derivatives	苯及其衍生物	C17H18N2O5S	3	0.9781	55837-27-9	12680.6	13944.4	16333.2	59919.3	72387.6	49895.4	1.43398	0.0169891	0.111733	0.235772	-2.08453	down	-	-
MEDN0151	Adenine	腺嘌呤	Nucleotides and derivatives	核苷酸及其衍生物	Nucleotides and derivatives	核苷酸及其衍生物	C5H5N5	3	0.9705	73-24-5	77802	58485.9	20691.2	9125.84	9083.69	18790.3	1.18785	0.135287	0.300933	4.24269	2.08498	up	C00147	ko00230,ko00908,ko01100,ko01110,ko01232
MEDL02729	Traumatic acid	2-十二烯二酸	Lipids	脂质	Free fatty acids	游离脂肪酸	C12H20O4	3	0.9694	6402-36-4	64593.2	85251.8	67267	27517.1	27068.2	27450.4	1.43317	0.0200904	0.11785	2.64655	1.40412	up	C16308	ko00592,ko01110
MW0126947	Vidarabine	阿糖腺苷	Nucleotides and derivatives	核苷酸及其衍生物	Nucleotides and derivatives	核苷酸及其衍生物	C10H13N5O4	3	0.9636	24356-66-9	125930	81168.1	32454.2	4713.61	17862.3	32114	1.09905	0.141064	0.309327	4.38019	2.13099	up	C07195	-
MW0168671	Abietic acid	松香酸	Terpenoids	萜类	Ditepenoids	二萜	C20H30O2	3	0.9568	514-10-3	13195.5	11687.5	11242.2	22720.3	62603.9	155367	1.19996	0.224785	0.3998	0.15009	-2.7361	down	C06087	ko00904,ko01100,ko01110
MEDL00352	Glu-Val	谷氨酸-缬氨酸	Amino acids and derivatives	氨基酸及其衍生物	Amino acids and derivatives	氨基酸及其衍生物	C10H18N2O5	3	0.9554	5879-06-1	139587	172407	162764	66095	84146.8	76662.5	1.4184	0.00459887	0.0721689	2.09233	1.06511	up	-	-
MW0160148	Nocardamine	诺卡明	Others	其它类	Ketone compounds	酮类化合物	C27H48N6O9	3	0.9495	26605-16-3	7902.77	4152.8	2954.66	38142.9	12578.6	12313	1.2165	0.199683	0.374658	0.238127	-2.07019	down	-	-
MEDN1303	D-Mannose 1-phosphate	甘露糖1-磷酸	Others	其它类	Saccharides	糖类	C6H13O9P	3	0.9492	27251-84-9	833772	1.02225e+06	1.32409e+06	1.78933e+06	3.32367e+06	3.01205e+06	1.29058	0.0614926	0.198291	0.391397	-1.3533	down	-	-
MEDL01764	Maritimetin	海生菊苷	Flavonoids	黄酮	Other Flavonoids	其它类黄酮	C15H10O6	3	0.928	576-02-3	9235.01	29073.3	21242.7	48423.6	46791.3	49052.8	1.20725	0.0377133	0.156573	0.412781	-1.27655	down	C08720	-
MEDN1144	alpha-Dimorphecolic acid	9(S)-HODE	Lipids	脂质	Free fatty acids	游离脂肪酸	C18H32O3	3	0.925	73543-67-6	70782.5	114962	164920	302959	299080	134715	1.02928	0.131335	0.29611	0.475958	-1.07109	down	C14767	ko00591
MEDN0537	Adpribose	ADP核糖	Nucleotides and derivatives	核苷酸及其衍生物	Nucleotides and derivatives	核苷酸及其衍生物	C15H23N5O14P2	3	0.9232	20762-30-5	1823.18	4794.33	5264.03	1783.25	1904.08	1778.39	1.03753	0.185351	0.360941	2.17383	1.12024	up	C00301	ko00230,ko01100
MEDP0495	LPC(0:0/18:2)	溶血PC(0:0/18:2(9Z,12Z))	GP	甘油磷脂类	LPE	溶血磷脂酰乙醇胺	C26H50NO7P	3	0.9217	27304-12-7	728123	567215	540517	101611	163927	341911	1.25663	0.012686	0.0999376	3.02224	1.59562	up	-	-
MW0132666	Isolimocitrol	3,5,7-三羟基-2-(3-羟基-4-甲氧基苯基)-6,8-二甲氧基-4H-铬-4-酮	Others	其它类	Ketone compounds	酮类化合物	C18H16O9	3	0.9028	1171-97-7	33447	42023.1	33653.7	82119.7	73168.5	74773.7	1.43581	0.000519058	0.0348768	0.474323	-1.07606	down	-	-
MW0125719	N-Methyl-1-(10H-phenothiazin-10-yl)propan-2-amine	N-去甲基异丙嗪	Heterocyclic compounds	杂环化合物	Heterocyclic compounds	杂环化合物	C16H18N2S	3	0.8994	37707-23-6	9.70526e+06	8.42026e+06	1.0976e+07	4.06581e+06	4.29232e+06	4.32685e+06	1.44431	0.0167432	0.111713	2.29417	1.19797	up	-	-
MEDN1366	3,5-Dihydroxybenzoic acid	Α-雷锁辛甲酸	Organic acids	有机酸	Organic acids	有机酸	C7H6O4	3	0.8986	99-10-5	93488.6	90011.4	112543	31027.7	31282.4	46574.9	1.40622	0.00274788	0.0643947	2.71886	1.443	up	-	-
MW0133983	5,6-Dihydroxyflavone	5,6-Dihydroxyflavone	Others	其它类	Ketone compounds	酮类化合物	C15H10O4	3	0.895	6665-66-3	26712.2	47512.7	20355.7	34444.1	75354.2	99791.3	1.01899	0.171398	0.345912	0.451265	-1.14795	down	-	-
MW0123181	Butethal	布泰尔	Heterocyclic compounds	杂环化合物	Heterocyclic compounds	杂环化合物	C10H16N2O3	3	0.8849	77-28-1	68450.7	59028.9	69577.9	7278.15	11351.8	14675.6	1.42805	0.000422675	0.0326869	5.91667	2.56478	up	-	-
MEDP1592	Citicoline	胞磷胆碱	Nucleotides and derivatives	核苷酸及其衍生物	Nucleotides and derivatives	核苷酸及其衍生物	C14H26N4O11P2	3	0.8722	987-78-0	91991.9	103623	48094	5556.79	11164.4	46577.1	1.1384	0.0512035	0.1815	3.85016	1.94492	up	C00307	ko00564,ko01100
MW0146512	Bacopasaponin C	狗头皂苷C	Terpenoids	萜类	Triterpene Saponin	三萜皂苷	C46H74O17	3	0.8703	178064-13-6	6061.02	9205.6	4091.84	17817.8	21855	36227.5	1.34159	0.0691179	0.211982	0.255051	-1.97114	down	-	-
MW0139812	Thalsimine	塔尔西明	Heterocyclic compounds	杂环化合物	Heterocyclic compounds	杂环化合物	C38H40N2O7	3	0.8637	5525-36-0	1.09047e+06	740390	720117	360418	389734	443006	1.35883	0.0587342	0.193686	2.138	1.09626	up	C09661	-
MEDN1385	Daidzein	大豆苷元	Flavonoids	黄酮	Isoflavones	异黄酮	C15H10O4	3	0.8634	486-66-8	3868.65	4551.58	3861.9	779.45	1032.35	638.61	1.43768	0.00111415	0.0457491	5.01228	2.32547	up	C10208	ko00943,ko01100,ko01110
MEDL00331	3'-Aenylic Acid	腺苷-3'-磷酸	Nucleotides and derivatives	核苷酸及其衍生物	Nucleotides and derivatives	核苷酸及其衍生物	C10H14N5O7P	3	0.8605	84-21-9	48440.6	57247.1	80349.7	26944	29116.8	25396.5	1.37718	0.0653156	0.206166	2.28386	1.19147	up	C01367	ko00230,ko01100
MW0000169	Caseadine	酪胺	Alkaloids	生物碱	Alkaloids	生物碱	C20H23NO4	3	0.8533	34413-12-2	27983.5	29085.9	31165.8	11391.1	15664.3	9081.22	1.38519	0.0045055	0.0720311	2.44171	1.28789	up	C09377	-
MEDN0844	Stachyose	水苏糖	Others	其它类	Saccharides	糖类	C24H42O21	3	0.8513	470-55-3	52122.4	50604.7	52476.4	13654.3	2976.5	31201	1.08916	0.0483698	0.176642	3.24478	1.69812	up	C01613	ko00052,ko01100
MEDL00328	UDP-xylose	尿苷-5'-二磷酸-D-木糖	Nucleotides and derivatives	核苷酸及其衍生物	Nucleotides and derivatives	核苷酸及其衍生物	C14H22N2O16P2	3	0.835	3616-06-6	372872	285408	189041	80470.1	124062	165415	1.19524	0.0776906	0.224141	2.29038	1.19559	up	C00190	ko00520,ko00908,ko01100,ko01250
MW0000157	Bulbocapnine	球紫堇碱	Alkaloids	生物碱	Aporphine alkaloids	阿朴啡型生物碱	C19H19NO4	3	0.829	298-45-3	36811.7	31385	40743.4	11378.7	14019.1	7831.38	1.40452	0.00261412	0.0630781	3.27845	1.71301	up	C09367	-
MW0153343	Maltohexanose	麦芽六糖	Others	其它类	Saccharides	糖类	C36H62O31	3	0.8216	34620-77-4	804.1	1605.31	1101.88	83.46	314.46	347.85	1.25806	0.0460354	0.172261	4.70827	2.2352	up	C01936	-
MEDL01834	Capsianoside I	辣椒萜苷 I	Terpenoids	萜类	Ditepenoids	二萜	C32H52O14	3	0.7956	121924-04-7	128122	102939	86285.8	29809.9	23654	50519.7	1.33317	0.0115994	0.0967	3.05189	1.6097	up	-	-
MW0151998	Kandelin A-1	Kandelin?A-1；金鸡纳碱-1a-(4beta->8)-儿茶素	Flavonoids	黄酮	Flavones	黄酮	C39H32O15	3	0.7924	88903-77-9	7655.7	8260.12	1385.76	15613.1	16365.1	194852	1.0705	0.36207	0.521578	0.0762754	-3.71264	down	-	-
MEDN0092	3,4-Dihydroxybenzeneacetic acid	3,4-二羟基苯乙酸	Phenolic acids	酚酸类	Phenolic acids	酚酸类	C8H8O4	3	0.7845	102-32-9	15970.2	19039.3	22469.4	82243.3	57468.5	25327.3	1.16233	0.159898	0.332851	0.348274	-1.5217	down	C01161	ko00350,ko01100
MW0144376	Adiantifoline	阿地安托林	Alkaloids	生物碱	Alkaloids	生物碱	C42H50N2O9	3	0.7819	20823-96-5	189959	163669	96923.6	68316.6	72158.1	61265.7	1.26769	0.0938386	0.247393	2.23332	1.15919	up	C09323	-
MW0149164	Fetidine	非替丁	Alkaloids	生物碱	Alkaloids	生物碱	C40H46N2O8	3	0.779	7072-86-8	16039.2	19077.3	19279.5	1864.93	2844.26	2592.29	1.45029	0.00257611	0.0630781	7.44999	2.89724	up	C09441	-
MEDN0211	Pentitol	阿拉伯糖醇	Others	其它类	Saccharides	糖类	C5H12O5	3	0.7782	6917-36-8	25721	18993.4	34441.4	12831.8	12911.6	12059.1	1.33301	0.0905503	0.242163	2.09393	1.06621	up	-	-
MEDP1899	Benzoylecgonine	苯甲酰芽子碱	Benzene and substituted derivatives	苯及其衍生物	Benzene and substituted derivatives	苯及其衍生物	C16H19NO4	3	0.7776	519-09-5	548959	619523	555782	2.20642e+06	893817	1.50359e+06	1.27777	0.126531	0.290502	0.374529	-1.41685	down	-	-
MW0000475	Usambarensine	乌桑巴伦辛	Alkaloids	生物碱	Alkaloids	生物碱	C29H28N4	3	0.7762	36150-14-8	406423	372134	346440	1.08716e+06	811003	749433	1.40977	0.0362863	0.154501	0.424912	-1.23476	down	C09249	-
MW0150566	Glycobismine A	甘氨双胺A	Heterocyclic compounds	杂环化合物	Heterocyclic compounds	杂环化合物	C37H34N2O6	3	0.7754	91147-20-5	160358	124979	129413	74405.8	70815.2	19614.3	1.12899	0.0227646	0.125655	2.51615	1.33122	up	C10685	-
MW0154851	Palmatoside G	掌叶皂苷G	Heterocyclic compounds	杂环化合物	Heterocyclic compounds	杂环化合物	C25H32O10	3	0.7675	105597-95-3	1.50026e+06	1.32983e+06	1.41983e+06	4.1173e+06	3.5011e+06	3.71294e+06	1.45179	0.0036192	0.0672043	0.375059	-1.41481	down	C17507	-
MW0112119	2-Dodecenal	2-十二烯醛	Others	其它类	Aldehyde compounds	醛类化合物	C12H22O	3	0.7661	4826-62-4	54800.5	66323.6	74433.3	25108.6	19712.4	12780.1	1.38291	0.00440224	0.0711722	3.39503	1.76342	up	-	-
MW0130215	4H-1-Benzopyran-4-one, 2-(3,5-dihydroxyphenyl)-3,5,7-trihydroxy-	2-(3，5-二羟基苯基)-3，5，7-三羟基-4H-苯并吡喃-4-酮	Others	其它类	Ketone compounds	酮类化合物	C15H10O7	3	0.765	28449-61-8	207842	185041	238303	81507.8	92443	98447.6	1.43679	0.0104328	0.0948362	2.31714	1.21235	up	-	-
MW0141698	1-{[3-(3,4-Dihydroxyphenyl)acryloyl]oxy}-3,5-dihydroxycyclohexane-1-carboxylic acid	1-{[3-(3,4-二羟基苯基)丙烯酰基]氧基}-3,5-二羟基环己烷-1-羧酸	Organic acids	有机酸	Organic acids	有机酸	C16H18O8	3	0.7609	153444-59-8	2.58904e+06	2.89989e+06	3.46721e+06	1.15233e+06	1.7654e+06	1.50303e+06	1.35886	0.0112631	0.0965916	2.02593	1.01858	up	-	-
MW0147281	Ceanothine B	Ceanothine B	Amino acids and derivatives	氨基酸及其衍生物	Amino acids and derivatives	氨基酸及其衍生物	C29H36N4O4	3	0.7605	19471-43-3	75857.9	41781.3	76349.7	150781	134472	149420	1.30278	0.00958026	0.0931872	0.446287	-1.16396	down	C10001	-
MW0152007	Karwinskione	卡尔温斯基奥内	Lignans and Coumarins	木脂素和香豆素	Lignans	木脂素	C32H32O7	3	0.7586	59481-46-8	105717	137665	142230	34142.8	49294.6	36054.6	1.4223	0.00826771	0.0890073	3.22709	1.69024	up	C09944	-
MEDN0152	Adenosine 5'-Diphosphate（ADP）	腺苷-5'-二磷酸	Nucleotides and derivatives	核苷酸及其衍生物	Nucleotides and derivatives	核苷酸及其衍生物	C10H15N5O10P2	3	0.7555	58-64-0	8333.37	4033.9	12157.4	23058	15266.5	11975.2	1.02941	0.107706	0.265196	0.487572	-1.03631	down	C00008	ko00190,ko00195,ko00230,ko00908,ko01100,ko01110,ko01232,ko01240
MW0138241	Sophoricoside	槐角苷	Flavonoids	黄酮	Isoflavones	异黄酮	C21H20O10	3	0.7526	152-95-4	36187	77167.5	40961.1	104992	184766	236557	1.29029	0.0709564	0.215047	0.2932	-1.77004	down	-	-
MW0152837	Lycoricidine	石蒜西定; 7-脱氧水仙环素	Alkaloids	生物碱	Isoquinoline alkaloids	异喹啉类生物碱	C14H13NO6	3	0.7526	19622-83-4	675419	619588	206248	40177.4	36879	336470	1.0449	0.12165	0.28436	3.63037	1.86012	up	C08531	-
MW0158061	Trilobine	三叶草碱	Lignans and Coumarins	木脂素和香豆素	Lignans	木脂素	C35H34N2O5	3	0.7494	6138-73-4	3649.16	6924.45	6346.57	12886.7	24011	23539.3	1.32953	0.048666	0.177106	0.279964	-1.83669	down	C09669	-
MW0104838	2-Phenylglycine	2-苯甘氨酸	Amino acids and derivatives	氨基酸及其衍生物	Amino acids and derivatives	氨基酸及其衍生物	C8H9NO2	3	0.747	2835-06-5	132618	106542	192376	41707.8	40413.6	3637.29	1.1413	0.0282773	0.138696	5.03198	2.33113	up	-	-
MEDL01927	Benzoylmalic acid	苯甲酰苹果酸	Phenolic acids	酚酸类	Phenolic acids	酚酸类	C11H10O6	3	0.7439	22138-51-8	118106	129339	125231	295622	311696	311695	1.45852	4.1907e-05	0.0181342	0.405518	-1.30216	down	-	-
MW0133443	1-(4-Hydroxyphenyl)-1,2-diphenyl-1-butene	4-[（1E)-1,2-二苯基-1-烯-1-基]苯酚	Benzene and substituted derivatives	苯及其衍生物	Benzene and substituted derivatives	苯及其衍生物	C22H20O	3	0.7416	68684-63-9	25835.9	23278.8	23576	1383.66	2298.55	961.56	1.44083	0.000170691	0.0273488	15.6534	3.9684	up	-	-
MW0146836	Botrydial	Botrydial	Others	其它类	Lactones	内酯类化合物	C17H26O5	3	0.7402	54986-75-3	2.57694e+07	1.36803e+07	3.7326e+07	9.26087e+06	1.16011e+07	1.56152e+07	1.08196	0.181443	0.356434	2.10476	1.07366	up	C09622	-
MW0139010	Mulberrofuran A	桑呋喃A	Heterocyclic compounds	杂环化合物	Heterocyclic compounds	杂环化合物	C25H28O4	3	0.7401	68978-04-1	61029.7	93947.4	28854	238484	266290	272703	1.35111	0.00226645	0.0585124	0.236446	-2.08042	down	C08846	-
MW0137810	Cyanidin 3-O-[b-D-Xylopyranosyl-(1->2)-[(4-hydroxybenzoyl)-(->6)-b-D-glucopyranosyl-(1->6)]-b-D-galactopyranoside]	花青素 3-O-[bD-吡喃木糖基-(1->2)-[(4-羟基苯甲酰基)-(->6)-bD-吡喃葡萄糖基-(1->6)]-bD-吡喃半乳糖苷]	Flavonoids	黄酮	Anthocyanidins	花青素	C39H43O22+	3	0.7385	142506-20-5	86961.8	65664.5	68513.5	13972.4	12483.8	18403.6	1.43794	0.00894626	0.091316	4.92959	2.30147	up	-	-
MADP0570	7-Deazaadenosine	7-脱氮腺苷	Nucleotides and derivatives	核苷酸及其衍生物	Nucleotides and derivatives	核苷酸及其衍生物	C11H14N4O4	3	0.7372	69-33-0	453419	453389	367835	79026.2	133922	256372	1.23786	0.0192692	0.11637	2.71593	1.44145	up	-	-
MW0147841	Vertine	韦尔廷	Others	其它类	Ketone compounds	酮类化合物	C26H29NO5	3	0.7351	10308-13-1	45389.3	52250.7	22177.4	86438.7	101446	106221	1.28931	0.00890398	0.091316	0.407397	-1.29549	down	-	-
MEDL02757	Vanilloloside	香草醇苷	Phenolic acids	酚酸类	Phenolic acids	酚酸类	C14H20O8	3	0.7349	74950-96-2	45158.2	49125.1	46893.2	182971	190898	175731	1.46053	0.000526158	0.0348768	0.256871	-1.96088	down	-	-
MEDN1602	3'-Deoxyguanosine	3-脱氧鸟苷	Nucleotides and derivatives	核苷酸及其衍生物	Nucleotides and derivatives	核苷酸及其衍生物	C10H13N5O4	3	0.7349	3608-58-0	39406.5	31501.8	10185.8	667.39	4862.64	10709.7	1.05966	0.120203	0.282592	4.99357	2.32007	up	-	-
MW0008470	N-phenyl-5-pyridin-3-yl-1,3,4-thiadiazol-2-amine	N-phenyl-5-pyridin-3-yl-1,3,4-thiadiazol-2-amine	Benzene and substituted derivatives	苯及其衍生物	Benzene and substituted derivatives	苯及其衍生物	C13H10N4S	3	0.7266	35356-56-0	19180.8	17556.8	7479.74	60339.1	57813.2	39077.9	1.32419	0.0148598	0.105733	0.281227	-1.83019	down	-	-
MW0141754	1-Hydroxy-2-(beta-D-glucosyloxy)-9,10-anthraquinone	1-羟基-2-(β-D-葡萄糖基氧基)-9,10-蒽醌	Benzene and substituted derivatives	苯及其衍生物	Benzene and substituted derivatives	苯及其衍生物	C20H18O9	3	0.7266	31297-82-2	30019.6	15947.2	17111.3	53468.4	50258.4	26430.1	1.12015	0.102219	0.258754	0.484631	-1.04504	down	C04719	-
MEDP1057	D-inositol-4-phosphate	D-肌醇4-磷酸	Alcohol and amines	醇、胺类	Alcohols	醇类	C6H13O9P	3	0.7254	142760-33-6	333826	374061	420540	109726	121578	133990	1.44805	0.00626762	0.0803363	3.08909	1.62718	up	C03546	ko00562,ko01100,ko04070
MW0144055	8-Epiiridotrial glucoside	8-表环烯醚萜苷；草苁蓉总苷	Steroids	甾体	Steroid	甾体	C16H24O8	3	0.7203	72963-55-4	1.42661e+06	1.64796e+06	1.34069e+06	3.4005e+06	3.1969e+06	2.96311e+06	1.44374	0.000632191	0.0362144	0.461823	-1.11459	down	-	-
MEDL01901	2,3,4,5-tetrahydroxy-8-(3,5,7-trihydroxy-3,4-dihydro-2H-chromen-2-yl)benzo[7]annulen-6-one	茶黄棓灵	Tannins	鞣质	Tannin	鞣质	C20H16O9	3	0.713	102208-15-1	110678	79221.4	28745.8	145142	143701	186199	1.1046	0.0487419	0.177243	0.460265	-1.11946	down	-	-
MW0114030	Caffeic acid 3-glucoside	咖啡酸-3-葡萄糖苷	Phenolic acids	酚酸类	Phenolic acids	酚酸类	C15H18O9	3	0.709	24959-81-7	5952.46	22722.6	25535.9	74804.6	70820.2	60703	1.23721	0.00368138	0.0674307	0.262742	-1.92828	down	C10431	-
MW0007303	Heptyl 4-hydroxybenzoate	4-羟基苯甲酸庚酯	Benzene and substituted derivatives	苯及其衍生物	Benzene and substituted derivatives	苯及其衍生物	C14H20O3	3	0.7074	1085-12-7	19693.2	13358.2	18679.1	5504.27	1675.39	8001.83	1.19661	0.0107119	0.0948362	3.40747	1.7687	up	C14718	-
mws5038	Isomaltulose	异麦芽酮糖	Others	其它类	Saccharides	糖类	C12H22O11	3	0.7052	58166-27-1 | 15132-06-6	64633.6	184511	146454	249276	277039	305508	1.15587	0.0374196	0.156344	0.475581	-1.07224	down	C01742	-
MW0151913	Diesaconitine	素馨乌头碱	Alkaloids	生物碱	Terpenoid alkaloids	萜类生物碱	C35H49NO12	3	0.7035	16298-90-1	45039.1	43036.4	32243.3	18896.7	16720.8	16007.1	1.39915	0.0244461	0.129324	2.33065	1.22073	up	-	-
MEDN0561	Spaglumic acid	N-乙酰天冬氨酰谷氨酸	Amino acids and derivatives	氨基酸及其衍生物	Amino acids and derivatives	氨基酸及其衍生物	C11H16N2O8	3	0.7028	3106-85-2	578823	423386	624358	117313	123807	126401	1.44933	0.0202034	0.118345	4.42578	2.14593	up	C12270	ko00250,ko01100
MEDN1616	Val-Pro-Leu	缬氨酸-脯氨酸-亮氨酸	Amino acids and derivatives	氨基酸及其衍生物	Amino acids and derivatives	氨基酸及其衍生物	C16H29N3O4	3	0.7003	90614-49-6	112631	118206	189756	84243.9	59266.9	49672.8	1.27054	0.0764328	0.222769	2.17716	1.12245	up	-	-
MEDL01744	Heterophylliin A	1,3-二-O-没食子酰-4,6-(S)-六羟基二苯甲酰基-β-D-葡萄糖; 榛子素 A	Tannins	鞣质	Tannin	鞣质	C34H26O22	3	0.6988	87687-52-3	26615.7	39310.4	89908.6	199407	148935	73907.9	1.08038	0.119234	0.280979	0.369058	-1.43808	down	-	-
MW0119848	4-(2-Hydroxyethyl)piperazin-1-ylethanesulphonic acid	15（R)-氢过氧-EPE	Benzene and substituted derivatives	苯及其衍生物	Benzene and substituted derivatives	苯及其衍生物	C8H18N2O4S	3	0.6986	7365-45-9	1.21434e+06	1.28342e+06	1.03459e+06	3.3728e+06	3.06009e+06	4.26494e+06	1.43587	0.0186879	0.11608	0.330193	-1.59862	down	-	-
MW0110123	N2-Tryptophyllysine	N2-色氨酸赖氨酸	Amino acids and derivatives	氨基酸及其衍生物	Amino acids and derivatives	氨基酸及其衍生物	C17H24N4O3	3	0.6969	51790-14-8	100519	116376	101646	236457	207207	196310	1.43739	0.00547794	0.0752923	0.497739	-1.00654	down	-	-
MW0001861	2-Pyridin-3-yl-2,3-dihydro-1H-perimidine	2-Pyridin-3-yl-2,3-dihydro-1H-perimidine	Benzene and substituted derivatives	苯及其衍生物	Benzene and substituted derivatives	苯及其衍生物	C16H13N3	3	0.6942	6584-41-4	5324.42	4754.58	7871.46	21232.8	20703.1	17889.4	1.4034	0.00060669	0.0361806	0.300048	-1.73673	down	-	-
MEDN1442	8-Hdohe	8-羟基-4Z,6E,10Z,13Z,16Z,19Z-二十二碳六烯酸	Lipids	脂质	Free fatty acids	游离脂肪酸	C22H32O3	3	0.689	90780-54-4	20028.6	1966.61	131.37	16097.9	55906.9	609462	1.08112	0.369845	0.527863	0.0324691	-4.94479	down	-	-
MW0049205	Deltaline	翠雀它灵	Alkaloids	生物碱	Terpenoid alkaloids	萜类生物碱	C27H41NO8	3	0.6887	6836-11-9	91460.2	77558.5	100814	34234.1	34671.1	31918.8	1.44929	0.0130135	0.100753	2.67627	1.42022	up	C08679	-
MEDL02128	Pyridoxal phosphate	吡哆醛-5'-磷酸	Others	其它类	Vitamin	维生素	C8H10NO6P	3	0.6882	54-47-7	18349.2	15328.4	9563.57	35389.9	36970.1	22778.3	1.25497	0.0405122	0.16261	0.454508	-1.13762	down	C00018	ko00730,ko00750,ko01100,ko01240
MW0157031	Ser-Tyr	L-丝氨酰-L-酪氨酸	Amino acids and derivatives	氨基酸及其衍生物	Amino acids and derivatives	氨基酸及其衍生物	C12H16N2O5	3	0.687	21435-27-8	692773	766896	666890	2.62945e+06	2.72172e+06	1.78562e+06	1.42466	0.0293117	0.140648	0.297972	-1.74675	down	-	-
mws0895	Genistin	染料木苷(金雀异黄苷)	Flavonoids	黄酮	Isoflavones	异黄酮	C21H20O10	3	0.6856	529-59-9	1.47684e+06	957398	762639	99059.7	242275	337982	1.3037	0.0476816	0.175311	4.70602	2.23451	up	C09126	ko00943
MW0142469	2-Methylaminoadenosine	2-甲基氨基腺苷	Nucleotides and derivatives	核苷酸及其衍生物	Nucleotides and derivatives	核苷酸及其衍生物	C11H16N6O4	3	0.683	13364-95-9	11167.7	6060.43	5945.76	26898.2	30853.6	8909.92	1.07705	0.158213	0.330421	0.347635	-1.52436	down	C03218	-
MW0049032	Cortisol 21-sulfate	21-硫酸皮质醇	Others	其它类	Lactones	内酯类化合物	C21H30O8S	3	0.679	1253-43-6	72213.7	31282.3	64397.4	139617	101241	129615	1.20609	0.0168032	0.111713	0.453187	-1.14182	down	-	-
MW0146926	Butrin	布特林；丁素7，3′-二-O-葡萄糖苷	Flavonoids	黄酮	Flavones	黄酮	C27H32O15	3	0.6783	492-13-7	1.71799e+06	1.33903e+06	1.32651e+06	3.82281e+06	4.49958e+06	3.65011e+06	1.42976	0.00346512	0.0665633	0.366132	-1.44956	down	C09616	-
MADN0626	1,6-di-O-phosphono-D-fructose	1,6-二-O-膦酰基-D-果糖	Organic acids	有机酸	Organic acids	有机酸	C6H14O12P2	3	0.6781	4937-84-2	166428	149933	176604	42854.2	48818.9	38677.7	1.4551	0.00156805	0.0494223	3.78183	1.91909	up	-	-
MW0151275	Hymenocardine	膜卡定	Benzene and substituted derivatives	苯及其衍生物	Benzene and substituted derivatives	苯及其衍生物	C37H50N6O6	3	0.6753	19771-56-3	2490.66	1928.03	2434.64	9734.46	3399.37	3065.91	1.01254	0.287113	0.457644	0.423052	-1.24109	down	C10004	-
MW0112811	3-Galactosyllactose	3'-半乳糖半乳糖	Others	其它类	Saccharides	糖类	C18H32O16	3	0.6752	32694-82-9	28306	28456.5	30088.4	8080.98	17493.9	7661.09	1.30776	0.027656	0.137533	2.61316	1.3858	up	-	-
MW0149121	Falaconitine	法乌甲素	Benzene and substituted derivatives	苯及其衍生物	Benzene and substituted derivatives	苯及其衍生物	C34H47NO10	3	0.6744	62926-57-2	36800.8	40425.6	29138.6	83705.4	75974.8	67490.3	1.41075	0.00317145	0.0665633	0.468216	-1.09475	down	C08683	-
MW0148692	D-Ribitol-5-phosphate	D-核糖醇-5-磷酸	Organic acids	有机酸	Organic acids	有机酸	C5H13O8P	3	0.6734	35320-17-3 | 3506-18-1 | 51584-96-4	50875.9	48359.8	54402.7	126334	269460	87585.3	1.2199	0.185132	0.360937	0.317842	-1.65362	down	C01068	ko00040,ko00515,ko01100
MW0156343	Rebaudioside B	莱鲍迪甙B	Terpenoids	萜类	Ditepenoids	二萜	C38H60O18	3	0.6708	58543-17-2	444994	419417	426731	117092	129141	133510	1.45937	1.97994e-05	0.0153115	3.40005	1.76556	up	-	-
MW0151663	Ile-Ala	异亮氨酸丙氨酸	Amino acids and derivatives	氨基酸及其衍生物	Amino acids and derivatives	氨基酸及其衍生物	C9H18N2O3	3	0.6707	24787-73-3	177976	249415	144369	27199.7	63796.9	61976.9	1.31853	0.0328652	0.147766	3.73764	1.90213	up	-	-
MEDP1054	Liquorice	甘草酸	Terpenoids	萜类	Triterpene Saponin	三萜皂苷	C42H62O16	3	0.6706	1405-86-3	209154	129473	183610	55382	67556.9	55301.2	1.4104	0.0361615	0.15436	2.92997	1.55088	up	C02284	-
MW0003614	3,4-Dihydro-8-hydroxy-3-(3-hydroxy-4-methoxyphenyl) 1H-2-benzopyran-1-one	3,4-Dihydro-8-hydroxy-3-(3-hydroxy-4-methoxyphenyl) 1H-2-benzopyran-1-one	Phenolic acids	酚酸类	Phenolic acids	酚酸类	C16H14O5	3	0.6698	21499-23-0	91802.9	79429	50552.2	135907	126488	219372	1.24443	0.0830424	0.230493	0.460354	-1.11918	down	-	-
MW0114702	Lacto-N-tetraose	乳糖-N-四糖	Others	其它类	Saccharides	糖类	C26H45NO21	3	0.6673	14116-68-8	134948	573487	35077.5	706383	538727	960874	1.06098	0.0824905	0.230493	0.337044	-1.56899	down	C06371	-
MW0000476	Usambarine	乌桑巴林	Alkaloids	生物碱	Alkaloids	生物碱	C30H34N4	3	0.6662	35226-29-0	11923.3	11271.7	6232.96	21382.3	18638.5	23112.7	1.30396	0.00914965	0.091316	0.466122	-1.10122	down	C09250	-
MW0169534	N-benzyl-1-methyl-1H-pyrazolo[3,4-d]pyrimidin-4-amine	N-苄基-1-甲基-1H-吡唑并[3,4-d]嘧啶-4-胺	Benzene and substituted derivatives	苯及其衍生物	Benzene and substituted derivatives	苯及其衍生物	C13H13N5	3	0.664	105903-56-8	8450.4	3954.42	5533.43	11765.2	14242.8	13650.6	1.27602	0.0153575	0.107479	0.452317	-1.14459	down	-	-
MEDN1331	4-Methoxyphenylacetic acid	4-甲氧基苯乙酸	Organic acids	有机酸	Organic acids	有机酸	C9H10O3	3	0.6628	104-01-8	1.45036e+06	1.28208e+06	1.51703e+06	468931	655580	690959	1.40646	0.00116915	0.0471888	2.3407	1.22694	up	-	-
MW0128015	Epiafzelechin trimethyl ether	依帕西林三甲醚	Benzene and substituted derivatives	苯及其衍生物	Benzene and substituted derivatives	苯及其衍生物	C18H20O5	3	0.6608	3143-21-3	19300.9	23049.5	27075.3	101929	80396.9	77097.1	1.43233	0.0101272	0.0939674	0.267616	-1.90177	down	-	-
MW0139190	(1R,4E,5'S,6S,6'S,7R,8S,10R,11R,12S,14R,15S,16R,18E,20E,22R,25S,27R,28S)-22-ethyl-7,11,14,15-tetrahydroxy-6'-[(2R)-2-hydroxypropyl]-5',6,8,10,12,14,16,28,29-nonamethylspiro[2,26-dioxabicyclo[23.3.1]nonacosa-4,18,20-triene-27,2'-oxane]-3,9,13-trione	(1R,4E,5'S,6S,6'S,7R,8S,10R,11R,12S,14R,15S,16R,18E,20E,22R,25S,27R,28S)-22-ethyl-7,11,14,15-tetrahydroxy-6'-[(2R)-2-hydroxypropyl]-5',6,8,10,12,14,16,28,29-nonamethylspiro[2,26-dioxabicyclo[23.3.1]nonacosa-4,18,20-triene-27,2'-oxane]-3,9,13-trione	Heterocyclic compounds	杂环化合物	Heterocyclic compounds	杂环化合物	C45H74O11	3	0.6606	579-13-5	1671.57	3391.38	2218.7	688.87	615.62	1239.78	1.26329	0.0745156	0.220928	2.86198	1.51701	up	-	-
MW0114539	beta-D-Glucopyranose, 1-thio-, 1-(4-(methylsulfinyl)-N-(sulfooxy)butanimidate)	3-甲基亚磺酰丙基硫苷	Others	其它类	Glucosinolates	硫苷类	C11H21NO10S3	3	0.6602	554-88-1	92318.8	121378	81099.2	51925.8	38994.7	34514.7	1.34547	0.0277141	0.137533	2.35018	1.23277	up	C08411	-
MEDL01843	Matairesinol	罗汉松树脂醇	Lignans and Coumarins	木脂素和香豆素	Lignans	木脂素	C20H22O6	3	0.6561	580-72-3	387582	385117	398410	153340	268415	151941	1.31509	0.034319	0.151443	2.04134	1.02952	up	C10682	ko00999,ko01100,ko01110
MW0158859	Uscharidin	牛角瓜素	Steroids	甾体	Cardiac glycoside	强心苷	C29H38O9	3	0.6542	24321-47-9	2.18062e+06	1.77449e+06	1.60499e+06	216332	249960	207162	1.45392	0.0104775	0.0948362	8.2561	3.04546	up	C08883	-
MW0142497	Naphthyl-2-methyl-succinic acid	2-萘基甲基丁二酸；2-甲基-2-萘丁二酸	Benzene and substituted derivatives	苯及其衍生物	Benzene and substituted derivatives	苯及其衍生物	C15H14O4	3	0.6516	350044-88-1	55671.2	50547.2	67287.2	192240	163982	134968	1.41098	0.0169521	0.111733	0.353235	-1.5013	down	C14115	-
MW0144825	Ala-His	L-丙氨酸-L-组氨酸	Amino acids and derivatives	氨基酸及其衍生物	Amino acids and derivatives	氨基酸及其衍生物	C9H14N4O3	3	0.6516	3253-17-6	11946.2	16263.8	16523.2	74971.2	29781.5	24558.6	1.1693	0.2194	0.395155	0.345934	-1.53143	down	-	-
MW0114728	Lex-lactose	Lex-lactose	Others	其它类	Saccharides	糖类	C32H55NO25	3	0.651	213250-53-4	135889	118602	91636.6	320525	280192	322887	1.42647	0.000539442	0.0352537	0.374758	-1.41597	down	-	-
MW0006988	Alphazurine	甲磺脲	Benzene and substituted derivatives	苯及其衍生物	Benzene and substituted derivatives	苯及其衍生物	C37H36N2O9S3	3	0.6484	68921-42-6	7233.44	8881.84	12772.7	38818.6	25566.9	16563.1	1.25117	0.107368	0.265196	0.356868	-1.48654	down	-	-
MW0137498	Benzyl cinnamate	肉桂酸苄酯	Benzene and substituted derivatives	苯及其衍生物	Benzene and substituted derivatives	苯及其衍生物	C16H14O2	3	0.6478	103-41-3 | 8014-16-2 | 78277-23-3	11846.1	10039.4	12962.6	3455.42	3418.6	6188.97	1.35599	0.00446632	0.0717085	2.6677	1.4156	up	-	-
MW0006599	Omega-hydroxyemodin	Ω-羟基大黄素	Benzene and substituted derivatives	苯及其衍生物	Benzene and substituted derivatives	苯及其衍生物	C15H10O6	3	0.6461	481-73-2	20040.2	18618.8	58724.3	142464	126483	49471.7	1.11763	0.107946	0.265196	0.305834	-1.70918	down	C17810	-
MW0133966	5,6,7-Trimethoxycoumarin	5，6，7-三甲氧基香豆素	Lignans and Coumarins	木脂素和香豆素	Coumarins	香豆素	C12H12O5	3	0.6429	55085-47-7	22802.7	16765.3	24378.2	24453.5	68650.7	43422.4	1.04769	0.196155	0.370737	0.468379	-1.09425	down	C09313	-
MEDN0506	N-Acetylglucosamine-1-phosphate	N-乙酰-D-葡萄糖胺-1-磷酸	Others	其它类	Saccharides	糖类	C8H16NO9P	3	0.6421	6866-69-9	37146.9	31721.3	43639.4	19949.9	15739	17924.5	1.40301	0.02	0.117808	2.0985	1.06936	up	C04256	-
MW0139627	Safflor yellow A	红花黄色素 A	Quinones	醌类	Quinones	醌类	C27H30O15	3	0.6418	85532-77-0	148469	138284	71183.8	19093.1	38158.6	64167.5	1.16953	0.0626598	0.200235	2.94794	1.55971	up	-	-
MW0157166	Spinoside A	刺五加苷A	Terpenoids	萜类	Triterpene	三萜	C39H56O12	3	0.6399	119626-74-3	283673	416414	389121	175260	172608	182100	1.38371	0.0434416	0.168703	2.05523	1.0393	up	C08809	-
MW0007776	Hippuric acid, o-methoxy-, methyl ester	甲基邻甲氧基马尿酸	Benzene and substituted derivatives	苯及其衍生物	Benzene and substituted derivatives	苯及其衍生物	C11H13NO4	3	0.6395	27796-49-2	339850	337981	324867	137444	144227	184603	1.42075	0.00363541	0.0672043	2.15044	1.10463	up	-	-
MW0143301	N-Methyl-4-dimethylallyltryptophan	4-二甲基烯丙基-L-相思子碱；4-(3-甲基-2-丁烯基)-L-相思	Heterocyclic compounds	杂环化合物	Heterocyclic compounds	杂环化合物	C17H22N2O2	3	0.6391	75917-16-7	44534.5	33238.4	43559.1	7179.17	7343.15	7312.76	1.45701	0.0116531	0.0967	5.55675	2.47424	up	C20410	ko00901,ko01100,ko01110
MW0011883	1,2-Dilinoleoyl-SN-glycero-3-phosphocholine	1,2-Dilinoleoyl-sn-glycero-3-phosphocholine	GP	甘油磷脂类	PC	磷脂酰胆碱	C44H80NO8P	3	0.6387	998-06-1	52308.7	58359.9	22286.4	1058.14	4804.31	628.5	1.35059	0.0615059	0.198291	20.4831	4.35636	up	-	-
MW0137038	7-Hydroxy-5-[(3-methylbut-2-en-1-yl)oxy]-2H-1-benzopyran-2-one	7-羟基-5-[（3-甲基-2-烯-1-基）氧]-2H-铬-2-酮	Others	其它类	Ketone compounds	酮类化合物	C14H14O4	3	0.6385	33899-44-4	35443.8	26009.9	64742.6	97044.1	94802.1	80670.7	1.20159	0.0366479	0.155293	0.463077	-1.11068	down	-	-
MW0063232	Cholest-7-en-6-one, 2,3,14,20,22,24,25-heptahydroxy-, (2beta,3beta,5beta,22R)-	Cholest-7-en-6-one, 2,3,14,20,22,24,25-heptahydroxy-, (2beta,3beta,5beta,22R)-	Steroids	甾体	Steroid	甾体	C27H44O8	3	0.6341	31385-31-6	4426.67	6019.48	5767.65	28942.4	18809.9	7105.56	1.14762	0.177216	0.352023	0.29556	-1.75848	down	-	-
MEDN0261	Indole-3-propionic acid	3-吲哚丙酸	Alkaloids	生物碱	Plumerane	吲哚类生物碱	C11H11NO2	3	0.6274	830-96-6	41340.1	47848.9	45082.1	199772	176621	180229	1.45903	0.00149963	0.0494223	0.241225	-2.05155	down	-	-
MW0150605	CID 5476509	货号 5476509	Benzene and substituted derivatives	苯及其衍生物	Benzene and substituted derivatives	苯及其衍生物	C37H44O10	3	0.6257	55306-11-1	114445	123817	95976.1	69070.5	54129.5	33740.6	1.26485	0.0119836	0.0981816	2.12971	1.09066	up	-	-
MW0157308	Suspensaside	悬垂性	Benzene and substituted derivatives	苯及其衍生物	Benzene and substituted derivatives	苯及其衍生物	C29H36O16	3	0.6235	84213-44-5	115218	108614	139857	322622	308299	271188	1.42619	0.00134834	0.0494223	0.403155	-1.3106	down	C10499	-
MW0148386	Docosahexaenoic acid	顺式-4,7,10,13,16,19-二十二碳六烯酸	Lipids	脂质	Free fatty acids	游离脂肪酸	C22H32O2	3	0.6234	6217-54-5	99970	105792	120623	291554	156687	217990	1.28566	0.0974054	0.252775	0.489898	-1.02945	down	C06429	ko01040
MW0144048	8-Epideoxyloganic acid	8-表脱氧马钱子酸	Organic acids	有机酸	Organic acids	有机酸	C16H24O9	3	0.6226	88668-99-9	66092.6	71561	64639.1	151679	136105	155258	1.45449	0.00237255	0.0591861	0.4566	-1.131	down	C11649	-
MW0136673	6-Hydroxy-4-methyl-2-oxo-2H-chromen-7-yl acetate	6-羟基-4-甲基-2-氧代-2H-铬-7-乙酸酯	Others	其它类	Lactones	内酯类化合物	C12H10O5	3	0.6222	46895-13-0	301654	134252	190815	96134.5	124699	89497.4	1.16787	0.159844	0.332851	2.01953	1.01402	up	-	-
MW0151689	Ile-Trp	异亮氨酰-色氨酸	Amino acids and derivatives	氨基酸及其衍生物	Amino acids and derivatives	氨基酸及其衍生物	C17H23N3O3	3	0.6201	13589-06-5	31518.6	49870.2	47033.2	15330.4	17750.2	17487.9	1.38875	0.0428817	0.167561	2.53956	1.34458	up	-	-
MW0118853	Protionamide	丙硫异烟胺	Alcohol and amines	醇、胺类	Amines	胺类	C9H12N2S	3	0.6201	14222-60-7	85156.3	84455.4	77706.4	181126	164208	183033	1.45603	0.00141781	0.0494223	0.468081	-1.09517	down	-	-
MW0011281	(3S,5R,6R,6'S)-6,7-Didehydro-5,6-dihydro-3,5,6'-trihydroxy-13,14,20-trinor-3'-oxo-beta,epsilon-caroten-19',11'-olide 3-acetate	(3S,5R,6R,6'S)-6,7-Didehydro-5,6-dihydro-3,5,6'-trihydroxy-13,14,20-trinor-3'-oxo-beta,epsilon-caroten-19',11'-olide 3-acetate	Others	其它类	Lactones	内酯类化合物	C39H48O7	3	0.6193	256505-50-7	86703.8	83969.6	50306.3	173963	130284	143814	1.30768	0.0124734	0.0991073	0.493192	-1.01978	down	-	-
MW0000423	Rescinnamine	利血胺	Alkaloids	生物碱	Alkaloids	生物碱	C35H42N2O9	3	0.6193	24815-24-5	50540.5	40019.7	70687.4	24724.8	27925.2	18562.2	1.32064	0.068591	0.211982	2.26433	1.17908	up	C06540	-
MW0156618	Cashmiradelphine	七萜碱；卡什米拉德芬	Terpenoids	萜类	Ditepenoids	二萜	C37H52N2O11	3	0.6172	69787-05-9	81753.1	68266.4	75831.5	36759.2	29000.4	22611.9	1.39556	0.0012712	0.0492757	2.5557	1.35372	up	C08668	-
MW0154955	Pedilstatin	派地尔他汀	Terpenoids	萜类	Ditepenoids	二萜	C30H40O7	3	0.6131	70028-76-1	36865.2	48420.2	24344.9	7931.94	18474.1	6223.96	1.24938	0.0456494	0.171509	3.3598	1.74838	up	-	-
MW0054404	Loganin	马钱子苷;马钱素	Terpenoids	萜类	Monoterpenoids	倍萜	C17H26O10	3	0.6114	18524-94-2	9036.92	6465.72	10479.5	27233.2	21271.3	12061.2	1.19246	0.112227	0.271539	0.428991	-1.22098	down	C01433	ko00902,ko01100,ko01110
MW0169507	N-1-Naphthylbenzamide	N-(萘-1-基）苯甲酰胺	Benzene and substituted derivatives	苯及其衍生物	Benzene and substituted derivatives	苯及其衍生物	C17H13NO	3	0.6113	634-42-4	902.62	4829.3	6261.32	25628.9	22946	19643.7	1.24566	0.00139191	0.0494223	0.175806	-2.50794	down	-	-
MW0157955	Tomentosin	托曼托辛	Terpenoids	萜类	Sesquiterpenoids	倍半萜	C15H20O3	3	0.6035	33649-15-9	55809.9	54869.5	53789.1	13771.4	14941.4	12712.7	1.45887	1.33741e-06	0.00508092	3.97022	1.98922	up	C09562	-
MW0007500	Levosimendan	左西孟旦	Benzene and substituted derivatives	苯及其衍生物	Benzene and substituted derivatives	苯及其衍生物	C14H12N6O	3	0.5982	141505-33-1	601148	553446	328242	186324	220842	198791	1.31896	0.0718223	0.216387	2.4471	1.29107	up	-	-
MW0129464	Angoletin	1-(2，4-二羟基-6-甲氧基-3，5-二甲基苯基)-3-苯基丙酮	Others	其它类	Ketone compounds	酮类化合物	C18H20O4	3	0.5977	76444-55-8	439243	375256	451769	258995	149500	133583	1.31843	0.0107424	0.0948362	2.33595	1.22401	up	-	-
MW0149874	Glutaminyl-arginine	谷氨酰胺酰-精氨酸	Amino acids and derivatives	氨基酸及其衍生物	Amino acids and derivatives	氨基酸及其衍生物	C11H22N6O4	3	0.5976	126590-89-4	487449	508735	481845	268697	244172	220664	1.43885	0.000381423	0.0312693	2.01494	1.01074	up	-	-
MEDN1054	tetranor-12(R)-HETE	8-羟基-4,6,10-十六碳三烯酸	Lipids	脂质	Free fatty acids	游离脂肪酸	C16H26O3	3	0.5925	135271-51-1	76641.7	89010.6	68476.2	45944.4	35687.5	35428.8	1.37662	0.00910522	0.091316	2.00006	1.00004	up	-	-
MW0115112	Perseitol	鳄梨醇	Alcohol and amines	醇、胺类	Alcohols	醇类	C7H16O7	3	0.5877	527-06-0	190867	131989	181449	77663	102562	71144.1	1.34281	0.0260605	0.133863	2.00623	1.00449	up	C08255	-
MW0169536	N-[(3S)-2-oxothiolan-3-yl]butanamide	N-[(3S)-2-oxothiolan-3-yl]丁酰胺	Amino acids and derivatives	氨基酸及其衍生物	Amino acids and derivatives	氨基酸及其衍生物	C8H13NO2S	3	0.5857	202284-85-3	217397	165030	183553	512043	439923	316475	1.35085	0.0465408	0.173453	0.446201	-1.16423	down	-	-
MW0105592	alpha-Amanitine	鹅膏毒素	Heterocyclic compounds	杂环化合物	Heterocyclic compounds	杂环化合物	C39H54N10O14S	3	0.5821	23109-05-9	128327	63233.8	41393.8	17776.1	25283	41276.5	1.10568	0.192317	0.366141	2.76224	1.46584	up	C08438	-
MADN0593	L-Methionylglycine	L-甲硫酰甘氨酸	Amino acids and derivatives	氨基酸及其衍生物	Amino acids and derivatives	氨基酸及其衍生物	C7H14N2O3S	3	0.5764	14486-03-4	29894.5	28394	18430.5	110107	52701.8	49337.1	1.25956	0.145196	0.314817	0.361633	-1.4674	down	-	-
MW0003099	2-Hydroxy-3-iodo-5-nitrobenzaldehyde	2-羟基-3-碘-5-硝基苯甲醛	Benzene and substituted derivatives	苯及其衍生物	Benzene and substituted derivatives	苯及其衍生物	C7H4INO4	3	0.5726	70331-81-6	3747.53	1376.61	1602.92	327.04	262.38	1852.95	1.00583	0.203227	0.378445	2.75432	1.46169	up	-	-
MW0152632	H-Leu-val-OH	亮氨酰-缬氨酸	Amino acids and derivatives	氨基酸及其衍生物	Amino acids and derivatives	氨基酸及其衍生物	C11H22N2O3	3	0.5708	13588-95-9	20080.5	30950	33430.5	18030.5	10395.5	10676.3	1.24351	0.044918	0.170563	2.16	1.11103	up	-	-
MW0010023	Usnic acid	松萝酸	Phenolic acids	酚酸类	Phenolic acids	酚酸类	C18H16O7	3	0.5685	125-46-2	109117	103336	73960.4	275660	210438	210574	1.39711	0.01165	0.0967	0.411117	-1.28238	down	-	-
MW0144821	Z-Ala-asp-OH	Z-Ala-asp-OH	Amino acids and derivatives	氨基酸及其衍生物	Amino acids and derivatives	氨基酸及其衍生物	C15H18N2O7	3	0.5415	79458-93-8	8400.49	12271.2	6202.53	28350.5	20150.4	20316.5	1.34194	0.0170837	0.111808	0.390515	-1.35655	down	-	-
MW0119288	3-[(4-methylpiperidin-1-yl)methyl]-1H-indole	3-[(4-甲基哌啶-1-基)甲基]-1H-吲哚	Alkaloids	生物碱	Plumerane	吲哚类生物碱	C15H20N2	3	0.5402	21000-95-3	16766.6	12824.4	20516.4	5572	4943.71	5117.91	1.42881	0.034576	0.151443	3.20511	1.68037	up	-	-
ZINC85504886	Ephedradine B	麻黄碱B	Heterocyclic compounds	杂环化合物	Heterocyclic compounds	杂环化合物	C29H38N4O5	3	0.5375	71327-57-6	1564.93	4560.09	3523.93	561.06	2117.47	1159.63	1.02229	0.14502	0.314729	2.51395	1.32996	up	-	-
FDATN01412	DL-Glutamine	DL-谷氨酰胺	Amino acids and derivatives	氨基酸及其衍生物	Amino acids and derivatives	氨基酸及其衍生物	C5H10N2O3	3	0.5369	6899-04-3 | 585-21-7 | 159663-16-8	1240.88	6448.14	3659.67	11346	9814.1	11680.9	1.16675	0.029013	0.140103	0.345564	-1.53297	down	C00303	-
MW0159280	Val-Ile	缬氨酸-异亮氨酸	Amino acids and derivatives	氨基酸及其衍生物	Amino acids and derivatives	氨基酸及其衍生物	C11H22N2O3	3	0.5146	20556-14-3	150579	305995	249180	772852	614038	804728	1.36792	0.00330577	0.0665633	0.322025	-1.63476	down	-	-
MW0158510	Tyr-Ile-Val-Glu	酪氨酸-异亮氨酸-缬氨酸-谷氨酸	Amino acids and derivatives	氨基酸及其衍生物	Amino acids and derivatives	氨基酸及其衍生物	C25H38N4O8	2	0.9479	-	4.45119e+06	3.54998e+06	3.81405e+06	608153	637177	663257	1.45849	0.00635015	0.080398	6.19056	2.63007	up	-	-
MW0156803	Ser-Ile-Phe-Glu	Ser-Ile-Phe-Glu	Amino acids and derivatives	氨基酸及其衍生物	Amino acids and derivatives	氨基酸及其衍生物	C23H34N4O8	2	0.933	-	2.94549e+06	2.97712e+06	3.10205e+06	854150	870013	814059	1.46193	0.000128422	0.0273488	3.5555	1.83005	up	-	-
MW0152326	Leu-Glu-Phe-Glu	Leu-Glu-Phe-Glu	Amino acids and derivatives	氨基酸及其衍生物	Amino acids and derivatives	氨基酸及其衍生物	C25H36N4O9	2	0.9306	-	104720	93664	98506.7	36852.2	34056.7	54367.7	1.38566	0.00425852	0.0709222	2.36988	1.24481	up	-	-
MW0012811	1-Hexadecanoyl-2-(9Z-octadecenoyl)-sn-glycero-3-phospho-(1'-myo-inositol)	1-十六烷基-2-（9Z十八烷基）-sn-甘油-3-磷酸-（1'-肌醇）	GP	甘油磷脂类	PI	磷脂酰肌醇	C43H81O13P	2	0.9259	-	64321.7	122020	184817	30213.1	54931.7	57870.3	1.14569	0.153702	0.326845	2.59524	1.37587	up	-	-
MW0138744	Laricitrin 3-galactoside	Laricitrin 3-半乳糖苷	Flavonoids	黄酮	Flavones	黄酮	C22H22O13	2	0.9203	-	32466.3	41083.2	24800.9	1818.68	4950.71	25536.4	1.05933	0.0781739	0.224599	3.04435	1.60614	up	-	-
MW0138745	Laricitrin 3-glucoside	Laricitrin 3-葡萄糖苷	Flavonoids	黄酮	Flavones	黄酮	C22H22O13	2	0.9161	-	651625	565655	233733	50888.3	99036.2	316420	1.05657	0.107826	0.265196	3.11147	1.63759	up	-	-
MW0006507	Carmine	胭脂红	Benzene and substituted derivatives	苯及其衍生物	Benzene and substituted derivatives	苯及其衍生物	C22H20O13	2	0.9136	-	924224	645349	814932	416989	345717	393599	1.39178	0.0305321	0.143974	2.06218	1.04417	up	-	-
MW0158456	Tyr-Glu-Gln-Asp	酪氨酸-谷氨酸-谷氨酸-天冬氨酸	Amino acids and derivatives	氨基酸及其衍生物	Amino acids and derivatives	氨基酸及其衍生物	C23H31N5O11	2	0.9055	-	14656.9	11675.6	18025.6	3269.49	4442.01	5275.45	1.4088	0.0213177	0.121419	3.41559	1.77214	up	-	-
MW0144635	Ala-Leu-Gly-Ile-Ser	Ala-Leu-Gly-Ile-Ser	Amino acids and derivatives	氨基酸及其衍生物	Amino acids and derivatives	氨基酸及其衍生物	C20H37N5O7	2	0.9006	-	47066.1	35054.6	64648.5	21046.2	15152.7	15188.4	1.36693	0.0594673	0.195002	2.85614	1.51406	up	-	-
MW0149599	GlcNAc1-3Gal1-4GlcSp	GlcNAc1-3Gal1-4GlcSp	Others	其它类	Saccharides	糖类	C22H38N4O16	2	0.8866	-	83542.7	109937	142130	704709	511886	250114	1.3119	0.101139	0.257284	0.228818	-2.12773	down	-	-
MW0146099	Asp-Glu-His-Glu	Asp-Glu-His-Glu	Amino acids and derivatives	氨基酸及其衍生物	Amino acids and derivatives	氨基酸及其衍生物	C20H28N6O11	2	0.8859	-	59841.2	97149.6	71904.6	157834	246501	163746	1.33879	0.0444554	0.16947	0.402927	-1.31141	down	-	-
MW0158364	Tyr-Ala-Thr-Asp	酪氨酸-丙氨酸-苏氨酸-天门冬氨酸	Amino acids and derivatives	氨基酸及其衍生物	Amino acids and derivatives	氨基酸及其衍生物	C20H28N4O9	2	0.8798	-	142880	140307	115948	973114	1.05769e+06	876748	1.45851	0.00318322	0.0665633	0.137275	-2.86486	down	-	-
MW0150445	Gly-Phe-Asn-Thr-Phe	甘氨酸-苯丙氨酸-天门冬酰胺-苏氨酸-苯丙氨酸	Amino acids and derivatives	氨基酸及其衍生物	Amino acids and derivatives	氨基酸及其衍生物	C28H36N6O8	2	0.8735	-	46862.3	48004.6	74195.4	22630.2	15381	6757.63	1.2899	0.0259908	0.1337	3.77634	1.91699	up	-	-
MW0150223	Glu-Val-Tyr-Asp	谷氨酸-缬氨酸-酪氨酸-天冬酰胺	Amino acids and derivatives	氨基酸及其衍生物	Amino acids and derivatives	氨基酸及其衍生物	C23H32N4O10	2	0.8503	-	9416.06	11813	18132.8	109683	114265	36016	1.31594	0.0996521	0.255624	0.151413	-2.72344	down	-	-
MW0150895	His-Gln-Asn-Glu	组氨酸-谷酰胺-天门冬酰氨-谷氨酸	Amino acids and derivatives	氨基酸及其衍生物	Amino acids and derivatives	氨基酸及其衍生物	C20H30N8O9	2	0.8369	-	35945.3	148184	42247.7	217162	221086	192963	1.20221	0.058583	0.19347	0.358639	-1.47939	down	-	-
MW0158707	TyrMe-Met-OH	TyrMe-Met-OH	Amino acids and derivatives	氨基酸及其衍生物	Amino acids and derivatives	氨基酸及其衍生物	C21H24N2O7S	2	0.8161	-	97688.5	95818.6	126864	54322.3	41536	35045.7	1.38668	0.0105065	0.0948362	2.44737	1.29123	up	-	-
MW0157692	Thr-Ile-Ser-Glu	Thr-Ile-Ser-Glu	Amino acids and derivatives	氨基酸及其衍生物	Amino acids and derivatives	氨基酸及其衍生物	C18H32N4O9	2	0.8132	-	98238.1	91639.9	101740	22517.5	19734.1	30191.8	1.43835	7.22797e-05	0.0239556	4.02546	2.00915	up	-	-
MW0159302	Val-TyrMe-OH	Val-TyrMe-OH	Amino acids and derivatives	氨基酸及其衍生物	Amino acids and derivatives	氨基酸及其衍生物	C20H22N2O7	2	0.8114	-	29829.5	37474.7	49052.7	14094.6	26525.7	8271.78	1.1745	0.0442674	0.16947	2.37987	1.25088	up	-	-
MW0151588	Ile-Ser-Val-Asp	Ile-Ser-Val-Asp	Amino acids and derivatives	氨基酸及其衍生物	Amino acids and derivatives	氨基酸及其衍生物	C18H32N4O8	2	0.8029	-	271661	321369	281828	53682.6	84907.7	54450	1.43285	0.000498115	0.0341033	4.532	2.18015	up	-	-
MW0158703	TyrMe-HoPhe-OH	TyrMe-HoPhe-OH	Amino acids and derivatives	氨基酸及其衍生物	Amino acids and derivatives	氨基酸及其衍生物	C26H26N2O7	2	0.793	-	137948	143278	175129	37740.3	48456.7	18306.6	1.36792	0.00172714	0.0510869	4.36688	2.1266	up	-	-
MW0149408	GalNAc(1-3)[Fuc(1-2)]Gal(1-4)GlcSp	GalNAc(1-3)[Fuc(1-2)]Gal(1-4)GlcSp	Others	其它类	Saccharides	糖类	C28H48N4O20	2	0.7842	-	131629	63090.4	140379	247917	265795	194515	1.18556	0.0192461	0.11637	0.473152	-1.07963	down	-	-
MW0158621	Tyr-Thr-Gln-Arg	酪氨酸-苏氨酸-谷氨酰胺-精氨酸	Amino acids and derivatives	氨基酸及其衍生物	Amino acids and derivatives	氨基酸及其衍生物	C24H38N8O8	2	0.7801	-	8714.47	4571.08	9309.05	655.43	6225.74	1991.17	1.01435	0.112244	0.271539	2.54663	1.34859	up	-	-
MW0130100	Gallocatechol	2-(3,4,5-三羟基苯基)-3,4-二氢-2H-1-苯并吡喃-3,5,7-三醇	Benzene and substituted derivatives	苯及其衍生物	Benzene and substituted derivatives	苯及其衍生物	C15H14O7	2	0.7792	-	530453	542018	152791	3754.62	34216.6	238689	1.00457	0.115993	0.276433	4.42877	2.14691	up	-	-
MW0146169	Asp-Leu-Glu-Asp	Asp-Leu-Glu-Asp	Amino acids and derivatives	氨基酸及其衍生物	Amino acids and derivatives	氨基酸及其衍生物	C19H30N4O11	2	0.7687	-	853301	846128	745850	2.39826e+06	2.07869e+06	2.30806e+06	1.45638	0.00176646	0.0515007	0.360394	-1.47235	down	-	-
MW0144206	Abu-Leu-OH	Abu-Leu-OH	Amino acids and derivatives	氨基酸及其衍生物	Amino acids and derivatives	氨基酸及其衍生物	C15H20N2O6	2	0.7678	-	264894	207142	275203	88358.1	94371.6	84782.6	1.44501	0.0157904	0.108336	2.79329	1.48196	up	-	-
MW0149411	GalNAc1-3Gal1-4LacSp	GalNAc1-3Gal1-4LacSp	Others	其它类	Saccharides	糖类	C28H48N4O21	2	0.7666	-	78350.1	36684.5	80188.6	23930	23477.9	28901.6	1.27117	0.105902	0.262493	2.55831	1.35519	up	-	-
MW0158447	Tyr-Gln-Val-Arg	酪氨酸-谷氨酰胺-缬氨酸-精氨酸	Amino acids and derivatives	氨基酸及其衍生物	Amino acids and derivatives	氨基酸及其衍生物	C25H40N8O7	2	0.7657	-	157869	160283	140294	78776.5	52387.7	67220.2	1.39298	0.00109966	0.0455573	2.3109	1.20846	up	-	-
MW0138534	Dactilin	异鼠李素-3-葡萄糖苷-4-葡萄糖苷	Flavonoids	黄酮	Flavones	黄酮	C28H32O17	2	0.7636	-	35384.1	37228.2	12199.4	7540.74	2803.86	10287.9	1.14941	0.108577	0.265716	4.11059	2.03935	up	-	-
MW0002109	2,3,4-Trihydroxy-4'-ethoxybenzophenone	2,3,4-三羟基-4'-乙氧基苯甲酮	Benzene and substituted derivatives	苯及其衍生物	Benzene and substituted derivatives	苯及其衍生物	C15H14O5	2	0.7593	-	13901.9	15048.6	8318.48	27055.6	34089.7	19163.2	1.24049	0.0607951	0.197403	0.464073	-1.10758	down	-	-
MW0158701	TyrMe-Gly-OH	TyrMe-Gly-OH	Amino acids and derivatives	氨基酸及其衍生物	Amino acids and derivatives	氨基酸及其衍生物	C18H18N2O7	2	0.7586	-	63813	58337.2	83108.4	148111	149519	150912	1.40107	0.0079112	0.0878181	0.457612	-1.1278	down	-	-
MW0150151	Glu-Ser-Tyr-Asp	谷氨酸-丝氨酸-酪氨酸-天门冬氨酸	Amino acids and derivatives	氨基酸及其衍生物	Amino acids and derivatives	氨基酸及其衍生物	C21H28N4O11	2	0.7525	-	104869	102556	42032.6	8353.6	10148.8	34932.6	1.21734	0.0700976	0.213524	4.66841	2.22293	up	-	-
MW0123675	Dihydrogambogic acid	二氢氨基乙酸	Organic acids	有机酸	Organic acids	有机酸	C38H46O8	2	0.7488	-	13068.3	7353.06	1733.75	34513.8	24549.3	12660	1.07388	0.102807	0.259041	0.308898	-1.6948	down	-	-
MW0144642	Ala-Leu-Phe-Glu	Ala-Leu-Phe-Glu	Amino acids and derivatives	氨基酸及其衍生物	Amino acids and derivatives	氨基酸及其衍生物	C23H34N4O7	2	0.746	-	304505	304983	330306	83882.3	109432	35278.7	1.33616	0.00367547	0.0674307	4.11122	2.03957	up	-	-
MW0146334	Aspartylasparagine	Asp Asn	Amino acids and derivatives	氨基酸及其衍生物	Amino acids and derivatives	氨基酸及其衍生物	C8H13N3O6	2	0.7456	-	469155	419084	292716	125023	147504	269536	1.20562	0.0380107	0.157192	2.17863	1.12342	up	-	-
MW0155341	Phe-Ser-Tyr-Asp	Phe-Ser-Tyr-Asp	Amino acids and derivatives	氨基酸及其衍生物	Amino acids and derivatives	氨基酸及其衍生物	C25H30N4O9	2	0.7413	-	43805.8	96417.4	35461.8	241861	207311	162137	1.33018	0.00910878	0.091316	0.287391	-1.79891	down	-	-
MW0155072	Phe-Ala-Asn-Lys	Phe-Ala-Asn-Lys	Amino acids and derivatives	氨基酸及其衍生物	Amino acids and derivatives	氨基酸及其衍生物	C22H34N6O6	2	0.7387	-	791110	476258	595496	71855.1	85201.1	76471.4	1.44879	0.0272036	0.136903	7.97706	2.99586	up	-	-
MW0158678	Tyr-Abu-OH	Tyr-Abu-OH	Amino acids and derivatives	氨基酸及其衍生物	Amino acids and derivatives	氨基酸及其衍生物	C19H20N2O7	2	0.7184	-	362900	449606	314574	1.1646e+06	1.15822e+06	958697	1.43359	0.00204208	0.0554107	0.343463	-1.54177	down	-	-
MW0137869	Daphnoretin	西瑞香素	Lignans and Coumarins	木脂素和香豆素	Coumarins	香豆素	C19H12O7	2	0.712	-	23661.7	22716.4	19839.4	49619.6	49814.8	50025.2	1.45407	0.00155732	0.0494223	0.443046	-1.17447	down	C09216	-
MW0123498	Deacetoxy(7)-7-oxokhivorinic acid	Deacetoxy(7)-7-oxokhivorinic acid	Organic acids	有机酸	Organic acids	有机酸	C27H36O10	2	0.7069	-	248600	234005	317362	152688	95461.9	82050	1.33282	0.0102702	0.0945509	2.42267	1.2766	up	-	-
MW0146074	Asp-Gln-Ala-Asp	Asp-Gln-Ala-Asp	Amino acids and derivatives	氨基酸及其衍生物	Amino acids and derivatives	氨基酸及其衍生物	C16H25N5O10	2	0.7055	-	36819.5	32647.7	25389.6	126104	126817	94860.2	1.4315	0.009796	0.0935655	0.272749	-1.87436	down	-	-
MW0144612	Ala-Ile-Cys-Glu	Ala-Ile-Cys-Glu	Amino acids and derivatives	氨基酸及其衍生物	Amino acids and derivatives	氨基酸及其衍生物	C17H30N4O7S	2	0.7034	-	23446	18907.7	12087.2	92388.9	49575.2	82070.5	1.37669	0.0411485	0.163346	0.243003	-2.04096	down	-	-
MW0110412	Val-Met	缬氨酰蛋氨酸	Amino acids and derivatives	氨基酸及其衍生物	Amino acids and derivatives	氨基酸及其衍生物	C10H20N2O3S	2	0.7033	-	11914	5790.11	8462.54	4779.55	4003.79	2295.89	1.20237	0.0891883	0.240461	2.36178	1.23987	up	-	-
MW0158912	Val-Asn-Asp-Lys	Val-Asn-Asp-Lys	Amino acids and derivatives	氨基酸及其衍生物	Amino acids and derivatives	氨基酸及其衍生物	C19H34N6O8	3	0.9902	-	57318.2	53014.7	46993.5	3042.42	4448.68	860.84	1.39396	0.00152971	0.0494223	18.8371	4.23551	up	-	-
MW0156704	Ser-Gln-Asp-Val-Ser	Ser-Gln-Asp-Val-Ser	Amino acids and derivatives	氨基酸及其衍生物	Amino acids and derivatives	氨基酸及其衍生物	C20H34N6O11	3	0.9797	-	32210.7	33985.8	40112.1	74925.1	74527.8	73498.6	1.43359	0.00298039	0.0664856	0.476824	-1.06847	down	-	-
MW0168178	3-Hydroxy-9,10-secoandrosta-1,3,5(10)-triene-9,17-dione	3-Hydroxy-9,10-secoandrosta-1,3,5(10)-triene-9,17-dione	Phenolic acids	酚酸类	Phenolic acids	酚酸类	C19H24O3	3	0.9671	-	11328.6	33830	20423.8	163156	123142	74593.1	1.34193	0.0537961	0.185955	0.181723	-2.46019	down	C19944	ko01100
ZINC85854311	7''-Deoxybonaspectin D 4''-methyl ether	（2R，3R，4R，5S)-2-[3，5-二甲氧基-4-[（2S)-1-(3，4，5-三甲氧基苯基）丙-2-基]苯氧基]-3，4-二甲基-5-(3，4，5-三甲氧基苯基）氧杂环戊烷	Lignans and Coumarins	木脂素和香豆素	Lignans	木脂素	C35H46O10	3	0.958	-	86882.9	93421.7	67151.6	269796	182696	236788	1.4129	0.0207287	0.11948	0.359007	-1.47792	down	-	-
MEDL00494	9-[(3S,4S,5R)-3,4-dihydroxy-5-(hydroxymethyl)oxolan-2-yl]-1H-purin-6-one	阿拉伯糖基次黄嘌呤	Nucleotides and derivatives	核苷酸及其衍生物	Nucleotides and derivatives	核苷酸及其衍生物	C10H12N4O5	3	0.95	-	34528	45143.7	34243	6801.18	12157	20029.7	1.27335	0.00906247	0.091316	2.9218	1.54686	up	-	-
MW0025497	CL(8:0/8:0/10:0/10:0)	CL(8:0/8:0/10:0/10:0)	GL	甘油脂类	CL	双磷酸甘油酯	C45H86O17P2	3	0.9283	-	19760.4	22121.2	14716.6	7908.7	7293.46	9813.65	1.35721	0.0296738	0.141188	2.2625	1.17792	up	-	-
pmn001517	3,4,5-Trimethoxyphenyl-1-O-Glucoside	3,4,5-三甲氧基苯基-1-O-葡萄糖苷	Phenolic acids	酚酸类	Phenolic acids	酚酸类	C15H22O8	3	0.9162	-	8892.58	5483.85	8917.01	21351.8	20379.4	11275.4	1.21476	0.0774743	0.224141	0.439444	-1.18625	down	-	-
MW0130001	2-(2,4-dihydroxyphenyl)-3-(3,7-dimethylocta-2,6-dien-1-yl)-5,7-dihydroxy-6-(4-hydroxy-3-methylbut-2-en-1-yl)-4H-chromen-4-one	2-(2，4-二羟基苯基)-5，7-二羟基-3-(4-羟基-3，7-二甲基辛-2，6-二烯-1-基)-6-(3-甲基丁-2-烯-1-基)-4H-苯并吡喃-4-酮	Others	其它类	Others	其它	C30H34O7	3	0.8924	-	34217.2	37986.3	40372.5	130199	113518	83294.4	1.41142	0.0331009	0.148538	0.344257	-1.53844	down	-	-
MW0131213	3-(3,7-dimethylocta-2,6-dien-1-yl)-5,7-dihydroxy-6-(3-methylbut-2-en-1-yl)-2-(2,4,5-trihydroxyphenyl)-3,4-dihydro-2H-1-benzopyran-4-one	6-{4-[3-(3，7-二甲基辛-2，6-二烯-1-基)-5，7-二羟基-6-(3-甲基丁-2-烯-1-基)-4-氧代-4H-苯并吡喃-2-基]-3-羟基苯氧基}-3，4，5-三羟基恶烷-2-羧酸	Others	其它类	Others	其它	C30H36O7	3	0.8884	-	629470	686187	530248	125027	141009	502852	1.11785	0.0865928	0.236765	2.40074	1.26348	up	-	-
MW0011825	1-(sn-Glycero-3-phospho)-1D-myo-inositol	1-(sn-甘油-3-磷酸)-1D-肌醇	Others	其它类	Saccharides	糖类	C9H19O11P	3	0.8877	-	2.53714e+06	3.51163e+06	3.25789e+06	6.32781e+06	6.13436e+06	6.25534e+06	1.41043	0.0068813	0.0830155	0.497216	-1.00805	down	C01225	-
MEDL00448	1-Palmitoylglycerol 3-phosphate	溶血卵磷脂酸 16:0	Lipids	脂质	Glycerol ester	甘油酯	C19H39O7P	3	0.883	-	126038	130099	77247.4	57588.7	13467.3	53511.7	1.07764	0.0359702	0.154111	2.67633	1.42026	up	C04036	-
MW0137174	Dioonflavone	地黄酮	Others	其它类	Ketone compounds	酮类化合物	C36H30O10	3	0.88	-	143083	144328	157583	439502	422859	284917	1.39567	0.0400448	0.161713	0.387869	-1.36636	down	-	-
MW0130249	2-(3-hydroxyphenyl)-8-[3,4,5-trihydroxy-6-(hydroxymethyl)oxan-2-yl]-3,4-dihydro-2H-1-benzopyran-3,5,6,7-tetrol	2-(3-羟基苯基)-8-[3，4，5-三羟基-6-(羟甲基）恶烷-2-基]-3，4-二氢-2H-1-苯并吡喃-3，5，6，7-四醇	Benzene and substituted derivatives	苯及其衍生物	Benzene and substituted derivatives	苯及其衍生物	C21H24O11	3	0.87	-	16923.5	16197.1	4077.69	31904.9	17971.8	33875.8	1.02887	0.0778771	0.224141	0.444146	-1.17089	down	-	-
MW0143832	6-Geranylchrysin	6-香叶基白杨素	Flavonoids	黄酮	Flavones	黄酮	C25H26O4	3	0.8682	-	181768	194848	219906	608060	516785	339874	1.34678	0.0639577	0.202985	0.40726	-1.29598	down	C11574	-
MW0008643	N-[2-(3,4-dimethoxyphenyl)ethyl]-3-(3-hydroxy-4-methoxyphenyl)propanamide	N-[2-(3,4-二甲氧基苯基）乙基]-3-(3-羟基-4-甲氧基苯基）丙二酸	Phenolic acids	酚酸类	Phenolic acids	酚酸类	C20H25NO5	3	0.8506	-	57950.6	58325.1	44335.4	153905	110987	145412	1.41536	0.0156185	0.108003	0.391443	-1.35313	down	-	-
MEDN1284	LPE(18:3/0:0)	LPE(18:3/0:0)	GP	甘油磷脂类	LPE	溶血磷脂酰乙醇胺	C23H42NO7P	3	0.8479	-	306535	282731	207151	56195.4	35977.3	127720	1.27125	0.00943353	0.0929332	3.62185	1.85673	up	-	-
MW0134151	5,7-dihydroxy-3-[3-hydroxy-4-methoxy-5-(3-methylbut-2-en-1-yl)phenyl]-8-(3-methylbut-2-en-1-yl)-4H-chromen-4-one	5，7-二羟基-3-[3-羟基-4-甲氧基-5-(3-甲基丁-2-烯-1-基）苯基]-8-(3-甲基丁-2-烯-1-基)-4H-苯并吡喃-4-酮	Others	其它类	Ketone compounds	酮类化合物	C26H28O6	3	0.8417	-	123542	138602	117012	62010.7	62062	43300	1.39109	0.00139245	0.0494223	2.26534	1.17973	up	-	-
ZINC103576770	[(1S,2S,3R,5S,8R,9R,10R)-2-acetyloxy-1,9,10-trihydroxy-8,12,15,15-tetramethyl-4-methylidene-13-oxo-5-tricyclo[9.3.1.03,8]pentadec-11-enyl] (Z)-3-phenylprop-2-enoate	[（1S，2S，3R，5S，8R，9R，10R)-2-乙酰氧基-1，9，10-三羟基-8，12，15，15-四甲基-4-亚甲基-13-氧代-5-三环[9.3.1.03，8]十五-11-烯基]（Z)-3-苯基丙-2-烯酸酯	Others	其它类	Lactones	内酯类化合物	C31H38O8	3	0.8344	-	97891.1	91462.9	87996.7	279105	244693	241584	1.45562	0.00369125	0.0674307	0.362369	-1.46447	down	-	-
MW0142962	3-Hydroxy-7,8-dimethoxy-6-isopropoxy-2-naphthoate	3-羟基-7,8-二甲氧基-6-异丙氧基-2-萘甲酸; 3-羟基-7,8-二甲氧基-6-异丙氧基-2-萘甲酸	Benzene and substituted derivatives	苯及其衍生物	Benzene and substituted derivatives	苯及其衍生物	C16H18O6	3	0.8343	-	605420	452475	652141	255758	250627	262231	1.41647	0.0346421	0.151443	2.22482	1.15369	up	C21323	ko01100,ko01110
MEDN1221	Mannose 6-phosphate	D-甘露糖-6-磷酸	Others	其它类	Saccharides	糖类	C6H13O9P	3	0.8324	-	88979.3	105249	101784	276821	270384	288535	1.45478	1.64336e-05	0.0152504	0.354193	-1.49739	down	C00275	ko00051,ko00520,ko01100,ko01110,ko01240,ko01250
MW0109130	Phe-Pro-Lys	苯丙氨酰-脯氨酰-赖氨酸	Amino acids and derivatives	氨基酸及其衍生物	Amino acids and derivatives	氨基酸及其衍生物	C20H30N4O4	3	0.8255	-	633281	525736	527713	112380	79167.3	145206	1.42283	0.00139908	0.0494223	5.0088	2.32446	up	-	-
MW0110216	Tyr-Pro-Lys	酪氨酸-脯氨酸-赖氨酸	Amino acids and derivatives	氨基酸及其衍生物	Amino acids and derivatives	氨基酸及其衍生物	C20H30N4O5	3	0.817	-	565752	520673	636545	199585	182440	192198	1.45591	0.00672047	0.0829335	3.00052	1.58521	up	-	-
MW0119085	3-(6,7-dimethoxy-2H-1,3-benzodioxol-5-yl)-2-hydroxypropanal	3-(6，7-二甲氧基-2H-1，3-苯并二恶茂-5-基)-2-羟基丙醛	Benzene and substituted derivatives	苯及其衍生物	Benzene and substituted derivatives	苯及其衍生物	C12H14O6	3	0.8069	-	167949	120613	329039	110229	105103	81586.3	1.0875	0.230633	0.406278	2.08004	1.05661	up	-	-
MEDN1262	LPS(18:2/0:0)	LPS(18:2/0:0)	GP	甘油磷脂类	LPS	溶血磷脂酰丝氨酸	C24H44NO9P	3	0.7987	-	8432.58	2816.86	8330.96	4280.41	149.28	32.07	1.04633	0.10102	0.257284	4.38849	2.13373	up	-	-
MW0135683	6-{[2-(2,4-dihydroxyphenyl)-3-(3,7-dimethylocta-2,6-dien-1-yl)-4-oxo-4H-chromen-7-yl]oxy}-3,4,5-trihydroxyoxane-2-carboxylic acid	6-{[2-(2，4-二羟基苯基)-3-(3，7-二甲基辛-2，6-二烯-1-基)-7-羟基-4-氧代-4H-苯并吡喃-6-基]氧}-3，4，5-三羟基恶烷-2-羧酸	Organic acids	有机酸	Organic acids	有机酸	C31H34O11	3	0.7958	-	24536.2	21236.3	12055.1	70923.1	60646.2	48584	1.3626	0.0101097	0.0939674	0.320991	-1.6394	down	-	-
MW0137135	8,16-Dihydroxy-6-(6-hydroxy-1-benzouran-2-yl)-12-methyl-3,13-dioxapentacyclo[10.7.1.02,10.04,9.014,19]icosa-2(10),4,6,8,14(19),15,17-heptaen-11-one	8,16-二羟基二十碳四烯酸	Lipids	脂质	Free fatty acids	游离脂肪酸	C27H18O7	3	0.7816	-	2.35845e+06	2.76031e+06	2.11187e+06	923190	882953	1.22887e+06	1.39334	0.00630505	0.080398	2.38241	1.25242	up	-	-
MW0134819	6-(2,4-dihydroxyphenyl)-2-(4-{7-[(3,3-dimethyloxiran-2-yl)methyl]-6-hydroxy-1-benzofuran-2-yl}-2,6-dihydroxyphenyl)-4-methylcyclohex-3-ene-1-carboxylic acid	6-(2，4-二羟基苯基)-2-(4-{7-[（3，3-二甲基环氧乙烷-2-基）甲基]-6-羟基-1-苯并呋喃-2-基}-2，6-二羟基苯基)-4-甲基环己-3-烯-1-羧酸	Organic acids	有机酸	Organic acids	有机酸	C33H32O9	3	0.7735	-	64399.9	91136.4	75435.1	25975.2	38524.6	37187.3	1.36165	0.0160804	0.109564	2.27139	1.18358	up	-	-
MW0135146	6,7,8-trihydroxy-3-(4-hydroxyphenyl)-3,4-dihydro-2H-1-benzopyran-4-one	6，7，8-三羟基-3-(4-羟基苯基)-3，4-二氢-2H-1-苯并吡喃-4-酮	Benzene and substituted derivatives	苯及其衍生物	Benzene and substituted derivatives	苯及其衍生物	C15H12O6	3	0.7655	-	848995	760128	1.27249e+06	2.52627e+06	2.50133e+06	1.54452e+06	1.26802	0.0439574	0.16947	0.43846	-1.18948	down	-	-
MW0128084	(3-{3,5,6,7-tetrahydroxy-8-[3,4,5-trihydroxy-6-(hydroxymethyl)oxan-2-yl]-3,4-dihydro-2H-1-benzopyran-2-yl}phenyl)oxidanesulfonic acid	（3-{3，5，6，7-四羟基-8-[3，4，5-三羟基-6-(羟甲基）恶烷-2-基]-3，4-二氢-2H-1-苯并吡喃-2-基}苯基）氧代磺酸	Organic acids	有机酸	Organic acids	有机酸	C21H24O14S	3	0.7653	-	22152.8	21468.5	22026.7	64527.2	66143.8	22770.7	1.05909	0.175362	0.35017	0.427837	-1.22487	down	-	-
MW0113383	6-(5-ethenyl-2-hydroxyphenoxy)-3,4,5-trihydroxyoxane-2-carboxylic acid	6-(5-乙烯基-2-羟基苯氧基)-3，4，5-三羟基恶烷-2-羧酸	Organic acids	有机酸	Organic acids	有机酸	C14H16O8	3	0.7652	-	162387	82204.2	57480.8	162897	162327	343457	1.06763	0.169812	0.344374	0.451743	-1.14643	down	-	-
MW0135340	6-[1-(2H-1,3-benzodioxol-5-yl)-3-(4-hydroxy-1-benzofuran-5-yl)-1,3-dioxopropan-2-yl]-3,4,5-trihydroxyoxane-2-carboxylic acid	6-[1-(2H-1，3-苯并间二氧杂环戊烯-5-基)-3-(4-羟基-1-苯并呋喃-5-基)-1，3-二氧代丙-2-基]-3，4，5-三羟基恶烷-2-羧酸	Organic acids	有机酸	Organic acids	有机酸	C24H20O12	3	0.7489	-	17486.4	18057.6	39517.1	77428.6	98042.2	30877.5	1.0659	0.147296	0.316854	0.363759	-1.45895	down	-	-
Lmdp004892	Kaempferol-3-O-(6''-malonyl)galactoside	山柰酚-3-O-(6''-丙二酰)半乳糖苷	Flavonoids	黄酮	Flavonols	黄酮醇	C24H22O14	3	0.7479	-	2092.46	2632.78	860.53	20.75	294.53	676.33	1.06342	0.086328	0.236303	5.63303	2.49391	up	-	-
MW0141294	11-Methoxy-vinorine	11-甲氧基-长春花碱	Alkaloids	生物碱	Alkaloids	生物碱	C22H24N2O3	3	0.7459	-	76858.3	73715.9	89986.3	220772	163296	114708	1.2669	0.103266	0.259423	0.482301	-1.05199	down	C12073	-
ZINC85492413	Deacetylranaconitine	去乙酰乌头碱	Tryptamines,Cholines,Pigments	色胺、胆碱、色素	Cholines	胆碱类	C30H42N2O8	3	0.7448	-	23417.7	7996.36	25662.2	5280.78	4862.63	1122.06	1.19179	0.103574	0.259761	5.06648	2.34098	up	-	-
MW0129321	[4-[5,7-Dihydroxy-8-(3-methylbut-2-enyl)-4-oxo-2,3-dihydrochromen-3-yl]-2-hydroxy-6-(3-methylbut-2-enyl)phenyl] hydrogen sulate	{4-[5，7-二羟基-8-(3-甲基丁-2-烯-1-基)-4-氧代-3，4-二氢-2H-1-苯并吡喃-3-基]-2-羟基-6-(3-甲基丁-2-烯-1-基）苯基}氧代磺酸	Organic acids	有机酸	Organic acids	有机酸	C25H28O9S	3	0.7414	-	28035	25537.2	28156.4	84173.9	99083.7	70609	1.43427	0.0190286	0.116285	0.321935	-1.63516	down	-	-
MW0129999	2-(2,4-dihydroxyphenyl)-3-(3,7-dimethylocta-2,6-dien-1-yl)-5,7-dihydroxy-6-(3-methylbut-2-en-1-yl)-3,4-dihydro-2H-1-benzopyran-4-one	2-(2，4-二羟基苯基)-3-(3，7-二甲基辛-2，6-二烯-1-基)-5，7-二羟基-6-(4-羟基-3-甲基丁-2-烯-1-基)-3，4-二氢-2H-1-苯并吡喃-4-酮	Others	其它类	Others	其它	C30H36O6	3	0.7405	-	34988.1	44511.4	23656	9363.64	8594.55	9085.59	1.39382	0.0518974	0.182565	3.81439	1.93145	up	-	-
MW0129991	2-(2,4-dihydroxy-5-methoxyphenyl)-5-hydroxy-8,8-dimethyl-4H,8H-pyrano[3,2-g]chromen-4-one	2-(2,4-二羟基-5-甲氧基苯基)-5-羟基-8,8-二甲基-4H，8H-吡喃并[3,2-g] chromen-4-one	Others	其它类	Ketone compounds	酮类化合物	C21H18O7	3	0.7387	-	14709.2	17658	31112.3	99804.6	95463.8	42053.9	1.2682	0.0801667	0.227368	0.267482	-1.90249	down	-	-
MW0140216	(1R,10aS)-1,4,10,10a-tetrahydrophenazine-1-carboxylic acid	（1R，10aS)-1,4,10,10a-四氢吩嗪-1-羧酸酯	Others	其它类	Lactones	内酯类化合物	C13H12N2O2	3	0.7351	-	2145.62	4139.85	3259.08	8306.13	8516.12	7150.53	1.35262	0.00345272	0.0665633	0.398141	-1.32865	down	C21411	ko01100,ko01110
MW0003445	3-(3,4-dimethoxyphenyl)-N-[2-(3,4-dimethoxyphenyl)-2-(sulfooxy)ethyl]prop-2-enimidic acid	6-[6-(2-{[2-(3,4-二甲氧基苯基）乙基]-C-羟基碳酰胺基}乙基-1-烯-1-基)-2,3-二甲氧基苯氧基]-3,4,5-三羟基氧烷-2-羧酸	Organic acids	有机酸	Organic acids	有机酸	C21H25NO9S	3	0.7343	-	183474	214660	213967	486368	472374	292343	1.30666	0.0726398	0.218013	0.489257	-1.03134	down	-	-
MW0011088	NCGC00384520-01_C24H30O14_2H-Pyran-4-acetic acid, 5-carboxy-2-(beta-D-glucopyranosyloxy)-3,4-dihydro-3-(2-hydroxyethylidene)-, alpha-[2-(3,4-dihydroxyphenyl)ethyl] ester, (2S,3Z,4S)-	NCGC00384520-01_C24H30O14_2H-Pyran-4-acetic acid, 5-carboxy-2-(beta-D-glucopyranosyloxy)-3,4-dihydro-3-(2-hydroxyethylidene)-, alpha-[2-(3,4-dihydroxyphenyl)ethyl] ester, (2S,3Z,4S)-	Organic acids	有机酸	Organic acids	有机酸	C24H30O14	3	0.7299	-	14289.3	11162.3	23732.7	9929.92	5510.12	3289	1.1719	0.097095	0.252655	2.6261	1.39292	up	-	-
MEDL02723	Resveratrol-3-O-sulfate	白藜芦醇-3-O-硫酸酯	Others	其它类	Stilbene	茋类	C14H12O6S	3	0.7241	-	22929.7	21601	29823.2	14212.8	13532.7	5824.33	1.19973	0.0215211	0.121419	2.2149	1.14724	up	-	-
MW0132949	3-[5,7-dihydroxy-2-(3-hydroxyphenyl)-4-oxo-3,4-dihydro-2H-1-benzopyran-8-yl]-5,7-dihydroxy-2-phenyl-3,4-dihydro-2H-1-benzopyran-4-one	3-[5，7-二羟基-2-(3-羟基苯基)-4-氧代-3，4-二氢-2H-1-苯并吡喃-8-基]-5，7-二羟基-2-苯基-3，4-二氢-2H-1-苯并吡喃-4-酮	Benzene and substituted derivatives	苯及其衍生物	Benzene and substituted derivatives	苯及其衍生物	C30H22O9	3	0.7227	-	27803.6	21267.9	39417.6	81084	83048.6	44484.8	1.21625	0.069028	0.211982	0.424169	-1.23729	down	-	-
MW0166369	cytosyl-beta-D-glucuronate	胞嘧啶-β-D-葡萄糖醛酸	Organic acids	有机酸	Organic acids	有机酸	C10H12N3O7-	3	0.7212	-	954.73	676.5	7133.04	11283.6	9762.36	6721.05	1.06758	0.0753614	0.221455	0.315636	-1.66367	down	-	-
ZINC85492333	[(1S,2S,3R,4S,7R,9S,10S,11S,12R,15S)-4,9,11,15-tetraacetyloxy-1,12-dihydroxy-10,14,17,17-tetramethyl-6-oxatetracyclo[11.3.1.03,10.04,7]heptadec-13-en-2-yl] benzoate	[(1S,2S,3R,4S,7R,9S,10S,11S,12R,15S)-4,9,11,15-tetraacetyloxy-1,12-dihydroxy-10,14,17,17-tetramethyl-6-oxatetracyclo[11.3.1.03,10.04,7]heptadec-13-en-2-yl] benzoate	Benzene and substituted derivatives	苯及其衍生物	Benzene and substituted derivatives	苯及其衍生物	C35H44O13	3	0.7208	-	133370	165029	59844.6	45973.2	52928.3	50423.8	1.12426	0.154379	0.326887	2.39908	1.26248	up	-	-
MW0105120	3-Oxododecanoic acid	3-氧十二烷酸	Organic acids	有机酸	Organic acids	有机酸	C12H22O3	3	0.7179	-	475253	496799	359889	83404.2	146057	134203	1.396	0.0078361	0.08741	3.66255	1.87285	up	C02367	-
MEDL01986	Pleoside	Pleoside	Phenolic acids	酚酸类	Phenolic acids	酚酸类	C15H20O9	3	0.7167	-	121024	60738.4	102449	237429	145409	228229	1.20993	0.0438078	0.16939	0.465108	-1.10436	down	-	-
MW0128123	[3-(8,8-Dimethyl-2-oxopyrano[2,3-]chromen-3-yl)-2-hydroxy-6-methoxyphenyl] hydrogen sulate	（3-{8,8-二甲基-2-氧代-2H，8H-吡拉诺[2,3-f]铬-3-基]-2-羟基-6-甲氧基苯基）氧化磺酸	Organic acids	有机酸	Organic acids	有机酸	C21H18O9S	3	0.7153	-	42499.6	53604.6	26621.1	9750.09	9351.5	24030.6	1.20032	0.0558789	0.189699	2.84533	1.5086	up	-	-
MW0130617	2-{2,6-dihydroxy-4-[6-hydroxy-7-(3-methylbut-2-en-1-yl)-1-benzofuran-2-yl]phenyl}-6-(2,4-dihydroxyphenyl)-4-methylcyclohex-3-ene-1-carboxylic acid	2-{2，6-二羟基-4-[6-羟基-7-(3-甲基丁-2-烯-1-基)-1-苯并呋喃-2-基]苯基}-6-(2，4-二羟基苯基)-4-甲基环己-3-烯-1-羧酸	Organic acids	有机酸	Organic acids	有机酸	C33H32O8	3	0.7151	-	57535.2	60635.9	90451.8	32548.1	31326.2	21965.6	1.35389	0.0490146	0.177678	2.43037	1.28118	up	-	-
ZINC13373207	Artoindonesianin X	5-[6-羟基-7-(3-甲基-2-丁烯基)-1-苯并呋喃-2-基]-4，6-双（3-甲基-2-丁烯基）苯-1，3-二醇	Benzene and substituted derivatives	苯及其衍生物	Benzene and substituted derivatives	苯及其衍生物	C29H34O4	3	0.7118	-	1117.04	1101.8	1884.64	366.01	1115.78	345.36	1.10719	0.104121	0.259761	2.24584	1.16725	up	-	-
MW0129114	{2-[5,7-dihydroxy-2-(4-hydroxyphenyl)-4-oxo-6-[3,4,5-trihydroxy-6-(hydroxymethyl)oxan-2-yl]-4H-chromen-3-yl]-3,5-dihydroxy-6-(hydroxymethyl)oxan-4-yl}oxidanesulfonic acid	{2-[5，7-二羟基-2-(4-羟基苯基)-4-氧代-6-[3，4，5-三羟基-6-(羟基甲基）恶烷-2-基]-4H-苯并吡喃-3-基]-3，5-二羟基-6-(羟基甲基）恶烷-4-基}氧烷磺酸	Organic acids	有机酸	Organic acids	有机酸	C27H30O18S	3	0.7112	-	9578.17	16932.4	2480.92	120.37	1108.74	3184	1.0344	0.183953	0.359235	6.5694	2.71576	up	-	-
MW0130188	2-(3,4-dihydroxyphenyl)-8-[3,4,5-trihydroxy-6-(hydroxymethyl)oxan-2-yl]-3,4-dihydro-2H-1-benzopyran-3,5,6,7-tetrol	2-(3，4-二羟基苯基)-8-[3，4，5-三羟基-6-(羟甲基）恶烷-2-基]-3，4-二氢-2H-1-苯并吡喃-3，5，6，7-四醇	Benzene and substituted derivatives	苯及其衍生物	Benzene and substituted derivatives	苯及其衍生物	C21H24O12	3	0.7102	-	3400.7	3017.65	3634.49	15690.7	10328.7	3412.11	1.02158	0.210503	0.385667	0.341568	-1.54976	down	-	-
MW0109341	Pro-Tyr-Lys	脯氨酰-酪氨酰-赖氨酸	Amino acids and derivatives	氨基酸及其衍生物	Amino acids and derivatives	氨基酸及其衍生物	C20H30N4O5	3	0.709	-	8.42439e+06	6.87488e+06	7.7294e+06	1.55053e+06	1.40884e+06	1.24196e+06	1.45551	0.00386219	0.0685005	5.48129	2.45452	up	-	-
MW0134672	6-({2,4-dihydroxy-2-[(3-hydroxyphenyl)methyl]-3-oxo-2,3-dihydro-1-benzofuran-6-yl}oxy)-3,4,5-trihydroxyoxane-2-carboxylic acid	6-({2，4-二羟基-2-[（3-羟基苯基）甲基]-3-氧代-2，3-二氢-1-苯并呋喃-6-基}氧基)-3，4，5-三羟基恶烷-2-羧酸	Organic acids	有机酸	Organic acids	有机酸	C21H20O12	3	0.7075	-	19992.6	24175.1	7877.95	1711.18	786.61	3751.12	1.2842	0.0846486	0.233917	8.32875	3.0581	up	-	-
MW0167095	(2Z,4E)-5-(3,8-dihydroxy-1,5-dimethyl-6-oxabicyclo[3.2.1]octan-8-yl)-3-methylpenta-2,4-dienoic acid	(2Z,4E)-5-(3,8-dihydroxy-1,5-dimethyl-6-oxabicyclo[3.2.1]octan-8-yl)-3-methylpenta-2,4-dienoic acid	Organic acids	有机酸	Organic acids	有机酸	C15H22O5	3	0.7067	-	3060.08	876.8	1634.25	12150.7	7913.64	9439.73	1.33873	0.0106341	0.0948362	0.188826	-2.40487	down	-	-
MW0166695	11a-Hydroxytetracycline	11a-Hydroxytetracycline	Others	其它类	Lactones	内酯类化合物	C22H24N2O9	3	0.7055	-	149432	134457	205699	89337.2	98501.3	48188.6	1.22352	0.0388674	0.159034	2.07429	1.05262	up	-	-
MW0139072	N-(4-aminobutyl)-3-[3-methoxy-4-(sulfooxy)phenyl]prop-2-enimidic acid	N-(4-氨基丁基)-3-[4-羟基-3-(磺氧基）苯基]丙烯酰胺酸	Organic acids	有机酸	Organic acids	有机酸	C14H20N2O6S	3	0.7053	-	196712	195543	199855	580119	541783	374422	1.40004	0.0411579	0.163346	0.39571	-1.33749	down	-	-
MW0127836	(2-{[6-({[(2E)-3-(3,4-dihydroxyphenyl)prop-2-enoyl]oxy}methyl)-3,4,5-trihydroxyoxan-2-yl]oxy}-4-hydroxy-2,5-bis(hydroxymethyl)oxolan-3-yl)oxidanesulfonic acid	（2-{[6-({[（2E)-3-(3，4-二羟基苯基）丙-2-烯酰基]氧基}甲基)-3，4，5-三羟基恶烷-2-基]氧基}-4-羟基-2，5-双（羟甲基）氧杂环戊烷-3-基）氧杂磺酸	Organic acids	有机酸	Organic acids	有机酸	C21H28O17S	3	0.6997	-	33547	29316.2	38932.5	9281.16	11104.4	16054.9	1.38921	0.00430416	0.0709222	2.79348	1.48207	up	-	-
MW0129423	{8-[2-(acetyloxy)propan-2-yl]-2-oxo-2H,8H,9H-furo[2,3-h]chromen-9-yl}oxidanesulfonic acid	{8-[2-(乙酰氧基）丙-2-基]-2-氧代-2H，8H，9H-呋喃并[2，3-h]苯并吡喃-9-基}氧烷磺酸	Organic acids	有机酸	Organic acids	有机酸	C16H16O9S	3	0.6962	-	10318.6	4219.1	10290	25850.2	18949.5	10917.2	1.04644	0.124594	0.288049	0.445605	-1.16616	down	-	-
MW0131611	3,4,5-trihydroxy-6-({7-methoxy-4-oxo-6-[3,4,5-trihydroxy-6-(hydroxymethyl)oxan-2-yl]-2-(2,4,5-trihydroxyphenyl)-4H-chromen-5-yl}oxy)oxane-2-carboxylic acid	3，4，5-三羟基-6-({7-甲氧基-4-氧代-6-[3，4，5-三羟基-6-(羟甲基）恶烷-2-基]-2-(2，4，5三羟基苯基)-4H-色烯-5-基}氧基）恶烷-2-羧酸	Organic acids	有机酸	Organic acids	有机酸	C28H30O18	3	0.6957	-	5858	5941.77	4098.68	1119.87	1315.86	3874.64	1.15615	0.0478694	0.175584	2.51942	1.33309	up	-	-
MW0109484	Pyroglutamylmethionine	焦谷氨酰甲硫氨酸	Amino acids and derivatives	氨基酸及其衍生物	Amino acids and derivatives	氨基酸及其衍生物	C10H16N2O4S	3	0.6956	-	20615.9	19932.1	26838.3	7150.68	11853	2558.05	1.20502	0.0126851	0.0999376	3.12528	1.64398	up	-	-
MW0012955	1-Palmitoyl-2-arachidonoyl-sn-glycero-3-phosphoglycerol	1-棕榈酰-2-花生四烯酰-sn-甘油-3-磷酸甘油	GP	甘油磷脂类	PG	磷脂酰甘油	C42H75O10P	3	0.6953	-	3541.53	9632.87	18466.7	1486.37	2307.64	703.62	1.24366	0.170633	0.345398	7.03505	2.81456	up	-	-
MW0106919	Glu-Phe-Lys	谷氨酸-苯丙氨酸-赖氨酸	Amino acids and derivatives	氨基酸及其衍生物	Amino acids and derivatives	氨基酸及其衍生物	C20H30N4O6	3	0.6918	-	95271.1	67683.2	165076	21078.3	10204.5	6149.04	1.36601	0.0757992	0.221903	8.76341	3.13149	up	-	-
MW0129293	{4-[2,3-dioxo-3-(2,4,6-trihydroxyphenyl)propyl]-2-methoxyphenyl}oxidanesulfonic acid	{4-[2，3-二氧代-3-(2，4，6-三羟基苯基）丙基]-2-甲氧基苯基}氧磺酸	Organic acids	有机酸	Organic acids	有机酸	C16H14O10S	3	0.6912	-	48148.1	42734.5	74441	31513.8	23584.9	18715.2	1.2853	0.0747552	0.221171	2.23973	1.16333	up	-	-
MW0130230	2-(3,7-dimethylocta-2,6-dien-1-yl)-4-[(2E)-1-hydroxy-3-(4-hydroxyphenyl)prop-2-en-1-yl]benzene-1,3,5-triol	3-(4-羟基苯基)-1-[2，4，6-三羟基-3-(4-羟基-3，7-二甲基-2，6-二烯-1-基）苯基]-1-丙酮	Others	其它类	Others	其它	C25H30O5	3	0.6906	-	9377.61	18989	13916.3	125195	74326.5	61344.1	1.39605	0.0619338	0.19867	0.162087	-2.62516	down	-	-
MW0110372	Val-Trp-Gln	缬氨酸-色氨酸-谷氨酰胺	Amino acids and derivatives	氨基酸及其衍生物	Amino acids and derivatives	氨基酸及其衍生物	C21H29N5O5	3	0.6905	-	22742.1	28267	20214.3	99595.8	40215.6	75505.8	1.29888	0.105681	0.262223	0.330784	-1.59604	down	-	-
MW0136500	6-{4-[6-(3,4-dihydroxy-6-methyl-5-oxooxan-2-yl)-5,7-dihydroxy-4-oxo-4H-chromen-2-yl]-2-hydroxyphenoxy}-3,4,5-trihydroxyoxane-2-carboxylic acid	6-{4-[6-(3，4-二羟基-6-甲基-5-氧代恶烷-2-基)-5，7-二羟基-4-氧代-4H-苯并吡喃-2-基]-2-羟基苯氧基}-3，4，5-三羟基恶烷-2-羧酸	Organic acids	有机酸	Organic acids	有机酸	C27H26O16	3	0.6875	-	73481.6	253932	52372.7	256803	233673	325904	1.072	0.137145	0.303893	0.465208	-1.10405	down	-	-
ZINC70450914	[(1R)-1-(Hydroxymethyl)-2-(3-methoxy-4-hydroxyphenyl)ethyl]6-O-(alpha-L-rhamnopyranosyl)-beta-D-glucopyranoside	（2S，3R，4R，5R，6R)-2-甲基-6-[[（2R，3S，4S，5R，6R)-3，4，5-三羟基-6-[（2R)-1-羟基-3-(4-羟基-3-甲氧基苯基）丙-2-基]氧基恶烷-2-基]甲氧基]恶烷-3，4，5-三醇	Alcohol and amines	醇、胺类	Alcohols	醇类	C22H34O13	3	0.6873	-	12248	17685.2	17876.5	69913.6	56169.1	91548.8	1.41978	0.0283313	0.138815	0.219682	-2.18651	down	-	-
ZINC95914243	(1R,2R,3R,4R)-1-[(R)-1,5-Dimethyl-1-hydroxy-4-hexenyl]-4-methylcyclohexane-1,2,3,4-tetrol 3-acetate	[（1R，2R，5R，6R)-2，5，6-三羟基-5-[（2R)-2-羟基-6-甲基庚-5-烯-2-基]-2-甲基环己基]乙酸酯	Others	其它类	Lactones	内酯类化合物	C17H30O6	3	0.6871	-	19242.9	21376.5	18021.2	5848.39	6973.32	2476.68	1.33171	0.00146524	0.0494223	3.83312	1.93852	up	-	-
MW0132053	3,4,5-trihydroxy-6-{[3,5,7-trihydroxy-2-(4-methoxyphenyl)-4-oxo-4H-chromen-6-yl]oxy}oxane-2-carboxylic acid	3，4，5-三羟基-6-{[3，5，7-三羟基-2-(4-甲氧基苯基)-4-氧代-4H-苯并吡喃-6-基]氧}氧杂环己烷-2-羧酸	Organic acids	有机酸	Organic acids	有机酸	C22H20O13	3	0.6835	-	44436.7	39528.6	40051.1	2602.98	8096.3	18394.4	1.2274	0.0135135	0.102003	4.26266	2.09175	up	-	-
MW0136202	6-{2-[3-(3,7-dimethylocta-2,6-dien-1-yl)-8-[(3,3-dimethyloxiran-2-yl)methyl]-7-hydroxy-4-oxo-4H-chromen-2-yl]-5-hydroxyphenoxy}-3,4,5-trihydroxyoxane-2-carboxylic acid	6-{[2-(2，4-二羟基苯基)-3-(3，7-二甲基辛-2，6-二烯-1-基)-8-[（3，3-二甲基环氧乙烷-2-基）甲基]-4-氧代-4H-苯并吡喃-7-基]氧基}-3，4，5-三羟基恶烷-2-羧酸	Organic acids	有机酸	Organic acids	有机酸	C36H42O12	3	0.6811	-	86435.8	72589.7	64381.8	24221.2	21058.6	34082.8	1.38822	0.00580823	0.0776663	2.81502	1.49315	up	-	-
MW0152272	Leu-Asp-Val-Lys-His	Leu-Asp-Val-Lys-His	Amino acids and derivatives	氨基酸及其衍生物	Amino acids and derivatives	氨基酸及其衍生物	C27H46N8O8	3	0.6798	-	34260.2	30375.9	19904.2	97466.4	62593.7	108471	1.3669	0.0375728	0.156497	0.314825	-1.66738	down	-	-
MW0148284	Deoxyloganin tetraacetate	四乙酸脱氧马钱素	Others	其它类	Lactones	内酯类化合物	C25H34O13	3	0.6791	-	40489.6	59113.3	31030.3	138236	116478	120462	1.39208	0.00183239	0.0518432	0.348192	-1.52205	down	-	-
MEDN1285	LysoPE(0:0/16:0)	LPE(0:0/16:0)	GP	甘油磷脂类	LPE	溶血磷脂酰乙醇胺	C21H44NO7P	3	0.6757	-	102726	95719.8	123199	32588.2	43090.5	53871.3	1.38702	0.00437824	0.0710316	2.48279	1.31196	up	-	-
MW0129331	{5-[(1E)-3-{[3-(3,4-dihydroxyphenyl)-1-methoxy-1-oxopropan-2-yl]oxy}-3-oxoprop-1-en-1-yl]-2-hydroxyphenyl}oxidanesulfonic acid	{5-[（1E)-3-{[3-(3，4-二羟基苯基)-1-甲氧基-1-氧代丙-2-基]氧基}-3-氧代丙-1-烯-1-基]-2-羟基苯基}氧代磺酸	Organic acids	有机酸	Organic acids	有机酸	C19H18O11S	3	0.6727	-	17412.8	15979.7	49468.7	93842.6	106944	39737	1.09126	0.107968	0.265196	0.344504	-1.53741	down	-	-
MW0154307	Naringenin-7-O--D-Glucuronide	Naringenin-7-O--D-Glucuronide	Flavonoids	黄酮	Flavones	黄酮	C21H20O11	3	0.6706	-	4635.15	5861.69	2826.29	17270.8	14966.6	16430.6	1.40357	0.000627919	0.0362144	0.273755	-1.86904	down	-	-
ZINC85648306	RA-Xxii	（1S，4R，7S，10S，13S，16S)-24-羟基-7-[（1R)-1-羟乙基]-10-[（4-甲氧基苯基）甲基]-4，9，13，15，29-五甲基-22-氧杂-3，6，9，12，15，29-六氮杂四环[14.1 2.2.218，21.123，27]三十一碳-18，20，23，25，27（31）32-六烯-2，5，8，11，	Others	其它类	Ketone compounds	酮类化合物	C41H50N6O10	3	0.6675	-	63687.3	74339.6	66667.5	22911	18453.1	19474.3	1.44586	0.00136843	0.0494223	3.36456	1.75042	up	-	-
MW0151768	Iridodial glucoside tetraacetate	环烯醚萜二苷四乙酸酯	Heterocyclic compounds	杂环化合物	Heterocyclic compounds	杂环化合物	C24H34O11	3	0.6648	-	28119.1	46468.2	32866.6	13518.8	23058.1	14751.7	1.25309	0.0560735	0.189913	2.09346	1.06589	up	-	-
MW0136280	6-{3,5-dihydroxy-4-[3-(3-hydroxy-4,5-dimethoxyphenyl)prop-2-enoyl]phenoxy}-3,4,5-trihydroxyoxane-2-carboxylic acid	6-{2，3-二甲氧基-5-[3-氧代-3-(2，4，6-三羟基苯基）丙-1-烯-1-基]苯氧基}-3，4，5-三羟基恶烷-2-羧酸	Benzene and substituted derivatives	苯及其衍生物	Benzene and substituted derivatives	苯及其衍生物	C23H24O13	3	0.6646	-	106000	95451	108145	24150.5	26462.2	32419.1	1.44973	0.000255056	0.029247	3.72864	1.89865	up	-	-
MW0156747	Ser-Glu-Tyr-Glu	Ser-Glu-Tyr-Glu	Amino acids and derivatives	氨基酸及其衍生物	Amino acids and derivatives	氨基酸及其衍生物	C22H30N4O11	3	0.6641	-	58705.3	36931	47147.7	11399.8	22472.2	18938.5	1.32873	0.0240609	0.129067	2.7037	1.43494	up	-	-
MW0136288	6-{3,5-dihydroxy-4-[3-(4-hydroxy-3,5-dimethoxyphenyl)prop-2-enoyl]phenoxy}-3,4,5-trihydroxyoxane-2-carboxylic acid	6-{2，6-二甲氧基-4-[3-氧代-3-(2，4，6-三羟基苯基）丙-1-烯-1-基]苯氧基}-3，4，5-三羟基恶烷-2-羧酸	Benzene and substituted derivatives	苯及其衍生物	Benzene and substituted derivatives	苯及其衍生物	C23H24O13	3	0.6638	-	12793.1	10140.8	2727.83	28002.4	34199.9	33752.1	1.24683	0.00469078	0.0721689	0.267436	-1.90273	down	-	-
MW0134030	5,7-dihydroxy-2-(2,3,4-trihydroxyphenyl)-4H-chromen-4-one	5，7-二羟基-2-(2，3，4-三羟基苯基)-4H-色烯-4-酮	Others	其它类	Ketone compounds	酮类化合物	C15H10O7	3	0.6624	-	207782	114525	86512.6	26756.6	38771.6	96694.2	1.0736	0.142052	0.310759	2.52012	1.33349	up	-	-
ZINC95910077	cyclo[Gly-Leu-Gly-Phe-Tyr-Pro]	（3S，6S，12S，18S)-6-苄基-3-[（4-羟基苯基）甲基]-12-(2-甲基丙基)-1，4，7，10，13，16-六氮杂二环[16.3.0]二十一烷-2，5，8，11，14，17-己酮	Benzene and substituted derivatives	苯及其衍生物	Benzene and substituted derivatives	苯及其衍生物	C33H42N6O7	3	0.6606	-	7766.87	3508.99	9858.57	2132.23	4226	918.69	1.09096	0.115626	0.275997	2.90431	1.5382	up	-	-
MW0136198	6-{2-[3-(3,7-dimethylocta-2,6-dien-1-yl)-7-hydroxy-4-oxo-4H-chromen-2-yl]-5-hydroxyphenoxy}-3,4,5-trihydroxyoxane-2-carboxylic acid	6-{[2-(2，4-二羟基苯基)-3-(3，7-二甲基辛-2，6-二烯-1-基)-4-氧代-4H-苯并吡喃-7-基]氧}-3，4，5-三羟基恶烷-2-羧酸	Organic acids	有机酸	Organic acids	有机酸	C31H34O11	3	0.6599	-	673013	608098	897064	1.95506e+06	1.63773e+06	1.34605e+06	1.354	0.0193193	0.116418	0.44103	-1.18105	down	-	-
MW0136046	6-{[6-(3,4-dihydroxy-6-methyl-5-oxooxan-2-yl)-7-hydroxy-2-(3-methoxyphenyl)-4-oxo-4H-chromen-5-yl]oxy}-3,4,5-trihydroxyoxane-2-carboxylic acid	6-{[6-(3,4-二羟基-6-甲基-5-氧代恶烷-2-基)-7-羟基-2-(3-甲氧基苯基)-4-氧代-4H-铬-5-基]氧} -3,4,5-三羟基恶烷-2-羧酸	Organic acids	有机酸	Organic acids	有机酸	C28H28O15	3	0.6596	-	22749.6	23010	21569	55969.8	55812.5	43450.1	1.43283	0.018514	0.11562	0.433728	-1.20514	down	-	-
MW0135485	6-[3,5-dihydroxy-2-(3-methylbut-2-en-1-yl)-6-[3-(2,4,5-trihydroxyphenyl)propanoyl]phenoxy]-3,4,5-trihydroxyoxane-2-carboxylic acid	6-[3，5-二羟基-2-(3-甲基丁-2-烯-1-基)-6-[3-(2，4，5-三羟基苯基）丙酰基]苯氧基]-3，4，5-三羟基恶烷-2-羧酸	Organic acids	有机酸	Organic acids	有机酸	C26H30O13	3	0.6525	-	29448.2	21603.6	13721.7	70433.9	50844.7	64977.6	1.35005	0.00640878	0.0806448	0.347766	-1.52381	down	-	-
MW0144518	Ala-Asp-Phe-Asp	Ala-Asp-Phe-Asp	Amino acids and derivatives	氨基酸及其衍生物	Amino acids and derivatives	氨基酸及其衍生物	C20H26N4O9	3	0.6525	-	128603	97522.1	82968.3	350629	284698	165543	1.28166	0.0862627	0.236303	0.385947	-1.37353	down	-	-
MW0136139	6-{2-[(E)-2-(4-{6-[2,4-dihydroxy-3-(3-methylbut-2-en-1-yl)benzoyl]-5-(2,4-dihydroxyphenyl)-3-methylcyclohex-2-en-1-yl}-3,5-dihydroxyphenyl)ethenyl]-5-hydroxyphenoxy}-3,4,5-trihydroxyoxane-2-carboxylic acid	6-{2-[（E)-2-(4-{6-[2，4-二羟基-3-(3-甲基丁-2-烯-1-基）苯甲酰基]-5-(2，4-二羟基苯基)-3-甲基环己-2-烯-1-基}-3，5-二羟基苯基）乙烯基]-5-羟基苯氧基}-3，4，5-三羟基恶烷-2-羧酸	Organic acids	有机酸	Organic acids	有机酸	C45H46O15	3	0.6524	-	498832	395632	641160	200073	231004	267449	1.36381	0.0507882	0.180708	2.19838	1.13644	up	-	-
MW0128777	[4,5-dihydroxy-2-({7-oxo-7H-furo[3,2-g]chromen-9-yl}oxy)oxan-3-yl]oxidanesulfonic acid	[4，5-二羟基-2-({7-氧代-7H-呋喃并[3，2-g]苯并吡喃-9-基}氧基）氧杂环己烷-3-基]氧代磺酸	Organic acids	有机酸	Organic acids	有机酸	C16H14O11S	3	0.6512	-	90113.9	107764	81680.2	21484.7	16463	47130.5	1.29664	0.00682351	0.0830155	3.2859	1.71629	up	-	-
MW0112675	3,4,5-trihydroxy-6-{4-[(1E)-3-oxobut-1-en-1-yl]phenoxy}oxane-2-carboxylic acid	3，4，5-三羟基-6-{4-[（1E)-3-氧代丁-1-烯-1-基]苯氧基}恶烷-2-羧酸	Organic acids	有机酸	Organic acids	有机酸	C16H18O8	3	0.6509	-	22071.9	21316	6524.04	2220.81	3831.85	8556.15	1.0714	0.133314	0.298348	3.41657	1.77255	up	-	-
MW0002530	2-[2,3,4-trihydroxy-6-methoxy-5-(3-methylbut-2-en-1-yl)phenyl]acetic acid	2-[2，3，4-三羟基-6-甲氧基-5-(3-甲基-2-丁烯-1-基）苯基]乙酸	Benzene and substituted derivatives	苯及其衍生物	Benzene and substituted derivatives	苯及其衍生物	C14H18O6	3	0.6475	-	386642	337848	381810	1.31748e+06	1.10277e+06	1.09697e+06	1.44913	0.00615251	0.0795727	0.314538	-1.6687	down	-	-
MW0112630	3,4,5-trihydroxy-6-{[5-(4-hydroxy-3-methoxyphenyl)pentanoyl]oxy}oxane-2-carboxylic acid	3，4，5-三羟基-6-{[5-(4-羟基-3-甲氧基苯基）戊酰基]氧}氧杂环己烷-2-羧酸	Organic acids	有机酸	Organic acids	有机酸	C18H24O10	3	0.6472	-	183572	134114	211099	82612.7	78566.7	52948.2	1.35486	0.0292909	0.140648	2.46948	1.30421	up	-	-
MW0012877	NCGC00169922-02_C36H58O10_beta-D-Glucopyranose, 1-O-[(2alpha,3beta,5xi,9xi,18xi,19alpha)-2,3,19-trihydroxy-28-oxoolean-12-en-28-yl]-	NCGC00169922-02_C36H58O10_beta-D-Glucopyranose, 1-O-[(2alpha,3beta,5xi,9xi,18xi,19alpha)-2,3,19-trihydroxy-28-oxoolean-12-en-28-yl]-	FA	脂肪酰类	Others	其它	C36H58O10	3	0.6471	-	10239.1	33310.8	10492.1	2629.35	5665.75	5309.72	1.17118	0.218644	0.394289	3.97227	1.98996	up	-	-
MW0145343	Arg-Glu-Asp-Arg	Arg-Glu-Asp-Arg	Amino acids and derivatives	氨基酸及其衍生物	Amino acids and derivatives	氨基酸及其衍生物	C21H38N10O9	3	0.6428	-	12365.9	9825.59	8112.47	14020.4	24838.6	34473.2	1.20087	0.130515	0.295698	0.413242	-1.27494	down	-	-
MW0054718	4-(1,3-Butadienyl)-3,5,5-trimethylcyclohex-2-en-1-one	靛蓝胭脂红	Others	其它类	Aldehyde compounds	醛类化合物	C13H18O	3	0.6412	-	61347.1	48138.3	192350	35977	39063.3	38961	1.01593	0.30674	0.475216	2.64765	1.40471	up	-	-
MW0110188	Tyr-Asn-Lys	酪氨酸-天冬酰胺-赖氨酸	Amino acids and derivatives	氨基酸及其衍生物	Amino acids and derivatives	氨基酸及其衍生物	C19H29N5O6	3	0.64	-	343283	355078	413877	73046.8	71590.1	62623.7	1.45862	0.00446289	0.0717085	5.36637	2.42395	up	-	-
MW0047849	CL(i-14:0/i-14:0/a-13:0/i-14:0)[rac]	CL(i-14:0/i-14:0/a-13:0/i-14:0)[rac]	GP	甘油磷脂类	CL	心磷脂	C64H124O17P2	3	0.6373	-	10943	18000	27209.3	4897.16	8303.78	6557.56	1.26362	0.117866	0.279314	2.84193	1.50687	up	-	-
MW0132684	3,5,7-trihydroxy-2-(4-hydroxy-3,5-dimethoxyphenyl)-5H-chromen-5-yl	3，5，7-三羟基-2-(4-羟基-3，5-二甲氧基苯基)-5H-色烯-5-基	Heterocyclic compounds	杂环化合物	Heterocyclic compounds	杂环化合物	C17H15O7	3	0.6371	-	20120.7	20860.7	20590	46198.5	77238.6	70408.8	1.40295	0.0426498	0.167561	0.317631	-1.65458	down	-	-
MW0142577	2-succinylbenzoate	2-琥珀酰苯甲酸酯;邻琥珀酰苯甲酸酯;琥珀酰苯甲酸酯	Benzene and substituted derivatives	苯及其衍生物	Benzene and substituted derivatives	苯及其衍生物	C11H10O5	3	0.6368	-	32759.6	35442.9	12952.9	44781.5	98689	76053.5	1.17283	0.080633	0.228132	0.369688	-1.43562	down	C02730	ko00130,ko01100,ko01110,ko01240
MW0132336	3,4,5-Trihydroxy-6-[2-(3-methylbut-2-enoyloxy)-2-[9-(3-methylbut-2-enoyloxy)-2-oxo-8,9-dihydrouro[2,3-h]chromen-8-yl]propoxy]oxane-2-carboxylic acid	3，4，5-三羟基-6-{2-[（3-甲基-2-丁烯酰基）氧基]-2-{9-[（3-甲基-2-丁烯酰基）氧基]-2-氧代-2H，8H，9H-呋喃并[2，3-h]苯并吡喃-8-基}丙氧基}氧烷-2-羧酸	Organic acids	有机酸	Organic acids	有机酸	C30H34O14	3	0.6357	-	51390.3	77762.6	76022.9	158807	167542	111967	1.31369	0.0287326	0.139455	0.4681	-1.09511	down	-	-
MW0137157	8-[3,4,5-trihydroxy-6-(hydroxymethyl)oxan-2-yl]-2-(2,4,5-trihydroxyphenyl)-3,4-dihydro-2H-1-benzopyran-3,5,7-triol	8-[3，4，5-三羟基-6-(羟甲基）恶烷-2-基]-2-(2，4，5-三羟基苯基)-3，4-二氢-2H-1-苯并吡喃-3，5，7-三醇	Benzene and substituted derivatives	苯及其衍生物	Benzene and substituted derivatives	苯及其衍生物	C21H24O12	3	0.6348	-	46332	87769.7	69083.2	159629	155761	109866	1.26667	0.0236843	0.127934	0.477795	-1.06554	down	-	-
MW0141756	(2E)-4-hydroxy-3-methylbut-2-en-1-yl trihydrogen diphosphate	1-羟基-2-甲基-2-丁烯基4-二磷酸；（E)-4-羟基-3-甲基-丁-2-烯基二磷酸酯；（E)-4-羟基-3-甲基丁-2-烯-1-基二磷酸酯	Organic acids	有机酸	Organic acids	有机酸	C5H12O8P2	3	0.6337	-	48693.7	41093.4	62419.9	24394.1	19545	27670	1.35633	0.03682	0.155337	2.12553	1.08782	up	-	-
MW0112383	3,4,5-Trihydroxy-6-(3,4,5-trihydroxycyclohexene-1-carbonyl)oxyoxane-2-carboxylic acid	3，4，5-三羟基-6-(3，4，5-三羟基环己-1-烯-1-甲酰氧基）恶烷-2-羧酸	Organic acids	有机酸	Organic acids	有机酸	C13H18O11	3	0.6321	-	36702.5	36798.1	24657.2	44966.2	86993.9	124532	1.18486	0.144703	0.314483	0.382694	-1.38574	down	-	-
MW0158714	Tyr-Met-OH	Tyr-Met-OH	Amino acids and derivatives	氨基酸及其衍生物	Amino acids and derivatives	氨基酸及其衍生物	C20H22N2O7S	3	0.6313	-	48921.2	93630.9	60316.6	184752	132362	174158	1.33342	0.0107177	0.0948362	0.412946	-1.27598	down	-	-
MW0131933	3,4,5-trihydroxy-6-[4-hydroxy-2-(7-hydroxy-4-oxo-4H-chromen-2-yl)-5-methoxyphenoxy]oxane-2-carboxylic acid	3，4，5-三羟基-6-[4-羟基-2-(7-羟基-4-氧代-4H-苯并吡喃-2-基)-5-甲氧基苯氧基]恶烷-2-羧酸	Organic acids	有机酸	Organic acids	有机酸	C22H20O12	3	0.6311	-	67089.9	49896.8	50345.6	9349.36	19632.8	21226.8	1.34094	0.00694182	0.0830155	3.33272	1.7367	up	-	-
MW0154754	Ophiopogonone B	麦冬高异黄酮 B	Flavonoids	黄酮	Other Flavonoids	其它类黄酮	C18H16O5	3	0.6294	-	31442.1	32918.7	26914.8	1428.22	1212.15	4992.08	1.38308	0.000449693	0.0336544	11.9589	3.58001	up	C17472	-
MW0147661	9-(1,3-benzodioxol-5-yl)-4-[(3R,4R,5R)-3-hydroxy-4,5-dimethoxy-tetrahydropyran-2-yl]oxy-6,7-dimethoxy-3H-benzo[f]isobenzofuran-1-one	Cleistanthin?A	Lignans and Coumarins	木脂素和香豆素	Lignans	木脂素	C28H28O11	3	0.6273	-	5692.98	8603.71	1125.41	21686.2	39456.6	64805.2	1.26856	0.0944411	0.248417	0.122448	-3.02976	down	C10548	-
MW0112626	3,4,5-trihydroxy-6-{[4-hydroxy-7-methoxy-2,2-dimethyl-6-(3-phenylpropanoyl)-3,4-dihydro-2H-1-benzopyran-5-yl]oxy}oxane-2-carboxylic acid	3，4，5-三羟基-6-{[4-羟基-7-甲氧基-2，2-二甲基-6-(3-苯基丙酰基)-3，4-二氢-2H-1-苯并吡喃-5-基]氧}氧杂环己烷-2-羧酸	Organic acids	有机酸	Organic acids	有机酸	C27H32O11	3	0.6255	-	8557.31	11430	7349.64	21521.9	20459.8	25645.4	1.40494	0.00318521	0.0665633	0.40423	-1.30675	down	-	-
MW0151447	Ile-His-Asn-Glu	Ile-His-Asn-Glu	Amino acids and derivatives	氨基酸及其衍生物	Amino acids and derivatives	氨基酸及其衍生物	C21H33N7O8	3	0.6243	-	14223.6	6699.77	11944.5	32726	13953	41555.8	1.10742	0.143557	0.31302	0.372504	-1.42467	down	-	-
MW0151683	Ile-Phe	L-异亮氨酸-L-苯丙氨酸	Amino acids and derivatives	氨基酸及其衍生物	Amino acids and derivatives	氨基酸及其衍生物	C15H22N2O3	3	0.6231	-	264721	294017	353862	1.10217e+06	1.01155e+06	736631	1.40972	0.0227645	0.125655	0.320172	-1.64308	down	-	-
MW0155114	Phe-Asn-Thr-Lys	Phe-Asn-Thr-Lys	Amino acids and derivatives	氨基酸及其衍生物	Amino acids and derivatives	氨基酸及其衍生物	C23H36N6O7	3	0.6215	-	193589	165064	207269	38691.9	25664.6	35406.6	1.44374	0.00346604	0.0665633	5.67265	2.50402	up	-	-
MW0133760	5-({5-[(1-hydroxy-2-methylbut-3-en-2-yl)oxy]-2,2-dimethyl-7-(2-methylbut-3-en-2-yl)-8-oxo-2H,8H-pyrano[3,2-g]chromen-10-yl}oxy)-8,8-dimethyl-3,10-bis(2-methylbut-3-en-2-yl)-2H,8H-pyrano[3,2-g]chromen-2-one	5-({5-[（1-羟基-2-甲基丁-3-烯-2-基）氧基]-2，2-二甲基-7-(2-甲基丁-3-烯-2-基)-8-氧代-2H，8H-吡喃并[3，2-g]苯并吡喃-10-基}氧基)-8，8-二甲基-3，10-双（2-甲基丁-4-烯-2)-2H，8H-吡喃并[3，2-g]苯并吡喃-2-酮	Others	其它类	Ketone compounds	酮类化合物	C48H54O9	3	0.6213	-	121147	145918	124321	48751.8	50694.2	61240.5	1.42822	0.00331236	0.0665633	2.43571	1.28434	up	-	-
MW0147921	Cyclic guanosine monophosphate-adenosine monophosphate	环GMP-AMP；环状GP（2'-5'）AP（3'-5'）；CGAMP（2'-5'）	Organic acids	有机酸	Organic acids	有机酸	C20H24N10O13P2	3	0.6169	-	31096.2	32572.7	67530.8	118013	122654	59316.8	1.11308	0.0913426	0.243613	0.437357	-1.19312	down	C20640	-
MW0151212	HoPhe-Gly-OH	HoPhe-Gly-OH	Others	其它类	Lactones	内酯类化合物	C17H16N2O6	3	0.6041	-	26001.4	32437.9	40383.3	60077.3	62328.8	77198.4	1.34059	0.00909913	0.091316	0.495092	-1.01423	down	-	-
MW0166307	4-deoxy-L-threo-hex-4-enopyranosiduronate-alpha-L-rhamnopyranose 3-sulfate	4-deoxy-L-threo-hex-4-enopyranosiduronate-alpha-L-rhamnopyranose 3-sulfate	Organic acids	有机酸	Organic acids	有机酸	C12H16O13S-2	3	0.6007	-	2476.87	3805.16	8811.31	29459.2	18948.7	17344.9	1.29016	0.029285	0.140648	0.229547	-2.12314	down	-	-
MW0013775	3,4,5-trihydroxy-6-[(E)-2-methyl-3-phenylprop-2-enoxy]oxane-2-carboxylic acid	3，4，5-三羟基-6-{[（2E)-2-甲基-3-苯基-2-丙烯-1-基]氧}氧杂环己烷-2-羧酸	Organic acids	有机酸	Organic acids	有机酸	C16H20O7	3	0.5978	-	1778.17	2841.93	3069.83	4898.82	7835.87	5060.83	1.27699	0.0553562	0.189001	0.432127	-1.21047	down	-	-
MW0052317	D-Gal alpha 1->6D-Gal alpha 1->6D-Glucose	甘露三糖	Others	其它类	Saccharides	糖类	C18H32O16	3	0.5968	-	12255	12779.5	10441.5	41640.4	44317.8	33400.4	1.44357	0.0107832	0.0948362	0.297223	-1.75038	down	C05404	ko00052,ko01100
MW0135804	6-{[2-(3,4-dihydroxyphenyl)-5-hydroxy-4-oxo-6,8-bis[3,4,5-trihydroxy-6-(hydroxymethyl)oxan-2-yl]-4H-chromen-7-yl]oxy}-3,4,5-trihydroxyoxane-2-carboxylic acid	6-{[2-(3，4-二羟基苯基)-5-羟基-4-氧代-6，8-双[3，4，5-三羟基-6-(羟甲基）恶烷-2-基]-4H-苯并吡喃-7-基]氧基}-3，4，5-三羟基恶烷-2-羧酸	Organic acids	有机酸	Organic acids	有机酸	C33H38O22	3	0.5948	-	16157.8	15713.2	13208.5	11712.6	5290.04	2959.9	1.11428	0.0721988	0.21683	2.2582	1.17517	up	-	-
MW0104757	2-Hydroxy-3-(sulfooxy)benzoic acid	2-羟基-3-(磺氧基）苯甲酸	Organic acids	有机酸	Organic acids	有机酸	C7H6O7S	3	0.5942	-	405081	255103	344033	138534	62062.6	201535	1.17269	0.027994	0.13833	2.49724	1.32033	up	-	-
MW0110204	Tyr-His-Arg	酪氨酸-组氨酸-精氨酸	Amino acids and derivatives	氨基酸及其衍生物	Amino acids and derivatives	氨基酸及其衍生物	C21H30N8O5	3	0.5918	-	61060.1	72094	86777.5	15729.6	33102.8	23405.2	1.36115	0.00784003	0.08741	3.04456	1.60623	up	-	-
MW0134554	5-Hydroxy-7-[3,4,5-trihydroxy-6-(hydroxymethyl)oxan-2-yl]oxy-2-(3,4,5-trimethoxyphenyl)chromen-4-one	5-羟基-7-{[3，4，5-三羟基-6-(羟甲基）恶烷-2-基]氧}-2-(3，4，5-三甲氧基苯基)-4H-色烯-4-酮	Others	其它类	Ketone compounds	酮类化合物	C24H26O12	3	0.5901	-	18147.8	15034.2	19804	9642.93	10108	5941.3	1.31427	0.00915128	0.091316	2.06234	1.04428	up	-	-
MW0150473	Gly-Pro-Trp	甘氨酸-脯氨酸-色氨酸	Amino acids and derivatives	氨基酸及其衍生物	Amino acids and derivatives	氨基酸及其衍生物	C18H22N4O4	3	0.5892	-	62837	71195	41799	196672	157542	223167	1.40684	0.0094941	0.0931345	0.304532	-1.71533	down	-	-
MW0132101	3,4,5-Trihydroxy-6-[4-hydroxy-2-oxo-3-(3-oxo-1-phenylbutyl)chromen-7-yl]oxyoxane-2-carboxylic acid	3,4,5-三羟基-6-{[4-羟基-2-氧代-3-(3-氧代-1-苯基丁基)-2H-铬-7-基]氧基}氧烷-2-羧酸	Organic acids	有机酸	Organic acids	有机酸	C25H24O11	3	0.5838	-	27869.8	13113	13414.7	7636.42	167.45	3620.39	1.00598	0.0815702	0.229664	4.76158	2.25144	up	-	-
MW0057610	PC(22:5(7Z,10Z,13Z,16Z,19Z)/15:0)	PC(22:5(7Z,10Z,13Z,16Z,19Z)/15:0)	GP	甘油磷脂类	PC	磷脂酰胆碱	C45H80NO8P	3	0.5831	-	53320.7	57104.5	37880.9	8869.95	5994.21	1295.27	1.31099	0.00988163	0.0937643	9.17768	3.19813	up	C00157	ko00564,ko00590,ko00591,ko00592,ko01100,ko01110
MW0112686	3,4,5-trihydroxy-6-{4-[3-(5-methoxy-2,2-dimethyl-2H-chromen-6-yl)oxirane-2-carbonyl]phenoxy}oxane-2-carboxylic acid	3,4,5-三羟基-6- {4- [3-(5-甲氧基-2,2-二甲基-2H-铬6-基）环氧乙烷-2-羰基]苯氧基}环氧乙烷-2-羧酸	Organic acids	有机酸	Organic acids	有机酸	C27H28O11	3	0.581	-	27240.6	25098.9	11678.5	3357.64	5003.5	16354.8	1.03602	0.110448	0.269111	2.59016	1.37304	up	-	-
MW0126782	Pictilisib	Pictilisib	Heterocyclic compounds	杂环化合物	Heterocyclic compounds	杂环化合物	C23H27N7O3S2	3	0.5782	-	5065.08	3123	6282.99	8202.69	20154.3	8760.02	1.12002	0.186994	0.362429	0.389877	-1.35891	down	-	-
MW0118750	1,3,4-Oxadiazole, 2-methyl-5-[3-[4-(methylsulfinyl)phenyl]-5-benzofuranyl]-	1,3,4-恶二唑，2-甲基-5-[3-[4-(甲基亚磺酰基)苯基]-5-苯并呋喃基]-	Benzene and substituted derivatives	苯及其衍生物	Benzene and substituted derivatives	苯及其衍生物	C18H14N2O3S	3	0.5723	-	1677.89	1342.74	1026.23	2847.31	7017.11	2927.63	1.24611	0.166208	0.339888	0.316357	-1.66037	down	-	-
MW0149622	Gln-Arg-Asp-Glu	谷酰氨-精氨酸-天冬门氨酸-谷氨酸	Amino acids and derivatives	氨基酸及其衍生物	Amino acids and derivatives	氨基酸及其衍生物	C20H34N8O10	3	0.5717	-	343793	355597	313470	766123	790634	891130	1.45236	0.00329739	0.0665633	0.413769	-1.2731	down	-	-
MW0135786	6-{[2-(3,4-dihydroxyphenyl)-4-[2-(3,4-dihydroxyphenyl)-3,5,7-trihydroxy-3,4-dihydro-2H-1-benzopyran-8-yl]-3,5-dihydroxy-6-[3,4,5-trihydroxy-6-(hydroxymethyl)oxan-2-yl]-3,4-dihydro-2H-1-benzopyran-7-yl]oxy}-3,4,5-trihydroxyoxane-2-carboxylic acid	6-{[2-(3，4-二羟基苯基)-4-[2-(3，4-二羟基苯基)-3，5，7-三羟基-3，4-二氢-2H-1-苯并吡喃-8-基]-3，5-二羟基-6-[3，4，5-三羟基-6-(羟甲基）恶烷-2-基]-3，4-三氢-2H-1-苯并吡喃-7-基]氧基}-3，4，5-三羟基恶烷-2-羧酸	Organic acids	有机酸	Organic acids	有机酸	C42H44O23	3	0.5692	-	44875.8	64262.3	145213	190842	293529	164253	1.14609	0.0617523	0.198291	0.392139	-1.35056	down	-	-
MW0150569	Glycopeptide	糖肽	Amino acids and derivatives	氨基酸及其衍生物	Amino acids and derivatives	氨基酸及其衍生物	C36H64N8O17	3	0.5685	-	314228	308847	323635	117715	132127	207593	1.3311	0.0256689	0.132797	2.06961	1.04936	up	C00528	-
MW0130295	2-(4-Methoxyphenyl)-1-(2,4,5-trihydroxyphenyl)propan-1-one	2-(4-甲氧基苯基)-1-(2，4，5-三羟基苯基）丙-1-酮	Others	其它类	Ketone compounds	酮类化合物	C16H16O5	3	0.56	-	22376	28022	20431.8	57232.6	42672.3	43643.6	1.38203	0.0204658	0.118789	0.493421	-1.01911	down	-	-
MEDL02271	Licoagrochalcone C	刺果甘草查耳酮 C	Flavonoids	黄酮	Chalcones	查耳酮	C21H22O5	3	0.5558	-	358242	125215	372049	620208	535536	589746	1.07752	0.0551221	0.188618	0.490124	-1.02878	down	-	-
MW0154308	Naringin chalcone	柚皮苷查尔酮	Others	其它类	Ketone compounds	酮类化合物	C27H32O14	3	0.5525	-	1123.67	2237.83	1248.56	3456.13	51397.4	11406.5	1.16364	0.300197	0.469624	0.0695753	-3.84528	down	-	-
MW0112620	3,4,5-trihydroxy-6-{[4-hydroxy-2,5-bis(hydroxymethyl)-2-{[3,4,5-trihydroxy-6-(hydroxymethyl)oxan-2-yl]oxy}oxolan-3-yl]oxy}oxane-2-carboxylic acid	3，4，5-三羟基-6-{[4-羟基-2，5-二（羟甲基)-2-{[3，4，5-三羟基-6-(羟甲基）恶烷-2-基]氧}氧杂环戊烷-3-基]氧}恶烷-2-羧酸	Organic acids	有机酸	Organic acids	有机酸	C18H30O17	3	0.5502	-	42328.1	34645.5	34168.8	4371.75	18589	17752.2	1.14365	0.0188982	0.116237	2.7299	1.44885	up	-	-
MEDP0224	D-Fructose	D-果糖	Others	其它类	Saccharides	糖类	C6H12O6	3	0.5487	-	14569	9972.93	8567.14	37761.8	29351.5	39304.4	1.40349	0.00508725	0.074936	0.311124	-1.68444	down	C05003	-
MW0103413	6-Mercaptopurine ribonucleoside 5'-diphosphate	6-巯基嘌呤核苷5-二磷酸	Nucleotides and derivatives	核苷酸及其衍生物	Nucleotides and derivatives	核苷酸及其衍生物	C10H14N4O10P2S	3	0.5473	-	19073.8	13924.7	5617.26	393.92	491.89	7417.35	1.09184	0.106429	0.263659	4.65074	2.21746	up	C16616	-
MW0136155	6-[2-[2-(2,4-Dihydroxyphenyl)-2-oxoethyl]-5-hydroxy-3-methoxy-4-(3-methylbut-2-enyl)phenoxy]-3,4,5-trihydroxyoxane-2-carboxylic acid	6-{2-[2-(2，4-二羟基苯基)-2-氧代乙基]-5-羟基-3-甲氧基-4-(3-甲基丁-2-烯-1-基）苯氧基}-3，4，5-三羟基恶烷-2-羧酸	Organic acids	有机酸	Organic acids	有机酸	C26H30O12	3	0.5447	-	2.64039e+07	2.46037e+07	2.76914e+07	1.11821e+07	1.1398e+07	1.0557e+07	1.45908	0.00192554	0.0528668	2.37495	1.2479	up	-	-
MEDN1405	Indole-3-acetic acid ethyl ester	3-吲哚乙酸乙酯	Alkaloids	生物碱	Plumerane	吲哚类生物碱	C12H13NO2	3	0.5443	-	795377	715280	832888	107933	152898	179706	1.44137	0.000335523	0.029939	5.31975	2.41136	up	-	-
MW0012363	(5Z,8Z,11Z,14S,15R)-14,15-dihydroxyicosa-5,8,11-trienoic acid?	(5Z,8Z,11Z,14S,15R)-14,15-dihydroxyicosa-5,8,11-trienoic acid?	Lipids	脂质	Free fatty acids	游离脂肪酸	C20H34O4	3	0.5377	-	19930.8	27152.2	21692	98550.2	51876.9	44813.6	1.30538	0.127316	0.291294	0.352257	-1.5053	down	-	-
MW0140467	(R)-NADPHX	(R)-NADPHX	Nucleotides and derivatives	核苷酸及其衍生物	Nucleotides and derivatives	核苷酸及其衍生物	C21H32N7O18P3	3	0.5377	-	4982.05	4846.41	5093.93	564.42	1450.96	1423.22	1.36279	0.00387195	0.0685005	4.33967	2.11759	up	C20483	-
MW0128584	[2,6-dihydroxy-3-(7-hydroxy-4-oxo-4H-chromen-2-yl)phenyl]oxidanesulfonic acid	[2，6-二羟基-3-(7-羟基-4-氧代-4H-苯并吡喃-2-基）苯基]氧代磺酸	Organic acids	有机酸	Organic acids	有机酸	C15H10O9S	3	0.533	-	2506.7	2077.77	2703.07	1269.12	1144.35	705.75	1.33914	0.00533829	0.0752923	2.33633	1.22425	up	-	-
MW0108382	N-(2-((N-(2-((N-(2-((N-(2-Hydroxypropanoyl)valyl)oxy)-3-methylbutanoyl)valyl)oxy)propanoyl)valyl)oxy)-3-methylbutanoyl)valine	N-(2-((N-(2-((N-(2-((N-(2-Hydroxypropanoyl)valyl)oxy)-3-methylbutanoyl)valyl)oxy)propanoyl)valyl)oxy)-3-methylbutanoyl)valine	Amino acids and derivatives	氨基酸及其衍生物	Amino acids and derivatives	氨基酸及其衍生物	C36H62N4O13	3	0.5325	-	5605.23	19464.8	3287.54	15484.1	29027.6	25420.6	1.07168	0.102253	0.258754	0.4055	-1.30222	down	-	-
MW0104525	2-amino-4-({1-[(carboxymethyl)-C-hydroxycarbonimidoyl]-2-[(1,3-dihydroxy-2-pentyl-1-phenylpropan-2-yl)sulfanyl]ethyl}-C-hydroxycarbonimidoyl)butanoic acid	2-氨基-4-({1-[（羧甲基)-C-羟基亚氨基甲酰基]-2-[（1，3-二羟基-2-戊基-1-苯基丙-2-基）硫烷基]乙基}-C-羟基亚氨基甲酰基）丁酸	Organic acids	有机酸	Organic acids	有机酸	C24H37N3O8S	3	0.5223	-	7186.97	21439.9	37575.4	164254	158614	49213.8	1.19132	0.105629	0.262223	0.177924	-2.49067	down	-	-
MW0135808	6-{[2-(3,4-dihydroxyphenyl)-5-hydroxy-4-oxo-8-(3,4,5-trihydroxyoxan-2-yl)-4H-chromen-7-yl]oxy}-3,4,5-trihydroxyoxane-2-carboxylic acid	6-{[2-(3，4-二羟基苯基)-5-羟基-4-氧代-8-(3，4，5-三羟基恶烷-2-基)-4H-苯并吡喃-7-基]氧}-3，4，5-三羟基恶烷-2-羧酸	Organic acids	有机酸	Organic acids	有机酸	C26H26O16	3	0.5182	-	1643.77	2326.57	3006.04	844.24	626.8	1921.47	1.07048	0.100346	0.256308	2.05641	1.04013	up	-	-
MW0132479	3,4,5-trihydroxy-6-{4-[1-hydroxy-3-(5-methoxy-2,2-dimethyl-2H-chromen-6-yl)propyl]phenoxy}oxane-2-carboxylic acid	3,4,5-三羟基-6- {4- [1-羟基-3-(5-甲氧基-2,2-二甲基-2H-铬6-基）丙基]苯氧基}氧烷-2-羧酸	Organic acids	有机酸	Organic acids	有机酸	C27H32O10	3	0.5147	-	4546.1	6633.75	4845.96	8886.87	10687.8	15621.9	1.30127	0.0747812	0.221171	0.455323	-1.13504	down	-	-
MW0049813	1-Hexadecanoyl-2-eicosanoyl-sn-glycerol	1-Hexadecanoyl-2-eicosanoyl-sn-glycerol	GL	甘油脂类	DG	甘油二酯	C39H76O5	3	0.512	-	163312	111963	170908	323.68	11910	5711.04	1.28545	0.0141345	0.104574	24.8644	4.63601	up	-	-
MEDN1827	N-hydroxy-2-(N-isopropoxybiphenyl-4-ylsulfonamido)acetamide	ARP-100	Benzene and substituted derivatives	苯及其衍生物	Benzene and substituted derivatives	苯及其衍生物	C17H20N2O5S	3	0.5115	-	32717	24590.6	25048	71292.9	85912.2	88944.5	1.42962	0.00334357	0.0665633	0.334575	-1.5796	down	-	-
MW0128124	(3-{8-[1-(2,4-dihydroxyphenyl)-2-hydroxy-3-(3-hydroxyphenyl)propyl]-3,5,7-trihydroxy-3,4-dihydro-2H-1-benzopyran-2-yl}phenyl)oxidanesulfonic acid	（3-{8-[1-(2,4-二羟苯基)-2-羟基-3-(3-羟基苯基）丙基]-3,5,7-三羟基-3,4-二氢-2H-1-苯并吡喃-2-基]苯基）氧化磺酸	Organic acids	有机酸	Organic acids	有机酸	C30H28O12S	3	0.5107	-	69438.7	42291.6	26958.8	88290.2	94648.6	100054	1.20962	0.0520599	0.182998	0.49008	-1.02891	down	-	-
MW0011054	(2E,6E,11E,13E)-18-(2,6-dioxopiperidin-4-yl)-9-hydroxy-8-methoxy-10,12,14-trimethyl-15-oxooctadeca-2,6,11,13-tetraenoic acid	(2E,6E,11E,13E)-18-(2,6-dioxopiperidin-4-yl)-9-hydroxy-8-methoxy-10,12,14-trimethyl-15-oxooctadeca-2,6,11,13-tetraenoic acid	FA	脂肪酰类	Others	其它	C27H39NO7	3	0.5033	-	7645.89	7173.01	4720.1	19239.7	19332.9	22342.9	1.41902	0.000576477	0.0356647	0.320756	-1.64045	down	-	-
MW0113506	6-[4-(2-{[2-(3,4-dimethoxyphenyl)ethyl]-C-hydroxycarbonimidoyl}ethyl)-2-methoxyphenoxy]-3,4,5-trihydroxyoxane-2-carboxylic acid	6-[4-(2-{[2-(3,4-二甲氧基苯基）乙基]-C-羟基碳酰亚胺基}乙基)-2-甲氧基苯氧基]-3,4,5-三羟基氧烷-2-羧酸	Organic acids	有机酸	Organic acids	有机酸	C26H33NO11	3	0.5014	-	22025.1	10218	23173.6	11288.6	6010.02	9018.58	1.09804	0.131695	0.296634	2.10572	1.07431	up	-	-
