# Supplementary material
Source: Research Square preprint supplement (doi:10.21203/rs.3.rs-9628093/v1)
Supplement: Supplementary file 3 [file 8f12e1cc07bba5d5caa3b096.xlsx]

## Sheet: Sheet1
Index	Compounds	物质	Class I	物质一级分类	Class II	物质二级分类	Formula	Level	score	CAS	DNPP-1	DNPP-2	DNPP-3	DCK-1	DCK-2	DCK-3	VIP	P-value	FDR	Fold_Change	Log2FC	Type	cpd_ID	kegg_map
MW0138675	3''-O-L-Rhamnopyranosylastragalin	3''-OL-Rhamnopyranosylastragalin	Flavonoids	黄酮	Flavones	黄酮	C27H30O15	2	0.9177	28447-29-2	1.82457e+06	644111	485862	1.59831e+06	2.24261e+06	2.0988e+06	1.06584	0.127841	0.288446	0.497421	-1.00746	down	-	-
MW0141122	Dioleoylphosphatidylcholine	二油酰磷脂酰胆碱	GP	甘油磷脂类	PC	磷脂酰胆碱	C44H84NO8P	2	0.9082	52088-89-8	1.10149e+07	1.14749e+07	1.78817e+07	3.12108e+07	6.76338e+07	5.42715e+07	1.34335	0.0660316	0.212363	0.263666	-1.92321	down	-	-
MW0158008	(E)-3,5,4'-Trimethoxystilbene	白藜芦醇三甲醚	Others	其它类	Stilbene	茋类	C17H18O3	2	0.8866	22255-22-7	11185.5	15919.3	14557.5	80929.8	66863.2	56138	1.4306	0.0144639	0.120825	0.204296	-2.29126	down	-	-
MW0056883	Colfosceril palmitate	菊苣棕榈酸酯	GP	甘油磷脂类	PC	磷脂酰胆碱	C40H80NO8P	2	0.8838	63-89-8	78610.7	55909	66702.2	119946	186821	142182	1.35645	0.0411061	0.173549	0.448206	-1.15776	down	C00157	ko00564,ko00590,ko00591,ko00592,ko01100,ko01110
MW0006649	Convoline	康沃林	Others	其它类	Lactones	内酯类化合物	C16H21NO5	2	0.883	89783-61-9	11409.3	6887.56	4977.85	24715.6	20233.9	28886.8	1.34646	0.00704869	0.10294	0.315221	-1.66556	down	C10855	-
MW0137432	kaempferol 3-O-beta-D-galactopyranosyl-7-O-alpha-L-rhamnopyranoside	山奈酚3-O-BETA-D-吡喃半乳糖-7-O-ALPHA-L-吡喃鼠李糖苷	Flavonoids	黄酮	Flavonols	黄酮醇	C27H30O15	2	0.8711	38784-79-1	968086	1.21054e+06	646617	254286	244737	736922	1.0929	0.0829898	0.2348	2.28589	1.19276	up	-	-
MADN0564	2-Pyrimidineacetic acid	2-嘧啶乙酸	Heterocyclic compounds	杂环化合物	Heterocyclic compounds	杂环化合物	C6H6N2O2	2	0.8528	66621-73-6	16959.4	19253	15005.2	3676.91	4222.41	3889.82	1.4488	0.00780607	0.10294	4.34447	2.11918	up	-	-
MW0126762	Thiamine phosphoric acid ester	硫胺素单磷酸盐	Organic acids	有机酸	Organic acids	有机酸	C12H17N4O4PS	2	0.8457	495-23-8	23567.1	16570	25143.6	1466.25	167.54	594.2	1.38255	0.0138985	0.118764	29.3002	4.87284	up	-	-
MW0012269	13(S)-Hydroperoxylinolenic acid	13-氢过氧化-9Z,11E,15Z-十八碳三烯酸	Lipids	脂质	Free fatty acids	游离脂肪酸	C18H30O4	2	0.8274	67597-26-6	23566.1	53238.4	46315.2	351674	233475	69951.4	1.1776	0.160587	0.325666	0.18794	-2.41166	down	C04785	ko00592,ko01100,ko01110
MW0062178	Pristanic acid	Pristanic acid	Terpenoids	萜类	Ditepenoids	二萜	C19H38O2	2	0.8172	1189-37-3	14848.2	21254.5	27175.4	9404.86	12133.4	10002.2	1.2769	0.0900784	0.243569	2.00626	1.00451	up	-	-
MW0049063	Cryptotanshinone	隐丹参酮	Others	其它类	Ketone compounds	酮类化合物	C19H20O3	2	0.8105	35825-57-1 | 4733-35-1	438564	275145	394461	1.0693e+06	934559	1.32259e+06	1.39463	0.0124191	0.114817	0.333139	-1.5858	down	-	-
MW0015643	Alloxanthin	四黄素	Alcohol and amines	醇、胺类	Alcohols	醇类	C40H52O2	2	0.8012	28380-31-6	14495.7	11543.6	3141.26	66726.1	54964.9	33555.4	1.27543	0.0376764	0.167772	0.187963	-2.41148	down	-	-
MW0107797	Leu-Ile	亮氨酸异亮氨酸	Amino acids and derivatives	氨基酸及其衍生物	Amino acids and derivatives	氨基酸及其衍生物	C12H24N2O3	2	0.7968	36077-41-5 | 91605-03-7	1008.14	1296.95	2383.46	9777.49	15245.9	20611.7	1.39916	0.0464805	0.181137	0.10274	-3.28293	down	-	-
MW0104181	3-Oxoglutaric acid	1,3-丙酮二甲酸	Organic acids	有机酸	Organic acids	有机酸	C5H6O5	2	0.7915	542-05-2	9631.01	10774.5	17425.2	3235.58	2771.34	3132.05	1.41495	0.0584517	0.202273	4.13949	2.04945	up	-	-
MW0110760	2S-Amino-4E-pentadecene-1,3R-diol	2S-氨基-4E-十五碳烯-1,3R-二醇	Alcohol and amines	醇、胺类	Alcohols	醇类	C15H31NO2	2	0.7842	86555-28-4	1717.56	1450.39	1162.94	94778.6	89486.6	109778	1.45839	0.00391613	0.0915745	0.0147288	-6.08522	down	-	-
MW0012950	1-O-Octadecyl-2-O-methyl-sn-glycero-3-phosphocholine	2-O-甲基PAF C-18	GP	甘油磷脂类	PC	磷脂酰胆碱	C27H58NO6P	2	0.783	77286-66-9	8589.75	29089	5942	180119	100261	78818	1.32009	0.0690818	0.215437	0.121439	-3.04169	down	-	-
MW0103367	3-Deaza-2'-deoxyadenosine	3-Deaza-2'-脱氧腺苷	Nucleotides and derivatives	核苷酸及其衍生物	Nucleotides and derivatives	核苷酸及其衍生物	C11H14N4O3	2	0.7806	78582-17-9	275544	346224	366594	62966.9	89787.9	217591	1.20347	0.0298186	0.153711	2.66876	1.41617	up	-	-
MW0109433	Pro-Ser	L-脯氨酰-L-丝氨酸	Amino acids and derivatives	氨基酸及其衍生物	Amino acids and derivatives	氨基酸及其衍生物	C8H14N2O4	2	0.7798	71835-80-8	9710.51	14869	7800.76	38881.6	55160.8	33208.8	1.38022	0.031045	0.155594	0.254459	-1.97449	down	-	-
MW0116253	N-1,3-benzoxazol-2-ylguanidine	N-苯并恶唑-2-基胍	Benzene and substituted derivatives	苯及其衍生物	Benzene and substituted derivatives	苯及其衍生物	C8H8N4O	2	0.7791	39123-82-5	274694	171415	178803	552894	512555	408004	1.35701	0.00778181	0.10294	0.424114	-1.23748	down	-	-
MW0123058	Benzimidazole	苯并咪唑	Benzene and substituted derivatives	苯及其衍生物	Benzene and substituted derivatives	苯及其衍生物	C7H6N2	2	0.7761	51-17-2	4785.71	4233.77	743.03	10273	6924.08	10537.4	1.0734	0.0255183	0.147162	0.351998	-1.50636	down	C02009	-
MW0138536	Isorhoifolin	异山豆素	Heterocyclic compounds	杂环化合物	Heterocyclic compounds	杂环化合物	C27H30O14	2	0.7757	552-57-8	67384	26709.3	37277.2	147027	147366	110633	1.31927	0.00611675	0.101413	0.324351	-1.62437	down	-	-
MW0122042	6-Butyltetrahydro-2H-pyran-2-one	6-丁基四氢-2H-吡喃-2-酮	Others	其它类	Ketone compounds	酮类化合物	C9H16O2	2	0.775	3301-94-8	16625.5	19430.5	15304.2	249334	197085	93792.5	1.40825	0.0703421	0.217447	0.095074	-3.3948	down	-	-
MW0015606	Ailanthone	臭椿酮	Terpenoids	萜类	Ditepenoids	二萜	C20H24O7	2	0.7733	981-15-7	11936.7	23730.8	23365.8	74041.6	63110.1	38207.1	1.26871	0.0537386	0.193768	0.336643	-1.57071	down	C08747	-
MEDL00438	1,4-Dihydroxy-2-naphthoic acid	1,4-二羟基-2-萘甲酸	Benzene and substituted derivatives	苯及其衍生物	Benzene and substituted derivatives	苯及其衍生物	C11H8O4	2	0.7732	31519-22-9	66159.9	55734.7	131431	25948.6	29662.3	59919.5	1.0664	0.182458	0.347538	2.19272	1.13272	up	C03657	ko00130,ko01100,ko01110,ko01240
MW0114649	Isomaltose	异麦芽糖	Others	其它类	Saccharides	糖类	C12H22O11	2	0.7721	499-40-1	111957	28133	47874.9	2691.14	4759.44	42370.6	1.02438	0.204163	0.369323	3.77279	1.91563	up	C00252	ko00500,ko01100
MW0009430	Phenylpropiolic acid	苯丙酸	Benzene and substituted derivatives	苯及其衍生物	Benzene and substituted derivatives	苯及其衍生物	C9H6O2	2	0.7698	637-44-5	201030	295852	261108	347657	889548	693073	1.20355	0.128475	0.28924	0.392685	-1.34856	down	-	-
MW0157000	Ser-Gln	丝氨酰谷氨酰胺	Amino acids and derivatives	氨基酸及其衍生物	Amino acids and derivatives	氨基酸及其衍生物	C8H15N3O5	2	0.7681	94421-66-6	18794.1	25225.5	24689.9	9735.78	7529.05	10420.9	1.40157	0.0119272	0.113715	2.48177	1.31137	up	-	-
MW0139541	3-[(2S,3R,4S,5S,6R)-4,5-dihydroxy-6-(hydroxymethyl)-3-[(2S,3R,4R,5R,6S)-3,4,5-trihydroxy-6-methyloxan-2-yl]oxyoxan-2-yl]oxy-2-(3,4-dihydroxyphenyl)-5-hydroxy-7-[(2S,3R,4R,5R,6S)-3,4,5-trihydroxy-6-methyloxan-2-yl]oxychromen-4-one	3-[(2S,3R,4S,5S,6R)-4,5-二羟基-6-(羟甲基)-3-[(2S,3R,4R,5R,6S)-3,4,5-三羟基- 6-methyloxan-2-yl]oxyoxan-2-yl]oxy-2-(3,4-dihydroxyphenyl)-5-hydroxy-7-[(2S,3R,4R,5R,6S)-3,4,5 -trihydroxy-6-methyloxan-2-yl]oxychromen-4-one	Flavonoids	黄酮	Flavones	黄酮	C33H40O20	2	0.767	161993-01-7	82919.5	27542.5	22043.8	128479	140288	147318	1.2507	0.0319574	0.156817	0.318459	-1.65082	down	-	-
MW0012930	Hexanolamino PAF C-16	己醇氨基PAF C-16	GP	甘油磷脂类	PC	磷脂酰胆碱	C30H62NO7P	2	0.7664	137566-83-7	4948.11	6878.96	2338.22	18954.6	13118.2	10694.9	1.24666	0.040304	0.171982	0.331215	-1.59416	down	-	-
MW0115743	11-Hydroxytetrahydrocannabinol	11-羟基-Δ9-四氢大麻酚	Others	其它类	Others	其它	C21H30O3	2	0.7662	36557-05-8	4256.37	1708.29	1331.82	33168	28323	39349.6	1.41606	0.00668083	0.10188	0.0723566	-3.78873	down	-	-
MW0169689	Pomiferin	石榴苷	Flavonoids	黄酮	Other Flavonoids	其它类黄酮	C25H24O6	2	0.7647	572-03-2	240024	478327	336685	105631	109574	117238	1.37571	0.0732003	0.222284	3.17359	1.66611	up	-	-
MW0106444	Dihydrofolic acid	二氢叶酸	Organic acids	有机酸	Organic acids	有机酸	C19H21N7O6	2	0.7645	4033-27-6	22005.4	15998.7	17958.3	60423.2	58655.5	39394.8	1.38876	0.0300075	0.153711	0.353134	-1.50171	down	C00415	ko00670,ko00790,ko01100,ko01240
MW0126037	Papaverine	罂粟碱	Alkaloids	生物碱	Isoquinoline alkaloids	异喹啉类生物碱	C20H21NO4	2	0.7625	61-25-6	135658	108519	204410	9915.11	11471.6	24035.5	1.40414	0.0394132	0.170048	9.87595	3.30392	up	C06533	ko00950,ko01110
MW0149263	Levoleucovorin	亚叶酸;叶绿素; 5-甲酰基四氢叶酸; L（-)-5-甲酰基-5,6,7,8-四氢叶酸	Organic acids	有机酸	Organic acids	有机酸	C20H23N7O7	2	0.7622	68538-85-2 | 58-05-9	12811.1	8596.44	8129.96	29788.1	33578.9	20376.7	1.35903	0.0315005	0.156156	0.352713	-1.50343	down	C03479	ko00670,ko01100
MW0122604	8-Deoxylactucin	8-去氧山莴苣素	Terpenoids	萜类	Sesquiterpenoids	倍半萜	C15H16O4	2	0.7608	65725-10-2	338592	299418	190286	99476.2	141454	172142	1.18847	0.0707203	0.217857	2.00521	1.00375	up	C09392	-
MW0108024	Lys-Trp-Lys	L-赖氨酸-L-色氨酸-L-赖氨酸	Amino acids and derivatives	氨基酸及其衍生物	Amino acids and derivatives	氨基酸及其衍生物	C23H36N6O4	2	0.7607	38579-27-0	11428.5	27949.5	24846.4	61066.7	42516.6	42360.3	1.18486	0.0290442	0.15317	0.440063	-1.18422	down	-	-
MW0130408	Maesopsin	2，4，6-三羟基-2-[（4-羟基苯基）甲基]-2，3-二氢-1-苯并呋喃-3-酮	Benzene and substituted derivatives	苯及其衍生物	Benzene and substituted derivatives	苯及其衍生物	C15H12O6	2	0.7604	5989-16-2	73655.7	71577.9	75088.6	6860.92	13331.9	67345.2	1.03512	0.146918	0.310995	2.51688	1.33163	up	-	-
MW0012952	1-O-Octadecyl-SN-glycero-3-phosphocholine	1-O-十八烷基-sn-甘油基-3-磷酸胆碱	GP	甘油磷脂类	PC	磷脂酰胆碱	C26H56NO6P	2	0.7598	74430-89-0	15959.2	14433.6	12479	30374.2	38502.9	46239.8	1.40906	0.0295168	0.153711	0.37242	-1.425	down	C04317	ko00565,ko01100
MW0125208	Monocrotaline	野百合碱	Alkaloids	生物碱	Pyrrole alkaloids	吡咯类生物碱	C16H23NO6	2	0.7568	315-22-0	15172	7064.8	6594.26	23583.3	18616.6	25526.7	1.25289	0.0232204	0.143893	0.425698	-1.2321	down	-	-
MW0012346	13(S)-HpOTrE(gamma)	13-氢过氧化-6Z,9Z,11E-十八碳三烯酸	Lipids	脂质	Free fatty acids	游离脂肪酸	C18H30O4	2	0.7553	121107-97-9	23513.9	102576	17400.3	640324	520777	162054	1.25974	0.106804	0.265437	0.108446	-3.20496	down	-	-
MEDL00365	Tyrosylleucine	酪氨酸-亮氨酸	Amino acids and derivatives	氨基酸及其衍生物	Amino acids and derivatives	氨基酸及其衍生物	C15H22N2O4	2	0.753	17355-10-1	16123.1	34193.6	24498.5	3228.48	4519.54	6418.9	1.37515	0.0566576	0.199917	5.28098	2.4008	up	C73328	-
MW0063379	N-[(2R)-1-Hydroxypropan-2-yl]hexadecanamide	R-棕榈酰基-(1-甲基）乙醇酰胺	FA	脂肪酰类	Others	其它	C19H39NO2	2	0.7516	142128-47-0	3598.9	264.01	185.2	12116.2	9796.26	13441.6	1.25172	0.00255899	0.0848121	0.114502	-3.12656	down	-	-
MW0012963	1-Palmitoyl-sn-glycero-3-phosphoethanolamine	溶血磷脂酰乙醇胺 16:0	Lipids	脂质	LPE	溶血磷脂酰乙醇胺	C21H44NO7P	2	0.7498	53862-35-4	144020	140724	171934	35598.2	34817.1	81649.2	1.30983	0.00831848	0.104885	3.00319	1.58649	up	-	-
mws4076	18alpha-Glycyrrhetinic acid	18α-甘草次酸	Organic acids	有机酸	Organic acids	有机酸	C30H46O4	2	0.749	1449-05-4	28789.4	27913.4	26915.4	12950	14178.9	9357.89	1.39831	0.00394597	0.0915745	2.29174	1.19644	up	-	-
MW0000198	Corynoline	紫堇醇灵碱	Alkaloids	生物碱	Isoquinoline alkaloids	异喹啉类生物碱	C21H21NO5	2	0.7445	18797-79-0 | 68035-45-0	19132.5	50828.3	18156.8	67037.4	81556	52913.9	1.15888	0.0529625	0.19325	0.437292	-1.19333	down	-	-
MW0001218	Propylene glycol dibenzoate	DL-丙二醇二苯甲酸酯	Benzene and substituted derivatives	苯及其衍生物	Benzene and substituted derivatives	苯及其衍生物	C17H16O4	2	0.7432	19224-26-1	30540.5	13301.4	18820.4	40669.7	50012.1	40990	1.24259	0.0258236	0.148071	0.475898	-1.07128	down	-	-
MW0125855	N-Methylphthalimide	N-甲基邻苯二甲酰亚胺	Alcohol and amines	醇、胺类	Amines	胺类	C9H7NO2	2	0.7401	550-44-7	11852.6	21497.4	18820.3	9265.64	5057.1	8977.79	1.22712	0.0602904	0.204793	2.23902	1.16287	up	-	-
MW0049106	Cyclopamine	环巴胺	Alkaloids	生物碱	Terpenoid alkaloids	萜类生物碱	C27H41NO2	2	0.7399	4449-51-8 | 11051-96-0	30365	41174.1	24840.5	42684.2	373647	161061	1.10437	0.239352	0.405327	0.166922	-2.58275	down	C10798	-
MW0138962	Micromelin	Micromelin	Others	其它类	Lactones	内酯类化合物	C15H12O6	2	0.7363	15085-71-9	244925	194071	243371	43993.8	60328.6	165855	1.16191	0.0523251	0.192188	2.52563	1.33664	up	C09277	-
MW0052336	Diethyl fumarate	富马酸二乙酯	Others	其它类	Lactones	内酯类化合物	C8H12O4	2	0.735	623-91-6 | 26298-06-6	171142	161378	114962	321222	340401	273600	1.37235	0.00372197	0.0894815	0.478476	-1.06348	down	-	-
MW0006902	Methyldiphenylphosphine oxide	二苯基甲基氧化膦	Benzene and substituted derivatives	苯及其衍生物	Benzene and substituted derivatives	苯及其衍生物	C13H13OP	2	0.7348	2129-89-7	4424.84	6258.68	5475.66	10226.2	14044.6	8428.97	1.2916	0.0679985	0.213965	0.494169	-1.01692	down	-	-
MW0168670	9,12-Octadecadiynoic Acid	9,12-十八碳二烯酸	Lipids	脂质	Free fatty acids	游离脂肪酸	C18H28O2	2	0.7302	2012-14-8	6241.37	22787	19940.6	161755	116210	84773.6	1.33337	0.0370902	0.166464	0.134998	-2.88899	down	-	-
MW0015831	Antheraxanthin	花药黄质	Heterocyclic compounds	杂环化合物	Heterocyclic compounds	杂环化合物	C40H56O3	2	0.7292	640-03-9 | 68831-78-7 | 25494-44-4	226773	307453	242269	69947.8	28515	70087.9	1.36076	0.00482081	0.0973666	4.6069	2.2038	up	C08579	ko00906,ko01100,ko01110
MW0124226	Garcinone D	伽升沃 D	Flavonoids	黄酮	Other Flavonoids	其它类黄酮	C24H28O7	2	0.726	107390-08-9	18506.7	13462.5	4339.91	24085	30314.9	22386.2	1.05107	0.061969	0.207159	0.472861	-1.08051	down	-	-
MW0153228	Lys-Lys	赖氨酰赖氨酸	Amino acids and derivatives	氨基酸及其衍生物	Amino acids and derivatives	氨基酸及其衍生物	C12H26N4O3	2	0.724	13184-13-9	32605.2	54425.2	50746.2	386697	249053	82641.9	1.21387	0.157862	0.322818	0.191785	-2.38244	down	-	-
MW0127754	(+)-Medicarpin	美迪紫檀素	Flavonoids	黄酮	Other Flavonoids	其它类黄酮	C16H14O4	2	0.7231	33983-39-0 | 33983-40-3	164394	220178	211251	32508.9	31399.6	135382	1.17384	0.0427897	0.175859	2.98972	1.58001	up	C01729	-
MW0055282	Neotigogenin acetate	新替告皂苷元乙酯	Steroids	甾体	Steroid	甾体	C29H46O4	2	0.7229	4948-43-0	34466.6	15993	19916.5	59257.8	56215.6	103494	1.30135	0.0693652	0.215865	0.3214	-1.63756	down	-	-
MEDP1087	MG(18:2/0:0/0:0)	MAG 18:2	GL	甘油脂类	MG	单甘油酯	C21H38O4	2	0.7217	26545-74-4	69812.8	88655.6	84576.5	32341.4	27158.9	39174.5	1.40609	0.00401128	0.0916863	2.46309	1.30047	up	-	-
MW0108782	N-Formyl-Met-Leu-Phe	N-甲酰基-L-甲硫氨酰-L-亮氨酰-L-苯丙氨酸	Amino acids and derivatives	氨基酸及其衍生物	Amino acids and derivatives	氨基酸及其衍生物	C21H31N3O5S	2	0.7198	59880-97-6	15387.6	25738.1	30895.6	11228.4	7943.91	13642.9	1.21601	0.0896391	0.243071	2.19476	1.13406	up	-	-
MW0012533	16Z,19Z,22Z,25Z,28Z,31Z-tetratriacontahexaenoic acid	34：6（16Z，19Z，22Z，25Z，28Z，31Z）	Lipids	脂质	Free fatty acids	游离脂肪酸	C34H56O2	2	0.7149	105528-06-1	15605.5	13482.4	13217.7	42679.2	39570.9	54834.5	1.43671	0.0188863	0.133581	0.30861	-1.69615	down	-	-
MEDTN00198	L-Cysteinesulfinic acid	3-磺基-L-丙氨酸	Amino acids and derivatives	氨基酸及其衍生物	Amino acids and derivatives	氨基酸及其衍生物	C3H7NO4S	2	0.7106	1115-65-7	36749.2	58929.4	49471.6	12188.9	13466.2	13400.2	1.42801	0.0310171	0.155594	3.71653	1.89396	up	C00606	ko00270,ko00430,ko01100
MW0125626	N-Acetyl-L-tryptophanamide	乙炔基乙酰胺	Alcohol and amines	醇、胺类	Amines	胺类	C13H15N3O2	2	0.7074	2382-79-8	15418.8	10687.2	13488.5	32797.2	22417	26093.7	1.34023	0.0290043	0.15317	0.486971	-1.03809	down	-	-
MW0061828	Pinolenic Acid ethyl ester	松油酸乙酯	FA	脂肪酰类	Others	其它	C20H34O2	2	0.7069	493015-74-0	9415.62	11692.1	27484.6	50528.2	37153	31946	1.17492	0.0405609	0.172347	0.406198	-1.29974	down	-	-
MW0113800	7-Hydroxy-3,7-dimethyloctanal	7-羟基-3,7-二甲基辛醛	Others	其它类	Aldehyde compounds	醛类化合物	C10H20O2	2	0.7061	107-75-5	16956.3	20711.7	26659.7	147554	102861	41841.8	1.26154	0.130154	0.290902	0.220107	-2.18372	down	-	-
MW0155655	Polyphyllin B	多酚B	Terpenoids	萜类	Terpene	萜类	C51H82O20	3	0.9986	50773-42-7	5855.89	5886.97	8864.15	23688.3	18755.1	20675.8	1.40313	0.00202228	0.0802	0.326478	-1.61494	down	-	-
MW0148248	Deltonin	三角叶薯蓣皂苷	Steroids	甾体	Steroidal saponins	甾体皂苷	C45H72O17	3	0.9986	55659-75-1	94038.7	75789.7	84281.2	21151.1	35876.8	38404.9	1.35202	0.00216986	0.0811752	2.66271	1.41289	up	C08894	-
MEDP0160	Adenosine	腺苷	Nucleotides and derivatives	核苷酸及其衍生物	Nucleotides and derivatives	核苷酸及其衍生物	C10H13N5O4	3	0.9883	58-61-7	1.29115e+06	1.44609e+06	1.78406e+06	72681.3	227576	491830	1.26745	0.00312787	0.0850936	5.70809	2.51301	up	C00212	ko00230,ko01100,ko01232,ko02010
ZINC13548595	(9Z,12Z)-octadeca-9,12-dienal	(9Z,12Z)-octadeca-9,12-dienal	Lipids	脂质	Free fatty acids	游离脂肪酸	C18H32O	3	0.9806	2541-61-9	78322.4	99784.4	104548	4311.47	3034.7	4156.41	1.45544	0.00775173	0.10294	24.5732	4.61901	up	-	-
MEDP1061	o-Tyrosine	DL-邻酪氨酸	Amino acids and derivatives	氨基酸及其衍生物	Amino acids and derivatives	氨基酸及其衍生物	C9H11NO3	3	0.9799	2370-61-8	156788	179418	194396	430829	365333	412943	1.42885	0.00169694	0.0792302	0.438839	-1.18824	down	-	-
MW0159737	Tunicamycin	Tunicamycin	Others	其它类	Others	其它	C39H64N4O16	3	0.9788	11089-65-9	189.89	650.71	364.91	1846.37	638.15	1395.04	1.1338	0.113668	0.273132	0.310734	-1.68625	down	C12063	-
MEDP0874	Lenticin	香菇素	Organic acids	有机酸	Organic acids	有机酸	C14H18N2O2	3	0.9771	487-58-1	372334	133546	162930	362283	484140	531427	1.14079	0.0680289	0.213965	0.485401	-1.04275	down	C09213	-
MEDL02751	2',3,4,4',6'-Pentahydroxychalcone	3,4,2',4',6'-五羟基查耳酮	Flavonoids	黄酮	Chalcones	查耳酮	C15H12O6	3	0.9763	14917-41-0 | 73692-51-0	35805.3	39438.5	45277.7	6691.03	6783.97	35436.2	1.0757	0.120746	0.279704	2.46409	1.30105	up	-	-
MW0104030	(S,S)-Np-Histidinylalanine	（S，S)-NP-组氨酰丙氨酸	Organic acids	有机酸	Organic acids	有机酸	C9H14N4O4	3	0.97	87047-17-4	277926	193729	203376	79940.8	105707	97722.7	1.38121	0.0311785	0.155594	2.38215	1.25226	up	-	-
MEDN0455	Guanine	鸟嘌呤	Nucleotides and derivatives	核苷酸及其衍生物	Nucleotides and derivatives	核苷酸及其衍生物	C5H5N5O	3	0.9692	73-40-5	36991.9	68429.6	55293.3	171605	149156	87995.9	1.24987	0.0665674	0.213008	0.39318	-1.34674	down	C00242	ko00230,ko01100,ko01232
MW0063305	Radiclonic acid	自由基酸	Terpenoids	萜类	Ditepenoids	二萜	C23H40O5	3	0.9653	49620-14-6	9131.78	6603.47	8241.66	30654.1	28437.8	50612.3	1.41055	0.054382	0.195002	0.21856	-2.1939	down	-	-
MEDN1024	D-piperidine acid	D-哌啶酸	Organic acids	有机酸	Organic acids	有机酸	C6H11NO2	3	0.9646	1723-00-8	33394.7	46224.8	36541.2	17585	9020.86	22127.5	1.24292	0.0145383	0.120825	2.38359	1.25314	up	-	-
MEDN1426	9(S),12(S),13(S)-TriHOME	9(S),12(S),13(S)-三羟基-10(E)-十八烯酸	Lipids	脂质	Free fatty acids	游离脂肪酸	C18H34O5	3	0.9625	97134-11-7	18741.4	22843.9	22852.9	252964	166053	60290.9	1.31712	0.131025	0.291866	0.13444	-2.89496	down	C14833	ko00591
MEDN0275	1-Caffeoylquinic acid	1-咖啡酰奎宁酸	Phenolic acids	酚酸类	Phenolic acids	酚酸类	C16H18O9	3	0.9614	1241-87-8 | 928005-87-2	428088	350482	417397	491178	879688	1.99246e+06	1.07228	0.249296	0.414749	0.35559	-1.49171	down	-	-
MEDP1647	2-Amino-1-phenylethanol	苯基乙醇胺	Alkaloids	生物碱	Alkaloids	生物碱	C8H11NO	3	0.9611	7568-93-6	187492	221871	231579	523240	442239	499109	1.42795	0.00177361	0.0797717	0.437626	-1.19223	down	C02735	-
MW0011404	Farnesylacetone	金合欢基乙酰	Others	其它类	Ketone compounds	酮类化合物	C18H30O	3	0.9601	1117-52-8 | 762-29-8	129334	144603	127129	12177.7	9899.39	9399.52	1.45691	0.00160459	0.0787176	12.7417	3.67149	up	-	-
MW0111391	4-O-feruloyl-D-quinic acid	4-阿魏酰奎宁酸	Organic acids	有机酸	Organic acids	有机酸	C17H20O9	3	0.9563	76272-56-5	24764.1	48551.4	70316.8	4280.29	259.82	9669.78	1.1661	0.0760995	0.225768	10.1079	3.33741	up	-	-
MW0103084	Venturicidin A	文丘里西丁A	Others	其它类	Others	其它	C41H67NO11	3	0.955	33538-71-5	250824	213897	112772	80543.9	66295.9	89859.1	1.23218	0.106751	0.265437	2.43978	1.28675	up	-	-
Hmpn005101	3-Hydroxyphloretin-4'-glucoside	3-羟基根皮苷	Flavonoids	黄酮	Chalcones	查耳酮	C21H24O11	3	0.9545	18777-73-6	161833	70989.8	82967.5	25474	6919.4	54627.7	1.10525	0.0983827	0.25269	3.62889	1.85953	up	-	-
MEDN1089	FFA(17:1)	1-顺-十七碳烯酸(17:1n7)	Lipids	脂质	Free fatty acids	游离脂肪酸	C17H32O2	3	0.9541	29743-97-3	46.22	4173.85	674.16	16543.8	14637.8	19557.2	1.16132	0.0014272	0.0735801	0.0964594	-3.37393	down	-	-
MEDL02396	Sucrose	D-蔗糖	Others	其它类	Saccharides	糖类	C12H22O11	3	0.9466	57-50-1	269795	254294	109295	515446	431033	396089	1.18548	0.0235776	0.143893	0.47177	-1.08384	down	C00089	ko00052,ko00500,ko01100,ko01110,ko02010
MEDP1440	Carnitine C5:0(3-Methylbutyrylcarnitine)	肉碱 C5:0	FA	脂肪酰类	CAR	酰基肉碱	C12H23NO4	3	0.9458	31023-24-2	55402.1	68440.8	68107	29222.2	27788.1	26963	1.44082	0.0123951	0.114817	2.28584	1.19273	up	-	-
MEDL01799	Isoscutellarein	异野黄芩素	Flavonoids	黄酮	Flavones	黄酮	C15H10O6	3	0.9457	41440-05-5	408310	128160	94842.4	287896	445600	829715	1.02062	0.189904	0.356022	0.403856	-1.30809	down	-	-
MEDP1339	LPC(18:1/0:0)	LPC(18:1/0:0)	Lipids	脂质	LPC	溶血磷脂酰胆碱	C26H53NO7P	3	0.9426	3542-29-8	374588	495992	574841	167700	184357	232436	1.37981	0.0288465	0.15317	2.47295	1.30623	up	-	-
MEDL02145	Procyanidin B1	原花青素 B1	Tannins	鞣质	Proanthocyanidins	原花青素	C30H26O12	3	0.9403	20315-25-7	576369	579425	627205	147359	134621	292622	1.34689	0.00975697	0.109972	3.10302	1.63367	up	-	-
MEDN0684	Methyl?beta-D-galactopyranoside	甲基β-D-吡喃半乳糖苷	Others	其它类	Saccharides	糖类	C7H14O6	3	0.9391	1824-94-8	69795.1	46838.8	16291.7	201221	150903	193937	1.28083	0.00335801	0.0850936	0.243426	-2.03844	down	-	-
MEDL00414	D-Arabinose-5-phosphate	D-阿拉伯糖5-磷酸	Others	其它类	Saccharides	糖类	C5H11O8P	3	0.9328	13137-52-5	858057	1.14838e+06	1.22346e+06	319396	377056	381699	1.42614	0.0205314	0.138277	2.99578	1.58293	up	C01112	ko01100,ko01250
MEDP1122	1-Hexadecanoyl-sn-glycerol	1-单棕榈精	GL	甘油脂类	DG	甘油二酯	C19H38O4	3	0.9294	32899-41-5	118806	93684.2	83408.2	221584	204334	186255	1.39669	0.00198211	0.0802	0.483357	-1.04884	down	-	-
MEDN0403	Urocanic acid	尿刊酸	Organic acids	有机酸	Organic acids	有机酸	C6H6N2O2	3	0.9293	3465-72-3	68145.3	74868.3	70722	190092	160240	185270	1.44623	0.00560604	0.0998888	0.399056	-1.32534	down	C00785	ko00340,ko01100
MW0009686	Rivenprost	利文前列素	Benzene and substituted derivatives	苯及其衍生物	Benzene and substituted derivatives	苯及其衍生物	C24H34O6S	3	0.9285	256382-08-8	7666.76	17959.5	8908.27	46337.1	60424.4	40356.8	1.3628	0.0106969	0.112223	0.23474	-2.09086	down	-	-
MW0148965	Epothilone D	埃博霉素D	Others	其它类	Ketone compounds	酮类化合物	C27H41NO5S	3	0.9273	189453-10-9	2525.25	5833.08	3175.71	32600.3	20928.2	8555.9	1.25639	0.133162	0.294304	0.18578	-2.42833	down	-	-
MEDTP01470	Octyl-Beta-D-Glucopyranoside	n-辛基-β-D-吡喃葡萄糖苷	Others	其它类	Saccharides	糖类	C14H28O6	3	0.9191	29836-26-8 | 144388-20-5 | 78168-20-4	17755.1	9486.12	32584.9	68269.9	55396.4	38374.1	1.17372	0.0390444	0.169473	0.369205	-1.43751	down	-	-
MEDL02244	Podofilox	苦鬼臼毒素	Lignans and Coumarins	木脂素和香豆素	Lignans	木脂素	C22H22O8	3	0.9188	477-47-4	12157.2	8784.94	5540.77	79837.1	69647.7	90403.4	1.43216	0.00385831	0.0915113	0.110397	-3.17923	down	C10874	ko00999,ko01100,ko01110
MW0139747	Spinosin A	斯皮诺辛A	Flavonoids	黄酮	Flavones	黄酮	C39H42O19	3	0.9166	77690-91-6	8775	38332	16923.8	447417	363366	170145	1.36593	0.0635776	0.208924	0.0652758	-3.93731	down	-	-
MEDP0513	Palmitic amide	十六碳酰胺	Others	其它类	Others	其它	C16H33NO	3	0.916	629-54-9	417894	485257	503068	15581.1	11069.7	16344	1.4562	0.00314141	0.0850936	32.7068	5.03152	up	-	-
MEDP0574	Oleamide	油酸酰胺 (9-十八碳烯酰胺)	Lipids	脂质	Free fatty acids	游离脂肪酸	C18H35NO	3	0.9021	301-02-0	1.73472e+06	1.91263e+06	2.21728e+06	2247.45	308774	6220.02	1.23296	0.000717478	0.0679408	18.4864	4.20839	up	C19670	-
MW0112925	3'-Sialyllactosamine	3'-唾液酸乳糖胺	Alcohol and amines	醇、胺类	Amines	胺类	C23H40N2O18	3	0.8825	126151-66-4	13299.4	9871.25	5172	53992.3	39729.7	35975.7	1.36714	0.0142687	0.120256	0.218528	-2.19411	down	-	-
MW0149372	N-Demethylconoduramine B640243K425	N-去甲基康诺杜拉明 B640243K425	Alkaloids	生物碱	Alkaloids	生物碱	C42H50N4O5	3	0.8775	66086-99-5	193762	219050	155989	63783	84361.9	104259	1.33702	0.0124624	0.114817	2.25354	1.17219	up	-	-
MEDL02211	Sesamol	芝麻酚	Lignans and Coumarins	木脂素和香豆素	Lignans	木脂素	C7H6O3	3	0.8719	533-31-3	1.05289e+06	880316	1.02867e+06	154268	186742	810711	1.10358	0.0979037	0.25269	2.57169	1.36272	up	C10832	-
MEDN1026	Biosone	次甘草酸(β型)	Terpenoids	萜类	Triterpene	三萜	C30H46O4	3	0.8569	471-53-4	34555.6	29599.8	29796.5	47054.5	62200.7	96186.3	1.27246	0.123095	0.283173	0.457317	-1.12873	down	C02283	-
MW0118238	2-Amino-1,4-dihydro-4-oxopteridine-7-carboxylic acid	2-氨基-1,4-二氢-4-氧代蝶啶-7-羧酸	Heterocyclic compounds	杂环化合物	Pteridines and derivatives	蝶啶及其衍生物	C7H5N5O3	3	0.8541	31010-60-3	35998.7	28316.6	26761.5	71751.4	59090.8	55493.8	1.38723	0.00953334	0.109689	0.488778	-1.03275	down	-	-
MEDL02220	Nicotine	烟碱	Alkaloids	生物碱	Pyridine alkaloids	吡啶类生物碱	C10H14N2	3	0.85	54-11-5	30004.1	39080.5	27963.9	212621	76452.8	102948	1.30693	0.141413	0.303776	0.247559	-2.01416	down	C00745	ko00760,ko00960,ko01100,ko01110
MEDL01856	Umbelliferone	7-羟基香豆素	Lignans and Coumarins	木脂素和香豆素	Coumarins	香豆素	C9H6O3	3	0.8413	93-35-6	101673	162535	147750	553425	581294	425913	1.40918	0.00822142	0.104228	0.263969	-1.92156	down	C09315	ko00999,ko01110
MEDL00434	Turanose	松二糖	Others	其它类	Saccharides	糖类	C12H22O11	3	0.8256	547-25-1	375403	360804	333885	1.65368e+06	1.14612e+06	1.48035e+06	1.43991	0.0182893	0.132184	0.250013	-1.99993	down	C19636	-
MEDL00009	L-Valine	L-缬氨酸	Amino acids and derivatives	氨基酸及其衍生物	Amino acids and derivatives	氨基酸及其衍生物	C5H11NO2	3	0.789	72-18-4	109990	90749.7	54368.8	245010	183631	183234	1.30673	0.0118118	0.113186	0.41693	-1.26212	down	C00183	ko00280,ko00290,ko00460,ko00770,ko00966,ko00970,ko01100,ko01110,ko01210,ko01230,ko01240,ko02010
MW0136756	6''-O-Acetylgenistin	6''-O-乙酰染料木苷	Flavonoids	黄酮	Isoflavones	异黄酮	C23H22O11	3	0.7886	73566-30-0	10387.5	9393.01	12576.5	608.99	241.73	1162.5	1.39323	0.00541687	0.099615	16.0723	4.0065	up	-	-
MEDN1335	Cinnamoylglycine	肉桂酰甘氨酸	Amino acids and derivatives	氨基酸及其衍生物	Amino acids and derivatives	氨基酸及其衍生物	C11H11NO3	3	0.7879	16534-24-0	17692.4	23974.5	13643.5	31835.8	368284	189517	1.17393	0.208217	0.374322	0.0938042	-3.4142	down	-	-
FDATN01339	Vitexin 2''-O-rhamnoside	牡荆素-2''-O-鼠李糖苷	Flavonoids	黄酮	Flavones	黄酮	C27H30O14	3	0.7836	64820-99-1	19534.8	24974.9	23818	4144.51	856.34	5296.09	1.28789	0.000991154	0.0686411	6.63573	2.73026	up	C12628	ko00944
MW0000486	Ethyl eburnamenine-14-carboxylate	Ethyl eburnamenine-14-carboxylate	Alkaloids	生物碱	Alkaloids	生物碱	C22H26N2O2	3	0.7718	77549-94-1 | 68780-77-8	9837.47	19604.5	18519.4	133965	81117.6	29692.1	1.20783	0.159809	0.324982	0.195941	-2.35151	down	-	-
MEDN1013	2'-Deoxyadenosine-5'-monophosphate	2'-脱氧腺苷-5'-单磷酸	Nucleotides and derivatives	核苷酸及其衍生物	Nucleotides and derivatives	核苷酸及其衍生物	C10H14N5O6P	3	0.7711	653-63-4	20603	12496.1	16325.7	554.4	1044.97	6919.86	1.20743	0.0122995	0.114817	5.80155	2.53644	up	C00360	ko00230,ko01100,ko01232
MEDN1417	13-Hpode	13-过氧化羟基-9Z,11E-十八碳二烯酸	Lipids	脂质	Free fatty acids	游离脂肪酸	C18H32O4	3	0.7702	23017-93-8	20922.2	40214.6	17347.2	111428	82031.8	54110.1	1.27084	0.059614	0.203838	0.317017	-1.65737	down	C04717	ko00591,ko01100
MEDL02189	Gramine	芦竹碱	Alkaloids	生物碱	Plumerane	吲哚类生物碱	C11H14N2	3	0.7702	87-52-5	64705.5	56568.5	55969.1	114611	89145.7	178857	1.27146	0.122755	0.282671	0.463243	-1.11016	down	C08304	ko00999,ko01110
MW0002036	2-(Methylamino)benzoic acid	N-邻氨基苯甲酸甲酯	Benzene and substituted derivatives	苯及其衍生物	Benzene and substituted derivatives	苯及其衍生物	C8H9NO2	3	0.7694	119-68-6	10965.9	2032.83	7017.38	19670.5	17336.1	18119.4	1.1282	0.0380098	0.167896	0.363098	-1.46157	down	C03005	ko00996,ko01110
MEDP1315	Quinoline	喹啉	Alkaloids	生物碱	Quinoline alkaloids	喹啉类生物碱	C9H7N	3	0.7659	91-22-5	5137.62	9953.55	4403.27	24696	63994.8	23489.6	1.3171	0.143714	0.307013	0.173778	-2.52469	down	C06413	-
MEDN1556	L-Allothreonine	L-别苏氨酸	Amino acids and derivatives	氨基酸及其衍生物	Amino acids and derivatives	氨基酸及其衍生物	C4H9NO3	3	0.7609	24830-94-2	8192.08	10694	13636.8	7498.86	3646.25	1940.8	1.15079	0.0466316	0.181215	2.48533	1.31344	up	C05519	ko00260,ko01100
MEDN0052	N6-Acetyl-L-lysine	N6-乙酰-L-赖氨酸	Amino acids and derivatives	氨基酸及其衍生物	Amino acids and derivatives	氨基酸及其衍生物	C8H16N2O3	3	0.76	692-04-6	123732	156034	83130.6	3791.15	9242.84	10549.7	1.40574	0.0320125	0.156851	15.3876	3.94369	up	C02727	ko00310,ko01100
MEDN0037	Dopamine	多巴胺	Alkaloids	生物碱	Phenolamine	酚胺	C8H11NO2	3	0.76	62-31-7	12018.1	6780.32	29188.4	33919	38687.1	29255.5	1.05719	0.102647	0.258288	0.471099	-1.0859	down	C03758	ko00350,ko00950,ko00965,ko01100,ko01110
MW0015543	Acetyl-L-carnitine	乙酰左旋肉碱	Alkaloids	生物碱	Alkaloids	生物碱	C9H17NO4	3	0.7595	3040-38-8 | 14992-62-2	20883.5	27923.6	24499.6	33731.5	69088.7	78067.6	1.23044	0.114699	0.27419	0.405261	-1.30308	down	C02571	-
MEDP1018	5'-Deoxyadenosine	5-脱氧腺嘌呤核苷	Nucleotides and derivatives	核苷酸及其衍生物	Nucleotides and derivatives	核苷酸及其衍生物	C10H13N5O3	3	0.7562	4754-39-6	116294	99934.7	86329.3	25372.9	65649.9	25515.9	1.23439	0.0237614	0.143893	2.5962	1.3764	up	C05198	-
MEDP0777	Diethyl malonate	丙二酸二乙酯	Organic acids	有机酸	Organic acids	有机酸	C7H12O4	3	0.7491	105-53-3	15721.3	6764.37	9833.54	30081.1	28151.6	25643.9	1.31401	0.010766	0.112223	0.385318	-1.37588	down	-	-
MW0001791	1H-Benz(de)isoquinoline-1,3(2H)-dione, 2-(2-hydroxyethyl)-5-nitro-	1H-Benz(de)isoquinoline-1,3(2H)-dione, 2-(2-hydroxyethyl)-5-nitro-	Benzene and substituted derivatives	苯及其衍生物	Benzene and substituted derivatives	苯及其衍生物	C14H10N2O5	3	0.7482	79070-65-8	17458.4	5552.88	5674.24	142233	38806	85551.2	1.32137	0.115209	0.274363	0.107601	-3.21623	down	-	-
MW0001255	Squoxin	Squoxin	Benzene and substituted derivatives	苯及其衍生物	Benzene and substituted derivatives	苯及其衍生物	C21H16O2	3	0.7481	1096-84-0	601.23	450.54	436.9	2108.84	1318.92	3535.88	1.35416	0.105592	0.264059	0.213778	-2.22582	down	-	-
MEDL00722	Fumaric acid	富马酸盐	Organic acids	有机酸	Organic acids	有机酸	C4H4O4	3	0.7474	110-17-8	28790.2	37550.3	32083.5	4794.94	8960.71	3664.86	1.3961	0.00183283	0.0797717	5.64989	2.49822	up	C00122	ko00020,ko00190,ko00220,ko00250,ko00350,ko00360,ko00620,ko00650,ko00760,ko01100,ko01110,ko01200
ZINC85531494	4H-1-Benzopyran-4-one,5,6,7,8-tetrahydro-5,6,7-trihydroxy-8-[[4-oxo-2-(2-phenylethyl)-4H-1-benzopyran-6-yl]oxy]-2-(2-phenylethyl)-, (5S,6R,7R,8S)	2-(2-苯乙基)-6-[[（5S，6R，7R，8S)-5，6，7-三羟基-4-氧代-2-(2-苯乙基)-5，6，7，8-四氢苯并吡喃-8-基]氧]苯并吡喃-4-酮	Others	其它类	Ketone compounds	酮类化合物	C34H30O8	3	0.747	121795-56-0	9479.39	3676.9	7645.53	48857.5	32407.2	28187.2	1.35952	0.0350891	0.162003	0.190055	-2.39551	down	-	-
MW0104179	(5,6,7-Triacetyloxy-2,2-dimethyl-3a,4,5,6,7,7a-hexahydro-1,3-benzodioxol-4-yl) acetate	(5,6,7-Triacetyloxy-2,2-dimethyl-3a,4,5,6,7,7a-hexahydro-1,3-benzodioxol-4-yl) 乙酸酯	Organic acids	有机酸	Organic acids	有机酸	C17H24O10	3	0.7467	26276-98-2	7391.54	10106.2	7512.73	16358.3	24176.5	12878	1.26722	0.096667	0.251421	0.468249	-1.09465	down	-	-
MW0107859	Levulinic acid	枸杞酸	Organic acids	有机酸	Organic acids	有机酸	C5H8O3	3	0.746	123-76-2	13737.2	19555	19852.6	4595.18	9701.54	8903.98	1.24323	0.0189048	0.133581	2.29066	1.19576	up	-	-
MEDL02309	Inosinic acid	肌苷5'-单磷酸	Nucleotides and derivatives	核苷酸及其衍生物	Nucleotides and derivatives	核苷酸及其衍生物	C10H13N4O8P	3	0.7451	131-99-7 | 30918-54-8 | 25249-22-3	95008.3	68796.3	95805.4	33149	27629.8	24694.6	1.41838	0.0168217	0.127675	3.03732	1.6028	up	C00130	ko00230,ko01100,ko01110,ko01232,ko01240
MW0128010	6,8-Di-C-glucopyranosylnaringenin	6,8-二-C-吡喃葡萄糖基柚皮素	Others	其它类	Ketone compounds	酮类化合物	C27H32O15	3	0.745	81446-26-6	233.64	1323.56	2329.63	8562.15	9407.64	2485.77	1.08735	0.118015	0.277261	0.190013	-2.39583	down	-	-
MEDP0453	Indole	吲哚	Alkaloids	生物碱	Plumerane	吲哚类生物碱	C8H7N	3	0.7446	120-72-9	188421	150124	188123	25874.9	32787.3	145303	1.09469	0.096972	0.251644	2.58215	1.36857	up	C00463	ko00380,ko00400,ko00402,ko00999,ko01100,ko01110
MW0011985	methyl (4S,5E,6S)-5-(2-acetyloxyethylidene)-4-[2-[2-(4-hydroxyphenyl)ethoxy]-2-oxoethyl]-6-[(2S,3R,4S,5S,6R)-3,4,5-trihydroxy-6-(hydroxymethyl)oxan-2-yl]oxy-4H-pyran-3-carboxylate	甲基 (4S,5E,6S)-5-(2-乙酰氧基亚乙基)-4-[2-[2-(4-羟基苯基)乙氧基]-2-氧乙基]-6-[(2S,3R,4S,5S, 6R)-3,4,5-trihydroxy-6-(hydroxymethyl)oxan-2-yl]oxy-4H-pyran-3-carboxylate	Terpenoids	萜类	Terpene	萜类	C27H34O14	3	0.7439	57799-95-8	769.73	4064.57	3792.77	94.58	94.58	94.58	1.3873	0.118967	0.277294	30.4048	4.92623	up	-	-
MEDN0422	2'-Deoxyadenosine	2'-脱氧腺苷	Nucleotides and derivatives	核苷酸及其衍生物	Nucleotides and derivatives	核苷酸及其衍生物	C10H13N5O3	3	0.7433	958-09-8	3973.59	6468.44	5568.56	13414.1	12222.4	10104.2	1.34446	0.00688416	0.10238	0.447966	-1.15854	down	C00559	ko00230,ko01100,ko01232,ko02010
MEDP0437	Ergothioneine	麦角硫因	Alkaloids	生物碱	Alkaloids	生物碱	C9H15N3O2S	3	0.743	497-30-3	221001	220126	215135	64060.8	80061.7	66689.2	1.44796	0.000313585	0.0659656	3.11303	1.63832	up	C05570	ko00340,ko01100
MEDL00977	(E,Z)-2-Amino-3,14-octadecadien-1-ol	（E，Z)-2-氨基-3,14-十八二烯-1-醇	Alcohol and amines	醇、胺类	Alcohols	醇类	C18H35NO	3	0.7416	158507-68-7	1955.1	2457.43	3965.76	187	239.15	54.94	1.38929	0.047798	0.183747	17.4152	4.12228	up	-	-
MW0157326	methyl (1R,12R,14S,15E)-12-[(1R,15S,17S,18S)-17-ethyl-3,13-diazapentacyclo[13.3.1.02,10.04,9.013,18]nonadeca-2(10),4(9),5,7-tetraen-6-yl]-15-ethylidene-17-methyl-10,17-diazatetracyclo[12.3.1.03,11.04,9]octadeca-3(11),4,6,8-tetraene-18-carboxylate	methyl (1R,12R,14S,15E)-12-[(1R,15S,17S,18S)-17-ethyl-3,13-diazapentacyclo[13.3.1.02,10.04,9.013,18]nonadeca-2(10),4(9),5,7-tetraen-6-yl]-15-ethylidene-17-methyl-10,17-diazatetracyclo[12.3.1.03,11.04,9]octadeca-3(11),4,6,8-tetraene-18-carboxylate	Alkaloids	生物碱	Alkaloids	生物碱	C40H48N4O2	3	0.7411	59626-92-5	272.19	1200.23	2999.6	23244.4	19581.7	32121.2	1.32477	0.02033	0.138227	0.0596688	-4.06688	down	C09242	-
MEDP1427	Carnitine C8:0(Octanoylcarnitine)	肉碱 C8:0	FA	脂肪酰类	CAR	酰基肉碱	C15H29NO4	3	0.7386	25243-95-2	86603.6	85798.7	102263	198665	247007	288286	1.41669	0.0235715	0.143893	0.374225	-1.41802	down	-	-
MEDL02596	6''-O-Acetylglycitin	乙酰黄豆黄苷	Flavonoids	黄酮	Isoflavones	异黄酮	C24H24O11	3	0.7383	134859-96-4	119563	94293.9	112570	28266.8	32609.5	34928.2	1.4406	0.00655523	0.101413	3.40722	1.76859	up	-	-
MW0017008	N-tetracosanoylsphingosine	神经酰胺（d18：1/24：0）	SL	鞘脂类	Cer	神经酰胺	C42H83NO3	3	0.7366	34435-05-7	19817.4	12069.8	8838.55	33662	106574	174282	1.27908	0.152752	0.317032	0.129487	-2.94912	down	C00195	ko00600,ko01100
MW0126230	Primaquine phosphate	磷酸伯氨喹	Organic acids	有机酸	Organic acids	有机酸	C15H27N3O9P2	3	0.7363	63-45-6	4963.79	4576.34	3229.27	1301.69	916.98	1584.02	1.37734	0.0195565	0.135704	3.35799	1.7476	up	-	-
MEDL02258	Nordihydrocapsaicin	去甲二氢辣椒素	Alkaloids	生物碱	Phenolamine	酚胺	C17H27NO3	3	0.734	28789-35-7	444.23	775.79	2780.17	18201.3	15524.2	22805.3	1.3583	0.0085515	0.106245	0.0707612	-3.8209	down	C20216	-
MEDL01954	2'-Hydroxygenistein	2'-羟基染料木素	Flavonoids	黄酮	Isoflavones	异黄酮	C15H10O6	3	0.7339	1156-78-1	4469.27	25173.2	33089.4	4503.58	2064.8	2608.53	1.15652	0.170598	0.335697	6.83584	2.77312	up	C12134	ko00943
MW0122226	(6-methoxy-1H-indol-2-yl)(4-methylpiperazin-1-yl)methanone	(6-甲氧基-1H-吲哚-2-基)(4-甲基哌嗪-1-基)甲酮	Alkaloids	生物碱	Plumerane	吲哚类生物碱	C15H19N3O2	3	0.7332	459168-90-2	17984.2	13619.6	17389.3	7051.38	6938.82	7595.56	1.42296	0.0197927	0.136802	2.2697	1.1825	up	-	-
MW0009985	Trimethoprim	甲氧苄啶	Phenolic acids	酚酸类	Phenolic acids	酚酸类	C14H18N4O3	3	0.7332	738-70-5	18957.5	27452.9	21597.2	8759.06	7939.2	9782.19	1.41184	0.0270157	0.149764	2.56822	1.36077	up	C01965	-
MW0015129	7,8-Dihydro-3b,6a-dihydroxy-alpha-ionol 9-[apiosyl-(1->6)-glucoside]	7,8-Dihydro-3b,6a-dihydroxy-alpha-ionol 9-[apiosyl-(1->6)-glucoside]	Others	其它类	Saccharides	糖类	C24H42O12	3	0.7325	177261-73-3	3845.83	3806.5	6452.31	1630.81	3487.4	977.09	1.11032	0.0832224	0.235006	2.31402	1.2104	up	-	-
MW0111377	(1-Hydroxycyclohexyl)acetic acid	(1-羟基环己基)乙酸	Organic acids	有机酸	Organic acids	有机酸	C8H14O3	3	0.7319	14399-63-4	5567.02	5366.32	3776.57	20476.9	22334	17200	1.43271	0.00472972	0.0969504	0.24512	-2.02844	down	-	-
MW0006920	DMABA NHS Ester	DMABA NHS酯	Benzene and substituted derivatives	苯及其衍生物	Benzene and substituted derivatives	苯及其衍生物	C13H14N2O4	3	0.7314	58068-85-2	89172.3	78213	93165.9	272462	217482	235058	1.43787	0.00727691	0.10294	0.35938	-1.47642	down	-	-
MEDL01940	Feruloylputrescine	阿魏酰腐胺	Alkaloids	生物碱	Phenolamine	酚胺	C14H20N2O3	3	0.7307	501-13-3 | 91000-11-2	296002	368359	384528	163078	173601	132951	1.40939	0.00949039	0.109689	2.23344	1.15926	up	-	-
MW0006646	Conivaptan	康尼伐坦	Benzene and substituted derivatives	苯及其衍生物	Benzene and substituted derivatives	苯及其衍生物	C32H26N4O2	3	0.7292	210101-16-9	7637.33	4867.95	7386.39	17469	13189	11148.5	1.2884	0.0413407	0.173594	0.475804	-1.07156	down	-	-
MEDL02383	Ethyl gallate	没食子酸乙酯	Phenolic acids	酚酸类	Phenolic acids	酚酸类	C9H10O5	3	0.7276	831-61-8	13425.2	20313.5	16902.5	2204.37	2486.99	3703.61	1.42557	0.0154988	0.123259	6.03232	2.59271	up	-	-
MEDN0469	Citraconic acid	柠康酸	Organic acids	有机酸	Organic acids	有机酸	C5H6O4	3	0.7261	498-23-7	30004.7	18445.5	17557.3	141.93	942.27	3702.92	1.25204	0.0295415	0.153711	13.7886	3.7854	up	C02226	ko00290,ko00660,ko01100,ko01210
MW0119154	3,3-Dimethyl-1,2-dithiolane	3,3-二甲基-1,2-二硫杂环戊烷	Heterocyclic compounds	杂环化合物	Heterocyclic compounds	杂环化合物	C5H10S2	3	0.7261	58384-57-9	1522.92	3675.34	1476.19	12054.4	10406.2	5313	1.28454	0.0607057	0.205302	0.240316	-2.05699	down	-	-
MEDP1904	1-(9Z,12Z-octadecadienoyl)-glycero-3-phosphoethanolamine	LPE(18:2/0:0)	GP	甘油磷脂类	LPE	溶血磷脂酰乙醇胺	C23H44NO7P	3	0.7252	85046-18-0	604057	537380	623962	149182	153550	388234	1.2418	0.0347877	0.161532	2.55498	1.35331	up	-	-
MW0001222	1-(Dimethylamino)-3-(1-naphthalenyloxy)-2-propanol	1-(二甲氨基)-3-(1-萘氧基)-2-丙醇	Benzene and substituted derivatives	苯及其衍生物	Benzene and substituted derivatives	苯及其衍生物	C15H19NO2	3	0.7244	2111-26-4	5363.93	7536.47	4514.29	1445.6	1948.91	2620.55	1.33594	0.0384766	0.168779	2.89518	1.53365	up	-	-
MW0123504	Decitabine	地西他滨; 5-氮杂-2'-脱氧胞嘧啶核苷 <DNA甲基转移酶(DNMT)抑制剂>	Nucleotides and derivatives	核苷酸及其衍生物	Nucleotides and derivatives	核苷酸及其衍生物	C8H12N4O4	3	0.7243	2353-33-5	20066	28032.1	23711.3	88510.8	75699.9	98225	1.43304	0.00554156	0.0996622	0.273627	-1.86972	down	-	-
MW0123420	coproporphyrinogen III	卟啉原	Heterocyclic compounds	杂环化合物	Heterocyclic compounds	杂环化合物	C36H44N4O8	3	0.724	2624-63-7	71537	36094.2	49253.2	116986	103430	119465	1.3099	0.0144214	0.120825	0.461587	-1.11533	down	C03263	ko00860,ko01100,ko01110,ko01240
FDATP01159	Phenazine methosulfate	吩嗪硫酸甲酯	Organic acids	有机酸	Organic acids	有机酸	C14H14N2O4S	3	0.724	299-11-6 | 94845-69-9	290.95	1491.52	1275.9	172.91	103.63	146.9	1.25722	0.140209	0.303156	7.22268	2.85253	up	C00200	-
MW0009758	Sotalol	索他洛尔	Benzene and substituted derivatives	苯及其衍生物	Benzene and substituted derivatives	苯及其衍生物	C12H20N2O3S	3	0.7219	3930-20-9	4358.7	3933.14	2863.23	1075.16	857.32	1955.16	1.29728	0.0142804	0.120256	2.86937	1.52073	up	C07309	-
MEDP0065	N-Acetyl-L-glutamic acid	N-乙酰-L-谷氨酸	Amino acids and derivatives	氨基酸及其衍生物	Amino acids and derivatives	氨基酸及其衍生物	C7H11NO5	3	0.721	1188-37-0	22759.9	34878.7	36341.1	14551.2	10468.9	18396.9	1.27394	0.0397392	0.17084	2.16459	1.11409	up	C00624	ko00220,ko00470,ko01100,ko01110,ko01210,ko01230
MW0004453	1,2-Benzenedicarboxylic acid, 4,4'-oxybis-	1,2-苯二甲酸, 4,4'-oxybis-	Benzene and substituted derivatives	苯及其衍生物	Benzene and substituted derivatives	苯及其衍生物	C16H10O9	3	0.7208	7717-76-2	393.62	7262.25	8791.59	16219.8	25863.9	36085.9	1.03833	0.0521528	0.191902	0.210407	-2.24874	down	-	-
MEDN0698	1-Naphthol	1-萘酚	Phenolic acids	酚酸类	Phenolic acids	酚酸类	C10H8O	3	0.7194	90-15-3	3342.7	3363.29	2671.92	35829.6	61702.6	14953.2	1.37311	0.126101	0.287306	0.0833701	-3.58433	down	C11714	-
MEDP0689	Tranexamic Acid	反式-4-(氨甲基)环己烷甲酸	Organic acids	有机酸	Organic acids	有机酸	C8H15NO2	3	0.7194	1197-18-8	1728.49	1485.66	668.73	5816.57	5951.48	2607.49	1.25294	0.0751877	0.224499	0.270103	-1.88842	down	-	-
MW0104381	N-(Carboxymethyl)-N-(phosphonomethyl)glycine	N-(羧甲基)-N-(膦酰基甲基)甘氨酸	Benzene and substituted derivatives	苯及其衍生物	Benzene and substituted derivatives	苯及其衍生物	C5H10NO7P	3	0.719	5994-61-6	3458.98	6560.8	5826.25	494.07	910.6	1552.2	1.33448	0.0339888	0.16011	5.35906	2.42198	up	-	-
MEDP0821	6-Methylnicotinamide	6-甲基烟酰胺	Alkaloids	生物碱	Pyridine alkaloids	吡啶类生物碱	C7H8N2O	3	0.7178	6960-22-1	226600	259405	297111	35026	79448.3	109190	1.29369	0.00330058	0.0850936	3.5013	1.80789	up	-	-
MEDN1709	2-Octanamidoacetic acid	辛酰甘氨酸	Amino acids and derivatives	氨基酸及其衍生物	Amino acids and derivatives	氨基酸及其衍生物	C10H19NO3	3	0.7172	14246-53-8	13763.8	16150	14504.1	51382.6	90250.2	49909.4	1.4067	0.065092	0.211191	0.231896	-2.10845	down	-	-
MEDN1046	Pyrocatechol	邻苯二酚;儿茶酚	Phenolic acids	酚酸类	Phenolic acids	酚酸类	C6H6O2	3	0.7168	120-80-9	95378.1	124578	111973	44600	41844.8	48359	1.43397	0.0128998	0.115327	2.46231	1.30001	up	C15571	-
MEDN0682	Octadecanamide	硬脂酰胺	Lipids	脂质	Free fatty acids	游离脂肪酸	C18H37NO	3	0.7168	124-26-5	43191.7	52071.6	54325.4	532.55	648.95	645.96	1.45854	0.00472291	0.0969504	81.8561	6.35502	up	C13846	-
MW0147243	Cassine	卡辛	Alkaloids	生物碱	Alkaloids	生物碱	C18H35NO2	3	0.7157	5227-24-7	4999.55	1910.94	2021.79	81047.2	91290.7	85194.3	1.43976	0.00044731	0.0659656	0.0346841	-4.84958	down	-	-
MW0127231	2-Methyl-6-(furfurylthio)pyrazine	2-甲基-6-(糠硫基)吡嗪	Heterocyclic compounds	杂环化合物	Heterocyclic compounds	杂环化合物	C10H10N2OS	3	0.7129	59021-05-5	42278.8	29989.5	23901.9	129089	132766	122274	1.42515	0.000432393	0.0659656	0.250359	-1.99793	down	-	-
MW0117913	5-methyl-4-(4-methylphenyl)-4H-1,2,4-triazole-3-thiol	5-甲基-4-(4-甲基苯基)-4H-1,2,4-三唑-3-硫醇	Others	其它类	Ketone compounds	酮类化合物	C10H11N3S	3	0.712	149747-23-9	14199.7	14632.9	13047.1	8498.17	5286.76	6948.82	1.36023	0.006755	0.101929	2.01988	1.01427	up	-	-
MW0157111	Sodium salicylate	水杨酸钠	Benzene and substituted derivatives	苯及其衍生物	Benzene and substituted derivatives	苯及其衍生物	C7H5NaO3	3	0.7117	54-21-7 | 90218-97-6	15618.1	17561.5	17478.3	11358.3	7861.84	6075.2	1.30787	0.0201187	0.137686	2.00266	1.00192	up	C07587	-
MW0137820	Cyanidin 3-rhamnoside 5-glucoside	花青素 3-鼠李糖苷 5-葡萄糖苷	Flavonoids	黄酮	Anthocyanidins	花青素	C27H31O15+	3	0.7105	53859-12-4	1.85193e+06	2.52074e+06	2.26913e+06	475509	545492	985302	1.35859	0.00406178	0.091935	3.31047	1.72703	up	-	-
MW0001955	2-(Morpholin-4-yl)ethyl 2,4-dihydroxybenzoate	2-(吗啉-4-基)2,4-二羟基苯甲酸乙酯	Benzene and substituted derivatives	苯及其衍生物	Benzene and substituted derivatives	苯及其衍生物	C13H17NO5	3	0.7097	84139-72-0	7619.1	6919.68	5680.43	21300.3	23539.1	27498.5	1.44145	0.00650204	0.101413	0.279511	-1.83903	down	-	-
MW0148557	(Carboxymethyl)(dimethyl)sulfonium	乙酸二甲酯	Others	其它类	Lactones	内酯类化合物	C4H9O2S+	3	0.7096	24220-08-4	16327.6	22718.7	27321.9	6512.99	10692.8	6586.79	1.34519	0.0317596	0.156604	2.78945	1.47998	up	C03392	-
MW0117682	2-Butylsulfanyl-1H-quinazolin-4-one	2-丁基硫烷基-1H-喹唑啉-4-one	Others	其它类	Ketone compounds	酮类化合物	C12H14N2OS	3	0.709	6956-60-1	7867.12	10175.4	9383.55	410.94	2776.7	4832.63	1.06748	0.0202117	0.137713	3.41959	1.77383	up	-	-
MEDL00860	D-Ornithine	D-鸟氨酸	Amino acids and derivatives	氨基酸及其衍生物	Amino acids and derivatives	氨基酸及其衍生物	C5H12N2O2	3	0.7074	348-66-3	2743.92	3957.63	3979.49	47138.3	15723.6	17487.8	1.35293	0.150096	0.313997	0.132932	-2.91124	down	C00515	ko00470,ko01100,ko01110
MW0011239	Dihydroroseoside	二氢蔷薇苷	Others	其它类	Ketone compounds	酮类化合物	C19H32O8	3	0.7071	142235-28-7	4184.96	13322.1	7005	53205.5	47798.2	32825.9	1.34626	0.0149605	0.121744	0.183159	-2.44883	down	-	-
MEDP1096	1,2-Dilauroyl-sn-glycero-3-phosphocholine	PC(12:0/12:0)	GP	甘油磷脂类	PC	磷脂酰胆碱	C32H64NO8P	3	0.7052	18194-25-7 | 127641-86-5	144486	148017	136720	17740.2	5464.88	15933.4	1.39959	1.61635e-05	0.03413	10.9668	3.45506	up	-	-
MEDP1869	Histidylleucine	组氨酸亮氨酸; N-L-组氨酸-L-亮氨酸	Amino acids and derivatives	氨基酸及其衍生物	Amino acids and derivatives	氨基酸及其衍生物	C12H20N4O3	3	0.704	7763-65-7	5293.39	2774.96	4905.47	34708.1	23588.2	49742.3	1.4061	0.051325	0.190214	0.120085	-3.05787	down	C05010	-
MEDL01873	[8]-Gingerdione	[8]-姜辣二酮	Phenolic acids	酚酸类	Phenolic acids	酚酸类	C19H28O4	3	0.7019	77334-06-6	88491.1	78302.7	59122.1	14476.4	12349.5	53447.8	1.15074	0.0465724	0.181137	2.81432	1.49279	up	-	-
MW0104832	N-(2-oxo-2-piperidin-1-ylethyl)benzenesulfonamide	N-(2-氧代-2-哌啶-1-基乙基)苯磺酰胺	Benzene and substituted derivatives	苯及其衍生物	Benzene and substituted derivatives	苯及其衍生物	C13H18N2O3S	3	0.7017	518359-61-0	4825.6	4660.78	3547.5	12854	10493.6	10370.3	1.41803	0.00505222	0.0973674	0.386557	-1.37125	down	-	-
MW0146675	beta-Hydroxyacteoside	β-羟基毛蕊糖苷	Phenolic acids	酚酸类	Phenolic acids	酚酸类	C29H36O16	3	0.7005	95587-86-3	2087.77	1256.52	9523.53	21998.1	23356.1	9831.51	1.15235	0.0606275	0.205302	0.233173	-2.10053	down	C17528	-
MW0142806	3'-Amino-3'-deoxyadenosine 5'-(dihydrogen phosphate)	3′-氨基-3′-脱氧-AMP	Nucleotides and derivatives	核苷酸及其衍生物	Nucleotides and derivatives	核苷酸及其衍生物	C10H15N6O6P	3	0.6993	4360-05-8	8487.07	11637.5	18646.7	1891.81	1321.56	1173.68	1.42216	0.0615511	0.206881	8.83764	3.14366	up	C07026	ko01100,ko01110
MW0054194	Kanokoside B	Kanokoside B	Terpenoids	萜类	Terpene	萜类	C21H34O12	3	0.6991	126006-65-3	43727	23056.1	34689.5	7578.3	17015.6	17876.8	1.16419	0.0608401	0.205457	2.38924	1.25655	up	C17429	-
MW0137590	Cardamonin	豆蔻明	Flavonoids	黄酮	Chalcones	查耳酮	C16H14O4	3	0.6984	19309-14-9 | 18956-16-6	4.20033e+06	2.44146e+06	2.85689e+06	204390	363166	1.91282e+06	1.14365	0.0371345	0.166464	3.82954	1.93717	up	-	-
MW0123213	Carbadox	卡巴多	Alkaloids	生物碱	Alkaloids	生物碱	C11H10N4O4	3	0.6983	6804-07-5	237625	174603	187270	90754.7	92431.4	100694	1.40559	0.0292747	0.153659	2.1118	1.07847	up	-	-
MEDP0295	4-Acetamidobutanoic acid	4-乙酰氨基丁酸	Organic acids	有机酸	Organic acids	有机酸	C6H11NO3	3	0.6972	3025-96-5	907.97	1490.18	1065.99	5950.52	3319.82	16138.2	1.2869	0.201982	0.366952	0.136338	-2.87475	down	C02946	ko00330,ko01100
MW0120669	3,4-Dihydro-4-phenyl-1,3,5-triazino[1,2-a]benzimidazol-2-amine	3,4-二氢-4-苯基-1,3,5-三嗪[1,2-a]苯并咪唑-2-胺	Benzene and substituted derivatives	苯及其衍生物	Benzene and substituted derivatives	苯及其衍生物	C15H13N5	3	0.6965	26958-67-8	1236.34	269.78	155.5	1049.1	2855.61	1258.59	1.06369	0.169918	0.335045	0.321814	-1.6357	down	-	-
MEDL00096	2-Methylglutaric acid	2-甲基戊二酸	Organic acids	有机酸	Organic acids	有机酸	C6H10O4	3	0.6963	617-62-9	27584	37097.5	36504.1	16552.3	17299	13816.2	1.39766	0.0195326	0.135704	2.12274	1.08593	up	-	-
MW0015536	acetyl Podocarpic acid anhydride	乙酰罗汉果酸酐	Others	其它类	Lactones	内酯类化合物	C38H46O7	3	0.6957	344327-48-6	29760.6	20742.6	20071	39788.3	52965	64763.6	1.32928	0.0406088	0.172392	0.448042	-1.15829	down	-	-
MW0114099	Citrusin F	柑橘素 F	Heterocyclic compounds	杂环化合物	Heterocyclic compounds	杂环化合物	C22H32O14	3	0.6953	134860-04-1	6336.52	3722.82	2028.83	20006.4	18777	11342	1.31166	0.0269755	0.149721	0.241159	-2.05194	down	-	-
ZINC34075172	2,4-Octadienamide, N-(2-methylpropyl)-, (E,E)-	N-异丁基-2E,4E-十八酰胺	Alkaloids	生物碱	Alkaloids	生物碱	C12H21NO	3	0.6937	23512-47-2	8639.13	17328.8	14568.6	67432.5	59343.5	62693.8	1.40525	0.000146547	0.0656186	0.213947	-2.22467	down	-	-
MEDP0430	2-Aminoadipic acid	DL-2-氨基己二酸	Alkaloids	生物碱	Alkaloids	生物碱	C6H11NO4	3	0.6912	542-32-5	36620.9	1683.34	19159.3	77915.1	62463.8	69218.3	1.03524	0.023209	0.143893	0.274162	-1.8669	down	C00956	ko00300,ko00310,ko01100,ko01110,ko01210,ko01230
MW0127959	1-Cinnamoylpiperidine	1-肉桂酰基哌啶	Alkaloids	生物碱	Piperidine alkaloids	哌啶类生物碱	C14H17NO	3	0.6908	5422-81-1	10814	22055.2	22370.5	6037.68	7132.95	6431.61	1.31487	0.0878949	0.241233	2.81803	1.49469	up	-	-
MW0054635	Mabioside D	马比奥苷D	Terpenoids	萜类	Triterpene	三萜	C42H70O14	3	0.6901	156980-55-1	29844.1	73186.2	57242.8	28926	16598.3	14883	1.20342	0.106728	0.265437	2.65321	1.40774	up	-	-
MW0008994	1-Cyclohexyl-3-phenylthiourea	1-环己基-3-苯基硫脲	Benzene and substituted derivatives	苯及其衍生物	Benzene and substituted derivatives	苯及其衍生物	C13H18N2S	3	0.6874	722-03-2 | 15093-57-9	3143.42	3309.63	3236.8	16669	12325.2	10675.8	1.43114	0.0304557	0.154526	0.244262	-2.0335	down	-	-
MW0012407	15(S)-Hede	15(S)-Hede	Lipids	脂质	Free fatty acids	游离脂肪酸	C20H36O3	3	0.6874	92693-04-4	7975.02	9875.13	7701.31	15915.7	71506	35797.9	1.24178	0.183041	0.348221	0.207365	-2.26975	down	-	-
MW0015599	Agavoside B	龙舌兰苷B	Steroids	甾体	Steroidal saponins	甾体皂苷	C39H62O14	3	0.6867	56857-66-0	26806.9	21346.3	14123.2	11903	10926.7	4444.15	1.11937	0.0658261	0.212205	2.28338	1.19117	up	-	-
MW0055291	Geraniol	橙花醇	Terpenoids	萜类	Terpene	萜类	C10H18O	3	0.686	106-25-2	4888.86	7742	13362.7	16511.2	19225.2	36632.2	1.17506	0.120015	0.278995	0.359183	-1.47721	down	C09871	-
MEDN0689	2,5-Furandicarboxylic acid	2，5-呋喃二羧酸酯；呋喃-2，5-二羧酸酯	Others	其它类	Lactones	内酯类化合物	C6H4O5	3	0.6854	3238-40-2	37051.1	25738.3	33016	21914.8	6590.9	16821.5	1.09381	0.0441676	0.180086	2.11364	1.07973	up	C20450	-
MW0007780	Methyl 2-hydroxybenzoate	2-羟基苯甲酸甲酯	Benzene and substituted derivatives	苯及其衍生物	Benzene and substituted derivatives	苯及其衍生物	C8H8O3	3	0.6851	119-36-8	153158	96790	105912	324737	305440	284462	1.40076	0.00164171	0.0792302	0.389071	-1.36189	down	C12305	-
MW0114715	Leiocarposide	光果糖苷	Benzene and substituted derivatives	苯及其衍生物	Benzene and substituted derivatives	苯及其衍生物	C27H34O16	3	0.6836	71953-77-0	198153	177750	123636	691605	712527	355404	1.33979	0.0634351	0.208751	0.283904	-1.81653	down	-	-
MW0000024	Gnoscopine	诺斯卡品	Alkaloids	生物碱	Isoquinoline alkaloids	异喹啉类生物碱	C22H23NO7	3	0.6828	6035-40-1	137183	182745	198908	6771.67	3688.9	3807.19	1.45114	0.0116726	0.112902	36.3642	5.18445	up	-	-
MW0150666	Guattegaumerine	N，N′-二甲基吲哚胺	Heterocyclic compounds	杂环化合物	Heterocyclic compounds	杂环化合物	C36H40N2O6	3	0.6822	21446-35-5	18416	32984.2	23390.8	56891.3	49166.9	65511.7	1.33274	0.0073414	0.10294	0.435922	-1.19786	down	C06511	ko00950
MW0156453	Ryanodine	瑞安定	Terpenoids	萜类	Ditepenoids	二萜	C25H35NO9	3	0.6808	15662-33-6	12635.4	52850	82597.2	178781	98621.3	261908	1.09547	0.0933382	0.246353	0.274578	-1.86471	down	-	-
MW0104392	beta-D-Glucose pentaacetate	β-D-葡萄糖五乙酸酯	Others	其它类	Ketone compounds	酮类化合物	C16H22O11	3	0.6797	3891-59-6	4120.93	1813.59	3414.91	15092.4	16340.9	21244.4	1.39924	0.00955053	0.109689	0.177484	-2.49424	down	-	-
MW0007582	Menadione	维生素K3	Others	其它类	Vitamin	维生素	C11H8O2	3	0.6795	58-27-5	8257.67	19014.8	17376.6	35232.6	41668.1	24446.4	1.17602	0.0424852	0.175409	0.440557	-1.1826	down	C05377	-
MW0169215	Geniposide	京尼平苷	Terpenoids	萜类	Monoterpenoids	倍萜	C17H24O10	3	0.6786	24512-63-8 | 169799-41-1 | 27745-20-6	43494.2	26187.5	27015.6	74875.6	87298.1	66799.7	1.35618	0.0058417	0.100764	0.422308	-1.24363	down	C09781	-
MW0121600	5-Methoxytryptophol	5-甲氧色氨酸	Amino acids and derivatives	氨基酸及其衍生物	Amino acids and derivatives	氨基酸及其衍生物	C11H13NO2	3	0.6771	712-09-4	28815.6	33692.9	37308.9	10330.5	14679.5	12005.9	1.41614	0.0048484	0.0973674	2.69661	1.43115	up	-	-
MW0112967	4-(Methylnitrosamino)-1-(3-pyridyl)-1-butanone	4-(甲基亚硝基氨基)-1-(3-吡啶基)-1-丁酮	Others	其它类	Ketone compounds	酮类化合物	C10H13N3O2	3	0.6761	64091-91-4	3096.14	6689.73	3466.61	13430	10203.9	5548.78	1.07682	0.131286	0.292052	0.454122	-1.13885	down	C16453	-
MW0003896	3-Butynyl p-toluenesulfonate	3-对甲苯磺酸丁炔酯	Benzene and substituted derivatives	苯及其衍生物	Benzene and substituted derivatives	苯及其衍生物	C11H12O3S	3	0.6758	23418-85-1	15548.7	5485.27	12831.9	94076.5	74074.1	83787.4	1.39315	0.00151759	0.0757164	0.134421	-2.89517	down	-	-
MW0055314	CID 14021529	尼罗河金银楝素	Terpenoids	萜类	Triterpene	三萜	C30H48O3	3	0.6758	115404-57-4	33971.9	38114.8	34219.7	45096.5	368598	155856	1.09224	0.245293	0.41	0.18665	-2.4216	down	-	-
MW0158046	Trichotomine	曲索明	Benzene and substituted derivatives	苯及其衍生物	Benzene and substituted derivatives	苯及其衍生物	C30H20N4O6	3	0.6756	53472-14-3	11878.3	3076.91	2812.05	16629.1	8505	15144.8	1.03816	0.127936	0.288446	0.441106	-1.1808	down	C09247	-
MW0122710	9-Methyluric acid	9-甲基尿酸	Organic acids	有机酸	Organic acids	有机酸	C6H6N4O3	3	0.6726	55441-71-9	45050.8	61850	67686.7	20444.8	22518.8	17868.2	1.41491	0.0267703	0.148938	2.87001	1.52105	up	-	-
MEDL01869	Methylgingerol	甲基-[6]-姜酚	Phenolic acids	酚酸类	Phenolic acids	酚酸类	C18H28O4	3	0.6724	61914-52-1	6648.3	4653.79	378.99	50181.2	42245.1	52774.9	1.26697	0.000848375	0.0686411	0.0804476	-3.63581	down	-	-
MW0002202	2,4,6-Trihydroxybenzophenone	2，4，6-三羟基二苯甲酮	Others	其它类	Others	其它	C13H10O4	3	0.6704	3555-86-0	29638.6	19703.4	21778.9	2102.35	3788.76	17427.6	1.1009	0.0604777	0.205059	3.04995	1.60879	up	C06356	-
MW0157913	Thr-Trp	苏氨酸-色氨酸	Amino acids and derivatives	氨基酸及其衍生物	Amino acids and derivatives	氨基酸及其衍生物	C15H19N3O4	3	0.6698	186761-42-2	6424.78	6263.02	14984.8	22656.2	21194	30248.4	1.25554	0.0183579	0.132268	0.373457	-1.42099	down	-	-
MW0000531	(10S,11S)-Pterosin C	蕨素 C	Terpenoids	萜类	Sesquiterpenoids	倍半萜	C14H18O3	3	0.6694	35938-43-3	30333.3	23455.5	23479.3	9908.68	13781.7	12733	1.37134	0.0135083	0.11704	2.12139	1.08501	up	-	-
MEDL02737	Goyaglycoside f	Goyaglycoside F	Terpenoids	萜类	Triterpene Saponin	三萜皂苷	C42H68O13	3	0.6663	333333-13-4	102842	134595	146985	58551.6	40088.3	48146.2	1.39783	0.0157641	0.123348	2.61893	1.38898	up	-	-
MW0116071	gamma-Nonanolactone	γ-壬内酯	Heterocyclic compounds	杂环化合物	Heterocyclic compounds	杂环化合物	C9H16O2	3	0.6657	63357-97-1	4915.09	3748.12	11037.7	70908.2	40770	13549.5	1.2032	0.16547	0.329944	0.15732	-2.66822	down	C08501	-
MEDL01838	Nonivamide	壬酰香草胺	Alkaloids	生物碱	Phenolamine	酚胺	C17H27NO3	3	0.6646	2444-46-4	26910.5	28257.8	16366	39776.7	46464.7	65130.7	1.26308	0.0533035	0.193485	0.472572	-1.08139	down	-	-
MW0009415	Phenylacetic acid	苯乙酸	Organic acids	有机酸	Organic acids	有机酸	C8H8O2	3	0.6641	103-82-2	679670	934908	789362	363256	443472	351516	1.39097	0.0192968	0.135043	2.0755	1.05346	up	C07086	ko00360,ko01100
MEDP0540	Dihydrobiopterin	7,8-二氢-L-生物蝶呤	Heterocyclic compounds	杂环化合物	Pteridines and derivatives	蝶啶及其衍生物	C9H13N5O3	3	0.6629	6779-87-9	27133.6	39922.1	44360.9	14016.4	9311.28	11076.6	1.39489	0.0312099	0.155594	3.23845	1.6953	up	C02953	ko00790,ko01100,ko01240
MEDP2301	Esculentoside A	商陆皂苷 A	Terpenoids	萜类	Triterpene Saponin	三萜皂苷	C42H66O16	3	0.6628	65497-07-6	66759.8	116564	142537	29213	22619	40558.2	1.33427	0.0658567	0.212205	3.527	1.81844	up	-	-
MW0169580	N-undecanoyl-L-Homoserine lactone	N-十一烷酰基-L-高丝氨酸内酯	Others	其它类	Lactones	内酯类化合物	C15H27NO3	3	0.6623	216596-71-3	48182.5	39698.2	47654.2	6516.57	9259.19	34978.1	1.12051	0.0786591	0.229482	2.67044	1.41708	up	-	-
ZINC777954	Praeruptorin D	白花前胡素D	Lignans and Coumarins	木脂素和香豆素	Coumarins	香豆素	C24H26O7	3	0.6614	73069-28-0 | 81740-07-0	43228.9	61628	60625.2	16955.4	17289.3	12119.3	1.41872	0.016222	0.12566	3.56919	1.8356	up	-	-
MEDP0365	cotinine N-oxide	可替宁 N-氧化物	Alkaloids	生物碱	Pyridine alkaloids	吡啶类生物碱	C10H12N2O2	3	0.6613	36508-80-2	22422	32596.4	24282	12494.1	14816.5	11348	1.36204	0.0387666	0.169057	2.0513	1.03654	up	-	-
MEDP0664	Tyrosine methylester	L-酪氨酸甲酯	Amino acids and derivatives	氨基酸及其衍生物	Amino acids and derivatives	氨基酸及其衍生物	C10H13NO3	3	0.6604	1080-06-4	1993.85	3769.46	3227.01	10348.1	22954.2	11520.9	1.35373	0.0946859	0.248076	0.200573	-2.3178	down	C03404	-
MEDP0276	Indole-3-carboxaldehyde	吲哚-3-甲醛	Alkaloids	生物碱	Plumerane	吲哚类生物碱	C9H7NO	3	0.6594	487-89-8	28778	9285.29	9006.19	31930.4	42644.7	45129	1.18934	0.0444899	0.180429	0.393215	-1.34661	down	C08493	-
MEDP2100	(1H-Indol-4-yl)methanamine	4-氨基甲基吲哚	Alkaloids	生物碱	Plumerane	吲哚类生物碱	C9H10N2	3	0.6588	3468-18-6	31924	175984	42270.4	198819	144869	376009	1.0643	0.14593	0.309732	0.347616	-1.52443	down	-	-
MW0141385	13-Hydroxy-6,9,11-octadecatrienoic acid	13-羟基-6,9,11-十八碳三烯酸	Lipids	脂质	Free fatty acids	游离脂肪酸	C18H30O3	3	0.6575	74784-20-6	9259.48	1359.45	15159.9	104453	65472.7	24228.3	1.15757	0.13251	0.293484	0.132775	-2.91295	down	-	-
MW0122950	Asticolorin C	Asticolorin C	Heterocyclic compounds	杂环化合物	Heterocyclic compounds	杂环化合物	C33H28O9	3	0.6572	93395-44-9	956.86	608	706.43	3076.68	2952.2	1643.71	1.35257	0.0529014	0.19325	0.296027	-1.7562	down	-	-
MW0014020	3-Deoxyfructose	3-脱氧果糖	Organic acids	有机酸	Organic acids	有机酸	C6H12O5	3	0.6571	6196-57-2	13541.7	17187	32079.4	11754.4	10152.9	6576.38	1.14067	0.174378	0.33906	2.20506	1.14081	up	-	-
MW0114976	Natamycin	游霉素	Others	其它类	Lactones	内酯类化合物	C33H47NO13	3	0.6569	7681-93-8	18214.7	28108.4	11873.3	5498.9	4406.4	2837.13	1.34373	0.0813272	0.232979	4.56714	2.19129	up	-	-
MEDL01926	Albanin A	Albanin A	Flavonoids	黄酮	Flavones	黄酮	C20H18O6	3	0.6562	73343-42-7	35173.3	10995	3192.64	72470.7	55102.1	25151.9	1.02331	0.118605	0.277294	0.323202	-1.62949	down	-	-
MW0148318	Desglucomusennin	去葡萄糖素	Organic acids	有机酸	Organic acids	有机酸	C45H72O16	3	0.6555	25314-45-8	47612.2	57269.3	45142.2	26055.2	14549.3	34336.2	1.19313	0.0281513	0.151946	2.0019	1.00137	up	C08940	-
MEDN1410	N-Palmitoylglycine	N-棕榈酰甘氨酸	Amino acids and derivatives	氨基酸及其衍生物	Amino acids and derivatives	氨基酸及其衍生物	C18H35NO3	3	0.6551	158305-64-7	55252.4	67463.3	53128.1	1591.16	1780.88	1317.2	1.4568	0.00603732	0.101413	37.4994	5.2288	up	-	-
MW0003537	3-(Diphenylphosphino)-1-propylamine	3-(二苯基膦)-1-丙胺	Benzene and substituted derivatives	苯及其衍生物	Benzene and substituted derivatives	苯及其衍生物	C15H18NP	3	0.655	16605-03-1	6651.05	7855.57	6751.09	30727.4	15835.8	12503.4	1.25661	0.152777	0.317032	0.359894	-1.47436	down	-	-
MW0126293	Pyrazinamide	吡嗪酰胺	Organic acids	有机酸	Organic acids	有机酸	C5H5N3O	3	0.6539	98-96-4	712.62	2730.36	2412.24	9516.58	17326.4	9306.28	1.30352	0.0551991	0.196005	0.161973	-2.62617	down	C01956	-
MEDN0658	Hexadecanedioic acid	十六烷二酸	Lipids	脂质	Free fatty acids	游离脂肪酸	C16H30O4	3	0.6525	505-54-4	28833.9	48264.8	27019	90156.6	148378	107347	1.36466	0.0299205	0.153711	0.301021	-1.73206	down	C19615	ko00073,ko01100
MEDP0054	Glutamine	L-谷氨酰胺	Amino acids and derivatives	氨基酸及其衍生物	Amino acids and derivatives	氨基酸及其衍生物	C5H10N2O3	3	0.6511	56-85-9	14462.6	12676	31121.2	66251.8	63237.9	59345.2	1.32386	0.0110693	0.112635	0.308522	-1.69655	down	C00064	ko00220,ko00230,ko00240,ko00250,ko00470,ko00630,ko00750,ko00910,ko00970,ko01100,ko01230,ko01232,ko01240,ko02010
MW0002730	2-Aminobenzenecarbothioamide	2-氨基苯硫代酰胺	Benzene and substituted derivatives	苯及其衍生物	Benzene and substituted derivatives	苯及其衍生物	C7H8N2S	3	0.6483	2454-39-9	1242.71	968.38	1563.6	12784.3	5688.01	6541.23	1.38908	0.0861384	0.239187	0.150906	-2.72828	down	-	-
MW0152642	Levothroid	左甲状腺素	Organic acids	有机酸	Organic acids	有机酸	C15H10I4NNaO4	3	0.648	55-03-8 | 25416-65-3 | 50809-32-0	107300	64182.1	137908	51996.3	36967.5	51121	1.2216	0.112073	0.271351	2.20859	1.14313	up	C08212	-
MW0159352	Vindoline	文多灵碱	Alkaloids	生物碱	Plumerane	吲哚类生物碱	C25H32N2O6	3	0.6471	2182-14-1 | 57794-53-3	170.86	3221.5	243.43	6821.75	19929.6	18878.9	1.25264	0.0724045	0.221316	0.0796794	-3.64965	down	-	-
MW0126471	8-Demethyl-8-(dimethylamino)riboflavin	玫瑰黄素	Heterocyclic compounds	杂环化合物	Heterocyclic compounds	杂环化合物	C18H23N5O6	3	0.6471	51093-55-1	169840	192259	191351	76193.8	78494.6	115339	1.36285	0.00618521	0.101413	2.04961	1.03535	up	C21647	ko01100,ko01110
MW0124073	Eucatropine	桉树素	Heterocyclic compounds	杂环化合物	Heterocyclic compounds	杂环化合物	C17H25NO3	3	0.6465	100-91-4	2.35382e+06	1.69573e+06	2.12706e+06	169352	4360.9	199529	1.20603	0.0058345	0.100764	16.5485	4.04863	up	-	-
MW0061026	Pentadecanal	十五烷醛	FA	脂肪酰类	Others	其它	C15H30O	3	0.6457	2765-11-9	24542.6	27748.5	34971.6	285494	161979	70009.3	1.28949	0.148106	0.31177	0.168629	-2.56807	down	C01948	-
MW0110277	Kyotorphin	L-酪氨酰-L-精氨酸	Amino acids and derivatives	氨基酸及其衍生物	Amino acids and derivatives	氨基酸及其衍生物	C15H23N5O4	3	0.6456	70904-56-2	127708	167458	78057.7	280170	355003	304650	1.32138	0.00551446	0.099615	0.397121	-1.33235	down	C02993	-
MW0008850	N-Arachidonoyl dopamine	花生四烯酸多巴胺	Phenolic acids	酚酸类	Phenolic acids	酚酸类	C28H41NO3	3	0.6449	199875-69-9	142655	140534	193005	67673.8	70280.5	60144.4	1.41752	0.0293686	0.153711	2.40383	1.26533	up	-	-
MW0126905	Uncarine A	钩藤碱 A	Alkaloids	生物碱	Plumerane	吲哚类生物碱	C21H24N2O4	3	0.6445	6899-73-6	13793.3	11409.5	7458.21	28985.8	37090.6	26472.1	1.36663	0.0105518	0.112223	0.352908	-1.50264	down	C17593	-
MW0007219	Frangulin A	弗兰古林A	Benzene and substituted derivatives	苯及其衍生物	Benzene and substituted derivatives	苯及其衍生物	C21H20O9	3	0.6441	521-62-0	17903.1	23017.6	22490.5	11054.1	10617.3	8959.33	1.4101	0.0123538	0.114817	2.07018	1.04976	up	-	-
MW0106579	Edetic acid	乙二胺四乙酸	Organic acids	有机酸	Organic acids	有机酸	C10H16N2O8	3	0.6438	62-33-9	4298.08	32167	22114.2	64017.1	89255.8	35827.6	1.04071	0.0872661	0.240305	0.309779	-1.69069	down	C00284	-
MW0145608	Arg-Phe	L-精氨酰-L-苯丙氨酸	Amino acids and derivatives	氨基酸及其衍生物	Amino acids and derivatives	氨基酸及其衍生物	C15H23N5O3	3	0.6438	2047-13-4	3199.81	2370.49	1016.13	17668.4	9675.41	13890.2	1.35938	0.030363	0.154477	0.159733	-2.64627	down	-	-
MW0052578	Eplerenone	依普利农	Others	其它类	Ketone compounds	酮类化合物	C24H30O6	3	0.6425	107724-20-9	477041	558563	470044	185629	233976	202177	1.4304	0.0028792	0.0850936	2.4215	1.2759	up	C12512	-
MW0153825	Methyl-2-alpha-L-fucopyranosyl-beta-D-galactoside	甲基-2-α-L-呋喃果糖基-β-D-半乳糖苷	Others	其它类	Saccharides	糖类	C13H24O10	3	0.642	37288-45-2	24119.9	5439	12897.3	770.89	1577.56	1753.35	1.32411	0.142291	0.304808	10.3506	3.37165	up	C04698	-
MW0114142	Cycloxydim	环木聚糖	Others	其它类	Ketone compounds	酮类化合物	C17H27NO3S	3	0.6406	101205-02-1 | 99434-58-9	17794	34872.9	21739.2	9837.98	13079.8	13434.5	1.22222	0.127313	0.288302	2.04681	1.03338	up	-	-
MW0115078	Paederoside	鸡矢藤苷	Terpenoids	萜类	Monoterpenoids	倍萜	C18H22O11S	3	0.6387	20547-45-9	6167.54	5406.17	12092	24452.7	25302.8	22006.6	1.33278	0.00755146	0.10294	0.32978	-1.60042	down	C09795	-
MW0002600	N-(4-Hydroxy-3,5-dimethoxybenzoyl)glycine	2-{[羟基（4-羟基-3，5-二甲氧基苯基）亚甲基]氨基}乙酸	Benzene and substituted derivatives	苯及其衍生物	Benzene and substituted derivatives	苯及其衍生物	C11H13NO6	3	0.63	62098-75-3	771.84	169.19	597.4	908.91	2383.16	1624.02	1.11144	0.102629	0.258288	0.312938	-1.67605	down	-	-
MEDL02640	Chrysosplenol D	猫眼草酚 D	Flavonoids	黄酮	Flavones	黄酮	C18H16O8	3	0.6299	14965-20-9	6682.63	17183.6	17488.7	29428.2	48783.1	49299.8	1.24238	0.0292436	0.153659	0.324324	-1.62449	down	C04552	-
MEDN1569	Piperlongumine	荜茇酰胺	Alkaloids	生物碱	Pyridine alkaloids	吡啶类生物碱	C17H19NO5	3	0.6294	20069-09-4	124272	156928	196936	73141.9	75406.6	87133.7	1.35498	0.0561111	0.198231	2.02873	1.02058	up	C10166	-
MW0117846	1,2,3,4-Tetrahydro-2,3-dioxoquinoxaline-6-carboxylic acid	1,2,3,4-四氢-2,3-二氧喹喔啉-6-羧酸	Organic acids	有机酸	Organic acids	有机酸	C9H6N2O4	3	0.6277	14121-55-2	4801.27	7912.49	11166.2	2852.41	570.63	3743.32	1.09255	0.0743272	0.223222	3.33222	1.73649	up	-	-
MEDN0225	D-Xylose	D-木糖	Others	其它类	Saccharides	糖类	C5H10O5	3	0.6277	58-86-6	41723.4	72936.2	76662.9	27339.4	33300.5	30707.5	1.27338	0.091648	0.244683	2.09445	1.06657	up	C00181	ko00040,ko00520,ko01100,ko02010
MW0157915	Thr-Tyr	苏氨酸-酪氨酸	Amino acids and derivatives	氨基酸及其衍生物	Amino acids and derivatives	氨基酸及其衍生物	C13H18N2O5	3	0.6263	145295-02-9	9721.74	2822.33	2690.66	63408.5	40999.7	17872.6	1.29659	0.108964	0.267021	0.124588	-3.00476	down	-	-
MW0136735	6-Methoxyflavanone	6-甲氧基黄烷酮	Others	其它类	Ketone compounds	酮类化合物	C16H14O3	3	0.6259	3034-04-6	10824.5	20397.5	22341.4	7254.12	8404.61	9649.81	1.213	0.113131	0.272548	2.11642	1.08162	up	-	-
MW0105527	L-Alanyl-L-methionine	L-丙氨酰-L-蛋氨酸	Amino acids and derivatives	氨基酸及其衍生物	Amino acids and derivatives	氨基酸及其衍生物	C8H16N2O3S	3	0.6224	14486-05-6	3233.57	10511.7	6638.91	15221.2	81353.2	38846.8	1.21669	0.184664	0.350446	0.150524	-2.73193	down	-	-
MW0169779	Rifaximin (Xifaxan)	利福昔明（Xifaxan）	Benzene and substituted derivatives	苯及其衍生物	Benzene and substituted derivatives	苯及其衍生物	C43H51N3O11	3	0.6221	80621-81-4	47200.5	35941.8	29693.6	16844	12358.5	22391.4	1.27146	0.0372023	0.166464	2.187	1.12895	up	-	-
MW0011680	cis-4-Decen-1-ol	（Z)-4-癸烯-1-醇	Alcohol and amines	醇、胺类	Alcohols	醇类	C10H20O	3	0.6219	57074-37-0	17993.1	18594.1	10104.2	22524.3	172048	92639.1	1.14311	0.204134	0.369323	0.162568	-2.62088	down	-	-
MW0061830	Pinusolide	松内酯	Terpenoids	萜类	Ditepenoids	二萜	C21H30O4	3	0.6175	31685-80-0	39791.7	39704.6	41635.9	8447.56	10352.1	23213.5	1.28302	0.0277024	0.151014	2.8832	1.52767	up	-	-
ZINC28972272	Kadsulignan E	南五味子甲素	Benzene and substituted derivatives	苯及其衍生物	Benzene and substituted derivatives	苯及其衍生物	C31H30O11	3	0.6167	142674-80-4	1650.3	8272.51	6315.18	373.08	410.56	463.28	1.3495	0.125942	0.287209	13.0225	3.70293	up	-	-
ZINC14757232	Kaempferol 3,4',7-triacetate	山奈酚-3，4′，7-三乙酸酯	Flavonoids	黄酮	Flavonols	黄酮醇	C21H16O9	3	0.6162	143724-69-0	13187.2	26127.3	25789.4	8556.01	8505.24	10140.7	1.28029	0.0950468	0.2486	2.39335	1.25903	up	-	-
MEDP1217	3-Methyl-4-pentenoic acid	3-甲基-4-戊烯酸	Organic acids	有机酸	Organic acids	有机酸	C6H10O2	3	0.6136	1879-03-4	11994.5	15699.6	19161.3	47114.1	49944.1	59368.6	1.41251	0.00277103	0.0850936	0.299535	-1.7392	down	-	-
MW0152588	Leucomycin A13	亮霉素A13	Others	其它类	Lactones	内酯类化合物	C41H69NO14	3	0.6113	78897-52-6	363545	492994	441715	149541	226690	170175	1.37902	0.00820764	0.104228	2.37598	1.24853	up	C14063	-
MW0118114	2-((2-(4-Pyridyl)methyl)thio)benzimidazole	2-((2-(4-吡啶基)甲基)硫代)苯并咪唑	Benzene and substituted derivatives	苯及其衍生物	Benzene and substituted derivatives	苯及其衍生物	C13H11N3S	3	0.6098	23593-14-8	11403	10515.6	11184.8	6284.24	1975.35	3795.07	1.25561	0.0259444	0.148071	2.74611	1.45739	up	-	-
MW0000905	[12]-Gingerol	[12]-姜酚	Phenolic acids	酚酸类	Phenolic acids	酚酸类	C23H38O4	3	0.6094	104264-55-3	22562	34394.9	17751.4	7837.16	13047	15712.1	1.13326	0.107507	0.266328	2.04142	1.02957	up	-	-
MEDN0669	5-KETE	5-氧代-6E,8Z,11Z,14Z-二十碳四烯酸	Lipids	脂质	Free fatty acids	游离脂肪酸	C20H30O3	3	0.6088	126432-17-5	8058.15	15261.3	7263.33	68044	68755.2	43483.9	1.39527	0.0193364	0.135043	0.169638	-2.55947	down	C14732	ko00590,ko01100
MW0008806	N(4)-Acetylsulfadiazine	N-乙酰磺胺嘧啶	Benzene and substituted derivatives	苯及其衍生物	Benzene and substituted derivatives	苯及其衍生物	C12H12N4O3S	3	0.6073	127-74-2 | 5572-57-6	561.12	3995.73	3271.94	15053.4	8024.83	5727.29	1.06804	0.117186	0.276362	0.271781	-1.87949	down	-	-
MEDP1003	Benzeneethanamine, N-hydroxy-	羟苯乙胺	Benzene and substituted derivatives	苯及其衍生物	Benzene and substituted derivatives	苯及其衍生物	C8H11NO	3	0.606	3217-93-4	7185.69	8986.98	7809.72	19388.9	17122.2	12128.4	1.32686	0.0545864	0.195311	0.493064	-1.02015	down	-	-
MW0012774	1-Eicosanoyl-sn-glycero-3-phosphocholine	溶血磷脂酰胆碱 20:0	Lipids	脂质	LPC	溶血磷脂酰胆碱	C28H58NO7P	3	0.6053	108341-80-6	235773	884977	710965	217003	294968	184687	1.03133	0.187516	0.354629	2.62929	1.39467	up	C04230	ko00564
MW0139901	7-Hydroxycoumarinyl Arachidonate	伞形花生四烯酸	Others	其它类	Others	其它	C29H36O4	3	0.6023	161180-11-6	76755.2	123978	119950	37104.1	48903.9	44937.8	1.36015	0.0465084	0.181137	2.44897	1.29218	up	-	-
MW0148595	Discodermolide	Discodermolide	Alcohol and amines	醇、胺类	Amines	胺类	C33H55NO8	3	0.6	127943-53-7	7191.04	6082.53	2223.59	1842.88	1939.21	2337.08	1.06218	0.172279	0.337624	2.53256	1.3406	up	-	-
MEDL01831	n-cis-Feruloyltyramine	N-顺式阿魏酰酪胺	Alkaloids	生物碱	Phenolamine	酚胺	C18H19NO4	3	0.5989	80510-09-4	3322.71	13520	1363.96	98125.5	86683.5	12667.9	1.16461	0.152917	0.317181	0.0921965	-3.43914	down	-	-
MW0052467	N-[(E,2S,3R)-1,3-dihydroxyoctadec-4-en-2-yl]-12-[(4-nitro-2,1,3-benzoxadiazol-7-yl)amino]dodecanamide	N-[(E,2S,3R)-1,3-dihydroxyoctadec-4-en-2-yl]-12-[(4-nitro-2,1,3-benzoxadiazol-7-yl)amino]十二酰胺	Benzene and substituted derivatives	苯及其衍生物	Benzene and substituted derivatives	苯及其衍生物	C36H61N5O6	3	0.5971	202850-01-9	15945.3	20233.7	7020.32	29059.8	33651.8	34500.1	1.19503	0.0288961	0.15317	0.444383	-1.17012	down	-	-
MW0009275	Orteronel	奥特罗内尔	Benzene and substituted derivatives	苯及其衍生物	Benzene and substituted derivatives	苯及其衍生物	C18H17N3O2	3	0.597	566939-85-3	19695	33268.5	22429.3	9489.02	8449.81	10484	1.37633	0.0607992	0.205457	2.65255	1.40738	up	-	-
ZINC85488831	Gastrodioside	天麻醚苷	Phenolic acids	酚酸类	Phenolic acids	酚酸类	C20H24O8	3	0.5954	77162-64-2	67996.4	41082.6	54362.9	129871	89610.9	190182	1.26332	0.0982631	0.25269	0.398966	-1.32566	down	-	-
MW0127359	5-[(Pyridin-2-ylmethyl)thio]-1,3,4-thiadiazol-2-amine	5-[(Pyridin-2-ylmethyl)thio]-1,3,4-thiadiazol-2-amine	Alcohol and amines	醇、胺类	Amines	胺类	C8H8N4S2	3	0.5953	118159-54-9	1682.51	1658.82	1244.62	6232.83	5747.31	4770.63	1.43446	0.00641278	0.101413	0.273775	-1.86893	down	-	-
MW0008211	N-(3-hydroxyphenyl)-Arachidonoyl amide	N-(3-羟苯基)-花生酰胺	Benzene and substituted derivatives	苯及其衍生物	Benzene and substituted derivatives	苯及其衍生物	C26H37NO2	3	0.5945	183718-75-4	5708.78	10671.6	7144.99	83382	78263.1	41931.6	1.40741	0.0426047	0.175409	0.11556	-3.11329	down	-	-
MW0140172	1,2-Didecanoylglycerol	1,2-二癸酰基甘油	GL	甘油脂类	MG	单甘油酯	C23H44O5	3	0.5909	82950-64-9 | 17863-69-3	38743.9	26926	26675.7	142629	75526.9	92995.4	1.36687	0.0631921	0.208395	0.296787	-1.7525	down	-	-
MW0001307	5-[(4-Nitrophenyl)methylsulfanyl]-1,3,4-thiadiazol-2-amine	5-[(4-硝基苯基)甲基硫烷基]-1,3,4-噻二唑-2-胺	Benzene and substituted derivatives	苯及其衍生物	Benzene and substituted derivatives	苯及其衍生物	C9H8N4O2S2	3	0.588	72836-11-4	16965.9	39695.2	30149	13561.9	17315	8303.12	1.12313	0.124047	0.284376	2.21568	1.14775	up	-	-
MEDL01830	(1E)-1,7-bis(4-hydroxy-3-methoxyphenyl)hept-1-ene-3,5-dione	二氢姜黄素	Phenolic acids	酚酸类	Phenolic acids	酚酸类	C21H22O6	3	0.5864	76474-56-1	17662.4	18094.8	20535.6	1744.78	2192.97	18020.8	1.03564	0.162663	0.328076	2.56359	1.35817	up	-	-
MW0000816	1-Phenyl-3-[(S)-1-benzyl-2-hydroxyethyl]urea	1-苯基-3-[(S)-1-苄基-2-羟乙基]脲	Benzene and substituted derivatives	苯及其衍生物	Benzene and substituted derivatives	苯及其衍生物	C16H18N2O2	3	0.5863	223600-53-1	10293.8	19706.6	14716	249.79	3988.12	4311.38	1.09027	0.0303727	0.154477	5.23041	2.38692	up	-	-
MW0116586	1,2-benzisothiazol-3(2H)-one	1,2-苯并异噻唑-3(2H)-一	Benzene and substituted derivatives	苯及其衍生物	Benzene and substituted derivatives	苯及其衍生物	C7H5NOS	3	0.5858	2634-33-5	3440.46	7106.67	9783.44	2891.22	2908.91	3165.69	1.1263	0.175224	0.339085	2.26756	1.18114	up	-	-
MW0105756	Arginyl-Valine	精氨酰缬氨酸	Amino acids and derivatives	氨基酸及其衍生物	Amino acids and derivatives	氨基酸及其衍生物	C11H23N5O3	3	0.5838	2896-20-0	29061.8	33871.9	40153.2	8589.79	5441.32	18763.9	1.25848	0.0116036	0.112902	3.14337	1.65231	up	-	-
MW0011678	cis-3-Nonen-1-ol	（Z)-3-壬基-1-醇	Alcohol and amines	醇、胺类	Alcohols	醇类	C9H18O	3	0.5808	10340-23-5	50677.9	85364.3	87058.5	27571.1	35800.6	36903.1	1.30331	0.0669446	0.213193	2.22489	1.15374	up	-	-
MEDL02685	Butylphthalide	丁基苯酞	Others	其它类	Lactones	内酯类化合物	C12H14O2	3	0.5776	3413-15-8	20018.6	33328.9	12983.2	129686	126015	78562.8	1.36579	0.0220632	0.140919	0.198438	-2.33324	down	C17854	-
MW0155598	Pittoside A	山桐苷A	Terpenoids	萜类	Triterpene Saponin	三萜皂苷	C41H68O13	3	0.5756	75303-44-5	5634.92	9304.77	6142.94	16527.9	36652	27153.7	1.34641	0.0716321	0.219824	0.262439	-1.92995	down	C08969	-
MW0116275	1-(2,3-Dihydro-1H-pyrrolizin-5-yl)-1-butanone	1-(2,3-Dihydro-1H-pyrrolizin-5-yl)-1-丁酮	Others	其它类	Ketone compounds	酮类化合物	C11H15NO	3	0.5674	97072-99-6	1158.81	1251.93	192.87	7637.03	6081.41	9469.79	1.31004	0.0124786	0.114817	0.112282	-3.15481	down	-	-
MW0053619	Panaxoside RC	人参皂苷 Rc	Terpenoids	萜类	Triterpene Saponin	三萜皂苷	C53H90O22	3	0.5671	11021-14-0	20947.6	14369.5	20333.2	29432.9	65275.4	45083.2	1.26291	0.10858	0.267021	0.398095	-1.32881	down	-	-
MW0104821	2-O-Feruloylhydroxycitric acid	2-O-阿魏酰羟基柠檬酸	Phenolic acids	酚酸类	Phenolic acids	酚酸类	C16H16O11	3	0.5633	62345-86-2	16349.3	26871.5	29678.1	8500.83	4733.08	5671.42	1.37496	0.0390241	0.169473	3.856	1.9471	up	-	-
MW0014223	C20 Sulfatide	C20 硫苷	SL	鞘脂类	Cer	神经酰胺	C44H85NO11S	3	0.5537	265096-81-9	93395.8	62186.4	53927.8	28506.2	23448.1	17911.7	1.35655	0.053028	0.193283	2.99875	1.58436	up	C06125	ko00600,ko01100
MW0152714	Levisoprenaline	左丙肾上腺素	Phenolic acids	酚酸类	Phenolic acids	酚酸类	C11H17NO3	3	0.5474	51-31-0	2286.63	4630.45	5313.17	17733.7	13934.2	13940.5	1.34718	0.00290022	0.0850936	0.268158	-1.89885	down	-	-
ZINC85530008	7-O-Methylaloeresin A	7-O-甲基芦荟树脂 A	Others	其它类	Chromone	色酮类	C29H30O11	3	0.5469	329361-25-3	22979	27688	29207.9	369.04	397.87	273.14	1.45793	0.00503839	0.0973674	76.7991	6.26302	up	-	-
MEDL02591	Arecoline	槟榔碱	Alkaloids	生物碱	Piperidine alkaloids	哌啶类生物碱	C8H13NO2	3	0.5395	63-75-2	9611.72	14335.9	4292.04	3811.9	2290.61	3975.47	1.11006	0.1684	0.333209	2.80212	1.48652	up	C10129	-
MW0108317	Met-Ser	蛋氨酰丝氨酸	Amino acids and derivatives	氨基酸及其衍生物	Amino acids and derivatives	氨基酸及其衍生物	C8H16N2O4S	3	0.5365	14517-43-2	108946	13292	61485.5	344.04	1590.23	21873.1	1.06552	0.187632	0.354629	7.71707	2.94805	up	-	-
MEDL00349	Ser-Leu	丝氨酸-亮氨酸	Amino acids and derivatives	氨基酸及其衍生物	Amino acids and derivatives	氨基酸及其衍生物	C9H18N2O4	3	0.5298	6665-16-3	2583.56	2352.67	1455	8763.83	5908.92	5638.9	1.36369	0.0324655	0.157371	0.314658	-1.66814	down	-	-
MW0151985	Kaempferol 3-O-beta-D-glucosylgalactoside	山奈酚3-O-BETA-D-葡萄糖基半乳糖苷	Flavonoids	黄酮	Flavonols	黄酮醇	C27H30O16	3	0.5257	31512-06-8	16120.5	17175.4	22067.3	4622.62	6952.12	9468.58	1.32585	0.00913399	0.107897	2.63091	1.39556	up	-	-
MW0015126	7,8-Dehydro-beta-micropteroxanthin	7,8-脱氢-β-微蝶黄素	Alcohol and amines	醇、胺类	Alcohols	醇类	C27H38O2	3	0.5237	148031-76-9	3245.16	6335.65	5388.98	5766.71	57580.1	32931.3	1.06761	0.211413	0.377873	0.155485	-2.68515	down	-	-
MW0122558	8-Benzyl-1,3,8-triazaspiro[4.5]decane-2,4-dione	8-Benzyl-1,3,8-triazaspiro[4.5]decane-2,4-dione	Benzene and substituted derivatives	苯及其衍生物	Benzene and substituted derivatives	苯及其衍生物	C14H17N3O2	3	0.5151	28936-94-9	9007.6	7508.69	5735.27	2877.29	1993.29	2076.14	1.39517	0.0249175	0.145248	3.20318	1.6795	up	-	-
MEDL01819	Dhelwangin	广藿香酮	Others	其它类	Ketone compounds	酮类化合物	C12H16O4	3	0.5145	23800-56-8	231286	194147	232691	10193.3	34897.2	192477	1.01292	0.127477	0.288392	2.77027	1.47003	up	-	-
MW0001800	2-(2-Naphthyl)indole	2-(2-萘基)吲哚	Benzene and substituted derivatives	苯及其衍生物	Benzene and substituted derivatives	苯及其衍生物	C18H13N	3	0.511	23746-81-8	12043	7223.34	12924.2	4784.59	4687.3	4947.3	1.31913	0.078736	0.229482	2.23248	1.15865	up	-	-
MW0161325	Benzylsulfinylsulfanylmethylbenzene	苄基亚磺酰基硫烷基甲基苯	Benzene and substituted derivatives	苯及其衍生物	Benzene and substituted derivatives	苯及其衍生物	C14H14OS2	3	0.5048	16302-98-0	3808.17	1567.92	3818.18	6363.74	8715.11	7082.52	1.22227	0.0135201	0.11704	0.414878	-1.26924	down	-	-
MW0150669	Guinea green B	几内亚绿B	Heterocyclic compounds	杂环化合物	Heterocyclic compounds	杂环化合物	C37H35N2NaO6S2	3	0.5027	4680-78-8	2849.53	8499.9	3743.99	942.58	397.6	2067.58	1.17971	0.14839	0.31177	4.42913	2.14702	up	-	-
MW0063595	Sorbitan laurate	山梨糖醇月桂酸酯	FA	脂肪酰类	Others	其它	C18H34O6	3	0.5026	16287-68-6 | 1338-39-2 | 5959-89-7	6947.37	6768.98	7173.7	3355.59	1482.05	1476.99	1.34745	0.0137693	0.118096	3.3082	1.72605	up	-	-
MW0007578	Melamine	三聚氰胺;1,3,5-三嗪-2,4,6-三胺	Alkaloids	生物碱	Alkaloids	生物碱	C3H6N6	3	0.5021	108-78-1	24399	32116.4	28547.9	87928	73563.7	47587.1	1.32176	0.0680629	0.213965	0.406848	-1.29744	down	C08737	-
MW0144564	Ala-Glu-Ile-Lys	Ala-Glu-Ile-Lys	Amino acids and derivatives	氨基酸及其衍生物	Amino acids and derivatives	氨基酸及其衍生物	C20H37N5O7	2	0.9065	-	7460.45	15935.9	13792.2	52835	48620	46155.8	1.38002	0.000468293	0.0659656	0.251936	-1.98887	down	-	-
MW0011898	1,2-Dioctanoyl-sn-glycerol	1,2-Dioctanoyl-sn-glycerol	GL	甘油脂类	DG	甘油二酯	C19H36O5	2	0.8987	-	11036.2	12173.3	7162.13	68524.1	67557.9	53606.2	1.43471	0.00466402	0.0969504	0.160113	-2.64283	down	-	-
MW0145662	Asn-Ala-Leu-Ala-His	Asn-Ala-Leu-Ala-His	Amino acids and derivatives	氨基酸及其衍生物	Amino acids and derivatives	氨基酸及其衍生物	C22H36N8O7	2	0.8745	-	42326.7	65573.6	49201.5	156577	81569.8	76159.6	1.12773	0.174336	0.33906	0.499837	-1.00047	down	-	-
MW0153653	Met-Pro-Thr-Phe-Gln	Met-Pro-Thr-Phe-Gln	Amino acids and derivatives	氨基酸及其衍生物	Amino acids and derivatives	氨基酸及其衍生物	C28H42N6O8S	2	0.8733	-	24321.3	30166.5	16991.2	48588.8	43361.8	76075.4	1.27967	0.0722284	0.220923	0.425405	-1.23309	down	-	-
MW0154729	Oleoyl Ethanolamide-d4	油酰乙醇酰胺-D4	Lipids	脂质	Free fatty acids	游离脂肪酸	C20H35D4NO2	2	0.8657	-	1.13832e+06	2.95681e+06	2.24325e+06	962945	768723	1.16741e+06	1.11854	0.157292	0.322325	2.18634	1.12852	up	-	-
MW0061712	PI(18:0/20:4(5Z,8Z,11Z,14Z))	PI(18:0/20:4(8Z,11Z,14Z,17Z))	GP	甘油磷脂类	PI	磷脂酰肌醇	C47H83O13P	2	0.8591	-	134490	124095	96383.4	277160	269244	319288	1.42102	0.0013315	0.0714974	0.410041	-1.28616	down	-	-
MW0158653	Tyr-Tyr-Ser	酪氨酸-酪氨酸-丝氨酸	Amino acids and derivatives	氨基酸及其衍生物	Amino acids and derivatives	氨基酸及其衍生物	C21H25N3O7	2	0.8552	-	12458.4	5679.07	6386.78	31920.2	23862.8	25430.5	1.35248	0.00472556	0.0969504	0.301973	-1.72751	down	-	-
MW0158449	Tyr-Glu-Arg-Arg	酪氨酸-谷氨酸-精氨酸-精氨酸	Amino acids and derivatives	氨基酸及其衍生物	Amino acids and derivatives	氨基酸及其衍生物	C26H42N10O8	2	0.8333	-	13.24	24.19	19.24	42.45	25.81	69.1	1.13762	0.160004	0.325042	0.412566	-1.2773	down	-	-
MW0155193	Phe-Glu-Val-Glu	苯丙氨酰-谷氨酰-缬氨酸-谷氨酸	Amino acids and derivatives	氨基酸及其衍生物	Amino acids and derivatives	氨基酸及其衍生物	C24H34N4O9	2	0.8333	-	122651	97762.8	95579.1	23807.6	29411.5	103019	1.01843	0.162658	0.328076	2.02251	1.01614	up	-	-
MW0158972	Val-Gln-Met-Met-Thr	Val-Gln-Met-Met-Thr	Amino acids and derivatives	氨基酸及其衍生物	Amino acids and derivatives	氨基酸及其衍生物	C24H44N6O8S2	2	0.832	-	102929	90620.4	25095.5	140160	201598	203617	1.11414	0.027827	0.151014	0.400909	-1.31865	down	-	-
MW0156323	R-4-benzyl-3-((R)-3-hydroxy-2,2-dimethyloctanoyl)-5,5-dimethyloxazolidin-2-one	R-4-苄基-3-(（R)-3-羟基-2,2-二甲基辛酰基)-5,5-二甲基恶唑烷-2-	Benzene and substituted derivatives	苯及其衍生物	Benzene and substituted derivatives	苯及其衍生物	C22H33NO4	2	0.8056	-	14391.9	15149.1	14439.5	7809.22	6646.82	5545.59	1.41889	0.00292689	0.0850936	2.19885	1.13675	up	-	-
MW0009501	p-Phenetidine	对苯吡啶	Phenolic acids	酚酸类	Phenolic acids	酚酸类	C8H11NO	2	0.8038	-	3705.09	1132.95	1868.34	14568.6	14619.2	4580.3	1.22811	0.107352	0.266124	0.198601	-2.33206	down	-	-
MW0151652	Ile-Val-Lys-Arg-Lys	Ile-Val-Lys-Arg-Lys	Amino acids and derivatives	氨基酸及其衍生物	Amino acids and derivatives	氨基酸及其衍生物	C29H58N10O6	2	0.7927	-	1796.48	367.17	235.72	13099.3	10277.4	3747.99	1.29068	0.092371	0.245758	0.0884571	-3.49888	down	-	-
MW0156839	Ser-Lys-Gln	L-丝氨酰-L-赖氨酰-L-谷氨酰胺	Amino acids and derivatives	氨基酸及其衍生物	Amino acids and derivatives	氨基酸及其衍生物	C14H27N5O6	2	0.7876	-	7012.99	7128.47	4783.68	29835.2	18259	17576	1.37847	0.054785	0.195311	0.288185	-1.79493	down	-	-
MW0105634	Antanapeptin C	安他肽C	Benzene and substituted derivatives	苯及其衍生物	Benzene and substituted derivatives	苯及其衍生物	C41H64N4O8	2	0.779	-	2014.14	1707.85	22257.4	178507	156844	47411.5	1.25578	0.0954945	0.249631	0.0678734	-3.88101	down	-	-
MW0055323	N-(dodecanoyl)-sphing-4-enine-1-phosphocholine	N-月桂酰基-D-赤型鞘氨酰基磷酸胆碱	SL	鞘脂类	SM	鞘磷脂	C35H71N2O6P	2	0.779	-	12103.9	16534	18894.1	8122.4	7410.26	1482.51	1.09007	0.0247602	0.145194	2.79351	1.48208	up	C00550	ko00600,ko01100
MW0004100	3-methoxybenzene-1,2-diol	3-甲氧基儿茶酚	Phenolic acids	酚酸类	Phenolic acids	酚酸类	C7H8O3	2	0.777	-	4500.59	4856.85	1850.49	10646	22378.5	38724.8	1.29717	0.129593	0.290311	0.156209	-2.67845	down	-	-
MW0158927	Val-Asn-Tyr-Asp	Val-Asn-Tyr-Asp	Amino acids and derivatives	氨基酸及其衍生物	Amino acids and derivatives	氨基酸及其衍生物	C22H31N5O9	2	0.7691	-	130.75	1595.1	205.01	1856.68	2199.78	3391.18	1.12871	0.0507318	0.188921	0.259258	-1.94754	down	-	-
MW0109069	alphaS-Amino-2-[[4S-amino-4-carboxybutyl]amino]-4H-imidazo[4,5-b]pyridine-4-hexanoic acid	αS-氨基-2-[[4S-氨基-4-羧丁基]氨基]-4H-咪唑并[4,5-b]吡啶-4-己酸	Amino acids and derivatives	氨基酸及其衍生物	Amino acids and derivatives	氨基酸及其衍生物	C17H26N6O4	2	0.766	-	3095.75	1891.82	2187.29	7814.92	3037.27	10020.6	1.13965	0.153407	0.317474	0.343742	-1.5406	down	-	-
MW0139287	Peonidin 3-(6''-p-coumarylglucoside)	芍药花素-3-(6''-p-香豆基葡糖苷）	Flavonoids	黄酮	Anthocyanidins	花青素	C31H29O13+	2	0.7632	-	6554.45	14242.8	9395.95	1802.29	5365.54	1522.49	1.21592	0.0652244	0.211231	3.47435	1.79674	up	-	-
MW0146115	Asp-Gly-Lys-Ala-Asp	Asp-Gly-Lys-Ala-Asp	Amino acids and derivatives	氨基酸及其衍生物	Amino acids and derivatives	氨基酸及其衍生物	C19H32N6O10	2	0.7625	-	21555	14334.4	13750.5	8249.69	6706.4	2133.9	1.17364	0.0289688	0.15317	2.90462	1.53835	up	-	-
MW0015472	9-Nitrooleic acid	9?- 硝基油酸	Lipids	脂质	Free fatty acids	游离脂肪酸	C18H33NO4	2	0.7624	-	50270.9	97928	90515.5	6461.54	4397.59	3691.61	1.43772	0.0367254	0.165603	16.4057	4.03612	up	-	-
MW0158526	Tyr-Leu-Pro-Ala-Val	Tyr-Leu-Pro-Ala-Val	Amino acids and derivatives	氨基酸及其衍生物	Amino acids and derivatives	氨基酸及其衍生物	C28H43N5O7	2	0.7616	-	1037.98	188.04	909.33	28871.3	61733.6	69694.9	1.40961	0.0517742	0.190812	0.013321	-6.23016	down	-	-
MW0145529	Arg-Trp-His	L-精氨酰-L-色氨酸-L-组氨酸	Amino acids and derivatives	氨基酸及其衍生物	Amino acids and derivatives	氨基酸及其衍生物	C23H31N9O4	2	0.7609	-	38655.8	47838.2	46483.4	140631	207173	77188.1	1.27918	0.121194	0.279956	0.312893	-1.67626	down	-	-
MW0138677	kaempferol 3-O-beta-D-glucopyranosyl-7-O-alpha-L-rhamnopyranoside	山奈酚3-O-BETA-D-吡喃葡萄糖基-7-O-ALPHA-L-吡喃鼠李糖苷	Flavonoids	黄酮	Flavonols	黄酮醇	C27H30O15	2	0.7599	-	424.03	215.65	415.79	638.33	1372.2	1450.88	1.26187	0.0816771	0.23322	0.304925	-1.71347	down	-	-
MW0111242	N-(2-Hydroxyethyl)hexadec-9-enamide	N-(2-羟乙基)hexadec-9-enamide	Alcohol and amines	醇、胺类	Amines	胺类	C18H35NO2	2	0.7598	-	4682.84	4067.04	1964.11	73618.6	84862.2	71918.5	1.44154	0.00222182	0.0811752	0.0465018	-4.42657	down	-	-
MW0152568	Leu-Val-Phe-Ala-Ile	Leu-Val-Phe-Ala-Ile	Amino acids and derivatives	氨基酸及其衍生物	Amino acids and derivatives	氨基酸及其衍生物	C29H47N5O6	2	0.7595	-	1266.08	41567.4	12568.9	194130	184867	67328.1	1.135	0.0754898	0.224966	0.12413	-3.01007	down	-	-
MW0152333	Leu-Glu-Val-Val-Lys	Leu-Glu-Val-Val-Lys	Amino acids and derivatives	氨基酸及其衍生物	Amino acids and derivatives	氨基酸及其衍生物	C27H50N6O8	2	0.759	-	2405.02	82.22	297.87	20211	16318.2	20623	1.30716	0.00121474	0.0714974	0.0487314	-4.359	down	-	-
MW0158995	Val-Glu-Phe-Asp	Val-Glu-Phe-Asp	Amino acids and derivatives	氨基酸及其衍生物	Amino acids and derivatives	氨基酸及其衍生物	C23H32N4O9	2	0.7587	-	19504.2	25918.8	28381.4	92730.3	58194.7	70463.6	1.38224	0.0328135	0.157371	0.33337	-1.5848	down	-	-
MW0151084	His-Ser-Lys-Lys	His-Ser-Lys-Lys	Amino acids and derivatives	氨基酸及其衍生物	Amino acids and derivatives	氨基酸及其衍生物	C21H38N8O6	2	0.7582	-	949.35	2466.58	1900.66	9437.16	8582.2	9869.18	1.38033	0.000238644	0.0659656	0.190637	-2.3911	down	-	-
MW0155357	Phe-Thr-Pro-Thr-Glu	Phe-Thr-Pro-Thr-Glu	Amino acids and derivatives	氨基酸及其衍生物	Amino acids and derivatives	氨基酸及其衍生物	C27H39N5O10	2	0.7578	-	279614	164432	228557	329676	434821	737182	1.18561	0.144142	0.307645	0.447901	-1.15875	down	-	-
MW0152913	Lys-Asp-Trp	L-赖氨酸-L-天冬氨酸-L-色氨酸	Amino acids and derivatives	氨基酸及其衍生物	Amino acids and derivatives	氨基酸及其衍生物	C21H29N5O6	2	0.7575	-	2.16207e+06	2.76548e+06	2.69507e+06	933203	1.19014e+06	924169	1.41902	0.00670226	0.10188	2.50126	1.32266	up	-	-
MW0151653	Ile-Val-Lys-Trp-Asp	Ile-Val-Lys-Trp-Asp	Amino acids and derivatives	氨基酸及其衍生物	Amino acids and derivatives	氨基酸及其衍生物	C32H49N7O8	2	0.7574	-	9054.52	7221.19	8698.31	18515.9	28493.6	35698.9	1.382	0.0592407	0.203311	0.301953	-1.72761	down	-	-
MW0152445	Leu-Phe-Asn-Asp	Leu-Phe-Asn-Asp	Amino acids and derivatives	氨基酸及其衍生物	Amino acids and derivatives	氨基酸及其衍生物	C23H33N5O8	2	0.7572	-	669142	576941	487938	227212	247327	259805	1.41561	0.0209336	0.139357	2.36132	1.23959	up	-	-
MW0159218	Val-Tyr-His-Lys	Val-Tyr-His-Lys	Amino acids and derivatives	氨基酸及其衍生物	Amino acids and derivatives	氨基酸及其衍生物	C26H39N7O6	2	0.757	-	26.35	32	39.03	235.51	180.56	97.11	1.3687	0.0737409	0.222489	0.189758	-2.39777	down	-	-
MW0108141	Met-Ala-Lys	L-蛋氨酸-L-丙氨酸-L-赖氨酸	Amino acids and derivatives	氨基酸及其衍生物	Amino acids and derivatives	氨基酸及其衍生物	C14H28N4O4S1	2	0.7565	-	4407.4	5023.48	2130.25	21371.1	21801.2	10000.2	1.31708	0.0630945	0.208395	0.217427	-2.2014	down	-	-
MW0155828	Pro-Gln-Asp	脯氨酰-谷氨酰胺-天冬氨酸	Amino acids and derivatives	氨基酸及其衍生物	Amino acids and derivatives	氨基酸及其衍生物	C14H22N4O7	2	0.756	-	1762.27	4086.75	2357.04	32.51	235.41	166.89	1.34374	0.0643934	0.209754	18.8727	4.23823	up	-	-
MW0145452	Arg-Met-Met	L-精氨酰-L-甲硫氨酰-L-甲硫氨酸	Amino acids and derivatives	氨基酸及其衍生物	Amino acids and derivatives	氨基酸及其衍生物	C16H32N6O4S2	2	0.754	-	8700.65	7260.19	4662.92	19062	19064.2	16015.3	1.36639	0.00217872	0.0811752	0.380923	-1.39243	down	-	-
MW0147962	Cymathere lactone	Cymathere lactone	Amino acids and derivatives	氨基酸及其衍生物	Amino acids and derivatives	氨基酸及其衍生物	C18H26O3	2	0.7534	-	2263.3	3864.83	5932.78	39007.3	26939.8	13103.9	1.31772	0.0935301	0.246579	0.152571	-2.71245	down	-	-
MW0153723	Met-Val-Trp	甲硫氨酰-缬氨酰-色氨酸	Amino acids and derivatives	氨基酸及其衍生物	Amino acids and derivatives	氨基酸及其衍生物	C21H30N4O4S1	2	0.7531	-	4542.96	4483.51	4307.85	1197.38	1655.04	1419.9	1.43773	0.000237388	0.0659656	3.1211	1.64205	up	-	-
MW0154554	N-methylundec-10-enamide	N-methylundec-10-enamide	FA	脂肪酰类	Others	其它	C12H23NO	2	0.7531	-	6088.37	5233.99	4137.69	29460.4	11881.6	16997.8	1.32929	0.109854	0.267993	0.265	-1.91594	down	-	-
MW0145296	Arg-Asp-Ile	L-精氨酰-L-天冬氨酰-L-异亮氨酸	Amino acids and derivatives	氨基酸及其衍生物	Amino acids and derivatives	氨基酸及其衍生物	C16H30N6O6	2	0.7529	-	102746	99374.2	68316.5	8613.1	14074.2	42459.6	1.24349	0.0107805	0.112223	4.15118	2.05352	up	-	-
MW0048990	[(2R,3R,4S,5R,6S,8S,13S,16S,17R)-11-ethyl-8,16-dihydroxy-6-methoxy-13-(methoxymethyl)-11-azahexacyclo[7.7.2.12,5.01,10.03,8.013,17]nonadecan-4-yl] acetate	[(2R,3R,4S,5R,6S,8S,13S,16S,17R)-11-乙基-8,16-二羟基-6-甲氧基-13-(甲氧基甲基)-11-氮杂六环[7.7.2.12,5.01 ,10.03,8.013,17]nonadecan-4-yl] 乙酸酯	Others	其它类	Lactones	内酯类化合物	C25H39NO6	2	0.7526	-	3425.42	2128.69	2301.25	4568.88	9769.49	3069.99	1.00732	0.254853	0.421124	0.451241	-1.14803	down	-	-
MW0153121	Lys-Pro-Tyr	L-赖氨酸-L-脯氨酸-L-酪氨酸	Amino acids and derivatives	氨基酸及其衍生物	Amino acids and derivatives	氨基酸及其衍生物	C20H30N4O5	2	0.7516	-	81288.7	102961	102306	40502.8	38629.6	29099.3	1.41637	0.00537432	0.099615	2.64762	1.40469	up	-	-
MW0158533	Tyr-Lys-Arg-Glu	酪氨酸-赖氨酸-精氨酸-谷氨酸	Amino acids and derivatives	氨基酸及其衍生物	Amino acids and derivatives	氨基酸及其衍生物	C26H42N8O8	2	0.7513	-	2469.04	5507.6	2509.6	10352.1	14304.2	13867.7	1.34997	0.00497806	0.0973674	0.2722	-1.87726	down	-	-
MW0157623	Thr-Glu-Asn-Glu-Val	Thr-Glu-Asn-Glu-Val	Amino acids and derivatives	氨基酸及其衍生物	Amino acids and derivatives	氨基酸及其衍生物	C23H38N6O12	2	0.7505	-	8877.38	22162.7	14517	31689.1	34482.3	43076.1	1.24892	0.0150244	0.121876	0.417008	-1.26185	down	-	-
MW0151425	Ile-Glu-Tyr-Cys-Lys	Ile-Glu-Tyr-Cys-Lys	Amino acids and derivatives	氨基酸及其衍生物	Amino acids and derivatives	氨基酸及其衍生物	C29H46N6O9S	2	0.7491	-	429.28	668.7	1650.37	3499.39	3124.71	5116.53	1.27975	0.0204371	0.138234	0.234089	-2.09487	down	-	-
MW0153203	Lys-Val-Ile-Arg	Lys-Val-Ile-Arg	Amino acids and derivatives	氨基酸及其衍生物	Amino acids and derivatives	氨基酸及其衍生物	C23H46N8O5	2	0.749	-	4874.76	7521.12	7588.14	12619	15280.5	12730.3	1.33094	0.00526758	0.0993022	0.491857	-1.02369	down	-	-
MW0158244	Trp-Ser-Phe-Tyr-Leu	Trp-Ser-Phe-Tyr-Leu	Amino acids and derivatives	氨基酸及其衍生物	Amino acids and derivatives	氨基酸及其衍生物	C38H46N6O8	2	0.7471	-	836.03	8489.69	695.74	25315	102875	199779	1.2982	0.170219	0.335095	0.0305562	-5.03239	down	-	-
MW0158427	Tyr-Cys-Trp	酪氨酸-半胱氨酸-色氨酸	Amino acids and derivatives	氨基酸及其衍生物	Amino acids and derivatives	氨基酸及其衍生物	C23H26N4O5S1	2	0.7463	-	17570.3	12619.1	14814.8	87.99	621.7	7815.35	1.09008	0.0213365	0.140627	5.27906	2.40028	up	-	-
MW0168472	2-(N-Morpholino)ethanesulfonic acid	2-(N-吗啉代)乙磺酸	Organic acids	有机酸	Organic acids	有机酸	C6H13NO4S	2	0.7459	-	49343.3	35932.4	31749.8	102226	104519	46383.6	1.12866	0.13113	0.29196	0.462317	-1.11305	down	-	-
MW0110081	Trp-Ser-Lys	色氨酸-丝氨酸-赖氨酸	Amino acids and derivatives	氨基酸及其衍生物	Amino acids and derivatives	氨基酸及其衍生物	C20H29N5O5	2	0.7456	-	80314	133956	106399	18904.6	25660.7	24161.6	1.42334	0.0305264	0.154526	4.66584	2.22214	up	-	-
MW0138976	Mollicellin I	莫利西林 I	Benzene and substituted derivatives	苯及其衍生物	Benzene and substituted derivatives	苯及其衍生物	C21H22O6	2	0.7446	-	46265.4	42760.3	48912.9	27519	20959.4	14182.8	1.32416	0.0114723	0.112902	2.20134	1.13838	up	-	-
MW0155306	Phe-Phe-Thr	苯丙氨酰-苯丙氨酰-苏氨酸	Amino acids and derivatives	氨基酸及其衍生物	Amino acids and derivatives	氨基酸及其衍生物	C22H27N3O5	2	0.7444	-	18702.5	34777.9	21072.9	9166.3	3757.13	12215.5	1.20071	0.0621713	0.207536	2.96566	1.56835	up	-	-
MW0146364	Asp-Nap-OH	Asp-Nap-OH	Amino acids and derivatives	氨基酸及其衍生物	Amino acids and derivatives	氨基酸及其衍生物	C22H18N2O8	2	0.744	-	3609.16	2673.1	5999.24	12215.7	10627	11497	1.3284	0.00807966	0.103511	0.357648	-1.48339	down	-	-
MW0152898	Lys-Asp-Cys	L-赖氨酸-L-天冬氨酸-L-半胱氨酸	Amino acids and derivatives	氨基酸及其衍生物	Amino acids and derivatives	氨基酸及其衍生物	C13H24N4O6S1	2	0.7419	-	58875.7	83719.9	167486	22696.2	40610.7	33686.3	1.23493	0.160152	0.325069	3.19694	1.67669	up	-	-
MW0149611	Gln-Ala-Glu-Asp	谷酰氨-丙氨酸-谷氨酸-天冬氨酸	Amino acids and derivatives	氨基酸及其衍生物	Amino acids and derivatives	氨基酸及其衍生物	C17H27N5O10	2	0.7413	-	20494.3	19545.7	21692.6	10737.7	4718.38	11509.3	1.23226	0.0252214	0.146284	2.28933	1.19493	up	-	-
MW0150131	Glu-Pro-Trp	谷氨酸-脯氨酸-色氨酸	Amino acids and derivatives	氨基酸及其衍生物	Amino acids and derivatives	氨基酸及其衍生物	C21H26N4O6	2	0.741	-	102779	130748	138917	51071.2	53747.8	42914.8	1.42166	0.0146429	0.120825	2.52105	1.33402	up	-	-
MW0168389	[(2S,6S,10S,12R,13S,14S,15S,16S,17R,18R,19S,22S,23S,25R)-16,17-diacetyloxy-10,12,14,23-tetrahydroxy-6,10,19-trimethyl-13-[(2R)-2-methylbutanoyl]oxy-24-oxa-4-azaheptacyclo[12.12.0.02,11.04,9.015,25.018,23.019,25]hexacosan-22-yl] (2S,3R)-2,3-dihydroxy-2-methylbutanoate	[(2S,6S,10S,12R,13S,14S,15S,16S,17R,18R,19S,22S,23S,25R)-16,17-二乙酰氧基-10,12,14,23-四羟基-6,10 ,19-trimethyl-13-[(2R)-2-methylbutanoyl]oxy-24-oxa-4-azaheptacyclo[12.12.0.02,11.04,9.015,25.018,23.019,25]hexacosan-22-yl] (2S,3R )-2,3-二羟基-2-甲基丁酸酯	Others	其它类	Lactones	内酯类化合物	C41H63NO15	2	0.7399	-	88375.4	178620	137886	43271.2	51290.6	35774.1	1.35217	0.0686112	0.21496	3.10645	1.63527	up	C10816	-
MW0148087	Cys-Val-Ala	半胱氨酸-缬氨酸-丙氨酸	Amino acids and derivatives	氨基酸及其衍生物	Amino acids and derivatives	氨基酸及其衍生物	C11H21N3O4S1	2	0.7388	-	10327.4	3262.57	6677.24	27201.5	23513.4	12558.6	1.20099	0.064357	0.209754	0.32031	-1.64246	down	-	-
MW0145544	Arg-Tyr-Ile-Arg	Arg-Tyr-Ile-Arg	Amino acids and derivatives	氨基酸及其衍生物	Amino acids and derivatives	氨基酸及其衍生物	C27H46N10O6	2	0.7383	-	1162.92	12266	103.13	32416.2	72281.4	83833.1	1.19515	0.0569701	0.199983	0.0717761	-3.80035	down	-	-
MW0158231	Trp-Pro-Met	色氨酸-脯氨酸-甲硫氨酸	Amino acids and derivatives	氨基酸及其衍生物	Amino acids and derivatives	氨基酸及其衍生物	C21H28N4O4S1	2	0.7381	-	19765.5	27514.2	35185.3	10098.4	9567.81	9544.59	1.39262	0.0572848	0.200453	2.8231	1.49728	up	-	-
MW0149771	Gln-Phe-Asn	谷酰氨-苯丙氨酸-天门冬酰氨	Amino acids and derivatives	氨基酸及其衍生物	Amino acids and derivatives	氨基酸及其衍生物	C18H25N5O6	2	0.7379	-	27783.2	24695.7	21021.1	77847.4	53303.2	44974	1.34246	0.0689362	0.215397	0.417318	-1.26078	down	-	-
MW0146040	Asp-Asn-Ile	L-天冬氨酰-L-天冬酰胺酰-L-异亮氨酸	Amino acids and derivatives	氨基酸及其衍生物	Amino acids and derivatives	氨基酸及其衍生物	C14H24N4O7	2	0.7364	-	101535	139864	159066	58160.9	35981.2	88173.2	1.20139	0.0333133	0.158537	2.19655	1.13524	up	-	-
MW0153830	Methylcarbamyl PAF C-8	Methylcarbamyl PAF C-8	Others	其它类	Lactones	内酯类化合物	C18H39N2O7P	2	0.7361	-	38833.1	78392.1	71047.3	14139	12638.4	11617.2	1.40646	0.0538709	0.193768	4.90361	2.29384	up	-	-
MW0158433	Tyr-Gln-Gln	酪氨酸-谷氨酸-谷氨酰胺	Amino acids and derivatives	氨基酸及其衍生物	Amino acids and derivatives	氨基酸及其衍生物	C19H27N5O7	2	0.7357	-	5139.38	6541.72	7671.82	23983.5	17436.9	13161	1.34173	0.0582464	0.202273	0.35457	-1.49586	down	-	-
MW0105464	Ala-Gly-Arg	L-丙氨酰-甘氨酰-L-精氨酸	Amino acids and derivatives	氨基酸及其衍生物	Amino acids and derivatives	氨基酸及其衍生物	C11H22N6O4	2	0.7329	-	38824.6	23806.9	23740.9	80970.2	180839	101120	1.35563	0.0904711	0.243772	0.237987	-2.07105	down	-	-
MW0158406	Tyr-Asp-Ala-Asp	酪氨酸-天冬氨酸-天冬氨酸-天冬氨酸	Amino acids and derivatives	氨基酸及其衍生物	Amino acids and derivatives	氨基酸及其衍生物	C20H26N4O10	2	0.7328	-	42727.3	70721.1	66940.7	155110	111431	137168	1.32059	0.0113053	0.112902	0.446829	-1.1622	down	-	-
MW0151511	Ile-Lys-Gly-Lys-Leu	Ile-Lys-Gly-Lys-Leu	Amino acids and derivatives	氨基酸及其衍生物	Amino acids and derivatives	氨基酸及其衍生物	C26H51N7O6	2	0.7325	-	70060.1	88375.4	26201.4	22223.3	14101.7	21370.2	1.15701	0.14628	0.310068	3.20022	1.67817	up	-	-
MW0146230	Asp-Phe-Tyr	L-天冬氨酰-L-苯丙氨酰-L-酪氨酸	Amino acids and derivatives	氨基酸及其衍生物	Amino acids and derivatives	氨基酸及其衍生物	C22H25N3O7	2	0.7311	-	73304.8	69431	71415.9	31707.3	37545.6	19927.3	1.34915	0.0121714	0.114817	2.40134	1.26384	up	-	-
MW0145332	Arg-Gln-Ser-Lys	Arg-Gln-Ser-Lys	Amino acids and derivatives	氨基酸及其衍生物	Amino acids and derivatives	氨基酸及其衍生物	C20H39N9O7	2	0.7301	-	1038.14	2578.96	4829.24	23573	44230.7	67375.5	1.36207	0.0780989	0.228718	0.0624825	-4.0004	down	-	-
MW0001532	1-Benzylpiperazine	苄基哌嗪	Phenolic acids	酚酸类	Phenolic acids	酚酸类	C11H16N2	2	0.7287	-	78926.1	103448	71769.6	262664	213994	217877	1.41519	0.00278017	0.0850936	0.365919	-1.4504	down	-	-
MW0146152	Asp-Ile-Lys-Glu-Met	Asp-Ile-Lys-Glu-Met	Amino acids and derivatives	氨基酸及其衍生物	Amino acids and derivatives	氨基酸及其衍生物	C26H46N6O10S	2	0.7273	-	20773.8	22483.4	13106.2	7517.73	6471.83	5452.25	1.36676	0.0456964	0.180914	2.89908	1.5356	up	-	-
MW0157029	Ser-Trp	L-丝氨酸-L-色氨酸	Amino acids and derivatives	氨基酸及其衍生物	Amino acids and derivatives	氨基酸及其衍生物	C14H17N3O4	2	0.7255	-	1808.69	3416.23	1730.99	12543.3	6869.64	7516.48	1.34207	0.0550236	0.19594	0.258301	-1.95287	down	-	-
MW0145438	Arg-Lys-His-Arg	Arg-Lys-His-Arg	Amino acids and derivatives	氨基酸及其衍生物	Amino acids and derivatives	氨基酸及其衍生物	C24H45N13O5	2	0.7251	-	628.44	226.28	6508.43	20551.9	17463.3	24654.4	1.21283	0.00317987	0.0850936	0.117492	-3.08937	down	-	-
MW0157832	Thr-Tyr-Arg-Lys	Thr-Tyr-Arg-Lys	Amino acids and derivatives	氨基酸及其衍生物	Amino acids and derivatives	氨基酸及其衍生物	C25H42N8O7	2	0.7251	-	4997.76	4707.01	5262.84	20723.3	16727.7	26755.7	1.43317	0.0297973	0.153711	0.233116	-2.10088	down	-	-
MW0145264	Arg-Arg-Phe	L-精氨酰-L-精氨酰-L-苯丙氨酸	Amino acids and derivatives	氨基酸及其衍生物	Amino acids and derivatives	氨基酸及其衍生物	C21H35N9O4	2	0.7246	-	25705.4	80018	18138.3	343636	243221	136821	1.27977	0.0669407	0.213193	0.171156	-2.54662	down	-	-
MW0144569	Ala-Glu-Phe-His-Phe	Ala-Glu-Phe-His-Phe	Amino acids and derivatives	氨基酸及其衍生物	Amino acids and derivatives	氨基酸及其衍生物	C32H39N7O8	2	0.7245	-	5871.29	3515.13	1780.04	19327.2	11759.2	10476.8	1.27682	0.0503355	0.188255	0.268662	-1.89614	down	-	-
MW0156004	Pro-Thr-His	脯氨酰-苏氨酰-组氨酸	Amino acids and derivatives	氨基酸及其衍生物	Amino acids and derivatives	氨基酸及其衍生物	C15H23N5O5	2	0.7245	-	103945	67896.9	70092.8	217709	177463	149670	1.34497	0.0184415	0.132665	0.444046	-1.17122	down	-	-
MW0151009	His-Lys-Gln-Lys	组氨酸-赖氨酸-谷酰胺-赖氨酸	Amino acids and derivatives	氨基酸及其衍生物	Amino acids and derivatives	氨基酸及其衍生物	C23H41N9O6	2	0.7237	-	59.45	3151.16	2517.86	15417	11105.2	18487.7	1.08237	0.0141915	0.120256	0.127271	-2.97402	down	-	-
MW0153024	Lys-Leu-Ala-Glu	Lys-Leu-Ala-Glu	Amino acids and derivatives	氨基酸及其衍生物	Amino acids and derivatives	氨基酸及其衍生物	C20H37N5O7	2	0.7222	-	22446.9	27634.2	19336.1	51012.9	61000.7	35239.5	1.29525	0.0627585	0.208293	0.471413	-1.08494	down	-	-
MW0152907	Lys-Asp-Met-Thr-Cys	Lys-Asp-Met-Thr-Cys	Amino acids and derivatives	氨基酸及其衍生物	Amino acids and derivatives	氨基酸及其衍生物	C22H40N6O9S2	2	0.7219	-	58934.9	47388.1	30549.6	37326.4	15320.5	13978.5	1.06775	0.105022	0.263157	2.05436	1.03869	up	-	-
MW0105770	Asn-Cys	L-天冬酰胺-L-半胱氨酸	Amino acids and derivatives	氨基酸及其衍生物	Amino acids and derivatives	氨基酸及其衍生物	C7H13N3O4S1	2	0.7217	-	18539.9	38336.7	37775.6	1292.35	1802.75	3998.8	1.3943	0.0442952	0.180183	13.3428	3.73798	up	-	-
MW0011866	1,2-Docosahexanoyl-sn-glycero-3-phosphocholine	1,2-二十二碳六烯酰基-sn-甘油-3-磷酸胆碱	GP	甘油磷脂类	PC	磷脂酰胆碱	C52H80NO8P	2	0.7193	-	10101.7	8505.9	5883.27	2473.9	546.71	4874.08	1.07013	0.0344387	0.161085	3.1022	1.63329	up	C00157	ko00564,ko00590,ko00591,ko00592,ko01100,ko01110
MW0158872	Val-Ala-His-Glu	Val-Ala-His-Glu	Amino acids and derivatives	氨基酸及其衍生物	Amino acids and derivatives	氨基酸及其衍生物	C19H30N6O7	2	0.7183	-	2075.17	3058.06	4310.5	17162.4	8737.39	10719.6	1.33194	0.0627004	0.208253	0.257889	-1.95518	down	-	-
MW0157706	Thr-Leu-Lys-Lys	Thr-Leu-Lys-Lys	Amino acids and derivatives	氨基酸及其衍生物	Amino acids and derivatives	氨基酸及其衍生物	C22H44N6O6	2	0.7169	-	672.6	2444.33	2925.34	9311.94	5779.09	13536.3	1.22789	0.0676893	0.21395	0.211066	-2.24423	down	-	-
MW0153040	Lys-Leu-His-Val-Asp	Lys-Leu-His-Val-Asp	Amino acids and derivatives	氨基酸及其衍生物	Amino acids and derivatives	氨基酸及其衍生物	C27H46N8O8	2	0.7157	-	7320.34	1009.64	5714.18	31904.5	37175.4	44096.4	1.29075	0.00345312	0.0862322	0.124091	-3.01053	down	-	-
MW0014275	3'-p-Hydroxypaclitaxel	3′-对羟基紫杉醇	Phenolic acids	酚酸类	Phenolic acids	酚酸类	C47H51NO15	2	0.7156	-	30736	55865.6	46885.2	13771.9	16462.7	17985.8	1.36258	0.0572349	0.200453	2.76826	1.46898	up	-	-
MW0157869	Thr-Val-Phe	苏氨酸-缬氨酸-苯丙氨酸	Amino acids and derivatives	氨基酸及其衍生物	Amino acids and derivatives	氨基酸及其衍生物	C18H27N3O5	2	0.7091	-	92683.8	123586	156048	22101.7	31897.1	27504.2	1.42059	0.0312889	0.155606	4.56815	2.19161	up	-	-
MW0145407	Arg-Leu-Arg-Glu-Lys	Arg-Leu-Arg-Glu-Lys	Amino acids and derivatives	氨基酸及其衍生物	Amino acids and derivatives	氨基酸及其衍生物	C29H56N12O8	2	0.708	-	17397.7	10593	17924	1498.85	2993.39	3339.81	1.37975	0.0274393	0.150495	5.86241	2.55149	up	-	-
MW0150423	Gly-Lys-Lys-Gln-Leu	甘氨酸-赖氨酸-赖氨酸-谷酰胺-亮氨酸	Amino acids and derivatives	氨基酸及其衍生物	Amino acids and derivatives	氨基酸及其衍生物	C25H48N8O7	2	0.7077	-	3665.26	3221.48	3701.69	10699.1	9386.83	12239.3	1.44166	0.0106395	0.112223	0.327559	-1.61017	down	-	-
MW0149759	Gln-Lys-Lys-Leu-Ala	谷酰氨-赖氨酸-赖氨酸-亮氨酸-丙氨酸	Amino acids and derivatives	氨基酸及其衍生物	Amino acids and derivatives	氨基酸及其衍生物	C26H50N8O7	2	0.705	-	576.1	2980.32	307	99120.5	66380.5	18377.2	1.34926	0.124561	0.285132	0.0210108	-5.57273	down	-	-
MW0107443	Ile-His-Lys	L-异亮氨酸-L-组氨酸-L-赖氨酸	Amino acids and derivatives	氨基酸及其衍生物	Amino acids and derivatives	氨基酸及其衍生物	C18H32N6O4	2	0.7047	-	116860	107130	83935.5	39475.8	28933.9	28755.5	1.41508	0.0112525	0.112902	3.16909	1.66407	up	-	-
MW0150520	Gly-Tyr-Phe	甘氨酸-酪氨酸-苯丙氨酸	Amino acids and derivatives	氨基酸及其衍生物	Amino acids and derivatives	氨基酸及其衍生物	C20H23N3O5	2	0.7044	-	20648.8	8415.82	7202.64	43245.6	43138.4	40948.1	1.32469	0.0170781	0.128017	0.284824	-1.81186	down	-	-
MW0156983	Ser-Val-Phe	丝氨酰-缬氨酰-苯丙氨酸	Amino acids and derivatives	氨基酸及其衍生物	Amino acids and derivatives	氨基酸及其衍生物	C17H25N3O5	2	0.7043	-	61137.8	61833.9	61286.8	31786.1	17173.1	32853.9	1.30997	0.0210901	0.139657	2.25219	1.17133	up	-	-
MW0154298	Nap-Val-OH	Nap-Val-OH	Amino acids and derivatives	氨基酸及其衍生物	Amino acids and derivatives	氨基酸及其衍生物	C23H22N2O6	2	0.7042	-	261776	204065	194219	517295	445188	385917	1.3797	0.0119352	0.113715	0.489513	-1.03058	down	-	-
MW0110195	Tyr-Gln-Lys	酪氨酸-谷氨酰胺-赖氨酸	Amino acids and derivatives	氨基酸及其衍生物	Amino acids and derivatives	氨基酸及其衍生物	C20H31N5O6	2	0.7004	-	77976.3	108014	96648.2	282204	147641	163391	1.22576	0.129764	0.290311	0.476434	-1.06965	down	-	-
MEDL02561	3-p-Coumaroylquinic acid	3-O-对香豆酰奎宁酸	Phenolic acids	酚酸类	Phenolic acids	酚酸类	C16H18O8	3	0.9896	-	135972	201285	202026	322443	641472	537219	1.31165	0.0692661	0.215701	0.35925	-1.47694	down	-	-
MW0165906	dTDP-3-N,N-dimethylamino-4-oxo-2,3,6-trideoxy-alpha-D-glucose	dTDP-3-N,N-dimethylamino-4-oxo-2,3,6-trideoxy-alpha-D-glucose	Nucleotides and derivatives	核苷酸及其衍生物	Nucleotides and derivatives	核苷酸及其衍生物	C18H28N3O13P2-	3	0.9883	-	206817	408426	560572	60769.3	89901.6	80128.7	1.35874	0.0904831	0.243772	5.09453	2.34895	up	-	-
MW0013164	NCGC00381336-01_C33H50O21_2,6-Anhydro-5-O-[4-({6-O-[4-(beta-D-glucopyranosyloxy)-2-methylenebutanoyl]-beta-D-glucopyranosyl}oxy)-2-methylenebutanoyl]-1-O-(4-hydroxy-2-methylenebutanoyl)hexitol	NCGC00381336-01_C33H50O21_2,6-Anhydro-5-O-[4-({6-O-[4-(β-D-吡喃葡萄糖基)-2-亚甲基丁酰基]-β-D-吡喃葡萄糖基}氧基)-2-亚甲基丁酰基] -1-O-(4-羟基-2-亚甲基丁酰基)己糖醇	Alcohol and amines	醇、胺类	Alcohols	醇类	C33H50O21	3	0.9855	-	6515.79	5407.69	5819.9	18425.6	11559.7	9488.07	1.28193	0.113448	0.272745	0.449503	-1.1536	down	-	-
MW0167804	[2-hexadecanoyloxy-3-[hydroxy-[2-(methylamino)ethoxy]phosphoryl]oxypropyl] (Z)-octadec-9-enoate	PE-NMe(18:1(9Z)/16:0)	GL	甘油脂类	DG	甘油二酯	C40H78NO8P	3	0.983	-	36963.3	33213.5	42655	5118.08	9081.33	3032.95	1.38822	0.00129221	0.0714974	6.54767	2.71098	up	-	-
MW0011238	2-(hydroxymethyl)-6-[(E)-4-(1,2,4-trihydroxy-2,6,6-trimethylcyclohexyl)but-3-en-2-yl]oxyoxane-3,4,5-triol	2-(羟甲基)-6-[(E)-4-(1,2,4-trihydroxy-2,6,6-trimethylcyclohexyl)but-3-en-2-yl]oxyoxane-3,4,5-三醇	Others	其它类	Saccharides	糖类	C19H34O9	3	0.9829	-	12064.5	15866	19920.6	2149.61	3965.28	3089.25	1.40824	0.0247494	0.145194	5.19888	2.3782	up	-	-
ZINC35850717	(5beta,9alpha,10alpha,13S)-19-[(3,4-Dihydroxy-trans-cinnamoyl)oxy]labd-8(20)-en-15-oic acid	（3S)-5-[（1R，4aS，5S，8aS)-5-[[（E)-3-(3，4-二羟基苯基）丙-2-烯酰基]氧甲基]-5，8a-二甲基-2-亚甲基-3，4，4A，6，7，8-六氢-1H-萘-1-基]-3-甲基戊酸	Organic acids	有机酸	Organic acids	有机酸	C29H40O6	3	0.9754	-	7873.65	11418.9	12569.3	19544	22882.9	31627.3	1.31474	0.0452682	0.180429	0.43025	-1.21675	down	-	-
MW0165073	fusicoccin P	褐藻素P	Alcohol and amines	醇、胺类	Alcohols	醇类	C27H44O9	3	0.9746	-	16478.7	27199.1	9192.13	470910	416621	127588	1.37368	0.0945504	0.248039	0.0520824	-4.26306	down	-	-
MW0110465	(3S,4S,7S,10S)-4-[(2-hydroxy-4-methylpentanoyl)amino]-7-(2-methylpropyl)-5,8-dioxo-3-propan-2-yl-2-oxa-6,9-diazabicyclo[10.2.2]hexadeca-1(14),12,15-triene-10-carboxylic acid	(3S,4S,7S,10S)-4-[(2-羟基-4-甲基戊酰基)氨基]-7-(2-甲基丙基)-5,8-dioxo-3-propan-2-yl-2-oxa -6,9-二氮杂双环[10.2.2]hexadeca-1(14),12,15-triene-10-甲酸	Organic acids	有机酸	Organic acids	有机酸	C27H41N3O7	3	0.9743	-	6605.43	9532.86	10683.3	26474.7	20382.1	18425.2	1.34431	0.0186908	0.133219	0.410858	-1.28329	down	-	-
MW0010628	Myricatomentoside I	肉豆蔻苷 I	Benzene and substituted derivatives	苯及其衍生物	Benzene and substituted derivatives	苯及其衍生物	C26H32O10	3	0.9736	-	305373	177245	217929	635686	750171	750169	1.40469	0.000878048	0.0686411	0.327967	-1.60838	down	-	-
MW0056785	1-tetradecanoyl-2-(9Z-hexadecenoyl)-sn-glycero-3-phosphocholine	PC(14:0/16:1(9Z))	GP	甘油磷脂类	PC	磷脂酰胆碱	C38H74NO8P	3	0.9726	-	67702.3	113511	174318	13540.5	13540.5	13540.5	1.41813	0.0767096	0.226459	8.75233	3.12967	up	-	-
MW0128622	[2-hydroxy-5-(5,6,7-trihydroxy-4-oxo-4H-chromen-2-yl)phenyl]oxidanesulfonic acid	[2-羟基-5-(5，6，7-三羟基-4-氧代-4H-苯并吡喃-2-基）苯基]氧代磺酸	Organic acids	有机酸	Organic acids	有机酸	C15H10O10S	3	0.9716	-	1207.16	177.4	2323.38	20738.7	12026	18718.8	1.29232	0.0215346	0.140802	0.072022	-3.79542	down	-	-
MW0011028	(2E,4E)-5-[8-hydroxy-1,5-dimethyl-3-[3,4,5-trihydroxy-6-(hydroxymethyl)oxan-2-yl]oxy-6-oxabicyclo[3.2.1]octan-8-yl]-3-methylpenta-2,4-dienoic acid	(2E,4E)-5-[8-hydroxy-1,5-dimethyl-3-[3,4,5-trihydroxy-6-(hydroxymethyl)oxan-2-yl]oxy-6-oxabicyclo[3.2.1]octan-8-yl]-3-methylpenta-2,4-dienoic acid	Organic acids	有机酸	Organic acids	有机酸	C21H32O10	3	0.9701	-	31886.6	17019.9	12413.3	61044	70736.1	45859.2	1.29201	0.0154303	0.123259	0.345193	-1.53453	down	-	-
MW0168292	Praecoxin A	早生旌节花素 A	Tannins	鞣质	Tannin	鞣质	C41H28O27	3	0.9694	-	93313	95336.8	111930	14036.7	8186.45	19020.3	1.41769	0.000923877	0.0686411	7.28792	2.86551	up	-	-
ZINC85530353	N2-Methylfangchinoline	N2-Methylfangchinoline	Lignans and Coumarins	木脂素和香豆素	Lignans	木脂素	C38H43N2O6+	3	0.9573	-	75098.5	45696	72488.9	21981.7	21168.9	37657.4	1.27289	0.0369962	0.16634	2.39188	1.25815	up	-	-
MW0011283	(3S,5R,6S,7E,9x)-7-Megastigmene-3,6,9-triol 9-glucoside	(3S,5R,6S,7E,9x)-7-Megastigmene-3,6,9-triol 9-glucoside	Others	其它类	Saccharides	糖类	C19H34O8	3	0.9214	-	6165.83	5898.69	6567.73	64831.3	64416.6	48310.7	1.45244	0.010304	0.111886	0.104936	-3.25242	down	-	-
MW0146116	Asp-Gly-Lys-Ile-Leu	Asp-Gly-Lys-Ile-Leu	Amino acids and derivatives	氨基酸及其衍生物	Amino acids and derivatives	氨基酸及其衍生物	C24H44N6O8	3	0.9185	-	3573	3092.08	582.32	43255.2	38444.5	9214.36	1.26147	0.118778	0.277294	0.0797171	-3.64897	down	-	-
MW0056825	PC(14:1(9Z)/18:4(6Z,9Z,12Z,15Z))	PC(14:1(9Z)/18:4(6Z,9Z,12Z,15Z))	GP	甘油磷脂类	PC	磷脂酰胆碱	C40H70NO8P	3	0.909	-	86990.2	98357.5	54981.2	179500	251362	181893	1.34443	0.0176687	0.130546	0.392211	-1.3503	down	-	-
MW0138049	ent-Epiafzelechin(2a->7,4a->8)epiafzelechin 3-(4-hydroxybenzoic acid)	ent-Epiafzelechin(2a->7,4a->8)epiafzelechin 3-(4-羟基苯甲酸)	Flavonoids	黄酮	Flavanols	黄烷醇类	C37H28O12	3	0.9012	-	8136.32	6128.29	6966.56	14003.3	14661.7	14887.2	1.42519	0.00188912	0.0797717	0.487488	-1.03656	down	-	-
MW0011813	1-(6Z,9Z,12Z,15Z-octadecatetraenoyl)-glycero-3-phosphate	1-(6Z,9Z,12Z,15Z-十八碳四烯酰基)-甘油-3-磷酸	GP	甘油磷脂类	PA	磷脂酸	C21H35O7P	3	0.8982	-	21546.5	24514.7	18534.1	10880.8	6824.8	5697.43	1.35869	0.00429962	0.0945682	2.76013	1.46474	up	-	-
MW0125535	N-[1-(4-methoxy-6-oxopyran-2-yl)-2-methylbutyl]acetamide	N-[1-(4-甲氧基-6-氧代吡喃-2-基)-2-甲基丁基]乙酰胺	Alcohol and amines	醇、胺类	Amines	胺类	C13H19NO4	3	0.87	-	33435.6	54041.4	52055.2	13413.2	16615	14324.3	1.40363	0.0378109	0.167896	3.14598	1.65351	up	-	-
MW0130135	2-(3,4-dihydroxyphenyl)-4-[3,5,7-trihydroxy-2-(3-hydroxyphenyl)-3,4-dihydro-2H-1-benzopyran-8-yl]-6-[3,4,5-trihydroxy-6-(hydroxymethyl)oxan-2-yl]-3,4-dihydro-2H-1-benzopyran-3,5,7-triol	2-(3，4-二羟基苯基)-4-[3，5，7-三羟基-2-(3-羟基苯基)-3，4-二氢-2H-1-苯并吡喃-8-基]-6-[3，4，5-三羟基-6-(羟甲基）恶烷-2-基]-3，4-二氢-2H-1-苯并吡喃-3，5，7-三醇	Benzene and substituted derivatives	苯及其衍生物	Benzene and substituted derivatives	苯及其衍生物	C36H36O16	3	0.8623	-	379091	261385	285176	89237.5	82645.6	193925	1.24853	0.0214559	0.140802	2.53043	1.33938	up	-	-
MW0145503	Arg-Ser-Thr	L-精氨酰-L-丝氨酰-L-苏氨酸	Amino acids and derivatives	氨基酸及其衍生物	Amino acids and derivatives	氨基酸及其衍生物	C13H26N6O6	3	0.8605	-	16966.7	19808.6	23072.7	5355.85	6548.14	10040.7	1.35528	0.00575766	0.10028	2.72722	1.44743	up	-	-
MW0163163	[(Iminiomethyl)amino]acetate	[(亚氨基甲基)氨基]乙酸盐	Others	其它类	Lactones	内酯类化合物	C3H6N2O2	3	0.8405	-	10074.1	11317.8	11615.8	26983.9	24127	26126.4	1.44489	0.000483246	0.0659656	0.427354	-1.2265	down	-	-
MW0061562	PGP(i-12:0/i-12:0)	PGP(i-12:0/i-12:0)	GP	甘油磷脂类	PG-P	磷脂酰甘油磷酸	C30H60O13P2	3	0.8257	-	283699	213665	179786	48435.8	70965.4	156611	1.16233	0.0412795	0.173566	2.45333	1.29474	up	-	-
MW0131723	3,4,5-trihydroxy-6-[(3-hydroxy-4-oxo-2-phenyl-4H-chromen-5-yl)oxy]oxane-2-carboxylic acid	3，4，5-三羟基-6-[（3-羟基-4-氧代-2-苯基-4H-苯并吡喃-5-基）氧基]恶烷-2-羧酸	Organic acids	有机酸	Organic acids	有机酸	C21H18O10	3	0.8142	-	8140.6	16813.9	16965.2	3010.11	3328.51	3024.01	1.38807	0.0650625	0.211191	4.47735	2.16264	up	-	-
MW0139214	Osmanthuside A	桂花甲	Benzene and substituted derivatives	苯及其衍生物	Benzene and substituted derivatives	苯及其衍生物	C23H26O9	3	0.7958	-	73830.9	91506.9	72538.7	22553.3	37065.3	41776.1	1.31949	0.00573241	0.10028	2.34604	1.23023	up	-	-
MEDP1444	FFA(18:5)	十八碳五烯酸	Lipids	脂质	Free fatty acids	游离脂肪酸	C18H26O2	3	0.7957	-	49363.5	62640.2	76120.7	476759	383112	218403	1.38836	0.0576848	0.201095	0.174468	-2.51897	down	-	-
MW0059311	PE-NMe(15:0/20:5(5Z,8Z,11Z,14Z,17Z))	PE-NMe(15:0/20:5(5Z,8Z,11Z,14Z,17Z))	GP	甘油磷脂类	PE	磷脂酰乙醇胺	C41H72NO8P	3	0.7821	-	11639.9	639.15	9505.81	21650.2	39953.1	56959.5	1.09012	0.0749118	0.224107	0.183741	-2.44425	down	-	-
MEDP1446	Octadecadienamide	十八碳二烯酰胺	Alcohol and amines	醇、胺类	Amines	胺类	C18H33NO	3	0.7806	-	142308	137535	135951	222.96	838.69	9502.14	1.31872	1.37849e-05	0.03413	39.3603	5.29867	up	-	-
MEDL00403	2-Hexadecenal	2-十六碳烯醛	FA	脂肪酰类	Others	其它	C16H30O	3	0.7772	-	571951	629091	583108	12941	8384.69	11019	1.45725	0.000843945	0.0686411	55.1605	5.78556	up	C06123	-
MEDP1430	Carnitine C7:0	肉碱 C7:0	FA	脂肪酰类	CAR	酰基肉碱	C14H27NO4	3	0.7696	-	22822.7	15654.8	10990.9	61274	53051.8	42647.2	1.36197	0.00797766	0.103511	0.31514	-1.66594	down	-	-
MEDL00404	2-Palmitoyl-rac-glycerol	2-棕榈酰甘油	GL	甘油脂类	DG	甘油二酯	C19H38O4	3	0.7494	-	6490.02	6200.02	7470.43	20969.4	18274.8	18732.7	1.44406	0.00114853	0.0714974	0.347733	-1.52395	down	-	-
MW0160559	2-Nitrobenzoate	2-硝基苯甲酸酯	Benzene and substituted derivatives	苯及其衍生物	Benzene and substituted derivatives	苯及其衍生物	C7H4NO4-	3	0.748	-	19108.2	40849.8	33953.1	10834.7	6215.56	12028.2	1.29674	0.0687834	0.215209	3.22958	1.69135	up	-	-
MW0013478	2-Hexaprenyl-6-methoxy-1,4-benzoquinone	2-己异戊烯基-6-甲氧基-1，4-苯醌	Benzene and substituted derivatives	苯及其衍生物	Benzene and substituted derivatives	苯及其衍生物	C37H54O3	3	0.7476	-	7373.66	10307	7637.83	2781.81	4115.88	4666.01	1.31394	0.0207799	0.139047	2.18948	1.13059	up	C05803	-
MW0128244	(5-{6,8-bis[2-(3,4-dihydroxyphenyl)-3,7-dihydroxy-3,4-dihydro-2H-1-benzopyran-4-yl]-3,5,7-trihydroxy-3,4-dihydro-2H-1-benzopyran-2-yl}-2-hydroxyphenyl)oxidanesulfonic acid	（5-{6，8-双[2-(3，4-二羟基苯基)-3，7-二羟基-3，4-二氢-2H-1-苯并吡喃-4-基]-3，5，7-三羟基-3，4-二氢-2H-1-苯并吡喃-2-基}-2-羟基苯基）氧代磺酸	Organic acids	有机酸	Organic acids	有机酸	C45H38O19S	3	0.7438	-	46836.4	14994.3	22384.2	68512.2	67217.4	104486	1.23965	0.0311317	0.155594	0.35058	-1.51218	down	-	-
MW0165144	(2R,3R,4R,5S,6R)-3,4,5-trihydroxy-6-[5,5,5-trideuterio-2-(3,3,3-trideuteriopropyl)pentanoyl]oxyoxane-2-carboxylic acid	(2R,3R,4R,5S,6R)-3,4,5-trihydroxy-6-[5,5,5-trideuterio-2-(3,3,3-trideuteriopropyl)pentanoyl]oxyoxane-2-carboxylic acid	Organic acids	有机酸	Organic acids	有机酸	C14H24O8	3	0.7427	-	14611.6	7897.19	8888.44	33807.8	29078.3	23481.2	1.35045	0.00976958	0.109972	0.363531	-1.45985	down	-	-
MW0163638	9-(Methylthio)-2-oxononanoate	9-(甲硫基)-2-氧代壬酸酯	Others	其它类	Lactones	内酯类化合物	C10H17O3S-	3	0.7401	-	6927.54	6552.02	5670.75	1642.34	1830.44	2999.14	1.37251	0.00182045	0.0797717	2.95898	1.5651	up	-	-
MW0151475	Ile-Ile-Met	L-异亮氨酸-L-异亮氨酸-L-蛋氨酸	Amino acids and derivatives	氨基酸及其衍生物	Amino acids and derivatives	氨基酸及其衍生物	C17H33N3O4S1	3	0.739	-	12657.3	11976.4	11154.3	50946	38300.1	26472.3	1.37967	0.0631667	0.208395	0.309268	-1.69307	down	-	-
MW0146933	Bz-Arg-OEt	N-苯甲酰基-L-精氨酸乙酯盐酸盐	Benzene and substituted derivatives	苯及其衍生物	Benzene and substituted derivatives	苯及其衍生物	C15H22N4O3	3	0.7382	-	8250.97	6448.48	3722.58	16345.8	17239.7	9708.19	1.21317	0.0525031	0.192395	0.425514	-1.23272	down	C01670	-
MW0131460	2,3-(S)-hexahydroxydiphenoyl-D-glucose	2,3-(S)-六羟基二苯酰基-D-葡萄糖	Phenolic acids	酚酸类	Phenolic acids	酚酸类	C20H18O14	3	0.7377	-	22017.3	19586.5	24653.7	440.85	359.62	4242.97	1.30594	0.000510164	0.0659656	13.1374	3.7156	up	-	-
MW0166079	Acylsucrose S4:17[2](2,5,5,5)	酰基蔗糖 S4:17[2](2,5,5,5)	Others	其它类	Lactones	内酯类化合物	C29H48O15	3	0.7375	-	1695.65	2122.66	2348.34	413.88	348.82	665.84	1.4031	0.0054237	0.099615	4.31675	2.10995	up	-	-
MW0133910	5,6,7,8-tetrahydroxy-2-(3,4,5-trihydroxyphenyl)-3,4-dihydro-2H-1-benzopyran-4-one	5,6,7,8-四羟基-2-(3,4,5-三羟基苯基)-3,4-二氢-2H-1-苯并吡喃-4-酮	Benzene and substituted derivatives	苯及其衍生物	Benzene and substituted derivatives	苯及其衍生物	C15H12O9	3	0.7359	-	11558.8	10423.8	13844.8	33108.8	32286.6	25623	1.41182	0.00795437	0.103511	0.393627	-1.3451	down	-	-
MW0112693	(2R,3S,4S,5R,6S)-2-[(3,4,5-trihydroxyoxan-2-yl)oxymethyl]-6-(3,4,5-trimethoxyphenoxy)oxane-3,4,5-triol	(2R,3S,4S,5R,6S)-2-[(3,4,5-trihydroxyoxan-2-yl)oxymethyl]-6-(3,4,5-trimethoxyphenoxy)oxane-3,4,5-triol	Benzene and substituted derivatives	苯及其衍生物	Benzene and substituted derivatives	苯及其衍生物	C20H30O13	3	0.7316	-	4401.28	3733.91	2573.24	27197.7	16421	4352.81	1.08563	0.199783	0.364957	0.223225	-2.16343	down	-	-
MW0140333	(2Z,4Z)-2-hydroxyhexa-2,4-dienoic acid	（2Z，4Z)-2-羟基己-2，4-二烯酸酯；（2Z，4Z)-2-羟基己-2，4-二烯酸	Organic acids	有机酸	Organic acids	有机酸	C6H8O3	3	0.7289	-	9160.82	24807.7	11405.5	6018.65	8508.67	5800.01	1.0848	0.227008	0.392736	2.23217	1.15844	up	C20240	-
MW0145720	Asn-Gln-Gln	L-天冬酰胺-L-谷氨酰胺-L-谷氨酰胺	Amino acids and derivatives	氨基酸及其衍生物	Amino acids and derivatives	氨基酸及其衍生物	C14H24N6O7	3	0.7284	-	3723.71	16912.1	1871.82	58133	17178.5	15071.4	1.05002	0.243096	0.408388	0.249025	-2.00564	down	-	-
MW0061198	PG(18:3(6Z,9Z,12Z)/22:6(4Z,7Z,10Z,13Z,16Z,19Z))	PG(18:3(6Z,9Z,12Z)/22:6(4Z,7Z,10Z,13Z,16Z,19Z))	GP	甘油磷脂类	PG	磷脂酰甘油	C46H73O10P	3	0.7274	-	15406.9	16953.8	23210.8	6612.48	2876.35	6041.17	1.34155	0.0164414	0.126458	3.57833	1.83929	up	-	-
MW0113074	4-Hydroxy-5-(3',4'-dihydroxyphenyl)-valeric acid-O-methyl-O-glucuronide	4-Hydroxy-5-(3',4'-dihydroxyphenyl)-valeric acid-O-methyl-O-glucuronide	Organic acids	有机酸	Organic acids	有机酸	C18H26O12	3	0.726	-	13834.9	16097.1	18832.5	5031.28	6413.65	4724.97	1.42481	0.010196	0.111886	3.01576	1.59252	up	-	-
MW0113347	6-(3-Ethenylphenoxy)-3,4,5-trihydroxyoxane-2-carboxylic acid	6-(3-乙烯基苯氧基)-3，4，5-三羟基恶烷-2-羧酸	Organic acids	有机酸	Organic acids	有机酸	C14H16O7	3	0.7258	-	6379.49	18365.6	17517	6252.18	5749.66	6871.47	1.05075	0.180134	0.345754	2.23925	1.16302	up	-	-
MW0107227	Hexaglutamyl folate	六谷氨酰叶酸	Organic acids	有机酸	Organic acids	有机酸	C44H54N12O21	3	0.725	-	4500.26	2241.02	5265.24	697.93	398.13	2731.4	1.08868	0.0825784	0.234075	3.13694	1.64936	up	-	-
MW0104426	2-[(4S,5S,5aS,9aS)-4-methoxy-6,6,9a-trimethyl-5-[(2E,4E,6E)-octa-2,4,6-trienoyl]oxy-1-oxo-4,5,5a,7,8,9-hexahydro-3H-benzo[e]isoindol-2-yl]pentanedioic acid	2-[(4S,5S,5aS,9aS)-4-methoxy-6,6,9a-trimethyl-5-[(2E,4E,6E)-octa-2,4,6-trienoyl]oxy-1- oxo-4,5,5a,7,8,9-hexahydro-3H-benzo[e]isoindol-2-yl]pentanedioic acid	Organic acids	有机酸	Organic acids	有机酸	C29H39NO8	3	0.7239	-	2144.55	2148.1	2686	4848.71	4104.35	10037.4	1.24514	0.163888	0.32877	0.367482	-1.44425	down	-	-
MW0130410	2,4,6-trihydroxy-2-[hydroxy(phenyl)methyl]-2,3-dihydro-1-benzofuran-3-one	2，4，6-三羟基-2-[羟基（苯基）甲基]-2，3-二氢-1-苯并呋喃-3-酮	Benzene and substituted derivatives	苯及其衍生物	Benzene and substituted derivatives	苯及其衍生物	C15H12O6	3	0.7237	-	126912	275229	64283.5	356454	466356	273347	1.09552	0.0673741	0.213594	0.42551	-1.23274	down	-	-
MW0111825	1-Isobutanol	1-异丁醇	Alcohol and amines	醇、胺类	Alcohols	醇类	C21H27NO10	3	0.7234	-	2613.48	2255.16	1002.08	162.72	551.21	335.41	1.28121	0.0745155	0.223643	5.59468	2.48406	up	-	-
MW0108932	N-Undecanoylglycine	N-十一烷酰甘氨酸	Amino acids and derivatives	氨基酸及其衍生物	Amino acids and derivatives	氨基酸及其衍生物	C13H25NO3	3	0.723	-	2012.96	2270.25	2035.83	8392.85	3857.67	6180.61	1.32809	0.0904615	0.243772	0.342846	-1.54437	down	-	-
MEDTP01862	MG(18:4/0:0/0:0)	MG(18:4/0:0/0:0)	GL	甘油脂类	MG	单甘油酯	C21H34O4	3	0.7214	-	20341.5	43019	19632.2	94477.8	41120.1	91616.4	1.17246	0.0923445	0.245758	0.365262	-1.453	down	-	-
MEDN0375	13-HOTE	13S-羟基-9Z,11E,15Z-十八碳三烯酸	Lipids	脂质	Free fatty acids	游离脂肪酸	C18H30O3	3	0.72	-	8637.65	9043.02	8481.1	30071.2	30205.3	40096.9	1.44611	0.0173356	0.129338	0.260644	-1.93985	down	-	-
MW0111912	2-(Hydroxymethyl)-6-(2,4,6-trihydroxyphenyl)oxane-3,4,5-triol	2-(羟甲基)-6-(2，4，6-三羟基苯基）恶烷-3，4，5-三醇	Alcohol and amines	醇、胺类	Alcohols	醇类	C12H16O8	3	0.7187	-	3897.44	4547.63	4926.13	5773.12	19683.5	19956.1	1.16399	0.149574	0.313329	0.294438	-1.76397	down	-	-
MW0133191	3-O-alpha-L-Arabinopyranosylproanthocyanidin A5'	3-O-α-L-阿拉伯吡喃糖基原花青素 A5'	Flavonoids	黄酮	Anthocyanidins	花青素	C35H32O16	3	0.7171	-	6979.47	5922.62	10877.8	18431.3	17151.1	14101.6	1.28615	0.0127259	0.115113	0.478622	-1.06304	down	-	-
MW0131257	3-(3-hydroxyphenyl)-2-(4-hydroxyphenyl)-4-[(E)-2-(4-hydroxyphenyl)ethenyl]-2,3-dihydro-1-benzofuran-5,6-diol	3-(3-羟基苯基)-2-(4-羟基苯基)-4-[（E)-2-(4-羟苯基）乙烯基]-2，3-二氢-1-苯并呋喃-5，6-二醇	Benzene and substituted derivatives	苯及其衍生物	Benzene and substituted derivatives	苯及其衍生物	C28H22O6	3	0.7161	-	4790.73	3039.17	3465.37	1335.64	1234.64	652.18	1.35033	0.0238076	0.143893	3.50517	1.80948	up	-	-
MW0163098	All-trans-heptaprenyl diphosphate(3-)	全反式庚二磷酸(3-)	Organic acids	有机酸	Organic acids	有机酸	C35H57O7P2-3	3	0.7157	-	153043	97748.3	163797	30600.2	43796.8	37146.7	1.3989	0.0348951	0.16159	3.71683	1.89407	up	-	-
MW0060081	PE-NMe(9D3/9D3)	PE-NMe(9D3/9D3)	GP	甘油磷脂类	PE	磷脂酰乙醇胺	C42H72NO10P	3	0.7123	-	41290.7	79697.1	37043.6	15378.7	14020.7	21383.7	1.30368	0.115127	0.274363	3.11189	1.63779	up	-	-
MW0112385	3,4,5-trihydroxy-6-(3-hydroxy-5-methoxybenzoyloxy)oxane-2-carboxylic acid	3，4，5-三羟基-6-(3-羟基-5-甲氧基苯甲酰氧基）恶烷-2-羧酸	Organic acids	有机酸	Organic acids	有机酸	C14H16O10	3	0.7108	-	35160.3	29792.9	24510.4	420.1	2705.8	697.17	1.38377	0.00858663	0.106245	23.401	4.5485	up	-	-
MW0154165	N5-Dinitrophenyl-L-ornithine methyl ester	N5-二硝基苯基-L-鸟氨酸甲酯	Others	其它类	Lactones	内酯类化合物	C18H20N4O6	3	0.7072	-	91588.2	92586.3	102804	7906.27	13907.5	81450.7	1.06579	0.118631	0.277294	2.77907	1.4746	up	C04541	-
MW0167897	Strictosamide ketolactam	去甲酰胺酮内酰胺	Heterocyclic compounds	杂环化合物	Heterocyclic compounds	杂环化合物	C26H30N2O10	3	0.707	-	17905.8	28454	17374	9233.28	8150.04	12268.9	1.28604	0.0750645	0.224275	2.14938	1.10392	up	-	-
MW0013762	3,4,5-Trihydroxy-6-(3-phenylpropoxy)oxane-2-carboxylic acid	3,4,5-三羟基-6-(3-苯基丙氧基）氧烷-2-羧酸	Organic acids	有机酸	Organic acids	有机酸	C15H20O7	3	0.7064	-	45023.6	52135.4	100063	84258	472089	269335	1.09401	0.199976	0.365166	0.238859	-2.06577	down	-	-
MEDP1520	Carnitine C16:2-OH	肉碱 C16:2-OH	FA	脂肪酰类	CAR	酰基肉碱	C23H41NO5	3	0.7062	-	21797	7860.86	23804.3	61739.3	34854.3	29468.2	1.06794	0.120397	0.279274	0.424094	-1.23754	down	-	-
MW0012528	CID 131752883	CID 131752883	Organic acids	有机酸	Organic acids	有机酸	C25H34O12	3	0.7058	-	4348.64	3061.83	2403.64	13191.8	11556.7	12565	1.41814	0.000298848	0.0659656	0.263018	-1.92677	down	-	-
MW0104274	1-Hydroxyoct-2-enoylglycine	1-hydroxyoct-3-enoylglycine	Amino acids and derivatives	氨基酸及其衍生物	Amino acids and derivatives	氨基酸及其衍生物	C10H17NO4	3	0.7048	-	1378.74	1095.83	342.21	1280.76	7905.4	4523.74	1.08839	0.19541	0.361667	0.205456	-2.2831	down	-	-
MW0148303	D-erythritol 1-phosphate	D-赤藓糖醇1-磷酸	Organic acids	有机酸	Organic acids	有机酸	C4H11O7P	3	0.7047	-	115371	64750.5	67950.2	168948	167630	197370	1.32376	0.0126077	0.115113	0.464599	-1.10594	down	C21294	-
MW0013795	3,4,5-Trihydroxy-6-[1-(4-methoxyphenyl)pentan-3-yloxy]oxane-2-carboxylic acid	3，4，5-三羟基-6-{[1-(4-甲氧基苯基）戊烷-3-基]氧}氧杂环己烷-2-羧酸	Organic acids	有机酸	Organic acids	有机酸	C18H26O8	3	0.7042	-	32396.5	20680.2	23723.3	9140.14	12238.1	8899.94	1.36766	0.0380688	0.167896	2.53648	1.34283	up	-	-
MW0166833	Feruloylamaranthin	阿魏酰苋菜红甙	Alkaloids	生物碱	Alkaloids	生物碱	C40H40N2O22-2	3	0.7042	-	10270.4	11905.7	13116.8	2041.06	7731.4	5991.64	1.09072	0.0422763	0.175409	2.23882	1.16274	up	-	-
MW0138100	Eriodictyol 7-(6-galloylglucoside)	圣草酚7-（6-没食子酰葡糖苷）	Flavonoids	黄酮	Flavones	黄酮	C28H26O15	3	0.7037	-	7313.39	8593.46	2781.43	1534.58	1212.96	2708.54	1.17354	0.121683	0.280482	3.42522	1.7762	up	-	-
MEDN1255	LPI(18:2/0:0)	LPI(18:2/0:0)	GP	甘油磷脂类	PI	磷脂酰肌醇	C27H49O12P	3	0.7035	-	825.74	2914.34	2236.6	7742.76	5896.59	9495.75	1.26775	0.0148775	0.121585	0.258338	-1.95267	down	-	-
MW0146414	Atractyloside I	苍术苷I	Terpenoids	萜类	Sesquiterpenoids	倍半萜	C27H44O13	3	0.7009	-	8404.97	8896.19	10709.5	1468.71	357.57	2602.8	1.27523	0.00121718	0.0714974	6.32426	2.6609	up	C17866	-
MW0161401	2,5-dimethyl-4-hydroxy-3(2H)-furanone beta-D-glucopyranoside	2,5-二甲基-4-羟基-3(2H)-呋喃酮β-D-吡喃葡萄糖苷	Others	其它类	Ketone compounds	酮类化合物	C12H18O8	3	0.7006	-	1325.48	896.38	871.37	194.31	642.27	344.39	1.18655	0.0326919	0.157371	2.61923	1.38914	up	-	-
MW0152230	Leu-Arg-Met-Leu-Leu	Leu-Arg-Met-Leu-Leu	Amino acids and derivatives	氨基酸及其衍生物	Amino acids and derivatives	氨基酸及其衍生物	C29H56N8O6S	3	0.6996	-	1784.13	2264.39	1488.4	19753.2	17946	28277.3	1.44565	0.0236282	0.143893	0.0839225	-3.5748	down	-	-
MW0138978	Mono-trans-p-coumaroylmesotartaric acid	单反式对香豆酰基内异酒石酸	Organic acids	有机酸	Organic acids	有机酸	C14H14O8	3	0.6986	-	9234.79	28364.8	15907.7	4233.07	8449.54	7073	1.1275	0.177659	0.34219	2.70846	1.43747	up	-	-
MW0148865	Echitovenine	甲壳素	Alcohol and amines	醇、胺类	Amines	胺类	C23H28N2O4	3	0.6964	-	1177.31	660.26	872.41	1215.11	3805.75	2716.41	1.16293	0.150691	0.314816	0.35025	-1.51354	down	C11784	ko00901,ko01110
MW0160409	(10Z)-1,3,8-trihydroxy-6-methyl-10-(2,4,5-trihydroxy-7-methyl-10-oxo-9-anthrylidene)anthracen-9-one	(10Z)-1,3,8-trihydroxy-6-methyl-10-(2,4,5-trihydroxy-7-methyl-10-oxo-9-anthrylidene)anthracen-9-one	Benzene and substituted derivatives	苯及其衍生物	Benzene and substituted derivatives	苯及其衍生物	C30H20O8	3	0.6951	-	831.19	202.48	433.72	8056.26	7184.18	2642.08	1.34386	0.0808944	0.232415	0.0820572	-3.60723	down	-	-
MW0150091	Glu-Met-Leu-Val-Ala	谷氨酸-蛋氨酸-亮氨酸-缬氨酸-丙氨酸	Amino acids and derivatives	氨基酸及其衍生物	Amino acids and derivatives	氨基酸及其衍生物	C24H43N5O8S	3	0.6937	-	1718.6	5863.49	3720.49	31549.7	33982.5	27579.8	1.38317	0.000608264	0.0671529	0.121387	-3.04232	down	-	-
MW0165972	3-[2-[3-[[(2R)-4-[[[(2R,3S,4R,5R)-5-(6-aminopurin-9-yl)-4-hydroxy-3-phosphonatooxyoxolan-2-yl]methoxy-oxidophosphoryl]oxy-oxidophosphoryl]oxy-2-hydroxy-3,3-dimethylbutanoyl]amino]propanoylamino]ethylsulfanylcarbonyl]-4-oxo-4-phenylbutanoate	3-[2-[3-[[(2R)-4-[[[(2R,3S,4R,5R)-5-(6-aminopurin-9-yl)-4-hydroxy-3-phosphonatooxyoxolan-2 -基]甲氧基-氧化磷酰基]氧基-氧化磷酰基]氧基-2-羟基-3,3-二甲基丁酰基]氨基]丙酰基氨基]乙基硫烷基羰基]-4-氧代-4-苯基丁酸酯	Organic acids	有机酸	Organic acids	有机酸	C32H39N7O20P3S-5	3	0.6935	-	831942	990753	748197	91251	69180.6	250245	1.35117	0.00168	0.0792302	6.26013	2.64619	up	-	-
MW0112701	2-(3,4-Dimethoxyphenoxy)-6-[(3,4,5-trihydroxyoxan-2-yl)oxymethyl]oxane-3,4,5-triol	2-(3,4-二甲氧基苯氧基)-6-[(3,4,5-trihydroxyoxan-2-yl)oxymethyl]oxane-3,4,5-triol	Benzene and substituted derivatives	苯及其衍生物	Benzene and substituted derivatives	苯及其衍生物	C19H28O12	3	0.6934	-	6355.83	7903.44	10756.4	3305.62	3374.64	3234.73	1.38956	0.0596089	0.203838	2.52301	1.33515	up	-	-
MW0150321	Gly-Asp-Asn	甘氨酸-天门冬氨酸-天门冬酰氨	Amino acids and derivatives	氨基酸及其衍生物	Amino acids and derivatives	氨基酸及其衍生物	C10H16N4O7	3	0.693	-	7977	6269.43	6262.04	3263.61	1949.44	1782.68	1.37076	0.00411394	0.0926636	2.93157	1.55167	up	-	-
MW0146412	Atractyloside G	苍术苷G	Terpenoids	萜类	Sesquiterpenoids	倍半萜	C21H36O8	3	0.6924	-	3619.9	3144.61	6017.47	8242.32	10694.2	21323.1	1.23741	0.144367	0.307842	0.317488	-1.65522	down	C17864	-
MW0147080	Carapin-8(9)-ene	Carapin-8(9)-烯	Others	其它类	Hydrocarbon derivatives	烃衍生物	C27H30O7	3	0.6922	-	14832.3	8723.74	5231.44	35031.6	14416.1	19462.6	1.09488	0.151304	0.31573	0.417754	-1.25928	down	-	-
MEDL01052	Glycerophosphoric acid	甘油磷酸	GP	甘油磷脂类	PA	磷脂酸	C3H9O6P	3	0.6912	-	69873.1	45427.6	31440	106581	110869	128980	1.30452	0.0117071	0.112902	0.42358	-1.2393	down	C03189	-
MW0127719	({6-[5,7-dihydroxy-2-(4-hydroxyphenyl)-4-oxo-3,4-dihydro-2H-1-benzopyran-8-yl]-3,4,5-trihydroxyoxan-2-yl}methoxy)sulfonic acid	（{6-[5，7-二羟基-2-(4-羟基苯基)-4-氧代-3，4-二氢-2H-1-苯并吡喃-8-基]-3，4，5-三羟基恶烷-2-基}甲氧基）磺酸	Organic acids	有机酸	Organic acids	有机酸	C21H22O13S	3	0.6911	-	29336.2	56375.8	66152.4	766.77	8650.41	2459.36	1.30132	0.0458678	0.180949	12.7869	3.6766	up	-	-
MW0150961	His-His-Ser-Lys-His	组氨酸-组氨酸-丝氨酸-赖氨酸-组氨酸	Amino acids and derivatives	氨基酸及其衍生物	Amino acids and derivatives	氨基酸及其衍生物	C27H40N12O7	3	0.6902	-	17885.4	17068.7	15659.6	48741.2	28238.4	41886.8	1.35292	0.0619557	0.207159	0.425803	-1.23174	down	-	-
MW0150432	Gly-Lys-Val-Lys-Lys	甘氨酸-赖氨酸-缬氨酸-赖氨酸-赖氨酸	Amino acids and derivatives	氨基酸及其衍生物	Amino acids and derivatives	氨基酸及其衍生物	C25H50N8O6	3	0.6901	-	2482.38	1030.2	1150.54	3954.66	2109.1	5148.58	1.11649	0.115934	0.275068	0.415892	-1.26572	down	-	-
ZINC40915745	4-O-(4''-O-Acetyl-alpha-L-rhamnopyranosyl)ellagic acid	[（2S，3R，4S，5R，6S)-4，5-二羟基-2-甲基-6-[（7，13，14-三羟基-3，10-二氧代-2，9-二氧杂四环[6.6.2.04，16.011，15]十六-1（15）4，6，8（16）11，13-己烯-6-基）氧]恶烷-3-基]乙酸酯	Others	其它类	Lactones	内酯类化合物	C22H18O13	3	0.6897	-	1025.58	832.52	669.38	2592.34	3247.71	1829.28	1.36877	0.0455373	0.180438	0.329557	-1.6014	down	-	-
MW0149609	Gln-Ala-Gln-Ile-Glu	Gln-Ala-Gln-Ile-Glu	Amino acids and derivatives	氨基酸及其衍生物	Amino acids and derivatives	氨基酸及其衍生物	C24H41N7O10	3	0.6897	-	4021.84	6595.15	5054.21	1883.71	1265.86	2129.17	1.36289	0.0326345	0.157371	2.96874	1.56985	up	-	-
MW0153965	Morphine Modulating Peptide,C-Terminal Fragment	Morphine Modulating Peptide,C-Terminal Fragment	Benzene and substituted derivatives	苯及其衍生物	Benzene and substituted derivatives	苯及其衍生物	C25H39N9O5	3	0.6891	-	891.24	859	671.79	2214.91	3730.89	2012.66	1.3751	0.0743135	0.223222	0.304334	-1.71627	down	-	-
MW0000617	(2E)-4-[(3-carbamoylphenyl)amino]-4-oxobut-2-enoic acid	(2E)-4-[(3-氨基甲酰基苯基)氨基]-4-氧代丁-2-烯酸	Benzene and substituted derivatives	苯及其衍生物	Benzene and substituted derivatives	苯及其衍生物	C11H10N2O4	3	0.6881	-	17119.3	35978.4	19488	6035.17	5893.44	15340.6	1.16051	0.108706	0.267021	2.66182	1.41241	up	-	-
MW0152468	Leu-Pro-Glu-Phe-Tyr	Leu-Pro-Glu-Phe-Tyr	Amino acids and derivatives	氨基酸及其衍生物	Amino acids and derivatives	氨基酸及其衍生物	C34H45N5O9	3	0.6861	-	6573.91	5280.43	3679.62	10645.5	9944.8	23659.3	1.23089	0.160928	0.326073	0.351054	-1.51024	down	-	-
MW0156876	Ser-Phe-Leu	L-丝氨酰-L-苯丙氨酰-L-亮氨酸	Amino acids and derivatives	氨基酸及其衍生物	Amino acids and derivatives	氨基酸及其衍生物	C18H27N3O5	3	0.686	-	23238.1	44668.1	32017	18315.6	15712.4	7461.38	1.18522	0.068753	0.215209	2.4084	1.26808	up	-	-
MW0145653	Asn-Ala-Asp	L-天冬酰胺-L-丙氨酰-L-天冬氨酸	Amino acids and derivatives	氨基酸及其衍生物	Amino acids and derivatives	氨基酸及其衍生物	C11H18N4O7	3	0.6828	-	9317.81	5288.43	2919.44	13806.6	13015.3	14308.7	1.20905	0.0471252	0.182362	0.426099	-1.23074	down	-	-
MW0145339	Arg-Glu-Ala-Phe-Arg	Arg-Glu-Ala-Phe-Arg	Amino acids and derivatives	氨基酸及其衍生物	Amino acids and derivatives	氨基酸及其衍生物	C29H47N11O8	3	0.6815	-	12002.9	18061.1	16288.1	20145.7	34091.2	53159.9	1.15165	0.163329	0.328499	0.431597	-1.21224	down	-	-
MW0148216	Deinoxanthin	去甲黄黄素	Others	其它类	Ketone compounds	酮类化合物	C40H54O3	3	0.6814	-	8101.21	7998.74	11530.1	30969.5	62556	32400.8	1.37708	0.0843996	0.237481	0.219415	-2.18827	down	-	-
MW0149969	Glu-Gln-Asn	古氨酸-谷酰胺-天门冬酰氨	Amino acids and derivatives	氨基酸及其衍生物	Amino acids and derivatives	氨基酸及其衍生物	C14H23N5O8	3	0.6806	-	72151.1	94511.9	103516	41650.9	43565.3	33796	1.39372	0.0239099	0.143893	2.27018	1.1828	up	-	-
MW0157791	Thr-Pro-Trp	苏氨酸-脯氨酸-色氨酸	Amino acids and derivatives	氨基酸及其衍生物	Amino acids and derivatives	氨基酸及其衍生物	C20H26N4O5	3	0.6794	-	4102.5	4687.11	4678.11	38759.4	50032.9	26348.6	1.43468	0.0383033	0.168303	0.116967	-3.09582	down	-	-
MW0157841	Thr-Tyr-His-Asp	Thr-Tyr-His-Asp	Amino acids and derivatives	氨基酸及其衍生物	Amino acids and derivatives	氨基酸及其衍生物	C23H30N6O9	3	0.6793	-	10469.7	2160.17	4194.28	13446.1	10277.8	10605	1.02854	0.131588	0.292279	0.490086	-1.02889	down	-	-
MW0159246	Val-Val-Trp	缬氨酸-缬氨酸-色氨酸	Amino acids and derivatives	氨基酸及其衍生物	Amino acids and derivatives	氨基酸及其衍生物	C21H30N4O4	3	0.6791	-	17235.6	33050.3	14318.8	5538.65	2396.82	6097.16	1.30085	0.0961519	0.250643	4.60389	2.20285	up	-	-
MW0144792	Ala-Val-Asp-Asp	Ala-Val-Asp-Asp	Amino acids and derivatives	氨基酸及其衍生物	Amino acids and derivatives	氨基酸及其衍生物	C16H26N4O9	3	0.6773	-	50489.7	60330	91574	19902.4	41373.5	22641.3	1.23684	0.0655547	0.211968	2.41182	1.27013	up	-	-
MW0143173	4,4'-(2,3-Dimethyl-1,4-butanediyl)bis(2-methoxyphenol)	4,4'-(2,3-Dimethyl-1,4-butanediyl)bis(2-methoxyphenol)	Benzene and substituted derivatives	苯及其衍生物	Benzene and substituted derivatives	苯及其衍生物	C20H26O4	3	0.6769	-	12222.2	13076.6	14277.2	36176.9	29264.3	39171.6	1.42842	0.0148837	0.121585	0.378309	-1.40236	down	-	-
MW0149669	Gln-Gln-Ile	谷酰氨-谷酰氨-异亮氨酸	Amino acids and derivatives	氨基酸及其衍生物	Amino acids and derivatives	氨基酸及其衍生物	C16H29N5O6	3	0.6768	-	14130.2	16019.6	16466.1	2065.71	3770.01	7547.46	1.27614	0.0105839	0.112223	3.48317	1.8004	up	-	-
MW0148855	Ecdysone palmitate	棕榈酸蜕皮激素	Lipids	脂质	Free fatty acids	游离脂肪酸	C43H74O7	3	0.6767	-	10277.2	15873.1	8287.79	872.8	4229.69	3758.08	1.18058	0.0464135	0.181137	3.88667	1.95854	up	C02681	-
MW0146357	Aspartylisoleucine	Asp Ile	Amino acids and derivatives	氨基酸及其衍生物	Amino acids and derivatives	氨基酸及其衍生物	C10H18N2O5	3	0.6752	-	3651.04	2919.95	3911.37	1204.34	657.73	2679.27	1.11665	0.0625561	0.207923	2.30821	1.20677	up	-	-
MW0152949	Lys-Glu-Arg-Phe-Ala	Lys-Glu-Arg-Phe-Ala	Amino acids and derivatives	氨基酸及其衍生物	Amino acids and derivatives	氨基酸及其衍生物	C29H47N9O8	3	0.6719	-	186.39	10096.3	9434.75	23828.6	56624.9	66631.7	1.04541	0.0738623	0.222489	0.134055	-2.89911	down	-	-
MW0152218	Leu-Arg-Asp-Leu-Tyr	Leu-Arg-Asp-Leu-Tyr	Amino acids and derivatives	氨基酸及其衍生物	Amino acids and derivatives	氨基酸及其衍生物	C31H50N8O9	3	0.6716	-	60093.6	50453.1	50888.3	96996.4	102889	132578	1.39946	0.0277947	0.151014	0.485572	-1.04224	down	-	-
MW0144777	Ala-Tyr-Ile	L-丙氨酰-L-酪氨酰-L-异亮氨酸	Amino acids and derivatives	氨基酸及其衍生物	Amino acids and derivatives	氨基酸及其衍生物	C18H27N3O5	3	0.671	-	62893	43405.5	37312.3	15906.9	25943.8	21028.8	1.28857	0.0589815	0.202623	2.2839	1.1915	up	-	-
MW0136928	7-{4-[(6-carboxy-3,4,5-trihydroxyoxan-2-yl)oxy]-3,5-dimethoxyphenyl}-6,11-dihydroxy-3-(4-hydroxyphenyl)-2lambda8-dioxatricyclo[7.3.1.0,(1)(3)]trideca-1(13),2,4,6,9,11-hexaen-2-ylium	7-{4-[(6-carboxy-3,4,5-trihydroxyoxan-2-yl)oxy]-3,5-dimethoxyphenyl}-6,11-dihydroxy-3-(4-hydroxyphenyl)-2lambda8-dioxatricyclo[7.3.1.0,(1)(3)]trideca-1(13),2,4,6,9,11-hexaen-2-ylium	Flavonoids	黄酮	Flavonoid	黄酮	C31H27O14	3	0.671	-	1382.32	8430.57	4010.35	34734.4	46235.8	7124.88	1.1005	0.162907	0.328076	0.156913	-2.67197	down	-	-
MW0105855	Asp-Glu-Lys	L-天冬氨酰-L-谷氨酰-L-赖氨酸	Amino acids and derivatives	氨基酸及其衍生物	Amino acids and derivatives	氨基酸及其衍生物	C15H26N4O8	3	0.6684	-	66273.9	71441.6	62703.8	24384.6	23010.8	26356.8	1.4499	0.0012942	0.0714974	2.71747	1.44226	up	-	-
MW0136912	7-{[3,4-dihydroxy-6-(hydroxymethyl)-5-{[3,4,5-trihydroxy-6-(hydroxymethyl)oxan-2-yl]oxy}oxan-2-yl]oxy}-5-hydroxy-2-(4-hydroxyphenyl)-3-{[3,4,5-trihydroxy-6-(hydroxymethyl)oxan-2-yl]oxy}-4H-chromen-4-one	7-{[3,4-二羟基-6-(羟甲基)-5-{[3,4,5-三羟基-6-(羟甲基）氧代-2-基]氧基}-5-羟基-2-(4-羟基苯基)-3-{[3,4,5-三羟基-6-(羟甲基）氧代-2-基]氧基]-4H-铬-4-酮	Others	其它类	Ketone compounds	酮类化合物	C33H40O21	3	0.6679	-	98539.5	22024.1	11163.6	227329	279032	187592	1.24474	0.00801447	0.103511	0.189822	-2.39728	down	-	-
MW0003079	2-hydroxy-2-(4-hydroxyphenyl)ethyl(2Z)-2-hydroxy-3-(4-hydroxy-3-methoxyphenyl)prop-2-enoate	2-hydroxy-2-(4-hydroxyphenyl)ethyl(2Z)-2-hydroxy-3-(4-hydroxy-3-methoxyphenyl)prop-2-enoate	Others	其它类	Lactones	内酯类化合物	C18H18O7	3	0.6675	-	62338.1	53928	65774	19471.6	16412.2	36570.3	1.29692	0.0131284	0.115688	2.51249	1.32912	up	-	-
MW0157601	Thr-Cys-Tyr-Thr-Tyr	Thr-Cys-Tyr-Thr-Tyr	Amino acids and derivatives	氨基酸及其衍生物	Amino acids and derivatives	氨基酸及其衍生物	C29H39N5O10S	3	0.6675	-	47380	218366	229688	66577	35468.8	33528.9	1.05247	0.17539	0.339229	3.65432	1.8696	up	-	-
MW0158563	Tyr-Phe-Asp	酪氨酸-苯丙氨酸-天冬氨酸	Amino acids and derivatives	氨基酸及其衍生物	Amino acids and derivatives	氨基酸及其衍生物	C22H25N3O7	3	0.6667	-	68212	42718.9	45116.8	111075	102342	101689	1.35363	0.0139499	0.118984	0.495222	-1.01385	down	-	-
MW0143724	6-(3,3-Dimethylallyl)galangin	6-(3，3-DMA）高良姜素；6-(3，3-二甲基烯丙基）高良姜素	Flavonoids	黄酮	Flavones	黄酮	C20H18O5	3	0.6663	-	9738.78	8323.14	12276.8	16613.4	34629.9	42303.7	1.27008	0.106364	0.264787	0.324315	-1.62453	down	-	-
MW0146110	Asp-Glu-Val-Phe-Asp	Asp-Glu-Val-Phe-Asp	Amino acids and derivatives	氨基酸及其衍生物	Amino acids and derivatives	氨基酸及其衍生物	C27H37N5O12	3	0.6657	-	828335	1.20454e+06	881093	354537	388940	670803	1.23972	0.0329631	0.157371	2.06039	1.04292	up	-	-
Zmhn001358	4-O-Glucosyl-4-hydroxybenzoic acid	4-O-葡萄糖基-4-羟基苯甲酸	Phenolic acids	酚酸类	Phenolic acids	酚酸类	C13H16O8	3	0.6654	-	103206	82905.2	93391	24910.6	39785.3	34872.6	1.39667	0.00167083	0.0792302	2.80713	1.4891	up	-	-
MW0150814	His-Ala-Glu-Asp-Gly	组氨酸-丙氨酸-谷氨酸-天门冬氨酸-甘氨酸	Amino acids and derivatives	氨基酸及其衍生物	Amino acids and derivatives	氨基酸及其衍生物	C20H29N7O10	3	0.6648	-	14349.4	9209.14	8559.32	35317.4	31069.2	34682.1	1.40922	0.000837792	0.0686411	0.317783	-1.65389	down	-	-
MW0111527	alpha-(beta-D-Glucopyranosyloxy)-4-hydroxybenzeneacetonitrile	α-(β-D-吡喃葡萄糖基氧基)-4-羟基苯乙腈	Heterocyclic compounds	杂环化合物	Heterocyclic compounds	杂环化合物	C14H17NO7	3	0.6646	-	1532.46	4105.22	7490.91	1014.94	1158.92	90.12	1.07909	0.166518	0.330867	5.7989	2.53578	up	-	-
MW0158719	Tyr-Nap-OH	Tyr-Nap-OH	Amino acids and derivatives	氨基酸及其衍生物	Amino acids and derivatives	氨基酸及其衍生物	C28H24N2O7	3	0.6639	-	8254	17671.7	10761.7	68845.9	55346.2	17371.5	1.14692	0.147336	0.31131	0.259159	-1.94809	down	-	-
ZINC95909975	D-Friedoolean-14-ene-3beta-ol 3-[(E)-3-(3,4-dihydroxyphenyl)acrylate]	[（3S，4aR，6aR，6aS，8aR，12aR14aR14bR)-4，4，6a，6a，8A，11，11，14b-八甲基-1，2，3，4A，5，6，8，9，10，12，12A，13，14，14a-十四氢吡啶-3-基]（E)-3-(3，4-二羟基苯基）丙-2-烯酸酯	Others	其它类	Lactones	内酯类化合物	C39H56O4	3	0.6636	-	11477.9	14807.4	9951.41	5593.44	5121.57	4693.85	1.39708	0.0364533	0.165018	2.35168	1.23369	up	-	-
ZINC95914900	3-[(1S,4R,7S,10S,13S,16S)-24-methoxy-10-[(4-methoxyphenyl)methyl]-4,9,13,15,29-pentamethyl-2,5,8,11,14,30-hexaoxo-22-oxa-3,6,9,12,15,29-hexazatetracyclo[14.12.2.218,21.123,27]tritriaconta-18,20,23,25,27(31),32-hexaen-7-yl]propanoic acid	3-[（1S，4R，7S，10S，13S，16S)-24-甲氧基-10-[（4-甲氧基苯基）甲基]-4，9，13，15，29-五甲基-2，5，8，11，14，30-六氧代-22-氧杂-3，6，9，12，15，29-六氮杂四环[14.1 2.2.218，21.123，27]三十三烷-18，20，23，25，27（31）32-六烯-7	Organic acids	有机酸	Organic acids	有机酸	C43H52N6O11	3	0.6627	-	430703	567660	546362	192863	242806	217852	1.41635	0.012787	0.115113	2.3637	1.24104	up	-	-
MW0163480	(1R)-1-[[(2S,3R,11bS)-3-ethyl-9,10-dimethoxy-1,2,3,4,5,6,7,11b-octahydrobenzo[a]quinolizin-5-ium-2-yl]methyl]-7-methoxy-1,2,3,4-tetrahydroisoquinolin-2-ium-6-ol	(1R)-1-[[(2S,3R,11bS)-3-ethyl-9,10-dimethoxy-1,2,3,4,5,6,7,11b-octahydrobenzo[a]quinolizin-5-ium-2-yl]methyl]-7-methoxy-1,2,3,4-tetrahydroisoquinolin-2-ium-6-ol	Benzene and substituted derivatives	苯及其衍生物	Benzene and substituted derivatives	苯及其衍生物	C28H40N2O4+2	3	0.6622	-	337.17	1252.35	1284.61	1944.06	1798.67	3188.03	1.05029	0.0733051	0.222456	0.414692	-1.26989	down	-	-
MW0158493	Tyr-His-Val	酪氨酸-组氨酸-缬氨酸	Amino acids and derivatives	氨基酸及其衍生物	Amino acids and derivatives	氨基酸及其衍生物	C20H27N5O5	3	0.6616	-	110197	194495	91253.3	41458.5	70578.2	62893.5	1.18356	0.137815	0.300009	2.26345	1.17852	up	-	-
MW0006149	Tacedinaline	他西地那林	Benzene and substituted derivatives	苯及其衍生物	Benzene and substituted derivatives	苯及其衍生物	C15H15N3O2	3	0.6607	-	138.3	6721.66	8143.88	34483.9	36740.7	31822.6	1.05616	0.0014685	0.0748773	0.145602	-2.7799	down	-	-
MW0132951	3-[5,7-dihydroxy-2-(4-hydroxy-3-methoxyphenyl)-4-oxo-3,4-dihydro-2H-1-benzopyran-8-yl]-5,7-dihydroxy-2-phenyl-3,4-dihydro-2H-1-benzopyran-4-one	3-[5，7-二羟基-2-(4-羟基-3-甲氧基苯基)-4-氧代-3，4-二氢-2H-1-苯并吡喃-8-基]-5，7-二羟基-2-苯基-3，4-二氢-2H-1-苯并吡喃-4-酮	Benzene and substituted derivatives	苯及其衍生物	Benzene and substituted derivatives	苯及其衍生物	C31H24O10	3	0.6603	-	43859.9	31933.7	24232.2	82476.9	68233.5	87206.5	1.35383	0.00469313	0.0969504	0.420423	-1.25009	down	-	-
MW0150890	His-Cys-Tyr	组氨酸-半胱氨酸-酪氨酸	Amino acids and derivatives	氨基酸及其衍生物	Amino acids and derivatives	氨基酸及其衍生物	C18H23N5O5S1	3	0.6587	-	7623.46	5352.84	5986.18	2803.69	2538.14	3404.14	1.3723	0.0255948	0.147162	2.16814	1.11646	up	-	-
MW0151378	Ile-Asp-Val	L-异亮氨酸-L-天冬氨酸-L-缬氨酸	Amino acids and derivatives	氨基酸及其衍生物	Amino acids and derivatives	氨基酸及其衍生物	C15H27N3O6	3	0.6584	-	17544.4	22068.8	18830.1	246.8	216.33	2986.75	1.31261	0.000686149	0.067739	16.9407	4.08242	up	-	-
MW0110042	Tris(2-butoxyethyl) phosphate	磷酸三（丁氧乙基）酯	Others	其它类	Lactones	内酯类化合物	C18H39O7P	3	0.6581	-	55874.6	85729.9	80494.8	19265.9	32405.5	28133	1.3569	0.0226315	0.142497	2.78305	1.47667	up	C14446	-
ZINC95914901	3-[(1S,4R,7S,10S,13S,16S)-24-hydroxy-10-[(4-methoxyphenyl)methyl]-4,9,13,15,29-pentamethyl-2,5,8,11,14,30-hexaoxo-22-oxa-3,6,9,12,15,29-hexazatetracyclo[14.12.2.218,21.123,27]tritriaconta-18,20,23,25,27(31),32-hexaen-7-yl]propanoic acid	3-[(1S,4R,7S,10S,13S,16S)-24-hydroxy-10-[(4-methoxyphenyl)methyl]-4,9,13,15,29-pentamethyl-2,5,8,11,14,30-hexaoxo-22-oxa-3,6,9,12,15,29-hexazatetracyclo[14. 12.2.218,21.123,27]tritriaconta-18,20,23,25,27(31),32-hexaen-7-yl]propanoic acid	Organic acids	有机酸	Organic acids	有机酸	C42H50N6O11	3	0.6577	-	11051.1	21245.2	23027	6966.04	9574.43	2831.6	1.16456	0.0647718	0.210758	2.85582	1.51391	up	-	-
MW0148036	Cys-Lys-His	半胱氨酸-赖氨酸-组氨酸	Amino acids and derivatives	氨基酸及其衍生物	Amino acids and derivatives	氨基酸及其衍生物	C15H26N6O4S1	3	0.657	-	54237.7	67408.4	60133.9	28318.9	31887.9	27169.5	1.42821	0.00782145	0.10294	2.08043	1.05688	up	-	-
MW0121138	5-benzyl-5-(pyridin-3-yl)imidazolidine-2,4-dione	5-苄基-5-（吡啶-3-基）咪唑啉-2,4-二酮	Benzene and substituted derivatives	苯及其衍生物	Benzene and substituted derivatives	苯及其衍生物	C15H13N3O2	3	0.6565	-	238433	259290	289052	772820	795264	897758	1.44689	0.00182988	0.0797717	0.319069	-1.64806	down	-	-
MW0144704	Ala-Pro-Ala	L-丙氨酰-L-脯氨酰-L-丙氨酸	Amino acids and derivatives	氨基酸及其衍生物	Amino acids and derivatives	氨基酸及其衍生物	C11H19N3O4	3	0.6559	-	54574.4	49697.3	55402.6	141280	143738	153132	1.45495	0.000215109	0.0659656	0.364428	-1.45629	down	-	-
MW0055603	PA(15:0/22:5(4Z,7Z,10Z,13Z,16Z))	PA(15:0/22:5(4Z,7Z,10Z,13Z,16Z))	GP	甘油磷脂类	PA	磷脂酸	C40H69O8P	3	0.6548	-	45878.3	30500.7	49308.1	3370.46	3370.19	3816.37	1.44839	0.0219015	0.140802	11.9055	3.57356	up	-	-
MW0146162	Asp-Ile-Val	L-天冬氨酰-L-异亮氨酰-L-缬氨酸	Amino acids and derivatives	氨基酸及其衍生物	Amino acids and derivatives	氨基酸及其衍生物	C15H27N3O6	3	0.6535	-	9609.92	9992.53	13692.5	82161.2	88471.3	75099.7	1.44655	0.00126148	0.0714974	0.135493	-2.88371	down	-	-
MW0150110	Glu-Phe-Ser-Glu	谷氨酸-苯丙氨酸-丝氨酸-谷氨酸	Amino acids and derivatives	氨基酸及其衍生物	Amino acids and derivatives	氨基酸及其衍生物	C22H30N4O10	3	0.6533	-	1298.81	822.45	396.22	6237.43	9150.33	4155.02	1.36493	0.0552955	0.196005	0.128819	-2.95658	down	-	-
MW0165831	4-amino-demethoxy-Q6H2	4-氨基-去甲氧基-Q6H2	Alcohol and amines	醇、胺类	Alcohols	醇类	C38H59NO2	3	0.6531	-	24018.3	8870.45	7360.08	16337.4	70535	49021	1.06963	0.171348	0.336887	0.29618	-1.75546	down	-	-
MW0110174	Tumonoic acid A	Tumonoic acid A	Organic acids	有机酸	Organic acids	有机酸	C19H33NO4	3	0.6523	-	28803.7	37471.4	25774.4	102108	90842.2	120218	1.42648	0.00633714	0.101413	0.29393	-1.76646	down	-	-
MW0156913	Ser-Ser-Thr	丝氨酰-丝氨酰-苏氨酸	Amino acids and derivatives	氨基酸及其衍生物	Amino acids and derivatives	氨基酸及其衍生物	C10H19N3O7	3	0.6518	-	14312	12313.1	11194.1	36281.2	21975.2	22496.4	1.3118	0.0874369	0.240348	0.468332	-1.0944	down	-	-
MW0144506	Ala-Asn-Val-Asp	Ala-Asn-Val-Asp	Amino acids and derivatives	氨基酸及其衍生物	Amino acids and derivatives	氨基酸及其衍生物	C16H27N5O8	3	0.6505	-	21630.5	24947.3	20237	42948.3	54969.6	36050.2	1.35586	0.0485462	0.184786	0.498737	-1.00365	down	-	-
MW0017014	CerP(d18:1/12:0)	N-(十二烷酰基）鞘氨四烯-1-磷酸	SL	鞘脂类	Cer	神经酰胺	C30H60NO6P	3	0.6505	-	17113.8	27774.9	21922.9	24136.7	208650	99779.8	1.03726	0.239629	0.405499	0.200897	-2.31547	down	-	-
MW0155849	Pro-Glu-Glu	脯氨酰-谷氨酰-谷氨酸	Amino acids and derivatives	氨基酸及其衍生物	Amino acids and derivatives	氨基酸及其衍生物	C15H23N3O8	3	0.6499	-	281596	287637	296237	143481	107207	146579	1.41483	0.00330298	0.0850936	2.17857	1.12338	up	-	-
MW0145995	Asn-Trp	Asn Trp	Amino acids and derivatives	氨基酸及其衍生物	Amino acids and derivatives	氨基酸及其衍生物	C15H18N4O4	3	0.6486	-	126906	116195	122910	61873.4	67046.4	33987.6	1.30529	0.0157178	0.123348	2.24674	1.16783	up	-	-
MW0141201	1-[2-Hydroxy-3-(4-phenoxyphenoxy)propyl]-3-(2-methylpropanoyl)-1H-indole-5-carboxylic acid	1-[2-羟基-3-(4-苯氧基苯氧基)丙基]-3-(2-甲基丙酰基)-1H-吲哚-5-羧酸	Benzene and substituted derivatives	苯及其衍生物	Benzene and substituted derivatives	苯及其衍生物	C28H27NO6	3	0.6479	-	8134.74	3117.56	4373.5	16696.6	22394	9431.86	1.22351	0.0843113	0.237381	0.322032	-1.63472	down	-	-
MW0132768	[2-methoxy-4-(3,5,6-trihydroxy-7-sulinooxy-3,4-dihydro-2H-chromen-2-yl)phenyl] hydrogen sulate	3，6-二羟基-2-[3-甲氧基-4-(磺酰氧基）苯基]-7-(磺酰氧基)-3，4-二氢-2H-1-苯并吡喃-5-醇盐	Benzene and substituted derivatives	苯及其衍生物	Benzene and substituted derivatives	苯及其衍生物	C16H16O12S2	3	0.6477	-	5614.2	5382.94	4935.41	25988.1	18119.6	22832.6	1.44183	0.0170098	0.127974	0.238011	-2.0709	down	-	-
MW0152914	Lys-Asp-Trp-Ser-Phe	Lys-Asp-Trp-Ser-Phe	Amino acids and derivatives	氨基酸及其衍生物	Amino acids and derivatives	氨基酸及其衍生物	C33H43N7O9	3	0.6472	-	58438.3	30845.9	50195	22995.3	22263	17342.3	1.28019	0.0823691	0.2339	2.22808	1.1558	up	-	-
MW0108623	L-Asparagine, N-[2-(acetylamino)-2-deoxy-beta-D-glucopyranosyl]-	L-天冬酰胺，N-[2-(乙酰氨基)-2-脱氧-β-D-吡喃葡萄糖基]-	Amino acids and derivatives	氨基酸及其衍生物	Amino acids and derivatives	氨基酸及其衍生物	C12H21N3O8	3	0.645	-	5008.03	8958.73	4972.44	8323.83	10407.3	24004.9	1.03339	0.244053	0.40875	0.443167	-1.17408	down	-	-
MW0144701	Ala-Phe-Tyr	L-丙氨酰-L-苯丙氨酰-L-酪氨酸	Amino acids and derivatives	氨基酸及其衍生物	Amino acids and derivatives	氨基酸及其衍生物	C21H25N3O5	3	0.6432	-	24489.5	25905.9	26553	82159.5	68315.1	75653.9	1.44916	0.00551747	0.099615	0.340286	-1.55518	down	-	-
MW0112359	3,4,5-trihydroxy-6-({3-oxo-3-[(3,4,5,6-tetrahydroxyoxan-2-yl)methoxy]propanoyl}oxy)oxane-2-carboxylic acid	3,4,5-三羟基-6-({3-氧代-3-[（3,4,5,6-四羟基氧烷-2-基）甲氧基]丙酰基}氧基）氧烷-2-羧酸	Organic acids	有机酸	Organic acids	有机酸	C15H22O15	3	0.643	-	4226.77	2536.65	1986.95	20118.3	20629.4	9709.62	1.36696	0.0551619	0.196005	0.173421	-2.52765	down	-	-
MW0153055	Lys-Lys-Gln	L-赖氨酸-L-赖氨酸-L-谷氨酰胺	Amino acids and derivatives	氨基酸及其衍生物	Amino acids and derivatives	氨基酸及其衍生物	C17H34N6O5	3	0.6418	-	1478.34	1193.62	1739.57	29002.6	19338	32907.9	1.44585	0.0237664	0.143893	0.0542967	-4.20299	down	-	-
MW0112109	2-Decarboxybetanin	2-脱羧甜菜碱	Others	其它类	Others	其它	C23H27N2O11	3	0.6414	-	15486	14171.2	16461.4	9069.32	4271.85	9240.25	1.21631	0.0271847	0.150223	2.04232	1.03021	up	-	-
Zmpn004068	Phloretin-2'-O-(6''-O-xylosyl)glucoside	根皮素-2'-O-(6''-O-木糖基)葡萄糖苷	Flavonoids	黄酮	Chalcones	查耳酮	C26H32O14	3	0.641	-	11351.4	11536.4	11786.6	758.12	775.3	1506.29	1.43466	4.21922e-05	0.0489429	11.4072	3.51187	up	-	-
MEDL02614	Gancaonin D	甘草宁 D	Flavonoids	黄酮	Isoflavones	异黄酮	C21H20O7	3	0.6409	-	33099.1	37465.8	32987	4222.14	6730.01	25910.2	1.12384	0.0772208	0.227206	2.80915	1.49013	up	-	-
MW0131477	3,4,5-trihydroxy-2,8-bis(3,5,7-trihydroxy-3,4-dihydro-2H-1-benzopyran-2-yl)-6H-benzo[7]annulen-6-one	3,4,5-三羟基-2,8-双（3,5,7-三羟基-3,4-二氢-2H-1-苯并吡喃-2-基)-6H-苯并[7]环烯-6-酮	Benzene and substituted derivatives	苯及其衍生物	Benzene and substituted derivatives	苯及其衍生物	C29H24O12	3	0.6401	-	130564	120512	122651	21821.4	31649.8	92813	1.15078	0.0735113	0.222489	2.5548	1.35321	up	-	-
MW0148738	dTDP-4-amino-4,6-dideoxy-5-C-methyl-L-mannose	DTDP-4-氨基-4，6-二脱氧-5-C-甲基-D-阿洛糖	Nucleotides and derivatives	核苷酸及其衍生物	Nucleotides and derivatives	核苷酸及其衍生物	C17H29N3O14P2	3	0.6401	-	1.13012e+07	9.24398e+06	1.10004e+07	1.91197e+06	2.61458e+06	7.81382e+06	1.15186	0.0623774	0.207626	2.55629	1.35405	up	C11461	ko00523,ko01110
MW0056792	PC(14:0/18:4(6Z,9Z,12Z,15Z))	PC(14:0/18:4(6Z,9Z,12Z,15Z))	GP	甘油磷脂类	PC	磷脂酰胆碱	C40H72NO8P	3	0.6392	-	103002	60479.6	47483.6	96855	112992	217746	1.06348	0.187883	0.354813	0.493379	-1.01923	down	-	-
MW0105632	Antanapeptin A	安他肽A	Benzene and substituted derivatives	苯及其衍生物	Benzene and substituted derivatives	苯及其衍生物	C41H60N4O8	3	0.6388	-	1474.99	12508.2	1348.67	127897	81334.3	43986	1.31283	0.0790837	0.229911	0.0605481	-4.04577	down	-	-
MW0150258	Limonin 17-beta-D-glucopyranoside	葡糖基-柠檬苦素；柠檬苦素17-β-D-葡萄糖苷	Benzene and substituted derivatives	苯及其衍生物	Benzene and substituted derivatives	苯及其衍生物	C32H42O14	3	0.6388	-	108853	41057	42580.8	21027.8	26991.8	29282.2	1.11324	0.226855	0.392736	2.49011	1.31621	up	C06740	-
MW0152453	Leu-Phe-Lys-Lys	Leu-Phe-Lys-Lys	Amino acids and derivatives	氨基酸及其衍生物	Amino acids and derivatives	氨基酸及其衍生物	C27H46N6O5	3	0.6379	-	29198.3	27831.7	21851.9	56548.7	46012.2	60802.6	1.38848	0.0108595	0.112223	0.482861	-1.05032	down	-	-
MW0164180	sn-3-O-(geranylgeranyl)glycerol 1-phosphate(2-)	sn-3-O-(香叶基香叶基)甘油1-磷酸(2-)	Organic acids	有机酸	Organic acids	有机酸	C23H39O6P-2	3	0.6351	-	25054.5	22712.7	22574.6	48368.9	55396.4	68356.4	1.42385	0.0266456	0.148825	0.408675	-1.29097	down	-	-
MW0157612	Thr-Gln-Leu	苏氨酸-谷氨酰胺-亮氨酸	Amino acids and derivatives	氨基酸及其衍生物	Amino acids and derivatives	氨基酸及其衍生物	C15H28N4O6	3	0.6343	-	15157.9	7437.1	5931.26	42518.9	24863.4	17068.2	1.19619	0.118389	0.277294	0.337788	-1.56581	down	-	-
MW0158658	Tyr-Val-Ala-Glu	酪氨酸-缬氨酸-丙氨酸-谷氨酸	Amino acids and derivatives	氨基酸及其衍生物	Amino acids and derivatives	氨基酸及其衍生物	C22H32N4O8	3	0.6342	-	16678.1	10920.7	7400.7	33825.7	32773.3	24084.7	1.30284	0.0110614	0.112635	0.385952	-1.37351	down	-	-
MW0135092	6-(5-carboxy-2-methoxyphenoxy)-3,4,5-trihydroxyoxane-2-carboxylic acid	6-(5-羧基-2-甲氧基苯氧基)-3,4,5-三羟基氧烷-2-羧酸	Organic acids	有机酸	Organic acids	有机酸	C14H16O10	3	0.6336	-	1.57684e+06	440882	676413	4021.73	22648.3	431030	1.07189	0.152311	0.316348	5.88625	2.55735	up	-	-
MW0136456	6-{4-[3-(3,7-dimethylocta-2,6-dien-1-yl)-5,7-dihydroxy-6-(4-hydroxy-3-methylbut-2-en-1-yl)-4-oxo-3,4-dihydro-2H-1-benzopyran-2-yl]-3-hydroxyphenoxy}-3,4,5-trihydroxyoxane-2-carboxylic acid	6-{2-[3-(3，7-二甲基辛-2，6-二烯-1-基)-5，7-二羟基-6-(4-羟基-3-甲基丁-2-烯-1-基)-4-氧代-3，4-二氢-2H-1-苯并吡喃-2-基]-5-羟基苯氧基}-3，4，5-三羟基恶烷-2-羧酸	Organic acids	有机酸	Organic acids	有机酸	C36H44O13	3	0.6325	-	190.53	1043.58	1220.39	2243.99	2015.72	2253.68	1.04107	0.0442549	0.180183	0.376839	-1.40798	down	-	-
MW0128476	[(5-{[2-(3,4-dihydroxyphenyl)-5,7-dihydroxy-4-oxo-4H-chromen-3-yl]oxy}-3,4-dihydroxyoxolan-2-yl)methoxy]sulfonic acid	[（5-{[2-(3，4-二羟基苯基)-5，7-二羟基-4-氧代-4H-苯并吡喃-3-基]氧}-3，4-二羟基氧杂环戊烷-2-基）甲氧基]磺酸	Organic acids	有机酸	Organic acids	有机酸	C20H18O14S	3	0.6318	-	1733.7	3003.73	1783.33	75.68	839.08	612.38	1.10348	0.0371216	0.166464	4.26992	2.09421	up	-	-
ZINC44361679	3',5-Di(1-oxo-4-pentenyloxy)-3,4',6,7-tetramethoxyflavone	3'，5-二（1-氧代-4-戊烯氧基)-3，4'，6，7-四甲氧基黄酮	Flavonoids	黄酮	Flavones	黄酮	C29H30O10	3	0.6311	-	2267.68	1129.88	1939.82	3257.77	8996.41	7574.45	1.25985	0.102332	0.258171	0.269175	-1.89338	down	-	-
MW0168269	Podocarpa-8,11,13-trien-16-oic acid, 12-hydroxy-	罗汉松酸	Terpenoids	萜类	Ditepenoids	二萜	C17H22O3	3	0.6309	-	26752	45332.1	7191.31	557964	422659	257058	1.35832	0.0452339	0.180429	0.0640516	-3.96462	down	-	-
ZINC95909321	5-hydroxy-2-(4-methoxyphenyl)-8,8-dimethyl-3-[(2S,3R,4R,5R,6S)-3,4,5-trihydroxy-6-methyloxan-2-yl]oxypyrano[2,3-h]chromen-4-one	5-羟基-2-(4-甲氧基苯基)-8，8-二甲基-3-[（2S，3R，4R，5R，6S)-3，4，5-三羟基-6-甲氧基-2-基]氧吡喃并[2，3-h]苯并吡喃-4-酮	Others	其它类	Ketone compounds	酮类化合物	C27H28O10	3	0.6295	-	4224.77	3900.25	33970.3	325.86	237.41	866.71	1.29249	0.306924	0.472818	29.4377	4.87959	up	-	-
MW0112382	3,4,5-trihydroxy-6-(2-oxoethoxy)oxane-2-carboxylic acid	3,4,5-三羟基-6-(2-氧代乙氧基）氧烷-2-羧酸	Organic acids	有机酸	Organic acids	有机酸	C8H12O8	3	0.629	-	5748.07	9540.22	8677.93	2235.97	1837.04	2464.43	1.4104	0.0340942	0.160395	3.66599	1.8742	up	-	-
MW0148512	Dihydromethanophenazine	二氢甲烷吩嗪；2-(二氢五苯基氧基)-二氢吩嗪	Alcohol and amines	醇、胺类	Polyamines	多胺	C37H52N2O	3	0.6286	-	268.23	2272.98	184.01	38907.1	23256.2	14303	1.34097	0.0746595	0.223786	0.0356395	-4.81038	down	-	-
MW0114813	Meglumine	葡甲胺	Alcohol and amines	醇、胺类	Amines	胺类	C7H17NO5	3	0.6245	-	6964.55	10954.9	9979.68	42012	26702.1	11270.3	1.08682	0.18759	0.354629	0.348808	-1.5195	down	-	-
ZINC95910636	1,3-dihydroxy-9-oxo-5-[(2S,3R,4S,5S,6R)-3,4,5-trihydroxy-6-(hydroxymethyl)oxan-2-yl]oxyxanthene-4-sulfonic acid	1，3-二羟基-9-氧代-5-[（2S，3R，4S，5S，6R)-3，4，5-三羟基-6-(羟甲基）恶烷-2-基]氧杂蒽-4-磺酸	Organic acids	有机酸	Organic acids	有机酸	C19H18O13S	3	0.6244	-	25503.4	17306.8	4123.32	39038.6	36496.6	43495.5	1.07544	0.0496207	0.18658	0.394298	-1.34264	down	-	-
MW0135269	6-[(3,3-dimethyloxiran-2-yl)methyl]-5-hydroxy-7-methoxy-2-(3,4,5-trimethoxyphenyl)-3,4-dihydro-2H-1-benzopyran-4-one	6-[（3，3-二甲基环氧乙烷-2-基）甲基]-5-羟基-7-甲氧基-2-(3，4，5-三甲氧基苯基)-3，4-二氢-2H-1-苯并吡喃-4-酮	Benzene and substituted derivatives	苯及其衍生物	Benzene and substituted derivatives	苯及其衍生物	C24H28O8	3	0.6238	-	42620.4	40457.5	44602.1	20675.4	19617.2	13517.9	1.39791	0.00211328	0.0811752	2.37277	1.24657	up	-	-
MW0148610	Ditrans,polycis-heptaprenyl diphosphate	二-反式，聚-顺-庚二烯基二磷酸酯；二磷酸四异戊二烯酯	Organic acids	有机酸	Organic acids	有机酸	C35H60O7P2	3	0.6208	-	1610.72	5607.06	3128	45211.7	39940.6	71769.7	1.40159	0.0367183	0.165603	0.0659295	-3.92293	down	C17436	-
Lmyp004407	Kaempferol-3-O-(2''-p-Coumaroyl)galactoside	山柰酚-3-O-(2''-对香豆酰)半乳糖苷	Flavonoids	黄酮	Flavonols	黄酮醇	C30H26O13	3	0.6175	-	32349.4	39234.1	34643.4	6811.8	15659.3	15027.8	1.29935	0.00398736	0.0916863	2.8328	1.50223	up	-	-
MW0157850	Thr-Tyr-Trp	苏氨酸-酪氨酸-色氨酸	Amino acids and derivatives	氨基酸及其衍生物	Amino acids and derivatives	氨基酸及其衍生物	C24H28N4O6	3	0.6175	-	6561.85	6873.7	8736.7	1402.73	850.26	3646.87	1.26165	0.00872109	0.10677	3.7581	1.91	up	-	-
MW0130150	Quercetin 3-O-alpha-L-rhamnoside	2-(3,4-二羟苯基)-5,7-二羟基-3-[（3,4,5-三羟基-6-甲基氧基-2-基）氧]-4H-铬-4-酮	Others	其它类	Ketone compounds	酮类化合物	C21H20O11	3	0.6167	-	281504	283925	242281	687000	832708	533572	1.39833	0.037863	0.167896	0.393376	-1.34602	down	-	-
ZINC103550758	Dehydroevodiamine	去氢吴茱萸碱	Alkaloids	生物碱	Plumerane	吲哚类生物碱	C19H15N3O	3	0.6164	-	22080.9	27404.8	22063.1	30517.5	262471	108454	1.09102	0.247905	0.413176	0.178229	-2.4882	down	-	-
MW0153803	Methyl acetoxy-6-gingerol	Methyl acetoxy-6-gingerol	Others	其它类	Lactones	内酯类化合物	C20H30O5	3	0.6162	-	17073.2	11120	6669.34	40206.1	50946.5	40903.7	1.36217	0.00229543	0.0812817	0.263998	-1.9214	down	-	-
MW0155095	Phe-Arg-Leu-Phe-Leu	Phe-Arg-Leu-Phe-Leu	Amino acids and derivatives	氨基酸及其衍生物	Amino acids and derivatives	氨基酸及其衍生物	C36H54N8O6	3	0.6155	-	132469	110293	114662	200860	232497	350886	1.33148	0.0863221	0.239252	0.455757	-1.13366	down	-	-
MW0128697	[3,5-dihydroxy-2-(5,6,7-trihydroxy-4-oxo-2-phenyl-4H-chromen-8-yl)oxan-4-yl]oxidanesulfonic acid	[3，5-二羟基-2-(5，6，7-三羟基-4-氧代-2-苯基-4H-苯并吡喃-8-基）恶烷-4-基]氧代磺酸	Organic acids	有机酸	Organic acids	有机酸	C20H18O12S	3	0.6124	-	2150.91	3633.58	2528.76	193.93	468.35	500.09	1.37942	0.0284301	0.152592	7.15198	2.83834	up	-	-
MW0145474	Arg-Phe-Val-Asp	Arg-Phe-Val-Asp	Amino acids and derivatives	氨基酸及其衍生物	Amino acids and derivatives	氨基酸及其衍生物	C24H37N7O7	3	0.6124	-	2971.64	5561.29	3283.47	2098.01	1126.88	1977.92	1.21039	0.100257	0.25532	2.27116	1.18343	up	-	-
MW0136489	6-{4-[5,7-dihydroxy-8-(3-methylbut-2-en-1-yl)-4-oxo-3,4-dihydro-2H-1-benzopyran-3-yl]-2-hydroxy-6-(3-methylbut-2-en-1-yl)phenoxy}-3,4,5-trihydroxyoxane-2-carboxylic acid	6-{4-[5，7-二羟基-8-(3-甲基丁-2-烯-1-基)-4-氧代-3，4-二氢-2H-1-苯并吡喃-3-基]-2-羟基-6-(3-甲基丁-2-烯-1-基）苯氧基}-3，4，5-三羟基恶烷-2-羧酸	Organic acids	有机酸	Organic acids	有机酸	C31H36O12	3	0.6118	-	14782.2	30355.2	25166.3	901.09	1423.08	1488.18	1.43584	0.0399185	0.171027	18.441	4.20485	up	-	-
MW0158551	Tyr-Met-Ala	酪氨酸-甲硫氨酸-丙氨酸	Amino acids and derivatives	氨基酸及其衍生物	Amino acids and derivatives	氨基酸及其衍生物	C17H25N3O5S1	3	0.6096	-	27032.8	16487.7	28313.7	74698.2	73670.7	26840	1.06287	0.154617	0.318854	0.409992	-1.28633	down	-	-
MW0149384	Gal1-3Gal1-4GlcSp	Gal1-3Gal1-4GlcSp	Others	其它类	Saccharides	糖类	C20H35N3O16	3	0.6078	-	6966.3	3310.58	7915.76	17193.5	10989.8	15711	1.21745	0.0245085	0.145194	0.414465	-1.27068	down	-	-
MW0157637	Thr-Glu-Phe	苏氨酸-谷氨酸-苯丙氨酸	Amino acids and derivatives	氨基酸及其衍生物	Amino acids and derivatives	氨基酸及其衍生物	C18H25N3O7	3	0.6066	-	6393.16	10787.5	12675.1	5965.82	2619.08	5737.39	1.10064	0.0896848	0.243071	2.08457	1.05975	up	-	-
MW0141093	1,2-Di-(9Z,12Z,15Z-octadecatrienoyl)-3-O-beta-D-galactosyl-sn-glycerol	1,2-Di-(9Z,12Z,15Z-octadecatrienoyl)-3-O-beta-D-galactosyl-sn-glycerol	GL	甘油脂类	TG	甘油三酯	C45H74O10	3	0.6031	-	86508.1	145171	128211	17963.3	11798.8	59894.5	1.23218	0.0181416	0.131732	4.0141	2.00508	up	-	-
MW0141152	1,3-alpha-D-Mannosyl-1,2-alpha-D-mannosyl-1,2-alpha-D-mannosyl-D-mannose	1,3-alpha-D-Mannosyl-1,2-alpha-D-mannosyl-1,2-alpha-D-mannosyl-D-mannose	Others	其它类	Saccharides	糖类	C24H42O21	3	0.6021	-	26585.6	28165.2	29958	1728.68	2325.43	8683.9	1.32121	0.00320926	0.0850936	6.65009	2.73337	up	C04861	-
MW0152522	Leu-Thr-Trp	L-亮氨酸-L-苏氨酸-L-色氨酸	Amino acids and derivatives	氨基酸及其衍生物	Amino acids and derivatives	氨基酸及其衍生物	C21H30N4O5	3	0.6007	-	230255	483951	391763	96868.4	102004	99496.6	1.38221	0.0681291	0.214028	3.70671	1.89014	up	-	-
MW0119136	3-(1-Piperazinyl)-1,2-benzisothiazole	苯并异噻唑哌嗪	Benzene and substituted derivatives	苯及其衍生物	Benzene and substituted derivatives	苯及其衍生物	C11H13N3S	3	0.6001	-	18382.8	17621.5	12189.5	51228.8	55324.9	29982	1.33064	0.0569298	0.199983	0.352975	-1.50236	down	-	-
ZINC85854118	Blestrianol B	6-(2，7-二羟基-4-甲氧基-9，10-二氢菲-1-基)-1-[（4-羟基苯基）甲基]-4-甲氧基-9，10-二氢菲-2，7-二醇	Benzene and substituted derivatives	苯及其衍生物	Benzene and substituted derivatives	苯及其衍生物	C37H32O7	3	0.6	-	12204.4	9915.89	8863.55	2271.08	3437.08	4743.7	1.33979	0.00647045	0.101413	2.96443	1.56775	up	-	-
MW0156875	Ser-Phe-Ile-Asp	Ser-Phe-Ile-Asp	Amino acids and derivatives	氨基酸及其衍生物	Amino acids and derivatives	氨基酸及其衍生物	C22H32N4O8	3	0.599	-	147249	193203	314018	78597.4	92358	107363	1.26611	0.124167	0.284512	2.35151	1.23359	up	-	-
MW0153526	Met-Cys-Leu	L-蛋氨酸-L-半胱氨酸-L-亮氨酸	Amino acids and derivatives	氨基酸及其衍生物	Amino acids and derivatives	氨基酸及其衍生物	C14H27N3O4S2	3	0.5974	-	20384.3	25351.8	17829.5	6904.3	5968.03	4772.04	1.42264	0.0147941	0.12128	3.6026	1.84904	up	-	-
MW0144528	Ala-Cys-Met	L-丙氨酰-L-半胱氨酰-L-蛋氨酸	Amino acids and derivatives	氨基酸及其衍生物	Amino acids and derivatives	氨基酸及其衍生物	C11H21N3O4S2	3	0.5971	-	138377	146115	169671	94267	31769	94929.6	1.09641	0.0482041	0.184392	2.05535	1.03939	up	-	-
MW0156017	Pro-Trp-Met	脯氨酰-色氨酸-蛋氨酸	Amino acids and derivatives	氨基酸及其衍生物	Amino acids and derivatives	氨基酸及其衍生物	C21H28N4O4S1	3	0.5963	-	37272.8	9921.59	21679.4	44447.2	49540.2	49628.2	1.09851	0.0818568	0.233445	0.47957	-1.06019	down	-	-
MW0158571	Tyr-Phe-Ile	酪氨酸-苯丙氨酸-异亮氨酸	Amino acids and derivatives	氨基酸及其衍生物	Amino acids and derivatives	氨基酸及其衍生物	C24H31N3O5	3	0.5961	-	15615.4	22444.3	16424.8	13474.5	7316.12	1754.29	1.01471	0.0674385	0.213594	2.41671	1.27305	up	-	-
ZINC95912028	(2S)-2alpha-[(E)-2,4,5-Trimethoxystyryl]-3abeta-(4-methoxyphenyl)-6-methoxy-8,9abeta-dihydroxy-2,3,3a,9a-tetrahydro-9H-furo[3,2-b][1]benzopyran-9-one	（2S，3aR，9aR)-8，9a-二羟基-6-甲氧基-3a-(4-甲氧基苯基)-2-[（E)-2-(2，4，5-三甲氧基苯基）乙烯基]-2，3-二氢呋喃并[3，2-b]色烯-9-酮	Others	其它类	Ketone compounds	酮类化合物	C30H30O10	3	0.5944	-	4998.43	4869.99	3952.61	16673.7	27150.6	10486.2	1.33818	0.108358	0.266885	0.254481	-1.97437	down	-	-
MW0104092	3,6,11,12-Tetrakis(acetyloxy)-5-(4-hydroxyphenyl)-8-oxatricyclo[7.4.0.0^{2,7}]trideca-1(13),2,4,6,9,11-hexaen-4-yl acetate	3,6,11,12-四(乙酰氧基)-5-(4-羟基苯基)-8-氧杂三环[7.4.0.0^{2,7}]trideca-1(13),2,4,6,9, 11-hexaen-4-yl acetate	Organic acids	有机酸	Organic acids	有机酸	C28H22O12	3	0.5936	-	34056.7	46605.9	79634.1	31019.1	24836.8	19486.6	1.15952	0.166542	0.330867	2.12757	1.08921	up	-	-
MW0009592	P-Toluenesulfonamide	4-甲苯磺酰胺	Benzene and substituted derivatives	苯及其衍生物	Benzene and substituted derivatives	苯及其衍生物	C7H9NO2S	3	0.5914	-	15510.6	12139.2	8868.34	37983.8	30606.7	25704.6	1.35439	0.0168128	0.127675	0.387275	-1.36857	down	C14412	-
MW0159125	Val-Phe-Met	缬氨酸-苯丙氨酸-甲硫氨酸	Amino acids and derivatives	氨基酸及其衍生物	Amino acids and derivatives	氨基酸及其衍生物	C19H29N3O4S1	3	0.5905	-	214757	389791	248728	102425	119183	121873	1.34265	0.0848704	0.237481	2.48419	1.31278	up	-	-
MW0145896	Asn-Thr-Asn	L-天冬酰胺-L-苏氨酰-L-天冬酰胺	Amino acids and derivatives	氨基酸及其衍生物	Amino acids and derivatives	氨基酸及其衍生物	C12H21N5O7	3	0.5885	-	794.75	723.98	765.89	422.52	214.62	106	1.24339	0.0265007	0.148639	3.07428	1.62025	up	-	-
MW0158519	Tyr-Leu-Gly-Lys-Arg	酪氨酸-亮氨酸-甘氨酸-赖氨酸-精氨酸	Amino acids and derivatives	氨基酸及其衍生物	Amino acids and derivatives	氨基酸及其衍生物	C29H49N9O7	3	0.5874	-	8990.85	18889.9	17678	31771.1	39180.7	47681.2	1.28405	0.015663	0.123289	0.384031	-1.3807	down	-	-
MW0151501	Ile-Leu-Val	L-异亮氨酸-L-亮氨酸-L-缬氨酸	Amino acids and derivatives	氨基酸及其衍生物	Amino acids and derivatives	氨基酸及其衍生物	C17H33N3O4	3	0.5871	-	69011.5	31498.2	56345.2	140665	131592	112552	1.29699	0.00654946	0.101413	0.407616	-1.29472	down	-	-
ZINC85830402	3'-Hydroxyhegoflavone A	2-[2-[（2S)-2-(3，4-二羟基苯基)-5，7-二羟基-4-氧代-2，3-二氢苯并吡喃-6-基]-4，5-二羟基苯基]-5，7-二羟基苯并吡喃-4-酮	Others	其它类	Ketone compounds	酮类化合物	C30H20O12	3	0.5867	-	4268.77	12479	9580.96	2159.61	1635.81	657.82	1.29499	0.0891338	0.242285	5.91225	2.56371	up	-	-
MW0156794	Ser-Ile-Gln-Glu	Ser-Ile-Gln-Glu	Amino acids and derivatives	氨基酸及其衍生物	Amino acids and derivatives	氨基酸及其衍生物	C19H33N5O9	3	0.5857	-	49890.4	60134.2	46347.7	161921	68259.6	83124.4	1.09646	0.21177	0.378073	0.499105	-1.00258	down	-	-
MW0156770	Ser-His-Asp	L-丝氨酰-L-组氨酰-L-天冬氨酸	Amino acids and derivatives	氨基酸及其衍生物	Amino acids and derivatives	氨基酸及其衍生物	C13H19N5O7	3	0.5854	-	23791.9	22661.7	23713.6	554.18	2927.32	20096.1	1.00059	0.127242	0.288302	2.97601	1.57338	up	-	-
MW0011749	[2-[4-Hydroxy-2,5-bis(hydroxymethyl)-3-(3-methylbutanoyloxy)oxolan-2-yl]oxy-6-(hydroxymethyl)-4,5-bis(2-methylpropanoyloxy)oxan-3-yl] decanoate	[2-[4-Hydroxy-2,5-bis(hydroxymethyl)-3-(3-methylbutanoyloxy)oxolan-2-yl]oxy-6-(hydroxymethyl)-4,5-bis(2-methylpropanoyloxy)oxan- 3-基]癸酸酯	Others	其它类	Lactones	内酯类化合物	C35H60O15	3	0.5848	-	12652.7	20912.3	6509.42	27261.3	36324.6	29186.5	1.18124	0.0310642	0.155594	0.431965	-1.21101	down	-	-
MW0011863	1,2-Diarachidoyl-sn-glycero-3-phosphocholine	1,2-Diarachidoyl-sn-glycero-3-phosphocholine	GP	甘油磷脂类	PC	磷脂酰胆碱	C48H96NO8P	3	0.5832	-	175272	191214	265314	82668.9	94635.8	136574	1.27856	0.0411735	0.173549	2.01288	1.00926	up	-	-
MW0052813	10-(9Z-hexadecenoyloxy)-hexadecanoic acid	10-(9Z-hexadecenoyloxy)-hexadecanoic acid	Lipids	脂质	Free fatty acids	游离脂肪酸	C32H60O4	3	0.5821	-	13841.3	8096.97	15808.3	43042.2	32911.1	13317.7	1.00281	0.181549	0.346556	0.42283	-1.24185	down	-	-
MW0153694	Met-Trp-Trp	甲硫氨酰-色氨酸-色氨酸	Amino acids and derivatives	氨基酸及其衍生物	Amino acids and derivatives	氨基酸及其衍生物	C27H31N5O4S1	3	0.5769	-	58961.6	59732.4	77998.9	15525.9	35631.3	16877.6	1.30847	0.00887247	0.106899	2.89106	1.5316	up	-	-
MW0140327	(2S,3S)-3-Hydroxyasparagine	（2S，3S)-3-羟基天冬酰胺	Others	其它类	Others	其它	C4H8N2O4	3	0.5766	-	3331.77	3022.5	5213.2	1434.56	1767.35	2539.7	1.21102	0.0870543	0.240305	2.01467	1.01055	up	C20631	-
MW0150316	Gly-Asn-Tyr	甘氨酸-天门冬酰氨-酪氨酸	Amino acids and derivatives	氨基酸及其衍生物	Amino acids and derivatives	氨基酸及其衍生物	C15H20N4O6	3	0.5749	-	75461	34966.7	39097	91017.3	145767	96066	1.22027	0.0528888	0.19325	0.449226	-1.15449	down	-	-
MW0158949	Val-Asp-Tyr-Val-Leu	Val-Asp-Tyr-Val-Leu	Amino acids and derivatives	氨基酸及其衍生物	Amino acids and derivatives	氨基酸及其衍生物	C29H45N5O9	3	0.5747	-	5076.9	1782.74	1926.64	10336.6	8880.05	7778.13	1.28046	0.0128077	0.115113	0.325481	-1.61936	down	-	-
MW0153645	Met-Pro-Glu	甲硫氨酰-脯氨酰-谷氨酸	Amino acids and derivatives	氨基酸及其衍生物	Amino acids and derivatives	氨基酸及其衍生物	C15H25N3O6S1	3	0.5737	-	137312	125633	151960	22677.3	27057	69784.3	1.29343	0.0103205	0.111886	3.47146	1.79554	up	-	-
MW0155179	Phe-Glu-His-Phe-Leu	Phe-Glu-His-Phe-Leu	Amino acids and derivatives	氨基酸及其衍生物	Amino acids and derivatives	氨基酸及其衍生物	C35H45N7O8	3	0.5732	-	50907.4	55535.9	61140.6	7325.17	6519.29	8399.87	1.45478	0.0028803	0.0850936	7.53378	2.91337	up	-	-
MW0148655	Docosanedioic acid	二十二烷二酸	Lipids	脂质	Free fatty acids	游离脂肪酸	C22H42O4	3	0.5705	-	36591.2	35242.2	44257.3	39952.8	109363	109820	1.05554	0.174636	0.33906	0.447991	-1.15846	down	C19625	ko00073
MW0153788	Methyl 10-gingerol	甲基- 10-姜酚	Others	其它类	Lactones	内酯类化合物	C22H36O4	3	0.5693	-	74961.2	34575.9	43256.3	124991	210758	203118	1.34304	0.0273461	0.150223	0.283545	-1.81835	down	-	-
MW0069049	TG(15:0/15:0/i-17:0)	TG(15:0/15:0/i-17:0)	GL	甘油脂类	TG	甘油三酯	C50H96O6	3	0.5687	-	32550.6	28709.5	67096.7	21194.3	14253.3	25500.8	1.09418	0.201347	0.366086	2.10599	1.0745	up	-	-
MW0157786	Thr-Pro-Pro-Val-Gln	Thr-Pro-Pro-Val-Gln	Amino acids and derivatives	氨基酸及其衍生物	Amino acids and derivatives	氨基酸及其衍生物	C24H40N6O8	3	0.5666	-	116410	220091	206139	36518.6	45653.4	41070	1.40453	0.049134	0.186065	4.40304	2.1385	up	-	-
MW0153074	Lys-Met-Glu	L-赖氨酸-L-蛋氨酸-L-谷氨酸	Amino acids and derivatives	氨基酸及其衍生物	Amino acids and derivatives	氨基酸及其衍生物	C16H30N4O6S1	3	0.5658	-	443302	555698	508229	140484	200381	172993	1.42315	0.00274686	0.0850936	2.93317	1.55246	up	-	-
MW0054848	methyl 3-ethenyl-4-(9H-pyrido[3,4-b]indol-1-ylmethyl)-2-[(2S,3R,4S,5S,6R)-3,4,5-trihydroxy-6-(hydroxymethyl)oxan-2-yl]oxy-3,4-dihydro-2H-pyran-5-carboxylate	甲基 3-ethenyl-4-(9H-pyrido[3,4-b]indol-1-ylmethyl)-2-[(2S,3R,4S,5S,6R)-3,4,5-trihydroxy-6- (羟甲基)oxan-2-yl]oxy-3,4-dihydro-2H-pyran-5-carboxylate	Others	其它类	Lactones	内酯类化合物	C27H30N2O9	3	0.5648	-	755.71	535.72	117.9	1149.9	2904.69	3469.5	1.196	0.0913288	0.244683	0.187309	-2.41651	down	-	-
MEDP1423	Carnitine C7:DC	肉碱 C7:DC	FA	脂肪酰类	CAR	酰基肉碱	C14H25NO6	3	0.5647	-	47928.4	40081.5	40355.7	17717.8	21733.3	18386.2	1.42333	0.00432782	0.0945682	2.21943	1.15019	up	-	-
MW0011128	(3alpha,5alpha,22R,23R)-Cholestane-3,22,23-triol	(3alpha,5alpha,22R,23R)-Cholestane-3,22,23-triol	Alcohol and amines	醇、胺类	Alcohols	醇类	C27H48O3	3	0.5635	-	23499.1	30088.2	42223.5	55911.7	51782.4	84216.1	1.21799	0.0679637	0.213965	0.499248	-1.00217	down	-	-
MW0146192	Asp-Lys-Phe	L-天冬氨酰-L-赖氨酰-L-苯丙氨酸	Amino acids and derivatives	氨基酸及其衍生物	Amino acids and derivatives	氨基酸及其衍生物	C19H28N4O6	3	0.5615	-	327126	419922	426778	158238	195976	204589	1.39319	0.0126572	0.115113	2.10061	1.07081	up	-	-
MW0130120	2-(3,4-dihydroxyphenyl)-3,4-dihydro-2H-1-benzopyran-3,6,7-triol	2-(3,4-二羟苯基)-3,4-二氢-2H-1-苯并吡喃-3,6,7-三醇	Benzene and substituted derivatives	苯及其衍生物	Benzene and substituted derivatives	苯及其衍生物	C15H14O6	3	0.5605	-	19646.3	35362.5	17592	527.48	7664.55	7936.34	1.05731	0.0615737	0.206881	4.50144	2.17039	up	-	-
ZINC44404823	(1R,2S,4S,5R,10R,11S)-5-hydroxy-16-[(1S)-1-[(1S,2R,4R,6S)-2-hydroxy-1,6-dimethyl-3,7-dioxabicyclo[4.1.0]heptan-4-yl]ethyl]-10-methyl-3-oxapentacyclo[9.8.0.02,4.05,10.014,19]nonadeca-7,14(19),15,17-tetraen-9-one	假酸浆稀酮	Benzene and substituted derivatives	苯及其衍生物	Benzene and substituted derivatives	苯及其衍生物	C28H34O6	3	0.5599	-	13429.6	13854.1	20132.3	6668.4	4371.32	5560.06	1.38861	0.0326864	0.157371	2.85643	1.51421	up	-	-
MW0013070	2,2,4,4-Tetramethyl-6-(1-oxobutyl)-1,3,5-cyclohexanetrione	2,2,4,4-四甲基-6-(1-氧丁基)-1,3,5-环己三酮	Others	其它类	Ketone compounds	酮类化合物	C14H20O4	3	0.5594	-	2855.73	7342.05	8046.47	1038.15	1684.61	683.53	1.30775	0.088764	0.242131	5.35605	2.42117	up	-	-
ZINC14610514	mulberrofuran Z	桑黄呋喃Z	Heterocyclic compounds	杂环化合物	Heterocyclic compounds	杂环化合物	C30H36O5	3	0.5544	-	316796	449218	494907	102343	87291.4	48343.1	1.39945	0.0170173	0.127974	5.29848	2.40558	up	-	-
MW0150403	Gly-Leu-Gln	甘氨酸-亮氨酸-谷酰胺	Amino acids and derivatives	氨基酸及其衍生物	Amino acids and derivatives	氨基酸及其衍生物	C13H24N4O5	3	0.5483	-	376266	24726.6	319654	1.28609e+06	1.00506e+06	756958	1.06917	0.0177665	0.130796	0.236424	-2.08055	down	-	-
ZINC14697276	3,4,5,6-Tetrahydro-2beta-(4-hydroxy-3-methoxyphenyl)-11-methoxy-2H-phenanthro[2,1-b]pyran-3alpha,8-diol	（2S，3R)-2-(4-羟基-3-甲氧基苯基)-11-甲氧基-3，4，5，6-四氢-2H-萘并[2，1-f]色烯-3，8-二醇	Alcohol and amines	醇、胺类	Alcohols	醇类	C25H24O6	3	0.5437	-	169739	325619	187623	57574.7	87622.5	112325	1.25815	0.0908558	0.244389	2.65213	1.40715	up	-	-
MW0134069	5,7-dihydroxy-2-(4-hydroxy-3-methoxyphenyl)-3,6-dimethoxy-3,4-dihydro-2H-1-benzopyran-4-one	5，7-二羟基-2-(4-羟基-3-甲氧基苯基)-3，6-二甲氧基-3，4-二氢-2H-1-苯并吡喃-4-酮	Benzene and substituted derivatives	苯及其衍生物	Benzene and substituted derivatives	苯及其衍生物	C18H18O8	3	0.5382	-	21349	8554.37	18142.3	32940.3	29940.6	42419.3	1.19261	0.0238363	0.143893	0.456274	-1.13203	down	-	-
MW0116533	1,10-Dihydroxy-8-(hydroxymethyl)naphtho[1,2-c]isochromen-6-one	1,10-Dihydroxy-8-(hydroxymethyl)naphtho[1,2-c]isochromen-6-one	Others	其它类	Ketone compounds	酮类化合物	C18H12O5	3	0.5358	-	12550.7	5504.93	21411.1	4150.78	3969.49	4359.36	1.15402	0.189715	0.355821	3.16249	1.66106	up	-	-
MW0157030	Ser-Trp-OH	丝氨酸-色氨酸-OH	Amino acids and derivatives	氨基酸及其衍生物	Amino acids and derivatives	氨基酸及其衍生物	C14H17N3O4	3	0.5353	-	212920	336871	241949	146900	106613	141687	1.31064	0.0593492	0.203533	2.00339	1.00244	up	-	-
MW0165918	(-)-Dehydrodiconiferyl acid carboxylate	(-)-脱氢二松果酸羧酸酯	Organic acids	有机酸	Organic acids	有机酸	C20H16O8-2	3	0.5343	-	19735.9	20678.9	25705	5095.15	4425.4	4624.6	1.4524	0.0105698	0.112223	4.67438	2.22477	up	-	-
MW0011891	1,2-Dimyristoyl-sn-glycerol	1，2-二肉豆蔻酰-sn-甘油	GL	甘油脂类	DG	甘油二酯	C31H60O5	3	0.5271	-	32.69	1980.81	162.79	36874.1	16826.5	3606.04	1.20384	0.197323	0.362462	0.0379762	-4.71876	down	C16667	-
MW0156663	Ser-Asn-Leu	L-丝氨酰-L-天冬酰胺酰-L-亮氨酸	Amino acids and derivatives	氨基酸及其衍生物	Amino acids and derivatives	氨基酸及其衍生物	C13H24N4O6	3	0.527	-	86866.6	78713.9	53832.3	708808	362327	132927	1.20766	0.188533	0.355577	0.182227	-2.45619	down	-	-
ZINC95912566	[(8S,9S,10S,11R)-11-acetyloxy-9-hydroxy-3,4,5,19-tetramethoxy-9,10-dimethyl-15,17-dioxatetracyclo[10.7.0.02,7.014,18]nonadeca-1(19),2,4,6,12,14(18)-hexaen-8-yl] (Z)-2-methylbut-2-enoate	[（8S，9S，10S，11R)-11-乙酰氧基-9-羟基-3，4，5，19-四甲氧基-9，10-二甲基-15，17-二氧杂四环[10.7.0.02，7.014，18]十九-1（19)-2，4，6，12，14（18)-己烯-8-基]（Z)-2-甲基丁-2-烯酸酯	Others	其它类	Lactones	内酯类化合物	C30H36O11	3	0.5269	-	4462.84	5827.58	6885.06	23988.7	15268.4	18833.4	1.39201	0.0258308	0.148071	0.295668	-1.75795	down	-	-
MW0161268	Geranate	天竺葵	Others	其它类	Lactones	内酯类化合物	C10H15O2-	3	0.5246	-	1160.34	3225.39	789.73	6542.56	6055.04	3126.05	1.15591	0.0611874	0.20603	0.329151	-1.60318	down	-	-
MW0159241	Val-Val-Ile	缬氨酸-缬氨酸-异亮氨酸	Amino acids and derivatives	氨基酸及其衍生物	Amino acids and derivatives	氨基酸及其衍生物	C16H31N3O4	3	0.5232	-	3862.13	5264.35	5341.9	5317.56	50013.1	22812.6	1.04261	0.244105	0.40875	0.185152	-2.43322	down	-	-
MW0128117	(3-{6,8-bis[3,7-dihydroxy-2-(3-hydroxyphenyl)-3,4-dihydro-2H-1-benzopyran-4-yl]-3,5,7-trihydroxy-3,4-dihydro-2H-1-benzopyran-2-yl}phenyl)oxidanesulfonic acid	（3-{6，8-双[3，7-二羟基-2-(3-羟基苯基)-3，4-二氢-2H-1-苯并吡喃-4-基]-3，5，7-三羟基-3，4-二氢-2H-1-苯并吡喃-2-基}苯基）氧烷磺酸	Organic acids	有机酸	Organic acids	有机酸	C45H38O16S	3	0.5201	-	2.18249e+06	1.58314e+06	2.00674e+06	558812	585560	1.25659e+06	1.24921	0.0198431	0.136802	2.40419	1.26555	up	-	-
MW0158136	Trp-Gln-Phe	色氨酸-谷氨酰胺-苯丙氨酸	Amino acids and derivatives	氨基酸及其衍生物	Amino acids and derivatives	氨基酸及其衍生物	C25H29N5O5	3	0.5197	-	648.76	1346.84	894.21	7701.19	10886.3	1091.97	1.0564	0.191315	0.357139	0.146844	-2.76765	down	-	-
MEDN1338	2-Hydroxy HippuricAcid	2-羟基马尿酸	Organic acids	有机酸	Organic acids	有机酸	C5H4O3	3	0.5191	-	17368.2	38246.4	32520	90745.3	64351.5	45276	1.15455	0.0871287	0.240305	0.439853	-1.18491	down	-	-
MW0056871	PC(15:0/22:5(4Z,7Z,10Z,13Z,16Z))	PC(15:0/22:5(4Z,7Z,10Z,13Z,16Z))	GP	甘油磷脂类	PC	磷脂酰胆碱	C45H80NO8P	3	0.5189	-	344817	463699	475573	1.00458e+06	980039	643437	1.29522	0.048488	0.184716	0.488608	-1.03325	down	-	-
MW0144727	Ala-Ser-Gln	L-丙氨酰-L-丝氨酰-L-谷氨酰胺	Amino acids and derivatives	氨基酸及其衍生物	Amino acids and derivatives	氨基酸及其衍生物	C11H20N4O6	3	0.5154	-	32495.5	14066.8	10406.5	43970.7	49431.9	32179.9	1.1442	0.0598208	0.204095	0.453637	-1.14039	down	-	-
MW0106289	Cysteylglycyllysine	Cys Gly Lys	Amino acids and derivatives	氨基酸及其衍生物	Amino acids and derivatives	氨基酸及其衍生物	C11H22N4O4S	3	0.5118	-	13811.4	21255	18240.9	4997.86	8524.07	2592.73	1.27404	0.012228	0.114817	3.308	1.72596	up	-	-
MW0148081	Cys-Tyr-Asn	半胱氨酸-酪氨酸-天门冬酰胺	Amino acids and derivatives	氨基酸及其衍生物	Amino acids and derivatives	氨基酸及其衍生物	C16H22N4O6S1	3	0.5097	-	49756.6	27059.3	38885.2	83277.2	155252	89074.9	1.30229	0.0826326	0.234075	0.353174	-1.50155	down	-	-
ZINC33830068	(1R,3S)-2,2-dimethylcyclopentane-1,3-dicarboxylic acid	(1R,3S)-2,2-dimethylcyclopentane-1,3-dicarboxylic acid	Organic acids	有机酸	Organic acids	有机酸	C9H14O4	3	0.5085	-	21552.3	20016.5	23823.5	1437.17	1543.35	1465.39	1.45887	0.00293026	0.0850936	14.7084	3.87857	up	-	-
MW0105783	Asn-Leu-Arg	L-天冬酰胺-L-亮氨酰-L-精氨酸	Amino acids and derivatives	氨基酸及其衍生物	Amino acids and derivatives	氨基酸及其衍生物	C16H31N7O5	3	0.5084	-	22398.3	11644.3	7512.95	41210.9	58240.2	37535.1	1.29457	0.0187766	0.133581	0.303355	-1.72092	down	-	-
MW0130510	2-[(2-Hydroxyphenyl)methyl]propanedioic acid	2-[（2-羟基苯基）甲基]丙二酸	Organic acids	有机酸	Organic acids	有机酸	C10H10O5	3	0.5038	-	18705.8	14003.6	14161	46530.2	34151.3	31665.3	1.37882	0.0312518	0.155594	0.417194	-1.26121	down	-	-
MW0145567	Arg-Val-Lys	L-精氨酰-L-缬氨酰-L-赖氨酸	Amino acids and derivatives	氨基酸及其衍生物	Amino acids and derivatives	氨基酸及其衍生物	C17H35N7O4	3	0.503	-	46239.3	118501	50691.9	31828.4	31385.7	19748.5	1.16136	0.196725	0.362181	2.59674	1.3767	up	-	-
MW0112350	3,4,5-trihydroxy-6-({2-[2,4,6-trihydroxy-3-(3-methylbut-2-en-1-yl)phenyl]acetyl}oxy)oxane-2-carboxylic acid	3，4，5-三羟基-6-({2-[2，4，6-三羟基-3-(3-甲基-2-丁烯-1-基）苯基]乙酰基}氧基）氧烷-2-羧酸	Organic acids	有机酸	Organic acids	有机酸	C19H24O11	3	0.5021	-	2137.41	3226.15	1860.32	9143.73	10452	4528.94	1.29121	0.0815047	0.233158	0.29944	-1.73966	down	-	-
MW0138338	3-[(2R,3R,4R,5S)-3,4-dihydroxy-5-(hydroxymethyl)oxolan-2-yl]oxy-2-(3,4-dihydroxyphenyl)-5,7-dihydroxychromen-4-one	槲皮素-3-O-阿拉伯糖苷(番石榴苷)	Flavonoids	黄酮	Flavonols	黄酮醇	C20H18O11	2	0.949	22255-13-6	274113	516744	398223	801069	1.75192e+06	2.87936e+06	1.26453	0.14093	0.303743	0.218889	-2.19173	down	-	-
MW0139148	Nepitrin	泽兰黄酮-7-O-葡萄糖苷(假荆芥属苷)	Flavonoids	黄酮	Flavones	黄酮	C22H22O12	2	0.935	569-90-4	71366.2	87364	96859.1	9162.68	19459.3	75085.1	1.03603	0.119349	0.277723	2.46453	1.30131	up	-	-
MW0107553	Isobutyrylglycine	异丁酰甘氨酸	Amino acids and derivatives	氨基酸及其衍生物	Amino acids and derivatives	氨基酸及其衍生物	C6H11NO3	2	0.9265	15926-18-8	53035.6	18950	18437.3	183488	128091	166645	1.35764	0.00430559	0.0945682	0.18908	-2.40293	down	-	-
MEDL00392	1-(9Z-octadecenoyl)-sn-glycero-3-phosphocholine	1-(9Z-十八烯酰基)-sn-glycero-3-phosphocholine	Lipids	脂质	LPC	溶血磷脂酰胆碱	C26H52NO7P	2	0.9254	19420-56-5	13599	18840.1	20110.9	4740.93	6041.68	11756.9	1.2202	0.0273297	0.150223	2.33146	1.22123	up	-	-
MW0114532	3-Indolylmethyl glucosinolate	3-吲哚基甲基硫苷	Others	其它类	Glucosinolates	硫苷类	C16H20N2O9S2	2	0.9227	4356-52-9	214914	1.97081e+06	252519	66844.2	33731.7	38604.5	1.23875	0.316746	0.482155	17.5186	4.13081	up	-	-
MW0000482	Leurocristine	Leurocristine	Alkaloids	生物碱	Alkaloids	生物碱	C46H56N4O10	2	0.9167	57-22-7 | 132142-73-5	49130.1	46530.5	59251	13494.3	10670.9	21946	1.37406	0.00229398	0.0812817	3.35953	1.74826	up	-	-
MW0107510	Ile-Ser	L-异亮氨酸-L-丝氨酸	Amino acids and derivatives	氨基酸及其衍生物	Amino acids and derivatives	氨基酸及其衍生物	C9H18N2O4	2	0.9064	6403-14-1	90032.3	34798.4	51673.7	17892.7	30911.5	24311.5	1.1487	0.163889	0.32877	2.41404	1.27145	up	-	-
MW0107376	Homovanillic acid sulfate	硫酸高香草酸	Organic acids	有机酸	Organic acids	有机酸	C9H10O7S	2	0.9044	38339-06-9	126993	129315	161078	38037.3	47399.3	65091.8	1.38344	0.00386556	0.0915113	2.77281	1.47135	up	-	-
MEDP1568	Xanthosine-5'-monophosphate	黄嘌呤-5'-单磷酸	Nucleotides and derivatives	核苷酸及其衍生物	Nucleotides and derivatives	核苷酸及其衍生物	C10H13N4O9P	2	0.899	523-98-8	256972	308825	303365	7217.17	6772.69	18249	1.43252	0.00233944	0.0812817	26.96	4.75275	up	C00655	ko00230,ko01100,ko01110,ko01232
MW0052644	escin Ib	七叶皂苷	Steroids	甾体	Steroid	甾体	C55H86O24	2	0.897	26339-90-2 | 6805-41-0	19962.5	16412.4	11908.2	2844.78	5587.98	11304.6	1.10976	0.0496186	0.18658	2.44628	1.29059	up	C08921	-
MW0138805	Lobaric acid	洛巴酸	Organic acids	有机酸	Organic acids	有机酸	C25H28O8	2	0.8955	522-53-2	2144.95	7694.28	2051.96	92624	72677	14393.1	1.27614	0.139153	0.30211	0.0661747	-3.91758	down	-	-
MW0011760	[6]-Gingerdiol 3,5-diacetate	[6]-姜二醇3，5-二乙酸酯	Others	其它类	Lactones	内酯类化合物	C21H32O6	2	0.864	195204-05-8	283.89	607.67	835.13	31414.2	55044.6	143661	1.42247	0.155682	0.320055	0.00750344	-7.05823	down	-	-
MW0109969	Thr-Ser	苏氨酸-丝氨酸	Amino acids and derivatives	氨基酸及其衍生物	Amino acids and derivatives	氨基酸及其衍生物	C7H14N2O5	2	0.8566	61043-86-5	7799.66	8239.57	11181.5	53235.4	33325.7	35525.5	1.41118	0.0344025	0.161085	0.222962	-2.16513	down	-	-
MW0135803	Luteolin-7-o-glucuronide	木犀草素-7-O-葡萄糖醛酸苷	Flavonoids	黄酮	Flavones	黄酮	C21H18O12	2	0.8445	29741-10-4	780368	273858	174418	756630	1.1517e+06	1.10388e+06	1.12535	0.0665695	0.213008	0.407888	-1.29376	down	-	-
MW0149467	Ganoderic acid A	7,15-二羟基-3,11,23-三氧代羊毛甾-8-烯-26-酸 (灵芝酸 A)	Terpenoids	萜类	Triterpene	三萜	C30H44O7	2	0.8441	81907-62-2	360004	623671	369735	102476	102948	126705	1.40483	0.0575261	0.200843	4.07495	2.02678	up	-	-
MW0109750	S-Phenyl-N-acetylcysteine	S-苯基-N-乙酰半胱氨酸	Organic acids	有机酸	Organic acids	有机酸	C11H13NO3S	2	0.8252	4775-80-8	1.40363e+06	929099	945168	392062	643780	291669	1.26433	0.0316954	0.156454	2.46921	1.30405	up	-	-
MW0157897	Thr-Met	苏氨酸-甲硫氨酸	Amino acids and derivatives	氨基酸及其衍生物	Amino acids and derivatives	氨基酸及其衍生物	C9H18N2O4S	2	0.8192	90729-28-5	229906	307579	682906	138283	162523	203091	1.10959	0.228279	0.393468	2.42191	1.27614	up	-	-
MW0108474	N-(N-Formyl-L-methionyl)-L-phenylalanine	N-(N-甲酰基-L-甲硫氨酰基)-L-苯丙氨酸	Amino acids and derivatives	氨基酸及其衍生物	Amino acids and derivatives	氨基酸及其衍生物	C15H20N2O4S	2	0.8155	22008-60-2	288639	394543	414114	354968	1.2645e+06	1.08434e+06	1.0026	0.19191	0.357522	0.405833	-1.30104	down	-	-
MEDL02212	(-)-Epicatechin gallate	表儿茶素没食子酸酯	Flavonoids	黄酮	Flavanols	黄烷醇类	C22H18O10	2	0.8143	1257-08-5	55275.8	59613.3	52455.8	77716.4	104793	213507	1.15661	0.20735	0.37297	0.422571	-1.24273	down	-	-
MW0055473	(-)-Oleoside 11-methyl ester	木樨榄苷-11-甲酯	Terpenoids	萜类	Monoterpenoids	倍萜	C17H24O11	2	0.8047	60539-23-3	2.98695e+06	2.23089e+06	2.3455e+06	6.28353e+06	5.61934e+06	4.33928e+06	1.36794	0.0238539	0.143893	0.465661	-1.10265	down	-	-
MW0110241	Tyr-Asp	酪氨酸-天冬氨酸	Amino acids and derivatives	氨基酸及其衍生物	Amino acids and derivatives	氨基酸及其衍生物	C13H16N2O6	2	0.8029	87085-11-8	13421.5	7297.17	5873.19	14661.2	193445	69321.2	1.14438	0.254574	0.420875	0.0958516	-3.38305	down	-	-
MEDN0431	N2,N2-Dimethylguanosine	2-(二甲基氨基)鸟苷	Nucleotides and derivatives	核苷酸及其衍生物	Nucleotides and derivatives	核苷酸及其衍生物	C12H17N5O5	2	0.7983	2140-67-2	88135.2	116476	115937	32683.1	56238.6	49269.8	1.3367	0.00801545	0.103511	2.3196	1.21387	up	C74036	-
MW0012312	9s,13r-12-Oxophytodienoic Acid	9s,13r-12-氧代植物二烯酸	Lipids	脂质	Free fatty acids	游离脂肪酸	C18H28O3	2	0.7983	71606-07-0 | 67204-66-4	7377.01	13065.5	8861.25	93309.9	67452.3	26720.5	1.31707	0.111625	0.270748	0.156301	-2.6776	down	-	-
MW0114515	Gentianose	龙胆糖	Others	其它类	Saccharides	糖类	C18H32O16	2	0.7956	25954-44-3	457875	678354	727291	84790.3	85631.6	100328	1.44356	0.023158	0.143893	6.88282	2.783	up	C08239	-
MW0062101	Plumieride	鸡蛋花苷	Terpenoids	萜类	Monoterpenoids	倍萜	C21H26O12	2	0.7956	511-89-7	967892	653978	778322	33112.5	48683	528362	1.11848	0.0461174	0.181137	3.93373	1.9759	up	C09797	-
MW0123668	Dihydrocarvone	二氢香芹酮	Others	其它类	Ketone compounds	酮类化合物	C10H16O	2	0.7904	7764-50-3	16503	18137.8	12081.6	64693.4	57317.9	23189.1	1.21857	0.121347	0.279986	0.321778	-1.63586	down	C18018	-
MW0105514	Ala-Gly	甘氨酸	Amino acids and derivatives	氨基酸及其衍生物	Amino acids and derivatives	氨基酸及其衍生物	C5H10N2O3	2	0.7901	687-69-4 | 25765-55-3	79042.3	124222	101823	40681.8	43352.4	34609.6	1.39603	0.0369874	0.16634	2.57146	1.36259	up	-	-
MW0132689	Dihydrokaempferol	3，5，7-三羟基-2-(4-羟基苯基)-3，4-二氢-2H-1-苯并吡喃-4-酮	Benzene and substituted derivatives	苯及其衍生物	Benzene and substituted derivatives	苯及其衍生物	C15H12O6	2	0.7832	104486-98-8 | 5150-32-3 | 724434-08-6	169266	370639	428018	45260	52655.2	248752	1.04816	0.116401	0.275501	2.79208	1.48134	up	-	-
MW0128381	(S)-Acenocoumarol	（S)-(-)-乙酰香豆酚	Heterocyclic compounds	杂环化合物	Heterocyclic compounds	杂环化合物	C19H15NO6	2	0.7817	66556-78-3	3951.3	2811.65	754.57	22509.6	2541.94	22411.5	1.01064	0.180563	0.345818	0.158387	-2.65848	down	-	-
MW0124466	Isoeugenitol	异丁香酚	Heterocyclic compounds	杂环化合物	Heterocyclic compounds	杂环化合物	C11H10O4	2	0.7787	479-06-1	18105.2	63671.4	25825.1	97166.3	138134	79731.2	1.20302	0.0383016	0.168303	0.341558	-1.5498	down	-	-
MW0103360	3',5'-Cyclic IMP	3'，5'-环肌苷单磷酸	Nucleotides and derivatives	核苷酸及其衍生物	Nucleotides and derivatives	核苷酸及其衍生物	C10H11N4O7P	2	0.7784	3545-76-4	197180	242073	129490	33276.8	6875.65	33485.1	1.30493	0.0300797	0.153711	7.72356	2.94927	up	C00943	-
MW0061068	Perillic acid	紫苏酸	Terpenoids	萜类	Terpene	萜类	C10H14O2	2	0.7777	7694-45-3	38214.4	74752.9	42518.9	271133	267379	145817	1.35591	0.041977	0.175313	0.22721	-2.1379	down	C11924	-
MW0118899	3-(2-Thienyl)acrylic acid	2-噻吩丙烯酸	Organic acids	有机酸	Organic acids	有机酸	C7H6O2S	2	0.7763	1124-65-8 | 15690-25-2	85842.6	43959.2	58849.6	211703	153362	122033	1.29346	0.0453298	0.180429	0.387297	-1.36849	down	-	-
MW0108765	Neotame	纽甜	Benzene and substituted derivatives	苯及其衍生物	Benzene and substituted derivatives	苯及其衍生物	C20H30N2O5	2	0.7714	165450-17-9	4159.82	4736.95	4134.85	43041.3	47127.5	26022.5	1.43627	0.0334496	0.15886	0.112157	-3.15641	down	-	-
MW0159730	Geranyl diphosphate	牻牛儿基二磷酸盐	Organic acids	有机酸	Organic acids	有机酸	C10H20O7P2	2	0.7682	763-10-0	198585	92782.6	87484.1	193842	282765	382079	1.17145	0.0799752	0.231268	0.441199	-1.1805	down	C05847	ko00130,ko01100,ko01110,ko01240
MW0052373	Dihydrojasmonic acid	二氢茉莉酮酸	Organic acids	有机酸	Organic acids	有机酸	C12H20O3	2	0.7674	98674-52-3	15448.4	28288.2	25096.7	8744.4	6979.83	3487.92	1.31082	0.0362158	0.164857	3.5828	1.84109	up	-	-
MW0109976	Threonyl-valine	苏氨酰缬氨酸	Amino acids and derivatives	氨基酸及其衍生物	Amino acids and derivatives	氨基酸及其衍生物	C9H18N2O4	2	0.7671	99032-17-4	119511	154042	137993	56952.4	64886.1	47531.4	1.41497	0.00577039	0.10028	2.42986	1.28087	up	-	-
MW0103561	Flavin mononucleotide	黄素单核苷酸(FMN)	Nucleotides and derivatives	核苷酸及其衍生物	Nucleotides and derivatives	核苷酸及其衍生物	C17H21N4O9P	2	0.7569	146-17-8	14902.2	7988.78	9465.51	27667.2	23689.3	23683.3	1.33941	0.00761305	0.10294	0.431191	-1.2136	down	C00061	ko00190,ko00740,ko01100,ko01110,ko01240
MW0107237	s-Hexylglutathione	S-己基-L-谷胱甘肽	Amino acids and derivatives	氨基酸及其衍生物	Amino acids and derivatives	氨基酸及其衍生物	C16H29N3O6S	2	0.7543	24425-56-7	17467.9	22225.2	16517.2	4931.24	9752.18	6597.77	1.33449	0.00766017	0.10294	2.64132	1.40126	up	C02886	-
MW0113885	Aloesin	芦荟苦素	Others	其它类	Chromone	色酮类	C19H22O9	2	0.7445	30861-27-9	138896	116699	129609	54242.3	43021.4	56854.6	1.426	0.00112959	0.0714974	2.49941	1.32159	up	C08994 | C15539	-
MW0106675	Ethyl N-acetyl-L-tyrosinate	N-乙酰-L-酪氨酸乙酯	Amino acids and derivatives	氨基酸及其衍生物	Amino acids and derivatives	氨基酸及其衍生物	C13H17NO4	2	0.7426	840-97-1	3052.56	5474.5	6371.51	942.02	621.11	806.68	1.4109	0.0508381	0.189165	6.28682	2.65233	up	C01657	-
MEDN0624	Adenosine-5'-phosphosulfate	腺苷-5'-磷酸硫酸酐	Nucleotides and derivatives	核苷酸及其衍生物	Nucleotides and derivatives	核苷酸及其衍生物	C10H14N5O10PS	2	0.74	485-84-7	156111	168714	168123	27840	19675.4	74453.3	1.29714	0.0144907	0.120825	4.04159	2.01492	up	C00224	ko00230,ko00261,ko00920,ko01100,ko01110
MADN0561	N,N',N''-triacetylchitotriose	N,N',N''-三乙酰基壳三糖	Others	其它类	Saccharides	糖类	C24H41N3O16	2	0.7352	38864-21-0	73053.5	70897.9	86950.4	38859.1	28526.3	35431	1.41226	0.00392566	0.0915745	2.24577	1.16721	up	-	-
MW0110229	H-Tyr-tyr-tyr-OH	H-Tyr-tyr-tyr-OH	Amino acids and derivatives	氨基酸及其衍生物	Amino acids and derivatives	氨基酸及其衍生物	C27H29N3O7	2	0.7313	7390-78-5	7039.57	15811.9	12729.1	37954.9	30532.8	34819.9	1.32526	0.00281977	0.0850936	0.344414	-1.53779	down	-	-
MW0106379	D-erythro-Imidazoleglycerol Phosphate Monohydrate	D-赤型-咪唑磷酸甘油一水合物	Organic acids	有机酸	Organic acids	有机酸	C6H11N2O6P	2	0.7306	210241-69-3	3406.62	4610.88	6543.46	11023.1	15230.2	19031	1.33764	0.0337685	0.15972	0.321545	-1.63691	down	-	-
MW0112757	3-Benzoyl-6-phenyl-pyran-2,4-dione	3-苯甲酰基-6-苯基-2H-吡喃-2,4（3H)-二酮	Benzene and substituted derivatives	苯及其衍生物	Benzene and substituted derivatives	苯及其衍生物	C18H12O4	2	0.7279	602-98-2	134476	79013.3	90306	252306	206749	190955	1.32832	0.0100623	0.111886	0.46737	-1.09736	down	-	-
MEDP1667	Phe-Glu	L-苯丙氨酰-L-谷氨酸	Amino acids and derivatives	氨基酸及其衍生物	Amino acids and derivatives	氨基酸及其衍生物	C14H18N2O5	2	0.727	3617-45-6	62310.2	101314	116807	24963.7	42033.3	39998.7	1.2937	0.0584602	0.202273	2.62096	1.3901	up	-	-
MW0103583	Guanosine diphosphate mannose	鸟苷二磷酸甘露糖	Nucleotides and derivatives	核苷酸及其衍生物	Nucleotides and derivatives	核苷酸及其衍生物	C16H25N5O16P2	2	0.7266	3123-67-9	8367.73	3877.13	1903.39	17777.3	33963.3	38522.5	1.31968	0.0464323	0.181137	0.156744	-2.67351	down	C00096	ko00051,ko00053,ko00510,ko00520,ko01100,ko01110,ko01240,ko01250
MW0131236	Hesperetin dihydrochalcone	3-(3-羟基-4-甲氧基苯基)-1-(2，4，6-三羟基苯基）丙-1-酮	Others	其它类	Ketone compounds	酮类化合物	C16H16O6	2	0.7222	35400-60-3	34916.7	36012.5	57921.4	24820.3	14955.7	23481.9	1.23524	0.0841757	0.237144	2.03691	1.02638	up	-	-
MW0005838	6-Phosphogluconic acid	6-磷酸葡萄糖酸	Others	其它类	Saccharides	糖类	C6H13O10P	2	0.7203	921-62-0	11521.4	51189.4	39707.4	1708.54	1997.64	1222.84	1.38946	0.110143	0.268417	20.7786	4.37703	up	C00345	ko00030,ko01100,ko01110,ko01200
MW0108187	Met-ala	甲硫氨酰丙氨酸	Amino acids and derivatives	氨基酸及其衍生物	Amino acids and derivatives	氨基酸及其衍生物	C8H16N2O3S	2	0.7178	3061-96-9	42135.6	48068.7	48660.5	4982.63	11106.3	5823.82	1.41134	0.000168183	0.0656186	6.33716	2.66384	up	-	-
MEDP1613	Val-val	缬氨酸-缬氨酸	Amino acids and derivatives	氨基酸及其衍生物	Amino acids and derivatives	氨基酸及其衍生物	C10H20N2O3	2	0.7145	3918-94-3	399633	559878	547480	73561.3	98259.9	99661	1.43924	0.0134309	0.116922	5.55098	2.47274	up	-	-
MW0137947	Dicumarol	双香豆素	Lignans and Coumarins	木脂素和香豆素	Coumarins	香豆素	C19H12O6	2	0.7132	66-76-2	33077	29945.5	29306.1	66251.8	63960.1	56865.5	1.44006	0.00319695	0.0850936	0.493531	-1.01879	down	C00796	-
MW0107036	Glu-Thr	谷氨酸-苏氨酸	Amino acids and derivatives	氨基酸及其衍生物	Amino acids and derivatives	氨基酸及其衍生物	C9H16N2O6	2	0.7118	6875-80-5	206.47	2599.22	1761.63	160147	489319	611782	1.39536	0.0898768	0.243449	0.00362127	-8.10929	down	-	-
MW0010818	(10E,12Z)-9-HODE	(10E,12Z)-9-HODE	Lipids	脂质	Free fatty acids	游离脂肪酸	C18H32O3	2	0.7114	98524-19-7	90383.8	145999	84401.6	939944	842052	506133	1.41051	0.0353813	0.162866	0.140195	-2.83449	down	-	-
MW0157896	L-Lysine, L-threonyl-	L-赖氨酸、L-苏氨酰-	Amino acids and derivatives	氨基酸及其衍生物	Amino acids and derivatives	氨基酸及其衍生物	C10H21N3O4	2	0.7081	23161-31-1	107824	47757.1	172583	8473.73	6324.32	10892	1.38732	0.107367	0.266124	12.774	3.67514	up	-	-
MW0013395	1-hexadecanoyl-2-(5Z,8Z,11Z,14Z-eicosatetraenoyl)-sn-glycero-3-phosphoethanolamine	2-花生四烯酰基-1-棕榈酰基-sn-甘油-3-磷酸乙醇胺	GP	甘油磷脂类	PE	磷脂酰乙醇胺	C41H74NO8P	2	0.7077	70812-59-8	20864.2	17183	31686.4	73081.4	81272.6	70370.9	1.39004	0.000977246	0.0686411	0.310306	-1.68823	down	-	-
MEDN0551	3-Indoleacrylic acid	3-吲哚丙烯酸	Alkaloids	生物碱	Plumerane	吲哚类生物碱	C11H9NO2	3	0.9944	29953-71-7	8980.02	5888.2	7333.25	28677	43535.9	23608.5	1.39895	0.0517177	0.190755	0.231696	-2.10969	down	-	-
MEDN0017	D-Pyroglutamic acid	D-焦谷氨酸	Amino acids and derivatives	氨基酸及其衍生物	Amino acids and derivatives	氨基酸及其衍生物	C5H7NO3	3	0.9848	4042-36-8	43723.6	50626.4	31902.5	152053	112190	118474	1.40139	0.0103128	0.111886	0.329885	-1.59997	down	C02237	ko00470,ko01100
MEDL01970	Corilagin	鞣料云实素	Tannins	鞣质	Tannin	鞣质	C27H22O18	3	0.9778	23094-69-1	2.17948e+06	1.57829e+06	2.03466e+06	70642.9	76564.7	419715	1.33173	0.00245729	0.0820354	10.2173	3.35295	up	C10219	-
FDATN01519	D-phenylalanine	D-苯丙氨酸	Amino acids and derivatives	氨基酸及其衍生物	Amino acids and derivatives	氨基酸及其衍生物	C9H11NO2	3	0.9771	673-06-3	87176.8	121099	110323	262574	220767	241904	1.40641	0.00114329	0.0714974	0.439297	-1.18673	down	C02265	ko00360,ko00470,ko01100
MEDN1093	(2S)-2-Isopropylmalate	2-异丙基苹果酸	Organic acids	有机酸	Organic acids	有机酸	C7H12O5	3	0.972	49601-06-1	60880.3	153491	141917	52430.7	59432.6	53181.8	1.11687	0.159401	0.32468	2.15873	1.11019	up	C02504	ko00290,ko00620,ko01100,ko01110,ko01210,ko01230
MEDN0151	Adenine	腺嘌呤	Nucleotides and derivatives	核苷酸及其衍生物	Nucleotides and derivatives	核苷酸及其衍生物	C5H5N5	3	0.9705	73-24-5	52842	65309.9	77981	9125.84	9083.69	18790.3	1.3943	0.00882962	0.106899	5.30091	2.40624	up	C00147	ko00230,ko00908,ko01100,ko01110,ko01232
MEDN0198	Citric acid	柠檬酸	Organic acids	有机酸	Organic acids	有机酸	C6H8O7	3	0.9695	77-92-9	6.69281e+06	1.02515e+07	1.12763e+07	2.31085e+06	1.7748e+06	2.35443e+06	1.42008	0.032752	0.157371	4.38203	2.1316	up	C00158	ko00020,ko00250,ko00630,ko01100,ko01110,ko01200,ko01210,ko01230,ko01240
MEDN0627	Ellagic acid	鞣花酸	Tannins	鞣质	Tannin	鞣质	C14H6O8	3	0.9676	476-66-4	1.50548e+06	1.78275e+06	1.85779e+06	193627	198500	344856	1.43036	0.00150297	0.0757164	6.98255	2.80375	up	C10788	-
MEDN0056	N-Acetylleucine	N-乙酰基亮氨酸	Amino acids and derivatives	氨基酸及其衍生物	Amino acids and derivatives	氨基酸及其衍生物	C8H15NO3	3	0.9673	1188-21-2	27613	35941.2	38940.5	17469.5	11742.9	12428.3	1.38278	0.0126734	0.115113	2.46141	1.29948	up	C02710	-
MW0126947	Vidarabine	阿糖腺苷	Nucleotides and derivatives	核苷酸及其衍生物	Nucleotides and derivatives	核苷酸及其衍生物	C10H13N5O4	3	0.9636	24356-66-9	83600.1	108077	126041	4713.61	17862.3	32114	1.26006	0.00636994	0.101413	5.80944	2.5384	up	C07195	-
MEDN1060	(±)-erythro-Isoleucine	L-别异亮氨酸	Amino acids and derivatives	氨基酸及其衍生物	Amino acids and derivatives	氨基酸及其衍生物	C6H13NO2	3	0.96	443-79-8	16953.9	14953.8	13795.5	54162.4	45711.3	49954.3	1.44882	0.00197081	0.0802	0.305039	-1.71294	down	C16434	-
MEDL02580	Cinnamtannin B2	肉桂单宁 B2	Tannins	鞣质	Tannin	鞣质	C60H48O24	3	0.9597	88038-12-4	1.12878e+06	914480	1.20881e+06	319092	377436	622682	1.32024	0.00736767	0.10294	2.46517	1.30169	up	C17629	-
MW0168671	Abietic acid	松香酸	Terpenoids	萜类	Ditepenoids	二萜	C20H30O2	3	0.9568	514-10-3	17551.7	15482.5	14244.9	22720.3	62603.9	155367	1.13437	0.242483	0.408097	0.196431	-2.34791	down	C06087	ko00904,ko01100,ko01110
MEDL02577	Procyanidin C1	原花青素 C1	Tannins	鞣质	Proanthocyanidins	原花青素	C45H38O18	3	0.9563	37064-30-5	1.11951e+07	1.16226e+07	1.22507e+07	1.98488e+06	2.37759e+06	6.71528e+06	1.25619	0.0299551	0.153711	3.16567	1.66251	up	C17624	-
MEDN1303	D-Mannose 1-phosphate	甘露糖1-磷酸	Others	其它类	Saccharides	糖类	C6H13O9P	3	0.9492	27251-84-9	806060	321155	728988	1.78933e+06	3.32367e+06	3.01205e+06	1.32951	0.0365367	0.165073	0.228454	-2.13002	down	-	-
MEDL02155	Threonic acid	D-苏糖酸	Others	其它类	Saccharides	糖类	C4H8O5	3	0.949	3909-12-4	108257	123023	168599	275221	278044	392480	1.34824	0.0263476	0.148262	0.422819	-1.24189	down	C21649	-
MEDN0203	cis-Aconitic acid	顺式乌头酸	Organic acids	有机酸	Organic acids	有机酸	C6H6O6	3	0.9355	585-84-2	129742	166007	164773	34709.2	34845.7	28527.2	1.44924	0.00803211	0.103511	4.69528	2.23121	up	C00417	ko00020,ko00630,ko00660,ko01100,ko01110,ko01210
MEDL01764	Maritimetin	海生菊苷	Flavonoids	黄酮	Other Flavonoids	其它类黄酮	C15H10O6	3	0.928	576-02-3	14121.3	13433.8	23944.5	48423.6	46791.3	49052.8	1.3722	0.0096612	0.109708	0.356973	-1.48611	down	C08720	-
MEDN1144	alpha-Dimorphecolic acid	9(S)-HODE	Lipids	脂质	Free fatty acids	游离脂肪酸	C18H32O3	3	0.925	73543-67-6	64178.6	66056.1	46123.4	302959	299080	134715	1.34358	0.0760913	0.225768	0.239372	-2.06267	down	C14767	ko00591
MEDP0495	LPC(0:0/18:2)	溶血PC(0:0/18:2(9Z,12Z))	GP	甘油磷脂类	LPE	溶血磷脂酰乙醇胺	C26H50NO7P	3	0.9217	27304-12-7	440534	430794	532239	101611	163927	341911	1.1624	0.0490106	0.185946	2.31059	1.20826	up	-	-
MEDN0224	Trehalose	D-海藻糖	Others	其它类	Saccharides	糖类	C12H22O11	3	0.9181	99-20-7	1.24125e+06	1.09478e+06	1.6967e+06	3.08869e+06	3.10762e+06	4.15971e+06	1.37822	0.0133087	0.116076	0.389409	-1.36064	down	C01083	ko00500,ko01100,ko01110,ko02010
MEDL02262	Trehalose-6-phosphate	海藻糖-6-磷酸	Others	其它类	Saccharides	糖类	C12H23O14P	3	0.9094	4484-88-2	83963.8	131704	116030	224010	241159	234903	1.37112	0.00713683	0.10294	0.473805	-1.07764	down	C00689	ko00500,ko01100,ko01110
MW0132666	Isolimocitrol	3,5,7-三羟基-2-(3-羟基-4-甲氧基苯基)-6,8-二甲氧基-4H-铬-4-酮	Others	其它类	Ketone compounds	酮类化合物	C18H16O9	3	0.9028	1171-97-7	151377	212415	185235	82119.7	73168.5	74773.7	1.42227	0.0242085	0.144938	2.38643	1.25485	up	-	-
MEDN0560	Marmesin	印度枸橘素;异紫花前胡内酯	Lignans and Coumarins	木脂素和香豆素	Coumarins	香豆素	C14H14O4	3	0.9027	13849-08-6	520502	462415	538609	66568.8	91703.4	294177	1.22551	0.0292187	0.153659	3.36286	1.74969	up	C09276	ko00999,ko01110
MW0001682	1'-O-Galloylsucrose	1'-O-没食子基蔗糖	Benzene and substituted derivatives	苯及其衍生物	Benzene and substituted derivatives	苯及其衍生物	C19H26O15	3	0.9014	115713-45-6	252802	163092	190073	410893	422575	405865	1.38117	0.0131645	0.115688	0.488945	-1.03225	down	-	-
MW0137673	Cinnamtannin D2	肉桂单宁D2	Heterocyclic compounds	杂环化合物	Heterocyclic compounds	杂环化合物	C60H48O24	3	0.8996	97233-47-1	2.22642e+06	1.9925e+06	2.60244e+06	669121	554659	1.01184e+06	1.3823	0.00303316	0.0850936	3.05121	1.60938	up	C17633	-
MW0133983	5,6-Dihydroxyflavone	5,6-Dihydroxyflavone	Others	其它类	Ketone compounds	酮类化合物	C15H10O4	3	0.895	6665-66-3	6267.12	10626.7	11017.5	34444.1	75354.2	99791.3	1.36765	0.0855088	0.238009	0.133171	-2.90864	down	-	-
MEDN1035	13R-hydroxy-9Z,11E-octadecadienoic acid	13-羟基十八烷基-9,11-二烯酸	Lipids	脂质	Free fatty acids	游离脂肪酸	C18H32O3	3	0.8921	10219-69-9	2382.43	706.37	2427.07	3179.91	9754.47	6470.57	1.14017	0.125278	0.286203	0.284251	-1.81476	down	-	-
MEDL02390	Procyanidin B3	原花青素 B3	Tannins	鞣质	Proanthocyanidins	原花青素	C30H26O12	3	0.8875	23567-23-9	1.87379e+07	1.62945e+07	1.95481e+07	6.25144e+06	6.2124e+06	1.35776e+07	1.21591	0.04543	0.180429	2.09591	1.06758	up	-	-
MEDL01821	3-Furoic acid	3-糠酸	Organic acids	有机酸	Organic acids	有机酸	C5H4O3	3	0.8871	488-93-7	267584	346247	392985	145226	145390	131769	1.41387	0.0318774	0.156817	2.38365	1.25317	up	-	-
MW0122967	Aurasperone D	金曲酮D	Others	其它类	Ketone compounds	酮类化合物	C31H24O10	3	0.8864	67924-64-5	27033.1	23583.3	17812.2	1502.68	3020.72	1158.84	1.41608	0.0131448	0.115688	12.0425	3.59007	up	C08995	-
MW0123181	Butethal	布泰尔	Heterocyclic compounds	杂环化合物	Heterocyclic compounds	杂环化合物	C10H16N2O3	3	0.8849	77-28-1	50524.9	42128.6	44402.6	7278.15	11351.8	14675.6	1.39631	0.000529111	0.0659656	4.11512	2.04093	up	-	-
MEDN0491	9S-HOTrE	9-羟基-10E,12Z,15Z-十八碳三烯酸	Lipids	脂质	Free fatty acids	游离脂肪酸	C18H30O3	3	0.8792	89886-42-0	102106	123990	103111	385291	315123	202301	1.34609	0.0672575	0.213594	0.364685	-1.45528	down	-	-
MW0159309	Vasicinol	Vasicinol；吡咯并（2，1-b）喹唑啉-3，7-二醇，1，2，3，9-四氢-，（R)-	Alcohol and amines	醇、胺类	Alcohols	醇类	C11H12N2O2	3	0.8785	5081-51-6	30098.3	37298.2	40577.9	4859.03	5026.33	12392.4	1.36223	0.00234736	0.0812817	4.84673	2.27701	up	C10743	-
MEDP1592	Citicoline	胞磷胆碱	Nucleotides and derivatives	核苷酸及其衍生物	Nucleotides and derivatives	核苷酸及其衍生物	C14H26N4O11P2	3	0.8722	987-78-0	144061	158918	203097	5556.79	11164.4	46577.1	1.29348	0.00349809	0.0867975	7.99509	2.99912	up	C00307	ko00564,ko01100
MW0139812	Thalsimine	塔尔西明	Heterocyclic compounds	杂环化合物	Heterocyclic compounds	杂环化合物	C38H40N2O7	3	0.8637	5525-36-0	919026	1.05565e+06	1.3083e+06	360418	389734	443006	1.42335	0.0218546	0.140802	2.75151	1.46022	up	C09661	-
MEDN1385	Daidzein	大豆苷元	Flavonoids	黄酮	Isoflavones	异黄酮	C15H10O4	3	0.8634	486-66-8	4076.74	3995.68	3639.4	779.45	1032.35	638.61	1.43557	7.45932e-05	0.0494446	4.77953	2.25687	up	C10208	ko00943,ko01100,ko01110
MW0153976	Mulberrofuran C	桑呋喃C	Heterocyclic compounds	杂环化合物	Heterocyclic compounds	杂环化合物	C34H28O9	3	0.8492	77996-04-4	136184	168847	141805	9651.97	14849.3	23393.7	1.41962	0.00220678	0.0811752	9.32947	3.2218	up	C08928	-
MEDL01969	Granatin A	石榴皮苦素 A	Tannins	鞣质	Tannin	鞣质	C34H24O22	3	0.8417	73683-70-2	203954	219145	250595	24254.2	15647.3	47843.5	1.39447	0.00056396	0.0668408	7.67787	2.94071	up	-	-
MEDL02583	Procyanidin B4	原花青素 B4	Tannins	鞣质	Proanthocyanidins	原花青素	C30H26O12	3	0.8395	4852-22-6	419569	342613	375111	103521	112246	173715	1.3889	0.0013623	0.0718301	2.92001	1.54598	up	C10238	-
MEDL00328	UDP-xylose	尿苷-5'-二磷酸-D-木糖	Nucleotides and derivatives	核苷酸及其衍生物	Nucleotides and derivatives	核苷酸及其衍生物	C14H22N2O16P2	3	0.835	3616-06-6	278155	322106	304262	80470.1	124062	165415	1.32267	0.00750353	0.10294	2.44501	1.28984	up	C00190	ko00520,ko00908,ko01100,ko01250
MEDP0899	3-Methyladenine	3-甲基腺嘌呤	Nucleotides and derivatives	核苷酸及其衍生物	Nucleotides and derivatives	核苷酸及其衍生物	C6H7N5	3	0.8328	5142-23-4 | 60192-57-6	96611.5	95760.6	119265	22029.4	26615.4	22741.9	1.44969	0.00749751	0.10294	4.36547	2.12614	up	C00913	-
MW0000157	Bulbocapnine	球紫堇碱	Alkaloids	生物碱	Aporphine alkaloids	阿朴啡型生物碱	C19H19NO4	3	0.829	298-45-3	28754.3	35714	37529.5	11378.7	14019.1	7831.38	1.39027	0.0033744	0.0850936	3.06952	1.61801	up	C09367	-
MW0153343	Maltohexanose	麦芽六糖	Others	其它类	Saccharides	糖类	C36H62O31	3	0.8216	34620-77-4	628.78	1580.99	2001.21	83.46	314.46	347.85	1.22673	0.0990069	0.253471	5.64649	2.49735	up	C01936	-
MW0134235	Arachidin-1	5-[（E)-2-(3，4-二羟基苯基）乙烯基]-2-[（1E)-3-甲基丁-1-烯-1-基]苯-1，3-二醇	Benzene and substituted derivatives	苯及其衍生物	Benzene and substituted derivatives	苯及其衍生物	C19H20O4	3	0.8031	98391-38-9	75649.7	135695	109117	461706	330134	222438	1.30922	0.0711948	0.218916	0.315951	-1.66223	down	-	-
MEDN1160	Mevalonate 5-phosphate	甲戊酸 5-磷酸酯	Organic acids	有机酸	Organic acids	有机酸	C6H13O7P	3	0.8014	73566-35-5	78111.9	47019	74157.8	153605	178326	217974	1.3716	0.0115395	0.112902	0.362405	-1.46432	down	C01107	ko00900,ko01100,ko01110
MW0139418	Procyanidin B5	原花青素 B5	Tannins	鞣质	Proanthocyanidins	原花青素	C30H26O12	3	0.7981	12798-57-1	6.34184e+06	5.73328e+06	6.56229e+06	1.12447e+06	1.52988e+06	3.12707e+06	1.30908	0.0108215	0.112223	3.22367	1.68871	up	C17640	-
MEDL01834	Capsianoside I	辣椒萜苷 I	Terpenoids	萜类	Ditepenoids	二萜	C32H52O14	3	0.7956	121924-04-7	112376	85695.6	100460	29809.9	23654	50519.7	1.33642	0.00446733	0.0955227	2.87094	1.52153	up	-	-
MW0148947	(2S,3S)-2-(3,4-dihydroxyphenyl)-8-[(2R,3R,4R)-2-(3,4-dihydroxyphenyl)-3,5,7-trihydroxy-chroman-4-yl]chromane-3,5,7-triol	表儿茶素-(4beta->8)-表儿茶素	Flavonoids	黄酮	Flavanols	黄烷醇类	C30H26O12	3	0.7921	82262-99-5	3.64302e+07	2.78832e+07	3.47985e+07	4.22007e+06	6.95167e+06	2.75227e+07	1.07676	0.098414	0.25269	2.5614	1.35693	up	C10221	-
MW0156350	Rehmaionoside C	地黄苷C	Terpenoids	萜类	Terpene	萜类	C19H32O8	3	0.79	104112-05-2	1.00118e+06	818647	712442	2.40914e+06	2.40886e+06	1.72041e+06	1.39409	0.0185377	0.132677	0.387292	-1.36851	down	C17452	-
MEDN0092	3,4-Dihydroxybenzeneacetic acid	3,4-二羟基苯乙酸	Phenolic acids	酚酸类	Phenolic acids	酚酸类	C8H8O4	3	0.7845	102-32-9	10619	8362.75	8353.66	82243.3	57468.5	25327.3	1.3417	0.108004	0.266847	0.16563	-2.59396	down	C01161	ko00350,ko01100
MW0052355	Digoxin	地高辛	Steroids	甾体	Steroid	甾体	C41H64O14	3	0.7768	20830-75-5	18604.8	28423.3	24046.9	13692.1	11835.8	7470.59	1.28079	0.0262383	0.148262	2.15388	1.10694	up	C06956	-
MW0150566	Glycobismine A	甘氨双胺A	Heterocyclic compounds	杂环化合物	Heterocyclic compounds	杂环化合物	C37H34N2O6	3	0.7754	91147-20-5	109692	100564	140886	74405.8	70815.2	19614.3	1.04619	0.0514657	0.190431	2.13026	1.09103	up	C10685	-
MEDN1397	Succinylacetone	4,6-二氧庚酸	Organic acids	有机酸	Organic acids	有机酸	C7H10O4	3	0.7752	51568-18-4	392804	382916	476966	126560	159418	175769	1.41968	0.0047364	0.0969504	2.71293	1.43985	up	-	-
MW0122652	1,3,7,8-Tetramethylxanthine	8-甲基咖啡因	Heterocyclic compounds	杂环化合物	Heterocyclic compounds	杂环化合物	C9H12N4O2	3	0.7705	832-66-6	5002.59	15726	9756.24	2849.99	4193.91	6445.44	1.00153	0.202149	0.367111	2.25992	1.17627	up	-	-
MW0134489	Calycopterin	5-羟基-2-(4-羟基苯基)-3,6,7,8-四甲氧基-4H-铬-4-酮	Others	其它类	Ketone compounds	酮类化合物	C19H18O8	3	0.7683	481-52-7	189722	184864	217271	93633.6	37258.7	27547.3	1.30824	0.00887397	0.106899	3.73554	1.90132	up	-	-
MW0130215	4H-1-Benzopyran-4-one, 2-(3,5-dihydroxyphenyl)-3,5,7-trihydroxy-	2-(3，5-二羟基苯基)-3，5，7-三羟基-4H-苯并吡喃-4-酮	Others	其它类	Ketone compounds	酮类化合物	C15H10O7	3	0.765	28449-61-8	155914	285695	282451	81507.8	92443	98447.6	1.34182	0.0700914	0.216816	2.65809	1.41039	up	-	-
MEDN0300	Azelaic acid	壬二酸	Organic acids	有机酸	Organic acids	有机酸	C9H16O4	3	0.7636	123-99-9	557684	510226	583009	220307	263262	217084	1.43918	0.000488276	0.0659656	2.35626	1.2365	up	C08261	-
MW0147780	Corniculatusin	百脉根素	Flavonoids	黄酮	Flavones	黄酮	C16H12O8	3	0.7595	27500-34-1	3452.58	19902	22725.7	762.7	2696.59	1266.04	1.22179	0.147543	0.311465	9.75177	3.28566	up	C04527	-
MEDN0152	Adenosine 5'-Diphosphate（ADP）	腺苷-5'-二磷酸	Nucleotides and derivatives	核苷酸及其衍生物	Nucleotides and derivatives	核苷酸及其衍生物	C10H15N5O10P2	3	0.7555	58-64-0	5891.09	5613.99	6375.86	23058	15266.5	11975.2	1.35366	0.0806811	0.231946	0.355488	-1.49213	down	C00008	ko00190,ko00195,ko00230,ko00908,ko01100,ko01110,ko01232,ko01240
MW0169251	Harmine	去氢骆驼蓬碱	Alkaloids	生物碱	Alkaloids	生物碱	C13H12N2O	3	0.7551	442-51-3	249203	114751	101303	704598	552668	452926	1.33559	0.012959	0.115634	0.27205	-1.87806	down	C06538	ko00901
MW0138241	Sophoricoside	槐角苷	Flavonoids	黄酮	Isoflavones	异黄酮	C21H20O10	3	0.7526	152-95-4	123832	51501.6	12834.9	104992	184766	236557	1.02736	0.0899402	0.243479	0.357521	-1.4839	down	-	-
MW0152837	Lycoricidine	石蒜西定; 7-脱氧水仙环素	Alkaloids	生物碱	Isoquinoline alkaloids	异喹啉类生物碱	C14H13NO6	3	0.7526	19622-83-4	900956	633348	939280	40177.4	36879	336470	1.22993	0.00769554	0.10294	5.98169	2.58055	up	C08531	-
MEDL01875	[10]-Shogaol	[10]-姜烯酚	Phenolic acids	酚酸类	Phenolic acids	酚酸类	C21H32O3	3	0.7476	36752-54-2	4048.56	7011.67	5544.93	39479.5	33865.4	61490.7	1.42208	0.0415925	0.174178	0.123151	-3.0215	down	-	-
MW0127210	2-(Ethylsulfonyl)ethanol	2-(乙基磺酰基)乙醇	Alcohol and amines	醇、胺类	Alcohols	醇类	C4H10O3S	3	0.746	513-12-2	4204.63	9342.81	9006.19	1030.22	1608.69	565.23	1.35918	0.0560611	0.198231	7.0389	2.81535	up	-	-
MW0133443	1-(4-Hydroxyphenyl)-1,2-diphenyl-1-butene	4-[（1E)-1,2-二苯基-1-烯-1-基]苯酚	Benzene and substituted derivatives	苯及其衍生物	Benzene and substituted derivatives	苯及其衍生物	C22H20O	3	0.7416	68684-63-9	49411.1	77264.3	63717.9	1383.66	2298.55	961.56	1.44435	0.0162688	0.125812	40.9997	5.35754	up	-	-
MW0139010	Mulberrofuran A	桑呋喃A	Heterocyclic compounds	杂环化合物	Heterocyclic compounds	杂环化合物	C25H28O4	3	0.7401	68978-04-1	154808	45373.6	63263.7	238484	266290	272703	1.25793	0.0282234	0.151946	0.338846	-1.5613	down	C08846	-
MW0137810	Cyanidin 3-O-[b-D-Xylopyranosyl-(1->2)-[(4-hydroxybenzoyl)-(->6)-b-D-glucopyranosyl-(1->6)]-b-D-galactopyranoside]	花青素 3-O-[bD-吡喃木糖基-(1->2)-[(4-羟基苯甲酰基)-(->6)-bD-吡喃葡萄糖基-(1->6)]-bD-吡喃半乳糖苷]	Flavonoids	黄酮	Anthocyanidins	花青素	C39H43O22+	3	0.7385	142506-20-5	34392.7	38220.5	23243.7	13972.4	12483.8	18403.6	1.29399	0.0483954	0.184667	2.13681	1.09546	up	-	-
MW0140108	(+)-Elaeocarpine	（-)-杜英碱	Heterocyclic compounds	杂环化合物	Heterocyclic compounds	杂环化合物	C16H19NO2	3	0.7381	30891-90-8	49394.3	38619.1	36736.9	161082	122865	146643	1.43452	0.00643533	0.101413	0.28972	-1.78727	down	C10591	-
MEDL02757	Vanilloloside	香草醇苷	Phenolic acids	酚酸类	Phenolic acids	酚酸类	C14H20O8	3	0.7349	74950-96-2	61265.5	58707.7	26288.8	182971	190898	175731	1.36413	0.00294115	0.0850936	0.266124	-1.90983	down	-	-
MEDN1602	3'-Deoxyguanosine	3-脱氧鸟苷	Nucleotides and derivatives	核苷酸及其衍生物	Nucleotides and derivatives	核苷酸及其衍生物	C10H13N5O4	3	0.7349	3608-58-0	23117	28352.3	29845.4	667.39	4862.64	10709.7	1.14007	0.00519129	0.098831	5.00715	2.32399	up	-	-
MEDL02570	Digallic acid	双没食子酸	Phenolic acids	酚酸类	Phenolic acids	酚酸类	C14H10O9	3	0.7336	536-08-3	4432.65	16475.2	1299.24	27037.5	25025	36017.3	1.14688	0.0218608	0.140802	0.252125	-1.98779	down	C01572	-
MW0147045	Canaliculatol	小管醇	Heterocyclic compounds	杂环化合物	Heterocyclic compounds	杂环化合物	C42H32O9	3	0.7297	114488-83-4	10956.3	10860.7	11329.3	33189.6	25101.9	28354.9	1.43629	0.0166323	0.127429	0.382547	-1.38629	down	C10249	-
MW0008470	N-phenyl-5-pyridin-3-yl-1,3,4-thiadiazol-2-amine	N-phenyl-5-pyridin-3-yl-1,3,4-thiadiazol-2-amine	Benzene and substituted derivatives	苯及其衍生物	Benzene and substituted derivatives	苯及其衍生物	C13H10N4S	3	0.7266	35356-56-0	22762.7	12398.5	10992	60339.1	57813.2	39077.9	1.3508	0.0154393	0.123259	0.29354	-1.76837	down	-	-
MEDP1057	D-inositol-4-phosphate	D-肌醇4-磷酸	Alcohol and amines	醇、胺类	Alcohols	醇类	C6H13O9P	3	0.7254	142760-33-6	242432	342683	333911	109726	121578	133990	1.41023	0.024489	0.145194	2.51585	1.33105	up	C03546	ko00562,ko01100,ko04070
MW0154845	Pachyrrhizone	豆薯酮	Flavonoids	黄酮	Other Flavonoids	其它类黄酮	C20H14O7	3	0.725	42485-00-7 | 478-09-1	136951	157064	136496	324143	275746	276430	1.42971	0.00501569	0.0973674	0.491273	-1.0254	down	-	-
MW0144837	Alangimarine	阿兰吉马林	Heterocyclic compounds	杂环化合物	Heterocyclic compounds	杂环化合物	C19H16N2O3	3	0.7203	77156-16-2	81751.9	174217	162008	47830.4	54808.8	36161.3	1.30972	0.0802101	0.231268	3.01135	1.59041	up	C09329	-
MW0140477	Glutaryl-7-aminocephalosporanic acid	戊二酰-7-氨基头孢菌酸	Heterocyclic compounds	杂环化合物	Heterocyclic compounds	杂环化合物	C15H18N2O8S	3	0.7131	27920-90-7	118508	139553	247156	51076.2	82562.1	24904.5	1.21736	0.0850095	0.237481	3.18662	1.67203	up	-	-
MEDL01901	2,3,4,5-tetrahydroxy-8-(3,5,7-trihydroxy-3,4-dihydro-2H-chromen-2-yl)benzo[7]annulen-6-one	茶黄棓灵	Tannins	鞣质	Tannin	鞣质	C20H16O9	3	0.713	102208-15-1	12553.3	22936.8	51800.8	145142	143701	186199	1.32155	0.00231845	0.0812817	0.183754	-2.44415	down	-	-
MW0109534	Ropivacaine	罗哌卡因	Heterocyclic compounds	杂环化合物	Heterocyclic compounds	杂环化合物	C17H26N2O	3	0.7129	84057-95-4	15573.8	14806.3	26856.7	7157.9	5325.39	14713.7	1.09273	0.113445	0.272745	2.10453	1.0735	up	C07532	-
MEDN0683	2-Naphthol	2-萘酚	Phenolic acids	酚酸类	Phenolic acids	酚酸类	C10H8O	3	0.7119	135-19-3	31103.3	74035.3	61146.1	20169.6	24178	17424.4	1.2611	0.108185	0.266867	2.69191	1.42863	up	C11713	-
MW0138082	Epigallocatechin-(4beta->8)-epicatechin-3-O-gallate ester	表没食子儿茶素-(4BETA->8)-表儿茶素3-O-没食子酸酯	Flavonoids	黄酮	Flavanols	黄烷醇类	C37H30O17	3	0.7097	126715-82-0	91294.3	91944.8	131410	7348.04	16402.4	34768.2	1.30183	0.00916154	0.107897	5.37692	2.42678	up	C10223	-
MEDL02579	Cinnamtannin A2	肉桂单宁 A2	Tannins	鞣质	Tannin	鞣质	C60H50O24	3	0.7093	86631-38-1	1.7273e+06	1.45309e+06	2.00092e+06	324840	369080	798720	1.32912	0.00495529	0.0973674	3.47125	1.79545	up	C17625	-
MEDN0561	Spaglumic acid	N-乙酰天冬氨酰谷氨酸	Amino acids and derivatives	氨基酸及其衍生物	Amino acids and derivatives	氨基酸及其衍生物	C11H16N2O8	3	0.7028	3106-85-2	242933	363131	411972	117313	123807	126401	1.39482	0.0493106	0.186157	2.77001	1.46989	up	C12270	ko00250,ko01100
MW0002160	Biphenyl-2,3-diol	2,3-二羟基联苯	Benzene and substituted derivatives	苯及其衍生物	Benzene and substituted derivatives	苯及其衍生物	C12H10O2	3	0.6997	1133-63-7	42815.3	78782.3	50524.5	158845	139765	75985	1.15352	0.0983641	0.25269	0.459489	-1.1219	down	C02526	ko01100
MW0006086	Aspulvinone E	Aspulvinone E	Phenolic acids	酚酸类	Phenolic acids	酚酸类	C17H12O5	3	0.6996	49637-60-7	256662	145110	167299	454801	365506	437137	1.33616	0.00714236	0.10294	0.452562	-1.14381	down	C02006	-
MEDN0433	8-Hydroxy-2'-deoxyguanosine	8-羟基-2'-脱氧鸟苷	Nucleotides and derivatives	核苷酸及其衍生物	Nucleotides and derivatives	核苷酸及其衍生物	C10H13N5O5	3	0.6941	88847-89-6	28204.2	31236.2	33920.5	94327	76705.6	38355.4	1.16005	0.142758	0.305392	0.445875	-1.16529	down	-	-
MW0130129	[2-(3,4-dihydroxyphenyl)-3,7-dihydroxy-3,4-dihydro-2H-chromen-5-yl] 3,4,5-trihydroxybenzoate	2-(3，4-二羟基苯基)-3，7-二羟基-3，4-二氢-2H-1-苯并吡喃-5-基3，4，5-三羟基苯甲酸酯	Benzene and substituted derivatives	苯及其衍生物	Benzene and substituted derivatives	苯及其衍生物	C22H18O10	3	0.6911	128232-62-2	224946	283916	222768	14723.9	53464.4	174682	1.05958	0.0611652	0.20603	3.01243	1.59093	up	-	-
MEDL01790	Cinnamtannin B1	肉桂单宁 B1	Tannins	鞣质	Tannin	鞣质	C45H36O18	3	0.6907	88082-60-4	1.58871e+06	2.3482e+06	2.19351e+06	401033	955149	680181	1.31081	0.011213	0.112902	3.01047	1.58999	up	C17631	-
MEDN1442	8-Hdohe	8-羟基-4Z,6E,10Z,13Z,16Z,19Z-二十二碳六烯酸	Lipids	脂质	Free fatty acids	游离脂肪酸	C22H32O3	3	0.689	90780-54-4	3150.83	679.31	1829.48	16097.9	55906.9	609462	1.26676	0.360509	0.520299	0.00830506	-6.91179	down	-	-
MW0112710	3,4-Di-O-galloylquinic acid	3,4-二-O-没食子酰奎宁酸	Organic acids	有机酸	Organic acids	有机酸	C21H20O14	3	0.6884	86687-37-8	6260.46	6447.35	8215.63	276.7	512.29	2142.68	1.28789	0.00221133	0.0811752	7.13704	2.83533	up	-	-
MEDL02128	Pyridoxal phosphate	吡哆醛-5'-磷酸	Others	其它类	Vitamin	维生素	C8H10NO6P	3	0.6882	54-47-7	11692.3	8794.21	10912.1	35389.9	36970.1	22778.3	1.38695	0.037733	0.167863	0.330031	-1.59933	down	C00018	ko00730,ko00750,ko01100,ko01240
MW0157031	Ser-Tyr	L-丝氨酰-L-酪氨酸	Amino acids and derivatives	氨基酸及其衍生物	Amino acids and derivatives	氨基酸及其衍生物	C12H16N2O5	3	0.687	21435-27-8	779948	526218	490478	2.62945e+06	2.72172e+06	1.78562e+06	1.4059	0.0195659	0.135704	0.251744	-1.98997	down	-	-
MW0118077	1h-Benzimidazole, 2-[(2,2-diethoxyethyl)thio]-	1h-苯并咪唑，2-[(2,2-二乙氧基乙基)硫代]-	Benzene and substituted derivatives	苯及其衍生物	Benzene and substituted derivatives	苯及其衍生物	C13H18N2O2S	3	0.6857	46911-49-3	3343.9	5334.01	5043.22	1461.41	247.85	1899.93	1.13933	0.0146141	0.120825	3.80172	1.92665	up	-	-
mws0895	Genistin	染料木苷(金雀异黄苷)	Flavonoids	黄酮	Isoflavones	异黄酮	C21H20O10	3	0.6856	529-59-9	323741	673279	422126	99059.7	242275	337982	1.00092	0.130365	0.290953	2.08908	1.06287	up	C09126	ko00943
MEDL02741	Xanthoxylin	花椒油素;秦椒素	Phenolic acids	酚酸类	Phenolic acids	酚酸类	C10H12O4	3	0.6821	90-24-4	37754.9	47591.2	42932.5	1215.45	1097.24	5989.79	1.36986	0.000899272	0.0686411	15.4506	3.94959	up	C10726	-
MW0107564	Ile-gly	异亮氨酸甘氨酸	Amino acids and derivatives	氨基酸及其衍生物	Amino acids and derivatives	氨基酸及其衍生物	C8H16N2O3	3	0.682	868-28-0	15312.7	25590.5	15942.5	56186.6	77265	47428.9	1.36665	0.0306451	0.154726	0.314272	-1.66991	down	-	-
MW0049032	Cortisol 21-sulfate	21-硫酸皮质醇	Others	其它类	Lactones	内酯类化合物	C21H30O8S	3	0.679	1253-43-6	66675.8	40259.6	46317.2	139617	101241	129615	1.3588	0.00901916	0.107858	0.413668	-1.27345	down	-	-
MW0146926	Butrin	布特林；丁素7，3′-二-O-葡萄糖苷	Flavonoids	黄酮	Flavones	黄酮	C27H32O15	3	0.6783	492-13-7	2.49441e+06	1.79568e+06	1.52591e+06	3.82281e+06	4.49958e+06	3.65011e+06	1.35048	0.00632395	0.101413	0.48578	-1.04163	down	C09616	-
MADN0626	1,6-di-O-phosphono-D-fructose	1,6-二-O-膦酰基-D-果糖	Organic acids	有机酸	Organic acids	有机酸	C6H14O12P2	3	0.6781	4937-84-2	101664	149597	144184	42854.2	48818.9	38677.7	1.41847	0.0246779	0.145194	3.0337	1.60108	up	-	-
MW0107182	Glycylmethionine	甘氨酰甲硫氨酸	Amino acids and derivatives	氨基酸及其衍生物	Amino acids and derivatives	氨基酸及其衍生物	C7H14N2O3S	3	0.6777	554-94-9	85535.4	106981	123794	33795	24723.7	48742.9	1.35636	0.00952397	0.109689	2.94896	1.56021	up	-	-
MEDP1652	Leucovorin	10-甲酰基-7,8-二氢叶酸	Heterocyclic compounds	杂环化合物	Pteridines and derivatives	蝶啶及其衍生物	C20H23N7O7	3	0.677	58-05-9 | 1492-18-8	43199.1	71861.1	44817.7	242376	203919	273224	1.41888	0.00437772	0.0945682	0.222201	-2.17006	down	-	-
MW0151275	Hymenocardine	膜卡定	Benzene and substituted derivatives	苯及其衍生物	Benzene and substituted derivatives	苯及其衍生物	C37H50N6O6	3	0.6753	19771-56-3	806.62	3303.19	1396.65	9734.46	3399.37	3065.91	1.02053	0.236936	0.403616	0.33991	-1.55677	down	C10004	-
MW0112811	3-Galactosyllactose	3'-半乳糖半乳糖	Others	其它类	Saccharides	糖类	C18H32O16	3	0.6752	32694-82-9	44293.2	28880.1	24363.6	8080.98	17493.9	7661.09	1.25929	0.0506968	0.188921	2.93468	1.5532	up	-	-
MW0148692	D-Ribitol-5-phosphate	D-核糖醇-5-磷酸	Organic acids	有机酸	Organic acids	有机酸	C5H13O8P	3	0.6734	35320-17-3 | 3506-18-1 | 51584-96-4	17270.8	8346.32	9865.39	126334	269460	87585.3	1.39606	0.113846	0.273418	0.0734052	-3.76797	down	C01068	ko00040,ko00515,ko01100
MEDL01905	4',5,6,7-Tetramethoxyflavone	4',5,6,7-四甲氧基黄酮	Flavonoids	黄酮	Flavones	黄酮	C19H18O6	3	0.673	1168-42-9	36416.9	97780.2	117660	348624	370402	164402	1.19187	0.0699562	0.216609	0.28509	-1.81051	down	C14472	-
MW0142688	3,4-Dihydroxyphthalic acid	3,4-二羟基邻苯二甲酸酯; 3,4-二羟基邻苯二甲酸	Benzene and substituted derivatives	苯及其衍生物	Benzene and substituted derivatives	苯及其衍生物	C8H6O6	3	0.6728	82784-82-5	149684	136694	138056	33505.2	45171	45603.2	1.43591	6.33184e-05	0.0489663	3.41516	1.77195	up	C03223	ko01100
MW0004186	6-Amino-N-[3-[4-(4-morpholinyl)pyrido[3',2':4,5]furo[3,2-d]pyrimidin-2-yl]phenyl]-3-pyridinecarboxamide	6-氨基-N-[3-[4-(4-吗啉基)吡啶并[3',2':4,5]呋喃[3,2-d]嘧啶-2-基]苯基]-3-吡啶甲酰胺	Benzene and substituted derivatives	苯及其衍生物	Benzene and substituted derivatives	苯及其衍生物	C25H21N7O3	3	0.6719	371942-69-7	4564.38	6880.13	8567.61	17292.6	15478.1	12291.5	1.29221	0.0123717	0.114817	0.444101	-1.17104	down	-	-
MW0156343	Rebaudioside B	莱鲍迪甙B	Terpenoids	萜类	Ditepenoids	二萜	C38H60O18	3	0.6708	58543-17-2	307256	378206	312638	117092	129141	133510	1.44009	0.00949182	0.109689	2.62836	1.39417	up	-	-
MW0151663	Ile-Ala	异亮氨酸丙氨酸	Amino acids and derivatives	氨基酸及其衍生物	Amino acids and derivatives	氨基酸及其衍生物	C9H18N2O3	3	0.6707	24787-73-3	76319.2	123017	198377	27199.7	63796.9	61976.9	1.12915	0.138096	0.300264	2.59988	1.37845	up	-	-
MEDL02232	Salicin	水杨苷	Phenolic acids	酚酸类	Phenolic acids	酚酸类	C13H18O7	3	0.6701	138-52-3	171968	198865	92502.6	338541	436921	207039	1.11898	0.104753	0.262873	0.471588	-1.0844	down	C01451	ko00010
MEDP0051	L-cystathionine	L-胱硫醚	Amino acids and derivatives	氨基酸及其衍生物	Amino acids and derivatives	氨基酸及其衍生物	C7H14N2O4S	3	0.6683	56-88-2	20352	37624.2	41423.6	13134.5	14282.2	9448.48	1.29866	0.0781288	0.228718	2.69631	1.43098	up	C02291	ko00260,ko00270,ko01100,ko01110,ko01230,ko01240
MEDN0213	Sorbitol	D-山梨糖醇	Others	其它类	Saccharides	糖类	C6H14O6	3	0.6662	50-70-4	5.1251e+06	7.7034e+06	8.00962e+06	3.34465e+06	2.63691e+06	2.81059e+06	1.37463	0.0420723	0.175409	2.37008	1.24494	up	C00794	ko00051,ko00052,ko01100,ko02010
MW0000476	Usambarine	乌桑巴林	Alkaloids	生物碱	Alkaloids	生物碱	C30H34N4	3	0.6662	35226-29-0	3123.17	5096.36	6421.32	21382.3	18638.5	23112.7	1.39399	0.00085325	0.0686411	0.231903	-2.10841	down	C09250	-
MW0139190	(1R,4E,5'S,6S,6'S,7R,8S,10R,11R,12S,14R,15S,16R,18E,20E,22R,25S,27R,28S)-22-ethyl-7,11,14,15-tetrahydroxy-6'-[(2R)-2-hydroxypropyl]-5',6,8,10,12,14,16,28,29-nonamethylspiro[2,26-dioxabicyclo[23.3.1]nonacosa-4,18,20-triene-27,2'-oxane]-3,9,13-trione	(1R,4E,5'S,6S,6'S,7R,8S,10R,11R,12S,14R,15S,16R,18E,20E,22R,25S,27R,28S)-22-ethyl-7,11,14,15-tetrahydroxy-6'-[(2R)-2-hydroxypropyl]-5',6,8,10,12,14,16,28,29-nonamethylspiro[2,26-dioxabicyclo[23.3.1]nonacosa-4,18,20-triene-27,2'-oxane]-3,9,13-trione	Heterocyclic compounds	杂环化合物	Heterocyclic compounds	杂环化合物	C45H74O11	3	0.6606	579-13-5	3508.84	2283.29	3780.85	688.87	615.62	1239.78	1.35539	0.0231016	0.143893	3.76256	1.91172	up	-	-
MW0114539	beta-D-Glucopyranose, 1-thio-, 1-(4-(methylsulfinyl)-N-(sulfooxy)butanimidate)	3-甲基亚磺酰丙基硫苷	Others	其它类	Glucosinolates	硫苷类	C11H21NO10S3	3	0.6602	554-88-1	94279.6	109132	87511.3	51925.8	38994.7	34514.7	1.3919	0.00298055	0.0850936	2.31931	1.21369	up	C08411	-
MW0138375	(S)-7-(((2-O-6-Deoxy-alpha-L-mannopyranosyl)-beta-D-glucopyranosyl)oxy)-2,3-dihydro-5-hydroxy-2-(3-hydroxy-4-methoxyphenyl)-4H-1-benzopyran-4-one	橙皮素-7-O-新橙皮糖苷 (新橙皮苷)	Flavonoids	黄酮	Flavanones	二氢黄酮	C28H34O15	3	0.6561	13241-33-3	40179.4	14569.2	15866	177143	176621	23448.5	1.01759	0.18088	0.345954	0.187202	-2.41734	down	C09806	ko00941
MEDP1470	Diethyl 2-methyl-3-oxosuccinate	甲基草酰乙酸二乙酯	Organic acids	有机酸	Organic acids	有机酸	C9H14O5	3	0.6543	759-65-9	72722.5	101424	103677	44216	30229.6	20292.5	1.33806	0.00986591	0.110286	2.93254	1.55215	up	C04067	-
MW0158859	Uscharidin	牛角瓜素	Steroids	甾体	Cardiac glycoside	强心苷	C29H38O9	3	0.6542	24321-47-9	754990	1.21425e+06	1.19639e+06	216332	249960	207162	1.43002	0.0303737	0.154477	4.70061	2.23285	up	C08883	-
MW0139483	Quercetin 3-(2-glucosylrhamnoside)	槲皮素3-(2-葡萄糖基鼠李糖苷）	Flavonoids	黄酮	Flavones	黄酮	C27H30O16	3	0.654	143016-74-4	16982.9	9026.2	11997	250.21	582.25	2617.53	1.29727	0.0290202	0.15317	11.0163	3.46157	up	-	-
MEDN0038	Oxiglutatione	氧化型谷胱甘肽	Amino acids and derivatives	氨基酸及其衍生物	Amino acids and derivatives	氨基酸及其衍生物	C20H32N6O12S2	3	0.6526	27025-41-8	37163.6	38017.7	37840.3	509.53	3233.2	9075.39	1.23435	0.00528406	0.0993022	8.81733	3.14034	up	C00127	ko00480,ko01100,ko01240
MW0144825	Ala-His	L-丙氨酸-L-组氨酸	Amino acids and derivatives	氨基酸及其衍生物	Amino acids and derivatives	氨基酸及其衍生物	C9H14N4O3	3	0.6516	3253-17-6	17401.6	21874.4	18399.7	74971.2	29781.5	24558.6	1.0091	0.273787	0.43912	0.446022	-1.16481	down	-	-
MW0114728	Lex-lactose	Lex-lactose	Others	其它类	Saccharides	糖类	C32H55NO25	3	0.651	213250-53-4	188761	97915.8	134983	320525	280192	322887	1.32142	0.0109048	0.112441	0.456538	-1.13119	down	-	-
MEDP1015	5,6-Dihydroxyindole-2-carboxylic acid	5,6-二羟基吲哚-2-羧酸	Alkaloids	生物碱	Plumerane	吲哚类生物碱	C9H7NO4	3	0.6505	4790-08-3	453432	446421	583807	166674	172432	275342	1.35158	0.00807884	0.103511	2.41462	1.2718	up	C04185	ko00350,ko01100
MW0105404	Acesulfame potassium	安赛蜜钾	Heterocyclic compounds	杂环化合物	Heterocyclic compounds	杂环化合物	C4H4KNO4S	3	0.6487	55589-62-3	8345.3	10739.5	9256.26	4647.16	4555.96	4235.14	1.43048	0.0167113	0.127675	2.10899	1.07655	up	-	-
MW0006988	Alphazurine	甲磺脲	Benzene and substituted derivatives	苯及其衍生物	Benzene and substituted derivatives	苯及其衍生物	C37H36N2O9S3	3	0.6484	68921-42-6	5968.85	6268.23	3664.57	38818.6	25566.9	16563.1	1.36635	0.0762704	0.225819	0.196441	-2.34783	down	-	-
MEDN1043	2-(Pyridin-3-yl)-1H-benzo[d]imidazole	2-(3-吡啶基)-苯并咪唑	Benzene and substituted derivatives	苯及其衍生物	Benzene and substituted derivatives	苯及其衍生物	C12H9N3	3	0.6483	1137-67-3	66000.1	50481.4	44675.1	141801	148879	120393	1.41017	0.00200336	0.0802	0.392039	-1.35093	down	-	-
MW0137498	Benzyl cinnamate	肉桂酸苄酯	Benzene and substituted derivatives	苯及其衍生物	Benzene and substituted derivatives	苯及其衍生物	C16H14O2	3	0.6478	103-41-3 | 8014-16-2 | 78277-23-3	11775.4	29488.9	22235	3455.42	3418.6	6188.97	1.34272	0.0778563	0.228641	4.86101	2.28125	up	-	-
MW0157273	Sucrose-6-phosphate	蔗糖-6-磷酸	Others	其它类	Saccharides	糖类	C12H23O14P	3	0.647	22372-29-8	73595.4	97824.4	32351.2	98936.2	177198	137525	1.06951	0.0790911	0.229911	0.492606	-1.02149	down	-	-
MEDL01762	Sakuranetin	5,4'-二羟基-7-甲氧基黄酮 (樱花素)	Flavonoids	黄酮	Flavanones	二氢黄酮	C16H14O5	3	0.6442	2957-21-3	65456	40327.7	46903.7	8020.9	7849.72	36450.8	1.13472	0.0538507	0.193768	2.91826	1.54511	up	C09833	ko00941,ko01110
MW0119277	3-(2,3-Dioxo-1,2,3,4-tetrahydro-quinoxaline-6-sulfonyl)-propionic acid	3-(2,3-Dioxo-1,2,3,4-tetrahydro-quinoxaline-6-sulfonyl)-丙酸	Organic acids	有机酸	Organic acids	有机酸	C11H10N2O6S	3	0.644	436096-98-9	17411.8	27773.2	27126	3863.47	3416.97	3422.93	1.4434	0.0254204	0.147006	6.7559	2.75615	up	-	-
MW0006408	Brazilein	巴西林	Benzene and substituted derivatives	苯及其衍生物	Benzene and substituted derivatives	苯及其衍生物	C16H12O5	3	0.642	600-76-0	99617.4	146820	155125	49912.9	57767.1	69466.6	1.35032	0.0387158	0.168995	2.26684	1.18068	up	-	-
MEDL00865	Guanosine-5'-diphosphate	鸟苷 5-二磷酸	Nucleotides and derivatives	核苷酸及其衍生物	Nucleotides and derivatives	核苷酸及其衍生物	C10H15N5O11P2	3	0.6418	146-91-8 | 157420-46-7 | 105184-12-1 | 105184-46-1	43058.4	55318.3	51466.5	18829.9	12234.5	29884.3	1.27435	0.0120052	0.114148	2.45851	1.29779	up	C00035	ko00230,ko01100,ko01232,ko04144
MW0007776	Hippuric acid, o-methoxy-, methyl ester	甲基邻甲氧基马尿酸	Benzene and substituted derivatives	苯及其衍生物	Benzene and substituted derivatives	苯及其衍生物	C11H13NO4	3	0.6395	27796-49-2	255167	357145	333623	137444	144227	184603	1.36185	0.0203766	0.138227	2.02871	1.02056	up	-	-
MW0143301	N-Methyl-4-dimethylallyltryptophan	4-二甲基烯丙基-L-相思子碱；4-(3-甲基-2-丁烯基)-L-相思	Heterocyclic compounds	杂环化合物	Heterocyclic compounds	杂环化合物	C17H22N2O2	3	0.6391	75917-16-7	33220.9	46307.1	52213.8	7179.17	7343.15	7312.76	1.44619	0.0226619	0.142497	6.03349	2.59299	up	C20410	ko00901,ko01100,ko01110
MW0137038	7-Hydroxy-5-[(3-methylbut-2-en-1-yl)oxy]-2H-1-benzopyran-2-one	7-羟基-5-[（3-甲基-2-烯-1-基）氧]-2H-铬-2-酮	Others	其它类	Ketone compounds	酮类化合物	C14H14O4	3	0.6385	33899-44-4	33144.7	44904.9	30730.1	97044.1	94802.1	80670.7	1.40595	0.00139985	0.0729807	0.399167	-1.32494	down	-	-
MEDP1615	Azobenzene-4-sulfonic acid	对-(苯基偶氮）苯磺酸	Organic acids	有机酸	Organic acids	有机酸	C12H10N2O3S	3	0.6384	2484-88-0	83848.5	70876.6	68164.8	149661	140178	160720	1.43205	0.000708216	0.0679408	0.494697	-1.01538	down	-	-
MEDN0610	2,3-Dinor-TXB2	2,3-二正凝血恶烷	Lipids	脂质	Free fatty acids	游离脂肪酸	C18H30O6	3	0.6366	63250-09-9	80048.4	119104	82043.9	497243	462406	338918	1.42171	0.0146426	0.120825	0.216544	-2.20727	down	-	-
MW0063232	Cholest-7-en-6-one, 2,3,14,20,22,24,25-heptahydroxy-, (2beta,3beta,5beta,22R)-	Cholest-7-en-6-one, 2,3,14,20,22,24,25-heptahydroxy-, (2beta,3beta,5beta,22R)-	Steroids	甾体	Steroid	甾体	C27H44O8	3	0.6341	31385-31-6	1646.09	1813.17	708.58	28942.4	18809.9	7105.56	1.35166	0.115291	0.274363	0.0759752	-3.71833	down	-	-
MW0115294	Glucosinalbin	氨基葡萄糖苷	Organic acids	有机酸	Organic acids	有机酸	C14H19NO10S2	3	0.6334	19253-84-0 | 20196-67-2	196452	316719	361203	58022.8	30944.8	32684.2	1.4137	0.0330022	0.157379	7.18751	2.84549	up	-	-
MW0103633	Nicotinate mononucleotide	烟酸单核苷酸	Nucleotides and derivatives	核苷酸及其衍生物	Nucleotides and derivatives	核苷酸及其衍生物	C11H15NO9P+	3	0.633	321-02-8	145457	138528	150130	31977	46525.1	100423	1.204	0.051692	0.190755	2.42624	1.27872	up	C01185	ko00760,ko01100,ko01240
MEDN0261	Indole-3-propionic acid	3-吲哚丙酸	Alkaloids	生物碱	Plumerane	吲哚类生物碱	C11H11NO2	3	0.6274	830-96-6	63807.3	63118.6	64833.8	199772	176621	180229	1.45461	0.00335167	0.0850936	0.344506	-1.5374	down	-	-
MW0157308	Suspensaside	悬垂性	Benzene and substituted derivatives	苯及其衍生物	Benzene and substituted derivatives	苯及其衍生物	C29H36O16	3	0.6235	84213-44-5	114490	152233	126359	322622	308299	271188	1.41802	0.00129466	0.0714974	0.435736	-1.19847	down	C10499	-
MW0148386	Docosahexaenoic acid	顺式-4,7,10,13,16,19-二十二碳六烯酸	Lipids	脂质	Free fatty acids	游离脂肪酸	C22H32O2	3	0.6234	6217-54-5	109180	88721	89856.5	291554	156687	217990	1.31887	0.0797326	0.231139	0.431918	-1.21117	down	C06429	ko01040
MW0144048	8-Epideoxyloganic acid	8-表脱氧马钱子酸	Organic acids	有机酸	Organic acids	有机酸	C16H24O9	3	0.6226	88668-99-9	83889.5	43289.3	51559.4	151679	136105	155258	1.34814	0.00884111	0.106899	0.403434	-1.30959	down	C11649	-
MW0001650	1-Methyl-N-Phenyl-Indole-3-Carboxamide	1-甲基-N-苯基-吲哚-3-甲酰胺	Benzene and substituted derivatives	苯及其衍生物	Benzene and substituted derivatives	苯及其衍生物	C16H14N2O	3	0.621	82414-31-1	69.31	15.13	152.49	1263.97	14309.6	20394.4	1.33206	0.16924	0.334159	0.00658724	-7.24611	down	-	-
MW0118853	Protionamide	丙硫异烟胺	Alcohol and amines	醇、胺类	Amines	胺类	C9H12N2S	3	0.6201	14222-60-7	108393	66651.6	74676.7	181126	164208	183033	1.36446	0.00848868	0.106245	0.472629	-1.08122	down	-	-
MW0054404	Loganin	马钱子苷;马钱素	Terpenoids	萜类	Monoterpenoids	倍萜	C17H26O10	3	0.6114	18524-94-2	6585.08	1418.17	3564.21	27233.2	21271.3	12061.2	1.26901	0.0536552	0.193768	0.19099	-2.38843	down	C01433	ko00902,ko01100,ko01110
MW0111319	Thiolutin	硫路丁	Heterocyclic compounds	杂环化合物	Heterocyclic compounds	杂环化合物	C8H8N2O2S2	3	0.61	87-11-6	95791.6	100851	105624	6908.89	11472.4	77938.8	1.09548	0.0938046	0.246965	3.13815	1.64991	up	-	-
MW0146376	Aspulvinone H	Aspulvinone H	Phenolic acids	酚酸类	Phenolic acids	酚酸类	C27H28O5	3	0.6085	57744-69-1	36891.1	27950.3	22362.5	71031.3	56571.1	66550.7	1.36552	0.0040596	0.091935	0.449151	-1.15473	down	C02008	-
MW0168807	Baicalin	黄芩苷	Flavonoids	黄酮	Flavones	黄酮	C21H18O11	3	0.6051	21967-41-9 | 31564-28-0	26545.9	51652.1	65302.7	15216.7	9076.1	28944.2	1.12947	0.0999225	0.255028	2.69551	1.43056	up	C10025	-
MW0125007	Methoxybrassinin	甲氧基芸苔素	Heterocyclic compounds	杂环化合物	Heterocyclic compounds	杂环化合物	C12H14N2OS2	3	0.6042	105748-60-5	22842.6	42436.1	51528.6	86.71	2939.55	7515.72	1.12521	0.0452502	0.180429	11.0802	3.46991	up	C08506	-
MW0157955	Tomentosin	托曼托辛	Terpenoids	萜类	Sesquiterpenoids	倍半萜	C15H20O3	3	0.6035	33649-15-9	43474.5	50343.1	57766.5	13771.4	14941.4	12712.7	1.44742	0.0109417	0.112571	3.6592	1.87153	up	C09562	-
MW0108082	Lys-Tyr	L-赖氨酸-L-酪氨酸	Amino acids and derivatives	氨基酸及其衍生物	Amino acids and derivatives	氨基酸及其衍生物	C15H23N3O4	3	0.601	35978-98-4	6928.09	7998.5	10076.6	27080.8	24052.7	22309.8	1.41783	0.00124896	0.0714974	0.340442	-1.55452	down	-	-
MW0157473	Thalidasine	沙利达辛	Lignans and Coumarins	木脂素和香豆素	Lignans	木脂素	C39H44N2O7	3	0.6005	16623-56-6	157954	118599	112521	15818.1	27594.6	20827.7	1.42386	0.0130913	0.115688	6.05653	2.59849	up	C09656	-
MW0137208	8-Hydroxy-7-methoxycoumarin	8-羟基-7-甲氧基香豆素	Lignans and Coumarins	木脂素和香豆素	Coumarins	香豆素	C10H8O4	3	0.5994	19492-03-6	44808.3	40744.2	35696.1	89315.5	84653.5	73922.8	1.42088	0.00317723	0.0850936	0.489119	-1.03174	down	-	-
MW0113878	Alginic acid	海藻酸	Others	其它类	Saccharides	糖类	C12H20O12P2	3	0.5992	9005-32-7	5742.83	3545.64	1047.66	793.54	1381.92	643.03	1.0296	0.203291	0.368753	3.66726	1.8747	up	C01768?	-
MW0007500	Levosimendan	左西孟旦	Benzene and substituted derivatives	苯及其衍生物	Benzene and substituted derivatives	苯及其衍生物	C14H12N6O	3	0.5982	141505-33-1	380454	515557	535871	186324	220842	198791	1.40956	0.0259326	0.148071	2.36301	1.24062	up	-	-
MW0129464	Angoletin	1-(2，4-二羟基-6-甲氧基-3，5-二甲基苯基)-3-苯基丙酮	Others	其它类	Ketone compounds	酮类化合物	C18H20O4	3	0.5977	76444-55-8	121368	57727.9	45050.3	258995	149500	133583	1.1595	0.0970782	0.251644	0.413495	-1.27406	down	-	-
MW0112175	4-(Methylnitrosoamino)-1-(pyridin-3-YL)-1,2-butanedione 2-oxime	4-(甲基亚硝基氨基)-1-(吡啶-3-YL)-1,2-丁二酮2-肟	Others	其它类	Ketone compounds	酮类化合物	C10H12N4O3	3	0.5962	67351-31-9	15670.3	21725.4	15086.7	10319.6	11430	4178.48	1.10559	0.046203	0.181137	2.02416	1.01732	up	-	-
MEDN1054	tetranor-12(R)-HETE	8-羟基-4,6,10-十六碳三烯酸	Lipids	脂质	Free fatty acids	游离脂肪酸	C16H26O3	3	0.5925	135271-51-1	87866.3	82576.5	118871	45944.4	35687.5	35428.8	1.39952	0.028187	0.151946	2.47148	1.30538	up	-	-
MW0006837	Dihydrocitrinone	二氢枸橼酮	Benzene and substituted derivatives	苯及其衍生物	Benzene and substituted derivatives	苯及其衍生物	C13H14O6	3	0.592	65718-85-6	166549	384605	316116	75654.9	108499	204943	1.06915	0.116292	0.275443	2.22893	1.15635	up	-	-
MEDL02471	Flavin adenine dinucleotide	核黄素-5'-腺嘌呤二磷酸	Nucleotides and derivatives	核苷酸及其衍生物	Nucleotides and derivatives	核苷酸及其衍生物	C27H33N9O15P2	3	0.5898	146-14-5	7043.39	7044.14	6938.88	629.45	1315.76	5958.64	1.05739	0.120454	0.279274	2.66027	1.41158	up	C00016	ko00740,ko01100,ko01110,ko01240
MW0114531	Glucobrassicanapin	葡甘蓝素	Organic acids	有机酸	Organic acids	有机酸	C12H21NO9S2	3	0.5833	19041-10-2	79271.5	145586	159009	16689.9	1153.86	1370.96	1.32429	0.0341185	0.160395	19.9777	4.32032	up	-	-
MADN0593	L-Methionylglycine	L-甲硫酰甘氨酸	Amino acids and derivatives	氨基酸及其衍生物	Amino acids and derivatives	氨基酸及其衍生物	C7H14N2O3S	3	0.5764	14486-03-4	30162.6	12400.3	14152.3	110107	52701.8	49337.1	1.27038	0.110018	0.268251	0.26734	-1.90325	down	-	-
MW0010023	Usnic acid	松萝酸	Phenolic acids	酚酸类	Phenolic acids	酚酸类	C18H16O7	3	0.5685	125-46-2	97759.6	56573.5	68462.3	275660	210438	210574	1.39273	0.0068319	0.101929	0.3198	-1.64476	down	-	-
MW0015437	9-Decenoic acid	9-癸烯酸	Lipids	脂质	Free fatty acids	游离脂肪酸	C10H18O2	3	0.5672	14436-32-9	15126.8	10340.1	6670.38	30053	32058.7	33174.1	1.35618	0.00708721	0.10294	0.337272	-1.56802	down	-	-
MW0130099	Leukoefdin	2-(3,4,5-三羟基苯基)-3,4-二氢-2H-1-苯并吡喃-3,4,5,7-四硝基	Benzene and substituted derivatives	苯及其衍生物	Benzene and substituted derivatives	苯及其衍生物	C15H14O8	3	0.566	491-52-1 | 12764-74-8	820.39	4650.58	482.8	20105	17417.3	13795.3	1.29277	0.00355695	0.0877885	0.116018	-3.10758	down	-	-
MEDP1162	1-Methylguanine	1-甲基鸟嘌呤	Nucleotides and derivatives	核苷酸及其衍生物	Nucleotides and derivatives	核苷酸及其衍生物	C6H7N5O	3	0.5508	938-85-2	4426.62	23448.6	16668.4	1100.57	1166.38	1325.02	1.34047	0.133694	0.294882	12.4009	3.63237	up	C04152	-
MW0160302	(Adenin-9-YL-ethoxymethyl)-hydroxyphosphinyl-diphosphate	(Adenin-9-YL-ethoxymethyl)-hydroxyphoshinyl-diphosphate	Organic acids	有机酸	Organic acids	有机酸	C8H14N5O10P3	3	0.5424	129532-77-0	5327.72	1455.31	1276.07	8926.96	10733.6	9326.43	1.25574	0.021546	0.140802	0.278025	-1.84671	down	-	-
MW0144821	Z-Ala-asp-OH	Z-Ala-asp-OH	Amino acids and derivatives	氨基酸及其衍生物	Amino acids and derivatives	氨基酸及其衍生物	C15H18N2O7	3	0.5415	79458-93-8	12208.5	1929.86	4238.46	28350.5	20150.4	20316.5	1.20687	0.0157506	0.123348	0.267038	-1.90488	down	-	-
MW0119288	3-[(4-methylpiperidin-1-yl)methyl]-1H-indole	3-[(4-甲基哌啶-1-基)甲基]-1H-吲哚	Alkaloids	生物碱	Plumerane	吲哚类生物碱	C15H20N2	3	0.5402	21000-95-3	8260.67	15031.9	14587.8	5572	4943.71	5117.91	1.33204	0.0759991	0.225768	2.423	1.2768	up	-	-
MW0139231	Pachyrrhizin	地瓜苷	Heterocyclic compounds	杂环化合物	Heterocyclic compounds	杂环化合物	C19H12O6	3	0.5356	10091-01-7	3193.56	1863.01	1672.86	26505	21693	26867.2	1.44148	0.00310832	0.0850936	0.0896478	-3.47959	down	-	-
MW0114263	Digalacturonate	二半乳糖醛酸	Others	其它类	Saccharides	糖类	C12H18O13	3	0.5169	5894-59-7	14008.9	8136.14	15634	236.1	2083.8	2862.99	1.19975	0.0306125	0.154726	7.28917	2.86575	up	C02273	ko00040,ko01100,ko02010
MW0005263	4-Nitronaphthalene-1,8-dicarboxylic acid	4-硝基萘-1,8-二羧酸	Benzene and substituted derivatives	苯及其衍生物	Benzene and substituted derivatives	苯及其衍生物	C12H7NO6	3	0.5066	5425-83-2	7421.83	5984.27	5482.05	16212.5	16590.5	13078.8	1.41401	0.00550149	0.099615	0.41167	-1.28044	down	-	-
MW0113884	Aloeresin A	芦荟树脂 A	Flavonoids	黄酮	Other Flavonoids	其它类黄酮	C28H28O11	3	0.5036	74545-79-2	148758	162836	150480	57454.5	36385.9	60032.6	1.40301	0.000888539	0.0686411	3.00296	1.58638	up	C17781	-
MW0158510	Tyr-Ile-Val-Glu	酪氨酸-异亮氨酸-缬氨酸-谷氨酸	Amino acids and derivatives	氨基酸及其衍生物	Amino acids and derivatives	氨基酸及其衍生物	C25H38N4O8	2	0.9479	-	2.44592e+06	4.10753e+06	3.82029e+06	608153	637177	663257	1.43512	0.0313651	0.155652	5.43529	2.44236	up	-	-
MW0149933	Glu-Asn-Lys-Asp	谷氨酸-天门冬酰氨-赖氨酸-天门冬氨酸	Amino acids and derivatives	氨基酸及其衍生物	Amino acids and derivatives	氨基酸及其衍生物	C19H32N6O10	2	0.9351	-	126007	101050	124575	52125.1	44107	31696.6	1.39489	0.00244044	0.0820354	2.74866	1.45873	up	-	-
MW0156803	Ser-Ile-Phe-Glu	Ser-Ile-Phe-Glu	Amino acids and derivatives	氨基酸及其衍生物	Amino acids and derivatives	氨基酸及其衍生物	C23H34N4O8	2	0.933	-	2.06065e+06	2.48804e+06	2.49529e+06	854150	870013	814059	1.45002	0.00835298	0.105035	2.77516	1.47257	up	-	-
MW0127608	Epigallocatechin 3,5-digallate	表没食子儿茶素3,5-二没食子酰	Flavonoids	黄酮	Flavanols	黄烷醇类	C29H22O15	2	0.932	-	5094.56	10046.6	7720.38	20195.3	32364.9	16107.6	1.29023	0.0787091	0.229482	0.332929	-1.58671	down	-	-
MW0152326	Leu-Glu-Phe-Glu	Leu-Glu-Phe-Glu	Amino acids and derivatives	氨基酸及其衍生物	Amino acids and derivatives	氨基酸及其衍生物	C25H36N4O9	2	0.9306	-	84728.1	93947.5	94090.3	36852.2	34056.7	54367.7	1.36675	0.0068112	0.101929	2.17731	1.12255	up	-	-
MW0012811	1-Hexadecanoyl-2-(9Z-octadecenoyl)-sn-glycero-3-phospho-(1'-myo-inositol)	1-十六烷基-2-（9Z十八烷基）-sn-甘油-3-磷酸-（1'-肌醇）	GP	甘油磷脂类	PI	磷脂酰肌醇	C43H81O13P	2	0.9259	-	279094	239721	182076	30213.1	54931.7	57870.3	1.39076	0.0154599	0.123259	4.90082	2.29302	up	-	-
MW0138744	Laricitrin 3-galactoside	Laricitrin 3-半乳糖苷	Flavonoids	黄酮	Flavones	黄酮	C22H22O13	2	0.9203	-	36633.1	28153.5	26853	1818.68	4950.71	25536.4	1.03589	0.101885	0.257767	2.83663	1.50418	up	-	-
MW0138745	Laricitrin 3-glucoside	Laricitrin 3-葡萄糖苷	Flavonoids	黄酮	Flavones	黄酮	C22H22O13	2	0.9161	-	383494	556425	483468	50888.3	99036.2	316420	1.14241	0.038534	0.168779	3.05222	1.60986	up	-	-
MW0149382	Gal1-3Gal1-4[Fuc1-3]GlcNAcSp	Gal1-3Gal1-4[Fuc1-3]GlcNAcSp	Others	其它类	Saccharides	糖类	C28H48N4O20	2	0.9141	-	94777.6	268193	391859	91276.4	61568.4	56728.2	1.16492	0.167509	0.33187	3.60176	1.8487	up	-	-
MW0006507	Carmine	胭脂红	Benzene and substituted derivatives	苯及其衍生物	Benzene and substituted derivatives	苯及其衍生物	C22H20O13	2	0.9136	-	1.09813e+06	781408	896250	416989	345717	393599	1.41072	0.0235727	0.143893	2.40057	1.26337	up	-	-
MW0015479	12(13)Ep-9-KODE	反式EKODE-(E)-Ib	Lipids	脂质	Free fatty acids	游离脂肪酸	C18H30O4	2	0.9051	-	164926	300541	210981	1.52737e+06	1.30791e+06	441337	1.25678	0.118449	0.277294	0.206447	-2.27616	down	-	-
MW0148348	D-galactaro-1,4-lactone	D-半乳糖-1，4-内酯	Others	其它类	Ketone compounds	酮类化合物	C6H8O7	2	0.9031	-	99163.6	149099	165167	20362.7	27087.2	17820.3	1.43018	0.0262017	0.148262	6.33412	2.66315	up	C20896	ko00053,ko01100
MW0144635	Ala-Leu-Gly-Ile-Ser	Ala-Leu-Gly-Ile-Ser	Amino acids and derivatives	氨基酸及其衍生物	Amino acids and derivatives	氨基酸及其衍生物	C20H37N5O7	2	0.9006	-	1571.41	1740.65	3961.76	21046.2	15152.7	15188.4	1.38806	0.00939474	0.109527	0.141549	-2.82063	down	-	-
MW0145679	Asn-Arg-Phe-Lys	Asn-Arg-Phe-Lys	Amino acids and derivatives	氨基酸及其衍生物	Amino acids and derivatives	氨基酸及其衍生物	C25H41N9O6	2	0.8978	-	21213.3	18009.3	24921.5	9558.53	8847.75	12314.7	1.36948	0.0155122	0.123259	2.08796	1.06209	up	-	-
MW0158364	Tyr-Ala-Thr-Asp	酪氨酸-丙氨酸-苏氨酸-天门冬氨酸	Amino acids and derivatives	氨基酸及其衍生物	Amino acids and derivatives	氨基酸及其衍生物	C20H28N4O9	2	0.8798	-	686171	255243	229733	973114	1.05769e+06	876748	1.21755	0.0470403	0.182193	0.402795	-1.31188	down	-	-
MW0158878	Val-Ala-Phe-Asp	Val-Ala-Phe-Asp	Amino acids and derivatives	氨基酸及其衍生物	Amino acids and derivatives	氨基酸及其衍生物	C21H30N4O7	2	0.8774	-	842711	725311	581773	2.67719e+06	2.59661e+06	2.00028e+06	1.42414	0.00891592	0.106899	0.295542	-1.75857	down	-	-
MW0150445	Gly-Phe-Asn-Thr-Phe	甘氨酸-苯丙氨酸-天门冬酰胺-苏氨酸-苯丙氨酸	Amino acids and derivatives	氨基酸及其衍生物	Amino acids and derivatives	氨基酸及其衍生物	C28H36N6O8	2	0.8735	-	27360	40061.1	31272.5	22630.2	15381	6757.63	1.12864	0.040687	0.172566	2.20451	1.14046	up	-	-
MW0150223	Glu-Val-Tyr-Asp	谷氨酸-缬氨酸-酪氨酸-天冬酰胺	Amino acids and derivatives	氨基酸及其衍生物	Amino acids and derivatives	氨基酸及其衍生物	C23H32N4O10	2	0.8503	-	8778.93	7344.86	41478.2	109683	114265	36016	1.13749	0.100807	0.255597	0.221577	-2.17412	down	-	-
MW0150895	His-Gln-Asn-Glu	组氨酸-谷酰胺-天门冬酰氨-谷氨酸	Amino acids and derivatives	氨基酸及其衍生物	Amino acids and derivatives	氨基酸及其衍生物	C20H30N8O9	2	0.8369	-	59799.7	57459.7	20175.2	217162	221086	192963	1.34432	0.00083894	0.0686411	0.217731	-2.19938	down	-	-
MW0144576	Ala-Glu-Val-Asp	Ala-Glu-Val-Asp	Amino acids and derivatives	氨基酸及其衍生物	Amino acids and derivatives	氨基酸及其衍生物	C17H28N4O9	2	0.8303	-	22835.2	41151.6	33221.9	61393.8	100584	36174.1	1.00373	0.208675	0.375001	0.490578	-1.02745	down	-	-
MW0139898	Typhaneoside	香蒲新苷	Flavonoids	黄酮	Flavones	黄酮	C34H42O20	2	0.8192	-	25000.1	20029.7	20746.7	58650.5	48043.3	31730.1	1.28181	0.0853241	0.237637	0.475181	-1.07345	down	-	-
MW0159302	Val-TyrMe-OH	Val-TyrMe-OH	Amino acids and derivatives	氨基酸及其衍生物	Amino acids and derivatives	氨基酸及其衍生物	C20H22N2O7	2	0.8114	-	4316.76	8470.58	7412.29	14094.6	26525.7	8271.78	1.03872	0.213383	0.379372	0.413147	-1.27527	down	-	-
MW0146126	Asp-His-Leu-Asp	Asp-His-Leu-Asp	Amino acids and derivatives	氨基酸及其衍生物	Amino acids and derivatives	氨基酸及其衍生物	C20H30N6O9	2	0.8038	-	61425.8	23035.3	21433.3	43141	99455.6	98238.6	1.05013	0.126744	0.287856	0.439696	-1.18542	down	-	-
MW0151588	Ile-Ser-Val-Asp	Ile-Ser-Val-Asp	Amino acids and derivatives	氨基酸及其衍生物	Amino acids and derivatives	氨基酸及其衍生物	C18H32N4O8	2	0.8029	-	206431	198507	225518	53682.6	84907.7	54450	1.41345	0.000495849	0.0659656	3.26593	1.70749	up	-	-
MW0158703	TyrMe-HoPhe-OH	TyrMe-HoPhe-OH	Amino acids and derivatives	氨基酸及其衍生物	Amino acids and derivatives	氨基酸及其衍生物	C26H26N2O7	2	0.793	-	99907.4	95307.7	92822.9	37740.3	48456.7	18306.6	1.28876	0.0161042	0.124955	2.75625	1.46271	up	-	-
MW0149412	GalNAc1-4[Fuc1-3]GlcNAcSp	GalNAc1-4[Fuc1-3]GlcNAcSp	Others	其它类	Saccharides	糖类	C24H41N5O15	2	0.7801	-	99992.1	107517	113340	45697.2	36344.3	51102.5	1.421	0.000442473	0.0659656	2.40979	1.26891	up	-	-
MW0137547	Caffeic acid phenethyl ester	咖啡酸苯乙酯	Phenolic acids	酚酸类	Phenolic acids	酚酸类	C17H16O4	2	0.7791	-	359.56	916.16	767.95	3087.19	2800.86	1854.01	1.31125	0.0223135	0.141634	0.26397	-1.92156	down	C10484	-
MW0158430	Tyr-Gln-Asn-Glu	Tyr-Gln-Asn-Glu	Amino acids and derivatives	氨基酸及其衍生物	Amino acids and derivatives	氨基酸及其衍生物	C23H32N6O10	2	0.7739	-	39453.8	44411.4	88820.8	184347	193579	142034	1.31319	0.00657873	0.101413	0.332114	-1.59025	down	-	-
MW0103532	Diadenosine triphosphate	三磷酸二腺苷	Nucleotides and derivatives	核苷酸及其衍生物	Nucleotides and derivatives	核苷酸及其衍生物	C20H27N10O16P3	2	0.772	-	59133.1	72262	90195.7	1679.56	1378.97	8249.52	1.37622	0.0121982	0.114817	19.5958	4.29248	up	-	-
MW0144206	Abu-Leu-OH	Abu-Leu-OH	Amino acids and derivatives	氨基酸及其衍生物	Amino acids and derivatives	氨基酸及其衍生物	C15H20N2O6	2	0.7678	-	190871	177437	256558	88358.1	94371.6	84782.6	1.41049	0.0381022	0.167896	2.33584	1.22394	up	-	-
MW0149411	GalNAc1-3Gal1-4LacSp	GalNAc1-3Gal1-4LacSp	Others	其它类	Saccharides	糖类	C28H48N4O21	2	0.7666	-	58042	65634.6	78990.8	23930	23477.9	28901.6	1.42571	0.0149134	0.121614	2.65586	1.40918	up	-	-
MW0134118	5,7-Dihydroxy-2-phenyl-6,8-bis[3,4,5-trihydroxy-6-(hydroxymethyl)oxan-2-yl]chromen-4-one	5，7-二羟基-2-苯基-6，8-双[3，4，5-三羟基-6-(羟甲基）恶烷-2-基]-4H-苯并吡喃-4-酮	Others	其它类	Ketone compounds	酮类化合物	C27H30O14	2	0.7656	-	12211.2	17169.3	14860.6	7088.44	6687.79	8336.55	1.38183	0.0255617	0.147162	2.0007	1.00051	up	-	-
MW0149375	Gal(1-3)[Fuc(1-2)]Gal(1-4)GlcNAcSp	Gal(1-3)[Fuc(1-2)]Gal(1-4)GlcNAcSp	Others	其它类	Saccharides	糖类	C28H48N4O20	2	0.7646	-	15128	23895.6	29225.5	16659.2	1035.95	2117	1.09379	0.0704754	0.217568	3.4448	1.78442	up	-	-
MW0138534	Dactilin	异鼠李素-3-葡萄糖苷-4-葡萄糖苷	Flavonoids	黄酮	Flavones	黄酮	C28H32O17	2	0.7636	-	65877.8	58588.4	60874.4	7540.74	2803.86	10287.9	1.38276	5.73807e-05	0.0489663	8.98296	3.16719	up	-	-
MW0002109	2,3,4-Trihydroxy-4'-ethoxybenzophenone	2,3,4-三羟基-4'-乙氧基苯甲酮	Benzene and substituted derivatives	苯及其衍生物	Benzene and substituted derivatives	苯及其衍生物	C15H14O5	2	0.7593	-	9033.09	10349.6	11428.2	27055.6	34089.7	19163.2	1.35692	0.0586246	0.202395	0.383657	-1.38211	down	-	-
MW0158701	TyrMe-Gly-OH	TyrMe-Gly-OH	Amino acids and derivatives	氨基酸及其衍生物	Amino acids and derivatives	氨基酸及其衍生物	C18H18N2O7	2	0.7586	-	75000.6	46826.7	54939.6	148111	149519	150912	1.40543	0.00798047	0.103511	0.394092	-1.3434	down	-	-
MW0169719	5-(7-Acetyloxy-4-methoxycarbonyl-9-methyl-11-oxo-10-oxatricyclo[6.3.2.01,7]tridec-3-en-9-yl)-2-methylpenta-2,4-dienoic acid	5-(7-Acetyloxy-4-methoxycarbonyl-9-methyl-11-oxo-10-oxatricyclo[6.3.2.01,7]tridec-3-en-9-yl)-2-methylpenta-2,4-dienoic acid	Organic acids	有机酸	Organic acids	有机酸	C23H28O8	2	0.7535	-	114487	183878	189204	32715.2	82060.8	47987.6	1.28182	0.0262105	0.148262	2.99557	1.58283	up	-	-
MW0150151	Glu-Ser-Tyr-Asp	谷氨酸-丝氨酸-酪氨酸-天门冬氨酸	Amino acids and derivatives	氨基酸及其衍生物	Amino acids and derivatives	氨基酸及其衍生物	C21H28N4O11	2	0.7525	-	44112.2	45971.8	47101.9	8353.6	10148.8	34932.6	1.1478	0.0813418	0.232979	2.56734	1.36027	up	-	-
MW0144642	Ala-Leu-Phe-Glu	Ala-Leu-Phe-Glu	Amino acids and derivatives	氨基酸及其衍生物	Amino acids and derivatives	氨基酸及其衍生物	C23H34N4O7	2	0.746	-	241564	358570	353176	83882.3	109432	35278.7	1.32066	0.0101483	0.111886	4.17034	2.06017	up	-	-
MW0146334	Aspartylasparagine	Asp Asn	Amino acids and derivatives	氨基酸及其衍生物	Amino acids and derivatives	氨基酸及其衍生物	C8H13N3O6	2	0.7456	-	576307	248280	295029	125023	147504	269536	1.03209	0.192266	0.357847	2.06547	1.04647	up	-	-
MW0155341	Phe-Ser-Tyr-Asp	Phe-Ser-Tyr-Asp	Amino acids and derivatives	氨基酸及其衍生物	Amino acids and derivatives	氨基酸及其衍生物	C25H30N4O9	2	0.7413	-	79080.7	24355.6	34925.9	241861	207311	162137	1.33018	0.00681885	0.101929	0.226338	-2.14345	down	-	-
MW0155072	Phe-Ala-Asn-Lys	Phe-Ala-Asn-Lys	Amino acids and derivatives	氨基酸及其衍生物	Amino acids and derivatives	氨基酸及其衍生物	C22H34N6O6	2	0.7387	-	279689	445140	447654	71855.1	85201.1	76471.4	1.43293	0.0295898	0.153711	5.02075	2.3279	up	-	-
MW0157891	Threoninyl-Isoleucine	苏氨酰-异亮氨酸	Amino acids and derivatives	氨基酸及其衍生物	Amino acids and derivatives	氨基酸及其衍生物	C10H20N2O4	2	0.737	-	27599.4	31555.3	31377.7	22405.3	11570.6	9277.05	1.22624	0.0492029	0.186065	2.09309	1.06564	up	-	-
MEDP1046	TRIPHENYL PHOSPHATE	磷酸三苯酯	Others	其它类	Lactones	内酯类化合物	C18H15O4P	2	0.7366	-	1.23791e+06	706376	868048	76702.1	117846	372826	1.26943	0.0226644	0.142497	4.95675	2.3094	up	C14235	-
MW0158705	TyrMe-Leu-OH	TyrMe-Leu-OH	Amino acids and derivatives	氨基酸及其衍生物	Amino acids and derivatives	氨基酸及其衍生物	C22H26N2O7	2	0.7351	-	2.86799e+06	3.69721e+06	3.70058e+06	1.34626e+06	1.35316e+06	1.23804e+06	1.43837	0.0154713	0.123259	2.60721	1.38251	up	-	-
MW0157032	Ser-TyrMe-OH	Ser-TyrMe-OH	Amino acids and derivatives	氨基酸及其衍生物	Amino acids and derivatives	氨基酸及其衍生物	C19H20N2O8	2	0.7349	-	9653.15	37411.9	36153.8	156206	153011	81535.1	1.24494	0.0391586	0.169513	0.21297	-2.23127	down	-	-
MW0157912	Thr-Thr	苏氨酰苏氨酸	Amino acids and derivatives	氨基酸及其衍生物	Amino acids and derivatives	氨基酸及其衍生物	C8H16N2O5	2	0.7339	-	352145	293170	336977	62730.7	60459	54052.6	1.45504	0.00369135	0.0892077	5.54208	2.47043	up	-	-
MW0107847	Leu-Thr	L-亮氨酸-L-苏氨酸	Amino acids and derivatives	氨基酸及其衍生物	Amino acids and derivatives	氨基酸及其衍生物	C10H20N2O4	2	0.7307	-	15736.8	32698.8	25708.3	5261.91	7232.23	11482.8	1.27908	0.0625517	0.207923	3.0923	1.62868	up	-	-
MW0011470	9-nitro-9E-octadecenoic acid	（9E)-9-硝基十八烯酸	Lipids	脂质	Free fatty acids	游离脂肪酸	C18H33NO4	2	0.7267	-	7608.19	28696.3	32241.3	5171.14	4228.26	4223.77	1.23675	0.13998	0.303156	5.03156	2.331	up	-	-
MW0153739	Met-Abu-OH	Met-Abu-OH	Amino acids and derivatives	氨基酸及其衍生物	Amino acids and derivatives	氨基酸及其衍生物	C14H18N2O6S	2	0.7264	-	361914	537196	467941	1.01585e+06	1.26619e+06	628683	1.21707	0.100018	0.255057	0.469659	-1.09031	down	-	-
MW0144217	Abu-Val-OH	Abu-Val-OH	Amino acids and derivatives	氨基酸及其衍生物	Amino acids and derivatives	氨基酸及其衍生物	C14H18N2O6	2	0.723	-	204109	333046	337692	118634	120787	91945.7	1.36597	0.0483519	0.184667	2.64011	1.4006	up	-	-
MW0158307	Trp-Nap-OH	Trp-Nap-OH	Amino acids and derivatives	氨基酸及其衍生物	Amino acids and derivatives	氨基酸及其衍生物	C30H25N3O6	2	0.7155	-	1.07005e+06	1.8048e+06	1.5537e+06	130963	181789	292303	1.4059	0.0231079	0.143893	7.31925	2.8717	up	-	-
MW0137869	Daphnoretin	西瑞香素	Lignans and Coumarins	木脂素和香豆素	Coumarins	香豆素	C19H12O7	2	0.712	-	16756.3	9539.45	10380.8	49619.6	49814.8	50025.2	1.4221	0.00357989	0.0878872	0.245394	-2.02683	down	C09216	-
MW0146074	Asp-Gln-Ala-Asp	Asp-Gln-Ala-Asp	Amino acids and derivatives	氨基酸及其衍生物	Amino acids and derivatives	氨基酸及其衍生物	C16H25N5O10	2	0.7055	-	3172.81	33009.8	15054.3	126104	126817	94860.2	1.24004	0.00221345	0.0811752	0.147325	-2.76293	down	-	-
MW0110412	Val-Met	缬氨酰蛋氨酸	Amino acids and derivatives	氨基酸及其衍生物	Amino acids and derivatives	氨基酸及其衍生物	C10H20N2O3S	2	0.7033	-	3715.48	15181.9	11788.8	4779.55	4003.79	2295.89	1.00953	0.190172	0.356335	2.7697	1.46973	up	-	-
MW0158704	TyrMe-Ile-OH	TyrMe-Ile-OH	Amino acids and derivatives	氨基酸及其衍生物	Amino acids and derivatives	氨基酸及其衍生物	C22H26N2O7	2	0.7008	-	41210	90238.6	97728.7	239547	231919	216360	1.30926	0.00678972	0.101929	0.333191	-1.58558	down	-	-
MW0158912	Val-Asn-Asp-Lys	Val-Asn-Asp-Lys	Amino acids and derivatives	氨基酸及其衍生物	Amino acids and derivatives	氨基酸及其衍生物	C19H34N6O8	3	0.9902	-	14523.6	20809.7	21112.9	3042.42	4448.68	860.84	1.31767	0.00753987	0.10294	6.75845	2.75669	up	-	-
MW0168178	3-Hydroxy-9,10-secoandrosta-1,3,5(10)-triene-9,17-dione	3-Hydroxy-9,10-secoandrosta-1,3,5(10)-triene-9,17-dione	Phenolic acids	酚酸类	Phenolic acids	酚酸类	C19H24O3	3	0.9671	-	20877.7	23908	18677	163156	123142	74593.1	1.402	0.060211	0.204673	0.17585	-2.50759	down	C19944	ko01100
MEDP2273	2-(2-Propynyloxy)-benzenehexanoic acid	PPOH	Benzene and substituted derivatives	苯及其衍生物	Benzene and substituted derivatives	苯及其衍生物	C15H18O3	3	0.9194	-	30718.1	38828	39331.7	15056.8	17347.6	13984.3	1.42294	0.0104906	0.112223	2.34707	1.23086	up	-	-
ZINC49888990	epicalyxin I	副萼毒素I	Heterocyclic compounds	杂环化合物	Heterocyclic compounds	杂环化合物	C42H38O9	3	0.9193	-	9358.05	10374	6144.07	24819.9	17840.2	15938.6	1.30481	0.0385573	0.168779	0.441582	-1.17925	down	-	-
pmn001517	3,4,5-Trimethoxyphenyl-1-O-Glucoside	3,4,5-三甲氧基苯基-1-O-葡萄糖苷	Phenolic acids	酚酸类	Phenolic acids	酚酸类	C15H22O8	3	0.9162	-	11178.1	6241.34	1233.12	21351.8	20379.4	11275.4	1.03229	0.0571406	0.200402	0.351892	-1.50679	down	-	-
MW0153191	Lys-Tyr-Val-Met-Leu	Lys-Tyr-Val-Met-Leu	Amino acids and derivatives	氨基酸及其衍生物	Amino acids and derivatives	氨基酸及其衍生物	C31H52N6O7S	3	0.9028	-	145344	130568	119437	30087.3	52247.4	69469.9	1.2977	0.00627151	0.101413	2.60432	1.38091	up	-	-
MW0165072	10(R),17(R)-dihydroxydocosa-4Z,7Z,11E,13E,15Z,19Z-hexaenoic acid	10(R),17(R)-dihydroxydocosa-4Z,7Z,11E,13E,15Z,19Z-hexaenoic acid	Lipids	脂质	Free fatty acids	游离脂肪酸	C22H32O4	3	0.8923	-	1831.22	92.29	366.68	5866.29	7881.04	21188.1	1.26612	0.150263	0.314205	0.0655549	-3.93115	down	-	-
MW0131213	3-(3,7-dimethylocta-2,6-dien-1-yl)-5,7-dihydroxy-6-(3-methylbut-2-en-1-yl)-2-(2,4,5-trihydroxyphenyl)-3,4-dihydro-2H-1-benzopyran-4-one	6-{4-[3-(3，7-二甲基辛-2，6-二烯-1-基)-5，7-二羟基-6-(3-甲基丁-2-烯-1-基)-4-氧代-4H-苯并吡喃-2-基]-3-羟基苯氧基}-3，4，5-三羟基恶烷-2-羧酸	Others	其它类	Others	其它	C30H36O7	3	0.8884	-	678029	644715	592099	125027	141009	502852	1.13484	0.0849305	0.237481	2.49041	1.31638	up	-	-
MW0011825	1-(sn-Glycero-3-phospho)-1D-myo-inositol	1-(sn-甘油-3-磷酸)-1D-肌醇	Others	其它类	Saccharides	糖类	C9H19O11P	3	0.8877	-	2.10673e+06	1.68912e+06	1.72777e+06	6.32781e+06	6.13436e+06	6.25534e+06	1.45191	0.000169703	0.0656186	0.295105	-1.7607	down	C01225	-
MW0129217	{3-[8-(5,7-dihydroxy-4-oxo-2-phenyl-3,4-dihydro-2H-1-benzopyran-3-yl)-5,7-dihydroxy-4-oxo-3,4-dihydro-2H-1-benzopyran-2-yl]phenyl}oxidanesulfonic acid	{3-[8-(5，7-二羟基-4-氧代-2-苯基-3，4-二氢-2H-1-苯并吡喃-3-基)-5，7-二羟基-4-氧代-3，4-二氢-2H-1-苯并吡喃-2-基]苯基}氧代磺酸	Organic acids	有机酸	Organic acids	有机酸	C30H22O12S	3	0.8741	-	78092.5	104144	113073	688.21	15752.7	32364.5	1.07392	0.00436792	0.0945682	6.05075	2.59711	up	-	-
MEDN1284	LPE(18:3/0:0)	LPE(18:3/0:0)	GP	甘油磷脂类	LPE	溶血磷脂酰乙醇胺	C23H42NO7P	3	0.8479	-	216852	246876	281761	56195.4	35977.3	127720	1.27393	0.00916408	0.107897	3.39024	1.76139	up	-	-
MW0135106	6,11-dihydroxy-2,2,5-trimethyl-12-(6,8,11-trihydroxy-2,2,5-trimethyl-10-oxo-3,4,5,10-tetrahydro-2H-1-oxa-5-azatetraphen-4-yl)-5,10-dihydro-2H-1-oxa-5-azatetraphen-10-one	6,11-二羟基-2,2,5-三甲基-12-(6,8,11-三羟基-2,2,5-三甲基-10-氧代-3,4,5,10-四氢-2H-1-氧杂-5-氮杂四酚-4-基)-5,10-二氢-2H-1-氧杂-5-氮杂四酚-10-酮	Others	其它类	Ketone compounds	酮类化合物	C38H34N2O9	3	0.8441	-	43035.1	94791.3	50830.7	305067	343701	94320.1	1.1671	0.134596	0.295844	0.253882	-1.97777	down	-	-
MW0134151	5,7-dihydroxy-3-[3-hydroxy-4-methoxy-5-(3-methylbut-2-en-1-yl)phenyl]-8-(3-methylbut-2-en-1-yl)-4H-chromen-4-one	5，7-二羟基-3-[3-羟基-4-甲氧基-5-(3-甲基丁-2-烯-1-基）苯基]-8-(3-甲基丁-2-烯-1-基)-4H-苯并吡喃-4-酮	Others	其它类	Ketone compounds	酮类化合物	C26H28O6	3	0.8417	-	114718	154826	151517	62010.7	62062	43300	1.39132	0.0106543	0.112223	2.51571	1.33096	up	-	-
MEDN1221	Mannose 6-phosphate	D-甘露糖-6-磷酸	Others	其它类	Saccharides	糖类	C6H13O9P	3	0.8324	-	170558	119369	104737	276821	270384	288535	1.37195	0.0132763	0.116076	0.472233	-1.08243	down	C00275	ko00051,ko00520,ko01100,ko01110,ko01240,ko01250
MW0109130	Phe-Pro-Lys	苯丙氨酰-脯氨酰-赖氨酸	Amino acids and derivatives	氨基酸及其衍生物	Amino acids and derivatives	氨基酸及其衍生物	C20H30N4O4	3	0.8255	-	208406	404113	345938	112380	79167.3	145206	1.3037	0.058446	0.202273	2.84617	1.50902	up	-	-
MW0110216	Tyr-Pro-Lys	酪氨酸-脯氨酸-赖氨酸	Amino acids and derivatives	氨基酸及其衍生物	Amino acids and derivatives	氨基酸及其衍生物	C20H30N4O5	3	0.817	-	331652	518365	345912	199585	182440	192198	1.35339	0.073601	0.222489	2.08269	1.05845	up	-	-
MW0127739	({8-[2-(2,4-dihydroxyphenyl)-7-hydroxy-8-(3-methylbut-2-en-1-yl)-4-oxo-4H-chromen-3-yl]-2,6-dimethylocta-2,6-dien-4-yl}oxy)sulfonic acid	6-{4-[3-(3，7-二甲基辛-2，6-二烯-1-基)-8-[（3，3-二甲基环氧乙烷-2-基）甲基]-7-羟基-4-氧代-4H-苯并吡喃-2-基]-3-羟基苯氧基}-3，4，5-三羟基恶烷-2-羧酸	Others	其它类	Others	其它	C30H34O9S	3	0.8035	-	58222.5	17811.4	28199	12738	5740.88	18740.3	1.04623	0.199769	0.364957	2.80052	1.48569	up	-	-
MEDN1262	LPS(18:2/0:0)	LPS(18:2/0:0)	GP	甘油磷脂类	LPS	溶血磷脂酰丝氨酸	C24H44NO9P	3	0.7987	-	14917.7	26649.4	21478.9	4280.41	149.28	32.07	1.21897	0.0175156	0.129828	14.1303	3.82072	up	-	-
MEDL02054	3-Pyridinemethanol	3-吡啶甲醇	Alcohol and amines	醇、胺类	Alcohols	醇类	C6H7NO	3	0.7984	-	349899	539194	613759	130996	118394	123143	1.42101	0.0405397	0.172347	4.03415	2.01226	up	-	-
MW0003451	3-(3,4-dimethoxyphenyl)-N-[2-(3,4-dimethoxyphenyl)ethyl]-3-(sulfooxy)propanimidic acid	3-(3,4-二甲氧基苯基)-N-[2-(3,4-二甲氧基苯基）乙基]-3-(磺氧基）丙二酸	Benzene and substituted derivatives	苯及其衍生物	Benzene and substituted derivatives	苯及其衍生物	C21H27NO9S	3	0.7903	-	98469.8	75433.7	65662.7	223281	202027	199218	1.41835	0.000645141	0.0671529	0.383596	-1.38234	down	-	-
MW0156558	schisandrin C	五味子丙素	Lignans and Coumarins	木脂素和香豆素	Lignans	木脂素	C22H24O6	3	0.7877	-	33255.2	52102.8	37684.9	14521.5	14765.3	15954.5	1.40675	0.0441639	0.180086	2.7197	1.44345	up	-	-
MW0003766	3-(3-Methoxy-4-sulooxyphenyl)-2-oxopropanoic acid	3-[3-甲氧基-4-(磺氧基）苯基]-2-氧代丙酸	Benzene and substituted derivatives	苯及其衍生物	Benzene and substituted derivatives	苯及其衍生物	C10H10O8S	3	0.7858	-	4433.41	12460.6	4133.36	204.53	1361.69	1695.78	1.16613	0.158794	0.323585	6.44616	2.68844	up	-	-
MW0137135	8,16-Dihydroxy-6-(6-hydroxy-1-benzouran-2-yl)-12-methyl-3,13-dioxapentacyclo[10.7.1.02,10.04,9.014,19]icosa-2(10),4,6,8,14(19),15,17-heptaen-11-one	8,16-二羟基二十碳四烯酸	Lipids	脂质	Free fatty acids	游离脂肪酸	C27H18O7	3	0.7816	-	559715	412863	383815	923190	882953	1.22887e+06	1.37025	0.0204138	0.138234	0.446916	-1.16193	down	-	-
MW0130125	2-(3,4-Dihydroxyphenyl)-3,5,7-trihydroxy-6-methoxy-2,3-dihydrochromen-4-one	2-(3，4-二羟基苯基)-3，5，7-三羟基-6-甲氧基-3，4-二氢-2H-1-苯并吡喃-4-酮	Benzene and substituted derivatives	苯及其衍生物	Benzene and substituted derivatives	苯及其衍生物	C16H14O8	3	0.7798	-	54391.3	34455.8	42895.7	1382.05	1126.94	12436	1.26747	0.00758962	0.10294	8.81522	3.14	up	-	-
MW0131004	3-(2,4-dihydroxyphenyl)-7,8-dihydroxy-3,4-dihydro-2H-1-benzopyran-4-one	3-(2，4-二羟基苯基)-7，8-二羟基-3，4-二氢-2H-1-苯并吡喃-4-酮	Benzene and substituted derivatives	苯及其衍生物	Benzene and substituted derivatives	苯及其衍生物	C15H12O6	3	0.7793	-	1.06831e+06	1.99874e+06	1.25645e+06	280226	436280	1.04898e+06	1.10579	0.0839705	0.236709	2.44889	1.29213	up	-	-
MW0107702	Leu-Ala-Lys	L-亮氨酸-L-丙氨酸-L-赖氨酸	Amino acids and derivatives	氨基酸及其衍生物	Amino acids and derivatives	氨基酸及其衍生物	C15H30N4O4	3	0.7774	-	3788.53	14498.6	12695.7	108299	83955	28517.2	1.24128	0.11288	0.272226	0.140339	-2.83301	down	-	-
MW0109332	Pro-Phe-Lys	脯氨酰-苯丙氨酰-赖氨酸	Amino acids and derivatives	氨基酸及其衍生物	Amino acids and derivatives	氨基酸及其衍生物	C20H30N4O4	3	0.775	-	187957	67993.4	66037.7	323938	252363	240014	1.21578	0.0338078	0.159744	0.394441	-1.34212	down	-	-
ZINC38321735	[(11S,12S,13S)-12-hydroxy-3,22-dimethoxy-12,13-dimethyl-5,7,18,20-tetraoxapentacyclo[13.7.0.02,10.04,8.017,21]docosa-1(22),2,4(8),9,15,17(21)-hexaen-11-yl] 3-methylbut-2-enoate	[（11S，12S，13S)-12-羟基-3，22-二甲氧基-12，13-二甲基-5，7，18，20-四氧杂戊环[13.7.0.02，10.04，8.017，21]二十二烷-1（22）2，4（8）9，15，17（21)-己烯-11-基]3-甲基-2-丁烯酸酯	Others	其它类	Lactones	内酯类化合物	C27H30O9	3	0.7743	-	13176.5	14336.8	9927.72	629.12	5263.96	6387.6	1.01799	0.0217894	0.140802	3.04878	1.60823	up	-	-
MW0128213	(4-{8-[3,7-dihydroxy-2-(3-hydroxyphenyl)-3,4-dihydro-2H-1-benzopyran-4-yl]-3,5,7-trihydroxy-2-(3-hydroxyphenyl)-3,4-dihydro-2H-1-benzopyran-6-yl}-7-hydroxy-2-(3-hydroxyphenyl)-3,4-dihydro-2H-1-benzopyran-3-yl)oxidanesulfonic acid	（4-{8-[3，7-二羟基-2-(3-羟基苯基)-3，4-二氢-2H-1-苯并吡喃-4-基]-3，5，7-三羟基-2-(3-羟基苯基)-3，4-二氢-2H-1-苯并吡喃-6-基}-7-羟基-2-	Organic acids	有机酸	Organic acids	有机酸	C45H38O16S	3	0.77	-	2.89219e+06	2.04576e+06	2.49895e+06	580355	811426	1.35161e+06	1.29526	0.00959309	0.109708	2.71085	1.43874	up	-	-
MEDN0573	GDP-L-fucose	GDP-L-岩藻糖	Nucleotides and derivatives	核苷酸及其衍生物	Nucleotides and derivatives	核苷酸及其衍生物	C16H25N5O15P2	3	0.7644	-	21945.5	26283.3	35147.5	1466.35	1939.36	1400.12	1.45125	0.0211347	0.139657	17.349	4.11678	up	-	-
MW0134150	5,7-dihydroxy-3-[3-hydroxy-4-methoxy-5-(3-methylbut-2-en-1-yl)phenyl]-8-(3-methylbut-2-en-1-yl)-3,4-dihydro-2H-1-benzopyran-4-one	5，7-二羟基-3-[3-羟基-4-甲氧基-5-(3-甲基丁-2-烯-1-基）苯基]-8-(3-甲基丁-2-烯-1-基)-3，4-二氢-2H-1-苯并吡喃-4-酮	Benzene and substituted derivatives	苯及其衍生物	Benzene and substituted derivatives	苯及其衍生物	C26H30O6	3	0.7627	-	18384.2	17953.8	8214.58	38100.8	38793.3	34888	1.2919	0.0131399	0.115688	0.398566	-1.32711	down	-	-
MW0134824	6-(2,4-dihydroxyphenyl)-2-{3-[3-(2,4-dihydroxyphenyl)propanoyl]-2,6-dihydroxyphenyl}-4-methylcyclohex-3-ene-1-carboxylic acid	6-(2，4-二羟基苯基)-2-{3-[3-(2，4-二羟基苯基）丙酰基]-2，6-二羟基苯基}-4-甲基环己-3-烯-1-羧酸	Organic acids	有机酸	Organic acids	有机酸	C29H28O9	3	0.7616	-	93036	88165.7	75990.3	390146	399658	218610	1.39375	0.0500444	0.187565	0.255046	-1.97117	down	-	-
MEDP0797	1-Hydroxyanthraquinone	1-羟基蒽醌	Quinones	醌类	Anthraquinone	蒽醌	C14H8O3	3	0.7575	-	40426.1	47585.2	50125	17868.4	16982.6	30895.7	1.29396	0.0153309	0.123259	2.10104	1.0711	up	C02980	-
MW0130119	2-(3,4-dihydroxyphenyl)-3,4-dihydro-2H-1-benzopyran-3,5,6,7-tetrol	2-(3，4-二羟基苯基)-3，4-二氢-2H-1-苯并吡喃-3，5，6，7-四醇	Benzene and substituted derivatives	苯及其衍生物	Benzene and substituted derivatives	苯及其衍生物	C15H14O7	3	0.7538	-	531076	596645	573928	160210	318589	294436	1.28485	0.0147126	0.120825	2.20069	1.13795	up	-	-
MW0130610	2-{2,6-dihydroxy-4-[6-hydroxy-7-(3-methylbut-2-en-1-yl)-1-benzofuran-2-yl]phenyl}-4-(2,4-dihydroxyphenyl)-6-methyl-7-oxabicyclo[4.1.0]heptane-3-carboxylic acid	2-{2，6-二羟基-4-[6-羟基-7-(3-甲基丁-2-烯-1-基)-1-苯并呋喃-2-基]苯基}-4-(2，4-二羟基苯基)-6-甲基-7-氧杂二环[4.1.0]庚烷-3-羧酸	Organic acids	有机酸	Organic acids	有机酸	C33H32O9	3	0.7511	-	8841.23	11728.8	10974.7	13103.1	47317.3	32614.1	1.13714	0.173585	0.338133	0.339065	-1.56037	down	-	-
MW0135340	6-[1-(2H-1,3-benzodioxol-5-yl)-3-(4-hydroxy-1-benzofuran-5-yl)-1,3-dioxopropan-2-yl]-3,4,5-trihydroxyoxane-2-carboxylic acid	6-[1-(2H-1，3-苯并间二氧杂环戊烯-5-基)-3-(4-羟基-1-苯并呋喃-5-基)-1，3-二氧代丙-2-基]-3，4，5-三羟基恶烷-2-羧酸	Organic acids	有机酸	Organic acids	有机酸	C24H20O12	3	0.7489	-	11138.9	33895.8	23108.4	77428.6	98042.2	30877.5	1.08833	0.135638	0.296868	0.330234	-1.59844	down	-	-
MW0134272	1-(3,4,5-Trihydroxyphenyl)-3-(2,4,6-trihydroxyphenyl)-2-propanol	5-[2-羟基-3-(2,4,6-三羟基苯基）丙基]苯-1,2,3-三醇	Benzene and substituted derivatives	苯及其衍生物	Benzene and substituted derivatives	苯及其衍生物	C15H16O7	3	0.7473	-	61828.3	58090.4	53517.8	20701	24818.8	31437.2	1.38823	0.00161167	0.0787176	2.25368	1.17228	up	-	-
MW0129185	{3-[(E)-2-{3,5-dihydroxy-4-[(1E)-3-methylbut-1-en-1-yl]phenyl}ethenyl]-2,6-dihydroxyphenyl}oxidanesulfonic acid	{3-[（E)-2-{3，5-二羟基-4-[（1E)-3-甲基丁-1-烯-1-基]苯基}乙烯基]-2，6-二羟基苯基}氧代磺酸	Organic acids	有机酸	Organic acids	有机酸	C19H20O8S	3	0.7443	-	71781.1	43094.2	38521.8	34017.8	15933.5	14230.7	1.17777	0.0846073	0.237481	2.39003	1.25703	up	-	-
MEDL00411	LysoPA(18:2(9Z,12Z)/0:0)	1-亚油酸甘油3-磷酸	GP	甘油磷脂类	LPA	溶血磷脂酸	C21H39O7P	3	0.7419	-	313111	385268	303725	31124.1	77212.7	119977	1.29858	0.00208465	0.0811752	4.38915	2.13394	up	-	-
MW0129991	2-(2,4-dihydroxy-5-methoxyphenyl)-5-hydroxy-8,8-dimethyl-4H,8H-pyrano[3,2-g]chromen-4-one	2-(2,4-二羟基-5-甲氧基苯基)-5-羟基-8,8-二甲基-4H，8H-吡喃并[3,2-g] chromen-4-one	Others	其它类	Ketone compounds	酮类化合物	C21H18O7	3	0.7387	-	45865.6	36621.1	29384.8	99804.6	95463.8	42053.9	1.09297	0.146	0.309732	0.471391	-1.085	down	-	-
MW0062298	(2S)-2-amino-3-[hydroxy-[(2R)-2-[(Z)-octadec-11-enoyl]oxy-3-tetradecanoyloxypropoxy]phosphoryl]oxypropanoic acid	PS(14:0/18:1(11Z))	GP	甘油磷脂类	PS	磷脂酰丝氨酸	C38H72NO10P	3	0.7371	-	2978.07	525.73	3037.51	6688.3	6952.4	4768.27	1.06819	0.0225405	0.142497	0.355333	-1.49276	down	-	-
MW0159411	Xanthosine 5'-(trihydrogen diphosphate)	黄嘌呤5'-焦磷酸	Nucleotides and derivatives	核苷酸及其衍生物	Nucleotides and derivatives	核苷酸及其衍生物	C10H14N4O12P2	3	0.7364	-	62269.1	11823	78106.5	211230	149547	169259	1.13663	0.00978842	0.109972	0.287148	-1.80014	down	C01337	ko01232
MW0003445	3-(3,4-dimethoxyphenyl)-N-[2-(3,4-dimethoxyphenyl)-2-(sulfooxy)ethyl]prop-2-enimidic acid	6-[6-(2-{[2-(3,4-二甲氧基苯基）乙基]-C-羟基碳酰胺基}乙基-1-烯-1-基)-2,3-二甲氧基苯氧基]-3,4,5-三羟基氧烷-2-羧酸	Organic acids	有机酸	Organic acids	有机酸	C21H25NO9S	3	0.7343	-	180381	141784	136813	486368	472374	292343	1.36518	0.0459958	0.181137	0.366864	-1.44668	down	-	-
MW0134157	Assamene	5，7-二羟基-4-(1-羟丙基)-6-(3-甲基丁-2-烯-1-基)-8-(2-甲基丁酰基)-2H-苯并吡喃-2-酮	Others	其它类	Ketone compounds	酮类化合物	C22H28O6	3	0.7326	-	21488.7	7506.7	3635.88	36005.5	22377.2	28980.1	1.1141	0.0583614	0.202273	0.373515	-1.42076	down	-	-
MW0132850	CID 75111068	3-[（3,4-二羟基-6-甲基-5-{[3,4,5-三羟基-6-(羟甲基）氧代-2-基]氧基]-2-(3,4-二羟苯基)-5-羟基-7-{[3,4,5-三羟基-6-(羟甲基）氧代-2-基]氧基]-4H-铬-4-酮	Others	其它类	Ketone compounds	酮类化合物	C33H40O21	3	0.7318	-	338450	79225	59895.1	451130	481379	415848	1.1515	0.0780314	0.228718	0.354187	-1.49742	down	-	-
MW0132957	3-{[3,4-dihydroxy-5-(hydroxymethyl)oxolan-2-yl]oxy}-5,7-dihydroxy-2-(3-hydroxyphenyl)-4H-chromen-4-one	3-{[3，4-二羟基-5-(羟甲基）氧杂环戊烷-2-基]氧}-5，7-二羟基-2-(3-羟基苯基)-4H-苯并吡喃-4-酮	Others	其它类	Ketone compounds	酮类化合物	C20H18O10	3	0.7315	-	96295.6	183722	120989	15933.9	2207.2	16660.5	1.30463	0.0388532	0.169276	11.5227	3.5264	up	-	-
MW0135343	6-[1-(3,4-dihydroxyphenyl)-3-(4-methoxy-1-benzofuran-5-yl)-1,3-dioxopropan-2-yl]-3,4,5-trihydroxyoxane-2-carboxylic acid	6-[1-(3，4-二羟基苯基)-3-(4-甲氧基-1-苯并呋喃-5-基)-1，3-二氧代丙-2-基]-3，4，5-三羟基恶烷-2-羧酸	Organic acids	有机酸	Organic acids	有机酸	C24H22O12	3	0.7309	-	16280	21934.5	25022.3	5519.16	7052.65	4918.92	1.41738	0.021788	0.140802	3.61544	1.85417	up	-	-
MW0157934	Tiliacorine	替利考林	Lignans and Coumarins	木脂素和香豆素	Lignans	木脂素	C36H36N2O5	3	0.7303	-	130698	125960	142018	61473.8	50814.4	65440.9	1.43103	0.000352334	0.0659656	2.24316	1.16554	up	C09667	-
MW0128767	[4-(5-Hydroxy-7-methoxy-8-methyl-4-oxochromen-3-yl)-2-methoxyphenyl] hydrogen sulate	[4-(5-羟基-7-甲氧基-8-甲基-4-氧代-4H-苯并吡喃-3-基)-2-甲氧基苯基]氧代磺酸	Organic acids	有机酸	Organic acids	有机酸	C18H16O9S	3	0.7301	-	57680.3	74220.2	75848.4	8193.09	2837.57	5723.71	1.41977	0.00546132	0.099615	12.3997	3.63223	up	-	-
MW0133402	4,6-dihydroxy-2-(hydroxymethyl)-5-(3,4,5-trihydroxybenzoyloxy)oxan-3-yl 3,4,5-trihydroxybenzoate	4，6-二羟基-2-(羟甲基)-5-(3，4，5-三羟基苯甲酰氧基）恶烷-3-基3，4，5-三羟基苯甲酸酯	Benzene and substituted derivatives	苯及其衍生物	Benzene and substituted derivatives	苯及其衍生物	C20H20O14	3	0.7292	-	88300.4	95161.3	69991	14481.2	9106.43	28352.1	1.34892	0.00265919	0.0850936	4.87974	2.28681	up	-	-
MW0014318	Ncgc00384888-01_C21H32O9_	ncgc00384888-01_C21H32O9_	Benzene and substituted derivatives	苯及其衍生物	Benzene and substituted derivatives	苯及其衍生物	C21H32O9	3	0.729	-	234.53	1513.68	866.65	18790.1	29171.8	8538.5	1.34449	0.0940551	0.247401	0.0462804	-4.43346	down	-	-
MW0112403	3,4,5-Trihydroxy-6-[(1-oxoisochromen-3-yl)methoxy]oxane-2-carboxylic acid	3，4，5-三羟基-6-[（1-氧代-1H-异色烯-3-基）甲氧基]恶烷-2-羧酸	Organic acids	有机酸	Organic acids	有机酸	C16H16O9	3	0.7289	-	720215	988879	1.22321e+06	2.01405e+06	3.74832e+06	5.77015e+06	1.29381	0.115938	0.275068	0.254264	-1.9756	down	-	-
MW0002326	[2,5-Dihydroxy-6-(hydroxymethyl)-3-(3,4,5-trihydroxybenzoyl)oxyoxan-4-yl] 3,4,5-trihydroxybenzoate	2,5-二羟基-6-(羟甲基)-3-(3,4,5-三羟基苯甲酰氧基）氧代-4-基3,4,5-三羟基苯甲酸酯	Benzene and substituted derivatives	苯及其衍生物	Benzene and substituted derivatives	苯及其衍生物	C20H20O14	3	0.7281	-	301769	470104	1.19446e+06	141253	76048	317935	1.09843	0.218791	0.385125	3.67377	1.87726	up	-	-
MW0128504	[(6-hydroxy-1-oxo-1H-isochromen-3-yl)methoxy]sulfonic acid	[（6-羟基-1-氧代-1H-异色烯-3-基）甲氧基]磺酸	Organic acids	有机酸	Organic acids	有机酸	C10H8O7S	3	0.7233	-	18127.8	35936.1	34516.9	4237.67	1974.26	3380.35	1.40895	0.0424005	0.175409	9.2346	3.20705	up	-	-
MW0111897	2-(4-Benzoyl-3,5-dihydroxyphenoxy)-6-(hydroxymethyl)oxane-3,4,5-triol	2-(4-苯甲酰-3,5-二羟基苯氧基)-6-(羟甲基）氧烷-3,4,5-三醇	Benzene and substituted derivatives	苯及其衍生物	Benzene and substituted derivatives	苯及其衍生物	C19H20O9	3	0.7214	-	1.45245e+06	1.15966e+06	1.0812e+06	442116	457456	609530	1.39117	0.0115699	0.112902	2.44735	1.29122	up	-	-
MW0166369	cytosyl-beta-D-glucuronate	胞嘧啶-β-D-葡萄糖醛酸	Organic acids	有机酸	Organic acids	有机酸	C10H12N3O7-	3	0.7212	-	653.41	1347.3	2396.79	11283.6	9762.36	6721.05	1.33785	0.0182452	0.132071	0.158371	-2.65862	down	-	-
ZINC85492333	[(1S,2S,3R,4S,7R,9S,10S,11S,12R,15S)-4,9,11,15-tetraacetyloxy-1,12-dihydroxy-10,14,17,17-tetramethyl-6-oxatetracyclo[11.3.1.03,10.04,7]heptadec-13-en-2-yl] benzoate	[(1S,2S,3R,4S,7R,9S,10S,11S,12R,15S)-4,9,11,15-tetraacetyloxy-1,12-dihydroxy-10,14,17,17-tetramethyl-6-oxatetracyclo[11.3.1.03,10.04,7]heptadec-13-en-2-yl] benzoate	Benzene and substituted derivatives	苯及其衍生物	Benzene and substituted derivatives	苯及其衍生物	C35H44O13	3	0.7208	-	223956	175398	257178	45973.2	52928.3	50423.8	1.44156	0.0185577	0.132677	4.39666	2.13641	up	-	-
MW0121577	N-(2-(Methylamino)ethyl)-5-isoquinolinesulfonamide	N-(2-(甲基氨基)乙基)-5-异喹啉磺酰胺	Alcohol and amines	醇、胺类	Amines	胺类	C12H15N3O2S	3	0.7196	-	2503.44	4928.27	4316.85	1548.05	711.94	1515.34	1.27498	0.0534341	0.193548	3.11193	1.63781	up	-	-
MW0105120	3-Oxododecanoic acid	3-氧十二烷酸	Organic acids	有机酸	Organic acids	有机酸	C12H22O3	3	0.7179	-	422655	472469	428223	83404.2	146057	134203	1.4059	0.000262221	0.0659656	3.63892	1.86351	up	C02367	-
MW0131322	CID 131835430	3-(4-羟基-3-甲氧基苯基)-11，19-双（4-羟基苯基)-4，12，20-三氧杂七环[16.6.1.1（2），1（1），（1）（3）.0（2）（1），（2）.0，（2）.0（1、2）]二十七烷-1（25）5，7，9（27）13，15，17（26）21，23-壬烯-7，15，23-三醇	Alcohol and amines	醇、胺类	Alcohols	醇类	C43H32O10	3	0.7162	-	184701	116850	194078	369397	1.23289e+06	3.38728e+06	1.21936	0.236936	0.403616	0.0993329	-3.33158	down	-	-
MW0128123	[3-(8,8-Dimethyl-2-oxopyrano[2,3-]chromen-3-yl)-2-hydroxy-6-methoxyphenyl] hydrogen sulate	（3-{8,8-二甲基-2-氧代-2H，8H-吡拉诺[2,3-f]铬-3-基]-2-羟基-6-甲氧基苯基）氧化磺酸	Organic acids	有机酸	Organic acids	有机酸	C21H18O9S	3	0.7153	-	55237.7	131964	131346	9750.09	9351.5	24030.6	1.34954	0.0644179	0.209754	7.38538	2.88467	up	-	-
MW0131786	3,4,5-trihydroxy-6-[1-(6-hydroxy-2H-1,3-benzodioxol-5-yl)-3-(4-methoxy-1-benzofuran-5-yl)-1,3-dioxopropan-2-yl]oxane-2-carboxylic acid	3，4，5-三羟基-6-[1-(6-羟基-2H-1，3-苯并间二氧杂环戊烯-5-基)-3-(4-甲氧基-1-苯并呋喃-5-基)-1，3-二氧代丙-2-基]恶烷-2-羧酸	Organic acids	有机酸	Organic acids	有机酸	C25H22O13	3	0.714	-	11364.8	28294.8	20556.3	3457.26	14065.2	7566.29	1.02575	0.125963	0.287209	2.40012	1.26311	up	-	-
MEDN0391	3-Deoxy-D-Lyxo-Heptopyran-2-ularic Acid	二十二碳六烯酸	Lipids	脂质	Free fatty acids	游离脂肪酸	C7H10O8	3	0.7132	-	976.33	2200.02	2655.79	26701.9	24787.7	22061	1.41452	0.00133551	0.0714974	0.0792942	-3.65664	down	C21044	-
ZINC13373207	Artoindonesianin X	5-[6-羟基-7-(3-甲基-2-丁烯基)-1-苯并呋喃-2-基]-4，6-双（3-甲基-2-丁烯基）苯-1，3-二醇	Benzene and substituted derivatives	苯及其衍生物	Benzene and substituted derivatives	苯及其衍生物	C29H34O4	3	0.7118	-	3244.16	3426.32	1208.56	366.01	1115.78	345.36	1.20275	0.0917035	0.244683	4.3122	2.10842	up	-	-
MW0155712	Premithramycin A3	前红霉素 A3	Benzene and substituted derivatives	苯及其衍生物	Benzene and substituted derivatives	苯及其衍生物	C41H52O18	3	0.7106	-	2947.34	2714.4	590.56	7576.71	6543.03	4191.51	1.10859	0.0362401	0.164857	0.341446	-1.55027	down	C12387	ko01100,ko01110
MW0130188	2-(3,4-dihydroxyphenyl)-8-[3,4,5-trihydroxy-6-(hydroxymethyl)oxan-2-yl]-3,4-dihydro-2H-1-benzopyran-3,5,6,7-tetrol	2-(3，4-二羟基苯基)-8-[3，4，5-三羟基-6-(羟甲基）恶烷-2-基]-3，4-二氢-2H-1-苯并吡喃-3，5，6，7-四醇	Benzene and substituted derivatives	苯及其衍生物	Benzene and substituted derivatives	苯及其衍生物	C21H24O12	3	0.7102	-	1364.27	2537.75	1758.87	15690.7	10328.7	3412.11	1.2152	0.154349	0.318443	0.192342	-2.37826	down	-	-
MW0143477	5-(3,4-Diacetoxybut-1-ynyl)-2,2'-bithiophene	5-(3,4-二乙酰氧基丁-1-炔基)-2,2'-联噻吩	Heterocyclic compounds	杂环化合物	Heterocyclic compounds	杂环化合物	C16H14O4S2	3	0.7092	-	140369	111170	153578	15261.4	22572.1	61597.4	1.27869	0.00623566	0.101413	4.07436	2.02657	up	C04606	-
MW0109341	Pro-Tyr-Lys	脯氨酰-酪氨酰-赖氨酸	Amino acids and derivatives	氨基酸及其衍生物	Amino acids and derivatives	氨基酸及其衍生物	C20H30N4O5	3	0.709	-	2.76204e+06	3.08303e+06	3.93981e+06	1.55053e+06	1.40884e+06	1.24196e+06	1.40791	0.0277693	0.151014	2.329	1.21971	up	-	-
MW0127700	({6-[2-(3,4-dihydroxyphenyl)-5-hydroxy-4-oxo-8-[3,4,5-trihydroxy-6-(hydroxymethyl)oxan-2-yl]-7-[(3,4,5-trihydroxy-6-methyloxan-2-yl)oxy]-4H-chromen-6-yl]-3,4,5-trihydroxyoxan-2-yl}methoxy)sulfonic acid	（{6-[2-(3，4-二羟基苯基)-5-羟基-4-氧代-8-[3，4，5-三羟基-6-(羟甲基）恶烷-2-基]-7-[（3，4，5-三羟基-6-甲基恶烷-2-基）氧基]-4H-苯并吡喃-6-基]-3，4，5三羟基恶烷2-基}甲氧基）磺酸	Organic acids	有机酸	Organic acids	有机酸	C33H40O23S	3	0.709	-	1462.63	3900.94	3204.82	29568.9	101771	28882.6	1.36983	0.171625	0.337079	0.0534782	-4.2249	down	-	-
MW0134672	6-({2,4-dihydroxy-2-[(3-hydroxyphenyl)methyl]-3-oxo-2,3-dihydro-1-benzofuran-6-yl}oxy)-3,4,5-trihydroxyoxane-2-carboxylic acid	6-({2，4-二羟基-2-[（3-羟基苯基）甲基]-3-氧代-2，3-二氢-1-苯并呋喃-6-基}氧基)-3，4，5-三羟基恶烷-2-羧酸	Organic acids	有机酸	Organic acids	有机酸	C21H20O12	3	0.7075	-	6833.3	3112.3	6005.52	1711.18	786.61	3751.12	1.05468	0.0903296	0.243772	2.55262	1.35198	up	-	-
MW0167095	(2Z,4E)-5-(3,8-dihydroxy-1,5-dimethyl-6-oxabicyclo[3.2.1]octan-8-yl)-3-methylpenta-2,4-dienoic acid	(2Z,4E)-5-(3,8-dihydroxy-1,5-dimethyl-6-oxabicyclo[3.2.1]octan-8-yl)-3-methylpenta-2,4-dienoic acid	Organic acids	有机酸	Organic acids	有机酸	C15H22O5	3	0.7067	-	4078.1	6866.67	2811.28	12150.7	7913.64	9439.73	1.19557	0.0382332	0.168303	0.466242	-1.10085	down	-	-
ZINC85648303	RA-Xxi	（1S，4R，7S，10S，13S，16S)-7-乙基-24-羟基-10-[（4-甲氧基苯基）甲基]-4，9，13，15，29-五甲基-22-氧杂-3，6，9，12，15，29-六氮杂四环[14.1 2.2.218，21.123，27]三十一碳-18，20，23，25，27（31）32-己烯-2，5，8，11，14，30-己酮	Others	其它类	Ketone compounds	酮类化合物	C41H50N6O9	3	0.7052	-	62554.3	82021.7	77546.9	30515.3	30860	30634.5	1.43722	0.0179051	0.130834	2.41412	1.2715	up	-	-
MW0139605	Rotenonic acid, methyl ether	戊烯酸，甲醚	Organic acids	有机酸	Organic acids	有机酸	C24H26O6	3	0.7	-	472703	459421	443039	100991	199808	148793	1.37614	0.00509523	0.0976937	3.05869	1.61291	up	-	-
MW0105686	L-Arginyl-L-arginyl-L-arginine	L-精氨酰-L-精氨酰-L-精氨酸	Amino acids and derivatives	氨基酸及其衍生物	Amino acids and derivatives	氨基酸及其衍生物	C18H38N12O4	3	0.6964	-	2545.08	1344.98	1395.61	7693.73	12147.1	3293.79	1.23924	0.142353	0.304808	0.228475	-2.12989	down	-	-
MW0128567	[2-(5,7-Dihydroxy-4-oxo-2-phenylchromen-8-yl)-4,5-dihydroxyoxan-3-yl] hydrogen sulate	[2-(5，7-二羟基-4-氧代-2-苯基-4H-苯并吡喃-8-基)-4，5-二羟基氧烷-3-基]氧代磺酸	Organic acids	有机酸	Organic acids	有机酸	C20H18O11S	3	0.6963	-	1676.92	1563.69	1688.7	1736.67	5207.47	7852.4	1.05495	0.204322	0.369323	0.333139	-1.5858	down	-	-
MW0131611	3,4,5-trihydroxy-6-({7-methoxy-4-oxo-6-[3,4,5-trihydroxy-6-(hydroxymethyl)oxan-2-yl]-2-(2,4,5-trihydroxyphenyl)-4H-chromen-5-yl}oxy)oxane-2-carboxylic acid	3，4，5-三羟基-6-({7-甲氧基-4-氧代-6-[3，4，5-三羟基-6-(羟甲基）恶烷-2-基]-2-(2，4，5三羟基苯基)-4H-色烯-5-基}氧基）恶烷-2-羧酸	Organic acids	有机酸	Organic acids	有机酸	C28H30O18	3	0.6957	-	15937.1	10664.7	21651.8	1119.87	1315.86	3874.64	1.34956	0.0395488	0.170387	7.6467	2.93484	up	-	-
MW0012955	1-Palmitoyl-2-arachidonoyl-sn-glycero-3-phosphoglycerol	1-棕榈酰-2-花生四烯酰-sn-甘油-3-磷酸甘油	GP	甘油磷脂类	PG	磷脂酰甘油	C42H75O10P	3	0.6953	-	15322.1	10356	5571.59	1486.37	2307.64	703.62	1.32044	0.0831416	0.234943	6.94803	2.7966	up	-	-
MW0129293	{4-[2,3-dioxo-3-(2,4,6-trihydroxyphenyl)propyl]-2-methoxyphenyl}oxidanesulfonic acid	{4-[2，3-二氧代-3-(2，4，6-三羟基苯基）丙基]-2-甲氧基苯基}氧磺酸	Organic acids	有机酸	Organic acids	有机酸	C16H14O10S	3	0.6912	-	36085.7	72622.8	75087.8	31513.8	23584.9	18715.2	1.24252	0.0905212	0.243772	2.48999	1.31614	up	-	-
MEDP2118	2,3-Bis(4-hydroxyphenyl)propionitrile	2,3-双（4-羟基苯基）丙腈	Benzene and substituted derivatives	苯及其衍生物	Benzene and substituted derivatives	苯及其衍生物	C15H13NO2	3	0.6911	-	26276.1	100373	70345.7	263943	368734	130645	1.17797	0.100454	0.2554	0.258076	-1.95413	down	-	-
MW0110372	Val-Trp-Gln	缬氨酸-色氨酸-谷氨酰胺	Amino acids and derivatives	氨基酸及其衍生物	Amino acids and derivatives	氨基酸及其衍生物	C21H29N5O5	3	0.6905	-	51492.1	10610.4	6525.56	99595.8	40215.6	75505.8	1.08672	0.0970607	0.251644	0.31873	-1.64959	down	-	-
MW0135872	6-{[3-(3,4-dihydroxy-5-methoxyphenyl)prop-2-enoyl]oxy}-3,4,5-trihydroxyoxane-2-carboxylic acid	3-[3-羟基-5-甲氧基-4-(磺氧基）苯基]丙-2-烯酸	Benzene and substituted derivatives	苯及其衍生物	Benzene and substituted derivatives	苯及其衍生物	C16H18O11	3	0.6905	-	102135	181281	267592	50154.6	84427.4	124337	1.0227	0.167402	0.33187	2.12811	1.08957	up	-	-
MW0145361	Arg-Gly-His	L-精氨酰-甘氨酰-L-组氨酸	Amino acids and derivatives	氨基酸及其衍生物	Amino acids and derivatives	氨基酸及其衍生物	C14H24N8O4	3	0.6884	-	3998.42	1366.4	838.28	9939.91	10006	5611.74	1.24697	0.0266697	0.148825	0.24271	-2.0427	down	-	-
MW0136500	6-{4-[6-(3,4-dihydroxy-6-methyl-5-oxooxan-2-yl)-5,7-dihydroxy-4-oxo-4H-chromen-2-yl]-2-hydroxyphenoxy}-3,4,5-trihydroxyoxane-2-carboxylic acid	6-{4-[6-(3，4-二羟基-6-甲基-5-氧代恶烷-2-基)-5，7-二羟基-4-氧代-4H-苯并吡喃-2-基]-2-羟基苯氧基}-3，4，5-三羟基恶烷-2-羧酸	Organic acids	有机酸	Organic acids	有机酸	C27H26O16	3	0.6875	-	78279	34447.6	58653.4	256803	233673	325904	1.39131	0.00729101	0.10294	0.209927	-2.25204	down	-	-
ZINC70450914	[(1R)-1-(Hydroxymethyl)-2-(3-methoxy-4-hydroxyphenyl)ethyl]6-O-(alpha-L-rhamnopyranosyl)-beta-D-glucopyranoside	（2S，3R，4R，5R，6R)-2-甲基-6-[[（2R，3S，4S，5R，6R)-3，4，5-三羟基-6-[（2R)-1-羟基-3-(4-羟基-3-甲氧基苯基）丙-2-基]氧基恶烷-2-基]甲氧基]恶烷-3，4，5-三醇	Alcohol and amines	醇、胺类	Alcohols	醇类	C22H34O13	3	0.6873	-	23370.1	22523	32778.4	69913.6	56169.1	91548.8	1.36775	0.0360122	0.164627	0.361489	-1.46798	down	-	-
MW0154634	N-Phospho-D-lombricine	N-磷酸-D-水杨酸	Organic acids	有机酸	Organic acids	有机酸	C6H16N4O9P2	3	0.6866	-	8041.99	9178.91	7163.39	26347.5	21339	36992.9	1.40569	0.0469051	0.181893	0.28796	-1.79606	down	C02855	ko00470,ko01100
MW0154041	Myxochromide S2	粘铬化物 S2	Alcohol and amines	醇、胺类	Amines	胺类	C39H56N6O8	3	0.6854	-	995.11	2677.87	1969.42	15024.6	17964	7390.75	1.34807	0.063525	0.208899	0.139735	-2.83924	down	-	-
MW0131736	(2S,3S,4S,5R,6S)-3,4,5-trihydroxy-6-(4-methyl-2-oxochromen-7-yl)oxyoxane-2-carboxylic acid	3,4,5-三羟基-6-[（4-甲基-2-氧代-2H-铬-7-基）氧]氧烷-2-羧酸	Organic acids	有机酸	Organic acids	有机酸	C16H16O9	3	0.6844	-	23471.1	46385.4	33684.5	61082.5	101665	125785	1.26939	0.0691348	0.215437	0.358854	-1.47853	down	-	-
MW0111581	{4-[3-(5-methoxy-2,2-dimethyl-2H-chromen-6-yl)oxirane-2-carbonyl]phenyl}oxidanesulfonic acid	{4- [3-(5-甲氧基-2,2-二甲基-2H-铬6-基）环氧乙烷-2-羰基]苯基}氧磺酸	Organic acids	有机酸	Organic acids	有机酸	C21H20O8S	3	0.6829	-	1.05254e+06	1.10184e+06	1.12767e+06	279890	324704	772390	1.21817	0.0536475	0.193768	2.38351	1.25309	up	-	-
MW0127779	1,7-Bis(4-hydroxyphenyl)-5-hydroxy-1-heptene-3-one	（1E)-5-羟基-1,7-双（4-羟基苯基）庚-1-烯-3-酮	Others	其它类	Ketone compounds	酮类化合物	C19H20O4	3	0.6826	-	4332.8	11611.8	2429.36	68422.4	62165.6	40932.7	1.3576	0.0173765	0.129417	0.107124	-3.22265	down	-	-
MW0148284	Deoxyloganin tetraacetate	四乙酸脱氧马钱素	Others	其它类	Lactones	内酯类化合物	C25H34O13	3	0.6791	-	66145.5	41152	33372.1	138236	116478	120462	1.35743	0.00436848	0.0945682	0.374943	-1.41526	down	-	-
MW0128573	[2-(methoxymethyl)-5-(3,5,7-trihydroxy-3,4-dihydro-2H-1-benzopyran-2-yl)phenyl]oxidanesulfonic acid	[2-(甲氧基甲基)-5-(3，5，7-三羟基-3，4-二氢-2H-1-苯并吡喃-2-基）苯基]氧代磺酸	Organic acids	有机酸	Organic acids	有机酸	C17H18O9S	3	0.6781	-	187611	213663	184377	31673.6	22130.8	77377.6	1.32428	0.00394718	0.0915745	4.46442	2.15847	up	-	-
MW0131643	3,4,5-trihydroxy-6-(3-{3,5,6,7-tetrahydroxy-8-[3,4,5-trihydroxy-6-(hydroxymethyl)oxan-2-yl]-3,4-dihydro-2H-1-benzopyran-2-yl}phenoxy)oxane-2-carboxylic acid	3，4，5-三羟基-6-(3-{3，5，6，7-四羟基-8-[3，4，5-三羟基-6-(羟甲基）恶烷-2-基]-3，4-二氢-2H-1-苯并吡喃-2-基}苯氧基）恶烷-2-羧酸	Organic acids	有机酸	Organic acids	有机酸	C27H32O17	3	0.6762	-	135087	47277.9	135190	19042	15126.4	43363.4	1.2096	0.101577	0.257171	4.0958	2.03415	up	-	-
MW0128813	[5-(2-{[(2E)-3-(3,4-dihydroxyphenyl)prop-2-enoyl]oxy}-3-methoxy-3-oxopropyl)-2-hydroxyphenyl]oxidanesulfonic acid	[5-(2-{[（2E)-3-(3，4-二羟基苯基）丙-2-烯酰基]氧基}-3-甲氧基-3-氧代丙基)-2-羟基苯基]氧代磺酸	Organic acids	有机酸	Organic acids	有机酸	C19H18O11S	3	0.6744	-	37584.4	141736	93287.3	24548.4	26838.4	37924	1.12933	0.177279	0.341649	3.05235	1.60992	up	-	-
MW0134769	6-({5,7-dihydroxy-4-oxo-2-phenyl-8-[3,4,5-trihydroxy-6-(hydroxymethyl)oxan-2-yl]-4H-chromen-6-yl}oxy)-3,4,5-trihydroxyoxane-2-carboxylic acid	6-({5，7-二羟基-4-氧代-2-苯基-8-[3，4，5-三羟基-6-(羟甲基）恶烷-2-基]-4H-苯并吡喃-6-基}氧基)-3，4，5-三羟基恶烷-2-羧酸	Organic acids	有机酸	Organic acids	有机酸	C27H28O16	3	0.674	-	771184	413891	349199	1.52235e+06	854394	1.04408e+06	1.19807	0.0667486	0.213008	0.448511	-1.15679	down	-	-
MW0132045	3,4,5-trihydroxy-6-{[3,5,7-trihydroxy-2-(3-hydroxyphenyl)-4-oxo-4H-chromen-6-yl]oxy}oxane-2-carboxylic acid	3，4，5-三羟基-6-{[3，5，7-三羟基-2-(3-羟基苯基)-4-氧代-4H-苯并吡喃-6-基]氧}氧杂环己烷-2-羧酸	Organic acids	有机酸	Organic acids	有机酸	C21H18O13	3	0.6726	-	4317.6	2295.78	8558.25	211.31	42.26	42.26	1.39599	0.114931	0.274258	51.285	5.68046	up	-	-
MW0138535	Isorhapontin	E-4，5'-二羟基-3-甲氧基-3'-吡喃葡萄糖基二苯乙烯	Heterocyclic compounds	杂环化合物	Heterocyclic compounds	杂环化合物	C21H24O9	3	0.6723	-	150487	154755	145083	546317	406604	367931	1.42101	0.0328426	0.157371	0.340935	-1.55243	down	-	-
MW0112679	3,4,5-trihydroxy-6-{4-[(1Z)-2-methyl-3-oxoprop-1-en-1-yl]phenoxy}oxane-2-carboxylic acid	3，4，5-三羟基-6-{4-[（1Z)-2-甲基-3-氧代丙-1-烯-1-基]苯氧基}恶烷-2-羧酸	Organic acids	有机酸	Organic acids	有机酸	C16H18O8	3	0.6715	-	113689	152070	221229	238157	514666	753458	1.17727	0.14475	0.308216	0.323304	-1.62904	down	-	-
MW0136021	CID 73173263	6-{[5，7-二羟基-2-(4-羟基苯基)-4-氧代-4H-苯并吡喃-6-基]氧}-3，4，5-三羟基恶烷-2-羧酸	Organic acids	有机酸	Organic acids	有机酸	C21H18O12	3	0.6687	-	445040	247957	271654	129279	137380	156034	1.30805	0.0984053	0.25269	2.28216	1.1904	up	-	-
MW0001018	{[3-(3,4-dihydroxyphenyl)-1-methoxy-1-oxopropan-2-yl]oxy}sulfonic acid	{[3-(3，4-二羟基苯基)-1-甲氧基-1-氧代丙-2-基]氧基}磺酸	Phenolic acids	酚酸类	Phenolic acids	酚酸类	C10H12O8S	3	0.6676	-	144674	184594	178940	9772.76	7300.3	20665.3	1.41984	0.00324223	0.0850936	13.4666	3.75131	up	-	-
ZINC85648306	RA-Xxii	（1S，4R，7S，10S，13S，16S)-24-羟基-7-[（1R)-1-羟乙基]-10-[（4-甲氧基苯基）甲基]-4，9，13，15，29-五甲基-22-氧杂-3，6，9，12，15，29-六氮杂四环[14.1 2.2.218，21.123，27]三十一碳-18，20，23，25，27（31）32-六烯-2，5，8，11，	Others	其它类	Ketone compounds	酮类化合物	C41H50N6O10	3	0.6675	-	37645.1	101249	71893	22911	18453.1	19474.3	1.30818	0.112013	0.271351	3.46471	1.79274	up	-	-
MW0135910	6-[3,5-Dihydroxy-2-(3-hydroxy-2,2-dimethyl-3,4-dihydrochromen-6-yl)-4-oxochromen-7-yl]oxy-3,4,5-trihydroxyoxane-2-carboxylic acid	6-{[3，5-二羟基-2-(3-羟基-2，2-二甲基-3，4-二氢-2H-1-苯并吡喃-6-基)-4-氧代-4H-苯并吡喃-7-基]氧}-3，4，5-三羟基氧杂环己烷-2-羧酸	Organic acids	有机酸	Organic acids	有机酸	C26H26O13	3	0.6674	-	29324.1	31793.8	42612	19101.8	10419	15554.9	1.31599	0.0217671	0.140802	2.30124	1.20241	up	-	-
MW0166457	Guaiacol beta-primeveroside	愈创木酚 β-primeveroside	Alcohol and amines	醇、胺类	Alcohols	醇类	C18H26O11	3	0.6673	-	11999.6	11483.5	3140.91	31292.2	35627.3	21777.6	1.21085	0.0179662	0.131074	0.300166	-1.73617	down	-	-
MW0132256	3,4,5-trihydroxy-6-{[7-methoxy-3-(3-methoxyphenyl)-8-methyl-4-oxo-4H-chromen-5-yl]oxy}oxane-2-carboxylic acid	3，4，5-三羟基-6-{[7-甲氧基-3-(3-甲氧基苯基)-8-甲基-4-氧代-4H-苯并吡喃-5-基]氧}恶烷-2-羧酸	Organic acids	有机酸	Organic acids	有机酸	C24H24O11	3	0.6666	-	49453.4	36805.8	21770.6	21006.3	20342.7	11921.3	1.08599	0.138361	0.300701	2.02796	1.02003	up	-	-
MW0145513	Arg-Thr-Cys	L-精氨酰-L-苏氨酰-L-半胱氨酸	Amino acids and derivatives	氨基酸及其衍生物	Amino acids and derivatives	氨基酸及其衍生物	C13H26N6O5S1	3	0.6665	-	64315.6	99958.9	55073.1	143040	141295	157054	1.31097	0.0221356	0.140919	0.496949	-1.00883	down	-	-
MW0136280	6-{3,5-dihydroxy-4-[3-(3-hydroxy-4,5-dimethoxyphenyl)prop-2-enoyl]phenoxy}-3,4,5-trihydroxyoxane-2-carboxylic acid	6-{2，3-二甲氧基-5-[3-氧代-3-(2，4，6-三羟基苯基）丙-1-烯-1-基]苯氧基}-3，4，5-三羟基恶烷-2-羧酸	Benzene and substituted derivatives	苯及其衍生物	Benzene and substituted derivatives	苯及其衍生物	C23H24O13	3	0.6646	-	63858.4	58463.2	59333.9	24150.5	26462.2	32419.1	1.41841	0.000741728	0.0686411	2.18778	1.12947	up	-	-
MW0136288	6-{3,5-dihydroxy-4-[3-(4-hydroxy-3,5-dimethoxyphenyl)prop-2-enoyl]phenoxy}-3,4,5-trihydroxyoxane-2-carboxylic acid	6-{2，6-二甲氧基-4-[3-氧代-3-(2，4，6-三羟基苯基）丙-1-烯-1-基]苯氧基}-3，4，5-三羟基恶烷-2-羧酸	Benzene and substituted derivatives	苯及其衍生物	Benzene and substituted derivatives	苯及其衍生物	C23H24O13	3	0.6638	-	11741.5	3097.28	8211.26	28002.4	34199.9	33752.1	1.29986	0.00197577	0.0802	0.240218	-2.05758	down	-	-
MW0136576	6-{5-carboxy-2-hydroxy-3-[2,4,5-trihydroxy-3-(3,4,5-trihydroxybenzoyloxy)benzoyloxy]phenoxy}-3,4,5-trihydroxyoxane-2-carboxylic acid	6-{5-羧基-2-羟基-3-[2，4，5-三羟基-3-(3，4，5-三羟基苯甲酰氧基）苯甲酰氧基]苯氧基}-3，4-三羟基恶烷-2-羧酸	Organic acids	有机酸	Organic acids	有机酸	C27H22O20	3	0.6632	-	7536.92	53209.6	23258.8	10408.6	4683.14	1724.44	1.05521	0.233829	0.400209	4.9955	2.32063	up	-	-
MW0140066	(-)-Tortuosamine	（-)-叔丁胺;叔丁胺	Heterocyclic compounds	杂环化合物	Heterocyclic compounds	杂环化合物	C20H26N2O2	3	0.6608	-	12154.9	21305.3	10101.5	56714.7	32828.3	18824.3	1.07972	0.182376	0.347538	0.401981	-1.3148	down	-	-
MW0117343	Ribocil	Ribocil	Heterocyclic compounds	杂环化合物	Heterocyclic compounds	杂环化合物	C19H22N6OS	3	0.6604	-	712.29	1045.48	627.34	1525.28	2762.49	3239.92	1.31749	0.0707565	0.217857	0.316845	-1.65815	down	-	-
MW0112393	CID 76120403	3，4，5-三羟基-6-(4-羟基苯甲酰氧基）恶烷-2-羧酸	Organic acids	有机酸	Organic acids	有机酸	C13H14O9	3	0.6579	-	165301	126312	165244	27507	40200.5	65052.6	1.34576	0.00345672	0.0862322	3.44121	1.78292	up	-	-
MW0135502	6-[4-({[2-(3,4-dihydroxyphenyl)-5,7-dihydroxy-3,4-dihydro-2H-1-benzopyran-3-yl]oxy}carbonyl)-2,6-dihydroxyphenoxy]-3,4,5-trihydroxyoxane-2-carboxylic acid	6-[4-({[2-(3，4-二羟基苯基)-5，7-二羟基-3，4-二氢-2H-1-苯并吡喃-3-基]氧基}羰基)-2，6-二羟基苯氧基]-3，4，5-三羟基恶烷-2-羧酸	Organic acids	有机酸	Organic acids	有机酸	C28H26O16	3	0.6541	-	238526	575548	429574	13779	64822.1	241609	1.0639	0.0683852	0.214397	3.88385	1.95749	up	-	-
MW0144518	Ala-Asp-Phe-Asp	Ala-Asp-Phe-Asp	Amino acids and derivatives	氨基酸及其衍生物	Amino acids and derivatives	氨基酸及其衍生物	C20H26N4O9	3	0.6525	-	472120	682846	635968	350629	284698	165543	1.26266	0.0178352	0.130796	2.23623	1.16107	up	-	-
MW0128777	[4,5-dihydroxy-2-({7-oxo-7H-furo[3,2-g]chromen-9-yl}oxy)oxan-3-yl]oxidanesulfonic acid	[4，5-二羟基-2-({7-氧代-7H-呋喃并[3，2-g]苯并吡喃-9-基}氧基）氧杂环己烷-3-基]氧代磺酸	Organic acids	有机酸	Organic acids	有机酸	C16H14O11S	3	0.6512	-	178481	269327	389944	21484.7	16463	47130.5	1.3879	0.0516924	0.190755	9.84686	3.29966	up	-	-
MW0112675	3,4,5-trihydroxy-6-{4-[(1E)-3-oxobut-1-en-1-yl]phenoxy}oxane-2-carboxylic acid	3，4，5-三羟基-6-{4-[（1E)-3-氧代丁-1-烯-1-基]苯氧基}恶烷-2-羧酸	Organic acids	有机酸	Organic acids	有机酸	C16H18O8	3	0.6509	-	25897.4	17127.2	24850.2	2220.81	3831.85	8556.15	1.30309	0.00852447	0.106245	4.64615	2.21604	up	-	-
MW0061105	1-(9Z-hexadecenoyl)-glycero-3-phospho-(1'-sn-glycerol)	PG（16：1（9Z）/ 0：0）	GP	甘油磷脂类	PG	磷脂酰甘油	C22H43O9P	3	0.6509	-	6458.97	3075.9	2184.35	857.84	2016.65	1487.51	1.08917	0.194735	0.361139	2.68666	1.42581	up	-	-
MW0135832	6-{[2-(3,4-dihydroxyphenyl)-8-[1-(2,4-dihydroxyphenyl)-3-(3,4-dihydroxyphenyl)-2-hydroxypropyl]-3,5-dihydroxy-3,4-dihydro-2H-1-benzopyran-7-yl]oxy}-3,4,5-trihydroxyoxane-2-carboxylic acid	6-{2-(3,4-二羟苯基)-8-[1-(2,4-二羟苯基)-3-(3,4-二羟苯基)-2-羟丙基]-3,5-二羟基-3,4-二氢-2H-1-苯并吡喃-7-基]氧]-3,4,5-三羟基氧烷-2-羧酸	Organic acids	有机酸	Organic acids	有机酸	C36H36O17	3	0.6494	-	85604.7	51389.5	60218.6	6467.95	3650.58	21576.2	1.28909	0.0168398	0.127675	6.22226	2.63744	up	-	-
MW0002530	2-[2,3,4-trihydroxy-6-methoxy-5-(3-methylbut-2-en-1-yl)phenyl]acetic acid	2-[2，3，4-三羟基-6-甲氧基-5-(3-甲基-2-丁烯-1-基）苯基]乙酸	Benzene and substituted derivatives	苯及其衍生物	Benzene and substituted derivatives	苯及其衍生物	C14H18O6	3	0.6475	-	497250	275900	370488	1.31748e+06	1.10277e+06	1.09697e+06	1.39401	0.00130192	0.0714974	0.325154	-1.62081	down	-	-
MW0135686	6-[[2-(2,4-dihydroxyphenyl)-3-[(2Z)-3,7-dimethylocta-2,6-dienyl]-5-hydroxy-6-(3-methylbut-2-enyl)-4-oxo-2,3-dihydrochromen-7-yl]oxy]-3,4,5-trihydroxyoxane-2-carboxylic acid	6-{[2-(2，4-二羟基苯基)-3-(3，7-二甲基辛-2，6-二烯-1-基)-7-羟基-6-(3-甲基丁-2-烯-1-基)-4-氧代-3，4-二氢-2H-1-苯并吡喃-5-基]氧基}-3，4，5-三羟基恶烷-2-羧酸	Organic acids	有机酸	Organic acids	有机酸	C36H44O12	3	0.6441	-	44856.7	30430.5	35116.4	16162.3	15628.2	17429	1.39561	0.0389208	0.169411	2.24309	1.16549	up	-	-
MW0130771	2-hydroxy-2-(4-hydroxyphenyl)ethyl 3-(3,4-dihydroxyphenyl)prop-2-enoate	2-羟基-2-(4-羟基苯基）乙基3-(2,4-二羟基-3-甲氧基苯基）丙-2-烯酸盐	Others	其它类	Lactones	内酯类化合物	C17H16O6	3	0.6437	-	110716	161054	171089	352558	552231	911741	1.33128	0.105624	0.264059	0.243794	-2.03626	down	-	-
MW0124747	Mangiferin	芒果苷	Flavonoids	黄酮	Other Flavonoids	其它类黄酮	C19H18O11	3	0.6423	-	11818.3	102668	64698.4	259071	171239	209431	1.10646	0.0138091	0.118218	0.280089	-1.83604	down	C10077	-
MW0136179	6-{2-[3-(3,5-dihydroxyphenyl)-2-oxopropanoyl]-3,4,5-trihydroxyphenoxy}-3,4,5-trihydroxyoxane-2-carboxylic acid	6-{2-[3-(3，5-二羟基苯基)-2-氧代丙酰基]-3，4，5-三羟基苯氧基}-3，4，5-三羟基恶烷-2-羧酸	Organic acids	有机酸	Organic acids	有机酸	C21H20O14	3	0.642	-	29441.5	30315	17549.5	2559	3382.04	3207.99	1.43056	0.0309115	0.155594	8.44965	3.07889	up	-	-
MW0127706	({6-[5,7-dihydroxy-2-(3-hydroxy-4-methoxyphenyl)-4-oxo-3-[3,4,5-trihydroxy-6-(hydroxymethyl)oxan-2-yl]-4H-chromen-8-yl]-3,4,5-trihydroxyoxan-2-yl}methoxy)sulfonic acid	（{6-[5，7-二羟基-2-(3-羟基-4-甲氧基苯基)-4-氧代-3-[3，4，5-三羟基-6-(羟甲基）恶烷-2-基]-4H-苯并吡喃-8-基]-3，4，5-三羟基恶烷-2-基}甲氧基）磺酸	Organic acids	有机酸	Organic acids	有机酸	C28H32O19S	3	0.6409	-	103904	76102.7	102742	4628.86	84.49	10795.1	1.17497	0.00564027	0.0998888	18.232	4.1884	up	-	-
MW0110188	Tyr-Asn-Lys	酪氨酸-天冬酰胺-赖氨酸	Amino acids and derivatives	氨基酸及其衍生物	Amino acids and derivatives	氨基酸及其衍生物	C19H29N5O6	3	0.64	-	129625	150779	170853	73046.8	71590.1	62623.7	1.42486	0.0154432	0.123259	2.17725	1.12251	up	-	-
MW0136049	6-{[6-(3,4-dihydroxy-6-methyl-5-oxooxan-2-yl)-7-hydroxy-4-oxo-2-phenyl-4H-chromen-5-yl]oxy}-3,4,5-trihydroxyoxane-2-carboxylic acid	6-{[6-(3,4-二羟基-6-甲基-5-氧代恶烷-2-基)-7-羟基-4-氧代-2-苯基-4H-铬-5-基]氧基} -3 ，4,5-三羟基恶烷-2-羧酸	Organic acids	有机酸	Organic acids	有机酸	C27H26O14	3	0.6399	-	3638.04	12288.6	3867.8	202980	200421	40394.5	1.33467	0.118983	0.277294	0.0446026	-4.48673	down	-	-
MW0113484	6-[3-(2-carboxyeth-1-en-1-yl)-4-hydroxyphenoxy]-3,4,5-trihydroxyoxane-2-carboxylic acid	6-[2-(2-羧基乙-1-烯-1-基)-4-羟基苯氧基]-3，4，5-三羟基氧烷-2-羧酸	Benzene and substituted derivatives	苯及其衍生物	Benzene and substituted derivatives	苯及其衍生物	C15H16O10	3	0.6391	-	37103.5	64349.8	54334.6	7429.15	24900.4	28998.4	1.09714	0.0399613	0.171052	2.54024	1.34497	up	-	-
MW0136513	6-{4-carboxy-2-hydroxy-6-[2,4,5-trihydroxy-3-(3,4,5-trihydroxybenzoyloxy)benzoyloxy]phenoxy}-3,4,5-trihydroxyoxane-2-carboxylic acid	6-{4-羧基-2-羟基-6-[2，4，5-三羟基-3-(3，4，5-三羟基苯甲酰氧基）苯甲酰氧基]苯氧基}-3，4-三羟基恶烷-2-羧酸	Organic acids	有机酸	Organic acids	有机酸	C27H22O20	3	0.638	-	41626.7	43693.8	55310.3	4759.9	3424.83	9519.63	1.4017	0.00439623	0.0945682	7.94329	2.98974	up	-	-
MW0047849	CL(i-14:0/i-14:0/a-13:0/i-14:0)[rac]	CL(i-14:0/i-14:0/a-13:0/i-14:0)[rac]	GP	甘油磷脂类	CL	心磷脂	C64H124O17P2	3	0.6373	-	23732.9	19061.7	9807.85	4897.16	8303.78	6557.56	1.20808	0.10873	0.267021	2.66227	1.41266	up	-	-
MW0135553	Naringenin-4'-o-beta-d-glucuronide	Naringenin-4'-o-beta-d-glucuronide	Flavonoids	黄酮	Chalcones	查耳酮	C21H20O11	3	0.637	-	261465	236381	295295	7281.01	9423.8	102859	1.22109	0.00758031	0.10294	6.63361	2.72979	up	-	-
MW0135440	6-[2,6-dihydroxy-4-(3,5,7-trihydroxy-4-oxo-3,4-dihydro-2H-1-benzopyran-2-yl)phenoxy]-3,4,5-trihydroxyoxane-2-carboxylic acid	6-[2，6-二羟基-4-(3，5，7-三羟基-4-氧代-3，4-二氢-2H-1-苯并吡喃-2-基）苯氧基]-3，4，5-三羟基恶烷-2-羧酸	Organic acids	有机酸	Organic acids	有机酸	C21H20O14	3	0.6354	-	257759	201033	303924	8969.68	12178.1	57714.8	1.32662	0.0063211	0.101413	9.67145	3.27373	up	-	-
MW0134697	6-({2-[4-ethyl-3-(sulfooxy)phenyl]-3,5-dihydroxy-3,4-dihydro-2H-1-benzopyran-7-yl}oxy)-3,4,5-trihydroxyoxane-2-carboxylic acid	6-({2-[4-乙基-3-(磺氧基）苯基]-3，5-二羟基-3，4-二氢-2H-1-苯并吡喃-7-基}氧基)-3，4，5-三羟基恶烷-2-羧酸	Organic acids	有机酸	Organic acids	有机酸	C23H26O14S	3	0.6343	-	10432.1	12848.6	11902.9	5329.5	3541.4	6950.77	1.31024	0.00785143	0.10294	2.22376	1.153	up	-	-
MW0141756	(2E)-4-hydroxy-3-methylbut-2-en-1-yl trihydrogen diphosphate	1-羟基-2-甲基-2-丁烯基4-二磷酸；（E)-4-羟基-3-甲基-丁-2-烯基二磷酸酯；（E)-4-羟基-3-甲基丁-2-烯-1-基二磷酸酯	Organic acids	有机酸	Organic acids	有机酸	C5H12O8P2	3	0.6337	-	42127.5	52846.3	63323.6	24394.1	19545	27670	1.364	0.0294242	0.153711	2.21058	1.14442	up	-	-
MW0128696	[3,5-dihydroxy-2-({7-oxo-7H-furo[3,2-g]chromen-9-yl}oxy)oxan-4-yl]oxidanesulfonic acid	[3，5-二羟基-2-({7-氧代-7H-呋喃并[3，2-g]苯并吡喃-9-基}氧基）氧烷-4-基]氧代磺酸	Organic acids	有机酸	Organic acids	有机酸	C16H14O11S	3	0.6335	-	853372	876731	958706	198200	131478	390445	1.32992	0.00661717	0.101668	3.73382	1.90065	up	-	-
MW0112383	3,4,5-Trihydroxy-6-(3,4,5-trihydroxycyclohexene-1-carbonyl)oxyoxane-2-carboxylic acid	3，4，5-三羟基-6-(3，4，5-三羟基环己-1-烯-1-甲酰氧基）恶烷-2-羧酸	Organic acids	有机酸	Organic acids	有机酸	C13H18O11	3	0.6321	-	49407.1	38878	30859.6	44966.2	86993.9	124532	1.08221	0.179276	0.344589	0.464516	-1.1062	down	-	-
MW0158714	Tyr-Met-OH	Tyr-Met-OH	Amino acids and derivatives	氨基酸及其衍生物	Amino acids and derivatives	氨基酸及其衍生物	C20H22N2O7S	3	0.6313	-	44130.4	97743.5	30432.2	184752	132362	174158	1.24419	0.01692	0.127821	0.350735	-1.51155	down	-	-
MW0131933	3,4,5-trihydroxy-6-[4-hydroxy-2-(7-hydroxy-4-oxo-4H-chromen-2-yl)-5-methoxyphenoxy]oxane-2-carboxylic acid	3，4，5-三羟基-6-[4-羟基-2-(7-羟基-4-氧代-4H-苯并吡喃-2-基)-5-甲氧基苯氧基]恶烷-2-羧酸	Organic acids	有机酸	Organic acids	有机酸	C22H20O12	3	0.6311	-	27015.4	57515.7	35533.7	9349.36	19632.8	21226.8	1.15013	0.109701	0.267762	2.3913	1.2578	up	-	-
MW0128607	[8-(2-hydroxy-1-sulooxypropan-2-yl)-2-oxo-8,9-dihydrouro[2,3-h]chromen-9-yl] (E)-2-methylbut-2-enoate	[2-羟基-2-(9-{[（2E)-2-甲基丁-2-烯酰基]氧基}-2-氧代-2H，8H，9H-呋喃并[2，3-h]苯并吡喃-8-基）丙氧基]磺酸	Organic acids	有机酸	Organic acids	有机酸	C19H20O10S	3	0.6308	-	440234	929823	1.10192e+06	167491	237652	416693	1.1975	0.0950207	0.2486	3.00788	1.58875	up	-	-
MW0154754	Ophiopogonone B	麦冬高异黄酮 B	Flavonoids	黄酮	Other Flavonoids	其它类黄酮	C18H16O5	3	0.6294	-	36912.1	61723	50667.6	1428.22	1212.15	4992.08	1.3978	0.0198716	0.136802	19.5616	4.28995	up	C17472	-
MW0129189	{3-[2-(3,5-dihydroxyphenyl)ethyl]phenyl}oxidanesulfonic acid	{3-[2-(3，5-二羟基苯基）乙基]苯基}氧磺酸	Organic acids	有机酸	Organic acids	有机酸	C14H14O6S	3	0.6292	-	3166.96	8389	3159.82	23089.2	31774.1	10995.6	1.2531	0.0956883	0.249856	0.223444	-2.16201	down	-	-
MW0112673	3,4,5-trihydroxy-6-{4-[(1E)-3-oxo-3-{2,3,4-trihydroxy-5-[hydroxy(3,4,5-trihydroxyoxan-2-yl)methyl]-6-oxo-3-[3,4,5-trihydroxy-6-(hydroxymethyl)oxan-2-yl]cyclohexa-1,4-dien-1-yl}prop-1-en-1-yl]phenoxy}oxane-2-carboxylic acid	{4-[（1E)-3-氧代-3-{2，3，4-三羟基-5-[羟基（3，4，5-三羟基恶烷-2-基）甲基]-6-氧代-3-[3，4，5-三羟基-6-(羟基甲基）恶烷-2-基]环己-1，4-二烯-1-基}丙-1-烯-1-基]苯基}氧代磺酸	Benzene and substituted derivatives	苯及其衍生物	Benzene and substituted derivatives	苯及其衍生物	C33H40O22	3	0.6283	-	85315.8	39488.2	44635.4	179360	162653	114133	1.29175	0.0200523	0.137581	0.371459	-1.42873	down	-	-
MW0134719	6-({3-[(6-carboxy-3,4,5-trihydroxyoxan-2-yl)oxy]-2-(3,4-dihydroxyphenyl)-7-hydroxy-4-oxo-4H-chromen-5-yl}oxy)-3,4,5-trihydroxyoxane-2-carboxylic acid	6-({3-[（6-羧基-3，4，5-三羟基恶烷-2-基）氧基]-2-(3，4-二羟基苯基)-7-羟基-4-氧代-4H-色烯-5-基}氧基)-3，4，5-三羟基恶烷-2-羧酸	Organic acids	有机酸	Organic acids	有机酸	C27H26O19	3	0.6278	-	19436.9	11570	20767.5	675.62	1228.43	2117.37	1.39988	0.0288213	0.15317	12.8747	3.68646	up	-	-
MW0132453	3,4,5-trihydroxy-6-{3-hydroxy-5-[(E)-2-(4-{[3,4,5-trihydroxy-6-(hydroxymethyl)oxan-2-yl]oxy}phenyl)ethenyl]phenoxy}oxane-2-carboxylic acid	3，4，5-三羟基-6-{3-羟基-5-[（E)-2-(4-{[3，4，5-三羟基-6-(羟甲基）恶烷-2-基]氧基}苯基）乙烯基]苯氧基}恶烷-2-羧酸	Organic acids	有机酸	Organic acids	有机酸	C26H30O14	3	0.6254	-	74885.9	111280	102336	25219.2	22552.5	16250	1.42491	0.0163806	0.126393	4.50633	2.17195	up	-	-
MW0130513	2-[(3-amino-2-oxo-2H-chromen-4-yl)amino]benzoic acid	2-[(3-氨基-2-氧代-2H-色烯-4-基)氨基]苯甲酸	Organic acids	有机酸	Organic acids	有机酸	C16H12N2O4	3	0.6254	-	26744.3	45358.8	26581.6	15463.3	14578.1	10370.9	1.31043	0.0814124	0.233037	2.44194	1.28803	up	-	-
MW0133978	[5,6-Dihydroxy-2-(hydroxymethyl)-4-(3,4,5-trihydroxybenzoyl)oxyoxan-3-yl] 3,4,5-trihydroxybenzoate	5，6-二羟基-2-(羟甲基)-4-(3，4，5-三羟基苯甲酰氧基）恶烷-3-基3，4，5-三羟基苯甲酸酯	Benzene and substituted derivatives	苯及其衍生物	Benzene and substituted derivatives	苯及其衍生物	C20H20O14	3	0.6239	-	34244	19429.6	32204.9	471.8	7648.52	10417.5	1.05062	0.0208706	0.139338	4.63262	2.21183	up	-	-
MW0131629	3,4,5-trihydroxy-6-(2-hydroxy-5-{3,5,6,7-tetrahydroxy-8-[3,4,5-trihydroxy-6-(hydroxymethyl)oxan-2-yl]-3,4-dihydro-2H-1-benzopyran-2-yl}phenoxy)oxane-2-carboxylic acid	3，4，5-三羟基-6-(2-羟基-5-{3，5，6，7-四羟基-8-[3，4，5-三羟基-6-(羟甲基）恶烷-2-基]-3，4-二氢-2H-1-苯并吡喃-2-基}苯氧基）恶烷-2-羧酸	Organic acids	有机酸	Organic acids	有机酸	C27H32O18	3	0.6232	-	806.79	1070.49	707.13	5514.28	5741.41	1109.04	1.12281	0.162444	0.32802	0.209015	-2.25832	down	-	-
MW0155114	Phe-Asn-Thr-Lys	Phe-Asn-Thr-Lys	Amino acids and derivatives	氨基酸及其衍生物	Amino acids and derivatives	氨基酸及其衍生物	C23H36N6O7	3	0.6215	-	98027.3	123935	109550	38691.9	25664.6	35406.6	1.42363	0.00271696	0.0850936	3.32299	1.73248	up	-	-
MW0153781	Met-HoPhe-OH	Met-HoPhe-OH	Heterocyclic compounds	杂环化合物	Heterocyclic compounds	杂环化合物	C20H22N2O6S	3	0.6198	-	282410	192557	137912	41510.5	49810.4	110705	1.22396	0.0631479	0.208395	3.03367	1.60106	up	-	-
MW0136338	6-{3-[3,4-dihydroxy-5-(3,4,5-trihydroxybenzoyloxy)benzoyloxy]-4,5-dihydroxybenzoyloxy}-3,4,5-trihydroxyoxane-2-carboxylic acid	6-{3-[3，4-二羟基-5-(3，4，5-三羟基苯甲酰氧基）苯甲酰氧基]-4，5-二羟基苯甲氧基}-3，4，5-三羟基恶烷-2-羧酸	Organic acids	有机酸	Organic acids	有机酸	C27H22O19	3	0.6198	-	248871	346153	225479	66445.5	60683.4	29631.1	1.38519	0.0193542	0.135043	5.23413	2.38795	up	-	-
MW0104948	3-[4-(sulfooxy)phenyl]oxirane-2-carboxylic acid	3-[4-(磺氧基）苯基]环氧乙烷-2-羧酸	Organic acids	有机酸	Organic acids	有机酸	C9H8O7S	3	0.619	-	93694.2	90548.5	44063.4	232213	286566	197290	1.3371	0.00985067	0.110286	0.318833	-1.64913	down	-	-
MW0128928	{[1-(2,4-dihydroxyphenyl)-3-(3,4-dihydroxyphenyl)-1-[3,5,7-trihydroxy-2-(3-hydroxyphenyl)-3,4-dihydro-2H-1-benzopyran-8-yl]propan-2-yl]oxy}sulfonic acid	{[1-(2,4-二羟苯基)-3-(3,4-二羟苯基)-1-[3,5,7-三羟基-2-(3-羟基苯基)-3,4-二氢-2H-1-苯并吡喃-8-基]丙-2-基]氧基}磺酸	Organic acids	有机酸	Organic acids	有机酸	C30H28O13S	3	0.6173	-	18169.1	56747.6	38541.4	3958.03	2391.47	1306.35	1.38651	0.0862978	0.239252	14.8198	3.88945	up	-	-
MW0130254	2-(3-methoxyphenyl)-3,4-dihydro-2H-1-benzopyran-3,5,7-triol	2-(3-甲氧基苯基)-3，4-二氢-2H-1-苯并吡喃-3，5，7-三醇	Benzene and substituted derivatives	苯及其衍生物	Benzene and substituted derivatives	苯及其衍生物	C16H16O5	3	0.6171	-	24475.7	11770.2	20107.9	5059.13	3739.16	8506.28	1.27903	0.0585458	0.202273	3.25659	1.70336	up	-	-
MW0147815	Coumeroic acid	Coumeroic acid	Lignans and Coumarins	木脂素和香豆素	Coumarins	香豆素	C17H14N2O7	3	0.6162	-	220148	182197	170461	59557	69076.8	62228.8	1.43742	0.0114019	0.112902	3.00115	1.58551	up	C12478	-
MW0148716	dTDP-3-amino-2,3,6-trideoxy-C-methyl-D-erythro-hexopyranos-4-ulose	dTDP-3-氨基-2,3,6-丁氧基-C-甲基-D-赤型-己基吡喃并-4-ulose	Nucleotides and derivatives	核苷酸及其衍生物	Nucleotides and derivatives	核苷酸及其衍生物	C17H27N3O13P2	3	0.6142	-	39073.7	60710.5	39223	265023	238044	192274	1.426	0.00752738	0.10294	0.199912	-2.32256	down	C12319	ko01100,ko01110,ko01250
MW0158711	TyrMe-Ser-OH	TyrMe-Ser-OH	Amino acids and derivatives	氨基酸及其衍生物	Amino acids and derivatives	氨基酸及其衍生物	C19H20N2O8	3	0.6115	-	1.17815e+07	1.51909e+07	1.19378e+07	2.80592e+07	3.06459e+07	2.41512e+07	1.40297	0.00534667	0.099615	0.46961	-1.09046	down	-	-
MW0054723	Melibiitol	美立比醇	Others	其它类	Saccharides	糖类	C12H24O11	3	0.6109	-	26077	44044.7	32585.8	118703	79332.6	106160	1.37233	0.016012	0.124449	0.337637	-1.56645	down	C05399	ko00052
MW0136225	6-[2-[6-carboxy-5-(2,4-dihydroxyphenyl)-3-methylcyclohex-2-en-1-yl]-5-[(E)-2-(2,4-dihydroxyphenyl)ethenyl]-3-hydroxyphenoxy]-3,4,5-trihydroxyoxane-2-carboxylic acid	6-{2-[6-羧基-5-(2，4-二羟基苯基)-3-甲基环己-2-烯-1-基]-5-[（E)-2-(2，4-二羟基苯基）乙烯基]-3-羟基苯氧基}-3，4，5-三羟基氧烷-2-羧酸	Organic acids	有机酸	Organic acids	有机酸	C34H34O14	3	0.6069	-	9209.9	7907.89	3760.99	1585.86	3011.66	2103	1.23691	0.0945907	0.248039	3.11599	1.63969	up	-	-
MW0151212	HoPhe-Gly-OH	HoPhe-Gly-OH	Others	其它类	Lactones	内酯类化合物	C17H16N2O6	3	0.6041	-	34886.9	31514.9	33274.2	60077.3	62328.8	77198.4	1.42183	0.0221202	0.140919	0.499368	-1.00183	down	-	-
MW0109632	Ser-Pro-Arg	L-丝氨酰-L-脯氨酰-L-精氨酸	Amino acids and derivatives	氨基酸及其衍生物	Amino acids and derivatives	氨基酸及其衍生物	C14H26N6O5	3	0.6037	-	137793	267455	162201	26650.7	54302.1	37775.4	1.36908	0.0588505	0.202455	4.7794	2.25683	up	-	-
MW0132147	3,4,5-trihydroxy-6-{[5-hydroxy-2-(4-hydroxyphenyl)-4-oxo-6,8-bis[3,4,5-trihydroxy-6-(hydroxymethyl)oxan-2-yl]-4H-chromen-7-yl]oxy}oxane-2-carboxylic acid	3，4，5-三羟基-6-{[5-羟基-2-(4-羟基苯基)-4-氧代-6，8-双[3，4，5-三羟基-6-(羟甲基）恶烷-2-基]-4H-色烯-7-基]氧}恶烷-2-羧酸	Organic acids	有机酸	Organic acids	有机酸	C33H38O21	3	0.602	-	15205	16475	22072.2	2494.8	5851.23	5734.67	1.33727	0.0113588	0.112902	3.81744	1.9326	up	-	-
MW0129140	{2-hydroxy-4-[2-(2-hydroxyphenyl)ethyl]-6-methoxyphenyl}oxidanesulfonic acid	{2-羟基-4-[2-(2-羟基苯基）乙基]-6-甲氧基苯基}氧化磺酸	Organic acids	有机酸	Organic acids	有机酸	C15H16O7S	3	0.6004	-	27131.4	23865.1	19197.4	66256.8	55310.6	49379.4	1.40171	0.010206	0.111886	0.410619	-1.28413	down	-	-
MW0130495	2-[({3,4-dihydroxy-5-[2,4,5-trihydroxy-3-(3,4,5-trihydroxybenzoyloxy)benzoyloxy]phenyl}(hydroxy)methylidene)amino]acetic acid	2-[（{3，4-二羟基-5-[2，4，5-三羟基-3-(3，4，5-三羟基苯甲酰氧基）苯甲酰氧基]苯基}（羟基）亚甲基）氨基]乙酸	Organic acids	有机酸	Organic acids	有机酸	C23H17NO15	3	0.5994	-	63453.2	79691.2	71866.2	4843.33	436.92	8529	1.27863	0.00114156	0.0714974	15.57	3.9607	up	-	-
MW0152904	Lys-Asp-Leu-Glu	Lys-Asp-Leu-Glu	Amino acids and derivatives	氨基酸及其衍生物	Amino acids and derivatives	氨基酸及其衍生物	C21H37N5O9	3	0.5975	-	48037.5	49096.9	50212.2	154055	108492	132346	1.426	0.0242787	0.145009	0.37313	-1.42225	down	-	-
MW0141504	16beta-Hydroxy-1'H-5alpha-androstano[3,2-c]pyrazole-17-one	16beta-Hydroxy-1'H-5alpha-androstano[3,2-c]pyrazole-17-one	Lipids	脂质	Free fatty acids	游离脂肪酸	C20H28N2O2	3	0.597	-	22701.6	25800.8	8369.24	57788.7	44011.6	25154.3	1.03365	0.11617	0.275296	0.447968	-1.15853	down	-	-
MW0130245	2-(3-hydroxyphenyl)-4-[3,5,7-trihydroxy-2-(4-hydroxy-3-methoxyphenyl)-3,4-dihydro-2H-1-benzopyran-8-yl]-6-[3,4,5-trihydroxy-6-(hydroxymethyl)oxan-2-yl]-3,4-dihydro-2H-1-benzopyran-3,5,7-triol	2-(3-羟基苯基)-4-[3，5，7-三羟基-2-(4-羟基-3-甲氧基苯基)-3，4-二氢-2H-1-苯并吡喃-8-基]-6-[3，4，5-三羟基-6-(羟甲基）恶烷-2-基]-3，4-二氢-2H-1-苯并吡喃-3，5，7-三醇	Benzene and substituted derivatives	苯及其衍生物	Benzene and substituted derivatives	苯及其衍生物	C37H38O16	3	0.5962	-	14262.7	24917.4	15300.3	5827.46	8479.64	8116.59	1.30932	0.080148	0.231268	2.42959	1.28071	up	-	-
MW0134935	6-(3-{8-[2-(3,4-dihydroxyphenyl)-3,7-dihydroxy-3,4-dihydro-2H-1-benzopyran-4-yl]-3,5,7-trihydroxy-3,4-dihydro-2H-1-benzopyran-2-yl}phenoxy)-3,4,5-trihydroxyoxane-2-carboxylic acid	6-(3-{8-[2-(3,4-二羟苯基)-3,7-二羟基-3,4-二氢-2H-1-苯并吡喃-4-基]-3,5,7-三羟基-3,4-二氢-2H-1-苯并吡喃-2-基]苯氧基)-3,4,5-三羟基氧烷-2-羧酸	Organic acids	有机酸	Organic acids	有机酸	C36H34O16	3	0.5953	-	18695.1	8486.28	11998.4	28560.4	30916.3	25395.9	1.2714	0.0198693	0.136802	0.46163	-1.11519	down	-	-
MW0110204	Tyr-His-Arg	酪氨酸-组氨酸-精氨酸	Amino acids and derivatives	氨基酸及其衍生物	Amino acids and derivatives	氨基酸及其衍生物	C21H30N8O5	3	0.5918	-	47924.4	159126	113445	15729.6	33102.8	23405.2	1.26242	0.121086	0.279939	4.43669	2.14948	up	-	-
MW0112631	3,4,5-trihydroxy-6-{[5-hydroxy-2-(3-hydroxyphenyl)-3-[(3,4,5-trihydroxyoxan-2-yl)oxy]-5H-chromen-7-yl]oxy}oxane-2-carboxylic acid	3，4，5-三羟基-6-{[5-羟基-2-(3-羟基苯基)-3-[（3，4，5-三羟基恶烷-2-基）氧]-5H-色烯-7-基]氧}恶烷-2-羧酸	Organic acids	有机酸	Organic acids	有机酸	C26H27O15	3	0.5907	-	33564	36982.1	15629.8	98786.2	112201	109289	1.36334	0.00134058	0.0714974	0.269067	-1.89396	down	-	-
MW0134554	5-Hydroxy-7-[3,4,5-trihydroxy-6-(hydroxymethyl)oxan-2-yl]oxy-2-(3,4,5-trimethoxyphenyl)chromen-4-one	5-羟基-7-{[3，4，5-三羟基-6-(羟甲基）恶烷-2-基]氧}-2-(3，4，5-三甲氧基苯基)-4H-色烯-4-酮	Others	其它类	Ketone compounds	酮类化合物	C24H26O12	3	0.5901	-	14835.3	22122.7	21388.2	9642.93	10108	5941.3	1.30778	0.0238256	0.143893	2.27097	1.18331	up	-	-
MW0150473	Gly-Pro-Trp	甘氨酸-脯氨酸-色氨酸	Amino acids and derivatives	氨基酸及其衍生物	Amino acids and derivatives	氨基酸及其衍生物	C18H22N4O4	3	0.5892	-	98923.8	85126.7	87203.6	196672	157542	223167	1.40056	0.0282279	0.151946	0.469801	-1.08988	down	-	-
MW0134951	6-(4,5-dihydroxy-2-{5-hydroxy-7-methoxy-4-oxo-6-[3,4,5-trihydroxy-6-(hydroxymethyl)oxan-2-yl]-4H-chromen-2-yl}phenoxy)-3,4,5-trihydroxyoxane-2-carboxylic acid	6-(4，5-二羟基-2-{5-羟基-7-甲氧基-4-氧代-6-[3，4，5-三羟基-6-(羟甲基）恶烷-2-基]-4H-色烯-2-基}苯氧基)-3，4，5-三羟基恶烷-2-羧酸	Organic acids	有机酸	Organic acids	有机酸	C28H30O18	3	0.5885	-	119400	79849.1	121513	492.64	331.88	21510.2	1.22975	0.00730711	0.10294	14.3616	3.84414	up	-	-
MW0114285	Dimethyl 2-galloylgalactarate	2-没食子酰半乳酸二甲酯	Others	其它类	Lactones	内酯类化合物	C15H18O12	3	0.5863	-	1257.64	4192.66	7696.35	21613.5	28051.5	18695.8	1.25124	0.00766184	0.10294	0.192313	-2.37847	down	-	-
MW0136238	6-{3,4-dihydroxy-5-[2,4,5-trihydroxy-3-(3,4,5-trihydroxybenzoyloxy)benzoyloxy]benzoyloxy}-3,4,5-trihydroxyoxane-2-carboxylic acid	6-{3，4-二羟基-5-[2，4，5-三羟基-3-(3，4，5-三羟基苯甲酰氧基）苯甲酰氧基]苯甲酰氧基}-3，4，5三羟基恶烷-2-羧酸	Organic acids	有机酸	Organic acids	有机酸	C27H22O20	3	0.5851	-	19844.4	42462.4	46083.1	2766.28	986.75	5751.67	1.3375	0.0531652	0.193466	11.4038	3.51144	up	-	-
MW0132101	3,4,5-Trihydroxy-6-[4-hydroxy-2-oxo-3-(3-oxo-1-phenylbutyl)chromen-7-yl]oxyoxane-2-carboxylic acid	3,4,5-三羟基-6-{[4-羟基-2-氧代-3-(3-氧代-1-苯基丁基)-2H-铬-7-基]氧基}氧烷-2-羧酸	Organic acids	有机酸	Organic acids	有机酸	C25H24O11	3	0.5838	-	52327.5	42423.6	44659.5	7636.42	167.45	3620.39	1.19677	0.000539975	0.0659656	12.203	3.60917	up	-	-
MW0057610	PC(22:5(7Z,10Z,13Z,16Z,19Z)/15:0)	PC(22:5(7Z,10Z,13Z,16Z,19Z)/15:0)	GP	甘油磷脂类	PC	磷脂酰胆碱	C45H80NO8P	3	0.5831	-	14691.4	28628.1	19125.8	8869.95	5994.21	1295.27	1.15969	0.0441106	0.180086	3.86432	1.95022	up	C00157	ko00564,ko00590,ko00591,ko00592,ko01100,ko01110
MW0112686	3,4,5-trihydroxy-6-{4-[3-(5-methoxy-2,2-dimethyl-2H-chromen-6-yl)oxirane-2-carbonyl]phenoxy}oxane-2-carboxylic acid	3,4,5-三羟基-6- {4- [3-(5-甲氧基-2,2-二甲基-2H-铬6-基）环氧乙烷-2-羰基]苯氧基}环氧乙烷-2-羧酸	Organic acids	有机酸	Organic acids	有机酸	C27H28O11	3	0.581	-	23233.6	33882.5	37471.5	3357.64	5003.5	16354.8	1.22767	0.0170491	0.128006	3.827	1.93621	up	-	-
MW0057434	PC(20:5(5Z,8Z,11Z,14Z,17Z)/22:5(4Z,7Z,10Z,13Z,16Z))	PC(20:5(5Z,8Z,11Z,14Z,17Z)/22:5(4Z,7Z,10Z,13Z,16Z))	GP	甘油磷脂类	PC	磷脂酰胆碱	C50H80NO8P	3	0.5793	-	94215.8	117563	80746.6	844531	671790	303284	1.36392	0.0851917	0.237517	0.160763	-2.63699	down	-	-
MW0126782	Pictilisib	Pictilisib	Heterocyclic compounds	杂环化合物	Heterocyclic compounds	杂环化合物	C23H27N7O3S2	3	0.5782	-	3076.71	1423.4	3599.92	8202.69	20154.3	8760.02	1.28412	0.127292	0.288302	0.21823	-2.19608	down	-	-
MW0135786	6-{[2-(3,4-dihydroxyphenyl)-4-[2-(3,4-dihydroxyphenyl)-3,5,7-trihydroxy-3,4-dihydro-2H-1-benzopyran-8-yl]-3,5-dihydroxy-6-[3,4,5-trihydroxy-6-(hydroxymethyl)oxan-2-yl]-3,4-dihydro-2H-1-benzopyran-7-yl]oxy}-3,4,5-trihydroxyoxane-2-carboxylic acid	6-{[2-(3，4-二羟基苯基)-4-[2-(3，4-二羟基苯基)-3，5，7-三羟基-3，4-二氢-2H-1-苯并吡喃-8-基]-3，5-二羟基-6-[3，4，5-三羟基-6-(羟甲基）恶烷-2-基]-3，4-三氢-2H-1-苯并吡喃-7-基]氧基}-3，4，5-三羟基恶烷-2-羧酸	Organic acids	有机酸	Organic acids	有机酸	C42H44O23	3	0.5692	-	28916.7	23438.8	9256.97	190842	293529	164253	1.39563	0.0357919	0.164313	0.0949896	-3.39609	down	-	-
MW0150569	Glycopeptide	糖肽	Amino acids and derivatives	氨基酸及其衍生物	Amino acids and derivatives	氨基酸及其衍生物	C36H64N8O17	3	0.5685	-	333233	376556	325537	117715	132127	207593	1.3395	0.00785364	0.10294	2.26333	1.17845	up	C00528	-
MW0132496	3,4,5-trihydroxy-6-{4-[5,6,7-trihydroxy-4-oxo-8-(3,4,5-trihydroxyoxan-2-yl)-4H-chromen-2-yl]phenoxy}oxane-2-carboxylic acid	3，4，5-三羟基-6-{4-[5，6，7-三羟基-4-氧代-8-(3，4，5-三羟基恶烷-2-基)-4H-苯并吡喃-2-基]苯氧基}恶烷-2-羧酸	Organic acids	有机酸	Organic acids	有机酸	C26H26O16	3	0.5577	-	58558.8	57824.1	67248.4	3602.53	1506.09	14740.5	1.30258	0.00066574	0.0671529	9.25136	3.20967	up	-	-
MW0154308	Naringin chalcone	柚皮苷查尔酮	Others	其它类	Ketone compounds	酮类化合物	C27H32O14	3	0.5525	-	955.33	4604.01	1114.76	3456.13	51397.4	11406.5	1.07761	0.312218	0.477636	0.100726	-3.31149	down	-	-
MW0131775	3,4,5-trihydroxy-6-[(7-hydroxy-4-oxo-3-{[3,4,5-trihydroxy-6-(hydroxymethyl)oxan-2-yl]oxy}-2-(3,4,5-trihydroxyphenyl)-4H-chromen-5-yl)oxy]oxane-2-carboxylic acid	3，4，5-三羟基-6-[（7-羟基-4-氧代-3-{[3，4，5-三羟基-6-(羟甲基）恶烷-2-基]氧基}-2-(3，5，5-三羟基苯基)-4H-苯并吡喃-5-基）氧基]恶烷-2-羧酸	Organic acids	有机酸	Organic acids	有机酸	C27H28O19	3	0.5485	-	3820.9	3818.46	7219.54	7112.07	23416.1	22374.2	1.17108	0.132232	0.293007	0.280874	-1.832	down	-	-
MW0103413	6-Mercaptopurine ribonucleoside 5'-diphosphate	6-巯基嘌呤核苷5-二磷酸	Nucleotides and derivatives	核苷酸及其衍生物	Nucleotides and derivatives	核苷酸及其衍生物	C10H14N4O10P2S	3	0.5473	-	21329.9	6536.36	11263.4	393.92	491.89	7417.35	1.0974	0.127627	0.288446	4.71262	2.23653	up	C16616	-
MW0136155	6-[2-[2-(2,4-Dihydroxyphenyl)-2-oxoethyl]-5-hydroxy-3-methoxy-4-(3-methylbut-2-enyl)phenoxy]-3,4,5-trihydroxyoxane-2-carboxylic acid	6-{2-[2-(2，4-二羟基苯基)-2-氧代乙基]-5-羟基-3-甲氧基-4-(3-甲基丁-2-烯-1-基）苯氧基}-3，4，5-三羟基恶烷-2-羧酸	Organic acids	有机酸	Organic acids	有机酸	C26H30O12	3	0.5447	-	2.11307e+07	2.43428e+07	2.60671e+07	1.11821e+07	1.1398e+07	1.0557e+07	1.44241	0.010733	0.112223	2.15893	1.11032	up	-	-
MEDN1405	Indole-3-acetic acid ethyl ester	3-吲哚乙酸乙酯	Alkaloids	生物碱	Plumerane	吲哚类生物碱	C12H13NO2	3	0.5443	-	535011	484803	468962	107933	152898	179706	1.41093	0.0002721	0.0659656	3.37946	1.75679	up	-	-
MW0161388	Mycothiol-bimane conjugate	Mycothiol-bimane 缀合物	Alcohol and amines	醇、胺类	Amines	胺类	C27H40N4O14S	3	0.5442	-	1431.13	1491.43	761.8	5376.98	2444.46	2573.98	1.21849	0.137496	0.299663	0.354421	-1.49646	down	-	-
MW0104915	3,4-Dihydroxy-5-sulooxycyclohexene-1-carboxylic acid	3，4-二羟基-5-(磺氧基）环己-1-烯-1-羧酸	Organic acids	有机酸	Organic acids	有机酸	C7H10O8S	3	0.5399	-	25563.5	26198.1	17243.4	6923.66	4564.2	5552.78	1.41091	0.0218111	0.140802	4.04944	2.01772	up	-	-
MW0149497	GDP-4-oxo-L-rhamnose	GDP-4-脱氢-6-脱氧-L-甘露糖；GDP-4-氧代-6-脱氧-L-甘露糖；GDP-4-氧代-L-鼠李糖	Nucleotides and derivatives	核苷酸及其衍生物	Nucleotides and derivatives	核苷酸及其衍生物	C16H23N5O15P2	3	0.5387	-	417536	635775	716334	185179	191778	250773	1.37263	0.0445705	0.180429	2.81912	1.49524	up	C05344	-
MW0012363	(5Z,8Z,11Z,14S,15R)-14,15-dihydroxyicosa-5,8,11-trienoic acid?	(5Z,8Z,11Z,14S,15R)-14,15-dihydroxyicosa-5,8,11-trienoic acid?	Lipids	脂质	Free fatty acids	游离脂肪酸	C20H34O4	3	0.5377	-	32804.2	18793.3	20686.3	98550.2	51876.9	44813.6	1.2413	0.127838	0.288446	0.37023	-1.43351	down	-	-
MW0140467	(R)-NADPHX	(R)-NADPHX	Nucleotides and derivatives	核苷酸及其衍生物	Nucleotides and derivatives	核苷酸及其衍生物	C21H32N7O18P3	3	0.5377	-	353.55	302.13	624.55	564.42	1450.96	1423.22	1.14017	0.120208	0.279161	0.372311	-1.42542	down	C20483	-
MW0128584	[2,6-dihydroxy-3-(7-hydroxy-4-oxo-4H-chromen-2-yl)phenyl]oxidanesulfonic acid	[2，6-二羟基-3-(7-羟基-4-氧代-4H-苯并吡喃-2-基）苯基]氧代磺酸	Organic acids	有机酸	Organic acids	有机酸	C15H10O9S	3	0.533	-	1970.33	4199.87	3613.54	1269.12	1144.35	705.75	1.30303	0.0715021	0.21957	3.1366	1.6492	up	-	-
MW0112488	3,4,5-trihydroxy-6-[2-methoxy-4-(3-oxobut-1-en-1-yl)phenoxy]oxane-2-carboxylic acid	[2-甲氧基-4-(3-氧代丁基-1-烯-1-基）苯基]氧化磺酸	Benzene and substituted derivatives	苯及其衍生物	Benzene and substituted derivatives	苯及其衍生物	C17H20O9	3	0.532	-	50270.6	53479.6	55508.7	25675	19841.2	32135.7	1.36233	0.00812024	0.103511	2.05093	1.03628	up	-	-
MW0136345	6-{4-[(1E)-3-{3-[5-(2,4-dihydroxyphenyl)-6-(5-hydroxy-2,2-dimethyl-2H-chromene-6-carbonyl)-3-methylcyclohex-2-en-1-yl]-2,4-dihydroxyphenyl}-3-oxoprop-1-en-1-yl]-3-hydroxyphenoxy}-3,4,5-trihydroxyoxane-2-carboxylic acid	6-{4-[（1E)-3-{3-[5-(2，4-二羟基苯基)-6-(5-羟基-2，2-二甲基-2H-苯并吡喃-6-羰基)-3-甲基环己-2-烯-1-基]-2，4-二羟基苯基}-3-氧代丙-1-烯-1-基]-3-羟基苯氧基}-3，4，5-三羟基恶烷-2-羧酸	Organic acids	有机酸	Organic acids	有机酸	C46H44O16	3	0.5222	-	3700.05	711.68	2174.82	12249.4	13820.3	4847.45	1.18997	0.0882377	0.241405	0.213038	-2.23081	down	-	-
MW0013910	3-Acetoxypregn-16-en-12,20-dione	3-ACETOXYPREGN-16-EN-12,20-DIONE	Others	其它类	Ketone compounds	酮类化合物	C23H32O4	3	0.5194	-	207.21	779.91	325	11809.2	15709.4	16393	1.425	0.00915914	0.107897	0.0298809	-5.06463	down	-	-
MW0135808	6-{[2-(3,4-dihydroxyphenyl)-5-hydroxy-4-oxo-8-(3,4,5-trihydroxyoxan-2-yl)-4H-chromen-7-yl]oxy}-3,4,5-trihydroxyoxane-2-carboxylic acid	6-{[2-(3，4-二羟基苯基)-5-羟基-4-氧代-8-(3，4，5-三羟基恶烷-2-基)-4H-苯并吡喃-7-基]氧}-3，4，5-三羟基恶烷-2-羧酸	Organic acids	有机酸	Organic acids	有机酸	C26H26O16	3	0.5182	-	2352.98	6062.57	7195.17	844.24	626.8	1921.47	1.24169	0.0993858	0.254077	4.60153	2.20211	up	-	-
MW0113678	6-{[4,5-dihydroxy-6-(hydroxymethyl)-2-{1,2,6-trihydroxy-3-[hydroxy(3,4,5-trihydroxyoxan-2-yl)methyl]-4-oxocyclohexa-2,5-dien-1-yl}oxan-3-yl]oxy}-3,4,5-trihydroxyoxane-2-carboxylic acid	3，4，5-三羟基-6-[（3，4，5-三羟基-6-{1，2，6-三羟基-3-[羟基（3，5，-三羟基恶烷-2-基）甲基]-4-氧代环己-2，5-二烯-1-基}恶烷-2-基）甲氧基]恶烷-2	Benzene and substituted derivatives	苯及其衍生物	Benzene and substituted derivatives	苯及其衍生物	C24H34O20	3	0.5148	-	59782.3	39484	60000	3490.13	1929.81	39035.5	1.08695	0.0668303	0.213122	3.5826	1.84101	up	-	-
MW0132479	3,4,5-trihydroxy-6-{4-[1-hydroxy-3-(5-methoxy-2,2-dimethyl-2H-chromen-6-yl)propyl]phenoxy}oxane-2-carboxylic acid	3,4,5-三羟基-6- {4- [1-羟基-3-(5-甲氧基-2,2-二甲基-2H-铬6-基）丙基]苯氧基}氧烷-2-羧酸	Organic acids	有机酸	Organic acids	有机酸	C27H32O10	3	0.5147	-	9858.21	4223.97	3361.84	8886.87	10687.8	15621.9	1.08419	0.107702	0.266526	0.495617	-1.0127	down	-	-
MW0049813	1-Hexadecanoyl-2-eicosanoyl-sn-glycerol	1-Hexadecanoyl-2-eicosanoyl-sn-glycerol	GL	甘油脂类	DG	甘油二酯	C39H76O5	3	0.512	-	120942	102986	164564	323.68	11910	5711.04	1.2563	0.0185122	0.132677	21.6494	4.43626	up	-	-
MW0128124	(3-{8-[1-(2,4-dihydroxyphenyl)-2-hydroxy-3-(3-hydroxyphenyl)propyl]-3,5,7-trihydroxy-3,4-dihydro-2H-1-benzopyran-2-yl}phenyl)oxidanesulfonic acid	（3-{8-[1-(2,4-二羟苯基)-2-羟基-3-(3-羟基苯基）丙基]-3,5,7-三羟基-3,4-二氢-2H-1-苯并吡喃-2-基]苯基）氧化磺酸	Organic acids	有机酸	Organic acids	有机酸	C30H28O12S	3	0.5107	-	38004.5	14597.6	27841.1	88290.2	94648.6	100054	1.34539	0.00320264	0.0850936	0.284259	-1.81472	down	-	-
MW0154237	N-Acetyl-leu-leu-tyr-amide	N-乙酰基-Leu-Leu-Tyr-酰胺；NaC-乙酰胺	Alcohol and amines	醇、胺类	Amines	胺类	C23H36N4O5	3	0.5086	-	368911	401495	186117	5396.07	415.45	164096	1.06157	0.0403269	0.171982	5.62966	2.49305	up	C11297	-
MW0144702	Ala-Phe-Tyr-Arg	Ala-Phe-Tyr-Arg	Amino acids and derivatives	氨基酸及其衍生物	Amino acids and derivatives	氨基酸及其衍生物	C27H37N7O6	3	0.5051	-	1520.88	2235.31	226.82	16134.2	15475.7	5816.43	1.24593	0.074842	0.224068	0.106423	-3.23212	down	-	-
MW0011054	(2E,6E,11E,13E)-18-(2,6-dioxopiperidin-4-yl)-9-hydroxy-8-methoxy-10,12,14-trimethyl-15-oxooctadeca-2,6,11,13-tetraenoic acid	(2E,6E,11E,13E)-18-(2,6-dioxopiperidin-4-yl)-9-hydroxy-8-methoxy-10,12,14-trimethyl-15-oxooctadeca-2,6,11,13-tetraenoic acid	FA	脂肪酰类	Others	其它	C27H39NO7	3	0.5033	-	2664.63	7586.87	11370.3	19239.7	19332.9	22342.9	1.16835	0.0227533	0.142669	0.354947	-1.49432	down	-	-
MW0113506	6-[4-(2-{[2-(3,4-dimethoxyphenyl)ethyl]-C-hydroxycarbonimidoyl}ethyl)-2-methoxyphenoxy]-3,4,5-trihydroxyoxane-2-carboxylic acid	6-[4-(2-{[2-(3,4-二甲氧基苯基）乙基]-C-羟基碳酰亚胺基}乙基)-2-甲氧基苯氧基]-3,4,5-三羟基氧烷-2-羧酸	Organic acids	有机酸	Organic acids	有机酸	C26H33NO11	3	0.5014	-	16775.2	17751.5	36544.4	11288.6	6010.02	9018.58	1.23662	0.139774	0.302946	2.70056	1.43326	up	-	-
