# Supplementary material
Source: Research Square preprint supplement (doi:10.21203/rs.3.rs-9628093/v1)
Supplement: Supplementary file 4 [file be9b8e40b3e569684c7e116c.xlsx]

## Sheet: Sheet1
Index	Compounds	物质	Class I	物质一级分类	Class II	物质二级分类	Formula	Level	score	CAS	DNPP-1	DNPP-2	DNPP-3	DNP-1	DNP-2	DNP-3	VIP	P-value	FDR	Fold_Change	Log2FC	Type	cpd_ID	kegg_map
MW0137454	Avenanthramide A	燕麦蒽酰胺 A	Alkaloids	生物碱	Phenolamine	酚胺	C16H13NO5	2	0.9196	108605-70-5	25150.3	24329.6	23862.3	43451.7	41262.3	62523.2	1.34609	0.0671651	0.202105	0.498123	-1.00543	down	C08472	-
MW0006649	Convoline	康沃林	Others	其它类	Lactones	内酯类化合物	C16H21NO5	2	0.883	89783-61-9	11409.3	6887.56	4977.85	17355.1	19369.1	14325.7	1.23475	0.0206297	0.125682	0.455922	-1.13314	down	C10855	-
MEDP0338	LysoPC 16:0	溶血磷脂酰胆碱 16:0	Lipids	脂质	LPC	溶血磷脂酰胆碱	C24H50NO7P	2	0.8559	17364-16-8	15472.5	19176.6	16998.2	35834.2	35140.4	40372.8	1.41566	0.00109183	0.0554745	0.463839	-1.1083	down	C04230	ko00564
MADN0564	2-Pyrimidineacetic acid	2-嘧啶乙酸	Heterocyclic compounds	杂环化合物	Heterocyclic compounds	杂环化合物	C6H6N2O2	2	0.8528	66621-73-6	16959.4	19253	15005.2	2294.33	1630.18	5995.36	1.31833	0.00174218	0.0620995	5.16313	2.36825	up	-	-
MW0126762	Thiamine phosphoric acid ester	硫胺素单磷酸盐	Organic acids	有机酸	Organic acids	有机酸	C12H17N4O4PS	2	0.8457	495-23-8	23567.1	16570	25143.6	11773.4	1318.69	745.16	1.15265	0.0213627	0.126559	4.71776	2.2381	up	-	-
MW0012269	13(S)-Hydroperoxylinolenic acid	13-氢过氧化-9Z,11E,15Z-十八碳三烯酸	Lipids	脂质	Free fatty acids	游离脂肪酸	C18H30O4	2	0.8274	67597-26-6	23566.1	53238.4	46315.2	98967.3	125049	524561	1.16128	0.268983	0.425319	0.164472	-2.60409	down	C04785	ko00592,ko01100,ko01110
MW0062178	Pristanic acid	Pristanic acid	Terpenoids	萜类	Ditepenoids	二萜	C19H38O2	2	0.8172	1189-37-3	14848.2	21254.5	27175.4	7952.11	7310.22	7199.03	1.3638	0.0615328	0.191671	2.8172	1.49426	up	-	-
MW0015643	Alloxanthin	四黄素	Alcohol and amines	醇、胺类	Alcohols	醇类	C40H52O2	2	0.8012	28380-31-6	14495.7	11543.6	3141.26	38897.8	45889.4	55328.3	1.26645	0.00446134	0.0743943	0.208261	-2.26354	down	-	-
MW0108512	N-[(3s)-2-Oxotetrahydrofuran-3-Yl]hexanamide	N-己酰基-L-高丝氨酸内酯	Others	其它类	Lactones	内酯类化合物	C10H17NO3	2	0.7997	147852-83-3	17370.3	9990.03	9683.05	50852.2	33144.8	46097.7	1.35933	0.0148351	0.110312	0.284741	-1.81228	down	C21197	-
MW0107797	Leu-Ile	亮氨酸异亮氨酸	Amino acids and derivatives	氨基酸及其衍生物	Amino acids and derivatives	氨基酸及其衍生物	C12H24N2O3	2	0.7968	36077-41-5 | 91605-03-7	1008.14	1296.95	2383.46	73769.4	45658.1	346788	1.3767	0.250331	0.407745	0.0100566	-6.63571	down	-	-
MW0104181	3-Oxoglutaric acid	1,3-丙酮二甲酸	Organic acids	有机酸	Organic acids	有机酸	C5H6O5	2	0.7915	542-05-2	9631.01	10774.5	17425.2	1997.58	2735.18	2267.26	1.40378	0.0505977	0.176982	5.40436	2.43412	up	-	-
MW0011930	1,2-Dimyristoyl-sn-glycero-3-phosphocholine	1,2-二十四烷酰基-sn-甘油-3-磷酸胆碱	GP	甘油磷脂类	PC	磷脂酰胆碱	C36H72NO8P	2	0.7886	18194-24-6	139572	258546	79624	25929.7	51611.2	39990.8	1.23391	0.147296	0.304569	4.0648	2.02318	up	-	-
MEDP0362	D-(+)-Neopterin	新蝶呤	Alkaloids	生物碱	Alkaloids	生物碱	C9H11N5O4	2	0.7878	2009-64-5	309349	270918	205150	30351.1	80486.4	52416	1.34756	0.00986675	0.0946556	4.81103	2.26635	up	C05926	ko00790
MW0110760	2S-Amino-4E-pentadecene-1,3R-diol	2S-氨基-4E-十五碳烯-1,3R-二醇	Alcohol and amines	醇、胺类	Alcohols	醇类	C15H31NO2	2	0.7842	86555-28-4	1717.56	1450.39	1162.94	112467	147859	129484	1.44059	0.00625559	0.0818674	0.0111103	-6.49196	down	-	-
MEDN1108	Levoglucosan	1,6-脱水-β-D-葡萄糖	Others	其它类	Saccharides	糖类	C6H10O5	2	0.7838	498-07-7	200254	112813	97060.8	77112	65095.6	39857	1.15477	0.130129	0.284543	2.25265	1.17162	up	-	-
MEDTP00538	3-Oxo-octanoic acid (2-oxo-tetrahydro-furan-3-YL)-amide	N-3-氧代辛酰基-L-高丝氨酸内酯	Amino acids and derivatives	氨基酸及其衍生物	Amino acids and derivatives	氨基酸及其衍生物	C12H19NO4	2	0.7785	147795-39-9	1.58261e+06	1.81289e+06	1.75539e+06	3.38e+06	4.68493e+06	4.10442e+06	1.40215	0.0220867	0.128498	0.423268	-1.24036	down	-	-
MEDN1744	3-Methoxysalicylic acid	3-甲氧基水杨酸	Benzene and substituted derivatives	苯及其衍生物	Benzene and substituted derivatives	苯及其衍生物	C8H8O4	2	0.7777	877-22-5	3049.63	3059.91	1774.51	15226.1	18048.2	3540.42	1.12463	0.160877	0.320196	0.214155	-2.22327	down	-	-
pme0376	Naringenin	柚皮素	Flavonoids	黄酮	Flavanones	二氢黄酮	C15H12O5	2	0.7774	480-41-1	4339.54	4236.3	6438.85	15536.3	17993.7	5232.43	1.02379	0.176535	0.33612	0.387352	-1.36828	down	C00509	ko00941,ko00943,ko01100,ko01110
MW0123058	Benzimidazole	苯并咪唑	Benzene and substituted derivatives	苯及其衍生物	Benzene and substituted derivatives	苯及其衍生物	C7H6N2	2	0.7761	51-17-2	4785.71	4233.77	743.03	23008.6	30459.5	20806	1.2788	0.00891759	0.0903329	0.131439	-2.92754	down	C02009	-
MW0106770	gamma-Glutamylglutamate	γ-谷氨酰谷氨酸	Amino acids and derivatives	氨基酸及其衍生物	Amino acids and derivatives	氨基酸及其衍生物	C10H16N2O7	2	0.7761	1116-22-9	63221.2	37220.8	57680.5	20592.3	14215.9	18414.8	1.35623	0.0412655	0.161339	2.97094	1.57092	up	C05282	-
MW0122042	6-Butyltetrahydro-2H-pyran-2-one	6-丁基四氢-2H-吡喃-2-酮	Others	其它类	Ketone compounds	酮类化合物	C9H16O2	2	0.775	3301-94-8	16625.5	19430.5	15304.2	55644.7	43796.1	195781	1.22941	0.237679	0.395577	0.173971	-2.52308	down	-	-
MEDL00438	1,4-Dihydroxy-2-naphthoic acid	1,4-二羟基-2-萘甲酸	Benzene and substituted derivatives	苯及其衍生物	Benzene and substituted derivatives	苯及其衍生物	C11H8O4	2	0.7732	31519-22-9	66159.9	55734.7	131431	63698.1	33255.1	25168.5	1.01167	0.198889	0.359597	2.07437	1.05267	up	C03657	ko00130,ko01100,ko01110,ko01240
MW0119221	3',5'-Cyclic dAMP	3'，5'-环-2'-脱氧腺苷单磷酸	Nucleotides and derivatives	核苷酸及其衍生物	Nucleotides and derivatives	核苷酸及其衍生物	C10H12N5O5P	2	0.7728	1157-33-1	25875.1	27660.2	25516	47450.3	53798.8	66822.3	1.39153	0.0335065	0.149634	0.470344	-1.08821	down	C00968	-
MW0113071	4-Hydroxy-4-methyl-5-hexenoic acid gamma lactone	4-羟基-4-甲基-5-己烯酸γ-内酯	Others	其它类	Others	其它	C7H10O2	2	0.7722	1073-11-6	33931.8	40031	39858.3	85235.1	94754	65335.5	1.37075	0.0315098	0.146498	0.463961	-1.10792	down	-	-
MW0009430	Phenylpropiolic acid	苯丙酸	Benzene and substituted derivatives	苯及其衍生物	Benzene and substituted derivatives	苯及其衍生物	C9H6O2	2	0.7698	637-44-5	201030	295852	261108	601159	736751	982545	1.37058	0.0364655	0.154883	0.326656	-1.61416	down	-	-
MW0124614	Kahweol	桂月	Heterocyclic compounds	杂环化合物	Heterocyclic compounds	杂环化合物	C20H26O3	2	0.7684	6894-43-5	32449.8	36024.5	26487.8	10888.5	11960	17947.4	1.32998	0.00805569	0.0865241	2.32774	1.21893	up	-	-
MW0139541	3-[(2S,3R,4S,5S,6R)-4,5-dihydroxy-6-(hydroxymethyl)-3-[(2S,3R,4R,5R,6S)-3,4,5-trihydroxy-6-methyloxan-2-yl]oxyoxan-2-yl]oxy-2-(3,4-dihydroxyphenyl)-5-hydroxy-7-[(2S,3R,4R,5R,6S)-3,4,5-trihydroxy-6-methyloxan-2-yl]oxychromen-4-one	3-[(2S,3R,4S,5S,6R)-4,5-二羟基-6-(羟甲基)-3-[(2S,3R,4R,5R,6S)-3,4,5-三羟基- 6-methyloxan-2-yl]oxyoxan-2-yl]oxy-2-(3,4-dihydroxyphenyl)-5-hydroxy-7-[(2S,3R,4R,5R,6S)-3,4,5 -trihydroxy-6-methyloxan-2-yl]oxychromen-4-one	Flavonoids	黄酮	Flavones	黄酮	C33H40O20	2	0.767	161993-01-7	82919.5	27542.5	22043.8	104918	82538.2	83972.3	1.05864	0.12761	0.281824	0.488179	-1.03452	down	-	-
MW0146360	Asp-Lys	L-天冬氨酰-L-赖氨酸	Amino acids and derivatives	氨基酸及其衍生物	Amino acids and derivatives	氨基酸及其衍生物	C10H19N3O5	2	0.7665	5891-51-0	114353	102645	61632.6	32667.8	46759.9	48090.7	1.23175	0.0766799	0.214545	2.18503	1.12765	up	-	-
MW0012930	Hexanolamino PAF C-16	己醇氨基PAF C-16	GP	甘油磷脂类	PC	磷脂酰胆碱	C30H62NO7P	2	0.7664	137566-83-7	4948.11	6878.96	2338.22	11923	15712.8	24395.8	1.26212	0.0625595	0.193316	0.272244	-1.87703	down	-	-
MW0115743	11-Hydroxytetrahydrocannabinol	11-羟基-Δ9-四氢大麻酚	Others	其它类	Others	其它	C21H30O3	2	0.7662	36557-05-8	4256.37	1708.29	1331.82	35754.6	44986.9	39239.3	1.40328	0.0024077	0.0669726	0.0608137	-4.03946	down	-	-
MW0152081	Lacto-N-triaose	乳-N-三糖	Others	其它类	Saccharides	糖类	C20H35NO16	2	0.7661	75645-27-1	70361.1	83100.3	82358.3	138855	126185	304987	1.17642	0.192232	0.352381	0.413699	-1.27335	down	-	-
MW0109628	Ser-Met-Arg	丝氨酸-精氨酸	Amino acids and derivatives	氨基酸及其衍生物	Amino acids and derivatives	氨基酸及其衍生物	C14H28N6O5S	2	0.7646	189342-36-7	91314	38447.2	40406.3	18770.3	15135.8	11294.4	1.28735	0.135718	0.29097	3.76473	1.91255	up	-	-
MW0007411	Isoeugenyl acetate	乙酰异丁香酚	Phenolic acids	酚酸类	Phenolic acids	酚酸类	C12H14O3	2	0.7642	93-29-8	30402.1	49756.6	44438	18659.1	12125.8	17621.4	1.32833	0.036285	0.154883	2.57398	1.364	up	-	-
MW0010577	2,3-Bis(1,3-benzodioxol-5-ylmethyl)butane-1,4-diol	2,3-双(1,3-benzodioxol-5-ylmethyl)butane-1,4-diol	Lignans and Coumarins	木脂素和香豆素	Lignans	木脂素	C20H22O6	2	0.7632	24563-03-9	2.02491e+06	1.18156e+06	1.47716e+06	585515	609361	621149	1.36478	0.0605266	0.189887	2.57906	1.36685	up	C10558	-
MW0103327	2-Aminoadenosine	2-氨基腺苷	Nucleotides and derivatives	核苷酸及其衍生物	Nucleotides and derivatives	核苷酸及其衍生物	C10H14N6O4	2	0.763	2096-10-8	20773	35286.2	29130.6	57350.7	58425	57814.3	1.3282	0.0193077	0.123295	0.490753	-1.02693	down	C00939	-
MW0126037	Papaverine	罂粟碱	Alkaloids	生物碱	Isoquinoline alkaloids	异喹啉类生物碱	C20H21NO4	2	0.7625	61-25-6	135658	108519	204410	38949.8	17004.6	45256.4	1.31167	0.0459807	0.170446	4.43221	2.14802	up	C06533	ko00950,ko01110
MW0130123	Dihydroquercetin	2-(3，4-二羟基苯基)-3，5，7-三羟基-3，4-二氢-2H-1-苯并吡喃-4-酮	Others	其它类	Ketone compounds	酮类化合物	C15H12O7	2	0.7609	98006-93-0 | 215257-15-1 | 5117-01-1	99079.5	191268	173712	61540	85324.6	58612.9	1.23988	0.0823208	0.22366	2.25845	1.17533	up	-	-
MW0122604	8-Deoxylactucin	8-去氧山莴苣素	Terpenoids	萜类	Sesquiterpenoids	倍半萜	C15H16O4	2	0.7608	65725-10-2	338592	299418	190286	111735	106670	61796.2	1.29963	0.0417261	0.162231	2.95607	1.56368	up	C09392	-
MW0012952	1-O-Octadecyl-SN-glycero-3-phosphocholine	1-O-十八烷基-sn-甘油基-3-磷酸胆碱	GP	甘油磷脂类	PC	磷脂酰胆碱	C26H56NO6P	2	0.7598	74430-89-0	15959.2	14433.6	12479	40217.3	51694.9	52792.2	1.42018	0.010189	0.0959058	0.296272	-1.75501	down	C04317	ko00565,ko01100
MW0012936	1-Oleoyl-2-acetyl-sn-glycerol	1-油酰基-2-乙酰基-sn-甘油	GL	甘油脂类	DG	甘油二酯	C23H42O5	2	0.7596	86390-77-4 | 92282-11-6	19934.3	28667.1	31300.9	100674	98088.9	64587.8	1.36543	0.0264244	0.1373	0.303406	-1.72068	down	-	-
MW0138262	Glabranin	光甘草宁	Flavonoids	黄酮	Flavanones	二氢黄酮	C20H20O4	2	0.7592	41983-91-9	23264.4	10495.1	18465.4	9410.95	10922.6	5594.21	1.07014	0.128794	0.282823	2.01425	1.01024	up	C09752	-
MW0137985	Dihydrosamidin	Dihydrosamidin(Corymbocoumarin)(Suksdorfin)	Lignans and Coumarins	木脂素和香豆素	Coumarins	香豆素	C21H24O7	2	0.7585	6005-18-1 | 4992-73-8	2578.38	4685.29	2870.6	11490.2	7073.99	8356.95	1.30683	0.0327055	0.148547	0.376442	-1.4095	down	C09260	-
MW0012346	13(S)-HpOTrE(gamma)	13-氢过氧化-6Z,9Z,11E-十八碳三烯酸	Lipids	脂质	Free fatty acids	游离脂肪酸	C18H30O4	2	0.7553	121107-97-9	23513.9	102576	17400.3	116847	126906	352687	1.12482	0.179977	0.339606	0.240578	-2.05542	down	-	-
MW0063379	N-[(2R)-1-Hydroxypropan-2-yl]hexadecanamide	R-棕榈酰基-(1-甲基）乙醇酰胺	FA	脂肪酰类	Others	其它	C19H39NO2	2	0.7516	142128-47-0	3598.9	264.01	185.2	12659.5	17458.6	15759.6	1.25749	0.00180605	0.0629092	0.0882371	-3.50247	down	-	-
MW0139371	Pinosylvin	银松素	Others	其它类	Stilbene	茋类	C14H12O2	2	0.7469	22139-77-1 | 102-61-4	28069.2	35108.2	33772.2	89549.8	66224.6	115540	1.3621	0.0522055	0.179167	0.357333	-1.48466	down	C01745	ko00945,ko01110
MW0011719	Heudelottin C	HEUDELOTTIN C	Others	其它类	Lactones	内酯类化合物	C39H54O11	2	0.7467	11052-28-1	1163.2	9832.99	12178.7	52244	52026	46562	1.19867	0.00129565	0.0554745	0.153647	-2.70231	down	-	-
MW0168536	2-Tridecenal	2-十三烯醛	Others	其它类	Others	其它	C13H24O	2	0.7465	7774-82-5	9369.54	45764.1	8337.52	43522.3	49634	43870.3	1.02095	0.181773	0.340778	0.463203	-1.11028	down	-	-
MW0015937	Asclepin	马利筋苷	Steroids	甾体	Cardiac glycoside	强心苷	C31H42O10	2	0.7456	36573-63-4	8850	10178.2	10930.6	38336.5	55374.8	33369.7	1.40527	0.0388646	0.157771	0.235746	-2.0847	down	C08849	-
MW0103851	D-4-Hydroxyphenylglycine	D-4-羟基苯甘氨酸	Amino acids and derivatives	氨基酸及其衍生物	Amino acids and derivatives	氨基酸及其衍生物	C8H9NO3	2	0.7449	22818-40-2	10329.8	7117.81	10563.1	18392.6	24570.2	14038.9	1.24065	0.0732421	0.210821	0.491401	-1.02503	down	C03493	-
MW0000198	Corynoline	紫堇醇灵碱	Alkaloids	生物碱	Isoquinoline alkaloids	异喹啉类生物碱	C21H21NO5	2	0.7445	18797-79-0 | 68035-45-0	19132.5	50828.3	18156.8	125986	108183	140032	1.32338	0.00273558	0.0669726	0.235482	-2.08631	down	-	-
MW0144003	7-Xylosyl-10-deacetyltaxol	7-Xylosyl-10-deacetyltaxol	Alcohol and amines	醇、胺类	Alcohols	醇类	C50H57NO17	2	0.7442	90332-63-1	872.57	584.8	764.54	8605.32	19159.8	2459.3	1.27621	0.195688	0.355702	0.0735136	-3.76584	down	-	-
MW0113051	4-Heptanone	4-庚酮	Others	其它类	Ketone compounds	酮类化合物	C7H14O	2	0.7388	123-19-3	47123.6	17555.3	22824	17555.9	14882.5	8089.96	1.00104	0.222032	0.382573	2.15906	1.1104	up	-	-
MW0055121	Glyceryl monooleate	MAG 18:1	GL	甘油脂类	MG	单甘油酯	C21H40O4	2	0.7386	111-03-5 | 25496-72-4 | 33978-07-3 | 925-14-4	5184.72	14713.9	19989.6	68254	57282.2	44072.6	1.26294	0.01019	0.0959058	0.235178	-2.08818	down	-	-
MW0168670	9,12-Octadecadiynoic Acid	9,12-十八碳二烯酸	Lipids	脂质	Free fatty acids	游离脂肪酸	C18H28O2	2	0.7302	2012-14-8	6241.37	22787	19940.6	36615.2	54121.6	120160	1.16272	0.163415	0.321974	0.232194	-2.1066	down	-	-
MW0015831	Antheraxanthin	花药黄质	Heterocyclic compounds	杂环化合物	Heterocyclic compounds	杂环化合物	C40H56O3	2	0.7292	640-03-9 | 68831-78-7 | 25494-44-4	226773	307453	242269	45798.3	29864	7866.48	1.32153	0.00459401	0.075215	9.29614	3.21663	up	C08579	ko00906,ko01100,ko01110
MW0137756	Tricoumaroyl spermidine	N1，N5，N10-三香豆酰亚精胺	Heterocyclic compounds	杂环化合物	Heterocyclic compounds	杂环化合物	C34H37N3O6	2	0.7279	131086-78-7 | 364368-18-3	8497.63	18218.5	11852.1	27462.5	31018.6	40956.1	1.2857	0.0183342	0.119649	0.387866	-1.36637	down	C18069	ko00940,ko01110
MW0104863	S-(2-carboxypropyl)-Cysteamine	S-(2-羧丙基)-半胱胺	Alcohol and amines	醇、胺类	Amines	胺类	C6H13NO2S	2	0.7242	80186-81-8	763939	658344	765887	319168	423632	299263	1.37698	0.00193593	0.0632587	2.09984	1.07028	up	-	-
MW0052939	Forskolin	毛喉素	Terpenoids	萜类	Ditepenoids	二萜	C22H34O7	2	0.7241	66575-29-9 | 66428-89-5	46796.6	37517.8	73679.6	24559.3	21639.7	20417.4	1.29683	0.104988	0.255854	2.3717	1.24592	up	C09076	-
MW0153228	Lys-Lys	赖氨酰赖氨酸	Amino acids and derivatives	氨基酸及其衍生物	Amino acids and derivatives	氨基酸及其衍生物	C12H26N4O3	2	0.724	13184-13-9	32605.2	54425.2	50746.2	110763	135155	570800	1.17481	0.269005	0.425319	0.168696	-2.56751	down	-	-
MEDL02149	Acetaminophen glucuronide	P-醋氨酚-葡萄糖苷酸	Others	其它类	Ketone compounds	酮类化合物	C14H17NO8	2	0.7234	16110-10-4	269526	104486	123862	74922.7	98827.7	33420.1	1.02294	0.195832	0.355702	2.40321	1.26496	up	-	-
MW0055282	Neotigogenin acetate	新替告皂苷元乙酯	Steroids	甾体	Steroid	甾体	C29H46O4	2	0.7229	4948-43-0	34466.6	15993	19916.5	46012.3	84774.9	75734.5	1.2723	0.0423727	0.163831	0.340768	-1.55314	down	-	-
MW0012533	16Z,19Z,22Z,25Z,28Z,31Z-tetratriacontahexaenoic acid	34：6（16Z，19Z，22Z，25Z，28Z，31Z）	Lipids	脂质	Free fatty acids	游离脂肪酸	C34H56O2	2	0.7149	105528-06-1	15605.5	13482.4	13217.7	52204.6	68148.6	51576.3	1.42732	0.0140348	0.108164	0.246064	-2.0229	down	-	-
MW0159253	Val-Asn	缬氨酸-天冬酰胺	Amino acids and derivatives	氨基酸及其衍生物	Amino acids and derivatives	氨基酸及其衍生物	C9H17N3O4	2	0.7134	66170-00-1	85517.7	59717.8	57580	38524	28231.1	7808.53	1.09701	0.0283555	0.140311	2.72003	1.44362	up	-	-
MEDTN00198	L-Cysteinesulfinic acid	3-磺基-L-丙氨酸	Amino acids and derivatives	氨基酸及其衍生物	Amino acids and derivatives	氨基酸及其衍生物	C3H7NO4S	2	0.7106	1115-65-7	36749.2	58929.4	49471.6	21311.7	20408.2	22316.4	1.36221	0.0511492	0.176982	2.26669	1.18058	up	C00606	ko00270,ko00430,ko01100
MW0061828	Pinolenic Acid ethyl ester	松油酸乙酯	FA	脂肪酰类	Others	其它	C20H34O2	2	0.7069	493015-74-0	9415.62	11692.1	27484.6	128973	104898	73818.8	1.34463	0.0224567	0.12944	0.157926	-2.66268	down	-	-
MW0113800	7-Hydroxy-3,7-dimethyloctanal	7-羟基-3,7-二甲基辛醛	Others	其它类	Aldehyde compounds	醛类化合物	C10H20O2	2	0.7061	107-75-5	16956.3	20711.7	26659.7	36200.6	50150.7	177771	1.09736	0.277121	0.432873	0.243553	-2.03769	down	-	-
MW0155655	Polyphyllin B	多酚B	Terpenoids	萜类	Terpene	萜类	C51H82O20	3	0.9986	50773-42-7	5855.89	5886.97	8864.15	55412.5	51339.5	69726.4	1.42429	0.0095609	0.0930033	0.116768	-3.09829	down	-	-
MW0148248	Deltonin	三角叶薯蓣皂苷	Steroids	甾体	Steroidal saponins	甾体皂苷	C45H72O17	3	0.9986	55659-75-1	94038.7	75789.7	84281.2	39145.5	43984.6	29947.2	1.37528	0.00266667	0.0669726	2.24722	1.16814	up	C08894	-
ZINC13548595	(9Z,12Z)-octadeca-9,12-dienal	(9Z,12Z)-octadeca-9,12-dienal	Lipids	脂质	Free fatty acids	游离脂肪酸	C18H32O	3	0.9806	2541-61-9	78322.4	99784.4	104548	2659.19	3419.33	2876.93	1.43966	0.00768899	0.0850856	31.5623	4.98013	up	-	-
MEDP1061	o-Tyrosine	DL-邻酪氨酸	Amino acids and derivatives	氨基酸及其衍生物	Amino acids and derivatives	氨基酸及其衍生物	C9H11NO3	3	0.9799	2370-61-8	156788	179418	194396	411867	562539	497586	1.40887	0.0144558	0.109324	0.360465	-1.47207	down	-	-
MW0159737	Tunicamycin	Tunicamycin	Others	其它类	Others	其它	C39H64N4O16	3	0.9788	11089-65-9	189.89	650.71	364.91	7131.95	7614.95	22277.7	1.38128	0.138133	0.293804	0.0325597	-4.94077	down	C12063	-
MEDN0226	Erythrono-1,4-lactone	D-赤藓酸-内酯	Others	其它类	Lactones	内酯类化合物	C4H6O4	3	0.9761	17675-99-9	31823.6	71553.7	38420.6	97701.1	111349	185094	1.2399	0.0725104	0.209495	0.359762	-1.47489	down	-	-
ZINC43606255	Bruceine C	鸦胆子素C	Others	其它类	Lactones	内酯类化合物	C28H36O12	3	0.9709	25514-30-1	10967.8	10370.2	14749.9	5068.15	1706.9	5887.3	1.18682	0.0142379	0.108302	2.85002	1.51097	up	-	-
MEDP0395	Pipecolic acid	哌啶酸	Alkaloids	生物碱	Alkaloids	生物碱	C6H11NO2	3	0.9703	535-75-1	21308.2	22868.1	21950.5	76641.6	166724	86993.2	1.37753	0.0904256	0.235849	0.200167	-2.32073	down	C00408	ko00310,ko00960,ko01100,ko01110
MEDN0455	Guanine	鸟嘌呤	Nucleotides and derivatives	核苷酸及其衍生物	Nucleotides and derivatives	核苷酸及其衍生物	C5H5N5O	3	0.9692	73-40-5	36991.9	68429.6	55293.3	161362	162558	376288	1.30517	0.125963	0.280456	0.229524	-2.12328	down	C00242	ko00230,ko01100,ko01232
MW0063305	Radiclonic acid	自由基酸	Terpenoids	萜类	Ditepenoids	二萜	C23H40O5	3	0.9653	49620-14-6	9131.78	6603.47	8241.66	27094.1	36323.9	27657.5	1.414	0.0133132	0.106297	0.263264	-1.92542	down	-	-
MEDN1024	D-piperidine acid	D-哌啶酸	Organic acids	有机酸	Organic acids	有机酸	C6H11NO2	3	0.9646	1723-00-8	33394.7	46224.8	36541.2	79809.9	185788	104688	1.2999	0.115926	0.269083	0.313705	-1.67252	down	-	-
MEDP0179	Uridine	尿嘧啶核苷	Nucleotides and derivatives	核苷酸及其衍生物	Nucleotides and derivatives	核苷酸及其衍生物	C9H12N2O6	3	0.9632	58-96-8	42405.1	79975.3	71867	166685	151116	225452	1.3195	0.0200778	0.124817	0.357564	-1.48373	down	C00299	ko00240,ko01100,ko01232,ko02010
MEDP0456	Piperidine	哌啶	Alkaloids	生物碱	Piperidine alkaloids	哌啶类生物碱	C5H11N	3	0.9625	110-89-4	71071.2	90041.7	83243.1	178520	329389	245894	1.36388	0.0579827	0.185995	0.324164	-1.6252	down	C01746	ko00960
MEDN1426	9(S),12(S),13(S)-TriHOME	9(S),12(S),13(S)-三羟基-10(E)-十八烯酸	Lipids	脂质	Free fatty acids	游离脂肪酸	C18H34O5	3	0.9625	97134-11-7	18741.4	22843.9	22852.9	50416.4	68769.1	247335	1.20532	0.250019	0.407729	0.175811	-2.50791	down	C14833	ko00591
MEDP1647	2-Amino-1-phenylethanol	苯基乙醇胺	Alkaloids	生物碱	Alkaloids	生物碱	C8H11NO	3	0.9611	7568-93-6	187492	221871	231579	539758	753583	683565	1.41094	0.0160519	0.112789	0.324215	-1.62498	down	C02735	-
MW0011404	Farnesylacetone	金合欢基乙酰	Others	其它类	Ketone compounds	酮类化合物	C18H30O	3	0.9601	1117-52-8 | 762-29-8	129334	144603	127129	20983.3	18298.3	19917.1	1.43978	0.00195318	0.0632894	6.77491	2.7602	up	-	-
MW0111391	4-O-feruloyl-D-quinic acid	4-阿魏酰奎宁酸	Organic acids	有机酸	Organic acids	有机酸	C17H20O9	3	0.9563	76272-56-5	24764.1	48551.4	70316.8	5855.19	5529.49	6725.8	1.37988	0.0861374	0.229633	7.9309	2.98748	up	-	-
MW0103084	Venturicidin A	文丘里西丁A	Others	其它类	Others	其它	C41H67NO11	3	0.955	33538-71-5	250824	213897	112772	73058.2	53291.4	35145.7	1.28011	0.0697169	0.206139	3.57591	1.83831	up	-	-
Hmpn005101	3-Hydroxyphloretin-4'-glucoside	3-羟基根皮苷	Flavonoids	黄酮	Chalcones	查耳酮	C21H24O11	3	0.9545	18777-73-6	161833	70989.8	82967.5	49190.2	53279.8	13872.3	1.05798	0.130688	0.285361	2.71432	1.44059	up	-	-
MEDN1089	FFA(17:1)	1-顺-十七碳烯酸(17:1n7)	Lipids	脂质	Free fatty acids	游离脂肪酸	C17H32O2	3	0.9541	29743-97-3	46.22	4173.85	674.16	15059.9	29834	21042.1	1.17589	0.0329652	0.148804	0.0742269	-3.75191	down	-	-
MEDL02396	Sucrose	D-蔗糖	Others	其它类	Saccharides	糖类	C12H22O11	3	0.9466	57-50-1	269795	254294	109295	512337	345463	412282	1.1197	0.0395991	0.158838	0.498694	-1.00377	down	C00089	ko00052,ko00500,ko01100,ko01110,ko02010
MEDL02145	Procyanidin B1	原花青素 B1	Tannins	鞣质	Proanthocyanidins	原花青素	C30H26O12	3	0.9403	20315-25-7	576369	579425	627205	233153	171358	101080	1.35299	0.00299233	0.0680309	3.52657	1.81826	up	-	-
MEDN0684	Methyl?beta-D-galactopyranoside	甲基β-D-吡喃半乳糖苷	Others	其它类	Saccharides	糖类	C7H14O6	3	0.9391	1824-94-8	69795.1	46838.8	16291.7	79105	132815	99886.7	1.06854	0.0536244	0.181451	0.426308	-1.23003	down	-	-
MEDN0403	Urocanic acid	尿刊酸	Organic acids	有机酸	Organic acids	有机酸	C6H6N2O2	3	0.9293	3465-72-3	68145.3	74868.3	70722	181761	208085	193148	1.43631	0.00236204	0.0669726	0.366617	-1.44765	down	C00785	ko00340,ko01100
MW0009686	Rivenprost	利文前列素	Benzene and substituted derivatives	苯及其衍生物	Benzene and substituted derivatives	苯及其衍生物	C24H34O6S	3	0.9285	256382-08-8	7666.76	17959.5	8908.27	41337.3	37274.2	38570.3	1.33701	0.00738093	0.0838361	0.294709	-1.76263	down	-	-
MW0055301	Neryl rhamnosyl-glucoside	橙花鼠李糖苷	Terpenoids	萜类	Terpene	萜类	C22H38O10	3	0.925	84534-31-6	6783.03	2013.34	2484.19	16902.5	18327.3	17054.3	1.31944	0.00783783	0.0851592	0.215755	-2.21254	down	-	-
MEDL02244	Podofilox	苦鬼臼毒素	Lignans and Coumarins	木脂素和香豆素	Lignans	木脂素	C22H22O8	3	0.9188	477-47-4	12157.2	8784.94	5540.77	34261.9	86083.8	105428	1.34443	0.0876886	0.231574	0.117299	-3.09174	down	C10874	ko00999,ko01100,ko01110
MW0139747	Spinosin A	斯皮诺辛A	Flavonoids	黄酮	Flavones	黄酮	C39H42O19	3	0.9166	77690-91-6	8775	38332	16923.8	45518.1	94042.4	248502	1.15728	0.217755	0.378562	0.165001	-2.59945	down	-	-
MEDP0513	Palmitic amide	十六碳酰胺	Others	其它类	Others	其它	C16H33NO	3	0.916	629-54-9	417894	485257	503068	11707.9	13033.1	11724.6	1.44185	0.00320434	0.0680309	38.5629	5.26914	up	-	-
MW0155573	Pilocereine	皮洛切莱因	Heterocyclic compounds	杂环化合物	Heterocyclic compounds	杂环化合物	C45H65N3O6	3	0.8908	2552-47-8	245236	248206	217446	73416.6	91430.6	36091.3	1.32709	0.00206354	0.0635586	3.53783	1.82287	up	C09609	-
MW0112925	3'-Sialyllactosamine	3'-唾液酸乳糖胺	Alcohol and amines	醇、胺类	Amines	胺类	C23H40N2O18	3	0.8825	126151-66-4	13299.4	9871.25	5172	656.75	5641.64	1888.23	1.0711	0.0854006	0.228391	3.46206	1.79163	up	-	-
MEDP1295	Cytarabine	阿糖胞苷	Nucleotides and derivatives	核苷酸及其衍生物	Nucleotides and derivatives	核苷酸及其衍生物	C9H13N3O5	3	0.8669	147-94-4	6338.85	17697.1	13157.6	32059.5	30171.8	47441.5	1.24245	0.0276155	0.139886	0.339132	-1.56008	down	C02961	-
MEDN1026	Biosone	次甘草酸(β型)	Terpenoids	萜类	Triterpene	三萜	C30H46O4	3	0.8569	471-53-4	34555.6	29599.8	29796.5	179627	191104	765988	1.32981	0.214381	0.373957	0.0826518	-3.59681	down	C02283	-
MEDP1068	1,2-Dioctanoyl-sn-glycero-3-phosphocholine	PC(8:0/8:0)	GP	甘油磷脂类	PC	磷脂酰胆碱	C24H48NO8P	3	0.8552	19191-91-4	11375.5	11852	12003.7	3083.51	6690.13	5904.25	1.25848	0.0243029	0.13345	2.24719	1.16812	up	-	-
MW0118238	2-Amino-1,4-dihydro-4-oxopteridine-7-carboxylic acid	2-氨基-1,4-二氢-4-氧代蝶啶-7-羧酸	Heterocyclic compounds	杂环化合物	Pteridines and derivatives	蝶啶及其衍生物	C7H5N5O3	3	0.8541	31010-60-3	35998.7	28316.6	26761.5	15516.4	11391.1	13583.4	1.37442	0.0162289	0.112909	2.24931	1.16948	up	-	-
MEDP1180	1-Myristoyl-sn-glycero-3-phosphocholine	溶血磷脂酰胆碱 14:0	Lipids	脂质	LPC	溶血磷脂酰胆碱	C22H46NO7P	3	0.8512	20559-16-4	19649.1	9731.65	14469.1	37943.9	34966.3	39573.1	1.32923	0.00650563	0.0818674	0.389834	-1.35907	down	-	-
MW0008809	N-Acetyltyramine	N-乙酰乙胺	Phenolic acids	酚酸类	Phenolic acids	酚酸类	C10H13NO2	3	0.8479	1202-66-0	35516.9	60354.1	46776.7	71166.9	105067	163136	1.1924	0.126508	0.280542	0.420332	-1.2504	down	-	-
MEDP1683	Trileucine	亮氨酸-亮氨酸-亮氨酸	Amino acids and derivatives	氨基酸及其衍生物	Amino acids and derivatives	氨基酸及其衍生物	C18H35N3O4	3	0.8452	10329-75-6	8471.03	13695.8	10491.2	42550.6	95283	224559	1.31502	0.179011	0.33861	0.0901179	-3.47204	down	-	-
MEDL01856	Umbelliferone	7-羟基香豆素	Lignans and Coumarins	木脂素和香豆素	Coumarins	香豆素	C9H6O3	3	0.8413	93-35-6	101673	162535	147750	421421	360536	449000	1.3866	0.001648	0.0606883	0.334665	-1.57921	down	C09315	ko00999,ko01110
MEDL00434	Turanose	松二糖	Others	其它类	Saccharides	糖类	C12H22O11	3	0.8256	547-25-1	375403	360804	333885	1.06704e+06	1.1995e+06	1.25024e+06	1.4366	0.00314438	0.0680309	0.304282	-1.71652	down	C19636	-
MW0113976	beta-CYCLODEXTRIN	β-环糊精	Others	其它类	Saccharides	糖类	C42H70O35	3	0.8251	7585-39-9 | 37331-89-8 | 79647-56-6	10283.5	17028.3	7393.44	36757.5	25522.2	30438.5	1.28758	0.0115102	0.101883	0.374309	-1.4177	down	-	-
MEDP1839	3,4-Dimethoxybenzaldehyde	藜芦醛	Phenolic acids	酚酸类	Phenolic acids	酚酸类	C9H10O3	3	0.8025	120-14-9	530481	255542	231973	166748	175581	159244	1.10706	0.213996	0.373476	2.0296	1.0212	up	C02201	-
MEDP0022	L-Proline	L-脯氨酸	Amino acids and derivatives	氨基酸及其衍生物	Amino acids and derivatives	氨基酸及其衍生物	C5H9NO2	3	0.7998	147-85-3	45500.6	68268.2	35202.8	116374	180595	96377.2	1.26742	0.0701664	0.206267	0.378729	-1.40076	down	C00148	ko00330,ko00332,ko00470,ko00970,ko01100,ko01110,ko01230,ko02010
MEDN1476	Allantoic acid	尿囊酸	Organic acids	有机酸	Organic acids	有机酸	C4H8N4O4	3	0.7971	99-16-1	3030.89	1116.7	6241.85	16087.1	15470.1	16362.7	1.24823	0.012017	0.102745	0.216809	-2.20551	down	C00499	ko00230,ko01100
MW0136756	6''-O-Acetylgenistin	6''-O-乙酰染料木苷	Flavonoids	黄酮	Isoflavones	异黄酮	C23H22O11	3	0.7886	73566-30-0	10387.5	9393.01	12576.5	1174.2	852.83	1070.56	1.43516	0.00864623	0.0887779	10.4459	3.38486	up	-	-
FDATN01339	Vitexin 2''-O-rhamnoside	牡荆素-2''-O-鼠李糖苷	Flavonoids	黄酮	Flavones	黄酮	C27H30O14	3	0.7836	64820-99-1	19534.8	24974.9	23818	3335	4643.37	2602.55	1.41638	0.00349165	0.0691677	6.45763	2.69101	up	C12628	ko00944
MEDN0060	N-Isovaleroylglycine	N-异戊酰氨基乙酸	Amino acids and derivatives	氨基酸及其衍生物	Amino acids and derivatives	氨基酸及其衍生物	C7H13NO3	3	0.7767	16284-60-9	4589.01	6031.7	255.52	16896.6	16996.9	25805.8	1.09163	0.0148948	0.110579	0.182184	-2.45653	down	-	-
MW0157343	Tarennoside	塔伦诺苷	Terpenoids	萜类	Terpene	萜类	C16H22O9	3	0.7756	61081-59-2	35693.8	29409	34231.9	15624.1	14651.7	17790.3	1.40755	0.00444998	0.0743943	2.06663	1.04728	up	C11654	-
MW0114510	Gastrodin	天麻素	Phenolic acids	酚酸类	Phenolic acids	酚酸类	C13H18O7	3	0.7754	62499-27-8	567.84	1223.1	1197.98	9910.28	12594.5	4660.86	1.35595	0.0731733	0.210754	0.110026	-3.18408	down	C16964	-
MW0000486	Ethyl eburnamenine-14-carboxylate	Ethyl eburnamenine-14-carboxylate	Alkaloids	生物碱	Alkaloids	生物碱	C22H26N2O2	3	0.7718	77549-94-1 | 68780-77-8	9837.47	19604.5	18519.4	39218.1	46889.6	176555	1.1833	0.249074	0.406794	0.182597	-2.45327	down	-	-
MEDN1013	2'-Deoxyadenosine-5'-monophosphate	2'-脱氧腺苷-5'-单磷酸	Nucleotides and derivatives	核苷酸及其衍生物	Nucleotides and derivatives	核苷酸及其衍生物	C10H14N5O6P	3	0.7711	653-63-4	20603	12496.1	16325.7	6756.73	5652.69	3902.7	1.34487	0.0308851	0.145918	3.02994	1.59929	up	C00360	ko00230,ko01100,ko01232
MEDN1417	13-Hpode	13-过氧化羟基-9Z,11E-十八碳二烯酸	Lipids	脂质	Free fatty acids	游离脂肪酸	C18H32O4	3	0.7702	23017-93-8	20922.2	40214.6	17347.2	40413.9	61054.9	94677.6	1.15023	0.115824	0.269083	0.400129	-1.32146	down	C04717	ko00591,ko01100
MW0116592	1,2-Diacetoxy-4,7,8-trihydroxy-3-(4-hydroxyphenyl)dibenzofuran	1,2-二乙酰氧基-4,7,8-三羟基-3-(4-羟基苯基)二苯并呋喃	Benzene and substituted derivatives	苯及其衍生物	Benzene and substituted derivatives	苯及其衍生物	C22H16O9	3	0.7635	146905-24-0	50750.8	117449	111754	35482.2	38028.6	59581.7	1.07618	0.137323	0.292822	2.10345	1.07276	up	-	-
MEDN0037	Dopamine	多巴胺	Alkaloids	生物碱	Phenolamine	酚胺	C8H11NO2	3	0.76	62-31-7	12018.1	6780.32	29188.4	62691.9	79498.7	79904.4	1.28168	0.0030798	0.0680309	0.216065	-2.21046	down	C03758	ko00350,ko00950,ko00965,ko01100,ko01110
MEDN0722	Orcinol	3-羟基-5-甲基苯酚	Phenolic acids	酚酸类	Phenolic acids	酚酸类	C7H8O2	3	0.7574	504-15-4	98950.2	120904	115632	43921.3	71860.6	47567.5	1.31868	0.00781305	0.0851592	2.0538	1.0383	up	C00727	-
MW0114576	Helicide	豆腐果苷	Phenolic acids	酚酸类	Phenolic acids	酚酸类	C13H16O7	3	0.7541	80154-34-3	49203.4	20030.7	23683	12202.8	8733.76	6149.17	1.25188	0.134701	0.290651	3.43048	1.77841	up	-	-
MEDL00722	Fumaric acid	富马酸盐	Organic acids	有机酸	Organic acids	有机酸	C4H4O4	3	0.7474	110-17-8	28790.2	37550.3	32083.5	16396.2	20217	7494.5	1.17719	0.021092	0.126117	2.23145	1.15798	up	C00122	ko00020,ko00190,ko00220,ko00250,ko00350,ko00360,ko00620,ko00650,ko00760,ko01100,ko01110,ko01200
ZINC85531494	4H-1-Benzopyran-4-one,5,6,7,8-tetrahydro-5,6,7-trihydroxy-8-[[4-oxo-2-(2-phenylethyl)-4H-1-benzopyran-6-yl]oxy]-2-(2-phenylethyl)-, (5S,6R,7R,8S)	2-(2-苯乙基)-6-[[（5S，6R，7R，8S)-5，6，7-三羟基-4-氧代-2-(2-苯乙基)-5，6，7，8-四氢苯并吡喃-8-基]氧]苯并吡喃-4-酮	Others	其它类	Ketone compounds	酮类化合物	C34H30O8	3	0.747	121795-56-0	9479.39	3676.9	7645.53	17904.4	21131.7	21068.9	1.28097	0.00525594	0.078477	0.346091	-1.53078	down	-	-
MW0105129	3-phenylspiro[1,3-thiazolidine-2,3'-1H-indole]-2',4-dione	3-苯基螺[1,3-噻唑烷-2,3'-1H-吲哚]-2',4-二酮	Others	其它类	Ketone compounds	酮类化合物	C16H12N2O2S	3	0.7468	79962-56-4	13675.9	25769.6	16851.6	12119	4695.57	9945.49	1.08461	0.0947267	0.242028	2.10378	1.07298	up	-	-
MW0106937	Glu-Ala	谷氨酸-丙氨酸	Amino acids and derivatives	氨基酸及其衍生物	Amino acids and derivatives	氨基酸及其衍生物	C8H14N2O5	3	0.7464	21064-18-6	497065	521497	548657	1.53418e+06	723913	984739	1.20903	0.143735	0.300696	0.483287	-1.04905	down	-	-
MEDN1734	5-(tetradecyloxy)Furan-2-carboxylic acid(TOFA)	5-(十四氧基)呋喃-2-甲酸	Heterocyclic compounds	杂环化合物	Heterocyclic compounds	杂环化合物	C19H32O4	3	0.7463	54857-86-2	6624.74	8458.39	4911.09	11013.4	15217.3	17228	1.28182	0.0310853	0.146284	0.460075	-1.12006	down	-	-
MW0011985	methyl (4S,5E,6S)-5-(2-acetyloxyethylidene)-4-[2-[2-(4-hydroxyphenyl)ethoxy]-2-oxoethyl]-6-[(2S,3R,4S,5S,6R)-3,4,5-trihydroxy-6-(hydroxymethyl)oxan-2-yl]oxy-4H-pyran-3-carboxylate	甲基 (4S,5E,6S)-5-(2-乙酰氧基亚乙基)-4-[2-[2-(4-羟基苯基)乙氧基]-2-氧乙基]-6-[(2S,3R,4S,5S, 6R)-3,4,5-trihydroxy-6-(hydroxymethyl)oxan-2-yl]oxy-4H-pyran-3-carboxylate	Terpenoids	萜类	Terpene	萜类	C27H34O14	3	0.7439	57799-95-8	769.73	4064.57	3792.77	100.07	93.86	94.58	1.36659	0.119079	0.273123	29.9022	4.90218	up	-	-
MEDN0422	2'-Deoxyadenosine	2'-脱氧腺苷	Nucleotides and derivatives	核苷酸及其衍生物	Nucleotides and derivatives	核苷酸及其衍生物	C10H13N5O3	3	0.7433	958-09-8	3973.59	6468.44	5568.56	10177.2	13624.4	14746.6	1.33307	0.0163941	0.113467	0.415339	-1.26764	down	C00559	ko00230,ko01100,ko01232,ko02010
MEDP0437	Ergothioneine	麦角硫因	Alkaloids	生物碱	Alkaloids	生物碱	C9H15N3O2S	3	0.743	497-30-3	221001	220126	215135	104506	104736	108077	1.44115	4.95838e-06	0.0129714	2.06815	1.04834	up	C05570	ko00340,ko01100
MW0111446	Decarboxytiaprofenic acid	脱羧基苯丙酸	Others	其它类	Ketone compounds	酮类化合物	C13H12OS	3	0.7429	6933-26-2	5968.63	2643.06	3007.66	2398.27	1756.56	1590.97	1.08993	0.199369	0.35981	2.02223	1.01595	up	-	-
MEDL00977	(E,Z)-2-Amino-3,14-octadecadien-1-ol	（E，Z)-2-氨基-3,14-十八二烯-1-醇	Alcohol and amines	醇、胺类	Alcohols	醇类	C18H35NO	3	0.7416	158507-68-7	1955.1	2457.43	3965.76	78.43	429.31	96.78	1.3419	0.0460235	0.170446	13.8594	3.79279	up	-	-
MW0157326	methyl (1R,12R,14S,15E)-12-[(1R,15S,17S,18S)-17-ethyl-3,13-diazapentacyclo[13.3.1.02,10.04,9.013,18]nonadeca-2(10),4(9),5,7-tetraen-6-yl]-15-ethylidene-17-methyl-10,17-diazatetracyclo[12.3.1.03,11.04,9]octadeca-3(11),4,6,8-tetraene-18-carboxylate	methyl (1R,12R,14S,15E)-12-[(1R,15S,17S,18S)-17-ethyl-3,13-diazapentacyclo[13.3.1.02,10.04,9.013,18]nonadeca-2(10),4(9),5,7-tetraen-6-yl]-15-ethylidene-17-methyl-10,17-diazatetracyclo[12.3.1.03,11.04,9]octadeca-3(11),4,6,8-tetraene-18-carboxylate	Alkaloids	生物碱	Alkaloids	生物碱	C40H48N4O2	3	0.7411	59626-92-5	272.19	1200.23	2999.6	10038.9	34162.8	25260.7	1.27494	0.08959	0.234592	0.0643803	-3.95724	down	C09242	-
MEDL00422	PC(18:3/18:3)	PC(18:3/18:3)	GP	甘油磷脂类	PC	磷脂酰胆碱	C44H76NO8P	3	0.7393	324054-21-9	63784.1	63711.1	70100.4	122168	290865	121419	1.21242	0.184377	0.343218	0.369716	-1.43551	down	-	-
MEDL02596	6''-O-Acetylglycitin	乙酰黄豆黄苷	Flavonoids	黄酮	Isoflavones	异黄酮	C24H24O11	3	0.7383	134859-96-4	119563	94293.9	112570	20962.3	11008.6	22423.2	1.3969	0.0020527	0.0635586	6.00114	2.58524	up	-	-
MW0017008	N-tetracosanoylsphingosine	神经酰胺（d18：1/24：0）	SL	鞘脂类	Cer	神经酰胺	C42H83NO3	3	0.7366	34435-05-7	19817.4	12069.8	8838.55	144196	65323.4	44187.5	1.30369	0.143341	0.300407	0.160523	-2.63915	down	C00195	ko00600,ko01100
MW0010239	Colchicine	秋水仙碱	Alkaloids	生物碱	Alkaloids	生物碱	C22H25NO6	3	0.7364	64-86-8 | 30512-31-3	478110	483295	586189	1.09143e+06	1.3885e+06	1.16696e+06	1.4047	0.00836728	0.0877044	0.42436	-1.23664	down	C07592	ko00950,ko01110
MW0147862	Cucurbitacin E	葫芦素 E	Terpenoids	萜类	Triterpene	三萜	C32H44O8	3	0.7354	18444-66-1	8389.47	9821.25	8560.64	21526.7	21715.5	22966.3	1.43326	3.2897e-05	0.0180449	0.404349	-1.30633	down	C08797	ko00996,ko01110
MEDL02258	Nordihydrocapsaicin	去甲二氢辣椒素	Alkaloids	生物碱	Phenolamine	酚胺	C17H27NO3	3	0.734	28789-35-7	444.23	775.79	2780.17	11316	23235.3	25065.4	1.33218	0.046549	0.171232	0.0670985	-3.89758	down	C20216	-
MEDL01954	2'-Hydroxygenistein	2'-羟基染料木素	Flavonoids	黄酮	Isoflavones	异黄酮	C15H10O6	3	0.7339	1156-78-1	4469.27	25173.2	33089.4	532.94	7186.85	1198.59	1.08108	0.164004	0.322176	7.034	2.81434	up	C12134	ko00943
MW0009985	Trimethoprim	甲氧苄啶	Phenolic acids	酚酸类	Phenolic acids	酚酸类	C14H18N4O3	3	0.7332	738-70-5	18957.5	27452.9	21597.2	6691.46	6631.16	8266.59	1.40584	0.021413	0.126559	3.15007	1.65539	up	C01965	-
MW0006920	DMABA NHS Ester	DMABA NHS酯	Benzene and substituted derivatives	苯及其衍生物	Benzene and substituted derivatives	苯及其衍生物	C13H14N2O4	3	0.7314	58068-85-2	89172.3	78213	93165.9	143717	216751	205192	1.35483	0.041757	0.162231	0.460616	-1.11836	down	-	-
MEDL01940	Feruloylputrescine	阿魏酰腐胺	Alkaloids	生物碱	Phenolamine	酚胺	C14H20N2O3	3	0.7307	501-13-3 | 91000-11-2	296002	368359	384528	104372	139472	126282	1.40818	0.00763506	0.0850856	2.83386	1.50277	up	-	-
MW0154038	Myxochelin A	粘液螯合素A	Benzene and substituted derivatives	苯及其衍生物	Benzene and substituted derivatives	苯及其衍生物	C20H24N2O7	3	0.7287	120243-02-9	20161.7	21619.5	15028.2	37630	37871.2	39477.4	1.3805	0.00675271	0.0823916	0.494087	-1.01716	down	C12220	-
MEDP1496	L-alpha-Aminobutyric acid	L-2-氨基丁酸	Amino acids and derivatives	氨基酸及其衍生物	Amino acids and derivatives	氨基酸及其衍生物	C4H9NO2	3	0.7287	1492-24-6	90634.7	77058.4	80201.5	190854	155243	155251	1.40258	0.0120239	0.102745	0.494456	-1.01609	down	C02356	ko00270,ko01100
MW0011164	(3b,6a,12b,17a,20S)-Dammar-24-ene-3,6,12,17,20-pentol 20-[glucosyl-(1->2)-[rhamnosyl-(1->6)]-glucoside] 6-xyloside	(3b,6a,12b,17a,20S)-Dammar-24-ene-3,6,12,17,20-pentol 20-[glucosyl-(1->2)-[rhamnosyl-(1->6)]-glucoside] 6-xyloside	Terpenoids	萜类	Terpene	萜类	C53H90O23	3	0.727	251101-56-1	132336	76450	104248	57156.1	50479.4	47970.8	1.29407	0.0789949	0.218567	2.0117	1.00842	up	-	-
MEDN0469	Citraconic acid	柠康酸	Organic acids	有机酸	Organic acids	有机酸	C5H6O4	3	0.7261	498-23-7	30004.7	18445.5	17557.3	8563.92	5908.32	1510.68	1.18899	0.0345675	0.152031	4.12988	2.0461	up	C02226	ko00290,ko00660,ko01100,ko01210
MW0119154	3,3-Dimethyl-1,2-dithiolane	3,3-二甲基-1,2-二硫杂环戊烷	Heterocyclic compounds	杂环化合物	Heterocyclic compounds	杂环化合物	C5H10S2	3	0.7261	58384-57-9	1522.92	3675.34	1476.19	10312.6	11469.2	29718.1	1.31984	0.138778	0.294202	0.129601	-2.94785	down	-	-
MW0001222	1-(Dimethylamino)-3-(1-naphthalenyloxy)-2-propanol	1-(二甲氨基)-3-(1-萘氧基)-2-丙醇	Benzene and substituted derivatives	苯及其衍生物	Benzene and substituted derivatives	苯及其衍生物	C15H19NO2	3	0.7244	2111-26-4	5363.93	7536.47	4514.29	1956.64	2352.78	1717.55	1.36444	0.0468193	0.171732	2.88946	1.5308	up	-	-
MW0123504	Decitabine	地西他滨; 5-氮杂-2'-脱氧胞嘧啶核苷 <DNA甲基转移酶(DNMT)抑制剂>	Nucleotides and derivatives	核苷酸及其衍生物	Nucleotides and derivatives	核苷酸及其衍生物	C8H12N4O4	3	0.7243	2353-33-5	20066	28032.1	23711.3	95696.9	201082	189445	1.39168	0.0530332	0.180935	0.147688	-2.75938	down	-	-
MW0123420	coproporphyrinogen III	卟啉原	Heterocyclic compounds	杂环化合物	Heterocyclic compounds	杂环化合物	C36H44N4O8	3	0.724	2624-63-7	71537	36094.2	49253.2	7267.56	30045	17227.3	1.1355	0.0598934	0.18918	2.87651	1.52432	up	C03263	ko00860,ko01100,ko01110,ko01240
FDATP01159	Phenazine methosulfate	吩嗪硫酸甲酯	Organic acids	有机酸	Organic acids	有机酸	C14H14N2O4S	3	0.724	299-11-6 | 94845-69-9	290.95	1491.52	1275.9	118.37	217.23	154.99	1.20229	0.145695	0.302338	6.23407	2.64017	up	C00200	-
MW0120544	4-Hydroxydebrisoquine	4-羟基去氢异喹	Heterocyclic compounds	杂环化合物	Heterocyclic compounds	杂环化合物	C10H13N3O	3	0.7231	59333-79-8	55189.3	55025.3	50921.6	148257	138683	122634	1.43058	0.00654586	0.0818674	0.393424	-1.34584	down	-	-
MW0009758	Sotalol	索他洛尔	Benzene and substituted derivatives	苯及其衍生物	Benzene and substituted derivatives	苯及其衍生物	C12H20N2O3S	3	0.7219	3930-20-9	4358.7	3933.14	2863.23	14984.3	8183.26	7130.79	1.26938	0.117814	0.27116	0.368174	-1.44154	down	C07309	-
MW0054350	Ligstroside	Ligstroside	Terpenoids	萜类	Monoterpenoids	倍萜	C25H32O12	3	0.7211	35897-92-8	9018.7	5170.59	8631.32	2317.29	3400	3418.23	1.29742	0.0549857	0.18321	2.49801	1.32078	up	-	-
MEDP0065	N-Acetyl-L-glutamic acid	N-乙酰-L-谷氨酸	Amino acids and derivatives	氨基酸及其衍生物	Amino acids and derivatives	氨基酸及其衍生物	C7H11NO5	3	0.721	1188-37-0	22759.9	34878.7	36341.1	8145.82	6446.69	6044.09	1.40697	0.0273985	0.13956	4.55403	2.18714	up	C00624	ko00220,ko00470,ko01100,ko01110,ko01210,ko01230
MEDN0698	1-Naphthol	1-萘酚	Phenolic acids	酚酸类	Phenolic acids	酚酸类	C10H8O	3	0.7194	90-15-3	3342.7	3363.29	2671.92	22550.9	28245.3	68419.1	1.38837	0.126546	0.280542	0.0786637	-3.66816	down	C11714	-
MEDP0689	Tranexamic Acid	反式-4-(氨甲基)环己烷甲酸	Organic acids	有机酸	Organic acids	有机酸	C8H15NO2	3	0.7194	1197-18-8	1728.49	1485.66	668.73	6122.02	6560.51	7389.74	1.36662	0.00043595	0.0505702	0.193445	-2.37	down	-	-
MW0104381	N-(Carboxymethyl)-N-(phosphonomethyl)glycine	N-(羧甲基)-N-(膦酰基甲基)甘氨酸	Benzene and substituted derivatives	苯及其衍生物	Benzene and substituted derivatives	苯及其衍生物	C5H10NO7P	3	0.719	5994-61-6	3458.98	6560.8	5826.25	805.61	740.71	617.59	1.41129	0.0392071	0.158468	7.32287	2.87241	up	-	-
MEDN1709	2-Octanamidoacetic acid	辛酰甘氨酸	Amino acids and derivatives	氨基酸及其衍生物	Amino acids and derivatives	氨基酸及其衍生物	C10H19NO3	3	0.7172	14246-53-8	13763.8	16150	14504.1	78866.9	95657	121500	1.42873	0.0208803	0.125984	0.150049	-2.7365	down	-	-
MEDN1046	Pyrocatechol	邻苯二酚;儿茶酚	Phenolic acids	酚酸类	Phenolic acids	酚酸类	C6H6O2	3	0.7168	120-80-9	95378.1	124578	111973	53057.4	35768.8	59403.3	1.33121	0.00562175	0.0790937	2.23929	1.16304	up	C15571	-
MEDN0682	Octadecanamide	硬脂酰胺	Lipids	脂质	Free fatty acids	游离脂肪酸	C18H37NO	3	0.7168	124-26-5	43191.7	52071.6	54325.4	556.89	184.76	284.43	1.43123	0.00464108	0.0752288	145.787	7.18771	up	C13846	-
MW0146461	(1'R,2R,3S,4'S,6S,8'R,10'Z,12'S,13'S,14'Z,16'Z,20'R,21'R,24'S)-24'-hydroxy-12'-[(2R,4S,5S,6S)-5-[(2S,4S,5S,6S)-5-hydroxy-4-methoxy-6-methyloxan-2-yl]oxy-4-methoxy-6-methyloxan-2-yl]oxy-21'-methoxy-3,11',13',22'-tetramethyl-2-propan-2-ylspiro[2,3-dihydropyran-6,6'-3,7,19-trioxatetracyclo[15.6.1.14,8.020,24]pentacosa-10,14,16,22-tetraene]-2'-one	(1'R,2R,3S,4'S,6S,8'R,10'Z,12'S,13'S,14'Z,16'Z,20'R,21'R,24'S)-24'-hydroxy-12'-[(2R,4S,5S,6S)-5-[(2S,4S,5S,6S)-5-hydroxy-4-methoxy-6-methyloxan-2-yl]oxy-4-methoxy-6-methyloxan-2-yl]oxy-21'-methoxy-3,11',13',22'-tetramethyl-2-propan-2-ylspiro[2,3-dihydropyran-6,6'-3,7,19-trioxatetracyclo[15.6.1.14,8.020,24]pentacosa-10,14,16,22-tetraene]-2'-one	Heterocyclic compounds	杂环化合物	Heterocyclic compounds	杂环化合物	C48H72O14	3	0.7166	65195-52-0	20899.1	27851.2	26465.6	10378.1	5968.57	13506.8	1.27659	0.00772333	0.0850856	2.5195	1.33314	up	-	-
MW0147243	Cassine	卡辛	Alkaloids	生物碱	Alkaloids	生物碱	C18H35NO2	3	0.7157	5227-24-7	4999.55	1910.94	2021.79	116936	129461	99052.7	1.42294	0.00562459	0.0790937	0.0258569	-5.27331	down	-	-
MW0117913	5-methyl-4-(4-methylphenyl)-4H-1,2,4-triazole-3-thiol	5-甲基-4-(4-甲基苯基)-4H-1,2,4-三唑-3-硫醇	Others	其它类	Ketone compounds	酮类化合物	C10H11N3S	3	0.712	149747-23-9	14199.7	14632.9	13047.1	6272.72	3792.09	9321.68	1.22002	0.0339384	0.150489	2.16025	1.1112	up	-	-
MW0001955	2-(Morpholin-4-yl)ethyl 2,4-dihydroxybenzoate	2-(吗啉-4-基)2,4-二羟基苯甲酸乙酯	Benzene and substituted derivatives	苯及其衍生物	Benzene and substituted derivatives	苯及其衍生物	C13H17NO5	3	0.7097	84139-72-0	7619.1	6919.68	5680.43	105696	86311.4	115034	1.43766	0.00752717	0.0849427	0.0658517	-3.92464	down	-	-
MW0120062	2-Methyl-4,5-diphenyl-1H-imidazole	2-甲基-4,5-二苯基-1H-咪唑	Heterocyclic compounds	杂环化合物	Heterocyclic compounds	杂环化合物	C16H14N2	3	0.7082	2818-82-8	4996.11	5957.29	3547.93	998.32	2138.87	3504	1.06884	0.060073	0.189361	2.18354	1.12667	up	-	-
MW0124205	Gambogic acid	藤黄酸	Organic acids	有机酸	Organic acids	有机酸	C38H44O8	3	0.7082	2752-65-0	2428.26	1459.53	1133.09	13216.6	15937.9	7248.37	1.37195	0.05231	0.17926	0.137925	-2.85804	down	-	-
MEDN0746	Butylparaben	对羟基苯甲酸丁酯	Phenolic acids	酚酸类	Phenolic acids	酚酸类	C11H14O3	3	0.7078	94-26-8	26789.7	9846.78	14706.9	5733.71	4865.47	4217.14	1.27834	0.135825	0.29097	3.46532	1.79299	up	-	-
MEDL00860	D-Ornithine	D-鸟氨酸	Amino acids and derivatives	氨基酸及其衍生物	Amino acids and derivatives	氨基酸及其衍生物	C5H12N2O2	3	0.7074	348-66-3	2743.92	3957.63	3979.49	5630.29	13541.4	6273.95	1.15044	0.189196	0.348223	0.419759	-1.25237	down	C00515	ko00470,ko01100,ko01110
MW0011239	Dihydroroseoside	二氢蔷薇苷	Others	其它类	Ketone compounds	酮类化合物	C19H32O8	3	0.7071	142235-28-7	4184.96	13322.1	7005	33980.3	31083.2	41411.9	1.32094	0.00277809	0.0669726	0.230213	-2.11896	down	-	-
MW0156587	Secogalioside	Secogalioside	Others	其它类	Ketone compounds	酮类化合物	C17H24O12	3	0.7059	61774-57-0	4939.8	6502.31	6652.05	2027.31	277.72	1547.29	1.19074	0.00331576	0.0680309	4.69695	2.23172	up	C11674	-
MEDP0677	1-Butylamine	丁胺	Alkaloids	生物碱	Alkaloids	生物碱	C4H11N	3	0.7053	109-73-9	7367.48	12569.1	9400.58	22494	21977.5	32369.6	1.33524	0.0275431	0.139672	0.38179	-1.38915	down	-	-
MEDP1096	1,2-Dilauroyl-sn-glycero-3-phosphocholine	PC(12:0/12:0)	GP	甘油磷脂类	PC	磷脂酰胆碱	C32H64NO8P	3	0.7052	18194-25-7 | 127641-86-5	144486	148017	136720	74292.1	18047.3	8592.73	1.19091	0.0306135	0.1458	4.25258	2.08834	up	-	-
MEDP1645	Benzamide	苯甲酰胺	Phenolic acids	酚酸类	Phenolic acids	酚酸类	C7H7NO	3	0.7046	55-21-0	33817.8	29311.8	28186.3	59193.9	56186.4	80239.4	1.37163	0.0385602	0.157572	0.466803	-1.09911	down	C09815	-
MW0012431	Toxin NT 2	毒素 NT 2	Alcohol and amines	醇、胺类	Alcohols	醇类	C17H24O7	3	0.7026	76348-84-0	60077.1	58831.4	63954.2	21946.7	18297.4	41522.9	1.25071	0.0378245	0.156982	2.23639	1.16117	up	C02951	ko00999,ko01110
MEDL01873	[8]-Gingerdione	[8]-姜辣二酮	Phenolic acids	酚酸类	Phenolic acids	酚酸类	C19H28O4	3	0.7019	77334-06-6	88491.1	78302.7	59122.1	15415.5	10526	6600.36	1.38995	0.0119991	0.102745	6.94232	2.79542	up	-	-
MW0104832	N-(2-oxo-2-piperidin-1-ylethyl)benzenesulfonamide	N-(2-氧代-2-哌啶-1-基乙基)苯磺酰胺	Benzene and substituted derivatives	苯及其衍生物	Benzene and substituted derivatives	苯及其衍生物	C13H18N2O3S	3	0.7017	518359-61-0	4825.6	4660.78	3547.5	12367.3	21073.5	6697.1	1.19964	0.162103	0.321004	0.324728	-1.6227	down	-	-
MW0117282	Tert-butyl 2-oxopiperidine-1-carboxylate	2-氧代哌啶-1-羧酸叔丁酯	Organic acids	有机酸	Organic acids	有机酸	C10H17NO3	3	0.7	85908-96-9	6985.4	857.95	2434.7	21554.1	12361.1	14551.3	1.19588	0.0241819	0.133417	0.212065	-2.23742	down	-	-
MW0142806	3'-Amino-3'-deoxyadenosine 5'-(dihydrogen phosphate)	3′-氨基-3′-脱氧-AMP	Nucleotides and derivatives	核苷酸及其衍生物	Nucleotides and derivatives	核苷酸及其衍生物	C10H15N6O6P	3	0.6993	4360-05-8	8487.07	11637.5	18646.7	1157.07	978.87	1197.82	1.41775	0.0588837	0.187387	11.6299	3.53976	up	C07026	ko01100,ko01110
MW0123213	Carbadox	卡巴多	Alkaloids	生物碱	Alkaloids	生物碱	C11H10N4O4	3	0.6983	6804-07-5	237625	174603	187270	102144	98994.5	73693.8	1.35782	0.0167606	0.114873	2.18132	1.1252	up	-	-
MW0110745	2-Hexadecanoylthio-1-ethylphosphorylcholine	2-十六烷基硫代-1-乙基磷酰胆碱	Organic acids	有机酸	Organic acids	有机酸	C23H48NO5PS	3	0.6973	60793-01-3	3140.13	6235.08	6639.82	17492	14100.8	17778.1	1.32281	0.00238439	0.0669726	0.324382	-1.62423	down	-	-
MEDP0295	4-Acetamidobutanoic acid	4-乙酰氨基丁酸	Organic acids	有机酸	Organic acids	有机酸	C6H11NO3	3	0.6972	3025-96-5	907.97	1490.18	1065.99	2172.36	4391.04	5776.11	1.27291	0.102435	0.252283	0.280736	-1.83272	down	C02946	ko00330,ko01100
MEDL00019	Theophylline	茶碱	Alkaloids	生物碱	Alkaloids	生物碱	C7H8N4O2	3	0.6966	58-55-9	17769.9	14644.6	13884.2	8395.25	5729.54	7361.33	1.36114	0.00680492	0.0823916	2.15482	1.10757	up	C07130	ko00232,ko01100,ko01110
MW0120669	3,4-Dihydro-4-phenyl-1,3,5-triazino[1,2-a]benzimidazol-2-amine	3,4-二氢-4-苯基-1,3,5-三嗪[1,2-a]苯并咪唑-2-胺	Benzene and substituted derivatives	苯及其衍生物	Benzene and substituted derivatives	苯及其衍生物	C15H13N5	3	0.6965	26958-67-8	1236.34	269.78	155.5	1549.96	2364.62	3952.37	1.17638	0.0807914	0.221629	0.211215	-2.24321	down	-	-
MEDL00096	2-Methylglutaric acid	2-甲基戊二酸	Organic acids	有机酸	Organic acids	有机酸	C6H10O4	3	0.6963	617-62-9	27584	37097.5	36504.1	13084.2	13278.2	12017.5	1.4131	0.0195611	0.123728	2.63642	1.39858	up	-	-
MW0015536	acetyl Podocarpic acid anhydride	乙酰罗汉果酸酐	Others	其它类	Lactones	内酯类化合物	C38H46O7	3	0.6957	344327-48-6	29760.6	20742.6	20071	64504.7	75107.7	77901	1.40361	0.0009252	0.0541062	0.324459	-1.62389	down	-	-
MW0114099	Citrusin F	柑橘素 F	Heterocyclic compounds	杂环化合物	Heterocyclic compounds	杂环化合物	C22H32O14	3	0.6953	134860-04-1	6336.52	3722.82	2028.83	8769.83	5994	12408.4	1.08113	0.0976092	0.245282	0.444873	-1.16854	down	-	-
MEDN0150	8-Hydroxyguanosine	8-羟基鸟苷	Nucleotides and derivatives	核苷酸及其衍生物	Nucleotides and derivatives	核苷酸及其衍生物	C10H13N5O6	3	0.6942	3868-31-3	1775.25	2769.85	2600.75	5533.57	5576.84	5044.69	1.36278	0.00287232	0.0669726	0.442328	-1.17681	down	-	-
ZINC34075172	2,4-Octadienamide, N-(2-methylpropyl)-, (E,E)-	N-异丁基-2E,4E-十八酰胺	Alkaloids	生物碱	Alkaloids	生物碱	C12H21NO	3	0.6937	23512-47-2	8639.13	17328.8	14568.6	74810.5	90109.1	70217.6	1.39926	0.00333647	0.0680309	0.172395	-2.53621	down	-	-
MW0149603	Glepidotin A	皂荚苷A；8-异戊烯高良姜素；8-(3，3-DMA）高良姜素；8-(3，3-二甲基烯丙基）高良姜素	Flavonoids	黄酮	Flavones	黄酮	C20H18O5	3	0.6927	42193-83-9	13036.8	11758.2	3766.82	4505.79	2964.53	3543.97	1.01252	0.178612	0.338323	2.59316	1.37471	up	-	-
MW0052353	Digoxigenin	异羟基洋地黄毒苷元	Steroids	甾体	Cardiac glycoside	强心苷	C23H34O5	3	0.6902	1672-46-4	32921.3	40903.7	42224.3	86737.5	72793	239169	1.18531	0.218783	0.379213	0.291069	-1.78057	down	-	-
MW0107303	Histidylglycine	组氨酰甘氨酸	Amino acids and derivatives	氨基酸及其衍生物	Amino acids and derivatives	氨基酸及其衍生物	C8H12N4O3	3	0.6897	2578-58-7	5226.29	3594.34	5551.98	9201.21	8876.71	12243.6	1.31289	0.0206137	0.125682	0.474007	-1.07702	down	-	-
MW0049137	Cynarasaponin D	洋蓟皂苷D	Steroids	甾体	Steroid	甾体	C47H74O19	3	0.6895	117804-10-1	4551.66	4456.49	4414.18	375.09	1744.08	2487.02	1.08662	0.0410338	0.161093	2.91398	1.54299	up	-	-
MW0157231	Streptidine	链肽	Alcohol and amines	醇、胺类	Alcohols	醇类	C8H18N6O4	3	0.6887	85-17-6	265.72	699.41	1935.48	3369.76	2233.63	4345.02	1.11631	0.0428199	0.164883	0.291565	-1.77811	down	C00837	-
MEDP1332	LPC(20:3/0:0)	溶血磷脂酰胆碱(20:3/0:0)	Lipids	脂质	LPC	溶血磷脂酰胆碱	C28H52NO7P	3	0.6876	1199257-41-4	87114.5	60345.4	100816	32572	30833.9	30778	1.37508	0.0492651	0.175165	2.63607	1.39839	up	-	-
MW0008994	1-Cyclohexyl-3-phenylthiourea	1-环己基-3-苯基硫脲	Benzene and substituted derivatives	苯及其衍生物	Benzene and substituted derivatives	苯及其衍生物	C13H18N2S	3	0.6874	722-03-2 | 15093-57-9	3143.42	3309.63	3236.8	9613.78	7920.27	7422.59	1.42199	0.0161628	0.112789	0.388267	-1.36488	down	-	-
MW0017122	Ciprostene	环丙烯	Organic acids	有机酸	Organic acids	有机酸	C22H36O4	3	0.6869	81845-44-5	9378.28	15228.4	15914.8	40183.9	32619.9	33176.2	1.34975	0.00263891	0.0669726	0.382351	-1.38703	down	-	-
MW0015599	Agavoside B	龙舌兰苷B	Steroids	甾体	Steroidal saponins	甾体皂苷	C39H62O14	3	0.6867	56857-66-0	26806.9	21346.3	14123.2	5968.61	4808.69	2861.01	1.34783	0.0409644	0.16108	4.56628	2.19102	up	-	-
MW0055291	Geraniol	橙花醇	Terpenoids	萜类	Terpene	萜类	C10H18O	3	0.686	106-25-2	4888.86	7742	13362.7	24231.2	29785.6	23281.8	1.27721	0.00668908	0.0823271	0.336275	-1.57229	down	C09871	-
MW0054008	Ethyl icosapentate	（5Z，8Z，11Z，14Z，17Z)-二十碳五烯酸乙酯; EPA乙酯	Lipids	脂质	Free fatty acids	游离脂肪酸	C22H34O2	3	0.6845	86227-47-6	29225.1	36464.3	26459.9	5909.82	5452.3	10042.7	1.38496	0.00637542	0.0818674	4.30507	2.10604	up	C16184	-
MEDL01814	Batatasin I	山药素 I	Phenolic acids	酚酸类	Phenolic acids	酚酸类	C17H16O4	3	0.6835	51415-00-0	33316.2	19542.4	88217.5	11210.1	16942.4	14903.5	1.07336	0.259172	0.417214	3.27657	1.71219	up	C10246	-
MW0131145	3-(3,4-Dimethoxyphenyl)-6-methyl-4-phenylchromen-2-one	3-(3,4-二甲氧基苯基)-6-甲基-4-苯基色烯-2-one	Lignans and Coumarins	木脂素和香豆素	Coumarins	香豆素	C24H20O4	3	0.6826	720675-47-8	976.81	379.23	427.59	8014.72	9443.98	626.33	1.03261	0.18448	0.343218	0.0986247	-3.34191	down	-	-
MW0150666	Guattegaumerine	N，N′-二甲基吲哚胺	Heterocyclic compounds	杂环化合物	Heterocyclic compounds	杂环化合物	C36H40N2O6	3	0.6822	21446-35-5	18416	32984.2	23390.8	68069.8	68731.4	68020.6	1.3716	0.00943358	0.0924361	0.365152	-1.45343	down	C06511	ko00950
ZINC85529959	Methoxyadiantifoline	甲氧基二反式叶林	Alkaloids	生物碱	Alkaloids	生物碱	C43H52N2O10	3	0.682	115452-09-0	13799.8	6590.66	14604.3	59652.7	71562.6	49103	1.36774	0.00953619	0.0929578	0.194072	-2.36533	down	-	-
MW0156453	Ryanodine	瑞安定	Terpenoids	萜类	Ditepenoids	二萜	C25H35NO9	3	0.6808	15662-33-6	12635.4	52850	82597.2	341803	538488	550085	1.30248	0.0174207	0.117318	0.103527	-3.27192	down	-	-
MW0104392	beta-D-Glucose pentaacetate	β-D-葡萄糖五乙酸酯	Others	其它类	Ketone compounds	酮类化合物	C16H22O11	3	0.6797	3891-59-6	4120.93	1813.59	3414.91	12008.3	12936.5	6658.04	1.27434	0.0504842	0.176982	0.295841	-1.7571	down	-	-
MW0126367	Queuine	奎因	Alkaloids	生物碱	Alkaloids	生物碱	C12H15N5O3	3	0.6777	72496-59-4 | 69565-92-0	183939	65977.9	73882.4	33091.3	28771.3	23998.5	1.26043	0.172047	0.330696	3.7712	1.91502	up	C01449	-
MW0121600	5-Methoxytryptophol	5-甲氧色氨酸	Amino acids and derivatives	氨基酸及其衍生物	Amino acids and derivatives	氨基酸及其衍生物	C11H13NO2	3	0.6771	712-09-4	28815.6	33692.9	37308.9	8894.38	6318.01	6739.84	1.42372	0.00501536	0.0781934	4.54703	2.18492	up	-	-
MW0125495	N,N-Diethyl-2-[(2-Thienylcarbonyl)amino]-4,5,6,7-Tetrahydro-1-Benzothiophene-3-Carboxamide	N,N-Diethyl-2-[(2-Thienylcarbonyl)amino]-4,5,6,7-Tetrahydro-1-Benzothiophene-3-Carboxamide	Alcohol and amines	醇、胺类	Amines	胺类	C18H22N2O2S2	3	0.6766	301321-93-7	3357.22	4087.65	7156.01	13903.9	11773.7	12874.9	1.30812	0.00868676	0.0888327	0.378728	-1.40077	down	-	-
MW0015702	alpha-Hederin	3-O-鼠李糖基(1→2)阿拉伯糖基-23-羟基齐墩果-12-烯-28-酸 (木通皂苷Stc;刺楸根皂苷A;无患子皂苷A)	Terpenoids	萜类	Triterpene Saponin	三萜皂苷	C41H66O12	3	0.6765	27013-91-8 | 104748-88-1	24964.3	29239.1	32556.3	79083	64022.3	80970.6	1.40506	0.00648579	0.0818674	0.387189	-1.36889	down	C08954	-
MW0112967	4-(Methylnitrosamino)-1-(3-pyridyl)-1-butanone	4-(甲基亚硝基氨基)-1-(3-吡啶基)-1-丁酮	Others	其它类	Ketone compounds	酮类化合物	C10H13N3O2	3	0.6761	64091-91-4	3096.14	6689.73	3466.61	8536.13	10342.8	20506.8	1.20321	0.134732	0.290651	0.336479	-1.57141	down	C16453	-
MW0003896	3-Butynyl p-toluenesulfonate	3-对甲苯磺酸丁炔酯	Benzene and substituted derivatives	苯及其衍生物	Benzene and substituted derivatives	苯及其衍生物	C11H12O3S	3	0.6758	23418-85-1	15548.7	5485.27	12831.9	50200.3	62772.1	59986.9	1.34668	0.000864603	0.0527544	0.195802	-2.35253	down	-	-
MEDP1230	Glycidyl oleate	Glycidyl oleate	GL	甘油脂类	MG	单甘油酯	C21H38O3	3	0.6757	5431-33-4	67376.7	64590.4	66334.8	27573.6	26056.3	11528.9	1.30319	0.0114654	0.101883	3.04336	1.60567	up	C19426	-
MEDN0057	N-Acetyl-L-tyrosine	乙酰基L-酪氨酸	Amino acids and derivatives	氨基酸及其衍生物	Amino acids and derivatives	氨基酸及其衍生物	C11H13NO4	3	0.674	537-55-3	31254.9	35935.4	31424.1	70814.7	72480.9	63830	1.42462	0.000949019	0.0541062	0.476109	-1.07064	down	C01657	-
MW0122710	9-Methyluric acid	9-甲基尿酸	Organic acids	有机酸	Organic acids	有机酸	C6H6N4O3	3	0.6726	55441-71-9	45050.8	61850	67686.7	7937.42	5895.88	17886.7	1.34391	0.0078552	0.0851592	5.50402	2.46049	up	-	-
MEDL01869	Methylgingerol	甲基-[6]-姜酚	Phenolic acids	酚酸类	Phenolic acids	酚酸类	C18H28O4	3	0.6724	61914-52-1	6648.3	4653.79	378.99	49768.9	60170.1	59629.7	1.26396	0.000717477	0.0506524	0.068887	-3.85962	down	-	-
MW0138459	Isobavachalcone	补骨脂乙素	Flavonoids	黄酮	Chalcones	查耳酮	C20H20O4	3	0.6706	20784-50-3 | 54676-49-2	15994.6	10571	11166.7	6699.41	4134.01	5374.66	1.31445	0.0370748	0.15591	2.32799	1.21909	up	C08648	-
MW0002202	2,4,6-Trihydroxybenzophenone	2，4，6-三羟基二苯甲酮	Others	其它类	Others	其它	C13H10O4	3	0.6704	3555-86-0	29638.6	19703.4	21778.9	10982.8	9891.15	4188.16	1.24093	0.0178122	0.118408	2.83779	1.50477	up	C06356	-
MW0115331	Swertiamarin	獐牙菜苦苷	Terpenoids	萜类	Monoterpenoids	倍萜	C16H22O10	3	0.6698	17388-39-5	24230.9	22682.5	25317.5	12638.6	8142.49	11605.4	1.36792	0.00282009	0.0669726	2.23028	1.15723	up	C09800	-
MEDP1391	O-linoleyl-L-carnitine	O-亚油基-L-肉碱	FA	脂肪酰类	CAR	酰基肉碱	C25H45NO4	3	0.6696	36816-10-1	480544	208015	233882	124527	124617	74252.1	1.22134	0.143738	0.300696	2.85236	1.51215	up	-	-
MW0116071	gamma-Nonanolactone	γ-壬内酯	Heterocyclic compounds	杂环化合物	Heterocyclic compounds	杂环化合物	C9H16O2	3	0.6657	63357-97-1	4915.09	3748.12	11037.7	15778.4	16399	72638.1	1.12682	0.27035	0.426041	0.187958	-2.41152	down	C08501	-
MW0108624	Acetylglutamine	N-乙酰谷氨酰胺	Amino acids and derivatives	氨基酸及其衍生物	Amino acids and derivatives	氨基酸及其衍生物	C7H12N2O4	3	0.6643	2490-97-3	10359.5	17812.3	12600.7	60190	29620.1	92523.7	1.28119	0.11963	0.273709	0.223614	-2.16091	down	-	-
MW0052770	Etretinate	依曲坦	Others	其它类	Lactones	内酯类化合物	C23H30O3	3	0.6643	54350-48-0	2613.59	1605.91	645.42	5451.45	5348.24	15809	1.2233	0.168879	0.327658	0.182832	-2.45141	down	-	-
MEDL02553	Piperine	胡椒碱	Alkaloids	生物碱	Piperidine alkaloids	哌啶类生物碱	C17H19NO3	3	0.6642	94-62-2	5227.26	7147.06	2227.22	10088.3	12437.9	12973.8	1.17844	0.0208045	0.125858	0.411311	-1.2817	down	C03882	ko00960
MEDP0540	Dihydrobiopterin	7,8-二氢-L-生物蝶呤	Heterocyclic compounds	杂环化合物	Pteridines and derivatives	蝶啶及其衍生物	C9H13N5O3	3	0.6629	6779-87-9	27133.6	39922.1	44360.9	15324.5	20801.7	18959.1	1.29046	0.0571818	0.185023	2.02262	1.01623	up	C02953	ko00790,ko01100,ko01240
MEDP2301	Esculentoside A	商陆皂苷 A	Terpenoids	萜类	Triterpene Saponin	三萜皂苷	C42H66O16	3	0.6628	65497-07-6	66759.8	116564	142537	49736.6	53817.5	49958.3	1.21627	0.122277	0.276359	2.1227	1.0859	up	-	-
MW0169580	N-undecanoyl-L-Homoserine lactone	N-十一烷酰基-L-高丝氨酸内酯	Others	其它类	Lactones	内酯类化合物	C15H27NO3	3	0.6623	216596-71-3	48182.5	39698.2	47654.2	32625.1	25634.1	8703.64	1.0346	0.0695109	0.206139	2.02403	1.01723	up	-	-
MEDN0834	O-Succinyl-L-Homoserine	O-琥珀酰-L-高丝氨酸	Amino acids and derivatives	氨基酸及其衍生物	Amino acids and derivatives	氨基酸及其衍生物	C8H13NO6	3	0.6615	1492-23-5	40322.3	61724.7	45029.9	104139	119358	111951	1.37586	0.00223347	0.0669726	0.438451	-1.18951	down	C01118	ko00270,ko00920,ko01100,ko01110,ko01230
MEDP0664	Tyrosine methylester	L-酪氨酸甲酯	Amino acids and derivatives	氨基酸及其衍生物	Amino acids and derivatives	氨基酸及其衍生物	C10H13NO3	3	0.6604	1080-06-4	1993.85	3769.46	3227.01	15829	24121.6	31231.1	1.39355	0.0414591	0.161928	0.126301	-2.98506	down	C03404	-
MEDL00375	Oglufanide	谷氨酰色氨酸	Amino acids and derivatives	氨基酸及其衍生物	Amino acids and derivatives	氨基酸及其衍生物	C16H19N3O5	3	0.6599	38101-59-6	885603	616874	636009	365688	335699	320715	1.36572	0.0471983	0.17244	2.09224	1.06505	up	-	-
MW0014757	5-Geranyloxy-7-methoxycoumarin	5-香叶氧基-7-甲氧基香豆素	Lignans and Coumarins	木脂素和香豆素	Coumarins	香豆素	C20H24O4	3	0.6591	7380-39-4	20317.8	23251.8	15435.4	48255	47559.4	51903.2	1.3976	0.00106556	0.0554745	0.399445	-1.32393	down	-	-
MW0114621	Indican	靛苷	Alkaloids	生物碱	Plumerane	吲哚类生物碱	C14H17NO6	3	0.6589	487-60-5	43736.4	53920.8	46616.6	20644.7	28943.5	15549.8	1.30962	0.00700698	0.0827287	2.21489	1.14724	up	-	-
MW0111194	N-Butylaniline	正丁基苯胺	Alcohol and amines	醇、胺类	Polyamines	多胺	C10H15N	3	0.6588	1126-78-9 | 120743-27-3	610046	561468	577396	1.29515e+06	1.1735e+06	1.33185e+06	1.43286	0.00268115	0.0669726	0.460179	-1.11973	down	-	-
MW0141385	13-Hydroxy-6,9,11-octadecatrienoic acid	13-羟基-6,9,11-十八碳三烯酸	Lipids	脂质	Free fatty acids	游离脂肪酸	C18H30O3	3	0.6575	74784-20-6	9259.48	1359.45	15159.9	22983.7	19694.7	107817	1.02126	0.285211	0.439369	0.171293	-2.54546	down	-	-
MEDN1410	N-Palmitoylglycine	N-棕榈酰甘氨酸	Amino acids and derivatives	氨基酸及其衍生物	Amino acids and derivatives	氨基酸及其衍生物	C18H35NO3	3	0.6551	158305-64-7	55252.4	67463.3	53128.1	1570.16	365.73	381.74	1.41158	0.00560527	0.0790937	75.8723	6.2455	up	-	-
MW0126293	Pyrazinamide	吡嗪酰胺	Organic acids	有机酸	Organic acids	有机酸	C5H5N3O	3	0.6539	98-96-4	712.62	2730.36	2412.24	25742.5	33709.7	32278.7	1.37956	0.00490959	0.0774038	0.0638304	-3.96961	down	C01956	-
MW0010059	Vialinin A	Vialinin A	Benzene and substituted derivatives	苯及其衍生物	Benzene and substituted derivatives	苯及其衍生物	C34H26O8	3	0.6532	858134-23-3	269.56	1700.63	1311.89	5703.79	10205.3	4103.92	1.2145	0.0855988	0.228526	0.163997	-2.60826	down	-	-
MEDN0658	Hexadecanedioic acid	十六烷二酸	Lipids	脂质	Free fatty acids	游离脂肪酸	C16H30O4	3	0.6525	505-54-4	28833.9	48264.8	27019	75813.8	86023.2	244951	1.20502	0.205195	0.364651	0.255951	-1.96606	down	C19615	ko00073,ko01100
MW0146894	(3S,8S,9R,10R,13R,14S,17R)-17-[(2R)-5,6-dihydroxy-6-methylheptan-2-yl]-3-hydroxy-4,4,9,13,14-pentamethyl-1,2,3,7,8,10,12,15,16,17-decahydrocyclopenta[a]phenanthren-11-one	苔藓豆甙元	Others	其它类	Ketone compounds	酮类化合物	C30H50O4	3	0.6493	4965-97-3	13577.4	44652.1	22667.5	54898.6	53942.2	63116.9	1.12654	0.0699449	0.206139	0.470447	-1.0879	down	C08789	-
MW0002730	2-Aminobenzenecarbothioamide	2-氨基苯硫代酰胺	Benzene and substituted derivatives	苯及其衍生物	Benzene and substituted derivatives	苯及其衍生物	C7H8N2S	3	0.6483	2454-39-9	1242.71	968.38	1563.6	8297.89	9214.34	9985.11	1.42554	0.00158759	0.0596812	0.137275	-2.86486	down	-	-
MW0159352	Vindoline	文多灵碱	Alkaloids	生物碱	Plumerane	吲哚类生物碱	C25H32N2O6	3	0.6471	2182-14-1 | 57794-53-3	170.86	3221.5	243.43	8499.33	11310.1	16779	1.23747	0.0314345	0.146498	0.0993699	-3.33105	down	-	-
Lmhp001461	Pro-leu	L-脯氨酰-L-亮氨酸	Amino acids and derivatives	氨基酸及其衍生物	Amino acids and derivatives	氨基酸及其衍生物	C11H20N2O3	3	0.6471	52899-07-7	1505.62	2405.27	3341.67	15279.2	17937.2	13877.2	1.39557	0.00284737	0.0669726	0.154003	-2.69897	down	-	-
MW0124073	Eucatropine	桉树素	Heterocyclic compounds	杂环化合物	Heterocyclic compounds	杂环化合物	C17H25NO3	3	0.6465	100-91-4	2.35382e+06	1.69573e+06	2.12706e+06	124985	14351.1	15536.1	1.36693	0.00742856	0.0840695	39.8821	5.31767	up	-	-
MW0150673	Gymnemic acid I	匙羹藤酸I	Organic acids	有机酸	Organic acids	有机酸	C43H66O14	3	0.6462	122168-40-5	105563	71565.5	61232.8	54667.2	31329	12849	1.07681	0.0621496	0.192378	2.41146	1.2699	up	C08947	-
MW0061026	Pentadecanal	十五烷醛	FA	脂肪酰类	Others	其它	C15H30O	3	0.6457	2765-11-9	24542.6	27748.5	34971.6	60540.7	75788.1	276145	1.16418	0.258866	0.417165	0.21156	-2.24086	down	C01948	-
MW0008850	N-Arachidonoyl dopamine	花生四烯酸多巴胺	Phenolic acids	酚酸类	Phenolic acids	酚酸类	C28H41NO3	3	0.6449	199875-69-9	142655	140534	193005	60875.3	65758.6	37579.4	1.35334	0.0127761	0.104116	2.89985	1.53598	up	-	-
MW0143014	3-Ketosucrose	3-酮蔗糖；3-脱氢-α-D-葡萄糖基-β-D-呋喃果糖苷	Others	其它类	Saccharides	糖类	C12H20O11	3	0.6442	1883-12-1	2448.84	11878.6	8566.04	17195.6	15076.9	17794.2	1.0192	0.0713551	0.208379	0.45726	-1.12891	down	C05731	ko00500
MW0007219	Frangulin A	弗兰古林A	Benzene and substituted derivatives	苯及其衍生物	Benzene and substituted derivatives	苯及其衍生物	C21H20O9	3	0.6441	521-62-0	17903.1	23017.6	22490.5	7177.22	6572.1	8934.74	1.4048	0.00634258	0.0818674	2.79541	1.48306	up	-	-
MEDL01845	Homodihydrocapsaicin	高二氢辣椒碱 I	Alkaloids	生物碱	Phenolamine	酚胺	C19H31NO3	3	0.6396	20279-06-5	26569.2	39422.5	19989.7	14076.4	15070.2	8365.24	1.20112	0.0916697	0.237487	2.29212	1.19668	up	-	-
MW0137619	Catechin pentaacetate	儿茶素五乙酸酯	Others	其它类	Lactones	内酯类化合物	C25H24O11	3	0.6388	16198-01-9	13828.1	27028.3	16098.1	9599.55	11553.3	7160.83	1.16412	0.133992	0.289847	2.01155	1.00831	up	-	-
MW0115078	Paederoside	鸡矢藤苷	Terpenoids	萜类	Monoterpenoids	倍萜	C18H22O11S	3	0.6387	20547-45-9	6167.54	5406.17	12092	31441.8	13866.4	41181.5	1.20465	0.111695	0.26469	0.273625	-1.86973	down	C09795	-
MEDP1390	Carnitine C18:1(Acylcarnitine C18:1)	肉碱 C18:1	FA	脂肪酰类	CAR	酰基肉碱	C25H47NO4	3	0.6381	38677-66-6	73552	61700.5	72343.5	29181.2	24329.4	24921.3	1.42445	0.00308755	0.0680309	2.64683	1.40427	up	-	-
ZINC15262412	Gnetupendin A	Gnetupendin A	Others	其它类	Stilbene	茋类	C22H20O5	3	0.6358	382137-56-6	5070.76	8817.05	5610.46	20166.7	16236.4	33690.7	1.32347	0.0794461	0.219423	0.278174	-1.84594	down	-	-
ZINC4831363	Digitoxose	毛地黄酮糖	Others	其它类	Saccharides	糖类	C6H12O4	3	0.6357	45742-39-0	128779	126955	72062	13639.7	41928	17262.3	1.29096	0.0282433	0.140311	4.50084	2.17019	up	-	-
MEDL01930	Bis-ferulamidobutane	N,N'-二阿魏酰腐胺	Alkaloids	生物碱	Phenolamine	酚胺	C24H28N2O6	3	0.6355	42369-86-8	28678.8	23990.8	16988.7	8345.24	13545.8	12491.1	1.22593	0.0559567	0.183972	2.026	1.01864	up	-	-
MW0117665	2-{5H,6H,7H,8H,9H-[1,2,4]triazolo[4,3-a]azepin-3-yl}ethanethioamide	2-{5H,6H,7H,8H,9H-[1,2,4]三唑并[4,3-a]azepin-3-yl}ethanethioamide	Alcohol and amines	醇、胺类	Amines	胺类	C9H14N4S	3	0.6354	328029-00-1	12325.8	10749.1	12370.1	22755.6	30238	20192.2	1.35642	0.0490195	0.174862	0.484316	-1.04598	down	-	-
MW0152134	2-O-alpha-D-Glucopyranosyl-L-ascorbic acid	L-抗坏血酸-2-葡萄糖苷；AA-2G	FA	脂肪酰类	Others	其它	C12H18O11	3	0.6351	129499-78-1	52343.9	39248.6	54482.3	17490.3	16954.8	19198.8	1.40998	0.0212887	0.126559	2.72305	1.44522	up	C18339	-
MW0002600	N-(4-Hydroxy-3,5-dimethoxybenzoyl)glycine	2-{[羟基（4-羟基-3，5-二甲氧基苯基）亚甲基]氨基}乙酸	Benzene and substituted derivatives	苯及其衍生物	Benzene and substituted derivatives	苯及其衍生物	C11H13NO6	3	0.63	62098-75-3	771.84	169.19	597.4	6704.73	6825.79	9737.37	1.36617	0.0158058	0.112032	0.0661182	-3.91881	down	-	-
MEDL02640	Chrysosplenol D	猫眼草酚 D	Flavonoids	黄酮	Flavones	黄酮	C18H16O8	3	0.6299	14965-20-9	6682.63	17183.6	17488.7	50712.6	59550.6	86521.7	1.31933	0.0305914	0.1458	0.210153	-2.25049	down	C04552	-
MW0063385	Rubusoside	悬钩子苷	Terpenoids	萜类	Terpene	萜类	C32H50O13	3	0.6267	64849-39-4	9061.7	5188.65	2674.13	58493.3	47563.7	31077.8	1.35794	0.0318127	0.146876	0.123415	-3.01841	down	-	-
MW0105527	L-Alanyl-L-methionine	L-丙氨酰-L-蛋氨酸	Amino acids and derivatives	氨基酸及其衍生物	Amino acids and derivatives	氨基酸及其衍生物	C8H16N2O3S	3	0.6224	14486-05-6	3233.57	10511.7	6638.91	12234.1	12482.9	25458.4	1.08047	0.136714	0.29206	0.406258	-1.29953	down	-	-
MW0148472	Diginatin	Diginatigenin3-O-tridigitoxoside	Steroids	甾体	Steroid	甾体	C41H64O15	3	0.6215	52589-12-5	62245.1	71121.4	33728	17066.6	24971.4	8351.76	1.21455	0.0581234	0.185995	3.31604	1.72946	up	C08861	-
MW0000022	(+/-)-6-Acetonyldihydrochelerythrine	6-丙酮基二氢白屈菜红碱	Alkaloids	生物碱	Isoquinoline alkaloids	异喹啉类生物碱	C24H23NO5	3	0.6207	22864-92-2	121188	103390	112734	54265.9	54064.1	57197.2	1.42873	0.00632489	0.0818674	2.0378	1.02702	up	-	-
MW0159351	Vinblastine	长春花碱	Alkaloids	生物碱	Plumerane	吲哚类生物碱	C46H58N4O9	3	0.6205	865-21-4	100226	131266	132604	53659.1	68692.4	50445.4	1.36213	0.012447	0.103688	2.10707	1.07524	up	-	-
MEDP1294	Leu-Gly	L-亮氨酰-L-甘氨酸	Amino acids and derivatives	氨基酸及其衍生物	Amino acids and derivatives	氨基酸及其衍生物	C8H16N2O3	3	0.6198	686-50-0	375.09	3124.52	118.42	3534.16	3800.87	6465.64	1.07371	0.0647928	0.19818	0.262163	-1.93146	down	-	-
MW0156616	Sennoside D	番泻苷D	Benzene and substituted derivatives	苯及其衍生物	Benzene and substituted derivatives	苯及其衍生物	C42H40O19	3	0.618	37271-17-3	820.71	1334.27	2396.48	9183.45	14510.5	9658.48	1.36603	0.0235537	0.13157	0.136466	-2.87339	down	-	-
ZINC28972272	Kadsulignan E	南五味子甲素	Benzene and substituted derivatives	苯及其衍生物	Benzene and substituted derivatives	苯及其衍生物	C31H30O11	3	0.6167	142674-80-4	1650.3	8272.51	6315.18	344.42	1481.58	1532.62	1.07675	0.155945	0.315837	4.83472	2.27343	up	-	-
MEDL02636	Ephedrine	麻黄碱	Alkaloids	生物碱	Alkaloids	生物碱	C10H15NO	3	0.6139	299-42-3	492800	463132	461127	819835	1.04261e+06	1.09421e+06	1.39997	0.0244676	0.133887	0.479278	-1.06107	down	C01575	ko00996,ko01100,ko01110
MEDP1217	3-Methyl-4-pentenoic acid	3-甲基-4-戊烯酸	Organic acids	有机酸	Organic acids	有机酸	C6H10O2	3	0.6136	1879-03-4	11994.5	15699.6	19161.3	235412	193563	254395	1.43149	0.00653086	0.0818674	0.068565	-3.86638	down	-	-
MW0145611	Arg-Tyr	精氨酸-酪氨酸	Amino acids and derivatives	氨基酸及其衍生物	Amino acids and derivatives	氨基酸及其衍生物	C15H23N5O4	3	0.6128	74863-12-0	339125	263579	200056	136175	92908.4	110178	1.31561	0.0508497	0.176982	2.3662	1.24257	up	-	-
MW0138479	Isoginkgetin	异银杏黄素	Flavonoids	黄酮	Biflavones	双黄酮	C32H22O10	3	0.6116	548-19-6	280.87	430.01	691.19	5433.85	6549.08	2863.45	1.37699	0.0529145	0.180798	0.0944385	-3.40448	down	-	-
MW0006870	Dimoxystrobin	双氧嘧啶	Benzene and substituted derivatives	苯及其衍生物	Benzene and substituted derivatives	苯及其衍生物	C19H22N2O3	3	0.61	149961-52-4	760.55	1944.9	1895.54	5961.28	5870.28	2729.66	1.18687	0.0750751	0.212537	0.315976	-1.66212	down	-	-
MW0000905	[12]-Gingerol	[12]-姜酚	Phenolic acids	酚酸类	Phenolic acids	酚酸类	C23H38O4	3	0.6094	104264-55-3	22562	34394.9	17751.4	6062.21	3286.06	4496.55	1.37524	0.0512643	0.177248	5.39613	2.43192	up	-	-
MEDN0010	Citrulline	L-瓜氨酸	Amino acids and derivatives	氨基酸及其衍生物	Amino acids and derivatives	氨基酸及其衍生物	C6H13N3O3	3	0.609	372-75-8	817872	796677	1.28557e+06	460711	309274	328837	1.33796	0.0539303	0.18199	2.6393	1.40015	up	C00327	ko00220,ko01100,ko01110,ko01230
MEDN0669	5-KETE	5-氧代-6E,8Z,11Z,14Z-二十碳四烯酸	Lipids	脂质	Free fatty acids	游离脂肪酸	C20H30O3	3	0.6088	126432-17-5	8058.15	15261.3	7263.33	26756.9	27962.2	81460.5	1.23276	0.188139	0.346966	0.224577	-2.15472	down	C14732	ko00590,ko01100
MEDP0285	2,6-Diaminooimelic Acid	2,6-二氨基庚二酸	Organic acids	有机酸	Organic acids	有机酸	C7H14N2O4	3	0.6081	583-93-7	354974	383781	392350	1.16169e+06	572477	773590	1.26245	0.116884	0.270274	0.451042	-1.14867	down	C00666	ko00300,ko00470,ko01100,ko01110,ko01230
MW0008806	N(4)-Acetylsulfadiazine	N-乙酰磺胺嘧啶	Benzene and substituted derivatives	苯及其衍生物	Benzene and substituted derivatives	苯及其衍生物	C12H12N4O3S	3	0.6073	127-74-2 | 5572-57-6	561.12	3995.73	3271.94	7175.92	9876.78	12181.4	1.11847	0.0194101	0.123571	0.267796	-1.90079	down	-	-
MEDP1003	Benzeneethanamine, N-hydroxy-	羟苯乙胺	Benzene and substituted derivatives	苯及其衍生物	Benzene and substituted derivatives	苯及其衍生物	C8H11NO	3	0.606	3217-93-4	7185.69	8986.98	7809.72	16772	18891.2	22504.7	1.40234	0.0142716	0.10838	0.412296	-1.27825	down	-	-
MW0012774	1-Eicosanoyl-sn-glycero-3-phosphocholine	溶血磷脂酰胆碱 20:0	Lipids	脂质	LPC	溶血磷脂酰胆碱	C28H58NO7P	3	0.6053	108341-80-6	235773	884977	710965	374771	125987	145384	1.00358	0.167828	0.32652	2.83485	1.50327	up	C04230	ko00564
MW0104028	(S)-Ureidoglycolic acid	（S)-脲基乙醇酸	Organic acids	有机酸	Organic acids	有机酸	C3H6N2O4	3	0.6043	7424-03-5	4154.9	1535.15	6189.12	11617.9	7681.57	6923.57	1.02955	0.0738229	0.211574	0.453005	-1.1424	down	C00603	ko00230,ko01100
MW0115897	(3R)-3-{[6-(4-methylphenyl)pyridin-3-yl]oxy}-1-azabicyclo[2.2.2]octane	(3R)-3-{[6-(4-甲基苯基)吡啶-3-基]氧基}-1-氮杂双环[2.2.2]辛烷	Alkaloids	生物碱	Pyridine alkaloids	吡啶类生物碱	C19H22N2O	3	0.6029	669770-29-0	721.38	771.14	277.73	1573.97	1738.85	2981.84	1.25314	0.0637168	0.195792	0.28123	-1.83018	down	-	-
MW0010655	Secoisolariciresinol diglucoside	开环异落叶松树脂酚二葡萄糖苷	Lignans and Coumarins	木脂素和香豆素	Lignans	木脂素	C32H46O16	3	0.6028	158932-33-3 | 148244-82-0	99241.4	66752.1	105250	58205.6	34592.5	33641.8	1.24716	0.034963	0.152228	2.14523	1.10113	up	-	-
MW0148595	Discodermolide	Discodermolide	Alcohol and amines	醇、胺类	Amines	胺类	C33H55NO8	3	0.6	127943-53-7	7191.04	6082.53	2223.59	1550.76	2259.17	537.91	1.08892	0.121072	0.27484	3.56434	1.83363	up	-	-
MW0150278	Glutinone	粘蛋白；阿尔努塞诺内	Others	其它类	Ketone compounds	酮类化合物	C30H48O	3	0.5992	508-09-8	208793	229788	172245	420003	498212	438942	1.40345	0.00155681	0.0596812	0.450078	-1.15175	down	C16967	-
MW0111384	12-Hydroxy-6-epi-albrassitriol	12-Hydroxy-6-epi-albrassitriol	Alcohol and amines	醇、胺类	Alcohols	醇类	C15H26O4	3	0.5984	178330-78-4	20328.9	11851.8	16246.5	7130.44	5465.21	5682.9	1.35366	0.0490488	0.174862	2.6494	1.40566	up	-	-
MW0154453	N-Formyldemecolcine	N-甲酰脱氧二甲基甘氨酸	Benzene and substituted derivatives	苯及其衍生物	Benzene and substituted derivatives	苯及其衍生物	C22H25NO6	3	0.5975	14686-61-4	83975.1	79790.1	87119.9	191240	231379	207736	1.42978	0.00689338	0.0824364	0.398007	-1.32914	down	-	-
MW0052467	N-[(E,2S,3R)-1,3-dihydroxyoctadec-4-en-2-yl]-12-[(4-nitro-2,1,3-benzoxadiazol-7-yl)amino]dodecanamide	N-[(E,2S,3R)-1,3-dihydroxyoctadec-4-en-2-yl]-12-[(4-nitro-2,1,3-benzoxadiazol-7-yl)amino]十二酰胺	Benzene and substituted derivatives	苯及其衍生物	Benzene and substituted derivatives	苯及其衍生物	C36H61N5O6	3	0.5971	202850-01-9	15945.3	20233.7	7020.32	26533.7	57147.2	57333.7	1.2025	0.0713609	0.208379	0.306346	-1.70676	down	-	-
MW0009275	Orteronel	奥特罗内尔	Benzene and substituted derivatives	苯及其衍生物	Benzene and substituted derivatives	苯及其衍生物	C18H17N3O2	3	0.597	566939-85-3	19695	33268.5	22429.3	10448.8	10835.9	8284.97	1.34337	0.0616446	0.191789	2.54967	1.35031	up	-	-
MW0061611	Phorbol 12-myristate 13-acetate	12-O-十四酰基佛波醇13-乙酸酯	Heterocyclic compounds	杂环化合物	Heterocyclic compounds	杂环化合物	C36H56O8	3	0.5958	16561-29-8 | 11016-13-0	12460.6	22120.6	23707.6	38516	47810.7	45963.1	1.28589	0.00619553	0.0818674	0.440615	-1.18241	down	C05151	-
MW0127359	5-[(Pyridin-2-ylmethyl)thio]-1,3,4-thiadiazol-2-amine	5-[(Pyridin-2-ylmethyl)thio]-1,3,4-thiadiazol-2-amine	Alcohol and amines	醇、胺类	Amines	胺类	C8H8N4S2	3	0.5953	118159-54-9	1682.51	1658.82	1244.62	3956.89	4023.17	3946.98	1.41624	0.00270314	0.0669726	0.3845	-1.37894	down	-	-
MW0008211	N-(3-hydroxyphenyl)-Arachidonoyl amide	N-(3-羟苯基)-花生酰胺	Benzene and substituted derivatives	苯及其衍生物	Benzene and substituted derivatives	苯及其衍生物	C26H37NO2	3	0.5945	183718-75-4	5708.78	10671.6	7144.99	28479.5	37994.7	115615	1.29533	0.195222	0.355324	0.129197	-2.95236	down	-	-
MW0140172	1,2-Didecanoylglycerol	1,2-二癸酰基甘油	GL	甘油脂类	MG	单甘油酯	C23H44O5	3	0.5909	82950-64-9 | 17863-69-3	38743.9	26926	26675.7	171883	226040	226888	1.42571	0.00799534	0.0860751	0.147798	-2.7583	down	-	-
MEDL00817	Cysteinylglycine	半胱氨酰-甘氨酸	Amino acids and derivatives	氨基酸及其衍生物	Amino acids and derivatives	氨基酸及其衍生物	C5H10N2O3S	3	0.5903	19246-18-5	179854	247915	270346	81847.3	64774	71185	1.40346	0.0245635	0.13393	3.20521	1.68042	up	C01419	ko00480,ko01100
MW0126590	N-[2-(5-Hydroxy-1H-indol-3-yl)ethyl]octadecanamide	硬脂酰5-羟色胺	Lipids	脂质	Free fatty acids	游离脂肪酸	C28H46N2O2	3	0.5899	67964-87-8	157058	181018	135868	41708.2	50884.9	39500.3	1.41887	0.00907616	0.0908707	3.58795	1.84316	up	-	-
MW0138892	Dihydrokawain	二氢醉椒素	Others	其它类	Lactones	内酯类化合物	C14H16O3	3	0.5885	587-63-3	260871	137436	218807	57052	69106.9	17075	1.23714	0.0333734	0.149491	4.30843	2.10716	up	-	-
MW0001307	5-[(4-Nitrophenyl)methylsulfanyl]-1,3,4-thiadiazol-2-amine	5-[(4-硝基苯基)甲基硫烷基]-1,3,4-噻二唑-2-胺	Benzene and substituted derivatives	苯及其衍生物	Benzene and substituted derivatives	苯及其衍生物	C9H8N4O2S2	3	0.588	72836-11-4	16965.9	39695.2	30149	9810.59	9384.42	13541.6	1.24196	0.106428	0.257604	2.65178	1.40696	up	-	-
MEDL01830	(1E)-1,7-bis(4-hydroxy-3-methoxyphenyl)hept-1-ene-3,5-dione	二氢姜黄素	Phenolic acids	酚酸类	Phenolic acids	酚酸类	C21H22O6	3	0.5864	76474-56-1	17662.4	18094.8	20535.6	9201.49	7258.19	1452.39	1.11303	0.0205817	0.125682	3.14273	1.65202	up	-	-
MW0000816	1-Phenyl-3-[(S)-1-benzyl-2-hydroxyethyl]urea	1-苯基-3-[(S)-1-苄基-2-羟乙基]脲	Benzene and substituted derivatives	苯及其衍生物	Benzene and substituted derivatives	苯及其衍生物	C16H18N2O2	3	0.5863	223600-53-1	10293.8	19706.6	14716	41467.2	26908.8	24797.1	1.2001	0.0714745	0.208493	0.479927	-1.05911	down	-	-
MEDP1170	9-Octadecenal	9-十八烯醛	Others	其它类	Aldehyde compounds	醛类化合物	C18H34O	3	0.5861	5090-41-5	52103.3	29035.5	38863.7	102092	114276	148524	1.35864	0.0146045	0.109687	0.328872	-1.6044	down	-	-
MW0108911	n-Ribosylhistidine	N-核糖基组氨酸	Amino acids and derivatives	氨基酸及其衍生物	Amino acids and derivatives	氨基酸及其衍生物	C11H17N3O6	3	0.5835	98379-91-0	6411.91	10219.8	9253.75	650.08	1826.43	2087.4	1.32435	0.0151873	0.11117	5.67177	2.5038	up	-	-
MW0137107	7-Methoxyflavanone	7-甲氧基黄烷酮	Others	其它类	Ketone compounds	酮类化合物	C16H14O3	3	0.5804	21785-09-1	8564.8	2146.05	4260.41	293.92	370.85	1112.59	1.27302	0.1428	0.299772	8.42331	3.07439	up	-	-
MW0151707	Iminoacetic acid	亚氨基乙酸	Organic acids	有机酸	Organic acids	有机酸	C2H3NO2	3	0.5801	4472-12-2	1518.95	1197.91	2206.54	4349.66	5525.72	7483.97	1.34836	0.0350857	0.152228	0.283617	-1.81799	down	-	-
MEDL02685	Butylphthalide	丁基苯酞	Others	其它类	Lactones	内酯类化合物	C12H14O2	3	0.5776	3413-15-8	20018.6	33328.9	12983.2	67116.1	53498.1	217134	1.19509	0.22537	0.384897	0.196391	-2.3482	down	C17854	-
MADN0548	Fmoc-L-leucine	Fmoc-L-亮氨酸	Amino acids and derivatives	氨基酸及其衍生物	Amino acids and derivatives	氨基酸及其衍生物	C21H23NO4	3	0.576	35661-60-0	10054.1	6373.29	8401.6	5104.78	3539.38	3549.75	1.28779	0.0399903	0.158838	2.03618	1.02587	up	-	-
MW0114522	Gilvocarcin V	褐黄癌菌素 V	Others	其它类	Others	其它	C27H26O9	3	0.573	77879-90-4	163809	105754	121408	52212.7	39452.2	48971.8	1.37919	0.035365	0.152792	2.78	1.47509	up	-	-
MW0151755	Inumakilactone A glycoside	菊粉内酯A糖苷	Others	其它类	Ketone compounds	酮类化合物	C24H30O13	3	0.5694	37850-48-9	24900.2	15706.9	12579.1	5925.39	7879.72	9817.11	1.21584	0.106286	0.257502	2.25153	1.17091	up	C09114	-
MW0116275	1-(2,3-Dihydro-1H-pyrrolizin-5-yl)-1-butanone	1-(2,3-Dihydro-1H-pyrrolizin-5-yl)-1-丁酮	Others	其它类	Ketone compounds	酮类化合物	C11H15NO	3	0.5674	97072-99-6	1158.81	1251.93	192.87	6089.76	8348.16	6703.96	1.28528	0.00405757	0.0723139	0.123149	-3.02152	down	-	-
MW0054028	Ipecoside	吐根甙	Others	其它类	Lactones	内酯类化合物	C27H35NO12	3	0.5644	15401-60-2	7592.72	7998.9	6752.12	2060.29	2114.52	2299.55	1.43462	0.00365141	0.0703011	3.45111	1.78706	up	C09464	-
MW0104821	2-O-Feruloylhydroxycitric acid	2-O-阿魏酰羟基柠檬酸	Phenolic acids	酚酸类	Phenolic acids	酚酸类	C16H16O11	3	0.5633	62345-86-2	16349.3	26871.5	29678.1	11579.2	7376.84	7448.78	1.30905	0.0499904	0.176211	2.76082	1.46509	up	-	-
MEDP0653	2-Propenoic acid, 3-phenyl-, phenylmethyl ester	肉桂酸苯甲酯	Benzene and substituted derivatives	苯及其衍生物	Benzene and substituted derivatives	苯及其衍生物	C16H14O2	3	0.5604	103-41-3 | 8014-16-2	12828.6	10811.4	9770.91	27091.6	23375.5	25195.2	1.4109	0.000637965	0.0506524	0.441578	-1.17926	down	-	-
MEDP1354	Mycosporine-serinol	霉菌素丝氨醇	Amino acids and derivatives	氨基酸及其衍生物	Amino acids and derivatives	氨基酸及其衍生物	C11H19NO6	3	0.5563	59719-29-8	52703.6	39128.5	60941.3	24970.8	24224	25212.2	1.35529	0.054176	0.182385	2.05321	1.03788	up	C10607	-
MEDL02634	2,3,5,6-Tetramethylpyrazine	2,3,5,6-四甲基吡嗪; 川芎嗪	Alkaloids	生物碱	Alkaloids	生物碱	C8H12N2	3	0.5551	1124-11-4	6171.68	6892.66	19601.3	1078.37	1791.71	2066.08	1.31049	0.167621	0.32652	6.61762	2.72631	up	-	-
MW0014223	C20 Sulfatide	C20 硫苷	SL	鞘脂类	Cer	神经酰胺	C44H85NO11S	3	0.5537	265096-81-9	93395.8	62186.4	53927.8	19883	28527.5	11775.3	1.3006	0.0391028	0.158322	3.48106	1.79953	up	C06125	ko00600,ko01100
MW0152714	Levisoprenaline	左丙肾上腺素	Phenolic acids	酚酸类	Phenolic acids	酚酸类	C11H17NO3	3	0.5474	51-31-0	2286.63	4630.45	5313.17	11750.2	17945	26101.2	1.3105	0.0668282	0.201352	0.219194	-2.18972	down	-	-
ZINC85530008	7-O-Methylaloeresin A	7-O-甲基芦荟树脂 A	Others	其它类	Chromone	色酮类	C29H30O11	3	0.5469	329361-25-3	22979	27688	29207.9	225.04	289.45	22.26	1.38225	0.00492521	0.0774038	148.812	7.21735	up	-	-
MW0117133	1'H-spiro[cyclopentane-1,2'-quinazolin]-4'(3'H)-one	1'H-螺[环戊烷-1,2'-喹唑啉]-4'(3'H)-one	Others	其它类	Ketone compounds	酮类化合物	C12H14N2O	3	0.5389	1135-80-4	1944.73	3477.7	2514.43	11052.4	10025.1	10123.5	1.4011	0.000259028	0.040063	0.254378	-1.97495	down	-	-
MW0168465	1-Methylnicotinamide	3-氨基甲酰-1-甲基氧化吡啶	Alkaloids	生物碱	Pyridine alkaloids	吡啶类生物碱	C7H9N2O+	3	0.5353	3106-60-3	29587.7	19864.5	10484.3	121875	96896	125414	1.36867	0.00191544	0.0630331	0.17414	-2.52168	down	C02918	ko00760,ko01100
MEDL02627	Melilotocarpan D	左旋白香草木犀紫檀酚 D	Phenolic acids	酚酸类	Phenolic acids	酚酸类	C17H16O6	3	0.5347	83013-81-4	622.53	305.69	441.04	15168.3	12357.5	2000.22	1.29841	0.14369	0.300696	0.0463747	-4.43052	down	-	-
MEDL00349	Ser-Leu	丝氨酸-亮氨酸	Amino acids and derivatives	氨基酸及其衍生物	Amino acids and derivatives	氨基酸及其衍生物	C9H18N2O4	3	0.5298	6665-16-3	2583.56	2352.67	1455	3644.61	7405.08	5527.14	1.25475	0.0773954	0.215426	0.385552	-1.375	down	-	-
MW0151985	Kaempferol 3-O-beta-D-glucosylgalactoside	山奈酚3-O-BETA-D-葡萄糖基半乳糖苷	Flavonoids	黄酮	Flavonols	黄酮醇	C27H30O16	3	0.5257	31512-06-8	16120.5	17175.4	22067.3	13698.3	9068.89	4045.86	1.08127	0.0549308	0.18321	2.06478	1.04599	up	-	-
MW0116440	1-(4-Hydroxyphenyl)-5-mercaptotetrazole	1-(4-羟基苯基)-5-巯基四唑	Others	其它类	Ketone compounds	酮类化合物	C7H6N4OS	3	0.5255	52431-78-4	13455.2	17426.1	21199.3	5120.29	11708.3	5107.92	1.20694	0.0327642	0.148547	2.37415	1.24741	up	-	-
MW0015126	7,8-Dehydro-beta-micropteroxanthin	7,8-脱氢-β-微蝶黄素	Alcohol and amines	醇、胺类	Alcohols	醇类	C27H38O2	3	0.5237	148031-76-9	3245.16	6335.65	5388.98	3760.46	1753.07	1970.37	1.09094	0.0966797	0.244066	2.00027	1.00019	up	-	-
MW0109731	S-Methyl methanesulfinothioate	S-甲基亚硫代硫代酸甲酯	Others	其它类	Lactones	内酯类化合物	C2H6OS2	3	0.5178	13882-12-7	2434.04	844.64	1702.35	523.23	352.64	835.32	1.1462	0.131164	0.285969	2.91086	1.54144	up	-	-
MW0156520	2-[(1R,5R)-5-[2,4-dihydroxy-3-(3-methylbut-2-enyl)benzoyl]-5-(2,4-dihydroxyphenyl)-3-methylcyclohex-2-en-1-yl]-1,3,5a,8-tetrahydroxy-10a-(3-methylbut-2-enyl)-[1]benzofuro[3,2-b]chromen-11-one	桑根农E	Heterocyclic compounds	杂环化合物	Heterocyclic compounds	杂环化合物	C45H44O12	3	0.5173	81381-69-3	9954.47	3718.65	12796.9	19662.2	21093.9	18093.1	1.1074	0.0455773	0.169864	0.449794	-1.15266	down	C17871	-
MW0122558	8-Benzyl-1,3,8-triazaspiro[4.5]decane-2,4-dione	8-Benzyl-1,3,8-triazaspiro[4.5]decane-2,4-dione	Benzene and substituted derivatives	苯及其衍生物	Benzene and substituted derivatives	苯及其衍生物	C14H17N3O2	3	0.5151	28936-94-9	9007.6	7508.69	5735.27	2492.87	1327.91	2624.5	1.33577	0.018161	0.119189	3.45238	1.78759	up	-	-
MW0000810	1,1'-Bi-2-naphthol	（S)-(-)-1,1'-Bi-2-萘酚	Benzene and substituted derivatives	苯及其衍生物	Benzene and substituted derivatives	苯及其衍生物	C20H14O2	3	0.5146	18531-94-7 | 602-09-5 | 18531-99-2	11817.8	16044.3	7304.5	28769.2	37268.9	31028.1	1.31775	0.00450535	0.0743943	0.362295	-1.46476	down	-	-
MW0001800	2-(2-Naphthyl)indole	2-(2-萘基)吲哚	Benzene and substituted derivatives	苯及其衍生物	Benzene and substituted derivatives	苯及其衍生物	C18H13N	3	0.511	23746-81-8	12043	7223.34	12924.2	7124.17	3208.68	3885.51	1.17777	0.0566542	0.184305	2.26401	1.17888	up	-	-
MW0150669	Guinea green B	几内亚绿B	Heterocyclic compounds	杂环化合物	Heterocyclic compounds	杂环化合物	C37H35N2NaO6S2	3	0.5027	4680-78-8	2849.53	8499.9	3743.99	1123.85	1033.03	315.62	1.25198	0.135746	0.29097	6.10452	2.60988	up	-	-
MW0157635	Thr-Glu-Lys-Asp-Glu	Thr-Glu-Lys-Asp-Glu	Amino acids and derivatives	氨基酸及其衍生物	Amino acids and derivatives	氨基酸及其衍生物	C24H40N6O13	2	0.9175	-	343151	313429	277265	883899	1.46414e+06	1.69555e+06	1.38788	0.0493847	0.17518	0.230945	-2.11438	down	-	-
MW0153076	Lys-Met-His	L-赖氨酸-L-蛋氨酸-L-组氨酸	Amino acids and derivatives	氨基酸及其衍生物	Amino acids and derivatives	氨基酸及其衍生物	C17H30N6O4S1	2	0.9123	-	229188	242295	178314	90677.8	110338	70335.3	1.35252	0.00924793	0.0918335	2.39467	1.25983	up	-	-
MW0144564	Ala-Glu-Ile-Lys	Ala-Glu-Ile-Lys	Amino acids and derivatives	氨基酸及其衍生物	Amino acids and derivatives	氨基酸及其衍生物	C20H37N5O7	2	0.9065	-	7460.45	15935.9	13792.2	137176	94467.1	135540	1.40589	0.0135088	0.106419	0.101281	-3.30357	down	-	-
MW0152916	Lys-Asp-Tyr-Glu-Leu	Lys-Asp-Tyr-Glu-Leu	Amino acids and derivatives	氨基酸及其衍生物	Amino acids and derivatives	氨基酸及其衍生物	C30H46N6O11	2	0.9012	-	29582.2	29877	16140.8	5909.62	8854.26	6030.75	1.34335	0.0508817	0.176982	3.63556	1.86218	up	-	-
MW0011898	1,2-Dioctanoyl-sn-glycerol	1,2-Dioctanoyl-sn-glycerol	GL	甘油脂类	DG	甘油二酯	C19H36O5	2	0.8987	-	11036.2	12173.3	7162.13	32217	34268.9	65205.9	1.34888	0.0841709	0.226145	0.230627	-2.11637	down	-	-
MW0145746	Asn-Glu-Thr-Asp-Leu	Asn-Glu-Thr-Asp-Leu	Amino acids and derivatives	氨基酸及其衍生物	Amino acids and derivatives	氨基酸及其衍生物	C23H38N6O12	2	0.8986	-	30228.7	22814.8	15520.4	46440.2	80275.1	62438	1.30222	0.0383467	0.157352	0.362478	-1.46403	down	-	-
MW0150309	Gly-Arg-Tyr	甘氨酸-精氨酸-酪氨酸	Amino acids and derivatives	氨基酸及其衍生物	Amino acids and derivatives	氨基酸及其衍生物	C17H26N6O5	2	0.8791	-	33440.9	12269	12506.8	6405.39	8742.57	6328.51	1.1329	0.221932	0.382573	2.71072	1.43868	up	-	-
MW0153653	Met-Pro-Thr-Phe-Gln	Met-Pro-Thr-Phe-Gln	Amino acids and derivatives	氨基酸及其衍生物	Amino acids and derivatives	氨基酸及其衍生物	C28H42N6O8S	2	0.8733	-	24321.3	30166.5	16991.2	64911.2	81049.1	95401.8	1.37501	0.0126735	0.104116	0.296149	-1.75561	down	-	-
MW0159213	Val-Tyr-Gln-Lys	Val-Tyr-Gln-Lys	Amino acids and derivatives	氨基酸及其衍生物	Amino acids and derivatives	氨基酸及其衍生物	C25H40N6O7	2	0.8723	-	192.26	2040.6	2089.58	22251.2	24533	10979.8	1.25474	0.0483369	0.173678	0.0748293	-3.74025	down	-	-
MW0154729	Oleoyl Ethanolamide-d4	油酰乙醇酰胺-D4	Lipids	脂质	Free fatty acids	游离脂肪酸	C20H35D4NO2	2	0.8657	-	1.13832e+06	2.95681e+06	2.24325e+06	543877	690995	615431	1.29037	0.104661	0.255326	3.42559	1.77635	up	-	-
MW0061712	PI(18:0/20:4(5Z,8Z,11Z,14Z))	PI(18:0/20:4(8Z,11Z,14Z,17Z))	GP	甘油磷脂类	PI	磷脂酰肌醇	C47H83O13P	2	0.8591	-	134490	124095	96383.4	252713	280642	263126	1.40061	0.0007599	0.0506524	0.445672	-1.16595	down	-	-
MW0054380	Ethyl alpha-linolenate	亚麻酸乙酯	Lipids	脂质	Free fatty acids	游离脂肪酸	C20H34O2	2	0.8528	-	14186	17483.6	18527.2	89521.4	83224.7	70300	1.42799	0.00557226	0.0790937	0.206532	-2.27556	down	-	-
MW0154273	Nap-His-OH	Nap-His-OH	Amino acids and derivatives	氨基酸及其衍生物	Amino acids and derivatives	氨基酸及其衍生物	C24H20N4O6	2	0.8401	-	225747	161199	200755	73129.2	58432.4	46968.7	1.39373	0.00997896	0.094882	3.29189	1.71891	up	-	-
MW0150001	Glu-Glu-Thr-Val-Tyr	谷氨酸-谷氨酸-苏氨酸-缬氨酸-酪氨酸	Amino acids and derivatives	氨基酸及其衍生物	Amino acids and derivatives	氨基酸及其衍生物	C28H41N5O12	2	0.8348	-	42122.5	33995.5	35401	88497.6	105160	60686.9	1.32278	0.0620548	0.192341	0.438456	-1.1895	down	-	-
MW0158449	Tyr-Glu-Arg-Arg	酪氨酸-谷氨酸-精氨酸-精氨酸	Amino acids and derivatives	氨基酸及其衍生物	Amino acids and derivatives	氨基酸及其衍生物	C26H42N10O8	2	0.8333	-	13.24	24.19	19.24	43.53	182.51	110.32	1.26435	0.144984	0.301806	0.16848	-2.56935	down	-	-
MW0155193	Phe-Glu-Val-Glu	苯丙氨酰-谷氨酰-缬氨酸-谷氨酸	Amino acids and derivatives	氨基酸及其衍生物	Amino acids and derivatives	氨基酸及其衍生物	C24H34N4O9	2	0.8333	-	122651	97762.8	95579.1	276631	361971	303572	1.41462	0.00838873	0.0877044	0.335387	-1.5761	down	-	-
MW0145547	Arg-Tyr-Met	L-精氨酰-L-酪氨酰-L-蛋氨酸	Amino acids and derivatives	氨基酸及其衍生物	Amino acids and derivatives	氨基酸及其衍生物	C20H32N6O5S1	2	0.8155	-	3879.17	3384.66	6052.44	20566.5	22452	23799	1.4063	0.000154482	0.0343101	0.199293	-2.32704	down	-	-
MW0159223	Val-Tyr-Lys-Val-Leu	Val-Tyr-Lys-Val-Leu	Amino acids and derivatives	氨基酸及其衍生物	Amino acids and derivatives	氨基酸及其衍生物	C31H52N6O7	2	0.7954	-	5747.81	5399.48	10709.7	19499.9	18309.6	24436.5	1.31918	0.00623533	0.0818674	0.351139	-1.50988	down	-	-
MW0145765	Asn-His-Asp	Asn-His-Asp	Amino acids and derivatives	氨基酸及其衍生物	Amino acids and derivatives	氨基酸及其衍生物	C14H20N6O7	2	0.791	-	122747	96679.8	115020	56395.9	46893	57579.4	1.39539	0.00844973	0.0877108	2.079	1.05589	up	-	-
MW0110992	Dicyclohexylamine	二环己胺	Alcohol and amines	醇、胺类	Amines	胺类	C12H23N	2	0.7907	-	110.29	143.29	96.18	44.26	17.43	27.93	1.3324	0.0109327	0.0986919	3.9027	1.96447	up	C14686	-
MW0156839	Ser-Lys-Gln	L-丝氨酰-L-赖氨酰-L-谷氨酰胺	Amino acids and derivatives	氨基酸及其衍生物	Amino acids and derivatives	氨基酸及其衍生物	C14H27N5O6	2	0.7876	-	7012.99	7128.47	4783.68	45721.9	31853.4	46247.2	1.41887	0.015742	0.111872	0.152841	-2.7099	down	-	-
MW0157899	Thr-Nap-OH	Thr-Nap-OH	Amino acids and derivatives	氨基酸及其衍生物	Amino acids and derivatives	氨基酸及其衍生物	C23H22N2O7	2	0.779	-	36492.2	30461.2	22590.6	79162.9	64811	72212.4	1.37043	0.00187101	0.0629092	0.414198	-1.27161	down	-	-
MW0159193	Val-Thr-Tyr-Lys	Val-Thr-Tyr-Lys	Amino acids and derivatives	氨基酸及其衍生物	Amino acids and derivatives	氨基酸及其衍生物	C24H39N5O7	2	0.777	-	5892.87	7342.5	5511.14	16261.2	18882.7	18242.7	1.42	0.000502706	0.0506524	0.351146	-1.50986	down	-	-
MW0146298	Asp-Tyr-Asp-Asn-Phe	Asp-Tyr-Asp-Asn-Phe	Amino acids and derivatives	氨基酸及其衍生物	Amino acids and derivatives	氨基酸及其衍生物	C30H36N6O12	2	0.77	-	43512.2	36043.3	32573.6	14197	16240.4	10513.9	1.37901	0.00727692	0.0832757	2.73811	1.45318	up	-	-
MW0158927	Val-Asn-Tyr-Asp	Val-Asn-Tyr-Asp	Amino acids and derivatives	氨基酸及其衍生物	Amino acids and derivatives	氨基酸及其衍生物	C22H31N5O9	2	0.7691	-	130.75	1595.1	205.01	4041.22	8125.31	7510.6	1.26377	0.0309447	0.145918	0.0981271	-3.3492	down	-	-
MW0148075	Cys-Trp-His	半胱氨酸-色氨酸-组氨酸	Amino acids and derivatives	氨基酸及其衍生物	Amino acids and derivatives	氨基酸及其衍生物	C20H24N6O4S1	2	0.7684	-	5543.94	6720.44	6053.24	11881.9	13387.5	17365.3	1.38256	0.033796	0.15015	0.429641	-1.2188	down	-	-
MW0130883	2-Methyl-5,7,8-trimethoxyisoflavone	2-甲基-5,7,8-三甲氧基异黄酮	Flavonoids	黄酮	Flavones	黄酮	C19H18O5	2	0.7635	-	50759.3	56898.9	58783.1	19514.8	18946.3	34912.6	1.30328	0.0146947	0.109687	2.26841	1.18168	up	-	-
MW0015472	9-Nitrooleic acid	9?- 硝基油酸	Lipids	脂质	Free fatty acids	游离脂肪酸	C18H33NO4	2	0.7624	-	50270.9	97928	90515.5	6826.87	6528.55	6424.56	1.42266	0.0387735	0.157677	12.0685	3.59317	up	-	-
MW0158526	Tyr-Leu-Pro-Ala-Val	Tyr-Leu-Pro-Ala-Val	Amino acids and derivatives	氨基酸及其衍生物	Amino acids and derivatives	氨基酸及其衍生物	C28H43N5O7	2	0.7616	-	1037.98	188.04	909.33	28807.2	37241.4	50339.1	1.39085	0.0258274	0.136464	0.0183469	-5.76832	down	-	-
MW0155304	Phe-Phe-Met	苯丙氨酰-苯丙氨酰-蛋氨酸	Amino acids and derivatives	氨基酸及其衍生物	Amino acids and derivatives	氨基酸及其衍生物	C23H29N3O4S1	2	0.7603	-	9978.56	6114.62	12886.2	6574.24	3017.19	1983.04	1.11582	0.080328	0.220759	2.50373	1.32408	up	-	-
MW0138677	kaempferol 3-O-beta-D-glucopyranosyl-7-O-alpha-L-rhamnopyranoside	山奈酚3-O-BETA-D-吡喃葡萄糖基-7-O-ALPHA-L-吡喃鼠李糖苷	Flavonoids	黄酮	Flavonols	黄酮醇	C27H30O15	2	0.7599	-	424.03	215.65	415.79	3341.67	4694.2	1443.7	1.34262	0.0958872	0.243307	0.111342	-3.16694	down	-	-
MW0111242	N-(2-Hydroxyethyl)hexadec-9-enamide	N-(2-羟乙基)hexadec-9-enamide	Alcohol and amines	醇、胺类	Amines	胺类	C18H35NO2	2	0.7598	-	4682.84	4067.04	1964.11	96244.5	106384	90615.1	1.42615	0.00183434	0.0629092	0.0365361	-4.77453	down	-	-
MW0110054	Trp-Asn-Arg	色氨酸-天冬酰胺-精氨酸	Amino acids and derivatives	氨基酸及其衍生物	Amino acids and derivatives	氨基酸及其衍生物	C21H30N8O5	2	0.7595	-	56397.7	53272.6	77149	7760.53	24168.6	19824.1	1.27239	0.0107629	0.0983066	3.60981	1.85192	up	-	-
MW0152333	Leu-Glu-Val-Val-Lys	Leu-Glu-Val-Val-Lys	Amino acids and derivatives	氨基酸及其衍生物	Amino acids and derivatives	氨基酸及其衍生物	C27H50N6O8	2	0.759	-	2405.02	82.22	297.87	9741.37	32719.7	27348.7	1.27563	0.0828148	0.224581	0.0398957	-4.64762	down	-	-
MW0158415	Tyr-Asp-Leu-Glu	酪氨酸-天冬氨酸-亮氨酸-谷氨酸	Amino acids and derivatives	氨基酸及其衍生物	Amino acids and derivatives	氨基酸及其衍生物	C24H34N4O10	2	0.759	-	224335	164440	148451	72814.6	84915	76939.4	1.36911	0.0457573	0.169914	2.28929	1.1949	up	-	-
MW0157765	Thr-Phe-Leu-Thr-Gln	Thr-Phe-Leu-Thr-Gln	Amino acids and derivatives	氨基酸及其衍生物	Amino acids and derivatives	氨基酸及其衍生物	C28H44N6O9	2	0.7588	-	43996.3	47554	34162.5	17722.4	24581.4	10241.4	1.23858	0.0133618	0.106297	2.39247	1.2585	up	-	-
MW0158995	Val-Glu-Phe-Asp	Val-Glu-Phe-Asp	Amino acids and derivatives	氨基酸及其衍生物	Amino acids and derivatives	氨基酸及其衍生物	C23H32N4O9	2	0.7587	-	19504.2	25918.8	28381.4	51803.7	76040.6	78104.9	1.36404	0.0261866	0.136985	0.358362	-1.48051	down	-	-
MW0146043	Asp-Asn-Phe-Lys-Ala	Asp-Asn-Phe-Lys-Ala	Amino acids and derivatives	氨基酸及其衍生物	Amino acids and derivatives	氨基酸及其衍生物	C26H39N7O9	2	0.7586	-	1.83694e+06	1.95197e+06	1.34151e+06	3.55631e+06	5.28225e+06	4.65502e+06	1.36923	0.0207847	0.125858	0.380212	-1.39512	down	-	-
MW0151084	His-Ser-Lys-Lys	His-Ser-Lys-Lys	Amino acids and derivatives	氨基酸及其衍生物	Amino acids and derivatives	氨基酸及其衍生物	C21H38N8O6	2	0.7582	-	949.35	2466.58	1900.66	2716.52	15751.6	12856.1	1.13954	0.157939	0.318072	0.169728	-2.5587	down	-	-
MW0158169	Trp-His-Tyr	色氨酸-组氨酸-酪氨酸	Amino acids and derivatives	氨基酸及其衍生物	Amino acids and derivatives	氨基酸及其衍生物	C26H28N6O5	2	0.758	-	42212.6	35727.6	45882.9	23832.9	18917.8	17583.5	1.37445	0.00639728	0.0818674	2.05229	1.03723	up	-	-
MW0155357	Phe-Thr-Pro-Thr-Glu	Phe-Thr-Pro-Thr-Glu	Amino acids and derivatives	氨基酸及其衍生物	Amino acids and derivatives	氨基酸及其衍生物	C27H39N5O10	2	0.7578	-	279614	164432	228557	959523	1.42481e+06	935324	1.39686	0.0268736	0.137857	0.202612	-2.30321	down	-	-
MW0152913	Lys-Asp-Trp	L-赖氨酸-L-天冬氨酸-L-色氨酸	Amino acids and derivatives	氨基酸及其衍生物	Amino acids and derivatives	氨基酸及其衍生物	C21H29N5O6	2	0.7575	-	2.16207e+06	2.76548e+06	2.69507e+06	762520	804346	868266	1.42671	0.010409	0.0967889	3.13027	1.64629	up	-	-
MW0151653	Ile-Val-Lys-Trp-Asp	Ile-Val-Lys-Trp-Asp	Amino acids and derivatives	氨基酸及其衍生物	Amino acids and derivatives	氨基酸及其衍生物	C32H49N7O8	2	0.7574	-	9054.52	7221.19	8698.31	41040.9	45801.1	29773.9	1.41611	0.0220994	0.128498	0.214156	-2.22326	down	-	-
MW0152445	Leu-Phe-Asn-Asp	Leu-Phe-Asn-Asp	Amino acids and derivatives	氨基酸及其衍生物	Amino acids and derivatives	氨基酸及其衍生物	C23H33N5O8	2	0.7572	-	669142	576941	487938	230576	236217	175576	1.39241	0.0120095	0.102745	2.69941	1.43265	up	-	-
MW0144755	Ala-Thr-Tyr-Lys	Ala-Thr-Tyr-Lys	Amino acids and derivatives	氨基酸及其衍生物	Amino acids and derivatives	氨基酸及其衍生物	C22H35N5O7	2	0.757	-	524893	509747	578118	217436	149882	180316	1.41343	0.000243233	0.040063	2.94496	1.55825	up	-	-
MW0159218	Val-Tyr-His-Lys	Val-Tyr-His-Lys	Amino acids and derivatives	氨基酸及其衍生物	Amino acids and derivatives	氨基酸及其衍生物	C26H39N7O6	2	0.757	-	26.35	32	39.03	74.66	68.55	137.56	1.29678	0.105488	0.256668	0.346832	-1.52769	down	-	-
MW0108141	Met-Ala-Lys	L-蛋氨酸-L-丙氨酸-L-赖氨酸	Amino acids and derivatives	氨基酸及其衍生物	Amino acids and derivatives	氨基酸及其衍生物	C14H28N4O4S1	2	0.7565	-	4407.4	5023.48	2130.25	7483.14	10764.9	16514.3	1.2262	0.0871919	0.230919	0.332577	-1.58824	down	-	-
MW0155249	Phe-Leu-Glu-Lys-Asp	Phe-Leu-Glu-Lys-Asp	Amino acids and derivatives	氨基酸及其衍生物	Amino acids and derivatives	氨基酸及其衍生物	C30H46N6O10	2	0.7565	-	60489.7	44467.8	40593	9933.79	5669	4636.89	1.39689	0.0155467	0.11117	7.19135	2.84626	up	-	-
MW0155828	Pro-Gln-Asp	脯氨酰-谷氨酰胺-天冬氨酸	Amino acids and derivatives	氨基酸及其衍生物	Amino acids and derivatives	氨基酸及其衍生物	C14H22N4O7	2	0.756	-	1762.27	4086.75	2357.04	295.83	407.87	685.49	1.34204	0.0788626	0.218331	5.90708	2.56245	up	-	-
MW0155263	Phe-Leu-Val-Met-Met	Phe-Leu-Val-Met-Met	Amino acids and derivatives	氨基酸及其衍生物	Amino acids and derivatives	氨基酸及其衍生物	C30H49N5O6S2	2	0.7551	-	83793.9	79670.9	137190	282662	225184	244010	1.33726	0.00399692	0.0722456	0.399884	-1.32235	down	-	-
MW0011860	1,2-Dimyristoleoyl-sn-glycero-3-phosphocholine	1,2-二-(9Z-十四碳烯基)-sn-甘油-3-磷酸胆碱	GP	甘油磷脂类	PC	磷脂酰胆碱	C36H68NO8P	2	0.7547	-	20710.1	15649.7	18992.5	4861.57	2779.18	3412.33	1.4083	0.00430612	0.073561	5.00786	2.3242	up	-	-
MW0147962	Cymathere lactone	Cymathere lactone	Amino acids and derivatives	氨基酸及其衍生物	Amino acids and derivatives	氨基酸及其衍生物	C18H26O3	2	0.7534	-	2263.3	3864.83	5932.78	19123.2	24201.1	50367.6	1.33871	0.104971	0.255854	0.128729	-2.95759	down	-	-
MW0155309	Phe-Phe-Val	苯丙氨酰-苯丙氨酰-缬氨酸	Amino acids and derivatives	氨基酸及其衍生物	Amino acids and derivatives	氨基酸及其衍生物	C23H29N3O4	2	0.7532	-	52219	71197.9	48019.9	25402.1	26567.5	20634.2	1.36533	0.0369265	0.155621	2.36126	1.23956	up	-	-
MW0153723	Met-Val-Trp	甲硫氨酰-缬氨酰-色氨酸	Amino acids and derivatives	氨基酸及其衍生物	Amino acids and derivatives	氨基酸及其衍生物	C21H30N4O4S1	2	0.7531	-	4542.96	4483.51	4307.85	1542.75	1306.36	3092.74	1.23588	0.0460278	0.170446	2.24414	1.16616	up	-	-
MW0145296	Arg-Asp-Ile	L-精氨酰-L-天冬氨酰-L-异亮氨酸	Amino acids and derivatives	氨基酸及其衍生物	Amino acids and derivatives	氨基酸及其衍生物	C16H30N6O6	2	0.7529	-	102746	99374.2	68316.5	26118.6	31568.5	10280.1	1.2865	0.0108234	0.0983836	3.97893	1.99238	up	-	-
MW0048990	[(2R,3R,4S,5R,6S,8S,13S,16S,17R)-11-ethyl-8,16-dihydroxy-6-methoxy-13-(methoxymethyl)-11-azahexacyclo[7.7.2.12,5.01,10.03,8.013,17]nonadecan-4-yl] acetate	[(2R,3R,4S,5R,6S,8S,13S,16S,17R)-11-乙基-8,16-二羟基-6-甲氧基-13-(甲氧基甲基)-11-氮杂六环[7.7.2.12,5.01 ,10.03,8.013,17]nonadecan-4-yl] 乙酸酯	Others	其它类	Lactones	内酯类化合物	C25H39NO6	2	0.7526	-	3425.42	2128.69	2301.25	5592.84	5527.29	5791.19	1.35265	0.0149367	0.110653	0.464503	-1.10624	down	-	-
MW0053732	2,3-Dihydroxypropyl 2-[(octadec-9-enoyl)amino]ethyl hydrogen phosphate	2,3-Dihydroxypropyl 2-[(octadec-9-enoyl)amino]ethyl hydrogen phosphate	Lipids	脂质	Free fatty acids	游离脂肪酸	C23H46NO7P	2	0.7523	-	43841.9	50771.7	28580	13598.4	18423.7	9267.04	1.29851	0.0385498	0.157572	2.98368	1.5771	up	-	-
MW0157788	Thr-Pro-Ser-Cys-Asn	Thr-Pro-Ser-Cys-Asn	Amino acids and derivatives	氨基酸及其衍生物	Amino acids and derivatives	氨基酸及其衍生物	C19H32N6O9S	2	0.7516	-	101529	65500.4	148879	344948	289552	375292	1.32988	0.00268247	0.0669726	0.312844	-1.67648	down	-	-
MW0153121	Lys-Pro-Tyr	L-赖氨酸-L-脯氨酸-L-酪氨酸	Amino acids and derivatives	氨基酸及其衍生物	Amino acids and derivatives	氨基酸及其衍生物	C20H30N4O5	2	0.7516	-	81288.7	102961	102306	297774	240369	287642	1.41522	0.00424178	0.0731668	0.34701	-1.52695	down	-	-
MW0158533	Tyr-Lys-Arg-Glu	酪氨酸-赖氨酸-精氨酸-谷氨酸	Amino acids and derivatives	氨基酸及其衍生物	Amino acids and derivatives	氨基酸及其衍生物	C26H42N8O8	2	0.7513	-	2469.04	5507.6	2509.6	11533.6	21161.2	30743.1	1.32618	0.0816898	0.222808	0.165299	-2.59685	down	-	-
MW0157623	Thr-Glu-Asn-Glu-Val	Thr-Glu-Asn-Glu-Val	Amino acids and derivatives	氨基酸及其衍生物	Amino acids and derivatives	氨基酸及其衍生物	C23H38N6O12	2	0.7505	-	8877.38	22162.7	14517	65257.6	77842	113684	1.36108	0.0328496	0.148559	0.177414	-2.49481	down	-	-
MW0146227	Asp-Phe-Ser-Arg	Asp-Phe-Ser-Arg	Amino acids and derivatives	氨基酸及其衍生物	Amino acids and derivatives	氨基酸及其衍生物	C22H33N7O8	2	0.7504	-	63423.5	29666.4	48737.5	19218	19747.8	21995.4	1.2555	0.109048	0.261105	2.32652	1.21817	up	-	-
MW0137931	Deoxysappanone B trimethyl ether	Deoxysappanone B trimethyl ether	Others	其它类	Ketone compounds	酮类化合物	C19H20O5	2	0.7498	-	17168.4	50377.8	18331.6	60210.3	37517.5	87809.2	1.01692	0.147045	0.304321	0.462861	-1.11135	down	-	-
MW0149388	Gal1-4[Fuc1-3]GlcNAcSp	Gal1-4[Fuc1-3]GlcNAcSp	Others	其它类	Saccharides	糖类	C22H38N4O15	2	0.7497	-	47286.9	41654.2	30874.5	86136	92383.9	86487.3	1.37896	0.00409627	0.0725447	0.452122	-1.14522	down	-	-
MW0151332	Ile-Arg-Leu-Lys	Ile-Arg-Leu-Lys	Amino acids and derivatives	氨基酸及其衍生物	Amino acids and derivatives	氨基酸及其衍生物	C24H48N8O5	2	0.7497	-	43608.2	46811	34153.1	3226.69	10602	6409.16	1.34966	0.00343885	0.0690747	6.15542	2.62186	up	-	-
MW0151425	Ile-Glu-Tyr-Cys-Lys	Ile-Glu-Tyr-Cys-Lys	Amino acids and derivatives	氨基酸及其衍生物	Amino acids and derivatives	氨基酸及其衍生物	C29H46N6O9S	2	0.7491	-	429.28	668.7	1650.37	1296.72	10964.2	7594.49	1.09649	0.179821	0.339589	0.138418	-2.8529	down	-	-
MW0159000	Val-Glu-Thr-Glu	Val-Glu-Thr-Glu	Amino acids and derivatives	氨基酸及其衍生物	Amino acids and derivatives	氨基酸及其衍生物	C19H32N4O10	2	0.7489	-	649502	367095	425619	145184	165019	105776	1.36009	0.0527948	0.180521	3.46704	1.7937	up	-	-
MW0149998	Glu-Glu-Phe-Leu-Val	谷氨酸-谷氨酸-苯丙氨酸-亮氨酸-缬氨酸	Amino acids and derivatives	氨基酸及其衍生物	Amino acids and derivatives	氨基酸及其衍生物	C30H45N5O10	2	0.7489	-	41647.6	71953.5	28104	19221.5	20161.3	18458.3	1.19452	0.163589	0.322009	2.4499	1.29273	up	-	-
MW0155826	Pro-Gln-Ala	脯氨酰-谷氨酰胺-丙氨酸	Amino acids and derivatives	氨基酸及其衍生物	Amino acids and derivatives	氨基酸及其衍生物	C13H22N4O5	2	0.7486	-	114721	69081.6	70126.4	46977.5	45898.4	11814.6	1.04777	0.0625777	0.193316	2.42552	1.27829	up	-	-
MW0146229	Asp-Phe-Trp	L-天冬氨酰-L-苯丙氨酰-L-色氨酸	Amino acids and derivatives	氨基酸及其衍生物	Amino acids and derivatives	氨基酸及其衍生物	C24H26N4O6	2	0.7483	-	48079.9	62238.7	75085.7	138787	125610	160618	1.35784	0.00424026	0.0731668	0.43623	-1.19684	down	-	-
MW0156326	R-4-benzyl-3-isobutyryloxazolidin-2-one	R-4-苄基-3-异丁酰恶唑烷-2-	Benzene and substituted derivatives	苯及其衍生物	Benzene and substituted derivatives	苯及其衍生物	C14H17NO3	2	0.7479	-	34214.3	12831.9	11340.6	6870.28	10672.5	5423.2	1.03876	0.24834	0.406312	2.54232	1.34614	up	-	-
MW0159154	Val-Ser-Glu-Ala-Gly	Val-Ser-Glu-Ala-Gly	Amino acids and derivatives	氨基酸及其衍生物	Amino acids and derivatives	氨基酸及其衍生物	C18H31N5O9	2	0.7473	-	284329	124550	142859	86194.6	76966.6	61008.3	1.20558	0.160488	0.320196	2.46126	1.2994	up	-	-
MW0146218	Asp-Phe-Gln-Lys-Lys	Asp-Phe-Gln-Lys-Lys	Amino acids and derivatives	氨基酸及其衍生物	Amino acids and derivatives	氨基酸及其衍生物	C30H48N8O9	2	0.7471	-	1881.89	2158.6	2301.31	8423.4	4910.73	9491.23	1.36497	0.0568915	0.184728	0.27784	-1.84767	down	-	-
MW0158244	Trp-Ser-Phe-Tyr-Leu	Trp-Ser-Phe-Tyr-Leu	Amino acids and derivatives	氨基酸及其衍生物	Amino acids and derivatives	氨基酸及其衍生物	C38H46N6O8	2	0.7471	-	836.03	8489.69	695.74	22095.8	30718.1	29584.1	1.2484	0.00298164	0.0680309	0.121623	-3.03952	down	-	-
MW0158427	Tyr-Cys-Trp	酪氨酸-半胱氨酸-色氨酸	Amino acids and derivatives	氨基酸及其衍生物	Amino acids and derivatives	氨基酸及其衍生物	C23H26N4O5S1	2	0.7463	-	17570.3	12619.1	14814.8	7204.88	7642.52	1173.9	1.04675	0.023527	0.13157	2.80902	1.49007	up	-	-
MW0107740	Leu-Leu-Ser	L-亮氨酸-L-亮氨酸-L-丝氨酸	Amino acids and derivatives	氨基酸及其衍生物	Amino acids and derivatives	氨基酸及其衍生物	C15H29N3O5	2	0.7462	-	9194.3	8344.4	10960.8	18919.1	28575.6	22633.6	1.37164	0.0313454	0.146498	0.406391	-1.29906	down	-	-
MW0110081	Trp-Ser-Lys	色氨酸-丝氨酸-赖氨酸	Amino acids and derivatives	氨基酸及其衍生物	Amino acids and derivatives	氨基酸及其衍生物	C20H29N5O5	2	0.7456	-	80314	133956	106399	48726.1	29704	56865.8	1.25955	0.0382156	0.157352	2.37013	1.24496	up	-	-
MW0159020	Val-His-Glu-Lys-Ala	Val-His-Glu-Lys-Ala	Amino acids and derivatives	氨基酸及其衍生物	Amino acids and derivatives	氨基酸及其衍生物	C25H42N8O8	2	0.7455	-	11901.6	5189.04	2415.22	57003.7	64728.9	26897.6	1.29728	0.057739	0.185714	0.131237	-2.92975	down	-	-
MW0010936	(R)-Campholenic aldehyde	(R)-樟脑醛	Others	其它类	Aldehyde compounds	醛类化合物	C10H16O	2	0.7449	-	635.91	823.63	1690.07	497.09	385.97	606.95	1.05544	0.227533	0.387291	2.11382	1.07985	up	-	-
MW0150014	Glu-Gly-Lys-Tyr-Glu	谷氨酸-甘氨酸-赖氨酸-酪氨酸-谷氨酸	Amino acids and derivatives	氨基酸及其衍生物	Amino acids and derivatives	氨基酸及其衍生物	C27H40N6O11	2	0.7448	-	281437	104758	229462	431498	632163	709959	1.23466	0.0235067	0.13157	0.347119	-1.5265	down	-	-
MW0120565	4-Hydroxy Triamterene	对羟基三苯甲基	Benzene and substituted derivatives	苯及其衍生物	Benzene and substituted derivatives	苯及其衍生物	C12H11N7O	2	0.7442	-	47409.4	60540.9	46544	157159	145260	199623	1.4109	0.0145218	0.109385	0.307732	-1.70026	down	-	-
MW0155464	Phe-Nap-OH	Phe-Nap-OH	Amino acids and derivatives	氨基酸及其衍生物	Amino acids and derivatives	氨基酸及其衍生物	C27H22N2O6	2	0.7438	-	39753.7	43354.3	27543.1	5206.68	6079.61	18949.7	1.23882	0.0149525	0.110653	3.65958	1.87168	up	-	-
MW0144519	Ala-Asp-Ser-Glu	Ala-Asp-Ser-Glu	Amino acids and derivatives	氨基酸及其衍生物	Amino acids and derivatives	氨基酸及其衍生物	C15H24N4O10	2	0.7411	-	7317.54	4240.13	5494.93	1319.87	1739.17	688.3	1.33675	0.0279943	0.140311	4.55059	2.18605	up	-	-
MW0150131	Glu-Pro-Trp	谷氨酸-脯氨酸-色氨酸	Amino acids and derivatives	氨基酸及其衍生物	Amino acids and derivatives	氨基酸及其衍生物	C21H26N4O6	2	0.741	-	102779	130748	138917	38798.1	44225.2	42778.6	1.41973	0.0156272	0.111554	2.96056	1.56587	up	-	-
MW0145846	Asn-Met-Ser	L-天冬酰胺-L-甲硫氨酰-L-丝氨酸	Amino acids and derivatives	氨基酸及其衍生物	Amino acids and derivatives	氨基酸及其衍生物	C12H22N4O6S1	2	0.7402	-	33485.2	33632.9	28402.6	48577	73087.7	127707	1.21446	0.158925	0.318564	0.383046	-1.38441	down	-	-
MW0150428	Gly-Lys-Thr-Ser-Glu	甘氨酸-赖氨酸-苏氨酸-丝氨酸-谷氨酸	Amino acids and derivatives	氨基酸及其衍生物	Amino acids and derivatives	氨基酸及其衍生物	C20H36N6O10	2	0.7398	-	65121.5	56699.2	49405.9	19002.3	20921.5	18797.8	1.42194	0.0128788	0.104473	2.9159	1.54394	up	-	-
MW0158358	Tyr-Ala-Leu-Asp	酪氨酸-丙氨酸-亮氨酸-天冬氨酸	Amino acids and derivatives	氨基酸及其衍生物	Amino acids and derivatives	氨基酸及其衍生物	C22H32N4O8	2	0.7394	-	1684.66	11309.6	6140.49	19274.5	10860.3	65869.4	1.03288	0.271411	0.427186	0.199312	-2.3269	down	-	-
MW0145544	Arg-Tyr-Ile-Arg	Arg-Tyr-Ile-Arg	Amino acids and derivatives	氨基酸及其衍生物	Amino acids and derivatives	氨基酸及其衍生物	C27H46N10O6	2	0.7383	-	1162.92	12266	103.13	31964.2	46674.9	48900.6	1.15073	0.00582914	0.0805574	0.1061	-3.2365	down	-	-
MW0158231	Trp-Pro-Met	色氨酸-脯氨酸-甲硫氨酸	Amino acids and derivatives	氨基酸及其衍生物	Amino acids and derivatives	氨基酸及其衍生物	C21H28N4O4S1	2	0.7381	-	19765.5	27514.2	35185.3	5721.04	4107.35	7446.61	1.38154	0.0345089	0.152022	4.77366	2.2551	up	-	-
MW0138447	Irigenin, 7-benzyl ether	IRIGENIN，7-苄基醚	Flavonoids	黄酮	Flavones	黄酮	C25H22O8	2	0.7377	-	15246.8	28294.8	24194	2123.45	3438.89	12249.7	1.18172	0.0306477	0.1458	3.80281	1.92707	up	-	-
MW0158539	Tyr-Lys-Glu-Arg	酪氨酸-赖氨酸-谷氨酸-精氨酸	Amino acids and derivatives	氨基酸及其衍生物	Amino acids and derivatives	氨基酸及其衍生物	C26H42N8O8	2	0.7371	-	4637.21	10967.7	709.25	12780	29069	33220.8	1.08839	0.0695501	0.206139	0.21732	-2.20211	down	-	-
MW0158487	Tyr-His-Phe	酪氨酸-组氨酸-苯丙氨酸	Amino acids and derivatives	氨基酸及其衍生物	Amino acids and derivatives	氨基酸及其衍生物	C24H27N5O5	2	0.7364	-	18204.7	21203	24446.6	74988.3	110936	112840	1.41197	0.0219329	0.128121	0.213728	-2.22615	down	-	-
MW0146149	Asp-Ile-Ile-Tyr-Ala	Asp-Ile-Ile-Tyr-Ala	Amino acids and derivatives	氨基酸及其衍生物	Amino acids and derivatives	氨基酸及其衍生物	C28H43N5O9	2	0.7363	-	12230.7	3974.7	5935.44	1392.41	3115.93	1913.05	1.18936	0.165475	0.323943	3.44798	1.78575	up	-	-
MW0158433	Tyr-Gln-Gln	酪氨酸-谷氨酸-谷氨酰胺	Amino acids and derivatives	氨基酸及其衍生物	Amino acids and derivatives	氨基酸及其衍生物	C19H27N5O7	2	0.7357	-	5139.38	6541.72	7671.82	25044	22799	42308.7	1.38146	0.0600336	0.189361	0.21467	-2.21981	down	-	-
MW0169279	Huperzine-A	石杉碱甲	Heterocyclic compounds	杂环化合物	Heterocyclic compounds	杂环化合物	C15H18N2O	2	0.7349	-	1248.61	568.54	2575.04	11480.7	14338.7	4046.51	1.23473	0.104585	0.255326	0.147064	-2.76549	down	-	-
MW0058017	1-Tetradecanoyl-2-pentadecanoyl-glycero-3-phosphoethanolamine	PE(14:0/15:0)	GP	甘油磷脂类	PE	磷脂酰乙醇胺	C34H68NO8P	2	0.7342	-	7775.19	5615.64	6415.4	2349.34	5170.19	2311.94	1.16104	0.051068	0.176982	2.01457	1.01048	up	-	-
MW0155387	Phe-Tyr-Leu-Leu-Tyr	Phe-Tyr-Leu-Leu-Tyr	Amino acids and derivatives	氨基酸及其衍生物	Amino acids and derivatives	氨基酸及其衍生物	C39H51N5O8	2	0.7337	-	44049.2	23382.3	34858.2	56356.1	79707.6	70619.4	1.24735	0.0189485	0.121774	0.494911	-1.01476	down	-	-
MW0105464	Ala-Gly-Arg	L-丙氨酰-甘氨酰-L-精氨酸	Amino acids and derivatives	氨基酸及其衍生物	Amino acids and derivatives	氨基酸及其衍生物	C11H22N6O4	2	0.7329	-	38824.6	23806.9	23740.9	126228	182899	158226	1.40764	0.01087	0.0985095	0.184812	-2.43587	down	-	-
MW0158406	Tyr-Asp-Ala-Asp	酪氨酸-天冬氨酸-天冬氨酸-天冬氨酸	Amino acids and derivatives	氨基酸及其衍生物	Amino acids and derivatives	氨基酸及其衍生物	C20H26N4O10	2	0.7328	-	42727.3	70721.1	66940.7	168887	163336	197023	1.37651	0.00117498	0.0554745	0.340841	-1.55283	down	-	-
MW0157737	Thr-Lys-Trp	苏氨酸-赖氨酸-色氨酸	Amino acids and derivatives	氨基酸及其衍生物	Amino acids and derivatives	氨基酸及其衍生物	C21H31N5O5	2	0.732	-	11531.5	14628.4	12260.2	25897.8	24708.6	39643.1	1.3412	0.0641309	0.196674	0.425709	-1.23206	down	-	-
MW0157770	Thr-Phe-Thr	苏氨酸-苯丙氨酸-苏氨酸	Amino acids and derivatives	氨基酸及其衍生物	Amino acids and derivatives	氨基酸及其衍生物	C17H25N3O6	2	0.7313	-	9214.17	13240.3	5195.74	36342.6	39067.5	35039.6	1.3542	0.00186233	0.0629092	0.250342	-1.99803	down	-	-
MW0145332	Arg-Gln-Ser-Lys	Arg-Gln-Ser-Lys	Amino acids and derivatives	氨基酸及其衍生物	Amino acids and derivatives	氨基酸及其衍生物	C20H39N9O7	2	0.7301	-	1038.14	2578.96	4829.24	43592.2	62658.5	46644.5	1.37859	0.0125062	0.103984	0.0552427	-4.17807	down	-	-
MW0001532	1-Benzylpiperazine	苄基哌嗪	Phenolic acids	酚酸类	Phenolic acids	酚酸类	C11H16N2	2	0.7287	-	78926.1	103448	71769.6	363179	321731	361072	1.42502	0.000176415	0.0352405	0.242971	-2.04114	down	-	-
MW0152375	Leu-Ile-Glu-Glu	Leu-Ile-Glu-Glu	Amino acids and derivatives	氨基酸及其衍生物	Amino acids and derivatives	氨基酸及其衍生物	C22H38N4O9	2	0.7286	-	140629	26771.3	35167.4	17731.1	20004.3	6039.83	1.05396	0.284604	0.439016	4.62745	2.21022	up	-	-
MW0150850	His-Asn-Glu	组氨酸-天门冬酰氨-谷氨酸	Amino acids and derivatives	氨基酸及其衍生物	Amino acids and derivatives	氨基酸及其衍生物	C15H22N6O7	2	0.7284	-	136112	130757	128199	394245	375487	343819	1.43759	0.0031119	0.0680309	0.354782	-1.495	down	-	-
MW0153671	Met-Thr-Asn	蛋氨酸-苏氨酸-天冬氨酸	Amino acids and derivatives	氨基酸及其衍生物	Amino acids and derivatives	氨基酸及其衍生物	C13H24N4O6S1	2	0.7279	-	3749.1	3839.69	1224.68	44.4	464.06	166.52	1.26206	0.0840193	0.226124	13.0574	3.70679	up	-	-
MW0155126	Phe-Asp-Glu-Phe-Leu	Phe-Asp-Glu-Phe-Leu	Amino acids and derivatives	氨基酸及其衍生物	Amino acids and derivatives	氨基酸及其衍生物	C33H43N5O10	2	0.7264	-	26655	21180.2	12315	66113.2	73131.5	59675.8	1.3528	0.00128664	0.0554745	0.302383	-1.72555	down	-	-
MW0157029	Ser-Trp	L-丝氨酸-L-色氨酸	Amino acids and derivatives	氨基酸及其衍生物	Amino acids and derivatives	氨基酸及其衍生物	C14H17N3O4	2	0.7255	-	1808.69	3416.23	1730.99	26238.5	19844.7	26271.5	1.41569	0.00659659	0.0820594	0.0961363	-3.37878	down	-	-
MW0152558	Leu-Val-Arg-Lys	Leu-Val-Arg-Lys	Amino acids and derivatives	氨基酸及其衍生物	Amino acids and derivatives	氨基酸及其衍生物	C23H46N8O5	2	0.7253	-	10328.5	5977.4	8125.34	20616.5	18391.9	21106.6	1.35921	0.00244526	0.0669726	0.406409	-1.299	down	-	-
MW0145438	Arg-Lys-His-Arg	Arg-Lys-His-Arg	Amino acids and derivatives	氨基酸及其衍生物	Amino acids and derivatives	氨基酸及其衍生物	C24H45N13O5	2	0.7251	-	628.44	226.28	6508.43	24095.1	27390.1	17537	1.20916	0.00609042	0.0818674	0.106678	-3.22866	down	-	-
MW0157832	Thr-Tyr-Arg-Lys	Thr-Tyr-Arg-Lys	Amino acids and derivatives	氨基酸及其衍生物	Amino acids and derivatives	氨基酸及其衍生物	C25H42N8O7	2	0.7251	-	4997.76	4707.01	5262.84	25731.2	39944	35742.4	1.428	0.0206106	0.125682	0.147584	-2.76039	down	-	-
MW0149677	Gln-Glu-Asp-Glu-Arg	谷酰氨-谷氨酸-天门冬氨酸-谷氨酸-精氨酸	Amino acids and derivatives	氨基酸及其衍生物	Amino acids and derivatives	氨基酸及其衍生物	C25H41N9O13	2	0.7249	-	38373.2	17809	13166.2	130083	133326	87608.9	1.34034	0.0107482	0.0983066	0.197564	-2.33961	down	-	-
MW0151009	His-Lys-Gln-Lys	组氨酸-赖氨酸-谷酰胺-赖氨酸	Amino acids and derivatives	氨基酸及其衍生物	Amino acids and derivatives	氨基酸及其衍生物	C23H41N9O6	2	0.7237	-	59.45	3151.16	2517.86	14693.6	25231.3	22382	1.12427	0.0196736	0.123861	0.0919395	-3.44317	down	-	-
MW0153024	Lys-Leu-Ala-Glu	Lys-Leu-Ala-Glu	Amino acids and derivatives	氨基酸及其衍生物	Amino acids and derivatives	氨基酸及其衍生物	C20H37N5O7	2	0.7222	-	22446.9	27634.2	19336.1	37671.6	45251.5	85056.8	1.21627	0.151585	0.310668	0.413246	-1.27493	down	-	-
MW0146027	Asp-Arg-Lys-Lys	Asp-Arg-Lys-Lys	Amino acids and derivatives	氨基酸及其衍生物	Amino acids and derivatives	氨基酸及其衍生物	C22H43N9O7	2	0.722	-	171784	257431	182891	469538	424373	466553	1.37551	0.0034863	0.0691677	0.449925	-1.15224	down	-	-
MW0105770	Asn-Cys	L-天冬酰胺-L-半胱氨酸	Amino acids and derivatives	氨基酸及其衍生物	Amino acids and derivatives	氨基酸及其衍生物	C7H13N3O4S1	2	0.7217	-	18539.9	38336.7	37775.6	2196.01	3892.79	820.71	1.35267	0.0438422	0.166607	13.6988	3.77598	up	-	-
MW0011866	1,2-Docosahexanoyl-sn-glycero-3-phosphocholine	1,2-二十二碳六烯酰基-sn-甘油-3-磷酸胆碱	GP	甘油磷脂类	PC	磷脂酰胆碱	C52H80NO8P	2	0.7193	-	10101.7	8505.9	5883.27	726.72	1844.58	176.95	1.264	0.0169029	0.115507	8.91144	3.15566	up	C00157	ko00564,ko00590,ko00591,ko00592,ko01100,ko01110
MW0156023	Pro-Tyr-Ala-Tyr-Asp	Pro-Tyr-Ala-Tyr-Asp	Amino acids and derivatives	氨基酸及其衍生物	Amino acids and derivatives	氨基酸及其衍生物	C30H37N5O10	2	0.7186	-	85113.1	70621.4	62943.8	17699.9	15912.9	33088.3	1.33903	0.0043422	0.073561	3.27848	1.71303	up	-	-
MW0158872	Val-Ala-His-Glu	Val-Ala-His-Glu	Amino acids and derivatives	氨基酸及其衍生物	Amino acids and derivatives	氨基酸及其衍生物	C19H30N6O7	2	0.7183	-	2075.17	3058.06	4310.5	13057.3	12945.2	21268.2	1.36773	0.0385779	0.157572	0.19978	-2.32352	down	-	-
MW0156723	Ser-Glu-Ala-Glu-Asp	Ser-Glu-Ala-Glu-Asp	Amino acids and derivatives	氨基酸及其衍生物	Amino acids and derivatives	氨基酸及其衍生物	C20H31N5O13	2	0.7174	-	25774.1	17962.6	37894.4	70888.6	66578.1	100026	1.30887	0.0210269	0.126117	0.34372	-1.54069	down	-	-
MW0151607	Ile-Thr-Tyr-Asp	Ile-Thr-Tyr-Asp	Amino acids and derivatives	氨基酸及其衍生物	Amino acids and derivatives	氨基酸及其衍生物	C23H34N4O9	2	0.717	-	42276.6	57196.2	43126.1	141758	131678	183608	1.40353	0.0157295	0.111872	0.312003	-1.68037	down	-	-
MW0157706	Thr-Leu-Lys-Lys	Thr-Leu-Lys-Lys	Amino acids and derivatives	氨基酸及其衍生物	Amino acids and derivatives	氨基酸及其衍生物	C22H44N6O6	2	0.7169	-	672.6	2444.33	2925.34	7485.2	8641.16	10078.1	1.24631	0.00278348	0.0669726	0.230582	-2.11665	down	-	-
MW0155831	Pro-Gln-Gln-Asp-Glu	Pro-Gln-Gln-Asp-Glu	Amino acids and derivatives	氨基酸及其衍生物	Amino acids and derivatives	氨基酸及其衍生物	C24H37N7O12	2	0.7159	-	38087.3	46218.4	43132.8	90203	84789	89537.8	1.42317	0.000182278	0.0352405	0.481755	-1.05363	down	-	-
MW0153040	Lys-Leu-His-Val-Asp	Lys-Leu-His-Val-Asp	Amino acids and derivatives	氨基酸及其衍生物	Amino acids and derivatives	氨基酸及其衍生物	C27H46N8O8	2	0.7157	-	7320.34	1009.64	5714.18	37849	56647.7	65865	1.30042	0.0227607	0.129895	0.087578	-3.51329	down	-	-
MW0156672	Ser-Asn-Val-Ser-Asp	Ser-Asn-Val-Ser-Asp	Amino acids and derivatives	氨基酸及其衍生物	Amino acids and derivatives	氨基酸及其衍生物	C19H32N6O11	2	0.7126	-	113847	89191.4	104084	35520.3	27045.1	90799.1	1.07225	0.11162	0.264649	2.00257	1.00185	up	-	-
MW0146080	Asp-Gln-Gln-Ala-Glu	Asp-Gln-Gln-Ala-Glu	Amino acids and derivatives	氨基酸及其衍生物	Amino acids and derivatives	氨基酸及其衍生物	C22H35N7O12	2	0.7082	-	56917.9	82880.1	53368	181080	225884	221593	1.39878	0.00198175	0.0632894	0.307317	-1.7022	down	-	-
MW0145407	Arg-Leu-Arg-Glu-Lys	Arg-Leu-Arg-Glu-Lys	Amino acids and derivatives	氨基酸及其衍生物	Amino acids and derivatives	氨基酸及其衍生物	C29H56N12O8	2	0.708	-	17397.7	10593	17924	6744.23	7632.01	1064.24	1.0403	0.032416	0.148042	2.97366	1.57224	up	-	-
MW0150423	Gly-Lys-Lys-Gln-Leu	甘氨酸-赖氨酸-赖氨酸-谷酰胺-亮氨酸	Amino acids and derivatives	氨基酸及其衍生物	Amino acids and derivatives	氨基酸及其衍生物	C25H48N8O7	2	0.7077	-	3665.26	3221.48	3701.69	6062.95	17054.3	14426.8	1.26493	0.113041	0.265844	0.282027	-1.8261	down	-	-
MW0150944	His-Gly-Phe-His-Val	组氨酸-甘氨酸-苯丙氨酸-组氨酸-缬氨酸	Amino acids and derivatives	氨基酸及其衍生物	Amino acids and derivatives	氨基酸及其衍生物	C28H37N9O6	2	0.7071	-	18960.5	21929.9	13203	37102.4	60560.9	49981.6	1.33787	0.031675	0.146632	0.366375	-1.44861	down	-	-
MW0153666	Met-Ser-Ser	甲硫氨酰丝氨酸	Amino acids and derivatives	氨基酸及其衍生物	Amino acids and derivatives	氨基酸及其衍生物	C11H21N3O6S1	2	0.7047	-	124682	177489	163067	348212	363495	219528	1.25225	0.0637903	0.195888	0.499593	-1.00118	down	-	-
MW0158648	Tyr-Tyr-Gln	酪氨酸-酪氨酸-谷氨酰胺	Amino acids and derivatives	氨基酸及其衍生物	Amino acids and derivatives	氨基酸及其衍生物	C23H28N4O7	2	0.7041	-	32390	41121.1	52142.3	96778.8	76496.4	108541	1.32574	0.0141579	0.108164	0.44587	-1.16531	down	-	-
MW0158942	Val-Asp-Pro-Val-Asn	Val-Asp-Pro-Val-Asn	Amino acids and derivatives	氨基酸及其衍生物	Amino acids and derivatives	氨基酸及其衍生物	C23H38N6O9	2	0.7004	-	1296.47	6960.21	4968.45	42176.5	45327	25756.2	1.30559	0.0248834	0.134411	0.116768	-3.09828	down	-	-
MW0061236	PG(20:4(5Z,8Z,11Z,14Z)/22:6(4Z,7Z,10Z,13Z,16Z,19Z))	PG(20:4(5Z,8Z,11Z,14Z)/22:6(4Z,7Z,10Z,13Z,16Z,19Z))	GP	甘油磷脂类	PG	磷脂酰甘油	C48H75O10P	3	0.9937	-	19136	24117.9	20863.6	9761.45	15460.4	6561.19	1.19441	0.0337201	0.15015	2.01735	1.01246	up	-	-
MEDL02561	3-p-Coumaroylquinic acid	3-O-对香豆酰奎宁酸	Phenolic acids	酚酸类	Phenolic acids	酚酸类	C16H18O8	3	0.9896	-	135972	201285	202026	649300	668678	930256	1.4003	0.0196227	0.123861	0.23987	-2.05968	down	-	-
MW0165906	dTDP-3-N,N-dimethylamino-4-oxo-2,3,6-trideoxy-alpha-D-glucose	dTDP-3-N,N-dimethylamino-4-oxo-2,3,6-trideoxy-alpha-D-glucose	Nucleotides and derivatives	核苷酸及其衍生物	Nucleotides and derivatives	核苷酸及其衍生物	C18H28N3O13P2-	3	0.9883	-	206817	408426	560572	88178.6	83309.5	33443.9	1.29884	0.0833141	0.225097	5.73759	2.52044	up	-	-
MW0152599	Leu-Enkephalin,amide	亮氨酸脑啡肽酰胺	Amino acids and derivatives	氨基酸及其衍生物	Amino acids and derivatives	氨基酸及其衍生物	C28H38N6O6	3	0.9874	-	7909.65	5530.7	4672.41	13251.4	15168.2	14927.9	1.36127	0.00351118	0.0691677	0.41785	-1.25894	down	-	-
MW0161765	coproporphyrinogen III(4-)	coproporphyrinogen III(4-)	Others	其它类	Lactones	内酯类化合物	C36H40N4O8-4	3	0.9855	-	701179	703748	638622	1.35615e+06	1.48049e+06	1.48755e+06	1.43424	0.000603267	0.0506524	0.472585	-1.08135	down	-	-
MW0167804	[2-hexadecanoyloxy-3-[hydroxy-[2-(methylamino)ethoxy]phosphoryl]oxypropyl] (Z)-octadec-9-enoate	PE-NMe(18:1(9Z)/16:0)	GL	甘油脂类	DG	甘油二酯	C40H78NO8P	3	0.983	-	36963.3	33213.5	42655	5501.58	1614.99	379.65	1.30092	0.00123339	0.0554745	15.0518	3.91187	up	-	-
MW0011238	2-(hydroxymethyl)-6-[(E)-4-(1,2,4-trihydroxy-2,6,6-trimethylcyclohexyl)but-3-en-2-yl]oxyoxane-3,4,5-triol	2-(羟甲基)-6-[(E)-4-(1,2,4-trihydroxy-2,6,6-trimethylcyclohexyl)but-3-en-2-yl]oxyoxane-3,4,5-三醇	Others	其它类	Saccharides	糖类	C19H34O9	3	0.9829	-	12064.5	15866	19920.6	59705.3	44298.7	58098.6	1.38564	0.00710125	0.0829653	0.295191	-1.76028	down	-	-
ZINC35850717	(5beta,9alpha,10alpha,13S)-19-[(3,4-Dihydroxy-trans-cinnamoyl)oxy]labd-8(20)-en-15-oic acid	（3S)-5-[（1R，4aS，5S，8aS)-5-[[（E)-3-(3，4-二羟基苯基）丙-2-烯酰基]氧甲基]-5，8a-二甲基-2-亚甲基-3，4，4A，6，7，8-六氢-1H-萘-1-基]-3-甲基戊酸	Organic acids	有机酸	Organic acids	有机酸	C29H40O6	3	0.9754	-	7873.65	11418.9	12569.3	47586	52738	31469.9	1.3794	0.0301647	0.14521	0.241755	-2.04838	down	-	-
MW0056785	1-tetradecanoyl-2-(9Z-hexadecenoyl)-sn-glycero-3-phosphocholine	PC(14:0/16:1(9Z))	GP	甘油磷脂类	PC	磷脂酰胆碱	C38H74NO8P	3	0.9726	-	67702.3	113511	174318	13539.7	13540.5	13540.5	1.39887	0.0767092	0.214545	8.7525	3.12969	up	-	-
MW0128622	[2-hydroxy-5-(5,6,7-trihydroxy-4-oxo-4H-chromen-2-yl)phenyl]oxidanesulfonic acid	[2-羟基-5-(5，6，7-三羟基-4-氧代-4H-苯并吡喃-2-基）苯基]氧代磺酸	Organic acids	有机酸	Organic acids	有机酸	C15H10O10S	3	0.9716	-	1207.16	177.4	2323.38	5905.83	6481.37	4808.55	1.12716	0.0055	0.0790937	0.215631	-2.21336	down	-	-
MW0168292	Praecoxin A	早生旌节花素 A	Tannins	鞣质	Tannin	鞣质	C41H28O27	3	0.9694	-	93313	95336.8	111930	31024.2	29371.4	16813.1	1.38594	0.00077452	0.0506524	3.89307	1.96091	up	-	-
ZINC85648309	(1S,4R,10S,13S,16S,19S)-27-methoxy-13-[(4-methoxyphenyl)methyl]-4,12,16,18,32-pentamethyl-25-oxa-3,6,12,15,18,32-hexazapentacyclo[17.12.2.221,24.126,30.06,10]hexatriaconta-21,23,26,28,30(34),35-hexaene-2,5,7,11,14,17,33-heptone	（1S，4R，10S，13S，16S，19S)-27-甲氧基-13-[（4-甲氧基苯基）甲基]-4，12，16，18，32-五甲基-25-氧杂-3，6，12，15，18，32-六氮杂五环[17.1 2.2.221，24.126，30.06，10]六三正二十烷-21，23，26，28，30（34）35-六烯-2，5，7，11，14，17，	Lignans and Coumarins	木脂素和香豆素	Lignans	木脂素	C43H50N6O10	3	0.9655	-	32219.2	78162.5	72471.5	243543	284142	374670	1.34868	0.0158148	0.112032	0.20264	-2.30301	down	-	-
MW0114594	Hexapropylene glycol monobutyl ether	六丙二醇单丁醚	Alcohol and amines	醇、胺类	Alcohols	醇类	C22H46O7	3	0.9259	-	157687	197688	127271	45430.1	72521.6	67071.4	1.33563	0.0266213	0.13743	2.60857	1.38326	up	-	-
MW0011283	(3S,5R,6S,7E,9x)-7-Megastigmene-3,6,9-triol 9-glucoside	(3S,5R,6S,7E,9x)-7-Megastigmene-3,6,9-triol 9-glucoside	Others	其它类	Saccharides	糖类	C19H34O8	3	0.9214	-	6165.83	5898.69	6567.73	47888.3	28667.9	32660.5	1.41878	0.035488	0.153149	0.170599	-2.55132	down	-	-
MW0056825	PC(14:1(9Z)/18:4(6Z,9Z,12Z,15Z))	PC(14:1(9Z)/18:4(6Z,9Z,12Z,15Z))	GP	甘油磷脂类	PC	磷脂酰胆碱	C40H70NO8P	3	0.909	-	86990.2	98357.5	54981.2	12796.2	13083.6	27531.8	1.3363	0.0288146	0.141392	4.49956	2.16978	up	-	-
MW0011813	1-(6Z,9Z,12Z,15Z-octadecatetraenoyl)-glycero-3-phosphate	1-(6Z,9Z,12Z,15Z-十八碳四烯酰基)-甘油-3-磷酸	GP	甘油磷脂类	PA	磷脂酸	C21H35O7P	3	0.8982	-	21546.5	24514.7	18534.1	51847.6	43159.1	43882.5	1.39822	0.00326955	0.0680309	0.465085	-1.10443	down	-	-
ZINC85493813	2-(1,7-Dihydroxy-6,8-dimethoxy-3-methyl-5-propan-2-ylnaphthalen-2-yl)-6,8-dimethoxy-3-methyl-5-propan-2-ylnaphthalene-1,7-diol	2-(1，7-二羟基-6，8-二甲氧基-3-甲基-5-丙-2-基萘-2-基)-6，8-二甲氧基-3-甲基-5-丙-2-基萘-1，7-二醇	Benzene and substituted derivatives	苯及其衍生物	Benzene and substituted derivatives	苯及其衍生物	C32H38O8	3	0.8923	-	24240.5	20655.2	17939.8	5019.34	11649.6	9960.12	1.23454	0.0112536	0.10061	2.35966	1.23858	up	-	-
MW0159212	Val-Tyr-Gln-His-Val	Val-Tyr-Gln-His-Val	Amino acids and derivatives	氨基酸及其衍生物	Amino acids and derivatives	氨基酸及其衍生物	C30H44N8O8	3	0.8726	-	207064	189547	134491	78692.3	67311	66890.3	1.37234	0.0364844	0.154883	2.49468	1.31885	up	-	-
MW0150183	Glu-Tyr-Arg-Asp	谷氨酸-酪氨酸-精氨酸-天门冬氨酸	Amino acids and derivatives	氨基酸及其衍生物	Amino acids and derivatives	氨基酸及其衍生物	C24H35N7O10	3	0.8713	-	6893.75	4464.91	3688.91	2472.97	2410.39	938.83	1.1605	0.0662004	0.200633	2.58452	1.3699	up	-	-
MW0016578	CDP-DG(a-13:0/a-17:0)	CDP-DG(a-13:0/a-17:0)	GL	甘油脂类	DG	甘油二酯	C42H77N3O15P2	3	0.8424	-	17503.2	23655.1	21239.5	5729.84	12980.5	3932.1	1.21491	0.0214483	0.126559	2.75579	1.46247	up	-	-
MW0163163	[(Iminiomethyl)amino]acetate	[(亚氨基甲基)氨基]乙酸盐	Others	其它类	Lactones	内酯类化合物	C3H6N2O2	3	0.8405	-	10074.1	11317.8	11615.8	26645.2	40615.8	34498.7	1.40445	0.0283545	0.140311	0.324368	-1.62429	down	-	-
MW0061562	PGP(i-12:0/i-12:0)	PGP(i-12:0/i-12:0)	GP	甘油磷脂类	PG-P	磷脂酰甘油磷酸	C30H60O13P2	3	0.8257	-	283699	213665	179786	87199.8	56154	41361	1.34618	0.0197776	0.124347	3.66592	1.87418	up	-	-
MW0131723	3,4,5-trihydroxy-6-[(3-hydroxy-4-oxo-2-phenyl-4H-chromen-5-yl)oxy]oxane-2-carboxylic acid	3，4，5-三羟基-6-[（3-羟基-4-氧代-2-苯基-4H-苯并吡喃-5-基）氧基]恶烷-2-羧酸	Organic acids	有机酸	Organic acids	有机酸	C21H18O10	3	0.8142	-	8140.6	16813.9	16965.2	3787.46	4606.6	1531.64	1.26083	0.0563293	0.184305	4.22335	2.07839	up	-	-
MW0149657	Gln-Cys-His	谷酰氨-半胱氨酸-组氨酸	Amino acids and derivatives	氨基酸及其衍生物	Amino acids and derivatives	氨基酸及其衍生物	C14H22N6O5S1	3	0.8124	-	49016.8	46740.9	53135.6	119473	103272	139466	1.40964	0.0184154	0.119891	0.411068	-1.28255	down	-	-
ZINC85948878	Deoxycalyxin A 3'-hydroperoxide	（E)-1-[3-[（E，3R，5S)-5-氢过氧-1，7-双（4-羟基苯基）庚-1-烯-3-基]-2，4-二羟基-6-甲氧基苯基]-3-(4-羟基苯基）丙-2-烯-1-酮	Others	其它类	Ketone compounds	酮类化合物	C35H34O9	3	0.8101	-	12358	19999	12210.6	35487.6	36197.3	45108.1	1.35748	0.00435781	0.073561	0.381596	-1.38988	down	-	-
MW0015865	Arachidonoyl-1-thioglycerol	花生四烯酰基-1-硫代甘油	FA	脂肪酰类	Others	其它	C23H38O3S	3	0.8096	-	59920	32595.9	36934.4	17045.8	23796.9	16491.7	1.25964	0.0959448	0.243307	2.25781	1.17493	up	-	-
MEDP1444	FFA(18:5)	十八碳五烯酸	Lipids	脂质	Free fatty acids	游离脂肪酸	C18H26O2	3	0.7957	-	49363.5	62640.2	76120.7	146270	209263	456919	1.2753	0.158521	0.318551	0.231551	-2.1106	down	-	-
MW0059311	PE-NMe(15:0/20:5(5Z,8Z,11Z,14Z,17Z))	PE-NMe(15:0/20:5(5Z,8Z,11Z,14Z,17Z))	GP	甘油磷脂类	PE	磷脂酰乙醇胺	C41H72NO8P	3	0.7821	-	11639.9	639.15	9505.81	56000	75282	66793.5	1.1899	0.00198745	0.0632894	0.109983	-3.18465	down	-	-
MW0133232	2',4',6'-Trihydroxy-3',5'-diprenyldihydrochalcone	3-苯基-1-[2，4，6-三羟基-3，5-双（3-甲基丁-2-烯-1-基）苯基]-1-丙酮	Others	其它类	Ketone compounds	酮类化合物	C25H30O4	3	0.7808	-	9828	13426.5	13219.3	29421.9	20243	101469	1.10331	0.274978	0.43032	0.241335	-2.05089	down	-	-
MEDP1446	Octadecadienamide	十八碳二烯酰胺	Alcohol and amines	醇、胺类	Amines	胺类	C18H33NO	3	0.7806	-	142308	137535	135951	1671.21	1747.98	446.25	1.41875	0.000101457	0.0276919	107.567	6.74909	up	-	-
MW0127818	(1S,3R,4R,5R)-3-[(E)-3-[2-(3,4-dihydroxyphenyl)-7-hydroxy-3-methoxycarbonyl-2,3-dihydro-1-benzofuran-5-yl]prop-2-enoyl]oxy-1,4,5-trihydroxycyclohexane-1-carboxylic acid	(1S,3R,4R,5R)-3-[(E)-3-[2-(3,4-dihydroxyphenyl)-7-hydroxy-3-methoxycarbonyl-2,3-dihydro-1-benzofuran-5-yl]prop-2-enoyl]oxy-1,4,5-trihydroxycyclohexane-1-carboxylic acid	Organic acids	有机酸	Organic acids	有机酸	C26H26O13	3	0.7798	-	7026.66	10087.7	7035.33	26248.1	19541	35782.2	1.36163	0.0499736	0.176211	0.296056	-1.75606	down	-	-
MEDL00403	2-Hexadecenal	2-十六碳烯醛	FA	脂肪酰类	Others	其它	C16H30O	3	0.7772	-	571951	629091	583108	12742.9	8102.14	3680.53	1.42364	0.000704049	0.0506524	72.7465	6.18481	up	C06123	-
MEDP1430	Carnitine C7:0	肉碱 C7:0	FA	脂肪酰类	CAR	酰基肉碱	C14H27NO4	3	0.7696	-	22822.7	15654.8	10990.9	78228.9	81195.3	82615.7	1.39945	0.00100335	0.0554232	0.204381	-2.29066	down	-	-
MW0141505	17-(4-Hydroxyphenyl)heptadecanoic acid	17-(4-羟基苯基）十七烷酸酯	Lipids	脂质	Free fatty acids	游离脂肪酸	C23H38O3	3	0.7587	-	11521.4	17791.1	21550.9	87556.6	78552.3	57674.1	1.37953	0.0153187	0.11117	0.227289	-2.1374	down	C21446	-
MEDP1438	Carnitine C6:1	肉碱 C6:1	FA	脂肪酰类	CAR	酰基肉碱	C13H23NO4	3	0.7515	-	49932.2	40779.8	46632.2	18386.4	30744.7	8281.11	1.14366	0.0395598	0.158838	2.39225	1.25837	up	-	-
MEDL00404	2-Palmitoyl-rac-glycerol	2-棕榈酰甘油	GL	甘油脂类	DG	甘油二酯	C19H38O4	3	0.7494	-	6490.02	6200.02	7470.43	17724	16756.2	16648.2	1.42925	4.03647e-05	0.0180449	0.39431	-1.3426	down	-	-
MW0146210	Asp-Met-Leu-Asp-Leu	Asp-Met-Leu-Asp-Leu	Amino acids and derivatives	氨基酸及其衍生物	Amino acids and derivatives	氨基酸及其衍生物	C25H43N5O10S	3	0.7474	-	2055.89	1124.51	1510.22	5641.07	4760.06	3715.32	1.3482	0.0160986	0.112789	0.33228	-1.58953	down	-	-
MW0060014	PE-NMe(22:6(4Z,7Z,10Z,13Z,16Z,19Z)/22:6(4Z,7Z,10Z,13Z,16Z,19Z))	PE-NMe(22:6(4Z,7Z,10Z,13Z,16Z,19Z)/22:6(4Z,7Z,10Z,13Z,16Z,19Z))	GP	甘油磷脂类	PE	磷脂酰乙醇胺	C50H76NO8P	3	0.7458	-	12051.4	15979.8	14741.3	1593.51	8673.46	5550.69	1.09555	0.028827	0.141392	2.70409	1.43514	up	-	-
MEDN1251	LPI(16:0/0:0)	LPI(16:0/0:0)	GP	甘油磷脂类	PI	磷脂酰肌醇	C25H49O12P	3	0.7429	-	4785.28	4151.32	4802.67	8380.46	10018.2	9333.28	1.41365	0.00393451	0.0721587	0.495432	-1.01324	down	-	-
MW0163638	9-(Methylthio)-2-oxononanoate	9-(甲硫基)-2-氧代壬酸酯	Others	其它类	Lactones	内酯类化合物	C10H17O3S-	3	0.7401	-	6927.54	6552.02	5670.75	866.09	1656.35	2089.14	1.35349	0.000725031	0.0506524	4.15266	2.05403	up	-	-
MW0151475	Ile-Ile-Met	L-异亮氨酸-L-异亮氨酸-L-蛋氨酸	Amino acids and derivatives	氨基酸及其衍生物	Amino acids and derivatives	氨基酸及其衍生物	C17H33N3O4S1	3	0.739	-	12657.3	11976.4	11154.3	33861	26358.3	30278.7	1.42141	0.0113693	0.101449	0.395456	-1.33841	down	-	-
MW0128816	[5-(3,7-dihydroxy-3,4-dihydro-2H-1-benzopyran-2-yl)-2-hydroxyphenyl]oxidanesulfonic acid	[5-(3,7-二羟基-3,4-二氢-2H-1-苯并吡喃-2-基)-2-羟基苯基]氧化磺酸	Organic acids	有机酸	Organic acids	有机酸	C15H14O8S	3	0.7384	-	1891.77	4010.98	6681.64	14172	8362.67	18886.8	1.18031	0.0694354	0.20613	0.303813	-1.71874	down	-	-
MW0131460	2,3-(S)-hexahydroxydiphenoyl-D-glucose	2,3-(S)-六羟基二苯酰基-D-葡萄糖	Phenolic acids	酚酸类	Phenolic acids	酚酸类	C20H18O14	3	0.7377	-	22017.3	19586.5	24653.7	5636.32	8454.93	3139.67	1.33348	0.00154096	0.0596812	3.84527	1.94308	up	-	-
MW0166079	Acylsucrose S4:17[2](2,5,5,5)	酰基蔗糖 S4:17[2](2,5,5,5)	Others	其它类	Lactones	内酯类化合物	C29H48O15	3	0.7375	-	1695.65	2122.66	2348.34	708.19	1254.7	936.21	1.29445	0.0127753	0.104116	2.12709	1.08888	up	-	-
MEDP1352	Palythene	Palythene	Amino acids and derivatives	氨基酸及其衍生物	Amino acids and derivatives	氨基酸及其衍生物	C13H20N2O5	3	0.7363	-	2510.29	1753.55	1231.49	8107.95	6217.33	13681.1	1.35004	0.0750189	0.212508	0.196217	-2.34948	down	-	-
pmp001271	1-Linoleoyl-sn-glycerol-diglucoside	1-亚油酸单甘油酯-二葡萄糖苷	Lipids	脂质	Free fatty acids	游离脂肪酸	C33H58O14	3	0.7264	-	17952.1	6348.41	11202.3	37274.2	25581.4	21883.9	1.16464	0.0510027	0.176982	0.418964	-1.2551	down	-	-
MW0113347	6-(3-Ethenylphenoxy)-3,4,5-trihydroxyoxane-2-carboxylic acid	6-(3-乙烯基苯氧基)-3，4，5-三羟基恶烷-2-羧酸	Organic acids	有机酸	Organic acids	有机酸	C14H16O7	3	0.7258	-	6379.49	18365.6	17517	7030.16	5497.92	4638.75	1.07765	0.158846	0.318564	2.46185	1.29974	up	-	-
MW0012810	1-hexadecanoyl-2-(9Z,12Z-octadecadienoyl)-sn-glycero-3-phospho-D-myo-inositol	1-hexadecanoyl-2-(9Z,12Z-octadecadienoyl)-sn-glycero-3-phospho-D-myo-inositol	GP	甘油磷脂类	PI	磷脂酰肌醇	C43H79O13P	3	0.7257	-	110994	77103.8	203297	29213.9	37727.8	36548.8	1.31114	0.125179	0.279784	3.78194	1.91913	up	-	-
MW0150013	Glu-Gly-Leu-Arg-Gln	谷氨酸-甘氨酸-亮氨酸-精氨酸-谷酰胺	Amino acids and derivatives	氨基酸及其衍生物	Amino acids and derivatives	氨基酸及其衍生物	C24H43N9O9	3	0.7246	-	363.09	208.8	502.59	2708.68	3219.2	1428.52	1.35041	0.0557458	0.183969	0.146061	-2.77536	down	-	-
MW0108932	N-Undecanoylglycine	N-十一烷酰甘氨酸	Amino acids and derivatives	氨基酸及其衍生物	Amino acids and derivatives	氨基酸及其衍生物	C13H25NO3	3	0.723	-	2012.96	2270.25	2035.83	525.29	829.41	1042.55	1.33435	0.00414349	0.0725502	2.63595	1.39833	up	-	-
MW0112601	3,4,5-Trihydroxy-6-[3-(6-hydroxy-7-methoxy-1,3-benzodioxol-5-yl)propanoyloxy]oxane-2-carboxylic acid	3，4，5-三羟基-6-{[3-(6-羟基-7-甲氧基-2H-1，3-苯并间二氧杂环戊烯-5-基）丙酰基]氧}氧杂环己烷-2-羧酸	Organic acids	有机酸	Organic acids	有机酸	C17H20O12	3	0.7222	-	1256.52	5835.98	4021.19	11309.3	11767.6	9080.53	1.14648	0.0164415	0.113467	0.345603	-1.53281	down	-	-
MEDTP01862	MG(18:4/0:0/0:0)	MG(18:4/0:0/0:0)	GL	甘油脂类	MG	单甘油酯	C21H34O4	3	0.7214	-	20341.5	43019	19632.2	66490.8	87300.4	148686	1.27599	0.086317	0.229651	0.274377	-1.86577	down	-	-
MW0139873	N-(7,8-Dimethoxy-2-oxochromen-3-YL)-4A,5,8-trihydroxy-N-methyl-4,5,8,8A-tetrahydro-1,2-benzoxazine-3-carboxamide	N-(7,8-Dimethoxy-2-oxochromen-3-YL)-4A,5,8-trihydroxy-N-methyl-4,5,8,8A-tetrahydro-1,2-benzoxazine-3-carboxamide	Alcohol and amines	醇、胺类	Amines	胺类	C21H22N2O9	3	0.7211	-	3998.4	7657.18	8600.63	21337.2	18480.6	26046.5	1.32549	0.00714847	0.0829653	0.307545	-1.70113	down	-	-
MW0145607	Arg-Lys-Glu-Val-Tyr acetate salt	Arg-Lys-Glu-Val-Tyr 醋酸盐	Amino acids and derivatives	氨基酸及其衍生物	Amino acids and derivatives	氨基酸及其衍生物	C33H55N9O11	3	0.7211	-	23483	30462.3	23379.4	4043.23	5963.12	763.1	1.25846	0.00253039	0.0669726	7.18	2.84398	up	-	-
MW0193352	Tricin-4'-O-rutinoside-7-O-rutinoside	苜蓿素-4'-O-芸香糖苷-7-O-芸香糖苷	Flavonoids	黄酮	Flavones	黄酮	C41H54O25	3	0.7195	-	21055.5	31168.1	32974	18848.8	14183.8	3359.67	1.0024	0.0534567	0.181451	2.34109	1.22718	up	-	-
MW0012979	1-Palmitoylglycerophosphocholine	1-棕榈酰甘油磷酸胆碱	GP	甘油磷脂类	PC	磷脂酰胆碱	C24H51NO7P+	3	0.7187	-	1.00739e+06	1.17737e+06	939384	2.31656e+06	2.20565e+06	2.53343e+06	1.41858	0.000612901	0.0506524	0.442787	-1.17531	down	C04102	-
MEDL01885	5-Acetamidovalerate	5-乙酰氨基戊酸	Organic acids	有机酸	Organic acids	有机酸	C7H13NO3	3	0.7172	-	19720.7	37513.1	22246	94609.3	69142.6	91466.8	1.35444	0.0055669	0.0790937	0.311419	-1.68307	down	C03087	ko00310,ko01100
MW0163098	All-trans-heptaprenyl diphosphate(3-)	全反式庚二磷酸(3-)	Organic acids	有机酸	Organic acids	有机酸	C35H57O7P2-3	3	0.7157	-	153043	97748.3	163797	67708.7	92647.9	29380.5	1.08635	0.0534213	0.181451	2.18507	1.12768	up	-	-
MEDP1221	PC(O-16:0/O-1:0)	PC(O-16:0/O-1:0)	Lipids	脂质	LPC	溶血磷脂酰胆碱	C25H54NO6P	3	0.7152	-	106370	106966	77642.7	53198.2	53338.8	37633.1	1.31442	0.0200765	0.124817	2.01831	1.01314	up	-	-
MW0165461	(3S,7R)-11-methoxy-3,7-dimethyl-6,8,16,20-tetraoxapentacyclo[10.8.0.02,9.03,7.013,18]icosa-1,4,9,11,13(18)-pentaene-17,19-dione	(3S,7R)-11-methoxy-3,7-dimethyl-6,8,16,20-tetraoxapentacyclo[10.8.0.02,9.03,7.013,18]icosa-1,4,9,11,13(18) -戊烯-17,19-二酮	Others	其它类	Ketone compounds	酮类化合物	C19H16O7	3	0.7137	-	5466.94	1671.56	3068.66	7637.95	7031.57	12699.5	1.16516	0.0653183	0.199037	0.372946	-1.42296	down	-	-
MW0150482	Gly-Ser-Tyr	甘氨酸-丝氨酸-酪氨酸	Amino acids and derivatives	氨基酸及其衍生物	Amino acids and derivatives	氨基酸及其衍生物	C14H19N3O6	3	0.713	-	16658.8	5963.13	7547.91	1004.01	3573.56	2867.45	1.1791	0.144907	0.301806	4.05235	2.01876	up	-	-
MW0060081	PE-NMe(9D3/9D3)	PE-NMe(9D3/9D3)	GP	甘油磷脂类	PE	磷脂酰乙醇胺	C42H72NO10P	3	0.7123	-	41290.7	79697.1	37043.6	12246.7	23280.5	14670.5	1.26301	0.110327	0.26304	3.14818	1.65452	up	-	-
MW0058411	PE(18:4(6Z,9Z,12Z,15Z)/P-18:1(11Z))	PE(18:4(6Z,9Z,12Z,15Z)/P-18:1(11Z))	GP	甘油磷脂类	PE	磷脂酰乙醇胺	C41H72NO7P	3	0.7123	-	20519	26104.9	28983.5	59103.7	107741	88183.1	1.36441	0.0477563	0.173523	0.296467	-1.75405	down	-	-
MW0112385	3,4,5-trihydroxy-6-(3-hydroxy-5-methoxybenzoyloxy)oxane-2-carboxylic acid	3，4，5-三羟基-6-(3-羟基-5-甲氧基苯甲酰氧基）恶烷-2-羧酸	Organic acids	有机酸	Organic acids	有机酸	C14H16O10	3	0.7108	-	35160.3	29792.9	24510.4	11810.2	8051.36	883.78	1.09722	0.00674004	0.0823916	4.31246	2.10851	up	-	-
ZINC38822226	(2R,3S,4S,5R,6R)-2-(hydroxymethyl)-6-[4-[(E)-3-hydroxyprop-1-enyl]-2-methoxyphenoxy]oxane-3,4,5-triol	（2R，3S，4S，5R，6R)-2-(羟甲基)-6-[4-[（E)-3-羟基丙-1-烯基]-2-甲氧基苯氧基]恶烷-3，4，5-三醇	Alcohol and amines	醇、胺类	Alcohols	醇类	C16H22O8	3	0.7079	-	35109.8	257133	90495.6	18948	28768.8	22257.8	1.10562	0.258438	0.416806	5.46967	2.45145	up	-	-
MW0145715	Asn-Cys-Ser	L-天冬酰胺-L-半胱氨酰-L-丝氨酸	Amino acids and derivatives	氨基酸及其衍生物	Amino acids and derivatives	氨基酸及其衍生物	C10H18N4O6S1	3	0.7078	-	3944.1	6438.34	3292.36	16118	16293.3	11942.3	1.35467	0.0059737	0.0805755	0.308313	-1.69753	down	-	-
MW0013762	3,4,5-Trihydroxy-6-(3-phenylpropoxy)oxane-2-carboxylic acid	3,4,5-三羟基-6-(3-苯基丙氧基）氧烷-2-羧酸	Organic acids	有机酸	Organic acids	有机酸	C15H20O7	3	0.7064	-	45023.6	52135.4	100063	410821	540774	410319	1.39169	0.00595499	0.0805574	0.144812	-2.78774	down	-	-
MW0150379	Gly-His-Tyr	甘氨酸-组氨酸-酪氨酸	Amino acids and derivatives	氨基酸及其衍生物	Amino acids and derivatives	氨基酸及其衍生物	C17H21N5O5	3	0.7063	-	739.88	2911.42	3276.83	5277.62	4797.78	9631.38	1.07344	0.0908737	0.236751	0.351561	-1.50815	down	-	-
MW0013795	3,4,5-Trihydroxy-6-[1-(4-methoxyphenyl)pentan-3-yloxy]oxane-2-carboxylic acid	3，4，5-三羟基-6-{[1-(4-甲氧基苯基）戊烷-3-基]氧}氧杂环己烷-2-羧酸	Organic acids	有机酸	Organic acids	有机酸	C18H26O8	3	0.7042	-	32396.5	20680.2	23723.3	10193.4	4601.95	7551.03	1.32937	0.0210744	0.126117	3.4368	1.78107	up	-	-
MW0144050	8-Epideoxyloganin tetraacetate	8-表脱氧马钱子素四乙酸酯	Others	其它类	Lactones	内酯类化合物	C25H34O13	3	0.7035	-	4488.15	6945.5	3704.5	12636.9	15266.8	13521.6	1.35491	0.00259891	0.0669726	0.365432	-1.45232	down	-	-
MEDN1255	LPI(18:2/0:0)	LPI(18:2/0:0)	GP	甘油磷脂类	PI	磷脂酰肌醇	C27H49O12P	3	0.7035	-	825.74	2914.34	2236.6	7513.65	6716.11	7498.92	1.2647	0.0061459	0.0818674	0.27506	-1.86218	down	-	-
MW0161401	2,5-dimethyl-4-hydroxy-3(2H)-furanone beta-D-glucopyranoside	2,5-二甲基-4-羟基-3(2H)-呋喃酮β-D-吡喃葡萄糖苷	Others	其它类	Ketone compounds	酮类化合物	C12H18O8	3	0.7006	-	1325.48	896.38	871.37	2694.2	3119.15	3950.32	1.38272	0.0159757	0.112655	0.31681	-1.65831	down	-	-
MW0152230	Leu-Arg-Met-Leu-Leu	Leu-Arg-Met-Leu-Leu	Amino acids and derivatives	氨基酸及其衍生物	Amino acids and derivatives	氨基酸及其衍生物	C29H56N8O6S	3	0.6996	-	1784.13	2264.39	1488.4	25697.4	30054.3	30808.8	1.43689	0.00296655	0.0680309	0.0639659	-3.96655	down	-	-
MW0154401	Neu5Ac2-3LacDiNAcSp	Neu5Ac2-3LacDiNAcSp	Others	其它类	Saccharides	糖类	C29H48N6O19	3	0.6993	-	268731	206296	214107	118975	47667.1	17358.5	1.18089	0.0134769	0.106349	3.74529	1.90508	up	-	-
MW0156648	Ser-Arg-Met	丝氨酰-精氨酰-蛋氨酸	Amino acids and derivatives	氨基酸及其衍生物	Amino acids and derivatives	氨基酸及其衍生物	C14H28N6O5S1	3	0.699	-	100907	82906.9	62694.5	35061.8	30208.9	22068.4	1.34839	0.0300383	0.145034	2.82243	1.49694	up	-	-
MW0159113	Val-Met-Tyr	缬氨酸-甲硫氨酸-酪氨酸	Amino acids and derivatives	氨基酸及其衍生物	Amino acids and derivatives	氨基酸及其衍生物	C19H29N3O5S1	3	0.6977	-	2284.48	1954.83	226.4	14994.3	9564.26	10168.1	1.22956	0.0180025	0.118882	0.128596	-2.95908	down	-	-
MW0116853	1-acetyl-10a,12a-dimethyl-4,4a,4b,5,6,10b,11,12-octahydro-1H-naphtho[2,1-f]isochromene-3,8-dione	1-acetyl-10a,12a-dimethyl-4,4a,4b,5,6,10b,11,12-octahydro-1H-naphtho[2,1-f]isochromene-3,8-dione	Others	其它类	Ketone compounds	酮类化合物	C21H26O4	3	0.6973	-	388.84	605.05	859.97	1662.01	2907.47	1557.09	1.28483	0.0703265	0.206267	0.302593	-1.72455	down	-	-
MW0063221	1-beta-D-Galactosylsphingosine	1-β-D-半乳糖基鞘氨醇	Lipids	脂质	Sphingolipids	鞘脂	C24H47NO7	3	0.6969	-	30167.4	34747.3	30728.1	55547.6	63511.8	77187.1	1.38451	0.0286311	0.140747	0.487361	-1.03694	down	-	-
MW0107687	S-Glutathionyl-L-cysteine	S-谷胱甘肽-L-半胱氨酸	Amino acids and derivatives	氨基酸及其衍生物	Amino acids and derivatives	氨基酸及其衍生物	C13H22N4O8S2	3	0.6966	-	353215	202821	235583	146311	141275	38125.5	1.05904	0.0582629	0.186185	2.43043	1.28121	up	C05526	ko00270,ko01100
MW0147976	Cys-Ala-Pro-Pro-Thr	半胱氨酸-丙氨酸-脯氨酸-脯氨酸-苏氨酸	Amino acids and derivatives	氨基酸及其衍生物	Amino acids and derivatives	氨基酸及其衍生物	C20H33N5O7S	3	0.6964	-	203929	117726	154362	37049.1	54698	42762.3	1.37661	0.0400325	0.158838	3.53892	1.82331	up	-	-
ZINC70455327	7-O-galloyl-sedoheptulose	[（2R，3R，4R，5S)-2，3，4，5，7-五羟基-6-氧代庚基]3，4，5-三羟基苯甲酸酯	Organic acids	有机酸	Organic acids	有机酸	C14H18O11	3	0.6962	-	1881.01	2984.58	1900.11	7402.59	8025.05	11909.2	1.38246	0.0330008	0.148808	0.247494	-2.01454	down	-	-
MW0150193	Glu-Tyr-Ile-Glu	谷氨酸-酪氨酸-异亮氨酸-谷氨酸	Amino acids and derivatives	氨基酸及其衍生物	Amino acids and derivatives	氨基酸及其衍生物	C25H36N4O10	3	0.696	-	59977.1	61298.3	74045.5	25610.6	20272.2	29861.8	1.39305	0.00329482	0.0680309	2.57868	1.36663	up	-	-
MW0001231	1-(Pentanoylamino)-N-((2'-(1H-tetrazol-5-yl)biphenyl-4-yl)methyl)cyclopentanecarboxamide	1-(戊酰氨基)-N-((2'-(1H-四唑-5-基)联苯-4-基)甲基)环戊烷甲酰胺	Benzene and substituted derivatives	苯及其衍生物	Benzene and substituted derivatives	苯及其衍生物	C25H30N6O2	3	0.6958	-	480.06	478.86	1681.19	3980.05	5054.89	3973.95	1.29519	0.00314352	0.0680309	0.202947	-2.30083	down	-	-
MEDP2074	Indirubin-3'-monoxime	靛玉红-3'-单肟	Benzene and substituted derivatives	苯及其衍生物	Benzene and substituted derivatives	苯及其衍生物	C16H11N3O2	3	0.6956	-	911.78	3880.14	4701.9	15051.5	19838.1	65564.3	1.24373	0.199802	0.360351	0.0945092	-3.4034	down	-	-
MW0168358	NCGC00381206-01_C40H60O10_1-Naphthalenebutanoic acid, decahydro-beta,6-dihydroxy-alpha-(2-hydroxyethylidene)-5-(hydroxymethyl)-5,8a-dimethyl-2-methylene-, (4E)-4-[2-[(1R,4aS,5R,6R,8aS)-decahydro-6-hydroxy-5-(hydroxymethyl)-5,8a-dimethyl-2-methylene-1-naphthalenyl]ethylidene]tetrahydro-5-oxo-3-furanyl ester, (alphaE,1R,4aS,5R,6R,8aS)-	NCGC00381206-01_C40H60O10_1-萘丁酸，十氢-β，6-二羟基-α-(2-羟基亚乙基)-5-(羟甲基)-5,8a-二甲基-2-亚甲基-，(4E)-4-[2-[ (1R,4aS,5R,6R,8aS)-十氢-6-羟基-5-(羟甲基)-5,8a-二甲基-2-亚甲基-1-萘基]亚乙基]四氢-5-氧代-3-呋喃酯, (alphaE,1R,4aS,5R,6R,8aS)-	Others	其它类	Lactones	内酯类化合物	C40H60O10	3	0.6945	-	7840.08	17742.2	14586.3	37039.3	24442.6	19804.8	1.09771	0.0989125	0.247383	0.494159	-1.01695	down	-	-
MW0150091	Glu-Met-Leu-Val-Ala	谷氨酸-蛋氨酸-亮氨酸-缬氨酸-丙氨酸	Amino acids and derivatives	氨基酸及其衍生物	Amino acids and derivatives	氨基酸及其衍生物	C24H43N5O8S	3	0.6937	-	1718.6	5863.49	3720.49	18113.9	16239.9	76070.4	1.25023	0.234187	0.392799	0.102356	-3.28833	down	-	-
MW0165972	3-[2-[3-[[(2R)-4-[[[(2R,3S,4R,5R)-5-(6-aminopurin-9-yl)-4-hydroxy-3-phosphonatooxyoxolan-2-yl]methoxy-oxidophosphoryl]oxy-oxidophosphoryl]oxy-2-hydroxy-3,3-dimethylbutanoyl]amino]propanoylamino]ethylsulfanylcarbonyl]-4-oxo-4-phenylbutanoate	3-[2-[3-[[(2R)-4-[[[(2R,3S,4R,5R)-5-(6-aminopurin-9-yl)-4-hydroxy-3-phosphonatooxyoxolan-2 -基]甲氧基-氧化磷酰基]氧基-氧化磷酰基]氧基-2-羟基-3,3-二甲基丁酰基]氨基]丙酰基氨基]乙基硫烷基羰基]-4-氧代-4-苯基丁酸酯	Organic acids	有机酸	Organic acids	有机酸	C32H39N7O20P3S-5	3	0.6935	-	831942	990753	748197	288906	334462	142539	1.32201	0.00321288	0.0680309	3.35666	1.74703	up	-	-
MW0109856	Thr-Asn	苏氨酸-天冬酰胺	Amino acids and derivatives	氨基酸及其衍生物	Amino acids and derivatives	氨基酸及其衍生物	C8H15N3O5	3	0.6929	-	12040.3	22972.3	6645.18	29179.4	26843.6	37790.5	1.13106	0.0473948	0.172751	0.444049	-1.17121	down	-	-
MW0153510	Met-Asn-Ser-Phe-Val	Met-Asn-Ser-Phe-Val	Amino acids and derivatives	氨基酸及其衍生物	Amino acids and derivatives	氨基酸及其衍生物	C26H40N6O8S	3	0.6923	-	10781	7992.07	8035.89	32187.4	51703.1	41192.8	1.41008	0.0258075	0.136464	0.214328	-2.22211	down	-	-
MW0147080	Carapin-8(9)-ene	Carapin-8(9)-烯	Others	其它类	Hydrocarbon derivatives	烃衍生物	C27H30O7	3	0.6922	-	14832.3	8723.74	5231.44	79012.9	78041	61279.1	1.38641	0.00255208	0.0669726	0.131851	-2.92301	down	-	-
MW0150432	Gly-Lys-Val-Lys-Lys	甘氨酸-赖氨酸-缬氨酸-赖氨酸-赖氨酸	Amino acids and derivatives	氨基酸及其衍生物	Amino acids and derivatives	氨基酸及其衍生物	C25H50N8O6	3	0.6901	-	2482.38	1030.2	1150.54	6271.21	8301.13	4894.11	1.32969	0.0227877	0.129895	0.239547	-2.06162	down	-	-
MW0012778	1-Docosanoyl-sn-glycero-3-phosphocholine	1-Behenoyl-2-hydroxy-sn-glycero-3-phosphocholine	GP	甘油磷脂类	PC	磷脂酰胆碱	C30H62NO7P	3	0.69	-	10724.4	18819.5	3792.14	66895	44385.9	26389.2	1.18668	0.0831313	0.224915	0.242144	-2.04606	down	C04230	ko00564
MW0156640	Ser-Arg-Glu-Val-Ser	Ser-Arg-Glu-Val-Ser	Amino acids and derivatives	氨基酸及其衍生物	Amino acids and derivatives	氨基酸及其衍生物	C22H40N8O10	3	0.6895	-	60812	44925.3	55585.1	23590.9	29501.2	9306.68	1.18667	0.0139196	0.108164	2.58535	1.37036	up	-	-
MW0153965	Morphine Modulating Peptide,C-Terminal Fragment	Morphine Modulating Peptide,C-Terminal Fragment	Benzene and substituted derivatives	苯及其衍生物	Benzene and substituted derivatives	苯及其衍生物	C25H39N9O5	3	0.6891	-	891.24	859	671.79	4252.61	3747.76	4665.8	1.43169	0.00392411	0.0721587	0.19122	-2.38669	down	-	-
MW0129356	{5-[8-(5,7-dihydroxy-4-oxo-2-phenyl-3,4-dihydro-2H-1-benzopyran-3-yl)-5,7-dihydroxy-4-oxo-3,4-dihydro-2H-1-benzopyran-2-yl]-2-hydroxyphenyl}oxidanesulfonic acid	{5-[8-(5，7-二羟基-4-氧代-2-苯基-3，4-二氢-2H-1-苯并吡喃-3-基)-5，7-二羟基-4-氧代-3，4-二氢-2H-1-苯并吡喃-2-基]-2-羟基苯基}氧代磺酸	Organic acids	有机酸	Organic acids	有机酸	C30H22O13S	3	0.6871	-	5819.72	4999.96	8510.11	1933.58	530.29	2480.52	1.20663	0.0269226	0.137857	3.90944	1.96696	up	-	-
MW0152468	Leu-Pro-Glu-Phe-Tyr	Leu-Pro-Glu-Phe-Tyr	Amino acids and derivatives	氨基酸及其衍生物	Amino acids and derivatives	氨基酸及其衍生物	C34H45N5O9	3	0.6861	-	6573.91	5280.43	3679.62	31651.3	34006.2	33576.7	1.42177	1.75198e-05	0.0180449	0.156539	-2.67541	down	-	-
MW0167003	(3R, 7S)-12-oxojasmonoyl-isoleucine	(3R, 7S)-12-oxojasmonoyl-isoleucine	Organic acids	有机酸	Organic acids	有机酸	C18H26NO5-	3	0.6859	-	1414.9	2048.01	1762.16	9412.08	5310.64	10055.8	1.38124	0.0463642	0.171009	0.210871	-2.24557	down	-	-
MW0158697	TyrMe-Abu-OH	TyrMe-Abu-OH	Amino acids and derivatives	氨基酸及其衍生物	Amino acids and derivatives	氨基酸及其衍生物	C20H22N2O7	3	0.6849	-	119.04	299.75	654.48	908.87	1500.62	526.81	1.00655	0.147419	0.304689	0.365518	-1.45199	down	-	-
MW0153118	Lys-Pro-Met	L-赖氨酸-L-脯氨酸-L-蛋氨酸	Amino acids and derivatives	氨基酸及其衍生物	Amino acids and derivatives	氨基酸及其衍生物	C16H30N4O4S1	3	0.6834	-	170067	129121	91356	262492	308330	258839	1.305	0.00837381	0.0877044	0.470728	-1.08703	down	-	-
MW0145339	Arg-Glu-Ala-Phe-Arg	Arg-Glu-Ala-Phe-Arg	Amino acids and derivatives	氨基酸及其衍生物	Amino acids and derivatives	氨基酸及其衍生物	C29H47N11O8	3	0.6815	-	12002.9	18061.1	16288.1	56563.8	56835.2	41332.6	1.39242	0.0121411	0.103105	0.299565	-1.73906	down	-	-
MW0148216	Deinoxanthin	去甲黄黄素	Others	其它类	Ketone compounds	酮类化合物	C40H54O3	3	0.6814	-	8101.21	7998.74	11530.1	37619.3	38400.3	53142.8	1.40928	0.0174743	0.117338	0.213917	-2.22488	down	-	-
MW0149969	Glu-Gln-Asn	古氨酸-谷酰胺-天门冬酰氨	Amino acids and derivatives	氨基酸及其衍生物	Amino acids and derivatives	氨基酸及其衍生物	C14H23N5O8	3	0.6806	-	72151.1	94511.9	103516	32235.8	32352.6	33986.6	1.41089	0.0251979	0.135322	2.74084	1.45462	up	-	-
MW0157791	Thr-Pro-Trp	苏氨酸-脯氨酸-色氨酸	Amino acids and derivatives	氨基酸及其衍生物	Amino acids and derivatives	氨基酸及其衍生物	C20H26N4O5	3	0.6794	-	4102.5	4687.11	4678.11	28360.8	15862	28420.2	1.40178	0.0417572	0.162231	0.185396	-2.43132	down	-	-
MW0159246	Val-Val-Trp	缬氨酸-缬氨酸-色氨酸	Amino acids and derivatives	氨基酸及其衍生物	Amino acids and derivatives	氨基酸及其衍生物	C21H30N4O4	3	0.6791	-	17235.6	33050.3	14318.8	7517.88	9140.32	8539.78	1.23619	0.1517	0.310768	2.56388	1.35833	up	-	-
MW0146246	Asp-Pro-Thr-Ile-Glu	Asp-Pro-Thr-Ile-Glu	Amino acids and derivatives	氨基酸及其衍生物	Amino acids and derivatives	氨基酸及其衍生物	C24H39N5O11	3	0.677	-	6902.1	3230.28	4024.47	2096.76	3314.3	844.74	1.01233	0.129883	0.284242	2.263	1.17823	up	-	-
MW0149669	Gln-Gln-Ile	谷酰氨-谷酰氨-异亮氨酸	Amino acids and derivatives	氨基酸及其衍生物	Amino acids and derivatives	氨基酸及其衍生物	C16H29N5O6	3	0.6768	-	14130.2	16019.6	16466.1	4171.95	3283.37	4431.38	1.4273	0.000852775	0.0527544	3.92169	1.97147	up	-	-
MW0148855	Ecdysone palmitate	棕榈酸蜕皮激素	Lipids	脂质	Free fatty acids	游离脂肪酸	C43H74O7	3	0.6767	-	10277.2	15873.1	8287.79	5247.31	7627.71	4240.43	1.15358	0.110375	0.26304	2.01211	1.00871	up	C02681	-
MEDP1335	LysoPC(20:5(5Z,8Z,11Z,14Z,17Z))	LPC(20:5/0:0)	Lipids	脂质	LPC	溶血磷脂酰胆碱	C28H48NO7P	3	0.6761	-	137422	160715	157281	401170	432183	427166	1.43406	4.24787e-05	0.0180449	0.361294	-1.46876	down	C04230	ko00564
MW0158677	Tyr-Val-Tyr-Lys-Val	Tyr-Val-Tyr-Lys-Val	Amino acids and derivatives	氨基酸及其衍生物	Amino acids and derivatives	氨基酸及其衍生物	C34H50N6O8	3	0.6758	-	24795.7	36360.4	5756.43	5028.32	6125.06	3228.2	1.06445	0.187684	0.346764	4.65266	2.21806	up	-	-
ZINC103541531	Kansuiphorin C	[（1S，4S，5R，6R，9S，10R，12R，14R)-4-乙酰氧基-5-羟基-3，7，11，11，14-五甲基-15-氧代-6-四环[7.5.1.01，5.01，12]十五-2，7-二烯基]苯甲酸酯	Benzene and substituted derivatives	苯及其衍生物	Benzene and substituted derivatives	苯及其衍生物	C29H34O6	3	0.6757	-	7063.61	8699.03	4260.8	13962.1	16324.2	19430	1.29962	0.00926251	0.0918335	0.402754	-1.31203	down	-	-
MW0006449	Butyl 4-aminobenzoate	4-氨基苯甲酸丁酯	Benzene and substituted derivatives	苯及其衍生物	Benzene and substituted derivatives	苯及其衍生物	C11H15NO2	3	0.6747	-	2154.69	5086.82	4455.42	17953.7	30868.8	5325.69	1.09447	0.193429	0.353909	0.216017	-2.21078	down	C07875	-
MW0156703	Ser-Gln-Asp-Glu	Ser-Gln-Asp-Glu	Amino acids and derivatives	氨基酸及其衍生物	Amino acids and derivatives	氨基酸及其衍生物	C17H27N5O11	3	0.6731	-	44017.3	65006.7	57179.3	148010	160481	157053	1.40682	0.000481075	0.0506524	0.357009	-1.48597	down	-	-
MW0158916	Val-Asn-His-Val-Thr	Val-Asn-His-Val-Thr	Amino acids and derivatives	氨基酸及其衍生物	Amino acids and derivatives	氨基酸及其衍生物	C24H40N8O8	3	0.6726	-	2796.49	4923.17	3089.47	6409.39	10564.2	6410.92	1.22667	0.075433	0.212901	0.462234	-1.1133	down	-	-
MW0106599	epi-Tumonoic acid D	epi-Tumonoic acid D	Organic acids	有机酸	Organic acids	有机酸	C16H29NO3	3	0.6726	-	50545.4	84454	72041.4	113186	174527	190907	1.27443	0.0461335	0.170701	0.432579	-1.20896	down	-	-
MEDP0825	N-Cyclohexylformamide	N-环己基甲酰胺	Alkaloids	生物碱	Alkaloids	生物碱	C7H13NO	3	0.6718	-	10863.7	15491.5	12501.4	59194.2	57971	51367.3	1.42618	0.00045439	0.0506524	0.230558	-2.1168	down	C11519	-
MW0152218	Leu-Arg-Asp-Leu-Tyr	Leu-Arg-Asp-Leu-Tyr	Amino acids and derivatives	氨基酸及其衍生物	Amino acids and derivatives	氨基酸及其衍生物	C31H50N8O9	3	0.6716	-	60093.6	50453.1	50888.3	186964	164028	146712	1.42463	0.00728194	0.0832757	0.32436	-1.62433	down	-	-
MW0145967	Asn-Arg-Cys-Ser-Gln-Gly-Ser-Cys-Trp-Asn(Disulfide Bridge 3-8)	Asn-Arg-Cys-Ser-Gln-Gly-Ser-Cys-Trp-Asn(Disulfide Bridge 3-8)	Amino acids and derivatives	氨基酸及其衍生物	Amino acids and derivatives	氨基酸及其衍生物	C44H65N17O16S2	3	0.6714	-	32508.4	31391.8	25662.9	2906.74	9652.53	7276.43	1.30972	0.00133904	0.0554745	4.51525	2.17481	up	-	-
MW0144606	Ala-His-Val-Asp	Ala-His-Val-Asp	Amino acids and derivatives	氨基酸及其衍生物	Amino acids and derivatives	氨基酸及其衍生物	C18H28N6O7	3	0.6711	-	60207.4	30532.9	41156.8	15462.3	23741	20480.6	1.23214	0.100011	0.249088	2.20992	1.144	up	-	-
MW0150444	Gly-Phe-Asn	甘氨酸-苯丙氨酸-天门冬酰氨	Amino acids and derivatives	氨基酸及其衍生物	Amino acids and derivatives	氨基酸及其衍生物	C15H20N4O5	3	0.6693	-	10511.6	30655.2	33451.8	4712.19	5195.85	2889.06	1.29671	0.102747	0.252718	5.83091	2.54372	up	-	-
MW0136912	7-{[3,4-dihydroxy-6-(hydroxymethyl)-5-{[3,4,5-trihydroxy-6-(hydroxymethyl)oxan-2-yl]oxy}oxan-2-yl]oxy}-5-hydroxy-2-(4-hydroxyphenyl)-3-{[3,4,5-trihydroxy-6-(hydroxymethyl)oxan-2-yl]oxy}-4H-chromen-4-one	7-{[3,4-二羟基-6-(羟甲基)-5-{[3,4,5-三羟基-6-(羟甲基）氧代-2-基]氧基}-5-羟基-2-(4-羟基苯基)-3-{[3,4,5-三羟基-6-(羟甲基）氧代-2-基]氧基]-4H-铬-4-酮	Others	其它类	Ketone compounds	酮类化合物	C33H40O21	3	0.6679	-	98539.5	22024.1	11163.6	209140	139764	190233	1.17509	0.0194427	0.123571	0.24433	-2.0331	down	-	-
MEDP1407	Carnitine C14:2	肉碱 C14:2	FA	脂肪酰类	CAR	酰基肉碱	C21H37NO4	3	0.6675	-	11367.8	15915.8	8928.44	38039.1	36620.7	34945.1	1.38528	0.00244322	0.0669726	0.330387	-1.59777	down	-	-
MW0143724	6-(3,3-Dimethylallyl)galangin	6-(3，3-DMA）高良姜素；6-(3，3-二甲基烯丙基）高良姜素	Flavonoids	黄酮	Flavones	黄酮	C20H18O5	3	0.6663	-	9738.78	8323.14	12276.8	30938.7	30609	39032.6	1.40411	0.00636563	0.0818674	0.301636	-1.72912	down	-	-
MW0156972	Ser-Val-Gln	丝氨酰-缬氨酰-谷氨酰胺	Amino acids and derivatives	氨基酸及其衍生物	Amino acids and derivatives	氨基酸及其衍生物	C13H24N4O6	3	0.6662	-	13363.5	22493.3	22832.3	7095.63	4714.61	8008.36	1.32257	0.0424054	0.163831	2.96131	1.56624	up	-	-
Zmhn001358	4-O-Glucosyl-4-hydroxybenzoic acid	4-O-葡萄糖基-4-羟基苯甲酸	Phenolic acids	酚酸类	Phenolic acids	酚酸类	C13H16O8	3	0.6654	-	103206	82905.2	93391	43548.2	32001.3	15580.9	1.28225	0.00449237	0.0743943	3.06705	1.61685	up	-	-
MW0151467	Ile-Ile-Asp	L-异亮氨酸-L-异亮氨酸-L-天冬氨酸	Amino acids and derivatives	氨基酸及其衍生物	Amino acids and derivatives	氨基酸及其衍生物	C16H29N3O6	3	0.6652	-	50785.7	61082.7	66966.8	182943	162632	221830	1.41009	0.0127624	0.104116	0.315181	-1.66575	down	-	-
ZINC95919260	(2R)-2-hydroxy-N-[(2S,3S,4R)-1,3,4-trihydroxyoctadecan-2-yl]pentadecanamide	（2R)-2-羟基-N-[（2S，3S，4R)-1，3，4-三羟基十八烷-2-基]十五酰胺	Alcohol and amines	醇、胺类	Amines	胺类	C33H67NO5	3	0.6651	-	4208.11	2006.48	2815.34	12303.7	19602.5	33265.3	1.35427	0.0914068	0.237321	0.138556	-2.85146	down	-	-
MW0127639	({1-[6-(5,7-dihydroxy-4-oxo-3,4-dihydro-2H-1-benzopyran-2-yl)-7-hydroxy-2-methyl-2H-chromen-2-yl]-4-methylpent-3-en-1-yl}oxy)sulfonic acid	（{1-[6-(5，7-二羟基-4-氧代-3，4-二氢-2H-1-苯并吡喃-2-基)-7-羟基-2-甲基-2H-苯并吡喃-2-基]-4-甲基戊-3-烯-1-基}氧基）磺酸	Organic acids	有机酸	Organic acids	有机酸	C25H26O10S	3	0.6643	-	2742.31	16240.1	3394.04	2522.29	1634.94	837.68	1.00485	0.317678	0.471537	4.47984	2.16345	up	-	-
MW0158719	Tyr-Nap-OH	Tyr-Nap-OH	Amino acids and derivatives	氨基酸及其衍生物	Amino acids and derivatives	氨基酸及其衍生物	C28H24N2O7	3	0.6639	-	8254	17671.7	10761.7	26357.1	28755	148919	1.10063	0.301721	0.456616	0.179813	-2.47543	down	-	-
MW0146187	Asp-Lys-Ile	L-天冬氨酰-L-赖氨酰-L-异亮氨酸	Amino acids and derivatives	氨基酸及其衍生物	Amino acids and derivatives	氨基酸及其衍生物	C16H30N4O6	3	0.6625	-	141039	113497	74387.6	305713	264853	297472	1.35075	0.00270031	0.0669726	0.378927	-1.40001	down	-	-
MW0163480	(1R)-1-[[(2S,3R,11bS)-3-ethyl-9,10-dimethoxy-1,2,3,4,5,6,7,11b-octahydrobenzo[a]quinolizin-5-ium-2-yl]methyl]-7-methoxy-1,2,3,4-tetrahydroisoquinolin-2-ium-6-ol	(1R)-1-[[(2S,3R,11bS)-3-ethyl-9,10-dimethoxy-1,2,3,4,5,6,7,11b-octahydrobenzo[a]quinolizin-5-ium-2-yl]methyl]-7-methoxy-1,2,3,4-tetrahydroisoquinolin-2-ium-6-ol	Benzene and substituted derivatives	苯及其衍生物	Benzene and substituted derivatives	苯及其衍生物	C28H40N2O4+2	3	0.6622	-	337.17	1252.35	1284.61	4356.95	4591.66	3084.98	1.24307	0.00825491	0.0877044	0.238842	-2.06587	down	-	-
MW0157867	Thr-Val-Met	苏氨酸-缬氨酸-甲硫氨酸	Amino acids and derivatives	氨基酸及其衍生物	Amino acids and derivatives	氨基酸及其衍生物	C14H27N3O5S1	3	0.6614	-	37776.2	49083.2	50079.8	112920	94299.4	171978	1.33734	0.0709422	0.207548	0.361129	-1.46941	down	-	-
MW0159228	Val-Tyr-Thr	缬氨酸-酪氨酸-苏氨酸	Amino acids and derivatives	氨基酸及其衍生物	Amino acids and derivatives	氨基酸及其衍生物	C18H27N3O6	3	0.6611	-	14344.4	31298.2	27812.5	75154.9	59423.3	82232.4	1.30636	0.00595251	0.0805574	0.338799	-1.5615	down	-	-
MW0005861	Benzanthrone	苯甲酮	Alkaloids	生物碱	Alkaloids	生物碱	C17H10O	3	0.6608	-	338254	252254	277826	87255.3	26846.4	70767	1.3153	0.00279398	0.0669726	4.69703	2.23175	up	-	-
MW0132951	3-[5,7-dihydroxy-2-(4-hydroxy-3-methoxyphenyl)-4-oxo-3,4-dihydro-2H-1-benzopyran-8-yl]-5,7-dihydroxy-2-phenyl-3,4-dihydro-2H-1-benzopyran-4-one	3-[5，7-二羟基-2-(4-羟基-3-甲氧基苯基)-4-氧代-3，4-二氢-2H-1-苯并吡喃-8-基]-5，7-二羟基-2-苯基-3，4-二氢-2H-1-苯并吡喃-4-酮	Benzene and substituted derivatives	苯及其衍生物	Benzene and substituted derivatives	苯及其衍生物	C31H24O10	3	0.6603	-	43859.9	31933.7	24232.2	3276.93	13131.3	20971	1.03378	0.0534907	0.181451	2.67598	1.42006	up	-	-
MW0157868	Thr-Val-Met-Trp-Asp	Thr-Val-Met-Trp-Asp	Amino acids and derivatives	氨基酸及其衍生物	Amino acids and derivatives	氨基酸及其衍生物	C29H42N6O9S	3	0.6601	-	1.52141e+06	1.07798e+06	1.13861e+06	622075	513532	522930	1.37842	0.0315761	0.146513	2.25379	1.17236	up	-	-
MW0151378	Ile-Asp-Val	L-异亮氨酸-L-天冬氨酸-L-缬氨酸	Amino acids and derivatives	氨基酸及其衍生物	Amino acids and derivatives	氨基酸及其衍生物	C15H27N3O6	3	0.6584	-	17544.4	22068.8	18830.1	2794.47	3000.12	798.37	1.35186	0.00142445	0.0574735	8.86451	3.14804	up	-	-
Hmln000873	2-O-Galloyl-D-glucose	2-O-没食子酰-D-葡萄糖	Phenolic acids	酚酸类	Phenolic acids	酚酸类	C13H16O10	3	0.6567	-	5437.03	4065.41	5457.38	1838.65	3075.2	2479.3	1.29254	0.0141062	0.108164	2.02347	1.01683	up	-	-
MW0121138	5-benzyl-5-(pyridin-3-yl)imidazolidine-2,4-dione	5-苄基-5-（吡啶-3-基）咪唑啉-2,4-二酮	Benzene and substituted derivatives	苯及其衍生物	Benzene and substituted derivatives	苯及其衍生物	C15H13N3O2	3	0.6565	-	238433	259290	289052	3.88032e+06	3.06343e+06	4.05797e+06	1.43753	0.00788071	0.0852366	0.0715138	-3.80563	down	-	-
MW0149414	GalNAca1-3[Fuca1-2]Galb1-4[Fuca1-3]GlcNAcb-Sp	GalNAca1-3[Fuca1-2]Galb1-4[Fuca1-3]GlcNAcb-Sp	Others	其它类	Saccharides	糖类	C36H61N5O24	3	0.6564	-	18749	16474.2	32347.3	11831.7	9048.02	7755.99	1.25406	0.112872	0.265816	2.35966	1.23858	up	-	-
MEDN1212	7alpha,12beta-Dihydroxy-5alpha-cholan-24-oic Acid	7α,12β-二羟基-5α-胆碱-24-酸	Tryptamines,Cholines,Pigments	色胺、胆碱、色素	Cholines	胆碱类	C24H40O4	3	0.6563	-	150021	78144.6	35123.3	186728	456205	484308	1.20056	0.0802269	0.220759	0.233569	-2.09808	down	-	-
MW0144704	Ala-Pro-Ala	L-丙氨酰-L-脯氨酰-L-丙氨酸	Amino acids and derivatives	氨基酸及其衍生物	Amino acids and derivatives	氨基酸及其衍生物	C11H19N3O4	3	0.6559	-	54574.4	49697.3	55402.6	179604	239184	226811	1.42945	0.0117271	0.102424	0.247327	-2.01551	down	-	-
MW0055603	PA(15:0/22:5(4Z,7Z,10Z,13Z,16Z))	PA(15:0/22:5(4Z,7Z,10Z,13Z,16Z))	GP	甘油磷脂类	PA	磷脂酸	C40H69O8P	3	0.6548	-	45878.3	30500.7	49308.1	3400.38	3473.63	3371.76	1.43315	0.0218444	0.128121	12.2672	3.61674	up	-	-
ZINC33831652	Hydroxy gamma-sanshool	（2E，4E，8Z，10E，12E)-N-(2-羟基丙-2-基）十四-2，4，8，10，12-五烯酰胺	FA	脂肪酰类	Others	其它	C17H25NO2	3	0.6546	-	43792.9	46172.2	31131.9	13681	11025.7	10873.6	1.4013	0.0224006	0.129344	3.40348	1.76701	up	-	-
MW0015222	9-((2R,3R,4S,5R)-3,4-Dihydroxy-5-(hydroxymethyl)tetrahydrofuran-2-yl)-7-methyl-2,6-dioxo-2,3,6,9-tetrahydro-1H-purin-7-ium	7-甲基黄嘌呤核苷	Nucleotides and derivatives	核苷酸及其衍生物	Nucleotides and derivatives	核苷酸及其衍生物	C11H15N4O6+	3	0.6542	-	29698.4	35222.1	34107.5	13200.7	18932	11157.4	1.34571	0.00403268	0.0722456	2.28755	1.1938	up	C16352	ko00232,ko01100,ko01110
MW0146162	Asp-Ile-Val	L-天冬氨酰-L-异亮氨酰-L-缬氨酸	Amino acids and derivatives	氨基酸及其衍生物	Amino acids and derivatives	氨基酸及其衍生物	C15H27N3O6	3	0.6535	-	9609.92	9992.53	13692.5	231070	233683	257780	1.43746	0.00109393	0.0554745	0.046081	-4.43968	down	-	-
MW0150110	Glu-Phe-Ser-Glu	谷氨酸-苯丙氨酸-丝氨酸-谷氨酸	Amino acids and derivatives	氨基酸及其衍生物	Amino acids and derivatives	氨基酸及其衍生物	C22H30N4O10	3	0.6533	-	1298.81	822.45	396.22	2922.19	1127.37	6811.61	1.05456	0.237342	0.395427	0.231787	-2.10913	down	-	-
MW0013781	3,4,5-trihydroxy-6-{[(3E)-2-oxo-4-phenylbut-3-en-1-yl]oxy}oxane-2-carboxylic acid	3，4，5-三羟基-6-{[（3E)-2-氧代-4-苯基丁-3-烯-1-基]氧}氧杂环己烷-2-羧酸	Organic acids	有机酸	Organic acids	有机酸	C16H18O8	3	0.6529	-	27214.7	37626.9	23061.6	80517.8	90424.2	139010	1.36403	0.0480774	0.173558	0.283602	-1.81806	down	-	-
MW0110174	Tumonoic acid A	Tumonoic acid A	Organic acids	有机酸	Organic acids	有机酸	C19H33NO4	3	0.6523	-	28803.7	37471.4	25774.4	154362	173252	183378	1.42974	0.00116503	0.0554745	0.180138	-2.47282	down	-	-
MW0011073	(2R,3R,4S,5S,6R)-2-octoxy-6-[[(2S,3R,4S,5R)-3,4,5-trihydroxyoxan-2-yl]oxymethyl]oxane-3,4,5-triol	(2R,3R,4S,5S,6R)-2-octoxy-6-[[(2S,3R,4S,5R)-3,4,5-trihydroxyoxan-2-yl]oxymethyl]oxane-3,4, 5-三醇	Alcohol and amines	醇、胺类	Alcohols	醇类	C19H36O10	3	0.6522	-	778.39	1716.45	1005.48	3428.17	4087.48	5372.77	1.34146	0.0171521	0.116183	0.271586	-1.88052	down	-	-
MW0144506	Ala-Asn-Val-Asp	Ala-Asn-Val-Asp	Amino acids and derivatives	氨基酸及其衍生物	Amino acids and derivatives	氨基酸及其衍生物	C16H27N5O8	3	0.6505	-	21630.5	24947.3	20237	61699.3	58158.9	57947.4	1.4312	4.27788e-05	0.0180449	0.375775	-1.41206	down	-	-
MW0145350	Arg-Glu-Lys-Asp-Lys	Arg-Glu-Lys-Asp-Lys	Amino acids and derivatives	氨基酸及其衍生物	Amino acids and derivatives	氨基酸及其衍生物	C27H50N10O10	3	0.6487	-	51531.7	38354.6	32450.2	11024.9	12420.9	8943	1.39695	0.0303116	0.145295	3.77713	1.91729	up	-	-
MW0149952	Glu-Asp-Thr	谷氨酸-天门冬氨酸-苏氨酸	Amino acids and derivatives	氨基酸及其衍生物	Amino acids and derivatives	氨基酸及其衍生物	C13H21N3O9	3	0.6481	-	14632.3	24831.9	32942.8	46990	40036.3	58555.2	1.17143	0.0321686	0.147492	0.497364	-1.00763	down	-	-
MW0141201	1-[2-Hydroxy-3-(4-phenoxyphenoxy)propyl]-3-(2-methylpropanoyl)-1H-indole-5-carboxylic acid	1-[2-羟基-3-(4-苯氧基苯氧基)丙基]-3-(2-甲基丙酰基)-1H-吲哚-5-羧酸	Benzene and substituted derivatives	苯及其衍生物	Benzene and substituted derivatives	苯及其衍生物	C28H27NO6	3	0.6479	-	8134.74	3117.56	4373.5	12304.3	14322.6	8520.51	1.16201	0.046546	0.171232	0.44458	-1.16949	down	-	-
MW0132768	[2-methoxy-4-(3,5,6-trihydroxy-7-sulinooxy-3,4-dihydro-2H-chromen-2-yl)phenyl] hydrogen sulate	3，6-二羟基-2-[3-甲氧基-4-(磺酰氧基）苯基]-7-(磺酰氧基)-3，4-二氢-2H-1-苯并吡喃-5-醇盐	Benzene and substituted derivatives	苯及其衍生物	Benzene and substituted derivatives	苯及其衍生物	C16H16O12S2	3	0.6477	-	5614.2	5382.94	4935.41	9880.45	17216.5	13251	1.35737	0.0604468	0.189887	0.394879	-1.34052	down	-	-
MW0152563	Leu-Val-Leu-Arg-Leu	Leu-Val-Leu-Arg-Leu	Amino acids and derivatives	氨基酸及其衍生物	Amino acids and derivatives	氨基酸及其衍生物	C29H56N8O6	3	0.6466	-	614.38	681.98	815.91	1625.38	1113.74	2043.47	1.29175	0.074112	0.211917	0.441658	-1.179	down	-	-
MW0128729	[4-({[5,7-dihydroxy-2-(3,4,5-trihydroxyphenyl)-3,4-dihydro-2H-1-benzopyran-3-yl]oxy}carbonyl)-2,6-dihydroxyphenyl]oxidanesulfonic acid	[4-({[5,7-二羟基-2-(3,4,5-三羟基苯基)-3,4-二氢-2H-1-苯并吡喃-3-基]氧基}羰基)-2,6-二羟苯基]氧化磺酸	Organic acids	有机酸	Organic acids	有机酸	C22H18O14S	3	0.6456	-	19631.9	13014.7	14466.6	4995.59	6082.48	9672.5	1.26274	0.027777	0.139926	2.27045	1.18298	up	-	-
MW0108623	L-Asparagine, N-[2-(acetylamino)-2-deoxy-beta-D-glucopyranosyl]-	L-天冬酰胺，N-[2-(乙酰氨基)-2-脱氧-β-D-吡喃葡萄糖基]-	Amino acids and derivatives	氨基酸及其衍生物	Amino acids and derivatives	氨基酸及其衍生物	C12H21N3O8	3	0.645	-	5008.03	8958.73	4972.44	50376.8	49468.1	46196.4	1.41859	2.10737e-05	0.0180449	0.129684	-2.94693	down	-	-
MW0144701	Ala-Phe-Tyr	L-丙氨酰-L-苯丙氨酰-L-酪氨酸	Amino acids and derivatives	氨基酸及其衍生物	Amino acids and derivatives	氨基酸及其衍生物	C21H25N3O5	3	0.6432	-	24489.5	25905.9	26553	76143.4	99385.9	91131.9	1.42999	0.0108961	0.0985531	0.288562	-1.79304	down	-	-
MW0158515	Tyr-Leu-Gln	酪氨酸-亮氨酸-谷氨酰胺	Amino acids and derivatives	氨基酸及其衍生物	Amino acids and derivatives	氨基酸及其衍生物	C20H30N4O6	3	0.6427	-	144140	195618	201564	470853	440467	631528	1.38242	0.0222832	0.129344	0.35086	-1.51103	down	-	-
MW0126122	4-[(5-Methyl-1h-Pyrazol-3-Yl)amino]-2-Phenylphthalazin-1(2h)-One	4-[(5-Methyl-1h-Pyrazol-3-Yl)amino]-2-Phenylphthalazin-1(2h)-One	Others	其它类	Ketone compounds	酮类化合物	C18H15N5O	3	0.6422	-	10256	12923.9	20251.7	62263.2	50943.6	70832.4	1.37818	0.00544732	0.0790937	0.235991	-2.0832	down	-	-
MW0153055	Lys-Lys-Gln	L-赖氨酸-L-赖氨酸-L-谷氨酰胺	Amino acids and derivatives	氨基酸及其衍生物	Amino acids and derivatives	氨基酸及其衍生物	C17H34N6O5	3	0.6418	-	1478.34	1193.62	1739.57	20698.3	30734.4	34498.8	1.4304	0.022078	0.128498	0.0513378	-4.28384	down	-	-
MW0055901	PA(20:0/22:6(4Z,7Z,10Z,13Z,16Z,19Z))	PA(20:0/22:6(4Z,7Z,10Z,13Z,16Z,19Z))	GP	甘油磷脂类	PA	磷脂酸	C45H77O8P	3	0.6415	-	102268	103953	105491	139919	213442	279617	1.23678	0.117378	0.270558	0.492453	-1.02194	down	-	-
MW0112109	2-Decarboxybetanin	2-脱羧甜菜碱	Others	其它类	Others	其它	C23H27N2O11	3	0.6414	-	15486	14171.2	16461.4	4606.32	4796.56	4943.31	1.43838	0.0033249	0.0680309	3.21469	1.68468	up	-	-
MW0156787	Ser-Ile-Ala	丝氨酰-异亮氨酰-丙氨酸	Amino acids and derivatives	氨基酸及其衍生物	Amino acids and derivatives	氨基酸及其衍生物	C12H23N3O5	3	0.6412	-	36467.6	34326.1	29221	69419.6	72398.9	78374.9	1.41976	0.00036911	0.0456788	0.454213	-1.13856	down	-	-
Zmpn004068	Phloretin-2'-O-(6''-O-xylosyl)glucoside	根皮素-2'-O-(6''-O-木糖基)葡萄糖苷	Flavonoids	黄酮	Chalcones	查耳酮	C26H32O14	3	0.641	-	11351.4	11536.4	11786.6	3033.01	3621.45	480.99	1.19272	0.00988437	0.0946556	4.85946	2.2808	up	-	-
MW0146153	Asp-Ile-Met	L-天冬氨酰-L-异亮氨酰-L-蛋氨酸	Amino acids and derivatives	氨基酸及其衍生物	Amino acids and derivatives	氨基酸及其衍生物	C15H27N3O6S1	3	0.6405	-	47704.9	38997.7	49883.9	17046.3	7840.08	4649.4	1.31179	0.00211442	0.0645453	4.62445	2.20928	up	-	-
MW0152516	Leu-Thr-Phe-Gln-Met	Leu-Thr-Phe-Gln-Met	Amino acids and derivatives	氨基酸及其衍生物	Amino acids and derivatives	氨基酸及其衍生物	C29H46N6O8S	3	0.6399	-	3107.76	7113.93	8490.8	16963.8	21341.1	17081.6	1.26125	0.00502191	0.0781934	0.337853	-1.56553	down	-	-
MW0056792	PC(14:0/18:4(6Z,9Z,12Z,15Z))	PC(14:0/18:4(6Z,9Z,12Z,15Z))	GP	甘油磷脂类	PC	磷脂酰胆碱	C40H72NO8P	3	0.6392	-	103002	60479.6	47483.6	253076	222368	94309.1	1.12921	0.121294	0.275202	0.370274	-1.43333	down	-	-
MW0105632	Antanapeptin A	安他肽A	Benzene and substituted derivatives	苯及其衍生物	Benzene and substituted derivatives	苯及其衍生物	C41H60N4O8	3	0.6388	-	1474.99	12508.2	1348.67	47100	47510.6	151493	1.28311	0.155708	0.315667	0.0622983	-4.00466	down	-	-
MW0159110	Val-Met-Met-Val-Arg	Val-Met-Met-Val-Arg	Amino acids and derivatives	氨基酸及其衍生物	Amino acids and derivatives	氨基酸及其衍生物	C26H50N8O6S2	3	0.6388	-	74509.2	50949.3	42399.9	22638.6	15483.2	18762.5	1.3488	0.0555024	0.183778	2.95087	1.56114	up	-	-
MW0152453	Leu-Phe-Lys-Lys	Leu-Phe-Lys-Lys	Amino acids and derivatives	氨基酸及其衍生物	Amino acids and derivatives	氨基酸及其衍生物	C27H46N6O5	3	0.6379	-	29198.3	27831.7	21851.9	86592.9	87283.6	75105.6	1.42247	0.000832754	0.0522159	0.316817	-1.65828	down	-	-
MW0158060	L-trihomomethionine	L-三高甲硫氨酸	Amino acids and derivatives	氨基酸及其衍生物	Amino acids and derivatives	氨基酸及其衍生物	C8H17NO2S	3	0.6371	-	4445.7	6260.54	8146.27	14817.3	16588.7	16456.7	1.34787	0.0038453	0.0719443	0.393887	-1.34414	down	C17221	ko00966,ko01210
MW0164180	sn-3-O-(geranylgeranyl)glycerol 1-phosphate(2-)	sn-3-O-(香叶基香叶基)甘油1-磷酸(2-)	Organic acids	有机酸	Organic acids	有机酸	C23H39O6P-2	3	0.6351	-	25054.5	22712.7	22574.6	61234.3	79424.1	66513.6	1.42612	0.0123166	0.103343	0.339533	-1.55837	down	-	-
MW0155308	Phe-Phe-Tyr	苯丙氨酰-苯丙氨酰-酪氨酸	Amino acids and derivatives	氨基酸及其衍生物	Amino acids and derivatives	氨基酸及其衍生物	C27H29N3O5	3	0.635	-	12607.4	17397.9	16053.8	39046.4	41870	33054.1	1.3942	0.00413269	0.0725502	0.404131	-1.3071	down	-	-
MW0157612	Thr-Gln-Leu	苏氨酸-谷氨酰胺-亮氨酸	Amino acids and derivatives	氨基酸及其衍生物	Amino acids and derivatives	氨基酸及其衍生物	C15H28N4O6	3	0.6343	-	15157.9	7437.1	5931.26	63623.8	29984.8	38453.1	1.3138	0.0665523	0.201016	0.216007	-2.21085	down	-	-
MW0157636	Thr-Glu-Met	苏氨酰-谷氨酰-甲硫氨酸	Amino acids and derivatives	氨基酸及其衍生物	Amino acids and derivatives	氨基酸及其衍生物	C14H25N3O7S1	3	0.6343	-	7259.5	4193.82	4410.27	3824.43	1834.43	1450.66	1.13053	0.0822142	0.223607	2.23132	1.1579	up	-	-
MW0136456	6-{4-[3-(3,7-dimethylocta-2,6-dien-1-yl)-5,7-dihydroxy-6-(4-hydroxy-3-methylbut-2-en-1-yl)-4-oxo-3,4-dihydro-2H-1-benzopyran-2-yl]-3-hydroxyphenoxy}-3,4,5-trihydroxyoxane-2-carboxylic acid	6-{2-[3-(3，7-二甲基辛-2，6-二烯-1-基)-5，7-二羟基-6-(4-羟基-3-甲基丁-2-烯-1-基)-4-氧代-3，4-二氢-2H-1-苯并吡喃-2-基]-5-羟基苯氧基}-3，4，5-三羟基恶烷-2-羧酸	Organic acids	有机酸	Organic acids	有机酸	C36H44O13	3	0.6325	-	190.53	1043.58	1220.39	3090.58	7449.68	7518.11	1.23051	0.0649476	0.198392	0.13592	-2.87917	down	-	-
MW0158612	Tyr-Ser-Tyr	酪氨酸-丝氨酸-酪氨酸	Amino acids and derivatives	氨基酸及其衍生物	Amino acids and derivatives	氨基酸及其衍生物	C21H25N3O7	3	0.6318	-	732.61	76.14	129.61	3787.26	9572.35	1314.15	1.23379	0.201462	0.361776	0.0639482	-3.96695	down	-	-
MW0128476	[(5-{[2-(3,4-dihydroxyphenyl)-5,7-dihydroxy-4-oxo-4H-chromen-3-yl]oxy}-3,4-dihydroxyoxolan-2-yl)methoxy]sulfonic acid	[（5-{[2-(3，4-二羟基苯基)-5，7-二羟基-4-氧代-4H-苯并吡喃-3-基]氧}-3，4-二羟基氧杂环戊烷-2-基）甲氧基]磺酸	Organic acids	有机酸	Organic acids	有机酸	C20H18O14S	3	0.6318	-	1733.7	3003.73	1783.33	129.38	636.39	112.08	1.28527	0.0312388	0.146498	7.4281	2.89299	up	-	-
MW0155379	Phe-Tyr-Gln	苯丙氨酰-酪氨酰-谷氨酰胺	Amino acids and derivatives	氨基酸及其衍生物	Amino acids and derivatives	氨基酸及其衍生物	C23H28N4O6	3	0.6315	-	38512.6	29643.8	33791.5	12689.1	12170.4	22328.4	1.2784	0.0136919	0.107496	2.16047	1.11135	up	-	-
MW0156948	Ser-Tyr-Asn	L-丝氨酰-L-酪氨酰-L-天冬酰胺	Amino acids and derivatives	氨基酸及其衍生物	Amino acids and derivatives	氨基酸及其衍生物	C16H22N4O7	3	0.6311	-	121290	125422	152899	410944	253159	429046	1.34914	0.0498152	0.176042	0.36556	-1.45182	down	-	-
MW0168269	Podocarpa-8,11,13-trien-16-oic acid, 12-hydroxy-	罗汉松酸	Terpenoids	萜类	Ditepenoids	二萜	C17H22O3	3	0.6309	-	26752	45332.1	7191.31	72699	92374.9	133439	1.16475	0.0341189	0.150826	0.265568	-1.91285	down	-	-
MW0006109	Azelnidipine	阿塞尼地平	Benzene and substituted derivatives	苯及其衍生物	Benzene and substituted derivatives	苯及其衍生物	C33H34N4O6	3	0.6305	-	44022.4	68912.6	33666.8	17817.7	16629.2	10062	1.30359	0.0760772	0.213679	3.29376	1.71974	up	-	-
MW0152482	Leu-Ser-Asp	L-亮氨酸-L-丝氨酸-L-天冬氨酸	Amino acids and derivatives	氨基酸及其衍生物	Amino acids and derivatives	氨基酸及其衍生物	C13H23N3O7	3	0.6298	-	375.12	702.43	398	3387	7081.8	7649.64	1.39646	0.0525962	0.179975	0.0814391	-3.61813	down	-	-
ZINC95909321	5-hydroxy-2-(4-methoxyphenyl)-8,8-dimethyl-3-[(2S,3R,4R,5R,6S)-3,4,5-trihydroxy-6-methyloxan-2-yl]oxypyrano[2,3-h]chromen-4-one	5-羟基-2-(4-甲氧基苯基)-8，8-二甲基-3-[（2S，3R，4R，5R，6S)-3，4，5-三羟基-6-甲氧基-2-基]氧吡喃并[2，3-h]苯并吡喃-4-酮	Others	其它类	Ketone compounds	酮类化合物	C27H28O10	3	0.6295	-	4224.77	3900.25	33970.3	603.92	603.52	464.99	1.28183	0.309097	0.463546	25.1702	4.65364	up	-	-
MW0062301	PS(14:0/18:3(6Z,9Z,12Z))	PS(14:0/18:3(6Z,9Z,12Z))	GP	甘油磷脂类	PS	磷脂酰丝氨酸	C38H68NO10P	3	0.6279	-	37303.1	44352.5	31000.9	8315	19478.4	10216.6	1.29624	0.00885397	0.0898959	2.96386	1.56748	up	-	-
MW0123681	Dihydrorhodamine 123	二氢罗丹明123	Heterocyclic compounds	杂环化合物	Heterocyclic compounds	杂环化合物	C21H18N2O3	3	0.6278	-	156013	142247	141096	258986	266398	452405	1.30155	0.10423	0.254809	0.449336	-1.15413	down	-	-
MW0153001	Lys-Ile-Arg-Asp	Lys-Ile-Arg-Asp	Amino acids and derivatives	氨基酸及其衍生物	Amino acids and derivatives	氨基酸及其衍生物	C22H42N8O7	3	0.6252	-	2958.79	1700.04	2152.27	12950.9	13145.1	6574.5	1.35657	0.0536735	0.181451	0.208479	-2.26203	down	-	-
MW0148229	delphinidin 3-O-(6''-O-malonyl)-beta-D-glucoside-3'-O-beta-D-glucoside	翠雀素3-O-(6''-O-丙二酰基)-BETA-葡糖苷-3'-O-BETA-葡糖苷；翠雀素3-O-(6''-O-丙二酰基)-BETA-D-葡萄糖苷-3'-O-BETA-D-葡萄糖苷	Flavonoids	黄酮	Anthocyanidins	花青素	C30H33O20+	3	0.6249	-	33776.6	38966.3	35251.3	20813	20956.4	4521.33	1.03534	0.0544936	0.182597	2.33295	1.22216	up	-	-
MW0114813	Meglumine	葡甲胺	Alcohol and amines	醇、胺类	Amines	胺类	C7H17NO5	3	0.6245	-	6964.55	10954.9	9979.68	16639.7	14300.9	27529.1	1.19583	0.12002	0.274061	0.477156	-1.06747	down	-	-
ZINC15274409	4,4',7,7'-Tetramethoxy-1,1'-biphenanthrene-2,2'-diol	1-(2-羟基-4，7-二甲氧基菲-1-基)-4，7-二甲氧基菲-2-醇	Benzene and substituted derivatives	苯及其衍生物	Benzene and substituted derivatives	苯及其衍生物	C32H26O6	3	0.624	-	4939.02	4789.61	5955.6	909.7	1501.69	2329.49	1.31898	0.00283255	0.0669726	3.3083	1.72609	up	-	-
MW0148055	Cys-Phe-His	半胱氨酸-苯丙氨酸-组氨酸	Amino acids and derivatives	氨基酸及其衍生物	Amino acids and derivatives	氨基酸及其衍生物	C18H23N5O4S1	3	0.6236	-	41528	38950.1	25534.6	20970.5	17184.3	11048.5	1.22047	0.0412736	0.161339	2.15458	1.10741	up	-	-
MW0164191	curcumin 4'-O-beta-D-gentiobioside	姜黄素 4'-O-β-D-龙胆二糖苷	Others	其它类	Ketone compounds	酮类化合物	C33H40O16	3	0.6235	-	33123.6	14126.5	8482.78	4452.42	4783.86	7479.03	1.11899	0.22162	0.382416	3.33424	1.73736	up	-	-
ZINC95919284	methyl 2-[(1S,4aS,4bS,5R,8aS,9aR,10R,10aS)-10-acetyloxy-1-(furan-3-yl)-4b,6,6,10a-tetramethyl-4-methylidene-7-oxo-1,2,4a,5,8,8a,9a,10-octahydroindeno[5,6-b][1]benzofuran-5-yl]acetate	2-[（1S，4aS，4bS，5R，8aS，9aR，10R，10aS)-10-乙酰氧基-1-(呋喃-3-基)-4b，6，6，10a-四甲基-4-亚甲基-7-氧代-1，2，4A，5，8，8A，9a，10-八氢茚并[5，6-b][1]苯并呋喃-5-基]乙酸甲酯	Benzene and substituted derivatives	苯及其衍生物	Benzene and substituted derivatives	苯及其衍生物	C29H36O7	3	0.6235	-	254044	197396	189185	126408	69777.4	110485	1.27206	0.0146437	0.109687	2.08897	1.06279	up	-	-
MW0145901	Asn-Thr-Glu	L-天冬酰胺-L-苏氨酰-L-谷氨酸	Amino acids and derivatives	氨基酸及其衍生物	Amino acids and derivatives	氨基酸及其衍生物	C13H22N4O8	3	0.6225	-	54842.5	47852.8	37333	21714.9	19803.1	25402.7	1.3505	0.0312102	0.146498	2.09245	1.06519	up	-	-
MW0148610	Ditrans,polycis-heptaprenyl diphosphate	二-反式，聚-顺-庚二烯基二磷酸酯；二磷酸四异戊二烯酯	Organic acids	有机酸	Organic acids	有机酸	C35H60O7P2	3	0.6208	-	1610.72	5607.06	3128	59790.4	83006.3	89320.2	1.40382	0.0132958	0.106297	0.0445714	-4.48774	down	C17436	-
MW0132261	3,4,5-trihydroxy-6-{[8-(2-hydroxypropan-2-yl)-2-oxo-4-(prop-2-en-1-yl)-2H,8H,9H-furo[2,3-h]chromen-5-yl]oxy}oxane-2-carboxylic acid	3，4，5-三羟基-6-{[8-(2-羟基丙-2-基)-2-氧代-4-(丙-2-烯-1-基)-2H，8H，9H-呋喃并[2，3-h]苯并吡喃-5-基]氧}氧杂环己烷-2-羧酸	Organic acids	有机酸	Organic acids	有机酸	C23H26O11	3	0.6194	-	176802	163909	134382	58650.8	53591	42580.8	1.40629	0.0071837	0.0829653	3.06863	1.61759	up	-	-
MW0007067	ethyl 6,7-dimethoxy-4-oxo-2,3-dihydro-1H-naphthalene-2-carboxylate	6,7-二甲氧基-4-氧代-2,3-二氢-1H-萘-2-羧酸乙酯	Others	其它类	Lactones	内酯类化合物	C15H18O5	3	0.6191	-	93973.8	67243.9	81629.7	44221.3	34600.3	28030.3	1.34284	0.0120883	0.102917	2.27275	1.18444	up	-	-
MW0158642	Tyr-Trp-Thr	酪氨酸-色氨酸-苏氨酸	Amino acids and derivatives	氨基酸及其衍生物	Amino acids and derivatives	氨基酸及其衍生物	C24H28N4O6	3	0.6181	-	159058	138819	159208	59270.3	60944.5	49994.6	1.42624	0.00116457	0.0554745	2.68543	1.42515	up	-	-
MW0130150	Quercetin 3-O-alpha-L-rhamnoside	2-(3,4-二羟苯基)-5,7-二羟基-3-[（3,4,5-三羟基-6-甲基氧基-2-基）氧]-4H-铬-4-酮	Others	其它类	Ketone compounds	酮类化合物	C21H20O11	3	0.6167	-	281504	283925	242281	518648	670709	740926	1.39369	0.0254177	0.135717	0.418441	-1.2569	down	-	-
MW0156861	Ser-Met-Met	丝氨酰-甲硫氨酰-甲硫氨酸	Amino acids and derivatives	氨基酸及其衍生物	Amino acids and derivatives	氨基酸及其衍生物	C13H25N3O5S2	3	0.6165	-	14998.2	11795.5	14534.4	4035	6422.31	8274.87	1.26896	0.00983386	0.0946556	2.20626	1.1416	up	-	-
MW0155095	Phe-Arg-Leu-Phe-Leu	Phe-Arg-Leu-Phe-Leu	Amino acids and derivatives	氨基酸及其衍生物	Amino acids and derivatives	氨基酸及其衍生物	C36H54N8O6	3	0.6155	-	132469	110293	114662	480603	513751	381883	1.42524	0.0115208	0.101883	0.259711	-1.94502	down	-	-
MW0059274	PE-NMe(14:1(9Z)/18:4(6Z,9Z,12Z,15Z))	PE-NMe(14:1(9Z)/18:4(6Z,9Z,12Z,15Z))	GP	甘油磷脂类	PE	磷脂酰乙醇胺	C38H66NO8P	3	0.6145	-	29371.1	46595.8	26403.3	12785.3	23676.8	14241.8	1.1623	0.0931294	0.23929	2.01898	1.01363	up	-	-
MW0149679	Gln-Glu-His	谷酰氨-谷氨酸-组氨酸	Amino acids and derivatives	氨基酸及其衍生物	Amino acids and derivatives	氨基酸及其衍生物	C16H24N6O7	3	0.6127	-	5732.13	5318.54	2736.39	1227.13	3077.98	2065.3	1.06526	0.10094	0.250059	2.16423	1.11386	up	-	-
MW0128697	[3,5-dihydroxy-2-(5,6,7-trihydroxy-4-oxo-2-phenyl-4H-chromen-8-yl)oxan-4-yl]oxidanesulfonic acid	[3，5-二羟基-2-(5，6，7-三羟基-4-氧代-2-苯基-4H-苯并吡喃-8-基）恶烷-4-基]氧代磺酸	Organic acids	有机酸	Organic acids	有机酸	C20H18O12S	3	0.6124	-	2150.91	3633.58	2528.76	372.6	279.9	281.92	1.42273	0.0306807	0.1458	8.8967	3.15327	up	-	-
MW0136489	6-{4-[5,7-dihydroxy-8-(3-methylbut-2-en-1-yl)-4-oxo-3,4-dihydro-2H-1-benzopyran-3-yl]-2-hydroxy-6-(3-methylbut-2-en-1-yl)phenoxy}-3,4,5-trihydroxyoxane-2-carboxylic acid	6-{4-[5，7-二羟基-8-(3-甲基丁-2-烯-1-基)-4-氧代-3，4-二氢-2H-1-苯并吡喃-3-基]-2-羟基-6-(3-甲基丁-2-烯-1-基）苯氧基}-3，4，5-三羟基恶烷-2-羧酸	Organic acids	有机酸	Organic acids	有机酸	C31H36O12	3	0.6118	-	14782.2	30355.2	25166.3	2147.67	2674.26	2104.96	1.41507	0.043695	0.166594	10.1494	3.34332	up	-	-
MW0158551	Tyr-Met-Ala	酪氨酸-甲硫氨酸-丙氨酸	Amino acids and derivatives	氨基酸及其衍生物	Amino acids and derivatives	氨基酸及其衍生物	C17H25N3O5S1	3	0.6096	-	27032.8	16487.7	28313.7	76916	36608.5	41766.7	1.1383	0.150591	0.309041	0.462577	-1.11223	down	-	-
MEDP1326	LysoPC(20:1(11Z))	LPC(20:1/0:0)	Lipids	脂质	LPC	溶血磷脂酰胆碱	C28H56NO7P	3	0.608	-	7476.48	9293.79	5465.69	1082.53	475.56	1900.98	1.32171	0.0195501	0.123728	6.42831	2.68444	up	C04230	ko00564
MW0141152	1,3-alpha-D-Mannosyl-1,2-alpha-D-mannosyl-1,2-alpha-D-mannosyl-D-mannose	1,3-alpha-D-Mannosyl-1,2-alpha-D-mannosyl-1,2-alpha-D-mannosyl-D-mannose	Others	其它类	Saccharides	糖类	C24H42O21	3	0.6021	-	26585.6	28165.2	29958	15933.1	9081.25	1815.16	1.0853	0.0357975	0.153512	3.1573	1.65869	up	C04861	-
MW0063140	PS(DiMe(11,3)/MonoMe(11,5))	PS(DiMe(11,3)/MonoMe(11,5))	GP	甘油磷脂类	PS	磷脂酰丝氨酸	C47H80NO12P	3	0.602	-	178348	151963	88428.5	78739	66460.4	46362.9	1.18179	0.0918598	0.237487	2.18592	1.12824	up	-	-
MW0119136	3-(1-Piperazinyl)-1,2-benzisothiazole	苯并异噻唑哌嗪	Benzene and substituted derivatives	苯及其衍生物	Benzene and substituted derivatives	苯及其衍生物	C11H13N3S	3	0.6001	-	18382.8	17621.5	12189.5	41214.2	30102.3	49609.4	1.33004	0.0386379	0.157659	0.398539	-1.32721	down	-	-
MW0144647	Ala-Leu-Tyr	L-丙氨酰-L-亮氨酰-L-酪氨酸	Amino acids and derivatives	氨基酸及其衍生物	Amino acids and derivatives	氨基酸及其衍生物	C18H27N3O5	3	0.599	-	7896.76	15419.7	16444.1	36444.4	27741.5	26921	1.2418	0.014042	0.108164	0.436416	-1.19622	down	-	-
MW0152255	Leu-Asp-Ala	L-亮氨酸-L-天冬氨酸-L-丙氨酸	Amino acids and derivatives	氨基酸及其衍生物	Amino acids and derivatives	氨基酸及其衍生物	C13H23N3O6	3	0.5974	-	11408.8	6749.86	6475.73	36815.2	38792.9	14581.9	1.24427	0.100827	0.250046	0.273139	-1.87229	down	-	-
MW0152303	Leu-Gln-Tyr-Asp	Leu-Gln-Tyr-Asp	Amino acids and derivatives	氨基酸及其衍生物	Amino acids and derivatives	氨基酸及其衍生物	C24H35N5O9	3	0.5967	-	24401.8	19366.4	19857.3	11533.1	9071.97	7455.46	1.36059	0.00518775	0.078477	2.26744	1.18106	up	-	-
MW0158660	Tyr-Val-Arg-Pro-Leu	酪氨酸-缬氨酸-精氨酸-脯氨酸-亮氨酸	Amino acids and derivatives	氨基酸及其衍生物	Amino acids and derivatives	氨基酸及其衍生物	C31H50N8O7	3	0.5962	-	4513.83	1305.53	5390.76	10564.9	11348.7	11127	1.16795	0.0246169	0.133957	0.339282	-1.55944	down	-	-
MW0159186	Val-Thr-Pro-Gly-Gly	Val-Thr-Pro-Gly-Gly	Amino acids and derivatives	氨基酸及其衍生物	Amino acids and derivatives	氨基酸及其衍生物	C18H31N5O7	3	0.5947	-	8490.5	17177.8	11897.4	23487	30744.3	51385.4	1.23731	0.102767	0.252718	0.35568	-1.49135	down	-	-
ZINC95912028	(2S)-2alpha-[(E)-2,4,5-Trimethoxystyryl]-3abeta-(4-methoxyphenyl)-6-methoxy-8,9abeta-dihydroxy-2,3,3a,9a-tetrahydro-9H-furo[3,2-b][1]benzopyran-9-one	（2S，3aR，9aR)-8，9a-二羟基-6-甲氧基-3a-(4-甲氧基苯基)-2-[（E)-2-(2，4，5-三甲氧基苯基）乙烯基]-2，3-二氢呋喃并[3，2-b]色烯-9-酮	Others	其它类	Ketone compounds	酮类化合物	C30H30O10	3	0.5944	-	4998.43	4869.99	3952.61	7345.37	7802.09	13498.7	1.24224	0.126269	0.280463	0.482474	-1.05148	down	-	-
MW0104092	3,6,11,12-Tetrakis(acetyloxy)-5-(4-hydroxyphenyl)-8-oxatricyclo[7.4.0.0^{2,7}]trideca-1(13),2,4,6,9,11-hexaen-4-yl acetate	3,6,11,12-四(乙酰氧基)-5-(4-羟基苯基)-8-氧杂三环[7.4.0.0^{2,7}]trideca-1(13),2,4,6,9, 11-hexaen-4-yl acetate	Organic acids	有机酸	Organic acids	有机酸	C28H22O12	3	0.5936	-	34056.7	46605.9	79634.1	24227.6	23585.8	28147.3	1.16738	0.173224	0.332132	2.11026	1.07742	up	-	-
MW0151604	Ile-Thr-Thr	L-异亮氨酸-L-苏氨酸-L-苏氨酸	Amino acids and derivatives	氨基酸及其衍生物	Amino acids and derivatives	氨基酸及其衍生物	C14H27N3O6	3	0.5926	-	49319.5	40591	44878.1	14207.2	18092.9	11088	1.39465	0.00087545	0.0527544	3.10658	1.63533	up	-	-
MW0129762	1-[3-[6-[2,4-dihydroxy-3-[(E)-3-methylbut-1-enyl]benzoyl]-5-(2,4-dihydroxyphenyl)-3-methylcyclohex-2-en-1-yl]-2,4-dihydroxyphenyl]-3-(2,4-dihydroxyphenyl)propan-1-one	1-[3-(6-{2，4-二羟基-3-[（1E)-3-甲基丁-1-烯-1-基]苯甲酰基}-5-(2，4-二羟基苯基)-3-甲基环己-2-烯-1-基)-2，4-二羟基苯基]-3-(2，4二羟基苯基）丙-1-酮	Benzene and substituted derivatives	苯及其衍生物	Benzene and substituted derivatives	苯及其衍生物	C40H40O10	3	0.5925	-	5497.39	6067.34	12470.6	23030.7	12513.2	19446.1	1.15864	0.0593436	0.188084	0.437086	-1.19401	down	-	-
MW0149846	Gln-Tyr-Thr-Lys	谷酰氨-酪氨酸-苏氨酸-赖氨酸	Amino acids and derivatives	氨基酸及其衍生物	Amino acids and derivatives	氨基酸及其衍生物	C24H38N6O8	3	0.5912	-	7549.85	8083.97	8956.51	24139.8	23921.9	29672.8	1.42571	0.0086482	0.0887779	0.316337	-1.66046	down	-	-
MW0164278	5'-Adenylyl sulfate(2-)	5'-腺苷酸硫酸盐(2-)	Nucleotides and derivatives	核苷酸及其衍生物	Nucleotides and derivatives	核苷酸及其衍生物	C10H12N5O10PS-2	3	0.5912	-	871.46	1273.66	580.25	205.57	368.34	432.41	1.20651	0.0919262	0.237493	2.70825	1.43736	up	-	-
MW0158462	Tyr-Glu-Phe	酪氨酸-谷氨酸-苯丙氨酸	Amino acids and derivatives	氨基酸及其衍生物	Amino acids and derivatives	氨基酸及其衍生物	C23H27N3O7	3	0.5911	-	58791.8	45642.9	50291.5	19909.3	24202.8	29276.7	1.35829	0.00623777	0.0818674	2.10831	1.07609	up	-	-
MW0146095	Asp-Glu-Asn	L-天冬氨酰-L-谷氨酰-L-天冬酰胺	Amino acids and derivatives	氨基酸及其衍生物	Amino acids and derivatives	氨基酸及其衍生物	C13H20N4O9	3	0.5908	-	164921	91214.8	96217.4	52506.5	49370.9	47224.4	1.30535	0.103665	0.254096	2.36317	1.24072	up	-	-
MEDP1460	Hydroxyeicosapentaenoic acid	羟基二十碳五烯酸	Lipids	脂质	Free fatty acids	游离脂肪酸	C20H30O3	3	0.5893	-	315332	277447	342676	86285.6	118720	91576.6	1.4153	0.0020289	0.0635586	3.15412	1.65724	up	-	-
MW0158519	Tyr-Leu-Gly-Lys-Arg	酪氨酸-亮氨酸-甘氨酸-赖氨酸-精氨酸	Amino acids and derivatives	氨基酸及其衍生物	Amino acids and derivatives	氨基酸及其衍生物	C29H49N9O7	3	0.5874	-	8990.85	18889.9	17678	45524.4	59292.8	54861.7	1.3446	0.00224334	0.0669726	0.285315	-1.80937	down	-	-
MW0155328	Phe-Ser-Gly-Thr-Trp	Phe-Ser-Gly-Thr-Trp	Amino acids and derivatives	氨基酸及其衍生物	Amino acids and derivatives	氨基酸及其衍生物	C29H36N6O8	3	0.5871	-	74666.9	44184.7	98528.8	27708.3	27396.2	31576.3	1.26803	0.108293	0.260481	2.50783	1.32644	up	-	-
ZINC85830402	3'-Hydroxyhegoflavone A	2-[2-[（2S)-2-(3，4-二羟基苯基)-5，7-二羟基-4-氧代-2，3-二氢苯并吡喃-6-基]-4，5-二羟基苯基]-5，7-二羟基苯并吡喃-4-酮	Others	其它类	Ketone compounds	酮类化合物	C30H20O12	3	0.5867	-	4268.77	12479	9580.96	2071.04	1574.26	1809.7	1.31898	0.100999	0.250071	4.82652	2.27098	up	-	-
MW0052813	10-(9Z-hexadecenoyloxy)-hexadecanoic acid	10-(9Z-hexadecenoyloxy)-hexadecanoic acid	Lipids	脂质	Free fatty acids	游离脂肪酸	C32H60O4	3	0.5821	-	13841.3	8096.97	15808.3	25544.6	64318.8	53403.2	1.27043	0.0876004	0.231473	0.26347	-1.92429	down	-	-
MW0144749	Ala-Thr-Leu-Asp	Ala-Thr-Leu-Asp	Amino acids and derivatives	氨基酸及其衍生物	Amino acids and derivatives	氨基酸及其衍生物	C17H30N4O8	3	0.5811	-	60677	45920	41802.3	17928.8	20919.8	35344.5	1.2081	0.0347725	0.152142	2.00017	1.00013	up	-	-
MW0158949	Val-Asp-Tyr-Val-Leu	Val-Asp-Tyr-Val-Leu	Amino acids and derivatives	氨基酸及其衍生物	Amino acids and derivatives	氨基酸及其衍生物	C29H45N5O9	3	0.5747	-	5076.9	1782.74	1926.64	7372.2	11049.2	12417.8	1.26776	0.0200573	0.124817	0.284906	-1.81144	down	-	-
MW0155179	Phe-Glu-His-Phe-Leu	Phe-Glu-His-Phe-Leu	Amino acids and derivatives	氨基酸及其衍生物	Amino acids and derivatives	氨基酸及其衍生物	C35H45N7O8	3	0.5732	-	50907.4	55535.9	61140.6	20465.3	13300.3	13204.7	1.40473	0.00056481	0.0506524	3.56787	1.83506	up	-	-
MW0142494	2'-N-Acetylparomamine	2-N-乙酰基苯基丙胺	Alcohol and amines	醇、胺类	Amines	胺类	C14H27N3O8	3	0.5718	-	74406.2	99313.1	103711	41951.1	34894.7	37763.4	1.39598	0.0226793	0.129596	2.42067	1.2754	up	C17582	ko00524,ko01110
MW0146224	Asp-Phe-Phe	L-天冬氨酸-L-苯丙氨酸-L-苯丙氨酸	Amino acids and derivatives	氨基酸及其衍生物	Amino acids and derivatives	氨基酸及其衍生物	C22H25N3O6	3	0.5714	-	22225.9	27048.4	45315.4	10649	4067.67	13300.4	1.21071	0.0722998	0.20945	3.37615	1.75538	up	-	-
MW0157824	Thr-Trp-Glu	苏氨酸-色氨酸-谷氨酸	Amino acids and derivatives	氨基酸及其衍生物	Amino acids and derivatives	氨基酸及其衍生物	C20H26N4O7	3	0.5698	-	73270.4	80235.1	86696.4	36833	18105.5	27642	1.3489	0.00206839	0.0635586	2.9087	1.54037	up	-	-
MW0153788	Methyl 10-gingerol	甲基- 10-姜酚	Others	其它类	Lactones	内酯类化合物	C22H36O4	3	0.5693	-	74961.2	34575.9	43256.3	121189	140458	123175	1.30192	0.0116839	0.102424	0.39705	-1.33261	down	-	-
MW0108144	Met-Asn-Lys	L-蛋氨酸-L-天冬酰胺-L-赖氨酸	Amino acids and derivatives	氨基酸及其衍生物	Amino acids and derivatives	氨基酸及其衍生物	C15H29N5O5S1	3	0.5676	-	99420.7	59879.6	81316.7	31086.4	31161.2	14681.6	1.29414	0.0251566	0.135257	3.12777	1.64514	up	-	-
MW0054848	methyl 3-ethenyl-4-(9H-pyrido[3,4-b]indol-1-ylmethyl)-2-[(2S,3R,4S,5S,6R)-3,4,5-trihydroxy-6-(hydroxymethyl)oxan-2-yl]oxy-3,4-dihydro-2H-pyran-5-carboxylate	甲基 3-ethenyl-4-(9H-pyrido[3,4-b]indol-1-ylmethyl)-2-[(2S,3R,4S,5S,6R)-3,4,5-trihydroxy-6- (羟甲基)oxan-2-yl]oxy-3,4-dihydro-2H-pyran-5-carboxylate	Others	其它类	Lactones	内酯类化合物	C27H30N2O9	3	0.5648	-	755.71	535.72	117.9	1187.87	1749.21	1147.78	1.08155	0.0297666	0.144152	0.345013	-1.53528	down	-	-
MW0011128	(3alpha,5alpha,22R,23R)-Cholestane-3,22,23-triol	(3alpha,5alpha,22R,23R)-Cholestane-3,22,23-triol	Alcohol and amines	醇、胺类	Alcohols	醇类	C27H48O3	3	0.5635	-	23499.1	30088.2	42223.5	94061.7	75959.9	61999.2	1.30394	0.0209069	0.125984	0.412941	-1.27599	down	-	-
ZINC44404823	(1R,2S,4S,5R,10R,11S)-5-hydroxy-16-[(1S)-1-[(1S,2R,4R,6S)-2-hydroxy-1,6-dimethyl-3,7-dioxabicyclo[4.1.0]heptan-4-yl]ethyl]-10-methyl-3-oxapentacyclo[9.8.0.02,4.05,10.014,19]nonadeca-7,14(19),15,17-tetraen-9-one	假酸浆稀酮	Benzene and substituted derivatives	苯及其衍生物	Benzene and substituted derivatives	苯及其衍生物	C28H34O6	3	0.5599	-	13429.6	13854.1	20132.3	5823.77	5848.69	4237	1.38135	0.0337881	0.15015	2.98037	1.57549	up	-	-
MW0013070	2,2,4,4-Tetramethyl-6-(1-oxobutyl)-1,3,5-cyclohexanetrione	2,2,4,4-四甲基-6-(1-氧丁基)-1,3,5-环己三酮	Others	其它类	Ketone compounds	酮类化合物	C14H20O4	3	0.5594	-	2855.73	7342.05	8046.47	14026.2	9690.97	14082.4	1.08116	0.0410371	0.161093	0.482657	-1.05093	down	-	-
MW0161844	Cocaine(1+)	可卡因（1+）	Organic acids	有机酸	Organic acids	有机酸	C17H22NO4+	3	0.5577	-	218.97	210.95	202.32	72.24	129.62	75.03	1.31869	0.0187533	0.121278	2.28336	1.19116	up	-	-
MW0068693	TG(14:1(9Z)/22:4(7Z,10Z,13Z,16Z)/22:4(7Z,10Z,13Z,16Z))	TG(14:1(9Z)/22:4(7Z,10Z,13Z,16Z)/22:4(7Z,10Z,13Z,16Z))	GL	甘油脂类	TG	甘油三酯	C61H100O6	3	0.5535	-	381684	287061	361702	79865.2	160149	95955.8	1.34396	0.00391497	0.0721587	3.06708	1.61687	up	-	-
ZINC44351483	Tetrahydrobungeanool	四氢花椒素	Alkaloids	生物碱	Alkaloids	生物碱	C18H33NO2	3	0.5484	-	80526.9	211229	116693	282115	393543	539944	1.24137	0.0491989	0.175064	0.336006	-1.57344	down	-	-
MW0106886	Glu-Arg-Lys	谷氨酸-精氨酸-赖氨酸	Amino acids and derivatives	氨基酸及其衍生物	Amino acids and derivatives	氨基酸及其衍生物	C17H33N7O6	3	0.5455	-	21746.9	44067.6	12587.9	1299.95	3119.06	961.46	1.34653	0.120523	0.274412	14.5717	3.86509	up	-	-
MW0146255	Asp-Ser-Glu	L-天冬氨酰-L-丝氨酰-L-谷氨酸	Amino acids and derivatives	氨基酸及其衍生物	Amino acids and derivatives	氨基酸及其衍生物	C12H19N3O9	3	0.5429	-	185706	254267	230395	379812	468837	505205	1.35792	0.0117967	0.102424	0.495155	-1.01405	down	-	-
MW0011879	PE(18:3(9Z,12Z,15Z)/18:3(9Z,12Z,15Z))	1,2-Dilinolenoyl-sn-glycero-3-phosphoethanolamine	GP	甘油磷脂类	PE	磷脂酰乙醇胺	C41H70NO8P	3	0.5384	-	218278	500360	248010	81698.3	116254	89919.8	1.29653	0.125376	0.280089	3.3579	1.74756	up	-	-
MW0160074	2,3-Dimethoxy-5-methyl-6-(farnesylfarnesyl)-1,4-benzoquinone	2,3-Dimethoxy-5-methyl-6-(farnesylfarnesyl)-1,4-benzoquinone	Others	其它类	Ketone compounds	酮类化合物	C39H58O4	3	0.5381	-	10433.9	10231.1	6317.39	22209.7	27235.3	26703	1.37293	0.00158763	0.0596812	0.35434	-1.49679	down	-	-
ZINC44281721	(4aS,6aR,6aS,6bR,8aR,10S,12aR,14bS)-2,2,6a,6b,9,9,12a-heptamethyl-10-[(2S,3R,4S,5S)-3,4,5-trihydroxyoxan-2-yl]oxy-1,3,4,5,6,6a,7,8,8a,10,11,12,13,14b-tetradecahydropicene-4a-carboxylic acid	（4aS，6aR，6aS，6Br，8aR，10S，12aR，14bS)-2，2，6a，6B，9，9，12a-七甲基-10-[（2S，3R，4S，5S)-3，4，5-三羟基恶烷-2-基]氧基-1，3，4，5，6，6a，7，8，8A，10，11，12，13，14b-十四氢吡喃-4a-	Organic acids	有机酸	Organic acids	有机酸	C35H56O7	3	0.5356	-	12054.5	11553.3	13812.7	36990	38925.2	45983.8	1.42686	0.00656412	0.0818751	0.30698	-1.70379	down	-	-
MW0157030	Ser-Trp-OH	丝氨酸-色氨酸-OH	Amino acids and derivatives	氨基酸及其衍生物	Amino acids and derivatives	氨基酸及其衍生物	C14H17N3O4	3	0.5353	-	212920	336871	241949	91460.9	96741.3	95260.2	1.39071	0.0452765	0.169385	2.7931	1.48187	up	-	-
MW0165918	(-)-Dehydrodiconiferyl acid carboxylate	(-)-脱氢二松果酸羧酸酯	Organic acids	有机酸	Organic acids	有机酸	C20H16O8-2	3	0.5343	-	19735.9	20678.9	25705	1838.6	7990.02	4114.76	1.28857	0.0025328	0.0669726	4.74202	2.2455	up	-	-
MW0011891	1,2-Dimyristoyl-sn-glycerol	1，2-二肉豆蔻酰-sn-甘油	GL	甘油脂类	DG	甘油二酯	C31H60O5	3	0.5271	-	32.69	1980.81	162.79	1724.81	3513.07	13047.2	1.07564	0.264236	0.422597	0.11902	-3.07072	down	C16667	-
MW0156663	Ser-Asn-Leu	L-丝氨酰-L-天冬酰胺酰-L-亮氨酸	Amino acids and derivatives	氨基酸及其衍生物	Amino acids and derivatives	氨基酸及其衍生物	C13H24N4O6	3	0.527	-	86866.6	78713.9	53832.3	125279	208754	401333	1.20972	0.16828	0.32684	0.298373	-1.74481	down	-	-
ZINC95912566	[(8S,9S,10S,11R)-11-acetyloxy-9-hydroxy-3,4,5,19-tetramethoxy-9,10-dimethyl-15,17-dioxatetracyclo[10.7.0.02,7.014,18]nonadeca-1(19),2,4,6,12,14(18)-hexaen-8-yl] (Z)-2-methylbut-2-enoate	[（8S，9S，10S，11R)-11-乙酰氧基-9-羟基-3，4，5，19-四甲氧基-9，10-二甲基-15，17-二氧杂四环[10.7.0.02，7.014，18]十九-1（19)-2，4，6，12，14（18)-己烯-8-基]（Z)-2-甲基丁-2-烯酸酯	Others	其它类	Lactones	内酯类化合物	C30H36O11	3	0.5269	-	4462.84	5827.58	6885.06	12292.7	19630	21254.3	1.34703	0.0417895	0.162231	0.322987	-1.63045	down	-	-
MW0154398	Neu5Ac2-3[GalNAc1-4]Gal1-4GlcNAcSp	Neu5Ac2-3[GalNAc1-4]Gal1-4GlcNAcSp	Others	其它类	Saccharides	糖类	C35H58N6O24	3	0.522	-	44874.2	38818.1	52072.5	19262.4	11380.8	18507.5	1.3572	0.0052474	0.078477	2.76221	1.46582	up	-	-
MW0166143	(2R,3S,4S,5R,6S)-2-(hydroxymethyl)-6-[6-[[(3S)-3-methyl-4-[(2S,3R,4S,5S,6R)-3,4,5-trihydroxy-6-(hydroxymethyl)oxan-2-yl]oxybutyl]amino]purin-9-yl]oxane-3,4,5-triol	(2R,3S,4S,5R,6S)-2-(羟甲基)-6-[6-[[(3S)-3-甲基-4-[(2S,3R,4S,5S,6R)-3, 4,5-trihydroxy-6-(hydroxymethyl)oxan-2-yl]oxybutyl]amino]purin-9-yl]oxane-3,4,5-triol	Alcohol and amines	醇、胺类	Alcohols	醇类	C22H35N5O11	3	0.5207	-	10006.5	6884.34	7201.37	301.06	1725.36	981.21	1.30874	0.0103139	0.0964508	8.01038	3.00187	up	-	-
MW0128117	(3-{6,8-bis[3,7-dihydroxy-2-(3-hydroxyphenyl)-3,4-dihydro-2H-1-benzopyran-4-yl]-3,5,7-trihydroxy-3,4-dihydro-2H-1-benzopyran-2-yl}phenyl)oxidanesulfonic acid	（3-{6，8-双[3，7-二羟基-2-(3-羟基苯基)-3，4-二氢-2H-1-苯并吡喃-4-基]-3，5，7-三羟基-3，4-二氢-2H-1-苯并吡喃-2-基}苯基）氧烷磺酸	Organic acids	有机酸	Organic acids	有机酸	C45H38O16S	3	0.5201	-	2.18249e+06	1.58314e+06	2.00674e+06	878486	723314	307990	1.25745	0.00642432	0.0818674	3.02252	1.59575	up	-	-
MW0158136	Trp-Gln-Phe	色氨酸-谷氨酰胺-苯丙氨酸	Amino acids and derivatives	氨基酸及其衍生物	Amino acids and derivatives	氨基酸及其衍生物	C25H29N5O5	3	0.5197	-	648.76	1346.84	894.21	17671.1	18348.5	42953.6	1.40926	0.092725	0.238892	0.0365923	-4.77232	down	-	-
MEDN1338	2-Hydroxy HippuricAcid	2-羟基马尿酸	Organic acids	有机酸	Organic acids	有机酸	C5H4O3	3	0.5191	-	17368.2	38246.4	32520	86151.4	81440	127453	1.31434	0.0278345	0.139926	0.298717	-1.74315	down	-	-
MW0056871	PC(15:0/22:5(4Z,7Z,10Z,13Z,16Z))	PC(15:0/22:5(4Z,7Z,10Z,13Z,16Z))	GP	甘油磷脂类	PC	磷脂酰胆碱	C45H80NO8P	3	0.5189	-	344817	463699	475573	633146	1.327e+06	697707	1.15491	0.170522	0.329127	0.48313	-1.04952	down	-	-
MW0166247	Decarboxy-demycosaminyl-nystatin	脱羧-脱霉胺基制霉菌素	Others	其它类	Ketone compounds	酮类化合物	C41H66O12	3	0.5168	-	18825.5	17041.2	20988	56266.9	42703	34676.1	1.35308	0.0514971	0.177706	0.425412	-1.23307	down	-	-
MW0055565	[(2R)-1-phosphonooxy-3-tetradecanoyloxypropan-2-yl] (Z)-tetracos-15-enoate	PA(14:0/24:1(15Z))	GP	甘油磷脂类	PA	磷脂酸	C41H79O8P	3	0.5154	-	164387	122908	114718	267627	418732	142521	1.00646	0.213546	0.373062	0.485008	-1.04392	down	-	-
MW0156880	Ser-Phe-Tyr	L-丝氨酰-L-苯丙氨酰-L-酪氨酸	Amino acids and derivatives	氨基酸及其衍生物	Amino acids and derivatives	氨基酸及其衍生物	C21H25N3O6	3	0.5146	-	11140.7	528.74	8152.12	67734.6	57385.9	105496	1.20519	0.0356468	0.153149	0.0859503	-3.54035	down	-	-
MW0106289	Cysteylglycyllysine	Cys Gly Lys	Amino acids and derivatives	氨基酸及其衍生物	Amino acids and derivatives	氨基酸及其衍生物	C11H22N4O4S	3	0.5118	-	13811.4	21255	18240.9	8829.14	10318.5	4386.08	1.19731	0.0254165	0.135717	2.26514	1.1796	up	-	-
MW0151655	Ile-Val-Phe	L-异亮氨酸-L-缬氨酸-L-苯丙氨酸	Amino acids and derivatives	氨基酸及其衍生物	Amino acids and derivatives	氨基酸及其衍生物	C20H31N3O4	3	0.511	-	38756.5	19600	21389.5	45385.9	105136	65442.7	1.20834	0.110269	0.26304	0.369255	-1.43731	down	-	-
MW0049820	DG(16:0/20:5(5Z,8Z,11Z,14Z,17Z)/0:0)	DG(16:0/20:5(5Z,8Z,11Z,14Z,17Z)/0:0)	GL	甘油脂类	DG	甘油二酯	C39H66O5	3	0.5098	-	0.52	4.71	1.94	7.44	7.58	5.16	1.04388	0.0504649	0.176982	0.355302	-1.49288	down	-	-
ZINC33830068	(1R,3S)-2,2-dimethylcyclopentane-1,3-dicarboxylic acid	(1R,3S)-2,2-dimethylcyclopentane-1,3-dicarboxylic acid	Organic acids	有机酸	Organic acids	有机酸	C9H14O4	3	0.5085	-	21552.3	20016.5	23823.5	1335.54	1192.72	811.31	1.43512	0.00242279	0.0669726	19.5811	4.29139	up	-	-
MW0105783	Asn-Leu-Arg	L-天冬酰胺-L-亮氨酰-L-精氨酸	Amino acids and derivatives	氨基酸及其衍生物	Amino acids and derivatives	氨基酸及其衍生物	C16H31N7O5	3	0.5084	-	22398.3	11644.3	7512.95	4605.85	4026.65	4692.94	1.22097	0.167705	0.32652	3.11851	1.64086	up	-	-
MW0112350	3,4,5-trihydroxy-6-({2-[2,4,6-trihydroxy-3-(3-methylbut-2-en-1-yl)phenyl]acetyl}oxy)oxane-2-carboxylic acid	3，4，5-三羟基-6-({2-[2，4，6-三羟基-3-(3-甲基-2-丁烯-1-基）苯基]乙酰基}氧基）氧烷-2-羧酸	Organic acids	有机酸	Organic acids	有机酸	C19H24O11	3	0.5021	-	2137.41	3226.15	1860.32	6424.66	5555.22	12356.3	1.2918	0.111371	0.264529	0.296837	-1.75226	down	-	-
MW0114532	3-Indolylmethyl glucosinolate	3-吲哚基甲基硫苷	Others	其它类	Glucosinolates	硫苷类	C16H20N2O9S2	2	0.9227	4356-52-9	214914	1.97081e+06	252519	107906	143444	65448.5	1.03459	0.346443	0.498556	7.69652	2.94421	up	-	-
MW0000482	Leurocristine	Leurocristine	Alkaloids	生物碱	Alkaloids	生物碱	C46H56N4O10	2	0.9167	57-22-7 | 132142-73-5	49130.1	46530.5	59251	19702.6	14124.5	18168.5	1.40901	0.00559412	0.0790937	2.97932	1.57498	up	-	-
MEDP1568	Xanthosine-5'-monophosphate	黄嘌呤-5'-单磷酸	Nucleotides and derivatives	核苷酸及其衍生物	Nucleotides and derivatives	核苷酸及其衍生物	C10H13N4O9P	2	0.899	523-98-8	256972	308825	303365	30346.8	40001.7	24461	1.42938	0.00235733	0.0669726	9.16746	3.19652	up	C00655	ko00230,ko01100,ko01110,ko01232
MW0052644	escin Ib	七叶皂苷	Steroids	甾体	Steroid	甾体	C55H86O24	2	0.897	26339-90-2 | 6805-41-0	19962.5	16412.4	11908.2	36354.8	54024.2	48034.4	1.36148	0.0160548	0.112789	0.348832	-1.51939	down	C08921	-
MW0169603	Osajin	Osajin	Flavonoids	黄酮	Isoflavones	异黄酮	C25H24O5	2	0.8874	482-53-1	80460.2	53703.3	62485.9	770.12	12082	14408.9	1.14994	0.0075516	0.0849427	7.21358	2.85071	up	-	-
MW0148543	Dimethoxycurcumin	二甲氧基姜黄素	Phenolic acids	酚酸类	Phenolic acids	酚酸类	C23H24O6	2	0.8767	160096-59-3	129888	90103.1	84739.5	253184	277986	310314	1.39065	0.001324	0.0554745	0.362134	-1.46541	down	-	-
MW0006472	Cannabidiolic acid	大麻二酚酸	Others	其它类	Others	其它	C22H30O4	2	0.8698	1244-58-2	152317	95877	102730	63399.5	43191	65837.6	1.25766	0.0631565	0.194586	2.03519	1.02517	up	-	-
MW0011760	[6]-Gingerdiol 3,5-diacetate	[6]-姜二醇3，5-二乙酸酯	Others	其它类	Lactones	内酯类化合物	C21H32O6	2	0.864	195204-05-8	283.89	607.67	835.13	16558.5	1734.45	11674.2	1.23589	0.163392	0.321974	0.0576194	-4.1173	down	-	-
MW0109969	Thr-Ser	苏氨酸-丝氨酸	Amino acids and derivatives	氨基酸及其衍生物	Amino acids and derivatives	氨基酸及其衍生物	C7H14N2O5	2	0.8566	61043-86-5	7799.66	8239.57	11181.5	33787.8	57388.1	38122.5	1.39684	0.0400518	0.158838	0.210526	-2.24793	down	-	-
MW0015555	Acetylvalerenolic acid	乙酰戊烯醇酸	Terpenoids	萜类	Sesquiterpenoids	倍半萜	C17H24O4	2	0.8485	81397-67-3	92231.5	141304	117336	284199	265460	318299	1.38414	0.00123491	0.0554745	0.404248	-1.30669	down	-	-
MEDL00410	1,3-Dihydroxy-6-methoxy-8-methyl-9-xanthenone	1,3-二羟基-6-甲氧基-8-甲基-9-呫吨酮	Flavonoids	黄酮	Other Flavonoids	其它类黄酮	C15H12O5	2	0.8281	22938-77-8	66735.8	56712.1	23451	146024	117023	134173	1.23765	0.00903288	0.0907198	0.369818	-1.43511	down	-	-
MW0157897	Thr-Met	苏氨酸-甲硫氨酸	Amino acids and derivatives	氨基酸及其衍生物	Amino acids and derivatives	氨基酸及其衍生物	C9H18N2O4S	2	0.8192	90729-28-5	229906	307579	682906	134318	137860	120459	1.22229	0.187094	0.346138	3.10819	1.63607	up	-	-
MW0158681	Tyr-Ala	L-酪氨酸-L-丙氨酸	Amino acids and derivatives	氨基酸及其衍生物	Amino acids and derivatives	氨基酸及其衍生物	C12H16N2O4	2	0.8078	730-08-5	367993	335080	348503	130863	119061	168354	1.40569	0.000665276	0.0506524	2.51406	1.33002	up	-	-
MW0054376	Linoleic Acid-d4	亚油酸-d4	Lipids	脂质	Free fatty acids	游离脂肪酸	C18H32O2	2	0.799	79050-23-0	121975	144261	432143	95198.5	95541.3	55854.5	1.04764	0.269576	0.425453	2.8321	1.50187	up	-	-
MW0012312	9s,13r-12-Oxophytodienoic Acid	9s,13r-12-氧代植物二烯酸	Lipids	脂质	Free fatty acids	游离脂肪酸	C18H28O3	2	0.7983	71606-07-0 | 67204-66-4	7377.01	13065.5	8861.25	26115.8	26639.8	64199.1	1.28259	0.144048	0.300937	0.250557	-1.99679	down	-	-
MW0114515	Gentianose	龙胆糖	Others	其它类	Saccharides	糖类	C18H32O16	2	0.7956	25954-44-3	457875	678354	727291	240926	221837	290857	1.35564	0.0399372	0.158838	2.47276	1.30612	up	C08239	-
MW0062101	Plumieride	鸡蛋花苷	Terpenoids	萜类	Monoterpenoids	倍萜	C21H26O12	2	0.7956	511-89-7	967892	653978	778322	444654	433352	110322	1.0705	0.0314172	0.146498	2.42854	1.28009	up	C09797	-
MW0105514	Ala-Gly	甘氨酸	Amino acids and derivatives	氨基酸及其衍生物	Amino acids and derivatives	氨基酸及其衍生物	C5H10N2O3	2	0.7901	687-69-4 | 25765-55-3	79042.3	124222	101823	34766.6	29264.1	40840.4	1.37958	0.0297373	0.144152	2.90917	1.54061	up	-	-
MW0132689	Dihydrokaempferol	3，5，7-三羟基-2-(4-羟基苯基)-3，4-二氢-2H-1-苯并吡喃-4-酮	Benzene and substituted derivatives	苯及其衍生物	Benzene and substituted derivatives	苯及其衍生物	C15H12O6	2	0.7832	104486-98-8 | 5150-32-3 | 724434-08-6	169266	370639	428018	176297	166517	70030.6	1.04119	0.128179	0.28249	2.34452	1.22929	up	-	-
MW0124466	Isoeugenitol	异丁香酚	Heterocyclic compounds	杂环化合物	Heterocyclic compounds	杂环化合物	C11H10O4	2	0.7787	479-06-1	18105.2	63671.4	25825.1	70178.6	72020.1	171187	1.10327	0.165029	0.323378	0.343352	-1.54224	down	-	-
MW0138125	(E)-Ethyl 3-(4-hydroxyphenyl)acrylate	对-香豆酸乙酯	Others	其它类	Lactones	内酯类化合物	C11H12O3	2	0.7763	7362-39-2 | 2979-06-8	35748.7	51509	54685.1	20207.7	23768.8	24759.3	1.33642	0.0465721	0.171232	2.06505	1.04618	up	-	-
MEDN1037	p-Cresol	4-甲基苯酚	Phenolic acids	酚酸类	Phenolic acids	酚酸类	C7H8O	2	0.7714	106-44-5	112148	165340	131713	325416	435801	547046	1.37245	0.0364104	0.154883	0.312782	-1.67677	down	C01468	ko01100
MW0108765	Neotame	纽甜	Benzene and substituted derivatives	苯及其衍生物	Benzene and substituted derivatives	苯及其衍生物	C20H30N2O5	2	0.7714	165450-17-9	4159.82	4736.95	4134.85	11308	27204	69524.9	1.25663	0.209892	0.369741	0.120622	-3.05143	down	-	-
MW0006987	Epsilon-pyrromycinone	芸香酮	Benzene and substituted derivatives	苯及其衍生物	Benzene and substituted derivatives	苯及其衍生物	C22H20O9	2	0.7702	21288-61-9	133936	76208.7	69691.2	33997.4	43480.9	25233.7	1.27409	0.093433	0.239651	2.72448	1.44598	up	-	-
MW0129522	2',4-Dihydroxy-4',6'-dimethoxychalcone	黄卡瓦胡椒素 C	Flavonoids	黄酮	Chalcones	查耳酮	C17H16O5	2	0.7701	37308-75-1	948.37	2479.53	2705.42	13657.8	15566	8133.47	1.32823	0.0364221	0.154883	0.16418	-2.60665	down	-	-
MW0052373	Dihydrojasmonic acid	二氢茉莉酮酸	Organic acids	有机酸	Organic acids	有机酸	C12H20O3	2	0.7674	98674-52-3	15448.4	28288.2	25096.7	6053.05	5603.81	7521.92	1.37243	0.0475148	0.173053	3.58904	1.8436	up	-	-
MEDTN00017	Inositol 1-phosphate	1-磷酸肌醇	Organic acids	有机酸	Organic acids	有机酸	C6H13O9P	2	0.7652	15421-51-9 | 2831-74-5 | 573-35-3	17948.3	9648.18	15676	43459.5	62362	19603.7	1.13167	0.152655	0.311897	0.345006	-1.53531	down	C01177	ko00562,ko01100,ko02010,ko04070
MW0112794	Keto-Deoxy-Nonulonic acid	酮脱氧壬酸	Organic acids	有机酸	Organic acids	有机酸	C9H16O9	2	0.7516	153666-19-4	26789.1	39212.8	31259.5	99680.4	111172	68594.8	1.36137	0.0330879	0.14894	0.348049	-1.52264	down	C20934	ko00520,ko01100,ko01250
MEDP0434	1-Heptadecanoyl-sn-glycero-3-phosphocholine	溶血磷脂酰胆碱 17:0	Lipids	脂质	LPC	溶血磷脂酰胆碱	C25H52NO7P	2	0.7494	50930-23-9	20203.4	20598.8	22405.6	64616.9	61584.7	65872	1.43848	7.33023e-05	0.0234053	0.329081	-1.60349	down	C04230	ko00564
MW0113885	Aloesin	芦荟苦素	Others	其它类	Chromone	色酮类	C19H22O9	2	0.7445	30861-27-9	138896	116699	129609	61350	53904.2	43104.9	1.39815	0.000967848	0.0541062	2.43248	1.28243	up	C08994 | C15539	-
MW0106675	Ethyl N-acetyl-L-tyrosinate	N-乙酰-L-酪氨酸乙酯	Amino acids and derivatives	氨基酸及其衍生物	Amino acids and derivatives	氨基酸及其衍生物	C13H17NO4	2	0.7426	840-97-1	3052.56	5474.5	6371.51	475.09	1980.43	780.92	1.25324	0.0417753	0.162231	4.60338	2.20269	up	C01657	-
MEDN0624	Adenosine-5'-phosphosulfate	腺苷-5'-磷酸硫酸酐	Nucleotides and derivatives	核苷酸及其衍生物	Nucleotides and derivatives	核苷酸及其衍生物	C10H14N5O10PS	2	0.74	485-84-7	156111	168714	168123	85995.2	97747.8	40873.4	1.21575	0.0300091	0.145034	2.19462	1.13397	up	C00224	ko00230,ko00261,ko00920,ko01100,ko01110
MW0103387	AICA ribonucleotide	AICA ribonucleotide	Nucleotides and derivatives	核苷酸及其衍生物	Nucleotides and derivatives	核苷酸及其衍生物	C9H15N4O8P	2	0.7353	3031-94-5	62162.5	42538.9	26540.7	112599	117773	52490.1	1.05585	0.121714	0.275623	0.463979	-1.10787	down	C04677	ko00230,ko00340,ko01100,ko01110
MW0110229	H-Tyr-tyr-tyr-OH	H-Tyr-tyr-tyr-OH	Amino acids and derivatives	氨基酸及其衍生物	Amino acids and derivatives	氨基酸及其衍生物	C27H29N3O7	2	0.7313	7390-78-5	7039.57	15811.9	12729.1	47162.5	56881.8	73069.2	1.36819	0.0165669	0.113763	0.200891	-2.31551	down	-	-
MW0137080	7-Hydroxyflavanone	7-羟基二氢黄酮	Flavonoids	黄酮	Flavanones	二氢黄酮	C15H12O3	2	0.7303	6515-36-2 | 41680-08-4	129166	19855.1	46762.4	7595.69	13948.7	6529.31	1.18915	0.230777	0.389242	6.9739	2.80197	up	-	-
MW0133087	3-Hydroxy-3',4'-dimethoxyflavone	3-羟基-3',4'-二甲氧基黄酮	Flavonoids	黄酮	Flavones	黄酮	C17H14O5	2	0.728	6889-80-1	23797.6	26710.4	23559	5382.76	21236.5	5915.43	1.09189	0.11182	0.264751	2.27655	1.18685	up	-	-
MEDN1401	5-Phenylpenta-2,4-dienoic acid	5-苯基戊烷-2,4-双酸	Organic acids	有机酸	Organic acids	有机酸	C11H10O2	2	0.7274	1552-94-9 | 28010-12-0 | 185152-35-6 | 38446-98-9	156579	192663	173668	411212	361551	563092	1.37692	0.0430757	0.165126	0.391442	-1.35313	down	-	-
MW0103583	Guanosine diphosphate mannose	鸟苷二磷酸甘露糖	Nucleotides and derivatives	核苷酸及其衍生物	Nucleotides and derivatives	核苷酸及其衍生物	C16H25N5O16P2	2	0.7266	3123-67-9	8367.73	3877.13	1903.39	69929.2	66788	27195.6	1.33608	0.0655768	0.199553	0.0863158	-3.53423	down	C00096	ko00051,ko00053,ko00510,ko00520,ko01100,ko01110,ko01240,ko01250
MW0110101	Trp-Asp	色氨酸-天冬氨酸	Amino acids and derivatives	氨基酸及其衍生物	Amino acids and derivatives	氨基酸及其衍生物	C15H17N3O5	2	0.7257	71835-78-4	268.01	1788.35	492.91	6745.34	10473.8	2934.82	1.24024	0.10835	0.260481	0.12649	-2.98291	down	-	-
MW0139746	Spinosin	斯皮诺素	Flavonoids	黄酮	Flavones	黄酮	C28H32O15	2	0.7223	72063-39-9	26229.7	48149.3	33692.9	100601	112746	132074	1.37236	0.00315873	0.0680309	0.312871	-1.67636	down	C17834	-
MW0131236	Hesperetin dihydrochalcone	3-(3-羟基-4-甲氧基苯基)-1-(2，4，6-三羟基苯基）丙-1-酮	Others	其它类	Ketone compounds	酮类化合物	C16H16O6	2	0.7222	35400-60-3	34916.7	36012.5	57921.4	17894.8	17508.9	17224.4	1.35409	0.0769446	0.214804	2.44832	1.29179	up	-	-
MW0005838	6-Phosphogluconic acid	6-磷酸葡萄糖酸	Others	其它类	Saccharides	糖类	C6H13O10P	2	0.7203	921-62-0	11521.4	51189.4	39707.4	324.99	981.61	4412.16	1.26612	0.110073	0.26304	17.9092	4.16263	up	C00345	ko00030,ko01100,ko01110,ko01200
MW0109790	Hydroxypropanedioic acid	丙醇二酸	Organic acids	有机酸	Organic acids	有机酸	C3H4O5	2	0.718	80-69-3	40127.3	33091	25656.2	10719.8	9855.35	6491.17	1.37578	0.0214038	0.126559	3.65305	1.8691	up	C02287	-
MW0108187	Met-ala	甲硫氨酰丙氨酸	Amino acids and derivatives	氨基酸及其衍生物	Amino acids and derivatives	氨基酸及其衍生物	C8H16N2O3S	2	0.7178	3061-96-9	42135.6	48068.7	48660.5	11907.5	2465.51	6780.55	1.31784	0.000481073	0.0506524	6.56459	2.7147	up	-	-
MW0109227	Phenylalanylserine	苯丙氨酰丝氨酸	Amino acids and derivatives	氨基酸及其衍生物	Amino acids and derivatives	氨基酸及其衍生物	C12H16N2O4	2	0.715	16053-39-7	128392	67862.9	70663.9	46559.3	30287.7	45412.1	1.20156	0.126357	0.280525	2.18323	1.12646	up	-	-
MW0007933	DL-2-(2,4-Dinitroanilino)-4-(methylsulphinyl)butyric acid	N-(2,4-二硝基苯基)-DL-蛋氨酸亚砜	Benzene and substituted derivatives	苯及其衍生物	Benzene and substituted derivatives	苯及其衍生物	C11H13N3O7S	2	0.7142	1695-02-9	86415.9	101472	100815	277422	205910	130096	1.21381	0.12407	0.278877	0.470638	-1.08731	down	-	-
MW0107036	Glu-Thr	谷氨酸-苏氨酸	Amino acids and derivatives	氨基酸及其衍生物	Amino acids and derivatives	氨基酸及其衍生物	C9H16N2O6	2	0.7118	6875-80-5	206.47	2599.22	1761.63	80484.7	201320	78030.9	1.3556	0.100537	0.250005	0.0126928	-6.29985	down	-	-
MW0010818	(10E,12Z)-9-HODE	(10E,12Z)-9-HODE	Lipids	脂质	Free fatty acids	游离脂肪酸	C18H32O3	2	0.7114	98524-19-7	90383.8	145999	84401.6	383109	395314	1.2956e+06	1.28912	0.192291	0.352381	0.154668	-2.69276	down	-	-
MW0052883	Farnesyl diphosphate	法尼焦磷酸	Organic acids	有机酸	Organic acids	有机酸	C15H28O7P2	2	0.7111	13058-04-3	5104.9	2068.3	3451.1	2068.29	1473.66	1143.22	1.12781	0.143407	0.300411	2.26764	1.18119	up	C00448	ko00100,ko00900,ko00906,ko00909,ko00999,ko01100,ko01110
MW0157896	L-Lysine, L-threonyl-	L-赖氨酸、L-苏氨酰-	Amino acids and derivatives	氨基酸及其衍生物	Amino acids and derivatives	氨基酸及其衍生物	C10H21N3O4	2	0.7081	23161-31-1	107824	47757.1	172583	47837.2	7170.53	1293.25	1.08995	0.114006	0.266901	5.82875	2.54319	up	-	-
MW0013395	1-hexadecanoyl-2-(5Z,8Z,11Z,14Z-eicosatetraenoyl)-sn-glycero-3-phosphoethanolamine	2-花生四烯酰基-1-棕榈酰基-sn-甘油-3-磷酸乙醇胺	GP	甘油磷脂类	PE	磷脂酰乙醇胺	C41H74NO8P	2	0.7077	70812-59-8	20864.2	17183	31686.4	73812.5	45168.9	65154	1.29876	0.0282652	0.140311	0.378708	-1.40084	down	-	-
MEDN0031	Pyroglutamic acid	L-焦谷氨酸	Amino acids and derivatives	氨基酸及其衍生物	Amino acids and derivatives	氨基酸及其衍生物	C5H7NO3	3	0.9993	98-79-3	38636.9	34186	32768.6	76179.1	92821.9	89208.9	1.42254	0.0051697	0.078477	0.408937	-1.29005	down	C01879	ko00480,ko01100
MEDN0551	3-Indoleacrylic acid	3-吲哚丙烯酸	Alkaloids	生物碱	Plumerane	吲哚类生物碱	C11H9NO2	3	0.9944	29953-71-7	8980.02	5888.2	7333.25	13570.9	19442.1	16204	1.33998	0.0179067	0.118527	0.451094	-1.1485	down	-	-
MEDN0017	D-Pyroglutamic acid	D-焦谷氨酸	Amino acids and derivatives	氨基酸及其衍生物	Amino acids and derivatives	氨基酸及其衍生物	C5H7NO3	3	0.9848	4042-36-8	43723.6	50626.4	31902.5	85598.1	114176	113666	1.36064	0.00883479	0.0898959	0.402796	-1.31188	down	C02237	ko00470,ko01100
MW0009481	Piretanide	吡咯他尼	Benzene and substituted derivatives	苯及其衍生物	Benzene and substituted derivatives	苯及其衍生物	C17H18N2O5S	3	0.9781	55837-27-9	59350.1	63784.1	42309.6	12680.6	13944.4	16333.2	1.4064	0.0223542	0.129344	3.85127	1.94533	up	-	-
MEDL01970	Corilagin	鞣料云实素	Tannins	鞣质	Tannin	鞣质	C27H22O18	3	0.9778	23094-69-1	2.17948e+06	1.57829e+06	2.03466e+06	508171	517600	136803	1.28429	0.0033429	0.0680309	4.98241	2.31685	up	C10219	-
FDATN01519	D-phenylalanine	D-苯丙氨酸	Amino acids and derivatives	氨基酸及其衍生物	Amino acids and derivatives	氨基酸及其衍生物	C9H11NO2	3	0.9771	673-06-3	87176.8	121099	110323	264996	385545	366874	1.39462	0.0192329	0.123091	0.313145	-1.6751	down	C02265	ko00360,ko00470,ko01100
MEDN0198	Citric acid	柠檬酸	Organic acids	有机酸	Organic acids	有机酸	C6H8O7	3	0.9695	77-92-9	6.69281e+06	1.02515e+07	1.12763e+07	3.47302e+06	3.48708e+06	3.54148e+06	1.37159	0.0510668	0.176982	2.68727	1.42614	up	C00158	ko00020,ko00250,ko00630,ko01100,ko01110,ko01200,ko01210,ko01230,ko01240
MEDN0627	Ellagic acid	鞣花酸	Tannins	鞣质	Tannin	鞣质	C14H6O8	3	0.9676	476-66-4	1.50548e+06	1.78275e+06	1.85779e+06	279811	384342	227822	1.41879	0.00191207	0.0630331	5.76924	2.52838	up	C10788	-
MEDL02380	Phthalic acid	邻苯二甲酸	Phenolic acids	酚酸类	Phenolic acids	酚酸类	C8H6O4	3	0.9634	88-99-3	24998.6	38519.1	33128.3	11800.2	13494.7	15320.5	1.3644	0.0346332	0.152032	2.37954	1.25068	up	C01606	ko01100,ko02010
MEDN1060	(±)-erythro-Isoleucine	L-别异亮氨酸	Amino acids and derivatives	氨基酸及其衍生物	Amino acids and derivatives	氨基酸及其衍生物	C6H13NO2	3	0.96	443-79-8	16953.9	14953.8	13795.5	50502.5	99178	74787.1	1.39669	0.0507956	0.176982	0.203608	-2.29614	down	C16434	-
MEDL02580	Cinnamtannin B2	肉桂单宁 B2	Tannins	鞣质	Tannin	鞣质	C60H48O24	3	0.9597	88038-12-4	1.12878e+06	914480	1.20881e+06	403567	316488	294262	1.41128	0.00717556	0.0829653	3.20617	1.68085	up	C17629	-
MEDL02577	Procyanidin C1	原花青素 C1	Tannins	鞣质	Proanthocyanidins	原花青素	C45H38O18	3	0.9563	37064-30-5	1.11951e+07	1.16226e+07	1.22507e+07	5.67029e+06	3.97422e+06	3.17427e+06	1.37129	0.00412691	0.0725502	2.73571	1.45192	up	C17624	-
MEDL02155	Threonic acid	D-苏糖酸	Others	其它类	Saccharides	糖类	C4H8O5	3	0.949	3909-12-4	108257	123023	168599	384308	318748	434062	1.37769	0.00687189	0.0823916	0.351661	-1.50774	down	C21649	-
MEDN0203	cis-Aconitic acid	顺式乌头酸	Organic acids	有机酸	Organic acids	有机酸	C6H6O6	3	0.9355	585-84-2	129742	166007	164773	38476.1	40872.6	45540.8	1.42815	0.00944283	0.0924361	3.68744	1.88262	up	C00417	ko00020,ko00630,ko00660,ko01100,ko01110,ko01210
MADN0588	5-Carboxyvanillic acid	5-羧香草酸	Organic acids	有机酸	Organic acids	有机酸	C9H8O6	3	0.9317	2134-91-0	116221	91479.2	101856	43117.2	50809.7	30834.7	1.36109	0.00304277	0.0680309	2.48118	1.31103	up	C18338	-
MW0156419	Robinetinidol-(4alpha->8)-catechin-(6->4alpha)-robinetinidol	刺槐烯醇-(4α->8)-儿茶素-(6->4α)-刺槐烯醇	Flavonoids	黄酮	Flavones	黄酮	C45H38O18	3	0.9285	85820-29-7	1.5789e+06	1.05933e+06	1.35823e+06	814298	754306	275430	1.10042	0.0351044	0.152228	2.16723	1.11586	up	-	-
MEDN0383	FFA(18:2)	亚麻酸	Lipids	脂质	Free fatty acids	游离脂肪酸	C18H32O2	3	0.92	60-33-3	565874	412483	503329	1.02645e+06	1.13642e+06	1.02584e+06	1.39782	0.000707421	0.0506524	0.464666	-1.10573	down	C01595	ko00591,ko01040,ko01100
MEDN0533	Xanthosine	黄苷	Nucleotides and derivatives	核苷酸及其衍生物	Nucleotides and derivatives	核苷酸及其衍生物	C10H12N4O6	3	0.9119	146-80-5	18486.2	18735.1	17211.7	37142.5	35687	52789.6	1.37927	0.0483704	0.173678	0.433318	-1.2065	down	C01762	ko00230,ko00232,ko01100,ko01110,ko01232,ko02010
MEDL02262	Trehalose-6-phosphate	海藻糖-6-磷酸	Others	其它类	Saccharides	糖类	C12H23O14P	3	0.9094	4484-88-2	83963.8	131704	116030	267245	259861	311313	1.37748	0.00148261	0.0587974	0.395623	-1.3378	down	C00689	ko00500,ko01100,ko01110
MW0132666	Isolimocitrol	3,5,7-三羟基-2-(3-羟基-4-甲氧基苯基)-6,8-二甲氧基-4H-铬-4-酮	Others	其它类	Ketone compounds	酮类化合物	C18H16O9	3	0.9028	1171-97-7	151377	212415	185235	33447	42023.1	33653.7	1.42596	0.0125274	0.103984	5.03123	2.33091	up	-	-
MEDL02576	Eicosadienoic acid	二十碳二烯酸	Lipids	脂质	Free fatty acids	游离脂肪酸	C20H36O2	3	0.9016	5598-38-9	4823.21	8718.37	7785.43	10714.1	21607.4	12825.4	1.14961	0.128534	0.282492	0.472391	-1.08195	down	C16525	ko01040
MEDP2069	Bis(2-butoxyethyl) phthalate	邻苯二甲酸二丁氧基乙酯	Benzene and substituted derivatives	苯及其衍生物	Benzene and substituted derivatives	苯及其衍生物	C20H30O6	3	0.9012	117-83-9	12283.1	18682	16371.4	5370.28	8274.57	7075	1.32642	0.0265935	0.13743	2.2846	1.19194	up	-	-
MW0137673	Cinnamtannin D2	肉桂单宁D2	Heterocyclic compounds	杂环化合物	Heterocyclic compounds	杂环化合物	C60H48O24	3	0.8996	97233-47-1	2.22642e+06	1.9925e+06	2.60244e+06	751704	695467	512390	1.40968	0.00551963	0.0790937	3.48106	1.79953	up	C17633	-
MW0133983	5,6-Dihydroxyflavone	5,6-Dihydroxyflavone	Others	其它类	Ketone compounds	酮类化合物	C15H10O4	3	0.895	6665-66-3	6267.12	10626.7	11017.5	26712.2	47512.7	20355.7	1.27717	0.108885	0.261105	0.295106	-1.76069	down	-	-
MEDN1035	13R-hydroxy-9Z,11E-octadecadienoic acid	13-羟基十八烷基-9,11-二烯酸	Lipids	脂质	Free fatty acids	游离脂肪酸	C18H32O3	3	0.8921	10219-69-9	2382.43	706.37	2427.07	2602.55	4363.22	8816.83	1.01109	0.198693	0.359551	0.349491	-1.51667	down	-	-
MEDL02390	Procyanidin B3	原花青素 B3	Tannins	鞣质	Proanthocyanidins	原花青素	C30H26O12	3	0.8875	23567-23-9	1.87379e+07	1.62945e+07	1.95481e+07	1.09679e+07	6.92629e+06	4.87304e+06	1.28182	0.012787	0.104116	2.39733	1.26143	up	-	-
MEDL01821	3-Furoic acid	3-糠酸	Organic acids	有机酸	Organic acids	有机酸	C5H4O3	3	0.8871	488-93-7	267584	346247	392985	138651	136020	150216	1.39353	0.032251	0.147724	2.36961	1.24465	up	-	-
MW0122967	Aurasperone D	金曲酮D	Others	其它类	Ketone compounds	酮类化合物	C31H24O10	3	0.8864	67924-64-5	27033.1	23583.3	17812.2	2735.16	2888.51	3320.39	1.42802	0.017571	0.117817	7.65073	2.9356	up	C08995	-
MEDN0463	D-Fructose 6-Phosphate-Disodium Salt	D-果糖-6-磷酸二钠盐	Others	其它类	Saccharides	糖类	C6H13O9P	3	0.8852	26177-86-6	34317.6	30163.7	31654.4	65593.5	71147.4	92561.1	1.39786	0.0303567	0.145361	0.419254	-1.2541	down	-	-
MEDP1592	Citicoline	胞磷胆碱	Nucleotides and derivatives	核苷酸及其衍生物	Nucleotides and derivatives	核苷酸及其衍生物	C14H26N4O11P2	3	0.8722	987-78-0	144061	158918	203097	91991.9	103623	48094	1.20103	0.0234687	0.13157	2.07656	1.0542	up	C00307	ko00564,ko01100
MW0146512	Bacopasaponin C	狗头皂苷C	Terpenoids	萜类	Triterpene Saponin	三萜皂苷	C46H74O17	3	0.8703	178064-13-6	69359.2	39828.7	38381.3	6061.02	9205.6	4091.84	1.38207	0.0487814	0.174491	7.62298	2.93036	up	-	-
MEDL00331	3'-Aenylic Acid	腺苷-3'-磷酸	Nucleotides and derivatives	核苷酸及其衍生物	Nucleotides and derivatives	核苷酸及其衍生物	C10H14N5O7P	3	0.8605	84-21-9	17989	38937.6	14741.1	48440.6	57247.1	80349.7	1.2157	0.0374809	0.156775	0.385233	-1.3762	down	C01367	ko00230,ko01100
MW0153976	Mulberrofuran C	桑呋喃C	Heterocyclic compounds	杂环化合物	Heterocyclic compounds	杂环化合物	C34H28O9	3	0.8492	77996-04-4	136184	168847	141805	20076.3	23697.6	19292.8	1.43601	0.00546889	0.0790937	7.08512	2.82479	up	C08928	-
MEDL01969	Granatin A	石榴皮苦素 A	Tannins	鞣质	Tannin	鞣质	C34H24O22	3	0.8417	73683-70-2	203954	219145	250595	40005.8	61885.7	24223.7	1.37552	0.000620612	0.0506524	5.3419	2.41735	up	-	-
MW0141227	10-Hydroxydihydrosanguinarine	10-羟基二氢血根碱	Alkaloids	生物碱	Alkaloids	生物碱	C20H15NO5	3	0.84	131984-76-4	23739.7	17551.3	26803.2	8090.61	8843.49	14433.4	1.26394	0.0257456	0.136464	2.17085	1.11826	up	C05247	ko00950,ko01100,ko01110
MEDL02583	Procyanidin B4	原花青素 B4	Tannins	鞣质	Proanthocyanidins	原花青素	C30H26O12	3	0.8395	4852-22-6	419569	342613	375111	140459	178298	97491.6	1.35789	0.00175324	0.0620995	2.73224	1.45009	up	C10238	-
MEDP0899	3-Methyladenine	3-甲基腺嘌呤	Nucleotides and derivatives	核苷酸及其衍生物	Nucleotides and derivatives	核苷酸及其衍生物	C6H7N5	3	0.8328	5142-23-4 | 60192-57-6	96611.5	95760.6	119265	31515.9	31847	23919.6	1.42026	0.00587082	0.0805574	3.57044	1.8361	up	C00913	-
MEDN1197	8-Methoxyalkynurate	8-甲氧基炔脲酸酯	Organic acids	有机酸	Organic acids	有机酸	C11H9NO4	3	0.8122	2929-14-8	193148	108794	145727	55094.9	70508.7	83490.5	1.26413	0.0703086	0.206267	2.14099	1.09828	up	C05830	ko00380
MW0134235	Arachidin-1	5-[（E)-2-(3，4-二羟基苯基）乙烯基]-2-[（1E)-3-甲基丁-1-烯-1-基]苯-1，3-二醇	Benzene and substituted derivatives	苯及其衍生物	Benzene and substituted derivatives	苯及其衍生物	C19H20O4	3	0.8031	98391-38-9	75649.7	135695	109117	296845	300564	641533	1.3068	0.112497	0.265641	0.258658	-1.95088	down	-	-
MEDN1160	Mevalonate 5-phosphate	甲戊酸 5-磷酸酯	Organic acids	有机酸	Organic acids	有机酸	C6H13O7P	3	0.8014	73566-35-5	78111.9	47019	74157.8	307519	271153	228276	1.39518	0.00562347	0.0790937	0.246966	-2.01761	down	C01107	ko00900,ko01100,ko01110
MW0139418	Procyanidin B5	原花青素 B5	Tannins	鞣质	Proanthocyanidins	原花青素	C30H26O12	3	0.7981	12798-57-1	6.34184e+06	5.73328e+06	6.56229e+06	4.19661e+06	2.45984e+06	770592	1.08217	0.055938	0.183972	2.5094	1.32734	up	C17640	-
MEDL01971	beta-D-Glucopyranose, cyclic 4,6-((1S)-4,4',5,5',6,6'-hexahydroxy(1,1'-biphenyl)-2,2'-dicarboxylate) 1,2,3-tris(3,4,5-trihydroxybenzoate)	特里马素 II	Tannins	鞣质	Tannin	鞣质	C41H30O26	3	0.7978	58970-75-5	84362.3	41022.8	45175.1	11493.8	12915.7	5984.22	1.34651	0.0741155	0.211917	5.61168	2.48843	up	C10224	-
MW0151998	Kandelin A-1	Kandelin?A-1；金鸡纳碱-1a-(4beta->8)-儿茶素	Flavonoids	黄酮	Flavones	黄酮	C39H32O15	3	0.7924	88903-77-9	27638.2	21397.1	29449.5	7655.7	8260.12	1385.76	1.20019	0.00354051	0.0693164	4.53628	2.18151	up	-	-
MW0147339	Cercosporin	尾孢菌素	Others	其它类	Others	其它	C29H26O10	3	0.7908	35082-49-6	111664	104620	113254	48074.2	24562.2	36984.7	1.36417	0.00378398	0.0716239	3.00616	1.58792	up	-	-
MW0156350	Rehmaionoside C	地黄苷C	Terpenoids	萜类	Terpene	萜类	C19H32O8	3	0.79	104112-05-2	1.00118e+06	818647	712442	2.0135e+06	1.87655e+06	1.94716e+06	1.4056	0.00167908	0.0608665	0.433816	-1.20484	down	C17452	-
MEDN0092	3,4-Dihydroxybenzeneacetic acid	3,4-二羟基苯乙酸	Phenolic acids	酚酸类	Phenolic acids	酚酸类	C8H8O4	3	0.7845	102-32-9	10619	8362.75	8353.66	15970.2	19039.3	22469.4	1.36686	0.0212852	0.126559	0.475574	-1.07226	down	C01161	ko00350,ko01100
MW0144376	Adiantifoline	阿地安托林	Alkaloids	生物碱	Alkaloids	生物碱	C42H50N2O9	3	0.7819	20823-96-5	71567.3	86080.3	44292.9	189959	163669	96923.6	1.1804	0.0786383	0.21784	0.448208	-1.15776	down	C09323	-
MW0123014	Azactam	Aztreonam	Heterocyclic compounds	杂环化合物	Heterocyclic compounds	杂环化合物	C13H17N5O8S2	3	0.7809	78110-38-0	25510.3	7941.3	34802.4	8245.86	6398.6	2374.11	1.09023	0.157044	0.316957	4.01056	2.0038	up	C06840	-
MW0149164	Fetidine	非替丁	Alkaloids	生物碱	Alkaloids	生物碱	C40H46N2O8	3	0.779	7072-86-8	9385.55	1349.51	2413.81	16039.2	19077.3	19279.5	1.20686	0.0198136	0.124404	0.241725	-2.04856	down	C09441	-
MW0142720	3,5-Dinitro-L-tyrosine	3,5-二硝基-L-酪氨酸	Amino acids and derivatives	氨基酸及其衍生物	Amino acids and derivatives	氨基酸及其衍生物	C9H9N3O7	3	0.7762	17360-11-1	54426.2	49118.8	50539.9	126481	107786	161506	1.39615	0.0349931	0.152228	0.389326	-1.36095	down	C03225	-
MW0134489	Calycopterin	5-羟基-2-(4-羟基苯基)-3,6,7,8-四甲氧基-4H-铬-4-酮	Others	其它类	Ketone compounds	酮类化合物	C19H18O8	3	0.7683	481-52-7	189722	184864	217271	32530.2	13957.5	36589.1	1.38216	0.000322885	0.0453996	7.12423	2.83273	up	-	-
MW0112119	2-Dodecenal	2-十二烯醛	Others	其它类	Aldehyde compounds	醛类化合物	C12H22O	3	0.7661	4826-62-4	9303.95	26679	20588.2	54800.5	66323.6	74433.3	1.28991	0.00388553	0.0721587	0.289282	-1.78945	down	-	-
MEDN0300	Azelaic acid	壬二酸	Organic acids	有机酸	Organic acids	有机酸	C9H16O4	3	0.7636	123-99-9	557684	510226	583009	202507	189490	188568	1.43801	0.00254747	0.0669726	2.84364	1.50774	up	C08261	-
MW0141698	1-{[3-(3,4-Dihydroxyphenyl)acryloyl]oxy}-3,5-dihydroxycyclohexane-1-carboxylic acid	1-{[3-(3,4-二羟基苯基)丙烯酰基]氧基}-3,5-二羟基环己烷-1-羧酸	Organic acids	有机酸	Organic acids	有机酸	C16H18O8	3	0.7609	153444-59-8	1.53645e+06	1.18757e+06	1.06777e+06	2.58904e+06	2.89989e+06	3.46721e+06	1.37763	0.0089876	0.0906575	0.423373	-1.24	down	-	-
MW0152007	Karwinskione	卡尔温斯基奥内	Lignans and Coumarins	木脂素和香豆素	Lignans	木脂素	C32H32O7	3	0.7586	59481-46-8	20919	24642.3	31001.6	105717	137665	142230	1.41775	0.00879514	0.0896911	0.198549	-2.33243	down	C09944	-
MW0012946	Lysophosphatidic acid	磷脂酸(18:1/0:0)	Lipids	脂质	Glycerol ester	甘油酯	C21H41O7P	3	0.7577	65528-98-5	36636.7	32432.2	30751.4	7546.25	23718.9	16224.7	1.11963	0.0509154	0.176982	2.10193	1.07171	up	-	-
MW0169251	Harmine	去氢骆驼蓬碱	Alkaloids	生物碱	Alkaloids	生物碱	C13H12N2O	3	0.7551	442-51-3	249203	114751	101303	596829	522263	514189	1.32993	0.00476757	0.0765451	0.28486	-1.81167	down	C06538	ko00901
MW0157212	Sterculic acid	石桐酸	Lipids	脂质	Free fatty acids	游离脂肪酸	C19H34O2	3	0.7539	738-87-4 | 55088-60-3	850.23	774.21	782.33	1688.06	2652.58	2191.22	1.39253	0.03779	0.156979	0.368466	-1.4404	down	C08366	-
MW0158061	Trilobine	三叶草碱	Lignans and Coumarins	木脂素和香豆素	Lignans	木脂素	C35H34N2O5	3	0.7494	6138-73-4	16444.7	21898.5	21157.3	3649.16	6924.45	6346.57	1.36491	0.0043099	0.073561	3.51654	1.81416	up	C09669	-
MEDL01875	[10]-Shogaol	[10]-姜烯酚	Phenolic acids	酚酸类	Phenolic acids	酚酸类	C21H32O3	3	0.7476	36752-54-2	4048.56	7011.67	5544.93	14072.7	16510.4	39406.9	1.27641	0.156795	0.316592	0.237251	-2.07552	down	-	-
MW0127210	2-(Ethylsulfonyl)ethanol	2-(乙基磺酰基)乙醇	Alcohol and amines	醇、胺类	Alcohols	醇类	C4H10O3S	3	0.746	513-12-2	4204.63	9342.81	9006.19	154.49	2031.42	2949.22	1.03374	0.0536334	0.181451	4.39203	2.13489	up	-	-
MW0010764	d-Camphorsulfonic acid	d-樟脑磺酸	Organic acids	有机酸	Organic acids	有机酸	C10H16O4S	3	0.7456	3144-16-9	375.72	574.73	337.04	5776.11	6925.59	906.36	1.2114	0.155724	0.315667	0.0946123	-3.40183	down	-	-
MW0133443	1-(4-Hydroxyphenyl)-1,2-diphenyl-1-butene	4-[（1E)-1,2-二苯基-1-烯-1-基]苯酚	Benzene and substituted derivatives	苯及其衍生物	Benzene and substituted derivatives	苯及其衍生物	C22H20O	3	0.7416	68684-63-9	49411.1	77264.3	63717.9	25835.9	23278.8	23576	1.38906	0.0383546	0.157352	2.61922	1.38914	up	-	-
MW0146836	Botrydial	Botrydial	Others	其它类	Lactones	内酯类化合物	C17H26O5	3	0.7402	54986-75-3	1.12303e+07	6.67564e+06	8.02991e+06	2.57694e+07	1.36803e+07	3.7326e+07	1.21437	0.126152	0.280456	0.337813	-1.5657	down	C09622	-
MW0054026	1-O-Acetylbritannilactone	1-O-乙酰旋覆花内酯	Others	其它类	Lactones	内酯类化合物	C17H24O5	3	0.7387	33627-41-7	7283.64	11397.9	8681.92	24998.9	20870.2	18803.7	1.35914	0.00713656	0.0829653	0.423107	-1.24091	down	-	-
MW0137810	Cyanidin 3-O-[b-D-Xylopyranosyl-(1->2)-[(4-hydroxybenzoyl)-(->6)-b-D-glucopyranosyl-(1->6)]-b-D-galactopyranoside]	花青素 3-O-[bD-吡喃木糖基-(1->2)-[(4-羟基苯甲酰基)-(->6)-bD-吡喃葡萄糖基-(1->6)]-bD-吡喃半乳糖苷]	Flavonoids	黄酮	Anthocyanidins	花青素	C39H43O22+	3	0.7385	142506-20-5	34392.7	38220.5	23243.7	86961.8	65664.5	68513.5	1.33802	0.00935349	0.0922803	0.433467	-1.20601	down	-	-
MW0140108	(+)-Elaeocarpine	（-)-杜英碱	Heterocyclic compounds	杂环化合物	Heterocyclic compounds	杂环化合物	C16H19NO2	3	0.7381	30891-90-8	49394.3	38619.1	36736.9	144354	124530	96528.2	1.39062	0.0218832	0.128121	0.341395	-1.55048	down	C10591	-
MW0140522	(E)-2-(2-Furyl)-3-(5-nitro-2-furyl)acrylamide	（E)-2-(2-呋喃基)-3-(5-硝基-2-呋喃基）丙烯酰胺	Alcohol and amines	醇、胺类	Amines	胺类	C11H8N2O5	3	0.7373	3688-53-7 | 18819-45-9	71586.7	67531.1	84782.9	283105	238382	76040.9	1.02079	0.185496	0.344418	0.374712	-1.41614	down	C04621	-
MW0105992	Austin	奥斯汀	Heterocyclic compounds	杂环化合物	Heterocyclic compounds	杂环化合物	C27H32O9	3	0.732	61103-89-7	76955.9	212577	103004	298794	430256	562095	1.25846	0.0387353	0.157659	0.304022	-1.71775	down	-	-
MW0147045	Canaliculatol	小管醇	Heterocyclic compounds	杂环化合物	Heterocyclic compounds	杂环化合物	C42H32O9	3	0.7297	114488-83-4	10956.3	10860.7	11329.3	39937.7	31873	61332.8	1.38752	0.0629969	0.194223	0.248952	-2.00606	down	C10249	-
FDATN01055	Midodrine	米多君	Benzene and substituted derivatives	苯及其衍生物	Benzene and substituted derivatives	苯及其衍生物	C12H18N2O4	3	0.7228	133163-28-7	16494.5	32193.4	38718.2	9984.88	8615.14	11177.3	1.27951	0.0986291	0.247047	2.93533	1.55352	up	C07890	-
MW0144837	Alangimarine	阿兰吉马林	Heterocyclic compounds	杂环化合物	Heterocyclic compounds	杂环化合物	C19H16N2O3	3	0.7203	77156-16-2	81751.9	174217	162008	39863.5	31263.6	40141.6	1.3423	0.0704833	0.206597	3.75646	1.90937	up	C09329	-
MEDN0683	2-Naphthol	2-萘酚	Phenolic acids	酚酸类	Phenolic acids	酚酸类	C10H8O	3	0.7119	135-19-3	31103.3	74035.3	61146.1	22152.5	16579.2	23451.9	1.23389	0.108459	0.260481	2.67409	1.41905	up	C11713	-
MW0138082	Epigallocatechin-(4beta->8)-epicatechin-3-O-gallate ester	表没食子儿茶素-(4BETA->8)-表儿茶素3-O-没食子酸酯	Flavonoids	黄酮	Flavanols	黄烷醇类	C37H30O17	3	0.7097	126715-82-0	91294.3	91944.8	131410	49033	51836.3	25422.1	1.26962	0.0223816	0.129344	2.49146	1.31699	up	C10223	-
MEDL02579	Cinnamtannin A2	肉桂单宁 A2	Tannins	鞣质	Tannin	鞣质	C60H50O24	3	0.7093	86631-38-1	1.7273e+06	1.45309e+06	2.00092e+06	906911	461644	457677	1.31869	0.00682837	0.0823916	2.83717	1.50445	up	C17625	-
MW0114030	Caffeic acid 3-glucoside	咖啡酸-3-葡萄糖苷	Phenolic acids	酚酸类	Phenolic acids	酚酸类	C15H18O9	3	0.709	24959-81-7	114453	114185	80562.6	5952.46	22722.6	25535.9	1.28473	0.00637594	0.0818674	5.70364	2.51188	up	C10431	-
MW0015761	Ampeloside Bs1	Ameloside Bs1	Steroids	甾体	Steroid	甾体	C45H74O20	3	0.7076	118524-12-2	15446.8	15779.5	20469.7	9490.58	6545.69	6157.12	1.3521	0.010516	0.0975246	2.32934	1.21992	up	-	-
MEDN1616	Val-Pro-Leu	缬氨酸-脯氨酸-亮氨酸	Amino acids and derivatives	氨基酸及其衍生物	Amino acids and derivatives	氨基酸及其衍生物	C16H29N3O4	3	0.7003	90614-49-6	34486.4	58046.9	48419.3	112631	118206	189756	1.33198	0.0553929	0.183778	0.335128	-1.57721	down	-	-
MEDL01744	Heterophylliin A	1,3-二-O-没食子酰-4,6-(S)-六羟基二苯甲酰基-β-D-葡萄糖; 榛子素 A	Tannins	鞣质	Tannin	鞣质	C34H26O22	3	0.6988	87687-52-3	142168	217752	210384	26615.7	39310.4	89908.6	1.26727	0.0122198	0.103238	3.65967	1.87171	up	-	-
MW0001861	2-Pyridin-3-yl-2,3-dihydro-1H-perimidine	2-Pyridin-3-yl-2,3-dihydro-1H-perimidine	Benzene and substituted derivatives	苯及其衍生物	Benzene and substituted derivatives	苯及其衍生物	C16H13N3	3	0.6942	6584-41-4	21846.9	32343.5	28948.8	5324.42	4754.58	7871.46	1.40012	0.0134458	0.106312	4.63159	2.21151	up	-	-
MW0148141	Dalpanin	达尔帕宁	Lignans and Coumarins	木脂素和香豆素	Lignans	木脂素	C26H30O12	3	0.6938	37376-13-9	199025	216032	155995	479260	265658	459268	1.24377	0.0817918	0.22285	0.474223	-1.07636	down	C10416	-
MEDL01929	Caffeoylmalic Acid	2-O-咖啡酰苹果酸	Phenolic acids	酚酸类	Phenolic acids	酚酸类	C13H12O8	3	0.6918	53755-04-7	448210	538112	473540	184437	189192	229039	1.4148	0.00239941	0.0669726	2.42233	1.2764	up	-	-
MW0130129	[2-(3,4-dihydroxyphenyl)-3,7-dihydroxy-3,4-dihydro-2H-chromen-5-yl] 3,4,5-trihydroxybenzoate	2-(3，4-二羟基苯基)-3，7-二羟基-3，4-二氢-2H-1-苯并吡喃-5-基3，4，5-三羟基苯甲酸酯	Benzene and substituted derivatives	苯及其衍生物	Benzene and substituted derivatives	苯及其衍生物	C22H18O10	3	0.6911	128232-62-2	224946	283916	222768	83119.9	132040	66339.5	1.3197	0.00593087	0.0805574	2.59904	1.37798	up	-	-
MEDL01790	Cinnamtannin B1	肉桂单宁 B1	Tannins	鞣质	Tannin	鞣质	C45H36O18	3	0.6907	88082-60-4	1.58871e+06	2.3482e+06	2.19351e+06	838990	833160	421042	1.30911	0.0126399	0.104116	2.92874	1.55028	up	C17631	-
MW0049205	Deltaline	翠雀它灵	Alkaloids	生物碱	Terpenoid alkaloids	萜类生物碱	C27H41NO8	3	0.6887	6836-11-9	47654.8	43548.8	40116.2	91460.2	77558.5	100814	1.39954	0.013938	0.108164	0.486672	-1.03898	down	C08679	-
MW0112710	3,4-Di-O-galloylquinic acid	3,4-二-O-没食子酰奎宁酸	Organic acids	有机酸	Organic acids	有机酸	C21H20O14	3	0.6884	86687-37-8	6260.46	6447.35	8215.63	497.76	1800.12	270.49	1.30651	0.00190381	0.0630331	8.14658	3.0262	up	-	-
MW0152041	Knipholone	克尼福隆	Benzene and substituted derivatives	苯及其衍生物	Benzene and substituted derivatives	苯及其衍生物	C24H18O8	3	0.6871	94450-08-5	7076.84	14990	6352.53	5362.38	2434.47	3998.98	1.1057	0.175217	0.33457	2.40927	1.2686	up	-	-
MW0108670	N-Acryloylglycine	N-丙烯酰基甘氨酸	Amino acids and derivatives	氨基酸及其衍生物	Amino acids and derivatives	氨基酸及其衍生物	C5H7NO3	3	0.6866	24599-25-5	185065	223343	217721	105232	96980.5	90103.6	1.4172	0.00591488	0.0805574	2.14196	1.09893	up	-	-
MW0118077	1h-Benzimidazole, 2-[(2,2-diethoxyethyl)thio]-	1h-苯并咪唑，2-[(2,2-二乙氧基乙基)硫代]-	Benzene and substituted derivatives	苯及其衍生物	Benzene and substituted derivatives	苯及其衍生物	C13H18N2O2S	3	0.6857	46911-49-3	3343.9	5334.01	5043.22	860.31	1752.03	439.25	1.28094	0.0127901	0.104116	4.49639	2.16877	up	-	-
mws0895	Genistin	染料木苷(金雀异黄苷)	Flavonoids	黄酮	Isoflavones	异黄酮	C21H20O10	3	0.6856	529-59-9	323741	673279	422126	1.47684e+06	957398	762639	1.17913	0.0906917	0.23641	0.443916	-1.17164	down	C09126	ko00943
MW0142469	2-Methylaminoadenosine	2-甲基氨基腺苷	Nucleotides and derivatives	核苷酸及其衍生物	Nucleotides and derivatives	核苷酸及其衍生物	C11H16N6O4	3	0.683	13364-95-9	25641.9	19086.8	28593	11167.7	6060.43	5945.76	1.33978	0.0115458	0.101883	3.16397	1.66174	up	C03218	-
MEDL02260	Gallocatechin gallate	没食子儿茶素没食子酸酯	Flavonoids	黄酮	Flavanols	黄烷醇类	C22H18O11	3	0.6824	5127-64-0	2166.96	681.28	3150.64	56422.3	57202.9	7236.23	1.2432	0.146213	0.302851	0.0496343	-4.33252	down	-	-
MEDL02741	Xanthoxylin	花椒油素;秦椒素	Phenolic acids	酚酸类	Phenolic acids	酚酸类	C10H12O4	3	0.6821	90-24-4	37754.9	47591.2	42932.5	1872.72	8668.93	4999.25	1.34005	0.000742242	0.0506524	8.25426	3.04514	up	C10726	-
MW0107564	Ile-gly	异亮氨酸甘氨酸	Amino acids and derivatives	氨基酸及其衍生物	Amino acids and derivatives	氨基酸及其衍生物	C8H16N2O3	3	0.682	868-28-0	15312.7	25590.5	15942.5	25126.6	58875.3	53840.2	1.15953	0.113204	0.266051	0.412397	-1.27789	down	-	-
MW0111715	Xylobiose	木二糖	Others	其它类	Saccharides	糖类	C10H18O9	3	0.68	6860-47-5 | 83113-52-4	108572	132530	110336	51139.3	37942.9	63580.3	1.34671	0.00346099	0.0691677	2.30206	1.20292	up	C01630	ko02010
MEDL02592	4',5,7-Trimethoxyflavone	4',5,7-四甲氧基黄酮	Flavonoids	黄酮	Flavones	黄酮	C18H16O5	3	0.6789	5631-70-9	5861.78	15696.4	12579.7	21822.3	16025.6	35946.4	1.04054	0.141329	0.29767	0.462607	-1.11214	down	-	-
MW0107182	Glycylmethionine	甘氨酰甲硫氨酸	Amino acids and derivatives	氨基酸及其衍生物	Amino acids and derivatives	氨基酸及其衍生物	C7H14N2O3S	3	0.6777	554-94-9	85535.4	106981	123794	37599.4	37999.5	35156.3	1.41349	0.0245119	0.133887	2.85594	1.51397	up	-	-
MEDP1652	Leucovorin	10-甲酰基-7,8-二氢叶酸	Heterocyclic compounds	杂环化合物	Pteridines and derivatives	蝶啶及其衍生物	C20H23N7O7	3	0.677	58-05-9 | 1492-18-8	43199.1	71861.1	44817.7	323490	236570	427903	1.39705	0.034788	0.152142	0.161826	-2.62749	down	-	-
MW0148692	D-Ribitol-5-phosphate	D-核糖醇-5-磷酸	Organic acids	有机酸	Organic acids	有机酸	C5H13O8P	3	0.6734	35320-17-3 | 3506-18-1 | 51584-96-4	17270.8	8346.32	9865.39	50875.9	48359.8	54402.7	1.38537	0.000668322	0.0506524	0.230948	-2.11436	down	C01068	ko00040,ko00515,ko01100
MW0155657	Ponalactone A	松内酯A	Others	其它类	Ketone compounds	酮类化合物	C19H22O6	3	0.6726	33722-77-9	140461	104557	118053	42878.1	36357.2	36350	1.4201	0.0129002	0.104473	3.14115	1.65129	up	C09174	-
MEDP0051	L-cystathionine	L-胱硫醚	Amino acids and derivatives	氨基酸及其衍生物	Amino acids and derivatives	氨基酸及其衍生物	C7H14N2O4S	3	0.6683	56-88-2	20352	37624.2	41423.6	8232.21	4144.69	9200.59	1.32564	0.0504252	0.176982	4.60664	2.20372	up	C02291	ko00260,ko00270,ko01100,ko01110,ko01230,ko01240
MW0114702	Lacto-N-tetraose	乳糖-N-四糖	Others	其它类	Saccharides	糖类	C26H45NO21	3	0.6673	14116-68-8	1.52192e+06	1.08208e+06	1.47951e+06	134948	573487	35077.5	1.17216	0.00730971	0.0833343	5.49219	2.45738	up	C06371	-
MW0000476	Usambarine	乌桑巴林	Alkaloids	生物碱	Alkaloids	生物碱	C30H34N4	3	0.6662	35226-29-0	3123.17	5096.36	6421.32	11923.3	11271.7	6232.96	1.09488	0.0927917	0.238931	0.497515	-1.00719	down	C09250	-
MW0169534	N-benzyl-1-methyl-1H-pyrazolo[3,4-d]pyrimidin-4-amine	N-苄基-1-甲基-1H-吡唑并[3,4-d]嘧啶-4-胺	Benzene and substituted derivatives	苯及其衍生物	Benzene and substituted derivatives	苯及其衍生物	C13H13N5	3	0.664	105903-56-8	11562.2	15696.4	18292.1	8450.4	3954.42	5533.43	1.27537	0.0225761	0.129531	2.5393	1.34443	up	-	-
MEDN1331	4-Methoxyphenylacetic acid	4-甲氧基苯乙酸	Organic acids	有机酸	Organic acids	有机酸	C9H10O3	3	0.6628	104-01-8	764107	670424	651295	1.45036e+06	1.28208e+06	1.51703e+06	1.41636	0.00292839	0.0679386	0.490844	-1.02666	down	-	-
MEDL01843	Matairesinol	罗汉松树脂醇	Lignans and Coumarins	木脂素和香豆素	Lignans	木脂素	C20H22O6	3	0.6561	580-72-3	162893	173909	156229	387582	385117	398410	1.43921	6.99859e-06	0.0129714	0.420994	-1.24813	down	C10682	ko00999,ko01100,ko01110
MEDP1470	Diethyl 2-methyl-3-oxosuccinate	甲基草酰乙酸二乙酯	Organic acids	有机酸	Organic acids	有机酸	C9H14O5	3	0.6543	759-65-9	72722.5	101424	103677	34786.3	45621.6	56174.5	1.29018	0.0226317	0.129531	2.03411	1.0244	up	C04067	-
MW0139483	Quercetin 3-(2-glucosylrhamnoside)	槲皮素3-(2-葡萄糖基鼠李糖苷）	Flavonoids	黄酮	Flavones	黄酮	C27H30O16	3	0.654	143016-74-4	16982.9	9026.2	11997	2716.51	1277.26	1862.28	1.3813	0.0401265	0.158914	6.49006	2.69823	up	-	-
MEDN0038	Oxiglutatione	氧化型谷胱甘肽	Amino acids and derivatives	氨基酸及其衍生物	Amino acids and derivatives	氨基酸及其衍生物	C20H32N6O12S2	3	0.6526	27025-41-8	37163.6	38017.7	37840.3	5214.63	8331.98	3753.96	1.40284	0.00128331	0.0554745	6.53283	2.70771	up	C00127	ko00480,ko01100,ko01240
MEDN1592	urolithin A	尿石素 A(鞣花单宁的肠道菌群代谢物)	Lignans and Coumarins	木脂素和香豆素	Coumarins	香豆素	C13H8O4	3	0.6521	1143-70-0	66054.1	56361	57704	27848.9	38164	16989.1	1.24594	0.0187667	0.121278	2.17006	1.11773	up	-	-
MW0142497	Naphthyl-2-methyl-succinic acid	2-萘基甲基丁二酸；2-甲基-2-萘丁二酸	Benzene and substituted derivatives	苯及其衍生物	Benzene and substituted derivatives	苯及其衍生物	C15H14O4	3	0.6516	350044-88-1	217947	240917	223817	55671.2	50547.2	67287.2	1.43033	7.56635e-05	0.0234053	3.93464	1.97623	up	C14115	-
MEDP1015	5,6-Dihydroxyindole-2-carboxylic acid	5,6-二羟基吲哚-2-羧酸	Alkaloids	生物碱	Plumerane	吲哚类生物碱	C9H7NO4	3	0.6505	4790-08-3	453432	446421	583807	193743	196168	163739	1.41339	0.016123	0.112789	2.67978	1.42211	up	C04185	ko00350,ko01100
MW0105404	Acesulfame potassium	安赛蜜钾	Heterocyclic compounds	杂环化合物	Heterocyclic compounds	杂环化合物	C4H4KNO4S	3	0.6487	55589-62-3	8345.3	10739.5	9256.26	4981.56	4913.65	3763.08	1.37444	0.00756064	0.0849427	2.07501	1.05312	up	-	-
MEDN1778	Lauryl glucoside	十二烷基葡萄糖苷	Others	其它类	Saccharides	糖类	C18H36O6	3	0.6476	59122-55-3 | 85618-22-0	37602.4	46763.8	45140.2	69267.6	107296	140001	1.28892	0.0900577	0.235208	0.409099	-1.28948	down	C16041	-
MW0119277	3-(2,3-Dioxo-1,2,3,4-tetrahydro-quinoxaline-6-sulfonyl)-propionic acid	3-(2,3-Dioxo-1,2,3,4-tetrahydro-quinoxaline-6-sulfonyl)-丙酸	Organic acids	有机酸	Organic acids	有机酸	C11H10N2O6S	3	0.644	436096-98-9	17411.8	27773.2	27126	3119.63	4187.45	4969.18	1.40642	0.0245139	0.133887	5.8903	2.55834	up	-	-
MW0133966	5,6,7-Trimethoxycoumarin	5，6，7-三甲氧基香豆素	Lignans and Coumarins	木脂素和香豆素	Coumarins	香豆素	C12H12O5	3	0.6429	55085-47-7	64969.9	35577.8	83852.8	22802.7	16765.3	24378.2	1.26747	0.0999444	0.249056	2.88368	1.52791	up	C09313	-
MEDN0506	N-Acetylglucosamine-1-phosphate	N-乙酰-D-葡萄糖胺-1-磷酸	Others	其它类	Saccharides	糖类	C8H16NO9P	3	0.6421	6866-69-9	10102.5	12500.2	13924.3	37146.9	31721.3	43639.4	1.40283	0.0117379	0.102424	0.324662	-1.62299	down	C04256	-
MEDN0610	2,3-Dinor-TXB2	2,3-二正凝血恶烷	Lipids	脂质	Free fatty acids	游离脂肪酸	C18H30O6	3	0.6366	63250-09-9	80048.4	119104	82043.9	368773	328250	416402	1.41286	0.00250965	0.0669726	0.252551	-1.98535	down	-	-
MW0063232	Cholest-7-en-6-one, 2,3,14,20,22,24,25-heptahydroxy-, (2beta,3beta,5beta,22R)-	Cholest-7-en-6-one, 2,3,14,20,22,24,25-heptahydroxy-, (2beta,3beta,5beta,22R)-	Steroids	甾体	Steroid	甾体	C27H44O8	3	0.6341	31385-31-6	1646.09	1813.17	708.58	4426.67	6019.48	5767.65	1.32656	0.00390845	0.0721587	0.257055	-1.95985	down	-	-
MW0115294	Glucosinalbin	氨基葡萄糖苷	Organic acids	有机酸	Organic acids	有机酸	C14H19NO10S2	3	0.6334	19253-84-0 | 20196-67-2	196452	316719	361203	63521.9	58752	78952.5	1.38995	0.0430187	0.165101	4.34522	2.11943	up	-	-
MEDL01949	Gossypol	棉酚	Terpenoids	萜类	Sesquiterpenoids	倍半萜	C30H30O8	3	0.6328	90141-22-3	512911	395737	511990	141079	152357	100899	1.40465	0.0061616	0.0818674	3.60261	1.84904	up	C07667	ko00909,ko01110
MW0150605	CID 5476509	货号 5476509	Benzene and substituted derivatives	苯及其衍生物	Benzene and substituted derivatives	苯及其衍生物	C37H44O10	3	0.6257	55306-11-1	47946.7	27253.5	14703.4	114445	123817	95976.1	1.29945	0.0033233	0.0680309	0.268981	-1.89443	down	-	-
MW0001650	1-Methyl-N-Phenyl-Indole-3-Carboxamide	1-甲基-N-苯基-吲哚-3-甲酰胺	Benzene and substituted derivatives	苯及其衍生物	Benzene and substituted derivatives	苯及其衍生物	C16H14N2O	3	0.621	82414-31-1	69.31	15.13	152.49	526.76	2179.28	1434.94	1.27743	0.111513	0.264529	0.0572159	-4.12744	down	-	-
MW0009174	N-phenyl-1H-pyrazole-3-carboxamide	N-苯基-1H-吡唑-3-甲酰胺	Benzene and substituted derivatives	苯及其衍生物	Benzene and substituted derivatives	苯及其衍生物	C10H9N3O	3	0.6187	124828-46-2	28188	34791.2	22444.8	10727.7	9792.29	13964.8	1.35115	0.0302256	0.14521	2.47715	1.30868	up	-	-
MW0054404	Loganin	马钱子苷;马钱素	Terpenoids	萜类	Monoterpenoids	倍萜	C17H26O10	3	0.6114	18524-94-2	6585.08	1418.17	3564.21	9036.92	6465.72	10479.5	1.03713	0.0686228	0.205824	0.445209	-1.16745	down	C01433	ko00902,ko01100,ko01110
MW0169507	N-1-Naphthylbenzamide	N-(萘-1-基）苯甲酰胺	Benzene and substituted derivatives	苯及其衍生物	Benzene and substituted derivatives	苯及其衍生物	C17H13NO	3	0.6113	634-42-4	21442.1	22027.9	18066.9	902.62	4829.3	6261.32	1.21414	0.00159493	0.0596812	5.13096	2.35923	up	-	-
MW0146376	Aspulvinone H	Aspulvinone H	Phenolic acids	酚酸类	Phenolic acids	酚酸类	C27H28O5	3	0.6085	57744-69-1	36891.1	27950.3	22362.5	67961.6	60631.1	62034	1.35603	0.00526346	0.078477	0.45746	-1.12828	down	C02008	-
MW0168807	Baicalin	黄芩苷	Flavonoids	黄酮	Flavones	黄酮	C21H18O11	3	0.6051	21967-41-9 | 31564-28-0	26545.9	51652.1	65302.7	23457.4	17763.1	18253.7	1.19305	0.128994	0.283028	2.41282	1.27072	up	C10025	-
MW0125007	Methoxybrassinin	甲氧基芸苔素	Heterocyclic compounds	杂环化合物	Heterocyclic compounds	杂环化合物	C12H14N2OS2	3	0.6042	105748-60-5	22842.6	42436.1	51528.6	6849.15	5488.86	6388.79	1.38993	0.0606498	0.190017	6.23744	2.64095	up	C08506	-
MW0108082	Lys-Tyr	L-赖氨酸-L-酪氨酸	Amino acids and derivatives	氨基酸及其衍生物	Amino acids and derivatives	氨基酸及其衍生物	C15H23N3O4	3	0.601	35978-98-4	6928.09	7998.5	10076.6	29806.8	34250	38864.5	1.41615	0.0052769	0.078477	0.242935	-2.04136	down	-	-
MW0157473	Thalidasine	沙利达辛	Lignans and Coumarins	木脂素和香豆素	Lignans	木脂素	C39H44N2O7	3	0.6005	16623-56-6	157954	118599	112521	43015.6	40508.9	33010	1.40746	0.0199936	0.124817	3.3387	1.73929	up	C09656	-
MW0129464	Angoletin	1-(2，4-二羟基-6-甲氧基-3，5-二甲基苯基)-3-苯基丙酮	Others	其它类	Ketone compounds	酮类化合物	C18H20O4	3	0.5977	76444-55-8	121368	57727.9	45050.3	439243	375256	451769	1.37167	0.000485537	0.0506524	0.177014	-2.49807	down	-	-
MW0149874	Glutaminyl-arginine	谷氨酰胺酰-精氨酸	Amino acids and derivatives	氨基酸及其衍生物	Amino acids and derivatives	氨基酸及其衍生物	C11H22N6O4	3	0.5976	126590-89-4	222011	237105	276389	487449	508735	481845	1.41458	0.000916679	0.0541062	0.497626	-1.00687	down	-	-
MW0112175	4-(Methylnitrosoamino)-1-(pyridin-3-YL)-1,2-butanedione 2-oxime	4-(甲基亚硝基氨基)-1-(吡啶-3-YL)-1,2-丁二酮2-肟	Others	其它类	Ketone compounds	酮类化合物	C10H12N4O3	3	0.5962	67351-31-9	15670.3	21725.4	15086.7	7771.12	8504.69	8398.39	1.37094	0.0471644	0.17244	2.12702	1.08883	up	-	-
MEDL02471	Flavin adenine dinucleotide	核黄素-5'-腺嘌呤二磷酸	Nucleotides and derivatives	核苷酸及其衍生物	Nucleotides and derivatives	核苷酸及其衍生物	C27H33N9O15P2	3	0.5898	146-14-5	7043.39	7044.14	6938.88	3469.69	3017.61	333.63	1.02584	0.0400134	0.158838	3.08263	1.62416	up	C00016	ko00740,ko01100,ko01110,ko01240
MW0154134	N-((4-(Acetylamino)phenyl)sulphonyl)acetamide	N-((4-(乙酰氨基)苯基)磺酰基)乙酰胺	Benzene and substituted derivatives	苯及其衍生物	Benzene and substituted derivatives	苯及其衍生物	C10H12N2O4S	3	0.588	5626-90-4 | 29591-86-4	75353.1	59056.9	62590.2	23281.5	26976.2	29951.4	1.40444	0.00843819	0.0877108	2.45608	1.29636	up	-	-
MW0114531	Glucobrassicanapin	葡甘蓝素	Organic acids	有机酸	Organic acids	有机酸	C12H21NO9S2	3	0.5833	19041-10-2	79271.5	145586	159009	2353.7	5015.52	2420.18	1.42079	0.0367772	0.155225	39.2125	5.29324	up	-	-
MW0105581	Alitame	爱丽甜	Organic acids	有机酸	Organic acids	有机酸	C14H25N3O4S	3	0.5825	80863-62-3	270175	175661	185247	87262.2	98600.9	83050.7	1.36131	0.0536202	0.181451	2.34679	1.23069	up	-	-
MW0003099	2-Hydroxy-3-iodo-5-nitrobenzaldehyde	2-羟基-3-碘-5-硝基苯甲醛	Benzene and substituted derivatives	苯及其衍生物	Benzene and substituted derivatives	苯及其衍生物	C7H4INO4	3	0.5726	70331-81-6	1127.65	45.61	217.89	3747.53	1376.61	1602.92	1.0786	0.128318	0.282492	0.206799	-2.2737	down	-	-
MW0152632	H-Leu-val-OH	亮氨酰-缬氨酸	Amino acids and derivatives	氨基酸及其衍生物	Amino acids and derivatives	氨基酸及其衍生物	C11H22N2O3	3	0.5708	13588-95-9	13399	14546	8110.96	20080.5	30950	33430.5	1.2629	0.040698	0.160577	0.426896	-1.22805	down	-	-
MW0015437	9-Decenoic acid	9-癸烯酸	Lipids	脂质	Free fatty acids	游离脂肪酸	C10H18O2	3	0.5672	14436-32-9	15126.8	10340.1	6670.38	24112.4	23932	21917.9	1.25734	0.0280438	0.140311	0.459351	-1.12233	down	-	-
MEDN0237	D-Glucuronic Acid	D-葡萄糖醛酸	Others	其它类	Saccharides	糖类	C6H10O7	3	0.5667	528-16-5	146248	224494	257605	82057.9	115825	83387	1.2847	0.0605076	0.189887	2.23397	1.15961	up	C00191	ko00040,ko00053,ko00520,ko00562,ko01100,ko01240,ko01250
MW0130099	Leukoefdin	2-(3,4,5-三羟基苯基)-3,4-二氢-2H-1-苯并吡喃-3,4,5,7-四硝基	Benzene and substituted derivatives	苯及其衍生物	Benzene and substituted derivatives	苯及其衍生物	C15H14O8	3	0.566	491-52-1 | 12764-74-8	820.39	4650.58	482.8	10139.6	6391.25	25303.5	1.18541	0.168984	0.327658	0.142318	-2.81281	down	-	-
MEDP1162	1-Methylguanine	1-甲基鸟嘌呤	Nucleotides and derivatives	核苷酸及其衍生物	Nucleotides and derivatives	核苷酸及其衍生物	C6H7N5O	3	0.5508	938-85-2	4426.62	23448.6	16668.4	1456.52	2046.79	2859.68	1.23071	0.14882	0.306355	7.00042	2.80744	up	C04152	-
ZINC85504886	Ephedradine B	麻黄碱B	Heterocyclic compounds	杂环化合物	Heterocyclic compounds	杂环化合物	C29H38N4O5	3	0.5375	71327-57-6	797.78	1039.85	1510.83	1564.93	4560.09	3523.93	1.15528	0.132585	0.287878	0.347028	-1.52687	down	-	-
FDATN01412	DL-Glutamine	DL-谷氨酰胺	Amino acids and derivatives	氨基酸及其衍生物	Amino acids and derivatives	氨基酸及其衍生物	C5H10N2O3	3	0.5369	6899-04-3 | 585-21-7 | 159663-16-8	11603.8	11406.1	10915.7	1240.88	6448.14	3659.67	1.15512	0.0356434	0.153149	2.98938	1.57985	up	C00303	-
MW0139231	Pachyrrhizin	地瓜苷	Heterocyclic compounds	杂环化合物	Heterocyclic compounds	杂环化合物	C19H12O6	3	0.5356	10091-01-7	3193.56	1863.01	1672.86	13452.5	9945.92	15238.9	1.39569	0.0143571	0.108851	0.174169	-2.52144	down	-	-
MW0114263	Digalacturonate	二半乳糖醛酸	Others	其它类	Saccharides	糖类	C12H18O13	3	0.5169	5894-59-7	14008.9	8136.14	15634	5368.87	5455.74	3795.44	1.29068	0.0700162	0.206139	2.58405	1.36963	up	C02273	ko00040,ko01100,ko02010
MW0127608	Epigallocatechin 3,5-digallate	表没食子儿茶素3,5-二没食子酰	Flavonoids	黄酮	Flavanols	黄烷醇类	C29H22O15	2	0.932	-	5094.56	10046.6	7720.38	13399.1	23416.1	13530.7	1.19063	0.0936274	0.240017	0.454089	-1.13895	down	-	-
MW0158456	Tyr-Glu-Gln-Asp	酪氨酸-谷氨酸-谷氨酸-天冬氨酸	Amino acids and derivatives	氨基酸及其衍生物	Amino acids and derivatives	氨基酸及其衍生物	C23H31N5O11	2	0.9055	-	7004.19	7495.27	7394.72	14656.9	11675.6	18025.6	1.35361	0.0542045	0.182385	0.493577	-1.01865	down	-	-
MW0015479	12(13)Ep-9-KODE	反式EKODE-(E)-Ib	Lipids	脂质	Free fatty acids	游离脂肪酸	C18H30O4	2	0.9051	-	164926	300541	210981	415914	503182	835821	1.25001	0.095788	0.243307	0.385459	-1.37535	down	-	-
MW0148348	D-galactaro-1,4-lactone	D-半乳糖-1，4-内酯	Others	其它类	Ketone compounds	酮类化合物	C6H8O7	2	0.9031	-	99163.6	149099	165167	27181.9	40449.3	41401.7	1.37853	0.0309117	0.145918	3.79179	1.92288	up	C20896	ko00053,ko01100
MW0144635	Ala-Leu-Gly-Ile-Ser	Ala-Leu-Gly-Ile-Ser	Amino acids and derivatives	氨基酸及其衍生物	Amino acids and derivatives	氨基酸及其衍生物	C20H37N5O7	2	0.9006	-	1571.41	1740.65	3961.76	47066.1	35054.6	64648.5	1.40541	0.0316304	0.146618	0.0495596	-4.33469	down	-	-
MW0149599	GlcNAc1-3Gal1-4GlcSp	GlcNAc1-3Gal1-4GlcSp	Others	其它类	Saccharides	糖类	C22H38N4O16	2	0.8866	-	316894	335663	201443	83542.7	109937	142130	1.29658	0.0395701	0.158838	2.54463	1.34746	up	-	-
MW0149739	Gln-Leu-Glu-Lys	谷酰氨-亮氨酸-谷氨酸-赖氨酸	Amino acids and derivatives	氨基酸及其衍生物	Amino acids and derivatives	氨基酸及其衍生物	C22H40N6O8	2	0.8825	-	53203.2	69134.8	44928.5	20536.6	38350	17237.6	1.20329	0.035063	0.152228	2.19728	1.13572	up	-	-
MW0158364	Tyr-Ala-Thr-Asp	酪氨酸-丙氨酸-苏氨酸-天门冬氨酸	Amino acids and derivatives	氨基酸及其衍生物	Amino acids and derivatives	氨基酸及其衍生物	C20H28N4O9	2	0.8798	-	686171	255243	229733	142880	140307	115948	1.15117	0.224052	0.383899	2.93422	1.55298	up	-	-
MW0158878	Val-Ala-Phe-Asp	Val-Ala-Phe-Asp	Amino acids and derivatives	氨基酸及其衍生物	Amino acids and derivatives	氨基酸及其衍生物	C21H30N4O7	2	0.8774	-	842711	725311	581773	1.63952e+06	1.47019e+06	1.65957e+06	1.39112	0.00103277	0.0554745	0.450759	-1.14957	down	-	-
MW0115119	Phenol glucuronide	苯基葡萄糖醛酸	Benzene and substituted derivatives	苯及其衍生物	Benzene and substituted derivatives	苯及其衍生物	C12H14O7	2	0.8619	-	1.26624e+06	1.2524e+06	866637	2.49741e+06	2.03981e+06	2.29015e+06	1.34977	0.00351801	0.0691677	0.495839	-1.01206	down	-	-
MW0158707	TyrMe-Met-OH	TyrMe-Met-OH	Amino acids and derivatives	氨基酸及其衍生物	Amino acids and derivatives	氨基酸及其衍生物	C21H24N2O7S	2	0.8161	-	20388.5	30203.3	25210	97688.5	95818.6	126864	1.41432	0.0103518	0.0964508	0.236606	-2.07944	down	-	-
MW0149377	Gal1-3[Fuc1-2]Gal1-4[Fuc1-3]GlcNAcSp	Gal1-3[Fuc1-2]Gal1-4[Fuc1-3]GlcNAcSp	Others	其它类	Saccharides	糖类	C34H58N4O24	2	0.8139	-	1830.06	1380.34	2834.3	6150.07	4762.7	7787.17	1.31707	0.0240921	0.133144	0.323247	-1.62929	down	-	-
MW0157692	Thr-Ile-Ser-Glu	Thr-Ile-Ser-Glu	Amino acids and derivatives	氨基酸及其衍生物	Amino acids and derivatives	氨基酸及其衍生物	C18H32N4O9	2	0.8132	-	25100	30777.9	32853.8	98238.1	91639.9	101740	1.42627	8.38096e-05	0.0243048	0.304274	-1.71656	down	-	-
MW0159302	Val-TyrMe-OH	Val-TyrMe-OH	Amino acids and derivatives	氨基酸及其衍生物	Amino acids and derivatives	氨基酸及其衍生物	C20H22N2O7	2	0.8114	-	4316.76	8470.58	7412.29	29829.5	37474.7	49052.7	1.38701	0.0245267	0.133887	0.173601	-2.52616	down	-	-
MW0146126	Asp-His-Leu-Asp	Asp-His-Leu-Asp	Amino acids and derivatives	氨基酸及其衍生物	Amino acids and derivatives	氨基酸及其衍生物	C20H30N6O9	2	0.8038	-	61425.8	23035.3	21433.3	56264.1	119752	117007	1.14563	0.0750088	0.212508	0.361385	-1.46839	down	-	-
MW0155283	Phe-Lys-Val-Glu	Phe-Lys-Val-Glu	Amino acids and derivatives	氨基酸及其衍生物	Amino acids and derivatives	氨基酸及其衍生物	C25H39N5O7	2	0.7958	-	30119.2	32240.7	45726.1	140.1	23779.2	1813.62	1.01772	0.0475954	0.173074	4.2003	2.07049	up	-	-
MW0137547	Caffeic acid phenethyl ester	咖啡酸苯乙酯	Phenolic acids	酚酸类	Phenolic acids	酚酸类	C17H16O4	2	0.7791	-	359.56	916.16	767.95	2144.18	3115.28	2806.8	1.32429	0.00738986	0.0838361	0.25336	-1.98074	down	C10484	-
MW0158430	Tyr-Gln-Asn-Glu	Tyr-Gln-Asn-Glu	Amino acids and derivatives	氨基酸及其衍生物	Amino acids and derivatives	氨基酸及其衍生物	C23H32N6O10	2	0.7739	-	39453.8	44411.4	88820.8	134470	132774	115537	1.23076	0.0335971	0.149895	0.451135	-1.14837	down	-	-
MW0103532	Diadenosine triphosphate	三磷酸二腺苷	Nucleotides and derivatives	核苷酸及其衍生物	Nucleotides and derivatives	核苷酸及其衍生物	C20H27N10O16P3	2	0.772	-	59133.1	72262	90195.7	10537.7	14089.2	2915.85	1.3217	0.0111996	0.100321	8.04533	3.00815	up	-	-
MW0011081	(2S)-Ompt	（2S)-OMPT	GP	甘油磷脂类	LPA	溶血磷脂酸	C22H43O6PS	2	0.7679	-	296586	245843	326397	124649	127530	65994.2	1.32025	0.00435427	0.073561	2.73067	1.44926	up	-	-
MW0149375	Gal(1-3)[Fuc(1-2)]Gal(1-4)GlcNAcSp	Gal(1-3)[Fuc(1-2)]Gal(1-4)GlcNAcSp	Others	其它类	Saccharides	糖类	C28H48N4O20	2	0.7646	-	15128	23895.6	29225.5	12705.7	4682.99	8953.47	1.18304	0.0558797	0.183972	2.59086	1.37343	up	-	-
MW0138534	Dactilin	异鼠李素-3-葡萄糖苷-4-葡萄糖苷	Flavonoids	黄酮	Flavones	黄酮	C28H32O17	2	0.7636	-	65877.8	58588.4	60874.4	35384.1	37228.2	12199.4	1.11791	0.0452192	0.169385	2.18532	1.12785	up	-	-
MW0169719	5-(7-Acetyloxy-4-methoxycarbonyl-9-methyl-11-oxo-10-oxatricyclo[6.3.2.01,7]tridec-3-en-9-yl)-2-methylpenta-2,4-dienoic acid	5-(7-Acetyloxy-4-methoxycarbonyl-9-methyl-11-oxo-10-oxatricyclo[6.3.2.01,7]tridec-3-en-9-yl)-2-methylpenta-2,4-dienoic acid	Organic acids	有机酸	Organic acids	有机酸	C23H28O8	2	0.7535	-	114487	183878	189204	42031.5	39838.9	46891.7	1.39815	0.0373159	0.15641	3.78659	1.9209	up	-	-
MW0146350	Asp-HoPhe-OH	Asp-HoPhe-OH	Amino acids and derivatives	氨基酸及其衍生物	Amino acids and derivatives	氨基酸及其衍生物	C19H18N2O8	2	0.7376	-	559385	566748	555767	216014	183983	211544	1.43544	0.000273171	0.0408875	2.75026	1.45957	up	-	-
MW0145898	Asn-Thr-Asp-Arg	Asn-Thr-Asp-Arg	Amino acids and derivatives	氨基酸及其衍生物	Amino acids and derivatives	氨基酸及其衍生物	C18H32N8O9	2	0.7371	-	5.42313e+06	3.59426e+06	5.70618e+06	2.22196e+06	2.53874e+06	2.15221e+06	1.333	0.0548691	0.18321	2.12987	1.09076	up	-	-
MW0157891	Threoninyl-Isoleucine	苏氨酰-异亮氨酸	Amino acids and derivatives	氨基酸及其衍生物	Amino acids and derivatives	氨基酸及其衍生物	C10H20N2O4	2	0.737	-	27599.4	31555.3	31377.7	15774.5	8094.25	19949.9	1.18708	0.0338162	0.15015	2.06607	1.04689	up	-	-
MEDP1046	TRIPHENYL PHOSPHATE	磷酸三苯酯	Others	其它类	Lactones	内酯类化合物	C18H15O4P	2	0.7366	-	1.23791e+06	706376	868048	550491	600102	234230	1.073	0.0768047	0.214683	2.03083	1.02207	up	C14235	-
MW0158705	TyrMe-Leu-OH	TyrMe-Leu-OH	Amino acids and derivatives	氨基酸及其衍生物	Amino acids and derivatives	氨基酸及其衍生物	C22H26N2O7	2	0.7351	-	2.86799e+06	3.69721e+06	3.70058e+06	972483	872050	1.23284e+06	1.40977	0.00667759	0.0823271	3.3359	1.73807	up	-	-
MW0157032	Ser-TyrMe-OH	Ser-TyrMe-OH	Amino acids and derivatives	氨基酸及其衍生物	Amino acids and derivatives	氨基酸及其衍生物	C19H20N2O8	2	0.7349	-	9653.15	37411.9	36153.8	65389.4	75950.7	66764.2	1.10461	0.0321455	0.147492	0.39989	-1.32233	down	-	-
MW0157912	Thr-Thr	苏氨酰苏氨酸	Amino acids and derivatives	氨基酸及其衍生物	Amino acids and derivatives	氨基酸及其衍生物	C8H16N2O5	2	0.7339	-	352145	293170	336977	91157	59751.8	58807.3	1.41619	0.000708631	0.0506524	4.68391	2.22771	up	-	-
MW0158690	Tyr-HoPhe-OH	Tyr-HoPhe-OH	Amino acids and derivatives	氨基酸及其衍生物	Amino acids and derivatives	氨基酸及其衍生物	C25H24N2O7	2	0.7281	-	51790.8	38316.2	31662.2	84745.8	81106.5	85928.4	1.34962	0.0140641	0.108164	0.483632	-1.04802	down	-	-
MW0144203	Abu-His-OH	Abu-His-OH	Amino acids and derivatives	氨基酸及其衍生物	Amino acids and derivatives	氨基酸及其衍生物	C15H16N4O6	2	0.7273	-	13093.4	25203.2	29866.8	90396.2	147717	224452	1.34613	0.0749629	0.212508	0.14736	-2.76259	down	-	-
MW0011470	9-nitro-9E-octadecenoic acid	（9E)-9-硝基十八烯酸	Lipids	脂质	Free fatty acids	游离脂肪酸	C18H33NO4	2	0.7267	-	7608.19	28696.3	32241.3	4670.64	4738.01	5467.11	1.19301	0.145307	0.301987	4.60788	2.2041	up	-	-
MW0151213	HoPhe-His-OH	HoPhe-His-OH	Others	其它类	Lactones	内酯类化合物	C21H20N4O6	2	0.7234	-	68387.6	51646.1	52175.8	20420.2	17240.6	27689.3	1.3645	0.00959912	0.0931797	2.63519	1.3979	up	-	-
MW0131753	Oroxylin A-7-o-beta-D-glucuronide	3，4，5-三羟基-6-[（5-羟基-6-甲氧基-4-氧代-2-苯基-4H-苯并吡喃-7-基）氧基]恶烷-2-羧酸	Organic acids	有机酸	Organic acids	有机酸	C22H20O11	2	0.7173	-	87038.8	91385.4	96287.5	337882	352035	99011.2	1.062	0.171885	0.330658	0.348209	-1.52198	down	-	-
MW0158307	Trp-Nap-OH	Trp-Nap-OH	Amino acids and derivatives	氨基酸及其衍生物	Amino acids and derivatives	氨基酸及其衍生物	C30H25N3O6	2	0.7155	-	1.07005e+06	1.8048e+06	1.5537e+06	311081	370590	164126	1.36422	0.0240338	0.133075	5.23595	2.38845	up	-	-
MW0123498	Deacetoxy(7)-7-oxokhivorinic acid	Deacetoxy(7)-7-oxokhivorinic acid	Organic acids	有机酸	Organic acids	有机酸	C27H36O10	2	0.7069	-	53743.1	91059.8	56025.4	248600	234005	317362	1.39226	0.00703402	0.0828372	0.251046	-1.99398	down	-	-
MW0144612	Ala-Ile-Cys-Glu	Ala-Ile-Cys-Glu	Amino acids and derivatives	氨基酸及其衍生物	Amino acids and derivatives	氨基酸及其衍生物	C17H30N4O7S	2	0.7034	-	136885	81962.5	139859	23446	18907.7	12087.2	1.39206	0.0296236	0.14378	6.58891	2.72004	up	-	-
MW0111943	3-carboxy-2,3-dihydroxypropanoate	酒石酸	Organic acids	有机酸	Organic acids	有机酸	C4H6O6	2	0.7016	-	115891	118887	154648	62062.6	73102.3	46094.4	1.33211	0.0138321	0.107988	2.14845	1.10329	up	-	-
MW0158704	TyrMe-Ile-OH	TyrMe-Ile-OH	Amino acids and derivatives	氨基酸及其衍生物	Amino acids and derivatives	氨基酸及其衍生物	C22H26N2O7	2	0.7008	-	41210	90238.6	97728.7	180545	137531	262059	1.18232	0.0662439	0.200634	0.395041	-1.33992	down	-	-
MW0158912	Val-Asn-Asp-Lys	Val-Asn-Asp-Lys	Amino acids and derivatives	氨基酸及其衍生物	Amino acids and derivatives	氨基酸及其衍生物	C19H34N6O8	3	0.9902	-	14523.6	20809.7	21112.9	57318.2	53014.7	46993.5	1.39365	0.00124927	0.0554745	0.358784	-1.47881	down	-	-
MEDL01789	4-O-Methylgallic acid	4-O-甲基没食子酸	Phenolic acids	酚酸类	Phenolic acids	酚酸类	C8H8O5	3	0.9713	-	180406	337773	295047	78627.2	126153	94351.9	1.303	0.0575556	0.185481	2.71862	1.44287	up	-	-
MW0050742	DG(20:5(5Z,8Z,11Z,14Z,17Z)/22:6(4Z,7Z,10Z,13Z,16Z,19Z)/0:0)	DG(20:5(5Z,8Z,11Z,14Z,17Z)/22:6(4Z,7Z,10Z,13Z,16Z,19Z)/0:0)	GL	甘油脂类	DG	甘油二酯	C45H66O5	3	0.964	-	11514.9	16192.8	17245.3	5204.75	7348.02	6233.21	1.35507	0.0277337	0.139926	2.3929	1.25876	up	-	-
MEDL00494	9-[(3S,4S,5R)-3,4-dihydroxy-5-(hydroxymethyl)oxolan-2-yl]-1H-purin-6-one	阿拉伯糖基次黄嘌呤	Nucleotides and derivatives	核苷酸及其衍生物	Nucleotides and derivatives	核苷酸及其衍生物	C10H12N4O5	3	0.95	-	4801.3	6963.15	11079.6	34528	45143.7	34243	1.37374	0.00493783	0.0774038	0.200537	-2.31806	down	-	-
pmp000199	Soyasaponin gammag	大豆皂苷 γg	Terpenoids	萜类	Triterpene Saponin	三萜皂苷	C48H74O17	3	0.9342	-	22379.6	22673.3	22627.3	61225.6	90500.2	67839.3	1.41453	0.0293007	0.142511	0.308247	-1.69784	down	-	-
MW0128695	[3,5,7-trihydroxy-2-(4-hydroxyphenyl)-3,4-dihydro-2H-1-benzopyran-4-yl]oxidanesulfonic acid	[3,5,7-三羟基-2-(4-羟基苯基)-3,4-二氢-2H-1-苯并吡喃-4-基]氧化磺酸	Organic acids	有机酸	Organic acids	有机酸	C15H14O9S	3	0.9329	-	157555	73695.6	54776.9	35323	46772.1	24179.4	1.12223	0.194234	0.354543	2.6914	1.42836	up	-	-
MW0153191	Lys-Tyr-Val-Met-Leu	Lys-Tyr-Val-Met-Leu	Amino acids and derivatives	氨基酸及其衍生物	Amino acids and derivatives	氨基酸及其衍生物	C31H52N6O7S	3	0.9028	-	145344	130568	119437	45904.6	43606.2	44643.7	1.43291	0.00699564	0.0827287	2.94696	1.55923	up	-	-
MW0165072	10(R),17(R)-dihydroxydocosa-4Z,7Z,11E,13E,15Z,19Z-hexaenoic acid	10(R),17(R)-dihydroxydocosa-4Z,7Z,11E,13E,15Z,19Z-hexaenoic acid	Lipids	脂质	Free fatty acids	游离脂肪酸	C22H32O4	3	0.8923	-	1831.22	92.29	366.68	3356.28	7104.74	10522	1.20019	0.0864511	0.229876	0.109145	-3.19568	down	-	-
MW0128842	[5,7-dihydroxy-2-(3-hydroxyphenyl)-4-[3,5,7-trihydroxy-2-(3-hydroxyphenyl)-3,4-dihydro-2H-1-benzopyran-8-yl]-6-[3,4,5-trihydroxy-6-(hydroxymethyl)oxan-2-yl]-3,4-dihydro-2H-1-benzopyran-3-yl]oxidanesulfonic acid	[5，7-二羟基-2-(3-羟基苯基)-4-[3，5，7-三羟基-2-(3-羟基苯基)-3，4-二氢-2H-1-苯并吡喃-8-基]-6-[3，4，5-三羟基-6-(羟甲基）恶烷-2-基]-3，4-二氢-2H-1-苯并吡喃-3-基]氧烷磺酸	Organic acids	有机酸	Organic acids	有机酸	C36H36O18S	3	0.8872	-	29671.1	17643.2	11031.5	42626.7	48727.8	35052.9	1.18085	0.0323986	0.148042	0.461569	-1.11538	down	-	-
MW0137174	Dioonflavone	地黄酮	Others	其它类	Ketone compounds	酮类化合物	C36H30O10	3	0.88	-	502664	366040	344038	143083	144328	157583	1.39876	0.0346112	0.152032	2.7253	1.44642	up	-	-
MW0129217	{3-[8-(5,7-dihydroxy-4-oxo-2-phenyl-3,4-dihydro-2H-1-benzopyran-3-yl)-5,7-dihydroxy-4-oxo-3,4-dihydro-2H-1-benzopyran-2-yl]phenyl}oxidanesulfonic acid	{3-[8-(5，7-二羟基-4-氧代-2-苯基-3，4-二氢-2H-1-苯并吡喃-3-基)-5，7-二羟基-4-氧代-3，4-二氢-2H-1-苯并吡喃-2-基]苯基}氧代磺酸	Organic acids	有机酸	Organic acids	有机酸	C30H22O12S	3	0.8741	-	78092.5	104144	113073	27781.9	36115.9	24991.8	1.39744	0.0154669	0.11117	3.3222	1.73214	up	-	-
MW0143832	6-Geranylchrysin	6-香叶基白杨素	Flavonoids	黄酮	Flavones	黄酮	C25H26O4	3	0.8682	-	676911	483490	391451	181768	194848	219906	1.35253	0.0608619	0.190449	2.6015	1.37934	up	C11574	-
MW0135106	6,11-dihydroxy-2,2,5-trimethyl-12-(6,8,11-trihydroxy-2,2,5-trimethyl-10-oxo-3,4,5,10-tetrahydro-2H-1-oxa-5-azatetraphen-4-yl)-5,10-dihydro-2H-1-oxa-5-azatetraphen-10-one	6,11-二羟基-2,2,5-三甲基-12-(6,8,11-三羟基-2,2,5-三甲基-10-氧代-3,4,5,10-四氢-2H-1-氧杂-5-氮杂四酚-4-基)-5,10-二氢-2H-1-氧杂-5-氮杂四酚-10-酮	Others	其它类	Ketone compounds	酮类化合物	C38H34N2O9	3	0.8441	-	43035.1	94791.3	50830.7	181746	155896	732833	1.17607	0.258115	0.416806	0.176237	-2.50441	down	-	-
ZINC103576770	[(1S,2S,3R,5S,8R,9R,10R)-2-acetyloxy-1,9,10-trihydroxy-8,12,15,15-tetramethyl-4-methylidene-13-oxo-5-tricyclo[9.3.1.03,8]pentadec-11-enyl] (Z)-3-phenylprop-2-enoate	[（1S，2S，3R，5S，8R，9R，10R)-2-乙酰氧基-1，9，10-三羟基-8，12，15，15-四甲基-4-亚甲基-13-氧代-5-三环[9.3.1.03，8]十五-11-烯基]（Z)-3-苯基丙-2-烯酸酯	Others	其它类	Lactones	内酯类化合物	C31H38O8	3	0.8344	-	264669	180486	258367	97891.1	91462.9	87996.7	1.39141	0.0331911	0.149231	2.53658	1.34288	up	-	-
MW0002121	[2,3,5-Trihydroxy-6-(hydroxymethyl)oxan-4-yl] 3,4,5-trihydroxybenzoate	3，4，5-三羟基苯甲酸2，3，5-三羟基-6-(羟甲基）恶烷-4-基酯	Benzene and substituted derivatives	苯及其衍生物	Benzene and substituted derivatives	苯及其衍生物	C13H16O10	3	0.8206	-	51645.8	37245.1	40522.3	93158	101585	97982.9	1.40222	0.00133737	0.0554745	0.442097	-1.17757	down	-	-
MW0104457	2-{[hydroxy(2,4,5-trihydroxyphenyl)methylidene]amino}acetic acid	2-{[羟基（2，4，5-三羟基苯基）亚甲基]氨基}乙酸	Organic acids	有机酸	Organic acids	有机酸	C9H9NO6	3	0.8187	-	26881.4	20779.4	25009.8	9546.95	6756.77	10241.1	1.38448	0.00400172	0.0722456	2.73766	1.45294	up	-	-
MEDN1262	LPS(18:2/0:0)	LPS(18:2/0:0)	GP	甘油磷脂类	LPS	溶血磷脂酰丝氨酸	C24H44NO9P	3	0.7987	-	14917.7	26649.4	21478.9	8432.58	2816.86	8330.96	1.21673	0.0314548	0.146498	3.21985	1.68699	up	-	-
MEDL02054	3-Pyridinemethanol	3-吡啶甲醇	Alcohol and amines	醇、胺类	Alcohols	醇类	C6H7NO	3	0.7984	-	349899	539194	613759	187662	179786	188550	1.36367	0.0565278	0.184305	2.70298	1.43455	up	-	-
MW0135683	6-{[2-(2,4-dihydroxyphenyl)-3-(3,7-dimethylocta-2,6-dien-1-yl)-4-oxo-4H-chromen-7-yl]oxy}-3,4,5-trihydroxyoxane-2-carboxylic acid	6-{[2-(2，4-二羟基苯基)-3-(3，7-二甲基辛-2，6-二烯-1-基)-7-羟基-4-氧代-4H-苯并吡喃-6-基]氧}-3，4，5-三羟基恶烷-2-羧酸	Organic acids	有机酸	Organic acids	有机酸	C31H34O11	3	0.7958	-	77639.1	37454.2	63056.2	24536.2	21236.3	12055.1	1.26821	0.0647347	0.198133	3.0807	1.62326	up	-	-
MW0128207	(4-{6-[3,7-dihydroxy-2-(3-hydroxyphenyl)-3,4-dihydro-2H-1-benzopyran-4-yl]-3,5,7-trihydroxy-2-(3-hydroxyphenyl)-3,4-dihydro-2H-1-benzopyran-8-yl}-7-hydroxy-2-(3-hydroxyphenyl)-3,4-dihydro-2H-1-benzopyran-3-yl)oxidanesulfonic acid	（4-{6-[3，7-二羟基-2-(3-羟基苯基)-3，4-二氢-2H-1-苯并吡喃-4-基]-3，5，7-三羟基-2-(3-羟基苯基)-3，4-二氢-2H-1-苯并吡喃-8-基}-7-羟基-2-	Organic acids	有机酸	Organic acids	有机酸	C45H38O16S	3	0.7896	-	7.6712e+06	6.66294e+06	7.56795e+06	4.42493e+06	3.83606e+06	2.60745e+06	1.31485	0.00762489	0.0850856	2.0152	1.01092	up	-	-
MW0003766	3-(3-Methoxy-4-sulooxyphenyl)-2-oxopropanoic acid	3-[3-甲氧基-4-(磺氧基）苯基]-2-氧代丙酸	Benzene and substituted derivatives	苯及其衍生物	Benzene and substituted derivatives	苯及其衍生物	C10H10O8S	3	0.7858	-	4433.41	12460.6	4133.36	599.65	1168.04	2790.1	1.16743	0.176107	0.335717	4.61351	2.20586	up	-	-
MW0137135	8,16-Dihydroxy-6-(6-hydroxy-1-benzouran-2-yl)-12-methyl-3,13-dioxapentacyclo[10.7.1.02,10.04,9.014,19]icosa-2(10),4,6,8,14(19),15,17-heptaen-11-one	8,16-二羟基二十碳四烯酸	Lipids	脂质	Free fatty acids	游离脂肪酸	C27H18O7	3	0.7816	-	559715	412863	383815	2.35845e+06	2.76031e+06	2.11187e+06	1.42443	0.00583936	0.0805574	0.18759	-2.41435	down	-	-
MW0130125	2-(3,4-Dihydroxyphenyl)-3,5,7-trihydroxy-6-methoxy-2,3-dihydrochromen-4-one	2-(3，4-二羟基苯基)-3，5，7-三羟基-6-甲氧基-3，4-二氢-2H-1-苯并吡喃-4-酮	Benzene and substituted derivatives	苯及其衍生物	Benzene and substituted derivatives	苯及其衍生物	C16H14O8	3	0.7798	-	54391.3	34455.8	42895.7	5797.66	11621.4	2527.41	1.31632	0.0118538	0.102424	6.60483	2.72352	up	-	-
MW0107702	Leu-Ala-Lys	L-亮氨酸-L-丙氨酸-L-赖氨酸	Amino acids and derivatives	氨基酸及其衍生物	Amino acids and derivatives	氨基酸及其衍生物	C15H30N4O4	3	0.7774	-	3788.53	14498.6	12695.7	24534.5	37625.4	163775	1.12593	0.280476	0.435315	0.137132	-2.86637	down	-	-
MEDN1092	4-Hydroxyphenyl acetate	4-乙酰氧基苯酚	Phenolic acids	酚酸类	Phenolic acids	酚酸类	C8H8O3	3	0.7755	-	200064	160130	162876	79912.7	85400	64661.2	1.39259	0.00728662	0.0832757	2.27448	1.18554	up	C13636	ko01100
MW0134819	6-(2,4-dihydroxyphenyl)-2-(4-{7-[(3,3-dimethyloxiran-2-yl)methyl]-6-hydroxy-1-benzofuran-2-yl}-2,6-dihydroxyphenyl)-4-methylcyclohex-3-ene-1-carboxylic acid	6-(2，4-二羟基苯基)-2-(4-{7-[（3，3-二甲基环氧乙烷-2-基）甲基]-6-羟基-1-苯并呋喃-2-基}-2，6-二羟基苯基)-4-甲基环己-3-烯-1-羧酸	Organic acids	有机酸	Organic acids	有机酸	C33H32O9	3	0.7735	-	19952	23006.5	22064.7	64399.9	91136.4	75435.1	1.42158	0.0180116	0.118882	0.281521	-1.82869	down	-	-
MW0128213	(4-{8-[3,7-dihydroxy-2-(3-hydroxyphenyl)-3,4-dihydro-2H-1-benzopyran-4-yl]-3,5,7-trihydroxy-2-(3-hydroxyphenyl)-3,4-dihydro-2H-1-benzopyran-6-yl}-7-hydroxy-2-(3-hydroxyphenyl)-3,4-dihydro-2H-1-benzopyran-3-yl)oxidanesulfonic acid	（4-{8-[3，7-二羟基-2-(3-羟基苯基)-3，4-二氢-2H-1-苯并吡喃-4-基]-3，5，7-三羟基-2-(3-羟基苯基)-3，4-二氢-2H-1-苯并吡喃-6-基}-7-羟基-2-	Organic acids	有机酸	Organic acids	有机酸	C45H38O16S	3	0.77	-	2.89219e+06	2.04576e+06	2.49895e+06	1.03802e+06	915156	397410	1.2812	0.00645309	0.0818674	3.16385	1.66168	up	-	-
MW0135146	6,7,8-trihydroxy-3-(4-hydroxyphenyl)-3,4-dihydro-2H-1-benzopyran-4-one	6，7，8-三羟基-3-(4-羟基苯基)-3，4-二氢-2H-1-苯并吡喃-4-酮	Benzene and substituted derivatives	苯及其衍生物	Benzene and substituted derivatives	苯及其衍生物	C15H12O6	3	0.7655	-	1.43352e+06	2.74787e+06	2.5971e+06	848995	760128	1.27249e+06	1.22855	0.0741253	0.211917	2.35233	1.23409	up	-	-
MEDN0573	GDP-L-fucose	GDP-L-岩藻糖	Nucleotides and derivatives	核苷酸及其衍生物	Nucleotides and derivatives	核苷酸及其衍生物	C16H25N5O15P2	3	0.7644	-	21945.5	26283.3	35147.5	1645.76	3307.13	2180.49	1.4163	0.0211839	0.126503	11.6882	3.54698	up	-	-
MW0134150	5,7-dihydroxy-3-[3-hydroxy-4-methoxy-5-(3-methylbut-2-en-1-yl)phenyl]-8-(3-methylbut-2-en-1-yl)-3,4-dihydro-2H-1-benzopyran-4-one	5，7-二羟基-3-[3-羟基-4-甲氧基-5-(3-甲基丁-2-烯-1-基）苯基]-8-(3-甲基丁-2-烯-1-基)-3，4-二氢-2H-1-苯并吡喃-4-酮	Benzene and substituted derivatives	苯及其衍生物	Benzene and substituted derivatives	苯及其衍生物	C26H30O6	3	0.7627	-	18384.2	17953.8	8214.58	40900.2	58654.4	45898.8	1.31525	0.0092538	0.0918335	0.306301	-1.70698	down	-	-
MW0134824	6-(2,4-dihydroxyphenyl)-2-{3-[3-(2,4-dihydroxyphenyl)propanoyl]-2,6-dihydroxyphenyl}-4-methylcyclohex-3-ene-1-carboxylic acid	6-(2，4-二羟基苯基)-2-{3-[3-(2，4-二羟基苯基）丙酰基]-2，6-二羟基苯基}-4-甲基环己-3-烯-1-羧酸	Organic acids	有机酸	Organic acids	有机酸	C29H28O9	3	0.7616	-	93036	88165.7	75990.3	154004	150062	245237	1.3113	0.0849435	0.227562	0.468215	-1.09476	down	-	-
MW0132707	3,5,7-trihydroxy-6-methoxy-2-(3,4,5-trihydroxyphenyl)-3,4-dihydro-2H-1-benzopyran-4-one	3，5，7-三羟基-6-甲氧基-2-(3，4，5-三羟基苯基)-3，4-二氢-2H-1-苯并吡喃-4-酮	Benzene and substituted derivatives	苯及其衍生物	Benzene and substituted derivatives	苯及其衍生物	C16H14O9	3	0.7594	-	12503.2	4330.38	22483.6	137359	98684.5	15925	1.03714	0.184051	0.343108	0.15604	-2.68001	down	-	-
MW0130119	2-(3,4-dihydroxyphenyl)-3,4-dihydro-2H-1-benzopyran-3,5,6,7-tetrol	2-(3，4-二羟基苯基)-3，4-二氢-2H-1-苯并吡喃-3，5，6，7-四醇	Benzene and substituted derivatives	苯及其衍生物	Benzene and substituted derivatives	苯及其衍生物	C15H14O7	3	0.7538	-	531076	596645	573928	253602	228823	161525	1.38824	0.000814856	0.0517936	2.64252	1.40191	up	-	-
MW0130610	2-{2,6-dihydroxy-4-[6-hydroxy-7-(3-methylbut-2-en-1-yl)-1-benzofuran-2-yl]phenyl}-4-(2,4-dihydroxyphenyl)-6-methyl-7-oxabicyclo[4.1.0]heptane-3-carboxylic acid	2-{2，6-二羟基-4-[6-羟基-7-(3-甲基丁-2-烯-1-基)-1-苯并呋喃-2-基]苯基}-4-(2，4-二羟基苯基)-6-甲基-7-氧杂二环[4.1.0]庚烷-3-羧酸	Organic acids	有机酸	Organic acids	有机酸	C33H32O9	3	0.7511	-	8841.23	11728.8	10974.7	29718.1	22267.1	36308	1.37089	0.0380061	0.157291	0.357272	-1.4849	down	-	-
MEDN1230	Diethyl sulfate	硫酸二乙酯	Others	其它类	Lactones	内酯类化合物	C4H10O4S	3	0.7487	-	6910.02	2229.57	3585.55	20593.3	22194.9	4554.9	1.01432	0.171006	0.32965	0.268786	-1.89547	down	C14706	-
Lmdp004892	Kaempferol-3-O-(6''-malonyl)galactoside	山柰酚-3-O-(6''-丙二酰)半乳糖苷	Flavonoids	黄酮	Flavonols	黄酮醇	C24H22O14	3	0.7479	-	48.27	152.22	473.17	2092.46	2632.78	860.53	1.2218	0.081573	0.222777	0.120603	-3.05166	down	-	-
MW0134272	1-(3,4,5-Trihydroxyphenyl)-3-(2,4,6-trihydroxyphenyl)-2-propanol	5-[2-羟基-3-(2,4,6-三羟基苯基）丙基]苯-1,2,3-三醇	Benzene and substituted derivatives	苯及其衍生物	Benzene and substituted derivatives	苯及其衍生物	C15H16O7	3	0.7473	-	61828.3	58090.4	53517.8	29008.2	21144.9	33783.6	1.34346	0.00417992	0.0729129	2.06628	1.04703	up	-	-
MW0141294	11-Methoxy-vinorine	11-甲氧基-长春花碱	Alkaloids	生物碱	Alkaloids	生物碱	C22H24N2O3	3	0.7459	-	246567	135987	231185	76858.3	73715.9	89986.3	1.32382	0.0665306	0.201016	2.55129	1.35123	up	C12073	-
ZINC85492413	Deacetylranaconitine	去乙酰乌头碱	Tryptamines,Cholines,Pigments	色胺、胆碱、色素	Cholines	胆碱类	C30H42N2O8	3	0.7448	-	8451.51	3430.91	1473.83	23417.7	7996.36	25662.2	1.13326	0.106048	0.257086	0.234007	-2.09538	down	-	-
MW0129321	[4-[5,7-Dihydroxy-8-(3-methylbut-2-enyl)-4-oxo-2,3-dihydrochromen-3-yl]-2-hydroxy-6-(3-methylbut-2-enyl)phenyl] hydrogen sulate	{4-[5，7-二羟基-8-(3-甲基丁-2-烯-1-基)-4-氧代-3，4-二氢-2H-1-苯并吡喃-3-基]-2-羟基-6-(3-甲基丁-2-烯-1-基）苯基}氧代磺酸	Organic acids	有机酸	Organic acids	有机酸	C25H28O9S	3	0.7414	-	65838.1	60349.5	41736.1	28035	25537.2	28156.4	1.33072	0.0569895	0.184917	2.05465	1.03889	up	-	-
MW0129999	2-(2,4-dihydroxyphenyl)-3-(3,7-dimethylocta-2,6-dien-1-yl)-5,7-dihydroxy-6-(3-methylbut-2-en-1-yl)-3,4-dihydro-2H-1-benzopyran-4-one	2-(2，4-二羟基苯基)-3-(3，7-二甲基辛-2，6-二烯-1-基)-5，7-二羟基-6-(4-羟基-3-甲基丁-2-烯-1-基)-3，4-二氢-2H-1-苯并吡喃-4-酮	Others	其它类	Others	其它	C30H36O6	3	0.7405	-	4654.9	9039.8	10812.8	34988.1	44511.4	23656	1.32147	0.0395091	0.158838	0.237578	-2.07353	down	-	-
MW0132737	3,5-Dihydroxy-2-(3,4,5-trihydroxyphenyl)-7-[[3,4,5-trihydroxy-6-(hydroxymethyl)tetrahydro-2H-pyran-2-yl]oxy]-4H-1-benzopyran-4-one	3，5-二羟基-7-{[3，4，5-三羟基-6-(羟甲基）恶烷-2-基]氧}-2-(3，4，5-三羟基苯基)-4H-苯并吡喃-4-酮	Others	其它类	Ketone compounds	酮类化合物	C21H20O13	3	0.7364	-	38951.9	43807.5	46707.7	116468	119686	42979.8	1.01015	0.183714	0.342618	0.463817	-1.10837	down	-	-
MW0159411	Xanthosine 5'-(trihydrogen diphosphate)	黄嘌呤5'-焦磷酸	Nucleotides and derivatives	核苷酸及其衍生物	Nucleotides and derivatives	核苷酸及其衍生物	C10H14N4O12P2	3	0.7364	-	62269.1	11823	78106.5	159317	236455	212117	1.15664	0.00774738	0.0850856	0.250373	-1.99785	down	C01337	ko01232
MW0140216	(1R,10aS)-1,4,10,10a-tetrahydrophenazine-1-carboxylic acid	（1R，10aS)-1,4,10,10a-四氢吩嗪-1-羧酸酯	Others	其它类	Lactones	内酯类化合物	C13H12N2O2	3	0.7351	-	8634.59	4083.12	7360.84	2145.62	4139.85	3259.08	1.11895	0.106881	0.258295	2.10367	1.07291	up	C21411	ko01100,ko01110
MW0152665	l-Histidinol phosphate	L-组氨酸磷酸酯	Organic acids	有机酸	Organic acids	有机酸	C6H12N3O4P	3	0.7349	-	35148.9	28653.2	21765.1	14263.2	19086.3	5668.36	1.07804	0.047966	0.173558	2.19302	1.13292	up	C01100	ko00340,ko01100,ko01110,ko01230
MW0134157	Assamene	5，7-二羟基-4-(1-羟丙基)-6-(3-甲基丁-2-烯-1-基)-8-(2-甲基丁酰基)-2H-苯并吡喃-2-酮	Others	其它类	Ketone compounds	酮类化合物	C22H28O6	3	0.7326	-	21488.7	7506.7	3635.88	45667.6	37351.2	67675.8	1.23274	0.0288766	0.141486	0.216539	-2.2073	down	-	-
MW0132850	CID 75111068	3-[（3,4-二羟基-6-甲基-5-{[3,4,5-三羟基-6-(羟甲基）氧代-2-基]氧基]-2-(3,4-二羟苯基)-5-羟基-7-{[3,4,5-三羟基-6-(羟甲基）氧代-2-基]氧基]-4H-铬-4-酮	Others	其它类	Ketone compounds	酮类化合物	C33H40O21	3	0.7318	-	338450	79225	59895.1	496603	309306	448379	1.08462	0.0830649	0.224867	0.38075	-1.39308	down	-	-
MW0132957	3-{[3,4-dihydroxy-5-(hydroxymethyl)oxolan-2-yl]oxy}-5,7-dihydroxy-2-(3-hydroxyphenyl)-4H-chromen-4-one	3-{[3，4-二羟基-5-(羟甲基）氧杂环戊烷-2-基]氧}-5，7-二羟基-2-(3-羟基苯基)-4H-苯并吡喃-4-酮	Others	其它类	Ketone compounds	酮类化合物	C20H18O10	3	0.7315	-	96295.6	183722	120989	2096.05	4157.12	1355.65	1.41784	0.0370742	0.15591	52.7029	5.71981	up	-	-
MW0135343	6-[1-(3,4-dihydroxyphenyl)-3-(4-methoxy-1-benzofuran-5-yl)-1,3-dioxopropan-2-yl]-3,4,5-trihydroxyoxane-2-carboxylic acid	6-[1-(3，4-二羟基苯基)-3-(4-甲氧基-1-苯并呋喃-5-基)-1，3-二氧代丙-2-基]-3，4，5-三羟基恶烷-2-羧酸	Organic acids	有机酸	Organic acids	有机酸	C24H22O12	3	0.7309	-	16280	21934.5	25022.3	4091.13	6501.44	3754.39	1.38922	0.0159	0.112292	4.40768	2.14002	up	-	-
MW0011088	NCGC00384520-01_C24H30O14_2H-Pyran-4-acetic acid, 5-carboxy-2-(beta-D-glucopyranosyloxy)-3,4-dihydro-3-(2-hydroxyethylidene)-, alpha-[2-(3,4-dihydroxyphenyl)ethyl] ester, (2S,3Z,4S)-	NCGC00384520-01_C24H30O14_2H-Pyran-4-acetic acid, 5-carboxy-2-(beta-D-glucopyranosyloxy)-3,4-dihydro-3-(2-hydroxyethylidene)-, alpha-[2-(3,4-dihydroxyphenyl)ethyl] ester, (2S,3Z,4S)-	Organic acids	有机酸	Organic acids	有机酸	C24H30O14	3	0.7299	-	6152.89	8099.04	6801.36	14289.3	11162.3	23732.7	1.24475	0.128123	0.28249	0.428049	-1.22415	down	-	-
MW0133402	4,6-dihydroxy-2-(hydroxymethyl)-5-(3,4,5-trihydroxybenzoyloxy)oxan-3-yl 3,4,5-trihydroxybenzoate	4，6-二羟基-2-(羟甲基)-5-(3，4，5-三羟基苯甲酰氧基）恶烷-3-基3，4，5-三羟基苯甲酸酯	Benzene and substituted derivatives	苯及其衍生物	Benzene and substituted derivatives	苯及其衍生物	C20H20O14	3	0.7292	-	88300.4	95161.3	69991	27667	37950.1	20027.1	1.35017	0.00524216	0.078477	2.95937	1.56529	up	-	-
MW0014318	Ncgc00384888-01_C21H32O9_	ncgc00384888-01_C21H32O9_	Benzene and substituted derivatives	苯及其衍生物	Benzene and substituted derivatives	苯及其衍生物	C21H32O9	3	0.729	-	234.53	1513.68	866.65	10356.7	5901.13	7940.3	1.3041	0.0234989	0.13157	0.10806	-3.21009	down	-	-
MW0112403	3,4,5-Trihydroxy-6-[(1-oxoisochromen-3-yl)methoxy]oxane-2-carboxylic acid	3，4，5-三羟基-6-[（1-氧代-1H-异色烯-3-基）甲氧基]恶烷-2-羧酸	Organic acids	有机酸	Organic acids	有机酸	C16H16O9	3	0.7289	-	720215	988879	1.22321e+06	2.4218e+06	3.22804e+06	2.95854e+06	1.37058	0.00466938	0.0752288	0.340634	-1.55371	down	-	-
MW0009242	O-Desethyl Candesartan	O-去乙基坎地沙坦	Benzene and substituted derivatives	苯及其衍生物	Benzene and substituted derivatives	苯及其衍生物	C22H16N6O3	3	0.727	-	48559.9	39362.5	54191.5	15280.9	16533.2	22445	1.37917	0.00931984	0.0922049	2.61918	1.38911	up	-	-
MW0128504	[(6-hydroxy-1-oxo-1H-isochromen-3-yl)methoxy]sulfonic acid	[（6-羟基-1-氧代-1H-异色烯-3-基）甲氧基]磺酸	Organic acids	有机酸	Organic acids	有机酸	C10H8O7S	3	0.7233	-	18127.8	35936.1	34516.9	2747.32	6423.46	7213.33	1.32263	0.0453762	0.169385	5.40651	2.4347	up	-	-
MW0129310	{4-[3-(5-methoxy-2,2-dimethyl-2H-chromen-6-yl)propanoyl]phenyl}oxidanesulfonic acid	{4- [3-(5-甲氧基-2,2-二甲基-2H-铬-6-基）丙酰基]苯基}氧化磺酸	Organic acids	有机酸	Organic acids	有机酸	C21H22O7S	3	0.7216	-	78253.9	48876.2	62849.1	31934.1	30640.3	18703.7	1.28552	0.0328059	0.148547	2.3374	1.2249	up	-	-
MW0121577	N-(2-(Methylamino)ethyl)-5-isoquinolinesulfonamide	N-(2-(甲基氨基)乙基)-5-异喹啉磺酰胺	Alcohol and amines	醇、胺类	Amines	胺类	C12H15N3O2S	3	0.7196	-	2503.44	4928.27	4316.85	1226.68	1379.85	1694.44	1.30819	0.0715588	0.208493	2.73161	1.44975	up	-	-
MW0131322	CID 131835430	3-(4-羟基-3-甲氧基苯基)-11，19-双（4-羟基苯基)-4，12，20-三氧杂七环[16.6.1.1（2），1（1），（1）（3）.0（2）（1），（2）.0，（2）.0（1、2）]二十七烷-1（25）5，7，9（27）13，15，17（26）21，23-壬烯-7，15，23-三醇	Alcohol and amines	醇、胺类	Alcohols	醇类	C43H32O10	3	0.7162	-	184701	116850	194078	554779	924343	741212	1.3839	0.0277423	0.139926	0.223222	-2.16345	down	-	-
MW0146774	Bis(glycerophospho)glycerol	双（甘油磷酸）甘油	Organic acids	有机酸	Organic acids	有机酸	C9H22O13P2	3	0.7159	-	3965.53	2088.05	3916.04	11444.1	20718.8	4372.53	1.08812	0.200526	0.361056	0.272875	-1.87369	down	C03853	-
MW0128123	[3-(8,8-Dimethyl-2-oxopyrano[2,3-]chromen-3-yl)-2-hydroxy-6-methoxyphenyl] hydrogen sulate	（3-{8,8-二甲基-2-氧代-2H，8H-吡拉诺[2,3-f]铬-3-基]-2-羟基-6-甲氧基苯基）氧化磺酸	Organic acids	有机酸	Organic acids	有机酸	C21H18O9S	3	0.7153	-	55237.7	131964	131346	42499.6	53604.6	26621.1	1.14559	0.114138	0.266901	2.59561	1.37608	up	-	-
MW0130617	2-{2,6-dihydroxy-4-[6-hydroxy-7-(3-methylbut-2-en-1-yl)-1-benzofuran-2-yl]phenyl}-6-(2,4-dihydroxyphenyl)-4-methylcyclohex-3-ene-1-carboxylic acid	2-{2，6-二羟基-4-[6-羟基-7-(3-甲基丁-2-烯-1-基)-1-苯并呋喃-2-基]苯基}-6-(2，4-二羟基苯基)-4-甲基环己-3-烯-1-羧酸	Organic acids	有机酸	Organic acids	有机酸	C33H32O8	3	0.7151	-	20133.4	25963.5	15565.1	57535.2	60635.9	90451.8	1.37015	0.0346841	0.152112	0.295567	-1.75844	down	-	-
MW0131786	3,4,5-trihydroxy-6-[1-(6-hydroxy-2H-1,3-benzodioxol-5-yl)-3-(4-methoxy-1-benzofuran-5-yl)-1,3-dioxopropan-2-yl]oxane-2-carboxylic acid	3，4，5-三羟基-6-[1-(6-羟基-2H-1，3-苯并间二氧杂环戊烯-5-基)-3-(4-甲氧基-1-苯并呋喃-5-基)-1，3-二氧代丙-2-基]恶烷-2-羧酸	Organic acids	有机酸	Organic acids	有机酸	C25H22O13	3	0.714	-	11364.8	28294.8	20556.3	5798.73	8223.96	6593.41	1.25768	0.1114	0.264529	2.92082	1.54637	up	-	-
MEDN0391	3-Deoxy-D-Lyxo-Heptopyran-2-ularic Acid	二十二碳六烯酸	Lipids	脂质	Free fatty acids	游离脂肪酸	C7H10O8	3	0.7132	-	976.33	2200.02	2655.79	9824.05	10525.4	34042.9	1.30213	0.178498	0.338323	0.107223	-3.22131	down	C21044	-
MW0116228	{[1-(6,7-dimethoxy-2H-1,3-benzodioxol-5-yl)-3-oxopropan-2-yl]oxy}sulfonic acid	{[1-(6，7-二甲氧基-2H-1，3-苯并间二氧杂环戊烯-5-基)-3-氧代丙-2-基]氧}磺酸	Organic acids	有机酸	Organic acids	有机酸	C12H14O9S	3	0.7117	-	68906.6	67236.9	68810.3	26068	47868.6	21058.4	1.24136	0.0463487	0.171009	2.15752	1.10937	up	-	-
MW0143477	5-(3,4-Diacetoxybut-1-ynyl)-2,2'-bithiophene	5-(3,4-二乙酰氧基丁-1-炔基)-2,2'-联噻吩	Heterocyclic compounds	杂环化合物	Heterocyclic compounds	杂环化合物	C16H14O4S2	3	0.7092	-	140369	111170	153578	46066.7	50806.5	32689.4	1.38839	0.00902417	0.0907198	3.1268	1.64469	up	C04606	-
MW0109341	Pro-Tyr-Lys	脯氨酰-酪氨酰-赖氨酸	Amino acids and derivatives	氨基酸及其衍生物	Amino acids and derivatives	氨基酸及其衍生物	C20H30N4O5	3	0.709	-	2.76204e+06	3.08303e+06	3.93981e+06	8.42439e+06	6.87488e+06	7.7294e+06	1.38615	0.00186394	0.0629092	0.4249	-1.2348	down	-	-
MW0127700	({6-[2-(3,4-dihydroxyphenyl)-5-hydroxy-4-oxo-8-[3,4,5-trihydroxy-6-(hydroxymethyl)oxan-2-yl]-7-[(3,4,5-trihydroxy-6-methyloxan-2-yl)oxy]-4H-chromen-6-yl]-3,4,5-trihydroxyoxan-2-yl}methoxy)sulfonic acid	（{6-[2-(3，4-二羟基苯基)-5-羟基-4-氧代-8-[3，4，5-三羟基-6-(羟甲基）恶烷-2-基]-7-[（3，4，5-三羟基-6-甲基恶烷-2-基）氧基]-4H-苯并吡喃-6-基]-3，4，5三羟基恶烷2-基}甲氧基）磺酸	Organic acids	有机酸	Organic acids	有机酸	C33H40O23S	3	0.709	-	1462.63	3900.94	3204.82	29436.7	84540	52194.2	1.38529	0.0811537	0.221893	0.0515637	-4.2775	down	-	-
MW0134672	6-({2,4-dihydroxy-2-[(3-hydroxyphenyl)methyl]-3-oxo-2,3-dihydro-1-benzofuran-6-yl}oxy)-3,4,5-trihydroxyoxane-2-carboxylic acid	6-({2，4-二羟基-2-[（3-羟基苯基）甲基]-3-氧代-2，3-二氢-1-苯并呋喃-6-基}氧基)-3，4，5-三羟基恶烷-2-羧酸	Organic acids	有机酸	Organic acids	有机酸	C21H20O12	3	0.7075	-	6833.3	3112.3	6005.52	19992.6	24175.1	7877.95	1.15267	0.126437	0.280542	0.306483	-1.70612	down	-	-
MW0167095	(2Z,4E)-5-(3,8-dihydroxy-1,5-dimethyl-6-oxabicyclo[3.2.1]octan-8-yl)-3-methylpenta-2,4-dienoic acid	(2Z,4E)-5-(3,8-dihydroxy-1,5-dimethyl-6-oxabicyclo[3.2.1]octan-8-yl)-3-methylpenta-2,4-dienoic acid	Organic acids	有机酸	Organic acids	有机酸	C15H22O5	3	0.7067	-	4078.1	6866.67	2811.28	3060.08	876.8	1634.25	1.0572	0.136456	0.291876	2.46917	1.30402	up	-	-
MW0112628	3,4,5-trihydroxy-6-{[4-methoxy-6-(3-oxopropyl)-2H-1,3-benzodioxol-5-yl]oxy}oxane-2-carboxylic acid	3，4，5-三羟基-6-{[4-甲氧基-6-(3-氧代丙基)-2H-1，3-苯并间二氧杂环戊烯-5-基]氧基}恶烷-2-羧酸	Organic acids	有机酸	Organic acids	有机酸	C17H20O11	3	0.7046	-	74463.2	64247.4	86758	38250.4	36136.4	24842.3	1.34822	0.00869182	0.0888327	2.2722	1.18409	up	-	-
MW0132351	3,4,5-trihydroxy-6-{2-hydroxy-4-[(2,4,6-trihydroxy-3-oxo-2,3-dihydro-1-benzofuran-2-yl)methyl]phenoxy}oxane-2-carboxylic acid	3，4，5-三羟基-6-{2-羟基-4-[（2，4，6-三羟基-3-氧代-2，3-二氢-1-苯并呋喃-2-基）甲基]苯氧基}恶烷-2-羧酸	Organic acids	有机酸	Organic acids	有机酸	C21H20O13	3	0.7001	-	21256.7	14346.1	18089.9	117800	111247	28374.3	1.19025	0.141593	0.298025	0.208579	-2.26133	down	-	-
MW0139605	Rotenonic acid, methyl ether	戊烯酸，甲醚	Organic acids	有机酸	Organic acids	有机酸	C24H26O6	3	0.7	-	472703	459421	443039	149675	137284	112411	1.42864	3.13032e-05	0.0180449	3.44333	1.7838	up	-	-
MW0127836	(2-{[6-({[(2E)-3-(3,4-dihydroxyphenyl)prop-2-enoyl]oxy}methyl)-3,4,5-trihydroxyoxan-2-yl]oxy}-4-hydroxy-2,5-bis(hydroxymethyl)oxolan-3-yl)oxidanesulfonic acid	（2-{[6-({[（2E)-3-(3，4-二羟基苯基）丙-2-烯酰基]氧基}甲基)-3，4，5-三羟基恶烷-2-基]氧基}-4-羟基-2，5-双（羟甲基）氧杂环戊烷-3-基）氧杂磺酸	Organic acids	有机酸	Organic acids	有机酸	C21H28O17S	3	0.6997	-	13039.6	12450	8659.8	33547	29316.2	38932.5	1.39299	0.00589439	0.0805574	0.33547	-1.57575	down	-	-
MW0105686	L-Arginyl-L-arginyl-L-arginine	L-精氨酰-L-精氨酰-L-精氨酸	Amino acids and derivatives	氨基酸及其衍生物	Amino acids and derivatives	氨基酸及其衍生物	C18H38N12O4	3	0.6964	-	2545.08	1344.98	1395.61	4058.53	5894.87	4955.84	1.32541	0.0101376	0.0958014	0.354523	-1.49605	down	-	-
MW0129423	{8-[2-(acetyloxy)propan-2-yl]-2-oxo-2H,8H,9H-furo[2,3-h]chromen-9-yl}oxidanesulfonic acid	{8-[2-(乙酰氧基）丙-2-基]-2-氧代-2H，8H，9H-呋喃并[2，3-h]苯并吡喃-9-基}氧烷磺酸	Organic acids	有机酸	Organic acids	有机酸	C16H16O9S	3	0.6962	-	19802.5	37539.8	62122.9	10318.6	4219.1	10290	1.25481	0.120172	0.274138	4.81176	2.26657	up	-	-
MW0130954	3-(2,3,4,5-tetrahydroxyphenyl)-1-(2,4,6-trihydroxyphenyl)propane-1,2-dione	3-(2，3，4，5-四羟基苯基)-1-(2，4，6-三羟基苯基)-1，2-丙二酮	Others	其它类	Ketone compounds	酮类化合物	C15H12O9	3	0.6958	-	31706.1	29639.2	27186.1	15188.9	20206.2	4120.88	1.02997	0.0661254	0.200537	2.24039	1.16375	up	-	-
MW0131611	3,4,5-trihydroxy-6-({7-methoxy-4-oxo-6-[3,4,5-trihydroxy-6-(hydroxymethyl)oxan-2-yl]-2-(2,4,5-trihydroxyphenyl)-4H-chromen-5-yl}oxy)oxane-2-carboxylic acid	3，4，5-三羟基-6-({7-甲氧基-4-氧代-6-[3，4，5-三羟基-6-(羟甲基）恶烷-2-基]-2-(2，4，5三羟基苯基)-4H-色烯-5-基}氧基）恶烷-2-羧酸	Organic acids	有机酸	Organic acids	有机酸	C28H30O18	3	0.6957	-	15937.1	10664.7	21651.8	5858	5941.77	4098.68	1.32461	0.0719477	0.20904	3.03511	1.60175	up	-	-
MW0109484	Pyroglutamylmethionine	焦谷氨酰甲硫氨酸	Amino acids and derivatives	氨基酸及其衍生物	Amino acids and derivatives	氨基酸及其衍生物	C10H16N2O4S	3	0.6956	-	3402.27	14042.4	13096.1	20615.9	19932.1	26838.3	1.02345	0.047322	0.172621	0.453219	-1.14172	down	-	-
MW0106919	Glu-Phe-Lys	谷氨酸-苯丙氨酸-赖氨酸	Amino acids and derivatives	氨基酸及其衍生物	Amino acids and derivatives	氨基酸及其衍生物	C20H30N4O6	3	0.6918	-	2113.08	9959.9	21840.3	95271.1	67683.2	165076	1.24936	0.072225	0.20945	0.103385	-3.27391	down	-	-
MEDP2118	2,3-Bis(4-hydroxyphenyl)propionitrile	2,3-双（4-羟基苯基）丙腈	Benzene and substituted derivatives	苯及其衍生物	Benzene and substituted derivatives	苯及其衍生物	C15H13NO2	3	0.6911	-	26276.1	100373	70345.7	163686	161353	713946	1.11182	0.265444	0.423252	0.189603	-2.39894	down	-	-
MW0130230	2-(3,7-dimethylocta-2,6-dien-1-yl)-4-[(2E)-1-hydroxy-3-(4-hydroxyphenyl)prop-2-en-1-yl]benzene-1,3,5-triol	3-(4-羟基苯基)-1-[2，4，6-三羟基-3-(4-羟基-3，7-二甲基-2，6-二烯-1-基）苯基]-1-丙酮	Others	其它类	Others	其它	C25H30O5	3	0.6906	-	73439.5	59581	76579.3	9377.61	18989	13916.3	1.39383	0.00237124	0.0669726	4.95708	2.30949	up	-	-
MW0135872	6-{[3-(3,4-dihydroxy-5-methoxyphenyl)prop-2-enoyl]oxy}-3,4,5-trihydroxyoxane-2-carboxylic acid	3-[3-羟基-5-甲氧基-4-(磺氧基）苯基]丙-2-烯酸	Benzene and substituted derivatives	苯及其衍生物	Benzene and substituted derivatives	苯及其衍生物	C16H18O11	3	0.6905	-	102135	181281	267592	66962.4	53351.1	48048.5	1.28072	0.114388	0.267112	3.27276	1.71051	up	-	-
MW0145361	Arg-Gly-His	L-精氨酰-甘氨酰-L-组氨酸	Amino acids and derivatives	氨基酸及其衍生物	Amino acids and derivatives	氨基酸及其衍生物	C14H24N8O4	3	0.6884	-	3998.42	1366.4	838.28	14293.4	19938	14884.7	1.33618	0.00538578	0.0790937	0.126295	-2.98514	down	-	-
ZINC95914243	(1R,2R,3R,4R)-1-[(R)-1,5-Dimethyl-1-hydroxy-4-hexenyl]-4-methylcyclohexane-1,2,3,4-tetrol 3-acetate	[（1R，2R，5R，6R)-2，5，6-三羟基-5-[（2R)-2-羟基-6-甲基庚-5-烯-2-基]-2-甲基环己基]乙酸酯	Others	其它类	Lactones	内酯类化合物	C17H30O6	3	0.6871	-	2245.91	11080.4	6397.46	19242.9	21376.5	18021.2	1.16036	0.0247908	0.134223	0.336351	-1.57196	down	-	-
MW0154634	N-Phospho-D-lombricine	N-磷酸-D-水杨酸	Organic acids	有机酸	Organic acids	有机酸	C6H16N4O9P2	3	0.6866	-	8041.99	9178.91	7163.39	22390.9	9869.94	22155.5	1.15147	0.133901	0.289785	0.448106	-1.15809	down	C02855	ko00470,ko01100
MW0154041	Myxochromide S2	粘铬化物 S2	Alcohol and amines	醇、胺类	Amines	胺类	C39H56N6O8	3	0.6854	-	995.11	2677.87	1969.42	12468.1	9104.46	31230.9	1.32271	0.14915	0.306898	0.106857	-3.22625	down	-	-
MW0131736	(2S,3S,4S,5R,6S)-3,4,5-trihydroxy-6-(4-methyl-2-oxochromen-7-yl)oxyoxane-2-carboxylic acid	3,4,5-三羟基-6-[（4-甲基-2-氧代-2H-铬-7-基）氧]氧烷-2-羧酸	Organic acids	有机酸	Organic acids	有机酸	C16H16O9	3	0.6844	-	23471.1	46385.4	33684.5	56702.8	67752.1	90838.6	1.21587	0.0442738	0.167698	0.48093	-1.0561	down	-	-
MW0127779	1,7-Bis(4-hydroxyphenyl)-5-hydroxy-1-heptene-3-one	（1E)-5-羟基-1,7-双（4-羟基苯基）庚-1-烯-3-酮	Others	其它类	Ketone compounds	酮类化合物	C19H20O4	3	0.6826	-	4332.8	11611.8	2429.36	31698.5	37832	61982.2	1.31158	0.0453168	0.169385	0.139713	-2.83947	down	-	-
MW0152272	Leu-Asp-Val-Lys-His	Leu-Asp-Val-Lys-His	Amino acids and derivatives	氨基酸及其衍生物	Amino acids and derivatives	氨基酸及其衍生物	C27H46N8O8	3	0.6798	-	124183	72508.3	77585.9	34260.2	30375.9	19904.2	1.33716	0.0534682	0.181451	3.24433	1.69792	up	-	-
MW0128573	[2-(methoxymethyl)-5-(3,5,7-trihydroxy-3,4-dihydro-2H-1-benzopyran-2-yl)phenyl]oxidanesulfonic acid	[2-(甲氧基甲基)-5-(3，5，7-三羟基-3，4-二氢-2H-1-苯并吡喃-2-基）苯基]氧代磺酸	Organic acids	有机酸	Organic acids	有机酸	C17H18O9S	3	0.6781	-	187611	213663	184377	45431	47243.9	35929.3	1.43058	0.00136477	0.0555484	4.5539	2.1871	up	-	-
MW0131643	3,4,5-trihydroxy-6-(3-{3,5,6,7-tetrahydroxy-8-[3,4,5-trihydroxy-6-(hydroxymethyl)oxan-2-yl]-3,4-dihydro-2H-1-benzopyran-2-yl}phenoxy)oxane-2-carboxylic acid	3，4，5-三羟基-6-(3-{3，5，6，7-四羟基-8-[3，4，5-三羟基-6-(羟甲基）恶烷-2-基]-3，4-二氢-2H-1-苯并吡喃-2-基}苯氧基）恶烷-2-羧酸	Organic acids	有机酸	Organic acids	有机酸	C27H32O17	3	0.6762	-	135087	47277.9	135190	34347.2	19663.4	10429.4	1.23348	0.0951578	0.242375	4.92792	2.30098	up	-	-
MW0132045	3,4,5-trihydroxy-6-{[3,5,7-trihydroxy-2-(3-hydroxyphenyl)-4-oxo-4H-chromen-6-yl]oxy}oxane-2-carboxylic acid	3，4，5-三羟基-6-{[3，5，7-三羟基-2-(3-羟基苯基)-4-氧代-4H-苯并吡喃-6-基]氧}氧杂环己烷-2-羧酸	Organic acids	有机酸	Organic acids	有机酸	C21H18O13	3	0.6726	-	4317.6	2295.78	8558.25	42.26	42.26	42.26	1.42554	0.112914	0.265816	119.669	6.90291	up	-	-
MW0112679	3,4,5-trihydroxy-6-{4-[(1Z)-2-methyl-3-oxoprop-1-en-1-yl]phenoxy}oxane-2-carboxylic acid	3，4，5-三羟基-6-{4-[（1Z)-2-甲基-3-氧代丙-1-烯-1-基]苯氧基}恶烷-2-羧酸	Organic acids	有机酸	Organic acids	有机酸	C16H18O8	3	0.6715	-	113689	152070	221229	651072	1.00556e+06	1.15618e+06	1.38199	0.0308287	0.145918	0.173132	-2.53006	down	-	-
MW0154307	Naringenin-7-O--D-Glucuronide	Naringenin-7-O--D-Glucuronide	Flavonoids	黄酮	Flavones	黄酮	C21H20O11	3	0.6706	-	30987.7	17693.2	27195.5	4635.15	5861.69	2826.29	1.37811	0.0292155	0.142445	5.69509	2.50972	up	-	-
MW0001018	{[3-(3,4-dihydroxyphenyl)-1-methoxy-1-oxopropan-2-yl]oxy}sulfonic acid	{[3-(3，4-二羟基苯基)-1-甲氧基-1-氧代丙-2-基]氧基}磺酸	Phenolic acids	酚酸类	Phenolic acids	酚酸类	C10H12O8S	3	0.6676	-	144674	184594	178940	15429	34357	16093.2	1.39721	0.00199143	0.0632894	7.71425	2.94753	up	-	-
MW0135910	6-[3,5-Dihydroxy-2-(3-hydroxy-2,2-dimethyl-3,4-dihydrochromen-6-yl)-4-oxochromen-7-yl]oxy-3,4,5-trihydroxyoxane-2-carboxylic acid	6-{[3，5-二羟基-2-(3-羟基-2，2-二甲基-3，4-二氢-2H-1-苯并吡喃-6-基)-4-氧代-4H-苯并吡喃-7-基]氧}-3，4，5-三羟基氧杂环己烷-2-羧酸	Organic acids	有机酸	Organic acids	有机酸	C26H26O13	3	0.6674	-	29324.1	31793.8	42612	6121.58	10950.2	11472.4	1.36181	0.0147037	0.109687	3.63401	1.86156	up	-	-
MW0166457	Guaiacol beta-primeveroside	愈创木酚 β-primeveroside	Alcohol and amines	醇、胺类	Alcohols	醇类	C18H26O11	3	0.6673	-	11999.6	11483.5	3140.91	26946	24768.2	35090.6	1.20087	0.00939479	0.0923556	0.30671	-1.70505	down	-	-
MW0132256	3,4,5-trihydroxy-6-{[7-methoxy-3-(3-methoxyphenyl)-8-methyl-4-oxo-4H-chromen-5-yl]oxy}oxane-2-carboxylic acid	3，4，5-三羟基-6-{[7-甲氧基-3-(3-甲氧基苯基)-8-甲基-4-氧代-4H-苯并吡喃-5-基]氧}恶烷-2-羧酸	Organic acids	有机酸	Organic acids	有机酸	C24H24O11	3	0.6666	-	49453.4	36805.8	21770.6	13913.6	18938.6	12192.7	1.20188	0.111973	0.264943	2.39827	1.26199	up	-	-
MW0145513	Arg-Thr-Cys	L-精氨酰-L-苏氨酰-L-半胱氨酸	Amino acids and derivatives	氨基酸及其衍生物	Amino acids and derivatives	氨基酸及其衍生物	C13H26N6O5S1	3	0.6665	-	64315.6	99958.9	55073.1	188877	239859	181649	1.35215	0.00589831	0.0805574	0.35936	-1.4765	down	-	-
MW0151768	Iridodial glucoside tetraacetate	环烯醚萜二苷四乙酸酯	Heterocyclic compounds	杂环化合物	Heterocyclic compounds	杂环化合物	C24H34O11	3	0.6648	-	12646.7	12807.2	14122.8	28119.1	46468.2	32866.6	1.37675	0.0533405	0.181451	0.368314	-1.44099	down	-	-
MW0127736	({8-[2-(2,4-dihydroxyphenyl)-5,7-dihydroxy-6-(3-methylbut-2-en-1-yl)-4-oxo-3,4-dihydro-2H-1-benzopyran-3-yl]-2,6-dimethylocta-2,6-dien-4-yl}oxy)sulfonic acid	6-{4-[3-(3，7-二甲基辛-2，6-二烯-1-基)-6-[（3，3-二甲基环氧乙烷-2-基）甲基]-5，7-二羟基-4-氧代-3，4-二氢-2H-1-苯并吡喃-2-基]-3-羟基苯氧基}-3，4，5-三羟基恶烷-2-羧酸	Others	其它类	Others	其它	C30H36O10S	3	0.664	-	15840.8	18266.3	20427.3	4777.21	9079.77	3405.69	1.30027	0.00546089	0.0790937	3.15909	1.65951	up	-	-
MW0136576	6-{5-carboxy-2-hydroxy-3-[2,4,5-trihydroxy-3-(3,4,5-trihydroxybenzoyloxy)benzoyloxy]phenoxy}-3,4,5-trihydroxyoxane-2-carboxylic acid	6-{5-羧基-2-羟基-3-[2，4，5-三羟基-3-(3，4，5-三羟基苯甲酰氧基）苯甲酰氧基]苯氧基}-3，4-三羟基恶烷-2-羧酸	Organic acids	有机酸	Organic acids	有机酸	C27H22O20	3	0.6632	-	7536.92	53209.6	23258.8	715.24	1954.13	11169.5	1.05969	0.218494	0.379137	6.07026	2.60176	up	-	-
MW0117343	Ribocil	Ribocil	Heterocyclic compounds	杂环化合物	Heterocyclic compounds	杂环化合物	C19H22N6OS	3	0.6604	-	712.29	1045.48	627.34	1411.5	2407.28	1689.99	1.28103	0.0556495	0.183782	0.432966	-1.20767	down	-	-
MW0112393	CID 76120403	3，4，5-三羟基-6-(4-羟基苯甲酰氧基）恶烷-2-羧酸	Organic acids	有机酸	Organic acids	有机酸	C13H14O9	3	0.6579	-	165301	126312	165244	62297.7	78950.4	20280.1	1.16905	0.0127432	0.104116	2.82834	1.49995	up	-	-
MW0154781	Osthenol-7-O-beta-D-gentiobioside	Osthenol-7-O-BETA-D-龙胆二糖苷	Benzene and substituted derivatives	苯及其衍生物	Benzene and substituted derivatives	苯及其衍生物	C26H34O13	3	0.6556	-	146372	141807	109511	352631	212140	436950	1.27975	0.0874383	0.231176	0.397008	-1.33276	down	C17476	-
MW0147251	(+)-catechin 7-O-beta-D-xyloside	儿茶素7-O-BETA-D-木糖苷	Flavonoids	黄酮	Flavones	黄酮	C20H22O10	3	0.6549	-	204013	187142	224395	97233.2	101663	102333	1.42734	0.00921609	0.0918335	2.04346	1.03101	up	C09617	-
MW0135502	6-[4-({[2-(3,4-dihydroxyphenyl)-5,7-dihydroxy-3,4-dihydro-2H-1-benzopyran-3-yl]oxy}carbonyl)-2,6-dihydroxyphenoxy]-3,4,5-trihydroxyoxane-2-carboxylic acid	6-[4-({[2-(3，4-二羟基苯基)-5，7-二羟基-3，4-二氢-2H-1-苯并吡喃-3-基]氧基}羰基)-2，6-二羟基苯氧基]-3，4，5-三羟基恶烷-2-羧酸	Organic acids	有机酸	Organic acids	有机酸	C28H26O16	3	0.6541	-	238526	575548	429574	180353	222607	158193	1.15742	0.140427	0.296307	2.21624	1.14811	up	-	-
MW0135485	6-[3,5-dihydroxy-2-(3-methylbut-2-en-1-yl)-6-[3-(2,4,5-trihydroxyphenyl)propanoyl]phenoxy]-3,4,5-trihydroxyoxane-2-carboxylic acid	6-[3，5-二羟基-2-(3-甲基丁-2-烯-1-基)-6-[3-(2，4，5-三羟基苯基）丙酰基]苯氧基]-3，4，5-三羟基恶烷-2-羧酸	Organic acids	有机酸	Organic acids	有机酸	C26H30O13	3	0.6525	-	80969.3	36974.4	45522.5	29448.2	21603.6	13721.7	1.17859	0.123218	0.277405	2.52366	1.33552	up	-	-
MW0144518	Ala-Asp-Phe-Asp	Ala-Asp-Phe-Asp	Amino acids and derivatives	氨基酸及其衍生物	Amino acids and derivatives	氨基酸及其衍生物	C20H26N4O9	3	0.6525	-	472120	682846	635968	128603	97522.1	82968.3	1.41725	0.0133488	0.106297	5.79415	2.5346	up	-	-
MW0128613	[2-hydroxy-5-(3,5,6-trihydroxy-4-oxo-7-{[3,4,5-trihydroxy-6-(hydroxymethyl)oxan-2-yl]oxy}-4H-chromen-2-yl)phenyl]oxidanesulfonic acid	[2-羟基-5-(3，5，6-三羟基-4-氧代-7-{[3，4，5-三羟基-6-(羟甲基）恶烷-2-基]氧}-4H-苯并吡喃-2-基）苯基]氧代磺酸	Organic acids	有机酸	Organic acids	有机酸	C21H20O16S	3	0.6514	-	4095.38	2382.8	2705.33	833.05	1892.33	195.44	1.06062	0.044653	0.168447	3.14415	1.65267	up	-	-
MW0128777	[4,5-dihydroxy-2-({7-oxo-7H-furo[3,2-g]chromen-9-yl}oxy)oxan-3-yl]oxidanesulfonic acid	[4，5-二羟基-2-({7-氧代-7H-呋喃并[3，2-g]苯并吡喃-9-基}氧基）氧杂环己烷-3-基]氧代磺酸	Organic acids	有机酸	Organic acids	有机酸	C16H14O11S	3	0.6512	-	178481	269327	389944	90113.9	107764	81680.2	1.31767	0.0911811	0.237009	2.9967	1.58337	up	-	-
MW0135832	6-{[2-(3,4-dihydroxyphenyl)-8-[1-(2,4-dihydroxyphenyl)-3-(3,4-dihydroxyphenyl)-2-hydroxypropyl]-3,5-dihydroxy-3,4-dihydro-2H-1-benzopyran-7-yl]oxy}-3,4,5-trihydroxyoxane-2-carboxylic acid	6-{2-(3,4-二羟苯基)-8-[1-(2,4-二羟苯基)-3-(3,4-二羟苯基)-2-羟丙基]-3,5-二羟基-3,4-二氢-2H-1-苯并吡喃-7-基]氧]-3,4,5-三羟基氧烷-2-羧酸	Organic acids	有机酸	Organic acids	有机酸	C36H36O17	3	0.6494	-	85604.7	51389.5	60218.6	25115.2	22176.3	15570.3	1.35485	0.0405312	0.160192	3.13724	1.6495	up	-	-
MW0012877	NCGC00169922-02_C36H58O10_beta-D-Glucopyranose, 1-O-[(2alpha,3beta,5xi,9xi,18xi,19alpha)-2,3,19-trihydroxy-28-oxoolean-12-en-28-yl]-	NCGC00169922-02_C36H58O10_beta-D-Glucopyranose, 1-O-[(2alpha,3beta,5xi,9xi,18xi,19alpha)-2,3,19-trihydroxy-28-oxoolean-12-en-28-yl]-	FA	脂肪酰类	Others	其它	C36H58O10	3	0.6471	-	6803.67	6720.63	6613.15	10239.1	33310.8	10492.1	1.04939	0.277573	0.433212	0.372626	-1.4242	down	-	-
MW0135686	6-[[2-(2,4-dihydroxyphenyl)-3-[(2Z)-3,7-dimethylocta-2,6-dienyl]-5-hydroxy-6-(3-methylbut-2-enyl)-4-oxo-2,3-dihydrochromen-7-yl]oxy]-3,4,5-trihydroxyoxane-2-carboxylic acid	6-{[2-(2，4-二羟基苯基)-3-(3，7-二甲基辛-2，6-二烯-1-基)-7-羟基-6-(3-甲基丁-2-烯-1-基)-4-氧代-3，4-二氢-2H-1-苯并吡喃-5-基]氧基}-3，4，5-三羟基恶烷-2-羧酸	Organic acids	有机酸	Organic acids	有机酸	C36H44O12	3	0.6441	-	44856.7	30430.5	35116.4	18319.5	16883.5	12550.5	1.34609	0.0258875	0.136464	2.31195	1.20911	up	-	-
MW0130771	2-hydroxy-2-(4-hydroxyphenyl)ethyl 3-(3,4-dihydroxyphenyl)prop-2-enoate	2-羟基-2-(4-羟基苯基）乙基3-(2,4-二羟基-3-甲氧基苯基）丙-2-烯酸盐	Others	其它类	Lactones	内酯类化合物	C17H16O6	3	0.6437	-	110716	161054	171089	567929	589079	776594	1.40545	0.0123707	0.103424	0.229034	-2.12637	down	-	-
MW0145343	Arg-Glu-Asp-Arg	Arg-Glu-Asp-Arg	Amino acids and derivatives	氨基酸及其衍生物	Amino acids and derivatives	氨基酸及其衍生物	C21H38N10O9	3	0.6428	-	44565.8	29616.3	12693.8	12365.9	9825.59	8112.47	1.1055	0.175025	0.33448	2.86681	1.51945	up	-	-
MW0124747	Mangiferin	芒果苷	Flavonoids	黄酮	Other Flavonoids	其它类黄酮	C19H18O11	3	0.6423	-	11818.3	102668	64698.4	209809	206457	192178	1.09793	0.028129	0.140311	0.294496	-1.76368	down	C10077	-
MW0136179	6-{2-[3-(3,5-dihydroxyphenyl)-2-oxopropanoyl]-3,4,5-trihydroxyphenoxy}-3,4,5-trihydroxyoxane-2-carboxylic acid	6-{2-[3-(3，5-二羟基苯基)-2-氧代丙酰基]-3，4，5-三羟基苯氧基}-3，4，5-三羟基恶烷-2-羧酸	Organic acids	有机酸	Organic acids	有机酸	C21H20O14	3	0.642	-	29441.5	30315	17549.5	4339.21	5499.42	3583.72	1.39701	0.0334099	0.149491	5.75951	2.52595	up	-	-
MW0054467	Lyciumoside IV	枸杞苷四	Nucleotides and derivatives	核苷酸及其衍生物	Nucleotides and derivatives	核苷酸及其衍生物	C38H64O16	3	0.6419	-	23480.2	22070.8	28991.5	52262.3	41151.2	56111.8	1.35421	0.0170719	0.115809	0.498528	-1.00425	down	-	-
MW0054718	4-(1,3-Butadienyl)-3,5,5-trimethylcyclohex-2-en-1-one	靛蓝胭脂红	Others	其它类	Aldehyde compounds	醛类化合物	C13H18O	3	0.6412	-	24842.2	11299.1	26697.9	61347.1	48138.3	192350	1.17767	0.224618	0.384443	0.20819	-2.26402	down	-	-
MW0127706	({6-[5,7-dihydroxy-2-(3-hydroxy-4-methoxyphenyl)-4-oxo-3-[3,4,5-trihydroxy-6-(hydroxymethyl)oxan-2-yl]-4H-chromen-8-yl]-3,4,5-trihydroxyoxan-2-yl}methoxy)sulfonic acid	（{6-[5，7-二羟基-2-(3-羟基-4-甲氧基苯基)-4-氧代-3-[3，4，5-三羟基-6-(羟甲基）恶烷-2-基]-4H-苯并吡喃-8-基]-3，4，5-三羟基恶烷-2-基}甲氧基）磺酸	Organic acids	有机酸	Organic acids	有机酸	C28H32O19S	3	0.6409	-	103904	76102.7	102742	8904.61	16025.2	886.86	1.23339	0.00398673	0.0722456	10.9522	3.45315	up	-	-
MW0110188	Tyr-Asn-Lys	酪氨酸-天冬酰胺-赖氨酸	Amino acids and derivatives	氨基酸及其衍生物	Amino acids and derivatives	氨基酸及其衍生物	C19H29N5O6	3	0.64	-	129625	150779	170853	343283	355078	413877	1.40784	0.00268891	0.0669726	0.40572	-1.30144	down	-	-
MW0136049	6-{[6-(3,4-dihydroxy-6-methyl-5-oxooxan-2-yl)-7-hydroxy-4-oxo-2-phenyl-4H-chromen-5-yl]oxy}-3,4,5-trihydroxyoxane-2-carboxylic acid	6-{[6-(3,4-二羟基-6-甲基-5-氧代恶烷-2-基)-7-羟基-4-氧代-2-苯基-4H-铬-5-基]氧基} -3 ，4,5-三羟基恶烷-2-羧酸	Organic acids	有机酸	Organic acids	有机酸	C27H26O14	3	0.6399	-	3638.04	12288.6	3867.8	99991	93863.8	268802	1.3729	0.123105	0.277309	0.0427842	-4.54678	down	-	-
MW0113484	6-[3-(2-carboxyeth-1-en-1-yl)-4-hydroxyphenoxy]-3,4,5-trihydroxyoxane-2-carboxylic acid	6-[2-(2-羧基乙-1-烯-1-基)-4-羟基苯氧基]-3，4，5-三羟基氧烷-2-羧酸	Benzene and substituted derivatives	苯及其衍生物	Benzene and substituted derivatives	苯及其衍生物	C15H16O10	3	0.6391	-	37103.5	64349.8	54334.6	8864.65	15004.3	22870.6	1.28485	0.027222	0.139108	3.3331	1.73687	up	-	-
MW0136513	6-{4-carboxy-2-hydroxy-6-[2,4,5-trihydroxy-3-(3,4,5-trihydroxybenzoyloxy)benzoyloxy]phenoxy}-3,4,5-trihydroxyoxane-2-carboxylic acid	6-{4-羧基-2-羟基-6-[2，4，5-三羟基-3-(3，4，5-三羟基苯甲酰氧基）苯甲酰氧基]苯氧基}-3，4-三羟基恶烷-2-羧酸	Organic acids	有机酸	Organic acids	有机酸	C27H22O20	3	0.638	-	41626.7	43693.8	55310.3	21572.2	8339.87	6307.47	1.28706	0.00578748	0.0805574	3.88274	1.95707	up	-	-
MW0135553	Naringenin-4'-o-beta-d-glucuronide	Naringenin-4'-o-beta-d-glucuronide	Flavonoids	黄酮	Chalcones	查耳酮	C21H20O11	3	0.637	-	261465	236381	295295	77820.3	84326.6	27289.1	1.30268	0.00127518	0.0554745	4.18686	2.06587	up	-	-
MW0135440	6-[2,6-dihydroxy-4-(3,5,7-trihydroxy-4-oxo-3,4-dihydro-2H-1-benzopyran-2-yl)phenoxy]-3,4,5-trihydroxyoxane-2-carboxylic acid	6-[2，6-二羟基-4-(3，5，7-三羟基-4-氧代-3，4-二氢-2H-1-苯并吡喃-2-基）苯氧基]-3，4，5-三羟基恶烷-2-羧酸	Organic acids	有机酸	Organic acids	有机酸	C21H20O14	3	0.6354	-	257759	201033	303924	54044.5	36353.4	37615.8	1.41759	0.0164423	0.113467	5.95808	2.57485	up	-	-
MW0128696	[3,5-dihydroxy-2-({7-oxo-7H-furo[3,2-g]chromen-9-yl}oxy)oxan-4-yl]oxidanesulfonic acid	[3，5-二羟基-2-({7-氧代-7H-呋喃并[3，2-g]苯并吡喃-9-基}氧基）氧烷-4-基]氧代磺酸	Organic acids	有机酸	Organic acids	有机酸	C16H14O11S	3	0.6335	-	853372	876731	958706	437223	473856	225062	1.27963	0.0120732	0.102917	2.36661	1.24282	up	-	-
MW0128607	[8-(2-hydroxy-1-sulooxypropan-2-yl)-2-oxo-8,9-dihydrouro[2,3-h]chromen-9-yl] (E)-2-methylbut-2-enoate	[2-羟基-2-(9-{[（2E)-2-甲基丁-2-烯酰基]氧基}-2-氧代-2H，8H，9H-呋喃并[2，3-h]苯并吡喃-8-基）丙氧基]磺酸	Organic acids	有机酸	Organic acids	有机酸	C19H20O10S	3	0.6308	-	440234	929823	1.10192e+06	154311	251928	348127	1.22354	0.0923622	0.238354	3.27689	1.71233	up	-	-
MW0134719	6-({3-[(6-carboxy-3,4,5-trihydroxyoxan-2-yl)oxy]-2-(3,4-dihydroxyphenyl)-7-hydroxy-4-oxo-4H-chromen-5-yl}oxy)-3,4,5-trihydroxyoxane-2-carboxylic acid	6-({3-[（6-羧基-3，4，5-三羟基恶烷-2-基）氧基]-2-(3，4-二羟基苯基)-7-羟基-4-氧代-4H-色烯-5-基}氧基)-3，4，5-三羟基恶烷-2-羧酸	Organic acids	有机酸	Organic acids	有机酸	C27H26O19	3	0.6278	-	19436.9	11570	20767.5	2615.31	312.54	1924.43	1.28338	0.0267322	0.13778	10.6701	3.41551	up	-	-
MW0147661	9-(1,3-benzodioxol-5-yl)-4-[(3R,4R,5R)-3-hydroxy-4,5-dimethoxy-tetrahydropyran-2-yl]oxy-6,7-dimethoxy-3H-benzo[f]isobenzofuran-1-one	Cleistanthin?A	Lignans and Coumarins	木脂素和香豆素	Lignans	木脂素	C28H28O11	3	0.6273	-	73066.5	44206.7	58036	5692.98	8603.71	1125.41	1.30592	0.0182871	0.119649	11.3674	3.50683	up	C10548	-
MW0151211	HoPhe-Asp-OH	HoPhe-Asp-OH	Others	其它类	Lactones	内酯类化合物	C19H18N2O8	3	0.6258	-	31788.1	51964.2	50532.7	71887.3	213039	132067	1.20169	0.144528	0.30167	0.322032	-1.63472	down	-	-
MW0132453	3,4,5-trihydroxy-6-{3-hydroxy-5-[(E)-2-(4-{[3,4,5-trihydroxy-6-(hydroxymethyl)oxan-2-yl]oxy}phenyl)ethenyl]phenoxy}oxane-2-carboxylic acid	3，4，5-三羟基-6-{3-羟基-5-[（E)-2-(4-{[3，4，5-三羟基-6-(羟甲基）恶烷-2-基]氧基}苯基）乙烯基]苯氧基}恶烷-2-羧酸	Organic acids	有机酸	Organic acids	有机酸	C26H30O14	3	0.6254	-	74885.9	111280	102336	11308.3	29308.9	12895.5	1.35559	0.00775673	0.0850856	5.3913	2.43063	up	-	-
MW0130513	2-[(3-amino-2-oxo-2H-chromen-4-yl)amino]benzoic acid	2-[(3-氨基-2-氧代-2H-色烯-4-基)氨基]苯甲酸	Organic acids	有机酸	Organic acids	有机酸	C16H12N2O4	3	0.6254	-	26744.3	45358.8	26581.6	13397.2	11836.2	16468.7	1.29717	0.0866799	0.230154	2.36642	1.24271	up	-	-
MW0151683	Ile-Phe	L-异亮氨酸-L-苯丙氨酸	Amino acids and derivatives	氨基酸及其衍生物	Amino acids and derivatives	氨基酸及其衍生物	C15H22N2O3	3	0.6231	-	889291	494893	452228	264721	294017	353862	1.18064	0.15314	0.312339	2.01228	1.00883	up	-	-
MW0153781	Met-HoPhe-OH	Met-HoPhe-OH	Heterocyclic compounds	杂环化合物	Heterocyclic compounds	杂环化合物	C20H22N2O6S	3	0.6198	-	282410	192557	137912	74304.1	142374	36968	1.07099	0.0895857	0.234592	2.41628	1.27279	up	-	-
MW0136338	6-{3-[3,4-dihydroxy-5-(3,4,5-trihydroxybenzoyloxy)benzoyloxy]-4,5-dihydroxybenzoyloxy}-3,4,5-trihydroxyoxane-2-carboxylic acid	6-{3-[3，4-二羟基-5-(3，4，5-三羟基苯甲酰氧基）苯甲酰氧基]-4，5-二羟基苯甲氧基}-3，4，5-三羟基恶烷-2-羧酸	Organic acids	有机酸	Organic acids	有机酸	C27H22O19	3	0.6198	-	248871	346153	225479	27584.1	36465.4	97317.9	1.3095	0.0118417	0.102424	5.08469	2.34616	up	-	-
MW0128928	{[1-(2,4-dihydroxyphenyl)-3-(3,4-dihydroxyphenyl)-1-[3,5,7-trihydroxy-2-(3-hydroxyphenyl)-3,4-dihydro-2H-1-benzopyran-8-yl]propan-2-yl]oxy}sulfonic acid	{[1-(2,4-二羟苯基)-3-(3,4-二羟苯基)-1-[3,5,7-三羟基-2-(3-羟基苯基)-3,4-二氢-2H-1-苯并吡喃-8-基]丙-2-基]氧基}磺酸	Organic acids	有机酸	Organic acids	有机酸	C30H28O13S	3	0.6173	-	18169.1	56747.6	38541.4	3918.7	3304.48	6698.49	1.34549	0.0954327	0.242767	8.14975	3.02676	up	-	-
MW0135646	6-[6-carboxy-3,4-dihydroxy-2-(3,4,5-trihydroxybenzoyloxy)phenoxy]-3,4,5-trihydroxyoxane-2-carboxylic acid	6-[6-羧基-3，4-二羟基-2-(3，4，5-三羟基苯甲酰氧基）苯氧基]-3，4，5-三羟基恶烷-2-羧酸	Organic acids	有机酸	Organic acids	有机酸	C20H18O16	3	0.6169	-	865219	610847	563170	334621	315311	180916	1.28061	0.0317281	0.146632	2.4544	1.29537	up	-	-
MW0147815	Coumeroic acid	Coumeroic acid	Lignans and Coumarins	木脂素和香豆素	Coumarins	香豆素	C17H14N2O7	3	0.6162	-	220148	182197	170461	98550.2	79700.2	94771.4	1.39017	0.0129015	0.104473	2.09802	1.06903	up	C12478	-
MW0128614	CID 78055824	[2-羟基-5-(3，5，7-三羟基-3，4-二氢-2H-1-苯并吡喃-2-基）苯基]氧代磺酸	Organic acids	有机酸	Organic acids	有机酸	C15H14O9S	3	0.6161	-	63149.8	193695	111041	9649.9	35775.2	64529.6	1.04632	0.139839	0.295874	3.34579	1.74235	up	-	-
MW0132025	3,4,5-trihydroxy-6-{[3,4,5-trihydroxy-2-(4-hydroxyphenyl)-3,4-dihydro-2H-1-benzopyran-7-yl]oxy}oxane-2-carboxylic acid	3,4,5-三羟基-6-{[3,4,5-三羟基-2-(4-羟基苯基)-3,4-二氢-2H-1-苯并吡喃-7-基]氧基}氧烷-2-羧酸	Organic acids	有机酸	Organic acids	有机酸	C21H22O12	3	0.6151	-	17513.1	23503	17791.4	4196.2	7431.1	3490.14	1.3599	0.00569279	0.0796512	3.89004	1.95979	up	-	-
MW0148716	dTDP-3-amino-2,3,6-trideoxy-C-methyl-D-erythro-hexopyranos-4-ulose	dTDP-3-氨基-2,3,6-丁氧基-C-甲基-D-赤型-己基吡喃并-4-ulose	Nucleotides and derivatives	核苷酸及其衍生物	Nucleotides and derivatives	核苷酸及其衍生物	C17H27N3O13P2	3	0.6142	-	39073.7	60710.5	39223	116889	158728	95798.9	1.33101	0.0386973	0.157659	0.374263	-1.41788	down	C12319	ko01100,ko01110,ko01250
MW0054723	Melibiitol	美立比醇	Others	其它类	Saccharides	糖类	C12H24O11	3	0.6109	-	26077	44044.7	32585.8	81974.4	120203	111180	1.36635	0.0139502	0.108164	0.327765	-1.60927	down	C05399	ko00052
MW0128738	[4-(3,5,7-trihydroxy-3,4-dihydro-2H-1-benzopyran-2-yl)-2-{[3,4,5-trihydroxy-6-(hydroxymethyl)oxan-2-yl]oxy}phenyl]oxidanesulfonic acid	[4-(3，5，7-三羟基-3，4-二氢-2H-1-苯并吡喃-2-基)-2-{[3，4，5-三羟基-6-(羟甲基）恶烷-2-基]氧基}苯基]氧代磺酸	Organic acids	有机酸	Organic acids	有机酸	C21H24O14S	3	0.6098	-	96753.1	54674.2	142151	606543	607563	216999	1.2507	0.0951739	0.242375	0.205141	-2.28531	down	-	-
MW0136225	6-[2-[6-carboxy-5-(2,4-dihydroxyphenyl)-3-methylcyclohex-2-en-1-yl]-5-[(E)-2-(2,4-dihydroxyphenyl)ethenyl]-3-hydroxyphenoxy]-3,4,5-trihydroxyoxane-2-carboxylic acid	6-{2-[6-羧基-5-(2，4-二羟基苯基)-3-甲基环己-2-烯-1-基]-5-[（E)-2-(2，4-二羟基苯基）乙烯基]-3-羟基苯氧基}-3，4，5-三羟基氧烷-2-羧酸	Organic acids	有机酸	Organic acids	有机酸	C34H34O14	3	0.6069	-	9209.9	7907.89	3760.99	2228.71	2041.96	2472.88	1.26809	0.102274	0.25202	3.09611	1.63046	up	-	-
MW0147511	cis-Dihomoaconitic acid	顺-(高)-2-乌头酸酯	Organic acids	有机酸	Organic acids	有机酸	C8H10O6	3	0.6059	-	14410.4	15438.3	14158.1	49864.7	66999.2	49157.1	1.42533	0.0195725	0.123728	0.265067	-1.91557	down	C20581	ko01100,ko01210
MW0145537	Arg-Tyr-Asn-Glu	Arg-Tyr-Asn-Glu	Amino acids and derivatives	氨基酸及其衍生物	Amino acids and derivatives	氨基酸及其衍生物	C24H36N8O9	3	0.6052	-	125691	78357.1	93698	262689	198953	259605	1.35416	0.00716299	0.0829653	0.412822	-1.27641	down	-	-
MW0109632	Ser-Pro-Arg	L-丝氨酰-L-脯氨酰-L-精氨酸	Amino acids and derivatives	氨基酸及其衍生物	Amino acids and derivatives	氨基酸及其衍生物	C14H26N6O5	3	0.6037	-	137793	267455	162201	55623.4	64468.1	64864.7	1.34693	0.0842766	0.226298	3.06802	1.61731	up	-	-
MW0013780	3,4,5-trihydroxy-6-{[(3E)-2-hydroxy-4-phenylbut-3-en-1-yl]oxy}oxane-2-carboxylic acid	3，4，5-三羟基-6-{[（3E)-2-羟基-4-苯基丁-3-烯-1-基]氧}氧杂环己烷-2-羧酸	Organic acids	有机酸	Organic acids	有机酸	C16H20O8	3	0.6029	-	178305	257427	287132	88701.5	93740.8	131967	1.31341	0.0372284	0.156184	2.29912	1.20108	up	-	-
MW0132147	3,4,5-trihydroxy-6-{[5-hydroxy-2-(4-hydroxyphenyl)-4-oxo-6,8-bis[3,4,5-trihydroxy-6-(hydroxymethyl)oxan-2-yl]-4H-chromen-7-yl]oxy}oxane-2-carboxylic acid	3，4，5-三羟基-6-{[5-羟基-2-(4-羟基苯基)-4-氧代-6，8-双[3，4，5-三羟基-6-(羟甲基）恶烷-2-基]-4H-色烯-7-基]氧}恶烷-2-羧酸	Organic acids	有机酸	Organic acids	有机酸	C33H38O21	3	0.602	-	15205	16475	22072.2	5623.66	7549.94	2723.08	1.2919	0.0108349	0.0983836	3.38135	1.7576	up	-	-
MW0129140	{2-hydroxy-4-[2-(2-hydroxyphenyl)ethyl]-6-methoxyphenyl}oxidanesulfonic acid	{2-羟基-4-[2-(2-羟基苯基）乙基]-6-甲氧基苯基}氧化磺酸	Organic acids	有机酸	Organic acids	有机酸	C15H16O7S	3	0.6004	-	27131.4	23865.1	19197.4	49825.1	71015.9	65817.8	1.38405	0.0168481	0.115302	0.376055	-1.41099	down	-	-
MW0130495	2-[({3,4-dihydroxy-5-[2,4,5-trihydroxy-3-(3,4,5-trihydroxybenzoyloxy)benzoyloxy]phenyl}(hydroxy)methylidene)amino]acetic acid	2-[（{3，4-二羟基-5-[2，4，5-三羟基-3-(3，4，5-三羟基苯甲酰氧基）苯甲酰氧基]苯基}（羟基）亚甲基）氨基]乙酸	Organic acids	有机酸	Organic acids	有机酸	C23H17NO15	3	0.5994	-	63453.2	79691.2	71866.2	8810.68	16176.7	17934.6	1.38842	0.00126132	0.0554745	5.00933	2.32462	up	-	-
MW0152904	Lys-Asp-Leu-Glu	Lys-Asp-Leu-Glu	Amino acids and derivatives	氨基酸及其衍生物	Amino acids and derivatives	氨基酸及其衍生物	C21H37N5O9	3	0.5975	-	48037.5	49096.9	50212.2	75821.2	107171	114549	1.35179	0.0515258	0.177706	0.495216	-1.01387	down	-	-
MW0141504	16beta-Hydroxy-1'H-5alpha-androstano[3,2-c]pyrazole-17-one	16beta-Hydroxy-1'H-5alpha-androstano[3,2-c]pyrazole-17-one	Lipids	脂质	Free fatty acids	游离脂肪酸	C20H28N2O2	3	0.597	-	22701.6	25800.8	8369.24	31647.8	39910.9	48196.3	1.08379	0.0441032	0.167394	0.4749	-1.07431	down	-	-
MW0052317	D-Gal alpha 1->6D-Gal alpha 1->6D-Glucose	甘露三糖	Others	其它类	Saccharides	糖类	C18H32O16	3	0.5968	-	38031.6	27631.6	25208.7	12255	12779.5	10441.5	1.37959	0.0388125	0.157697	2.5615	1.35699	up	C05404	ko00052,ko01100
MW0130245	2-(3-hydroxyphenyl)-4-[3,5,7-trihydroxy-2-(4-hydroxy-3-methoxyphenyl)-3,4-dihydro-2H-1-benzopyran-8-yl]-6-[3,4,5-trihydroxy-6-(hydroxymethyl)oxan-2-yl]-3,4-dihydro-2H-1-benzopyran-3,5,7-triol	2-(3-羟基苯基)-4-[3，5，7-三羟基-2-(4-羟基-3-甲氧基苯基)-3，4-二氢-2H-1-苯并吡喃-8-基]-6-[3，4，5-三羟基-6-(羟甲基）恶烷-2-基]-3，4-二氢-2H-1-苯并吡喃-3，5，7-三醇	Benzene and substituted derivatives	苯及其衍生物	Benzene and substituted derivatives	苯及其衍生物	C37H38O16	3	0.5962	-	14262.7	24917.4	15300.3	11757.2	3445.12	10519.9	1.01353	0.0926543	0.238842	2.11802	1.08272	up	-	-
MW0131567	3,4,5-trihydroxy-6-({5-hydroxy-7-methoxy-4-oxo-2-phenyl-8-[3,4,5-trihydroxy-6-(hydroxymethyl)oxan-2-yl]-4H-chromen-6-yl}oxy)oxane-2-carboxylic acid	3，4，5-三羟基-6-({5-羟基-7-甲氧基-4-氧代-2-苯基-8-[3，4，5-三羟基-6-(羟甲基）恶烷-2-基]-4H-色烯-6-基}氧基）恶烷-2-羧酸	Organic acids	有机酸	Organic acids	有机酸	C28H30O16	3	0.596	-	22353	40113.1	45105.8	74710	59668.1	165974	1.13381	0.188497	0.347349	0.358152	-1.48136	down	-	-
MW0133219	(E)-3-phenyl-1-(2,4,6-trihydroxy-3,5-dimethylphenyl)prop-2-en-1-one	(E)-3-苯基-1-(2,4,6-三羟基-3,5-二甲基苯基)prop-2-en-1-one	Others	其它类	Ketone compounds	酮类化合物	C17H16O4	3	0.594	-	140741	209483	213598	360487	390132	485886	1.33308	0.0115497	0.101883	0.455981	-1.13295	down	-	-
MW0112631	3,4,5-trihydroxy-6-{[5-hydroxy-2-(3-hydroxyphenyl)-3-[(3,4,5-trihydroxyoxan-2-yl)oxy]-5H-chromen-7-yl]oxy}oxane-2-carboxylic acid	3，4，5-三羟基-6-{[5-羟基-2-(3-羟基苯基)-3-[（3，4，5-三羟基恶烷-2-基）氧]-5H-色烯-7-基]氧}恶烷-2-羧酸	Organic acids	有机酸	Organic acids	有机酸	C26H27O15	3	0.5907	-	33564	36982.1	15629.8	77773.1	71448.3	257735	1.19159	0.220976	0.381648	0.211757	-2.23952	down	-	-
MW0131608	3,4,5-trihydroxy-6-({7-hydroxy-4-oxo-8-[3,4,5-trihydroxy-6-(hydroxymethyl)oxan-2-yl]-2-(2,4,5-trihydroxyphenyl)-4H-chromen-5-yl}oxy)oxane-2-carboxylic acid	3，4，5-三羟基-6-({7-羟基-4-氧代-8-[3，4，5-三羟基-6-(羟甲基）恶烷-2-基]-2-(2，4，5三羟基苯基)-4H-色烯-5-基}氧基）恶烷-2-羧酸	Organic acids	有机酸	Organic acids	有机酸	C27H28O18	3	0.5906	-	28397.8	15340.7	35605.4	96621.3	87547.1	28805	1.01141	0.163642	0.322009	0.372553	-1.42448	down	-	-
MW0134951	6-(4,5-dihydroxy-2-{5-hydroxy-7-methoxy-4-oxo-6-[3,4,5-trihydroxy-6-(hydroxymethyl)oxan-2-yl]-4H-chromen-2-yl}phenoxy)-3,4,5-trihydroxyoxane-2-carboxylic acid	6-(4，5-二羟基-2-{5-羟基-7-甲氧基-4-氧代-6-[3，4，5-三羟基-6-(羟甲基）恶烷-2-基]-4H-色烯-2-基}苯氧基)-3，4，5-三羟基恶烷-2-羧酸	Organic acids	有机酸	Organic acids	有机酸	C28H30O18	3	0.5885	-	119400	79849.1	121513	16034.3	28514.4	8313.42	1.34034	0.0118527	0.102424	6.06789	2.6012	up	-	-
MW0136238	6-{3,4-dihydroxy-5-[2,4,5-trihydroxy-3-(3,4,5-trihydroxybenzoyloxy)benzoyloxy]benzoyloxy}-3,4,5-trihydroxyoxane-2-carboxylic acid	6-{3，4-二羟基-5-[2，4，5-三羟基-3-(3，4，5-三羟基苯甲酰氧基）苯甲酰氧基]苯甲酰氧基}-3，4，5三羟基恶烷-2-羧酸	Organic acids	有机酸	Organic acids	有机酸	C27H22O20	3	0.5851	-	19844.4	42462.4	46083.1	6629.28	13559	2745.65	1.22109	0.059191	0.187856	4.72619	2.24068	up	-	-
MW0132101	3,4,5-Trihydroxy-6-[4-hydroxy-2-oxo-3-(3-oxo-1-phenylbutyl)chromen-7-yl]oxyoxane-2-carboxylic acid	3,4,5-三羟基-6-{[4-羟基-2-氧代-3-(3-氧代-1-苯基丁基)-2H-铬-7-基]氧基}氧烷-2-羧酸	Organic acids	有机酸	Organic acids	有机酸	C25H24O11	3	0.5838	-	52327.5	42423.6	44659.5	27869.8	13113	13414.7	1.28599	0.0123053	0.103343	2.56281	1.35773	up	-	-
MW0057610	PC(22:5(7Z,10Z,13Z,16Z,19Z)/15:0)	PC(22:5(7Z,10Z,13Z,16Z,19Z)/15:0)	GP	甘油磷脂类	PC	磷脂酰胆碱	C45H80NO8P	3	0.5831	-	14691.4	28628.1	19125.8	53320.7	57104.5	37880.9	1.27871	0.0202106	0.125371	0.421057	-1.24791	down	C00157	ko00564,ko00590,ko00591,ko00592,ko01100,ko01110
MW0057434	PC(20:5(5Z,8Z,11Z,14Z,17Z)/22:5(4Z,7Z,10Z,13Z,16Z))	PC(20:5(5Z,8Z,11Z,14Z,17Z)/22:5(4Z,7Z,10Z,13Z,16Z))	GP	甘油磷脂类	PC	磷脂酰胆碱	C50H80NO8P	3	0.5793	-	94215.8	117563	80746.6	336666	338609	1.00965e+06	1.30728	0.173767	0.332761	0.173614	-2.52605	down	-	-
MW0156467	S-(Hydroxymethyl)mycothiol	S-(羟甲基)霉硫醇	Others	其它类	Saccharides	糖类	C18H32N2O13S	3	0.573	-	6502	38069.4	50350.6	101848	110671	79780.6	1.06145	0.0181931	0.119231	0.324742	-1.62264	down	C18235	-
MW0118750	1,3,4-Oxadiazole, 2-methyl-5-[3-[4-(methylsulfinyl)phenyl]-5-benzofuranyl]-	1,3,4-恶二唑，2-甲基-5-[3-[4-(甲基亚磺酰基)苯基]-5-苯并呋喃基]-	Benzene and substituted derivatives	苯及其衍生物	Benzene and substituted derivatives	苯及其衍生物	C18H14N2O3S	3	0.5723	-	29027.5	4528.78	6151.34	1677.89	1342.74	1026.23	1.23084	0.271711	0.427369	9.81197	3.29454	up	-	-
MW0135786	6-{[2-(3,4-dihydroxyphenyl)-4-[2-(3,4-dihydroxyphenyl)-3,5,7-trihydroxy-3,4-dihydro-2H-1-benzopyran-8-yl]-3,5-dihydroxy-6-[3,4,5-trihydroxy-6-(hydroxymethyl)oxan-2-yl]-3,4-dihydro-2H-1-benzopyran-7-yl]oxy}-3,4,5-trihydroxyoxane-2-carboxylic acid	6-{[2-(3，4-二羟基苯基)-4-[2-(3，4-二羟基苯基)-3，5，7-三羟基-3，4-二氢-2H-1-苯并吡喃-8-基]-3，5-二羟基-6-[3，4，5-三羟基-6-(羟甲基）恶烷-2-基]-3，4-三氢-2H-1-苯并吡喃-7-基]氧基}-3，4，5-三羟基恶烷-2-羧酸	Organic acids	有机酸	Organic acids	有机酸	C42H44O23	3	0.5692	-	28916.7	23438.8	9256.97	44875.8	64262.3	145213	1.18601	0.167682	0.32652	0.242234	-2.04553	down	-	-
MW0132496	3,4,5-trihydroxy-6-{4-[5,6,7-trihydroxy-4-oxo-8-(3,4,5-trihydroxyoxan-2-yl)-4H-chromen-2-yl]phenoxy}oxane-2-carboxylic acid	3，4，5-三羟基-6-{4-[5，6，7-三羟基-4-氧代-8-(3，4，5-三羟基恶烷-2-基)-4H-苯并吡喃-2-基]苯氧基}恶烷-2-羧酸	Organic acids	有机酸	Organic acids	有机酸	C26H26O16	3	0.5577	-	58558.8	57824.1	67248.4	11108.3	4714.06	7741.34	1.4039	0.000367663	0.0456788	7.79296	2.96217	up	-	-
MW0112620	3,4,5-trihydroxy-6-{[4-hydroxy-2,5-bis(hydroxymethyl)-2-{[3,4,5-trihydroxy-6-(hydroxymethyl)oxan-2-yl]oxy}oxolan-3-yl]oxy}oxane-2-carboxylic acid	3，4，5-三羟基-6-{[4-羟基-2，5-二（羟甲基)-2-{[3，4，5-三羟基-6-(羟甲基）恶烷-2-基]氧}氧杂环戊烷-3-基]氧}恶烷-2-羧酸	Organic acids	有机酸	Organic acids	有机酸	C18H30O17	3	0.5502	-	17523.3	16275.2	16472	42328.1	34645.5	34168.8	1.41833	0.0150051	0.110866	0.452307	-1.14462	down	-	-
MEDP0224	D-Fructose	D-果糖	Others	其它类	Saccharides	糖类	C6H12O6	3	0.5487	-	44339.5	36242.5	37532.8	14569	9972.93	8567.14	1.39555	0.00122166	0.0554745	3.56744	1.83489	up	C05003	-
MW0131775	3,4,5-trihydroxy-6-[(7-hydroxy-4-oxo-3-{[3,4,5-trihydroxy-6-(hydroxymethyl)oxan-2-yl]oxy}-2-(3,4,5-trihydroxyphenyl)-4H-chromen-5-yl)oxy]oxane-2-carboxylic acid	3，4，5-三羟基-6-[（7-羟基-4-氧代-3-{[3，4，5-三羟基-6-(羟甲基）恶烷-2-基]氧基}-2-(3，5，5-三羟基苯基)-4H-苯并吡喃-5-基）氧基]恶烷-2-羧酸	Organic acids	有机酸	Organic acids	有机酸	C27H28O19	3	0.5485	-	3820.9	3818.46	7219.54	48416.6	53138.7	21601.4	1.36239	0.0648612	0.198258	0.12065	-3.0511	down	-	-
MW0110307	L-Tyrosyl-L-Threonine	酪氨酰-苏氨酸	Amino acids and derivatives	氨基酸及其衍生物	Amino acids and derivatives	氨基酸及其衍生物	C13H18N2O5	3	0.5457	-	52086	45911.7	51414.3	17840.5	20193.4	18598.8	1.43392	0.00167574	0.0608665	2.63827	1.39959	up	-	-
MW0161388	Mycothiol-bimane conjugate	Mycothiol-bimane 缀合物	Alcohol and amines	醇、胺类	Amines	胺类	C27H40N4O14S	3	0.5442	-	1431.13	1491.43	761.8	1852.81	1766.55	3994.34	1.0347	0.207479	0.366628	0.483912	-1.04718	down	-	-
MW0104915	3,4-Dihydroxy-5-sulooxycyclohexene-1-carboxylic acid	3，4-二羟基-5-(磺氧基）环己-1-烯-1-羧酸	Organic acids	有机酸	Organic acids	有机酸	C7H10O8S	3	0.5399	-	25563.5	26198.1	17243.4	5576.61	8752.22	14471.9	1.19971	0.0265128	0.137302	2.39595	1.2606	up	-	-
MW0140467	(R)-NADPHX	(R)-NADPHX	Nucleotides and derivatives	核苷酸及其衍生物	Nucleotides and derivatives	核苷酸及其衍生物	C21H32N7O18P3	3	0.5377	-	353.55	302.13	624.55	4982.05	4846.41	5093.93	1.4183	8.38667e-06	0.0129714	0.0857926	-3.543	down	C20483	-
MW0112488	3,4,5-trihydroxy-6-[2-methoxy-4-(3-oxobut-1-en-1-yl)phenoxy]oxane-2-carboxylic acid	[2-甲氧基-4-(3-氧代丁基-1-烯-1-基）苯基]氧化磺酸	Benzene and substituted derivatives	苯及其衍生物	Benzene and substituted derivatives	苯及其衍生物	C17H20O9	3	0.532	-	50270.6	53479.6	55508.7	15304.5	23437.1	19391.9	1.4002	0.00062876	0.0506524	2.73954	1.45393	up	-	-
MW0104525	2-amino-4-({1-[(carboxymethyl)-C-hydroxycarbonimidoyl]-2-[(1,3-dihydroxy-2-pentyl-1-phenylpropan-2-yl)sulfanyl]ethyl}-C-hydroxycarbonimidoyl)butanoic acid	2-氨基-4-({1-[（羧甲基)-C-羟基亚氨基甲酰基]-2-[（1，3-二羟基-2-戊基-1-苯基丙-2-基）硫烷基]乙基}-C-羟基亚氨基甲酰基）丁酸	Organic acids	有机酸	Organic acids	有机酸	C24H37N3O8S	3	0.5223	-	163457	109703	132742	7186.97	21439.9	37575.4	1.29011	0.00683066	0.0823916	6.13124	2.61618	up	-	-
MW0136345	6-{4-[(1E)-3-{3-[5-(2,4-dihydroxyphenyl)-6-(5-hydroxy-2,2-dimethyl-2H-chromene-6-carbonyl)-3-methylcyclohex-2-en-1-yl]-2,4-dihydroxyphenyl}-3-oxoprop-1-en-1-yl]-3-hydroxyphenoxy}-3,4,5-trihydroxyoxane-2-carboxylic acid	6-{4-[（1E)-3-{3-[5-(2，4-二羟基苯基)-6-(5-羟基-2，2-二甲基-2H-苯并吡喃-6-羰基)-3-甲基环己-2-烯-1-基]-2，4-二羟基苯基}-3-氧代丙-1-烯-1-基]-3-羟基苯氧基}-3，4，5-三羟基恶烷-2-羧酸	Organic acids	有机酸	Organic acids	有机酸	C46H44O16	3	0.5222	-	3700.05	711.68	2174.82	8450.24	7092.29	11205.4	1.21708	0.0134017	0.106297	0.246246	-2.02183	down	-	-
MW0144923	alpha-1,5-L-Arabinotetraose	ALPHA-1，5-L-阿拉伯四糖	Others	其它类	Saccharides	糖类	C20H34O17	3	0.5214	-	97108	100809	102051	36791.6	38669.8	25007.1	1.40036	0.0018022	0.0629092	2.98569	1.57806	up	C20572	ko02010
MW0142733	dTDP-3-dehydro-6-deoxy-alpha-D-glucose	3，6-二脱氧-3-氧代-DTDP-D-葡萄糖；dTDP-3-氧代-6-脱氧-D-葡萄糖；dTDP-3-氧代-6-脱氧-α-D-葡萄糖；dTDP-3-脱氢-6-脱氧-α-D-吡喃葡萄糖；DTDP-6-脱氧-D-核糖己糖-3-酮糖	Nucleotides and derivatives	核苷酸及其衍生物	Nucleotides and derivatives	核苷酸及其衍生物	C16H24N2O15P2	3	0.5199	-	4837	6662.1	7624.22	1567.39	1942.74	2629.96	1.36161	0.02264	0.129531	3.1145	1.639	up	-	-
MW0013910	3-Acetoxypregn-16-en-12,20-dione	3-ACETOXYPREGN-16-EN-12,20-DIONE	Others	其它类	Ketone compounds	酮类化合物	C23H32O4	3	0.5194	-	207.21	779.91	325	6995.17	11380.6	9197.55	1.39676	0.0187201	0.121278	0.0475866	-4.3933	down	-	-
MW0144702	Ala-Phe-Tyr-Arg	Ala-Phe-Tyr-Arg	Amino acids and derivatives	氨基酸及其衍生物	Amino acids and derivatives	氨基酸及其衍生物	C27H37N7O6	3	0.5051	-	1520.88	2235.31	226.82	2056.34	8551.07	15421.6	1.05542	0.194788	0.355161	0.153022	-2.70819	down	-	-
